# Supplementary material for: Comparative Proteomic Study of the Antiproliferative Activity of Frog Host-Defence Peptide Caerin 1.9 and Its Additive Effect with Caerin 1.1 on TC-1 Cells Transformed with HPV16 E6 and E7
Source: Hindawi journal article supplement (doi:10.1155/2018/7382351), 2018-01-01

Other significantly modulated pathways  
predicted from caerin 1.9-treated TC-1 cell proteome

Signaling by Rho Family GTPases

Extracellular space

Cytoplasm

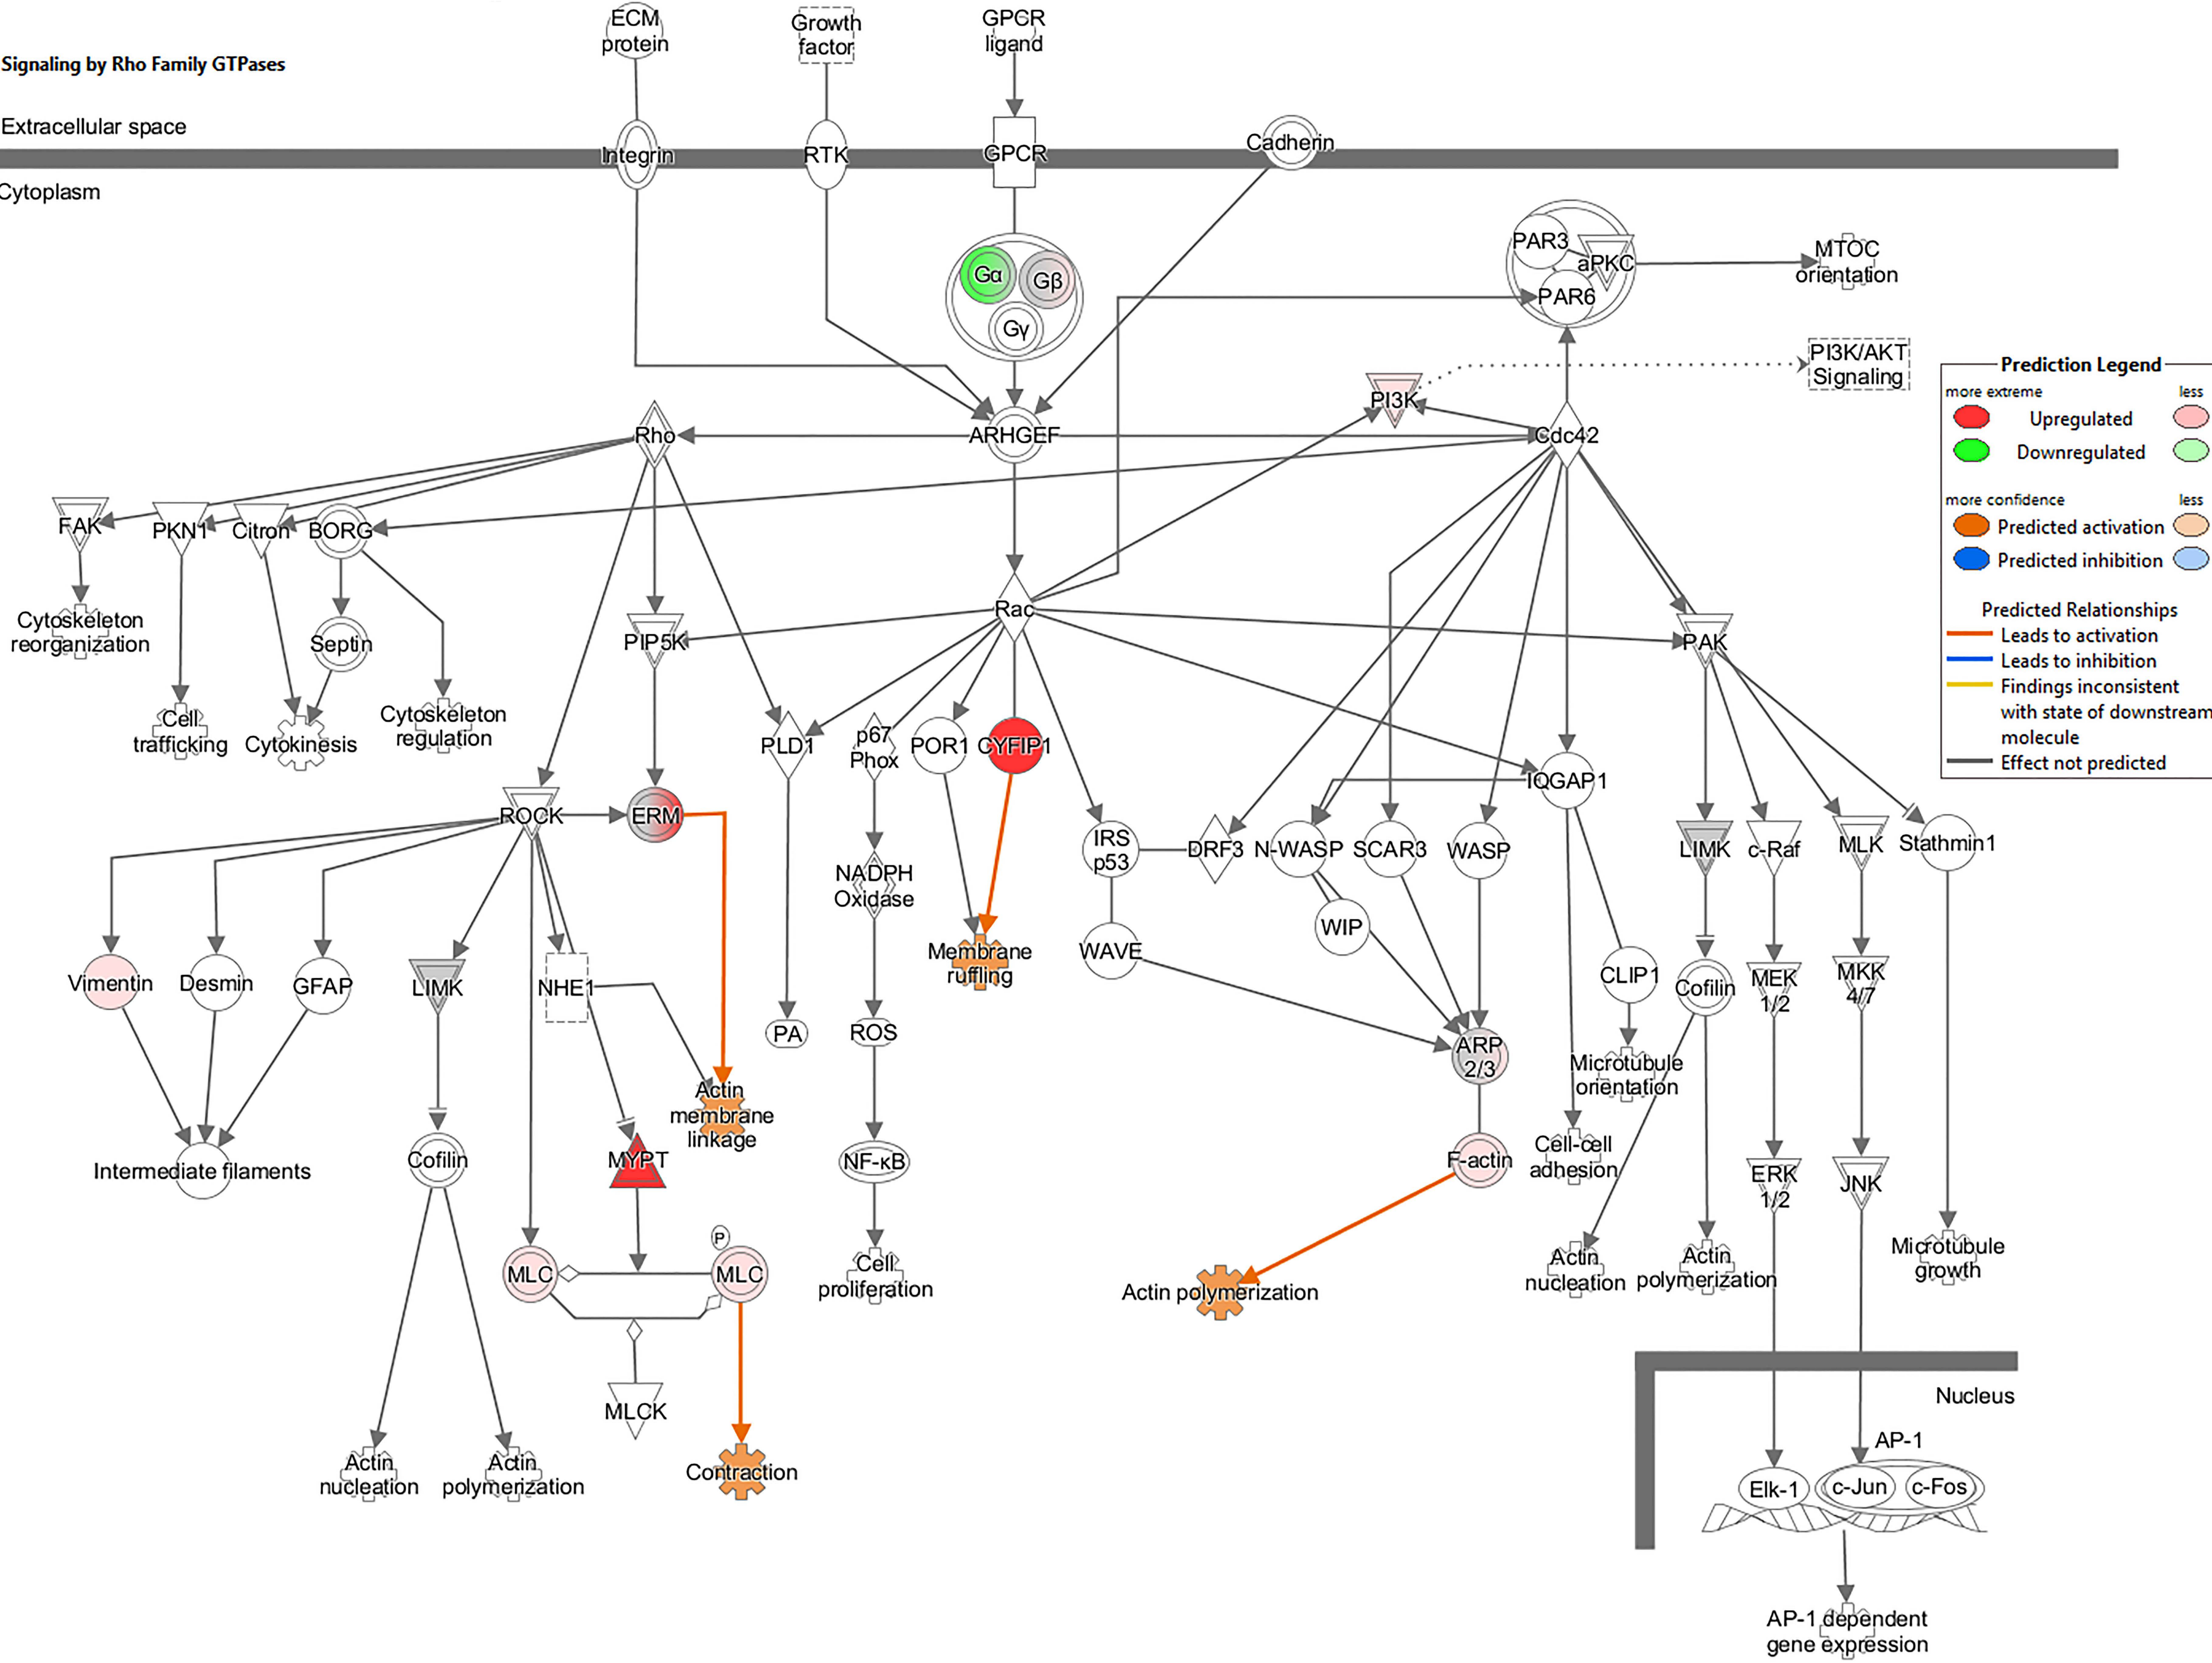

# Chemokine Signaling

Extracellular space

Cytoplasm

Nucleus

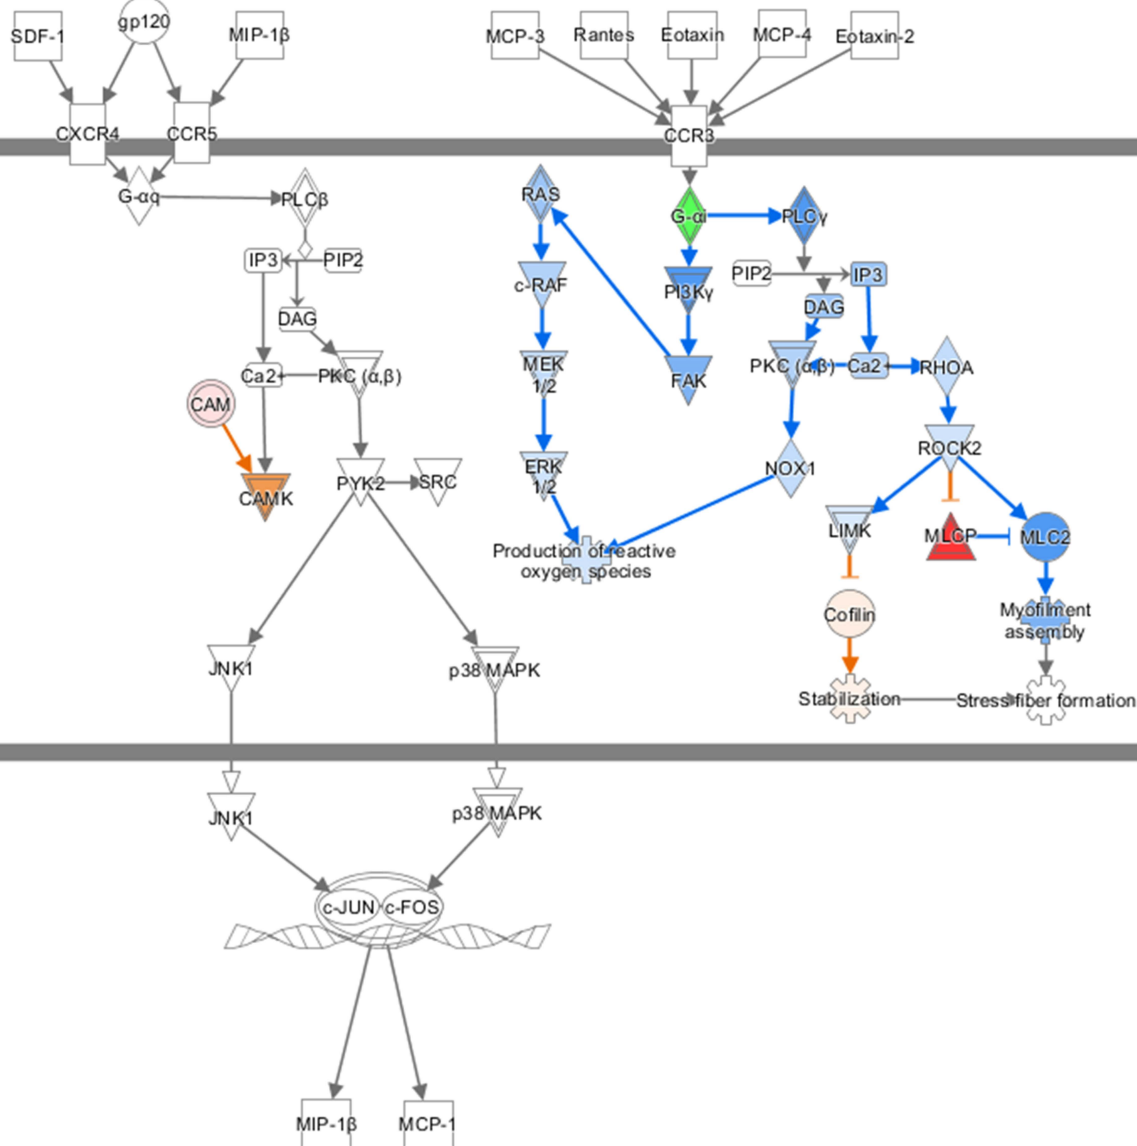

CXCR4 Signalling

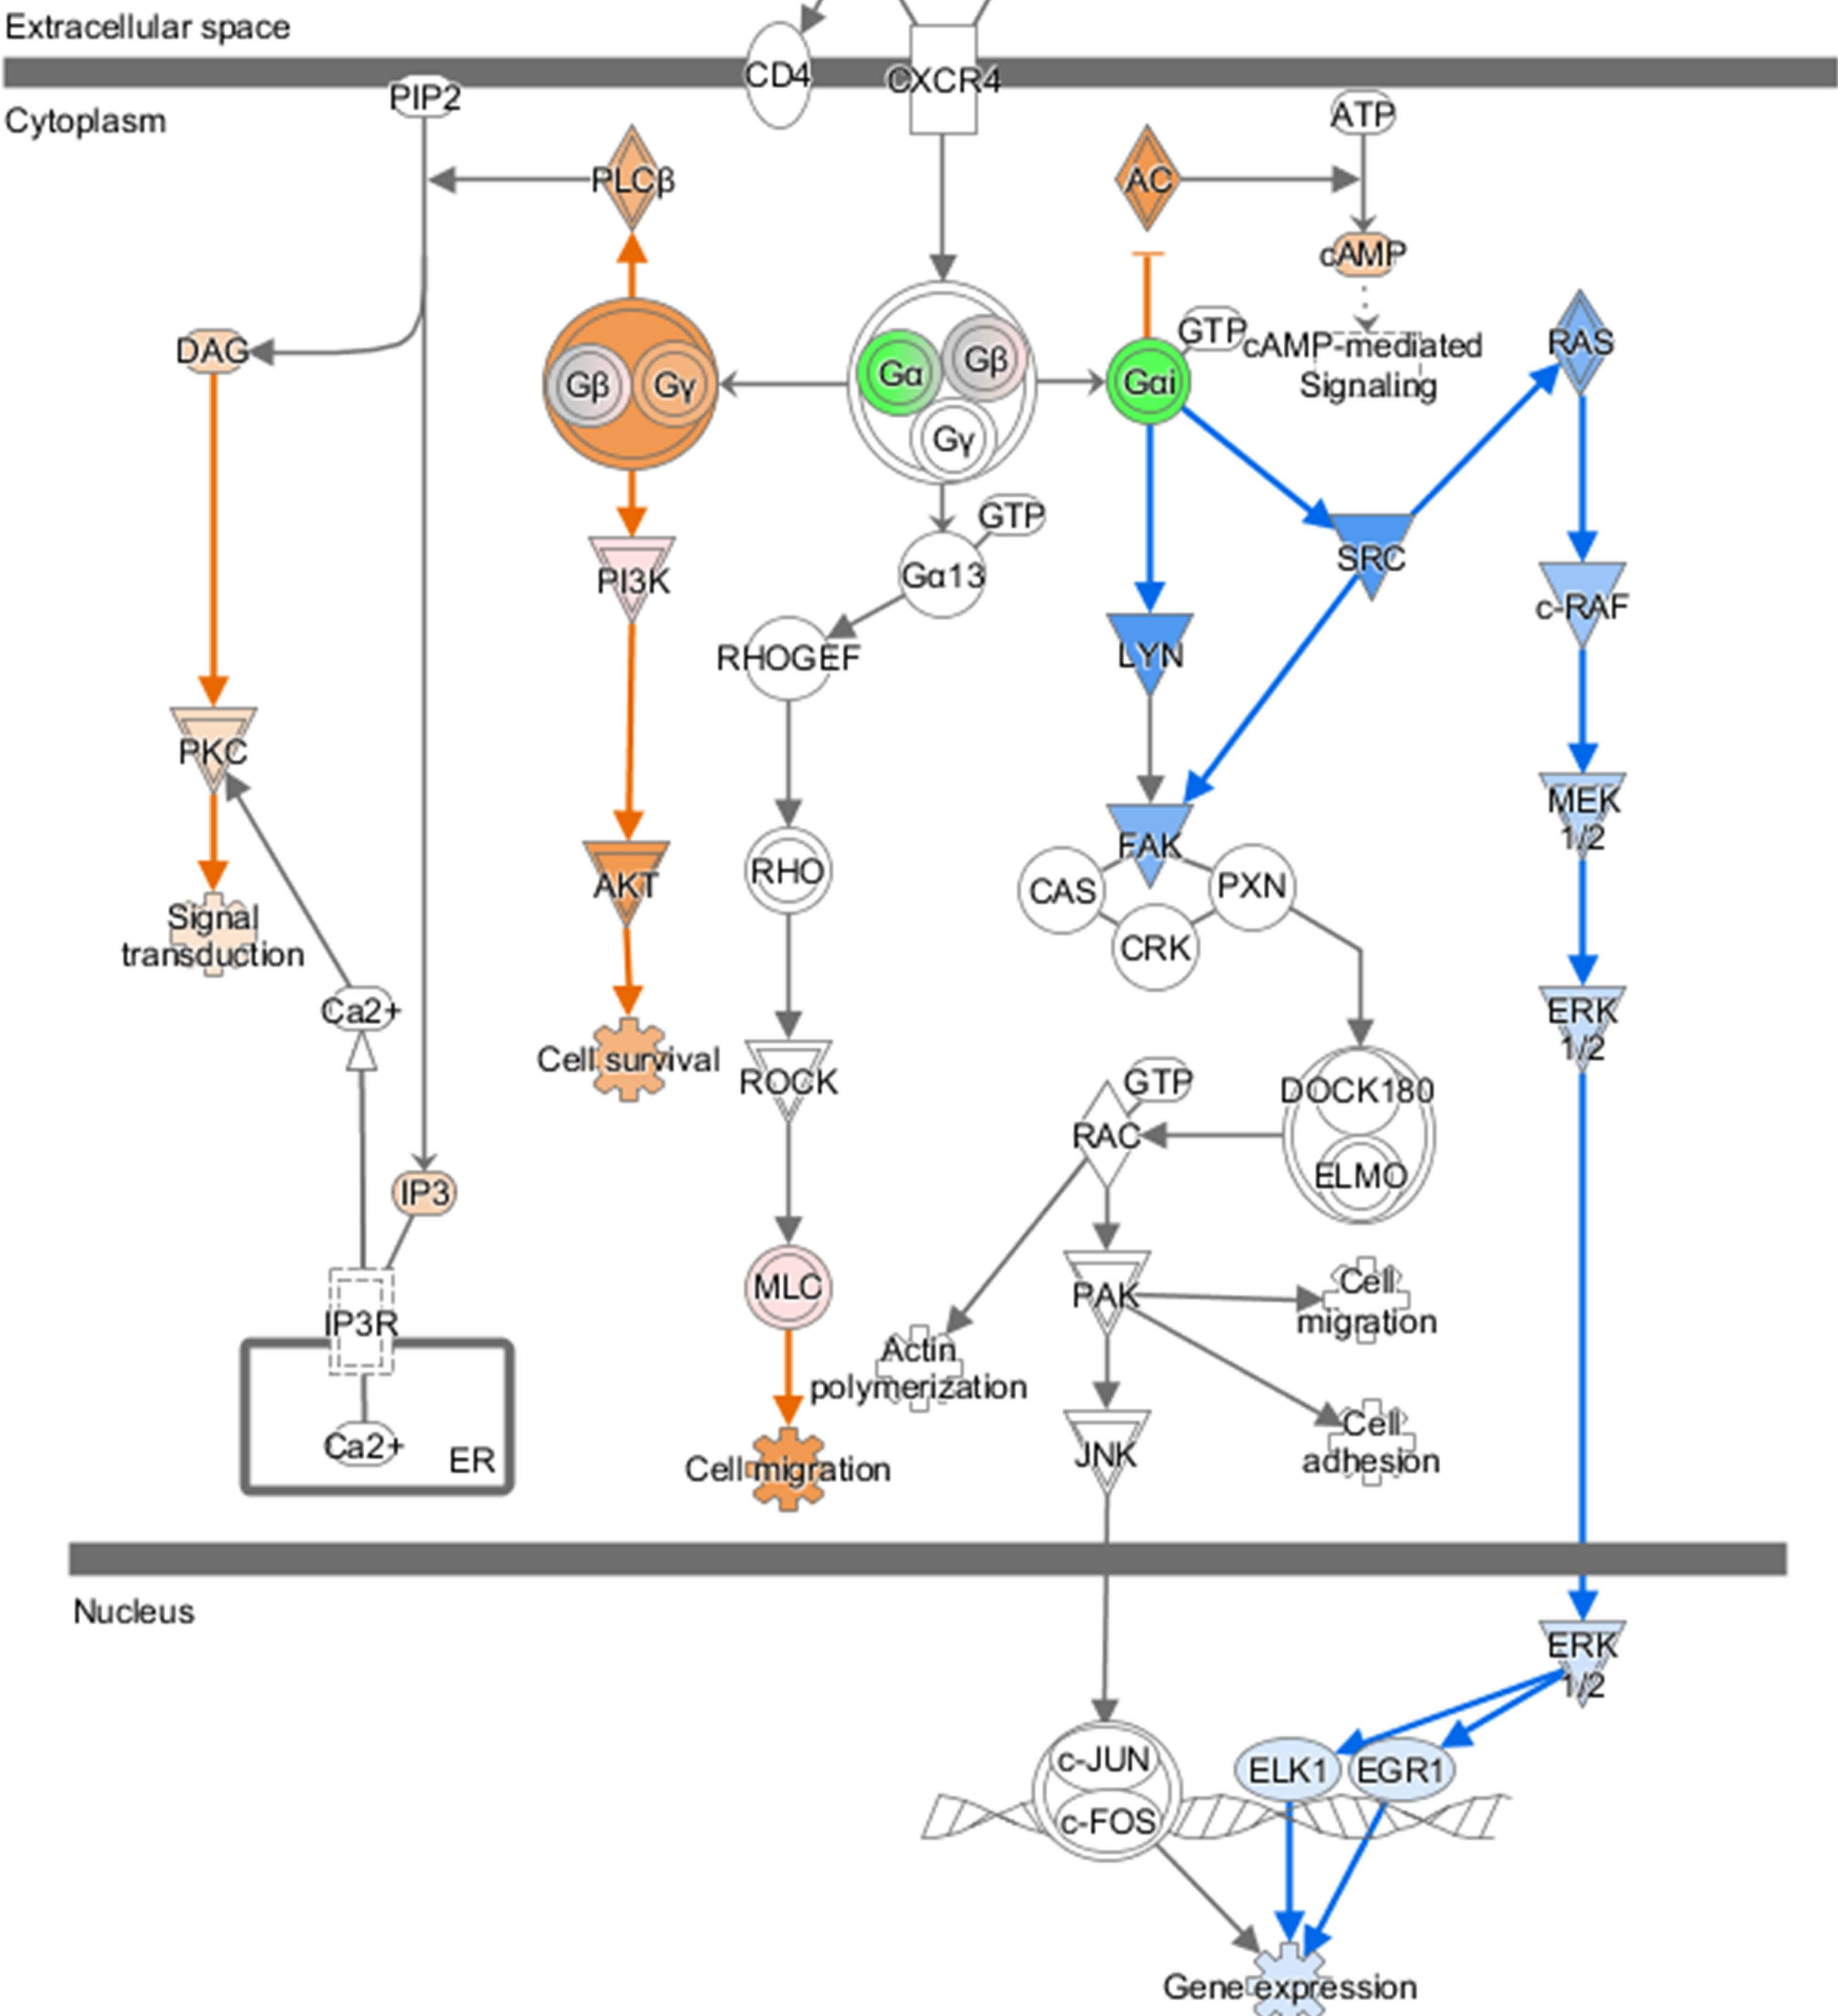

Hypertrophy signalling

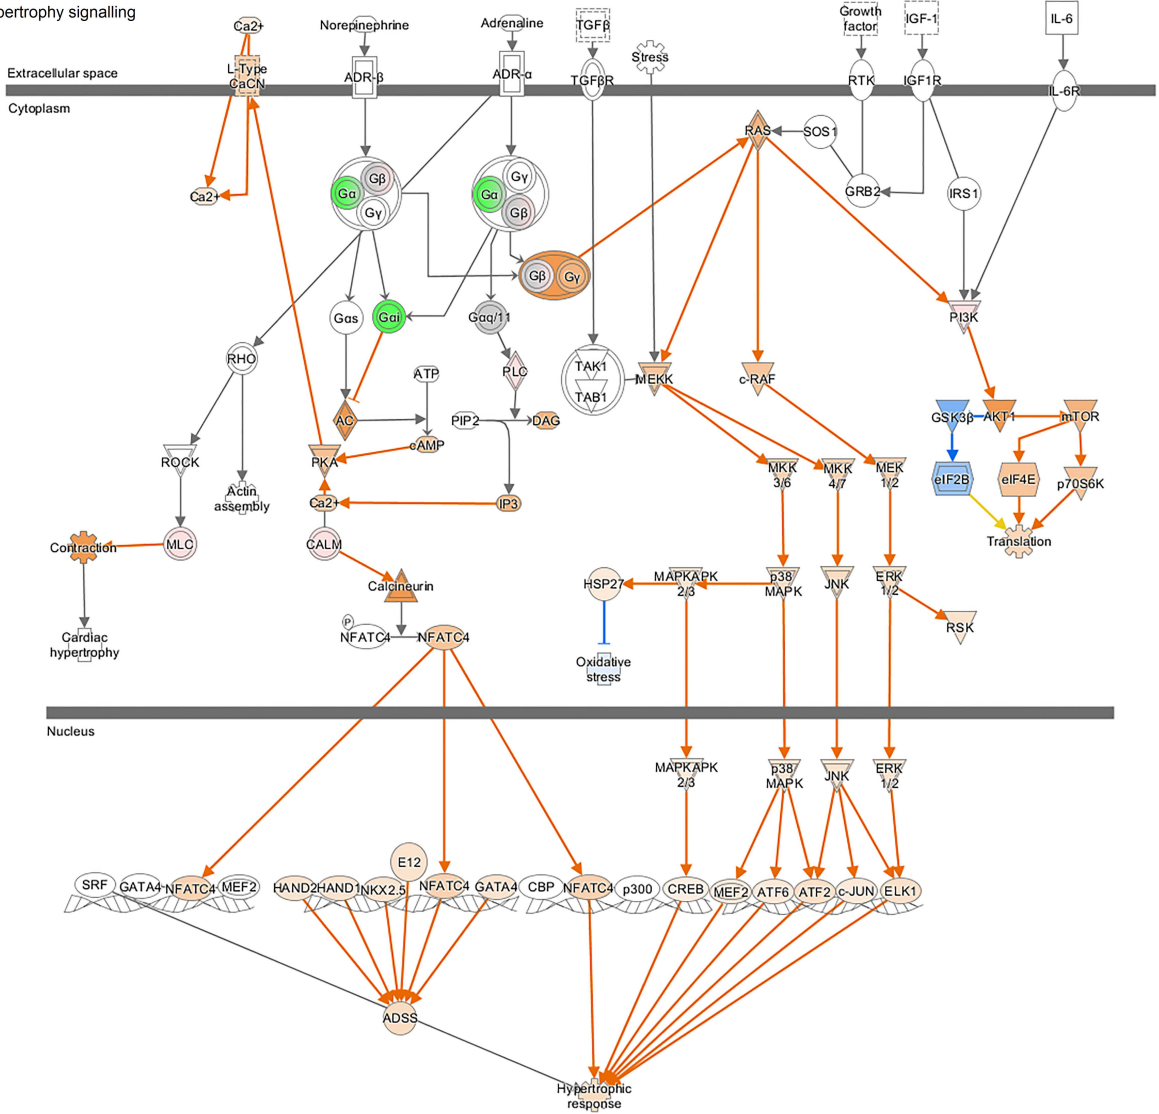

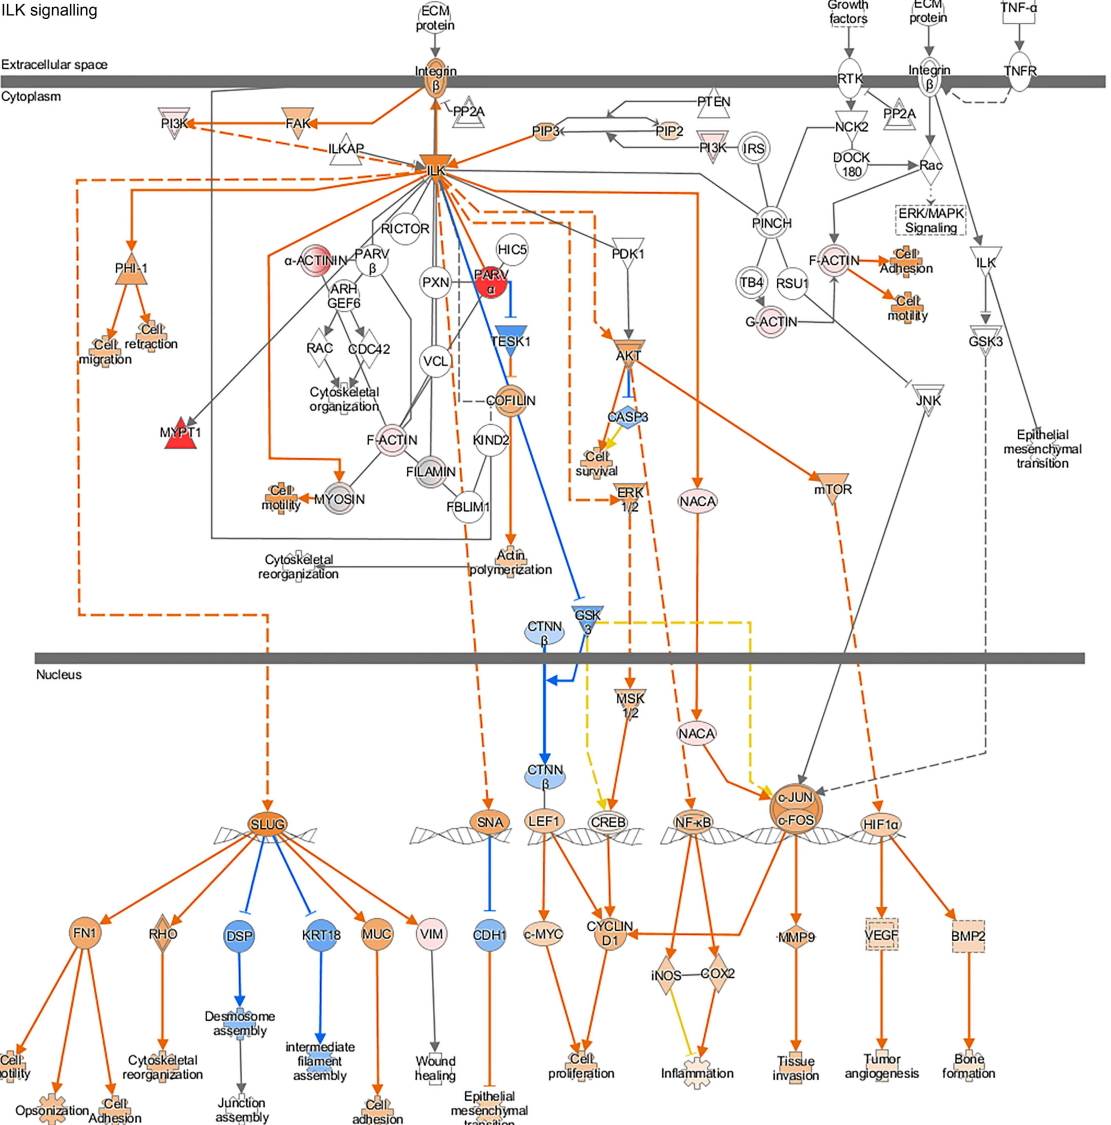

## Integrin signalling

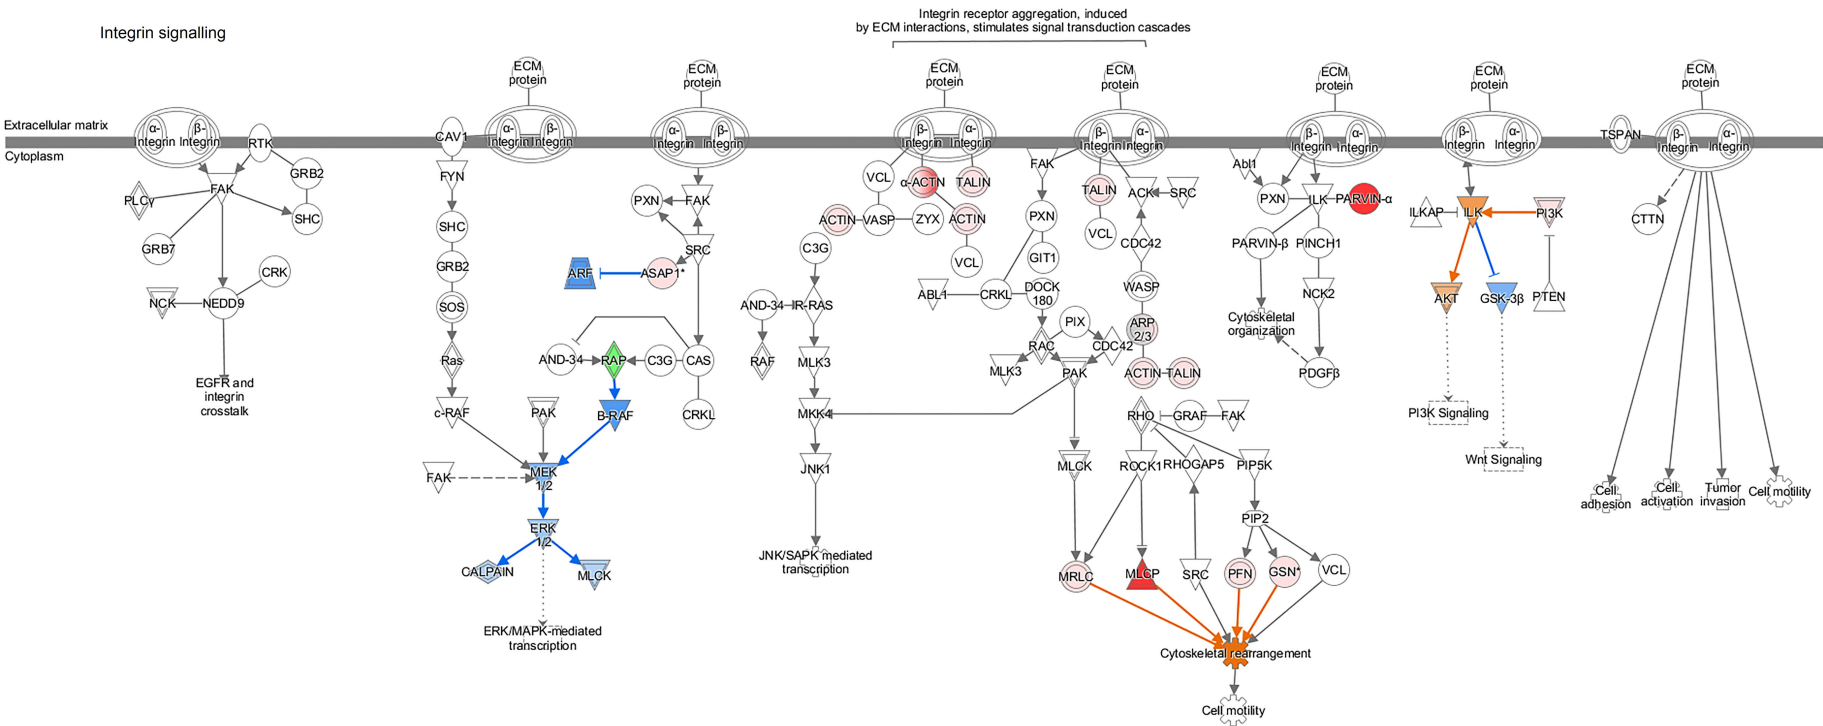

Leukocyte transmigration  
through capillary endothelial layer

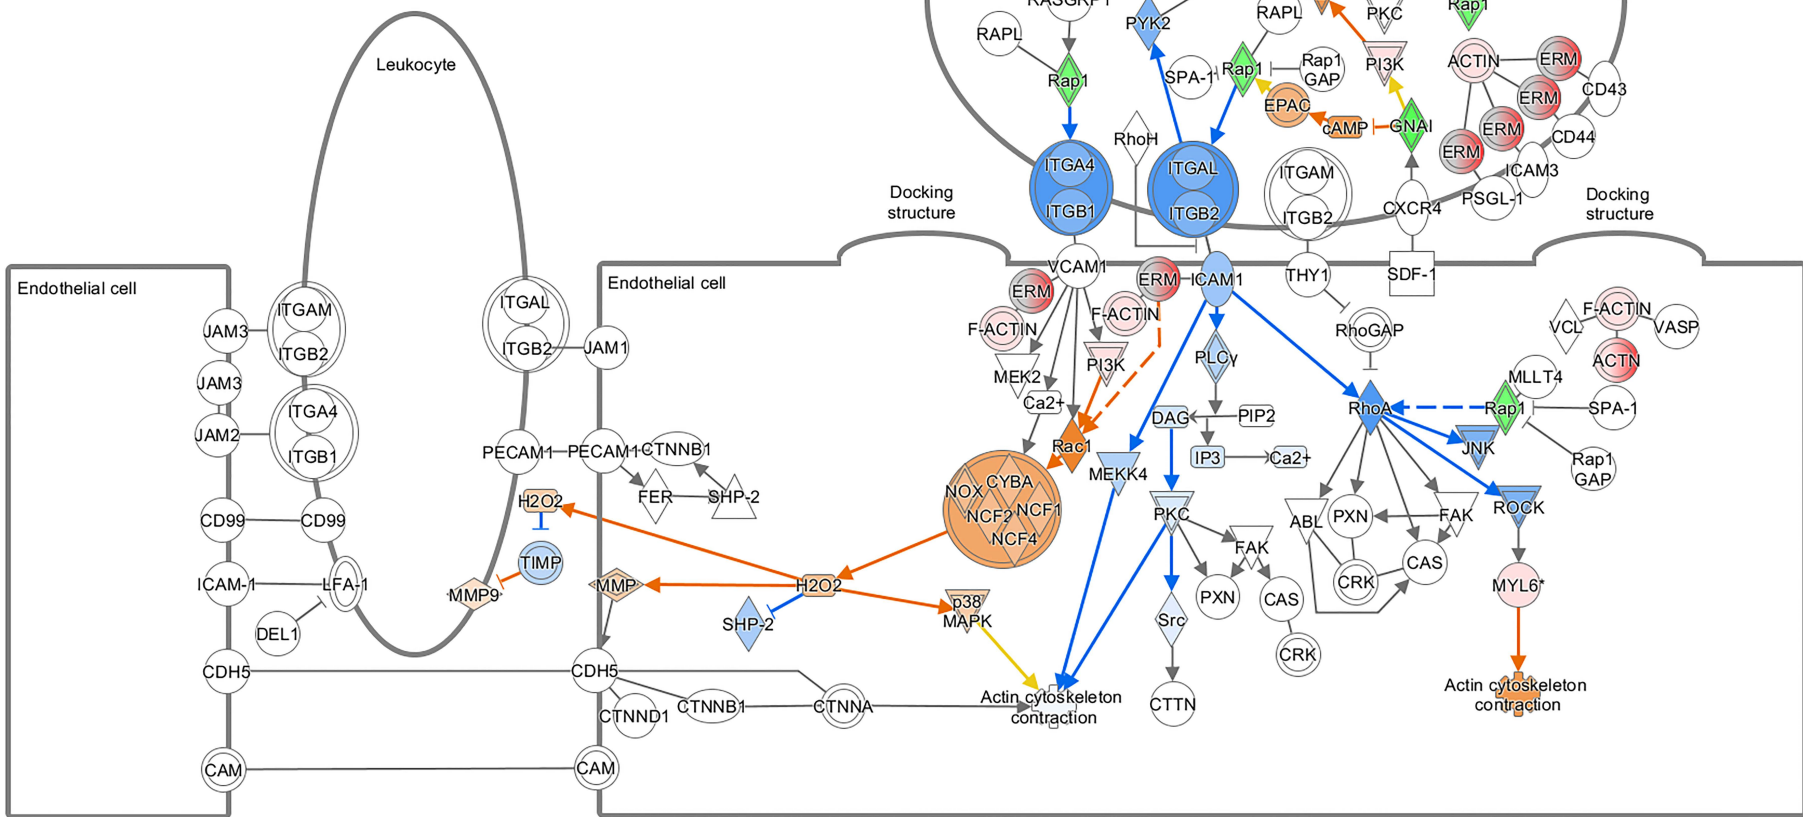

LXR/RXR activation

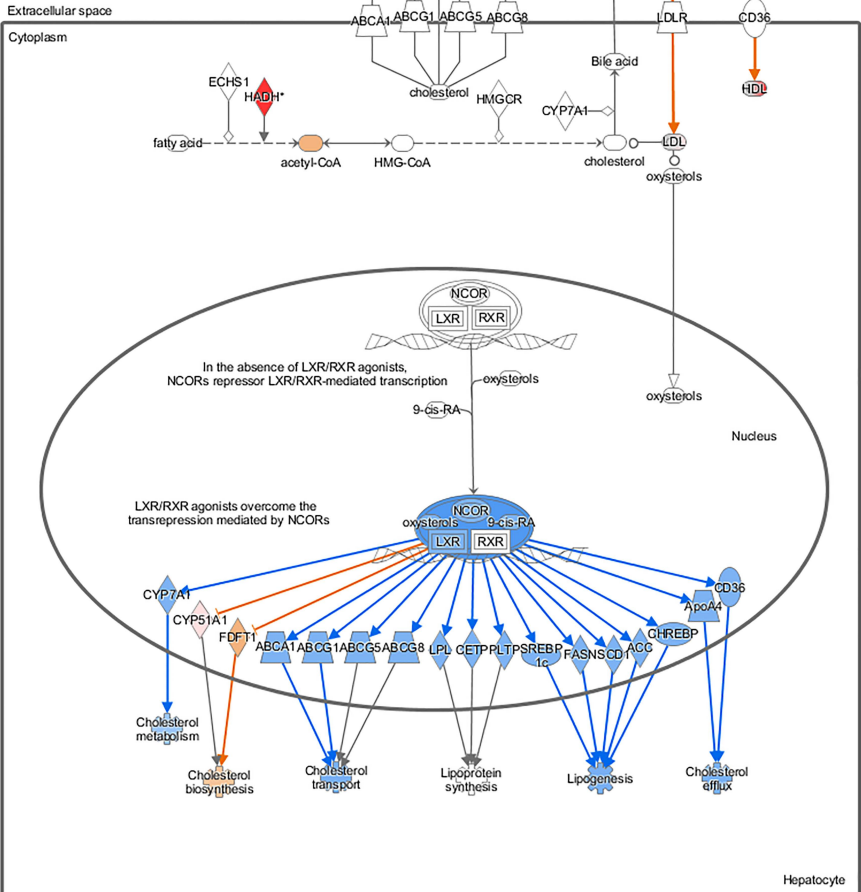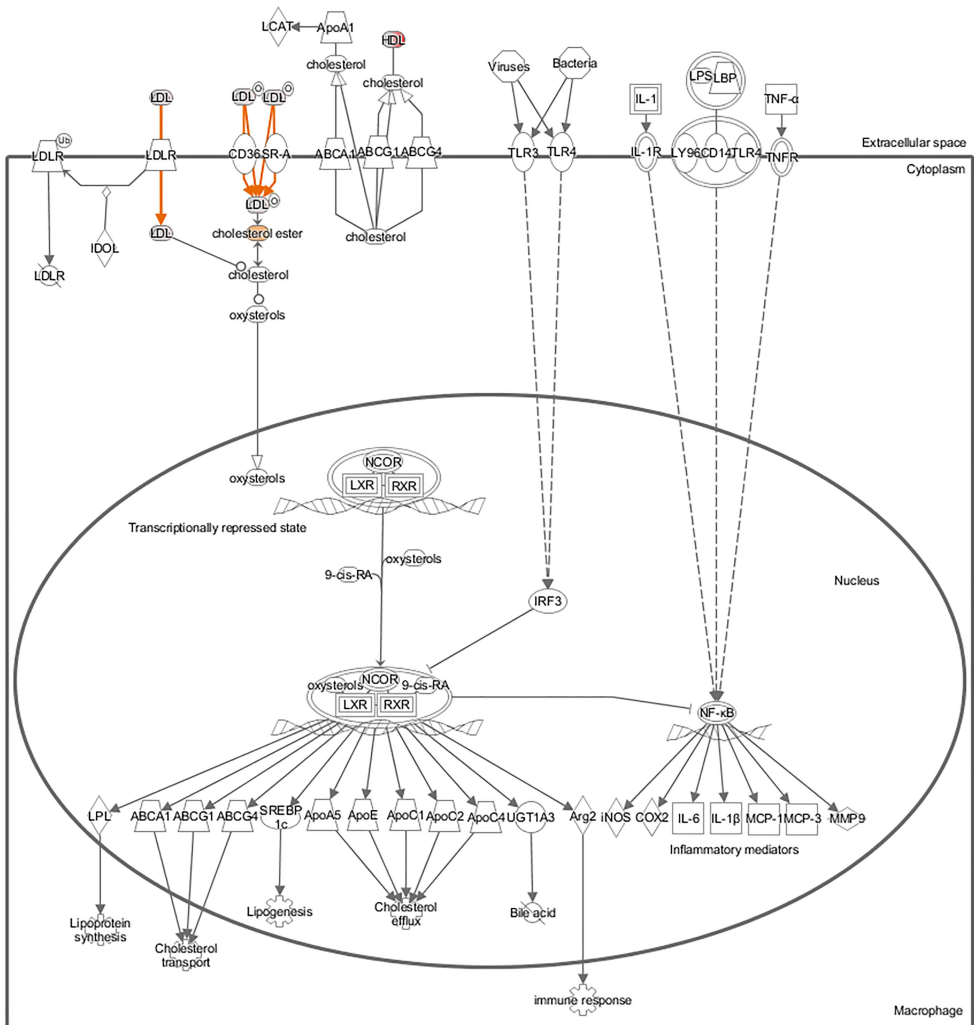

# NO signalling

Extracellular space

Cytoplasm

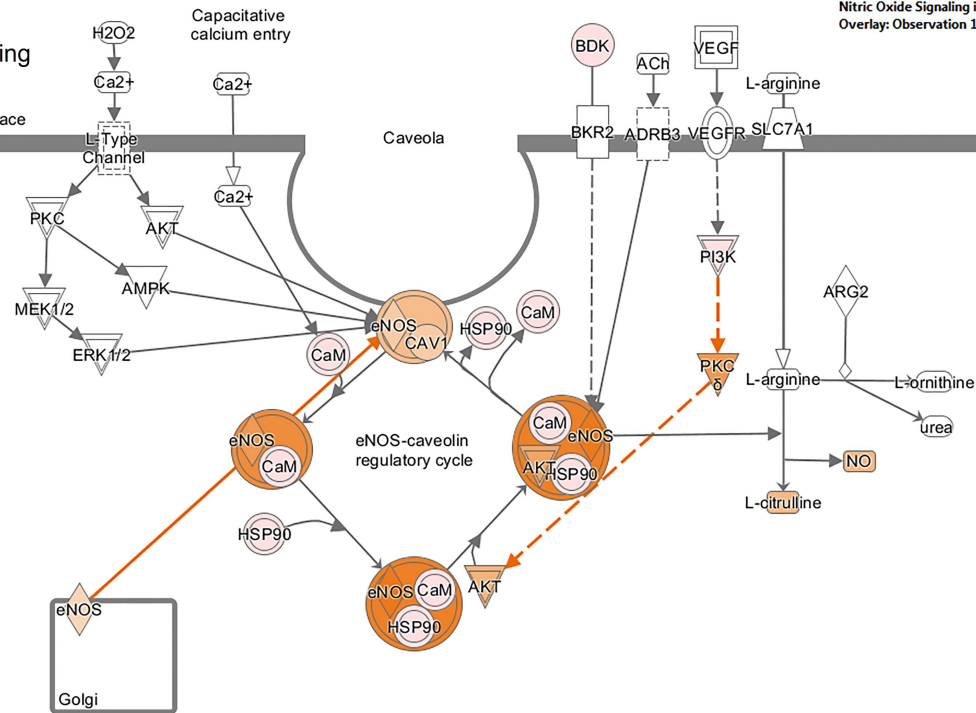

Nitric Oxide Signaling in the Cardiovascular System  
Overlay: Observation 1, Exp Fold Change

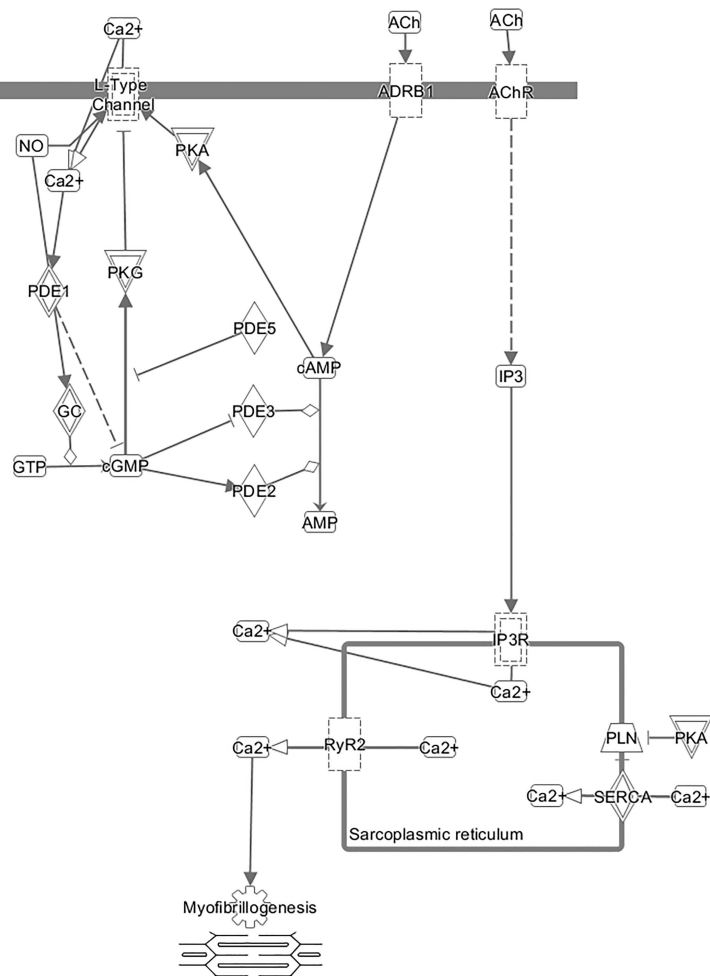

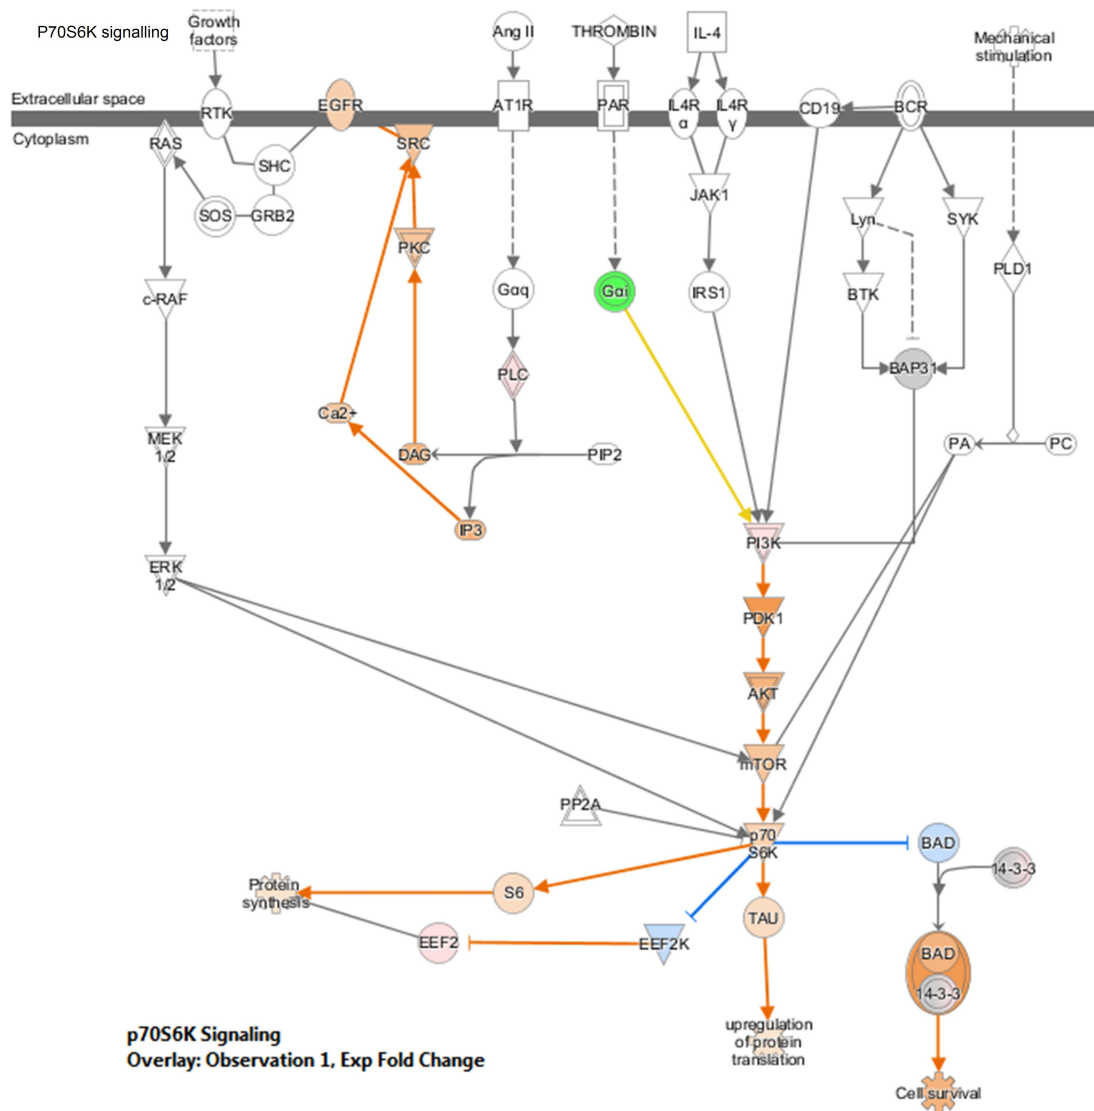

# RhoGDI Signaling

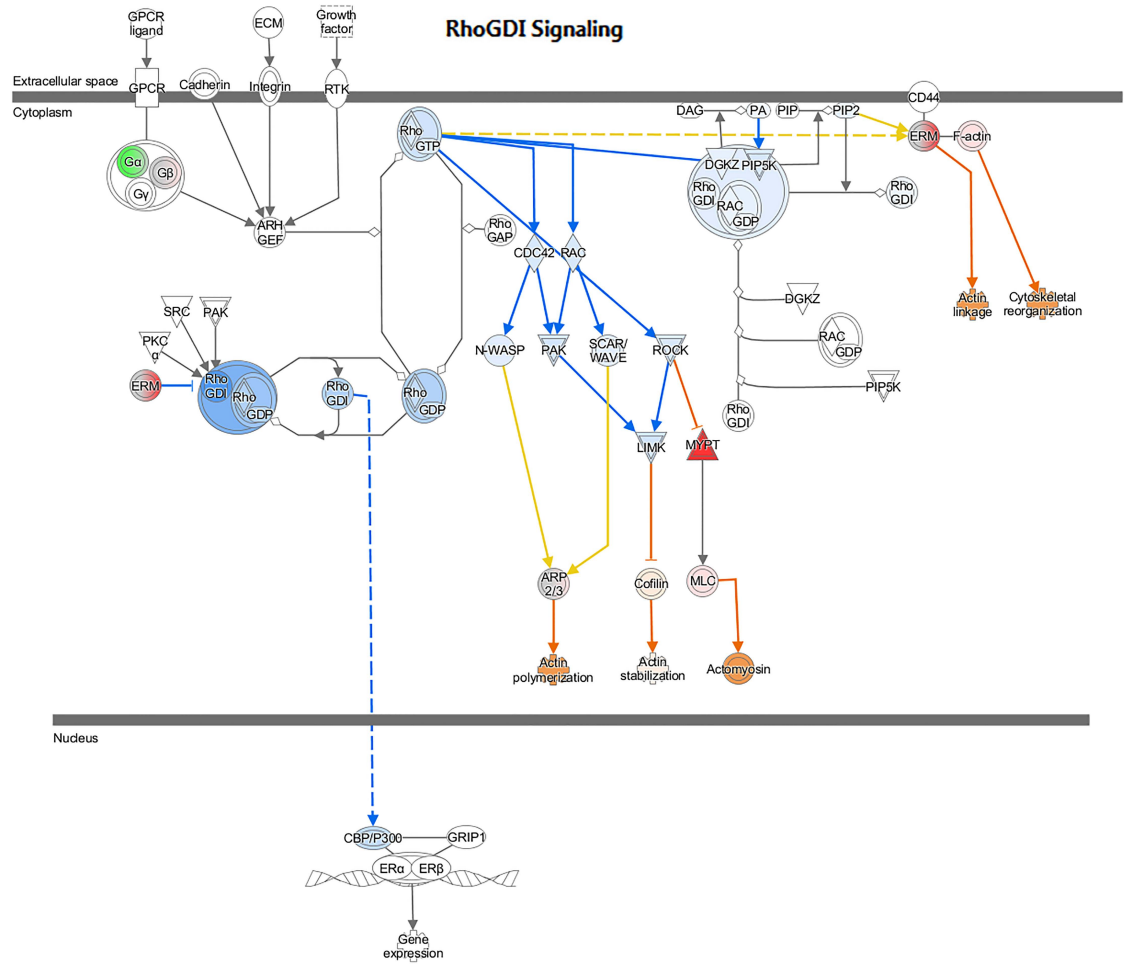

# Thrombin signalling

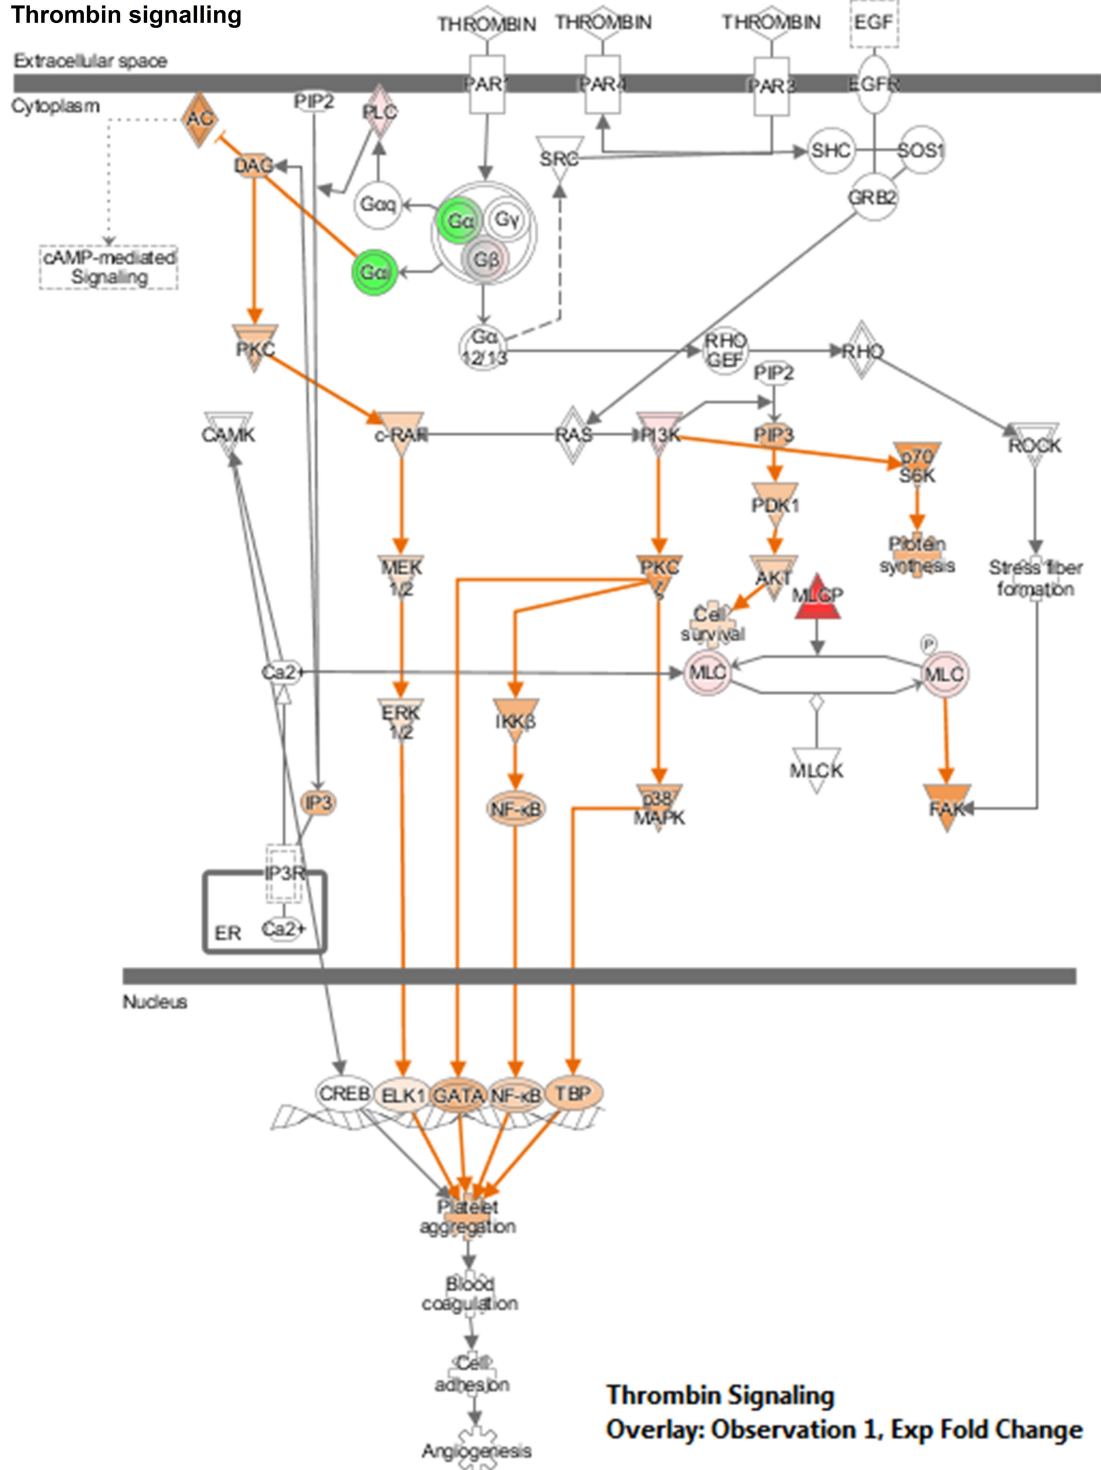

# VEGF Signaling

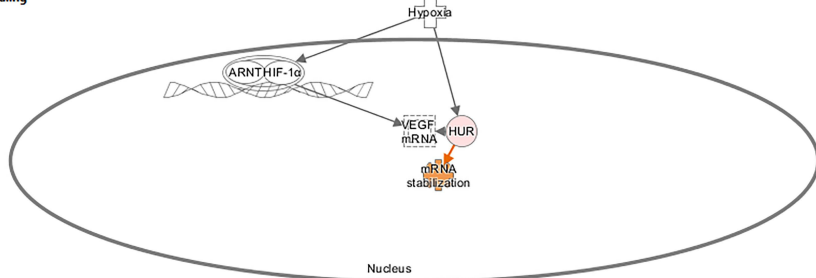

Cytoplasm

VEGF-producing cell

Extracellular space

Cytoplasm

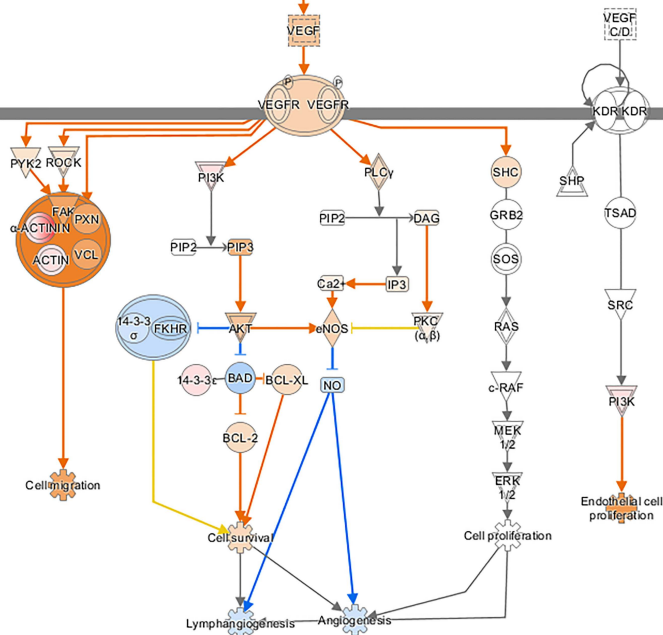

**Supernatant acute phase signaling,  
significantly modulated in ESPs, post caerin 1.9 treatment**

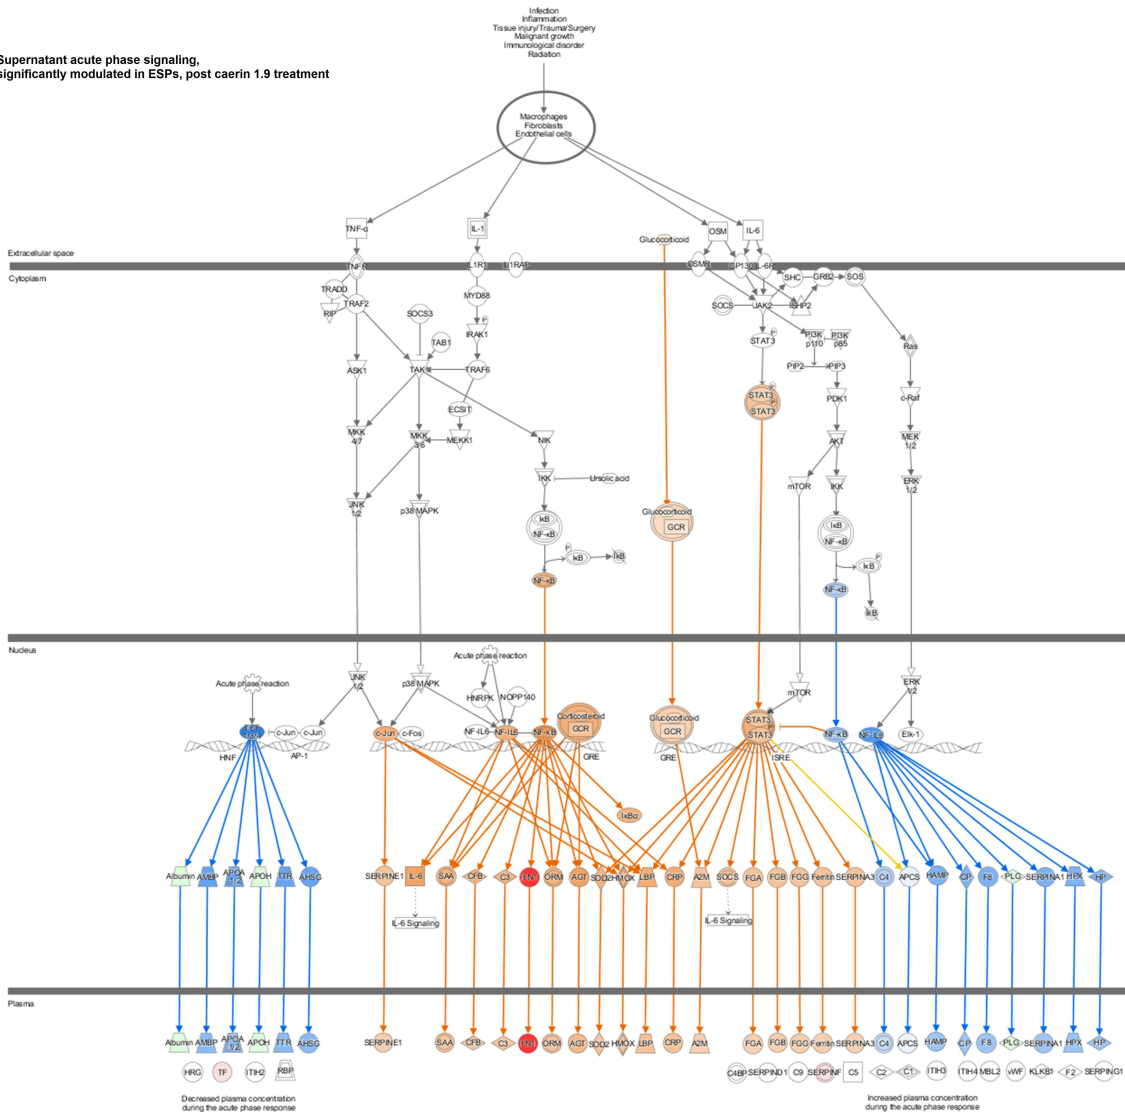

Supplement: f1 [file 7382351.f1.zip]
