# Supplementary material for: Comparative Proteomic Study of the Antiproliferative Activity of Frog Host-Defence Peptide Caerin 1.9 and Its Additive Effect with Caerin 1.1 on TC-1 Cells Transformed with HPV16 E6 and E7
Source: Biomed Res Int. 2018 May 13;2018:7382351. doi: 10.1155/2018/7382351 (PMC5971270; doi:10.1155/2018/7382351)
Supplement: Supplementary Materials — Figure S1: caerin 1.1 and caerin 1.9 are able to inhibit the proliferation of HeLa cells but not HMC cells, measured by MTT assay. 1 × 105 of HeLa cells or 1 × 105 of HMC cells was cultured either in media, or plus different concentrations (25, 20, 15, 10, and 5 μg/ml) of caerin 1.1, caerin 1.9, the mixture of 1.1 and 1.9 (mass ratio 1 : 1) or P3 for 24 hours before MTT assay was performed. (A) Caerin 1.1 treated HeLa cells, (B) caerin 1.9 treated HeLa cells, (C) the mixture treated HeLa cells, (D) P3 treated HeLa cells, (E) caerin 1.1 treated HMC cells, (F) caerin 1.9 treated HMC, (G) the mixture treated HMC cells, and (H) P3 treated HMC cells. Each bar represents the statistical mean from three biological replicates (performed in triplicate) and the error bars represent the standard deviation. Figure S2: probabilistic PCA is used to calculate principal components. x and y-axes show principal component 1 and principal component 2 that explain 68.8% and 19.5% of the total variance, respectively. N = 9 data points. Figure S3: heatmap of differentially expressed proteins in TC-1 cells identified from iTRAQ analysis of the first biological replicate treated with caerin 1.9 and the mixture (caerin 1.9 plus caerin 1.1 at a mass ratio of 1 : 1) at 24 h and untreated cells as control. The figure was generated using PEAKS studio. The decreased and increased proteins are indicated by range of green and red intensities, respectively. Figure S4: heatmap of differentially expressed proteins in TC-1 cells identified from iTRAQ analysis of the second biological replicate treated with caerin 1.9 and the mixture (caerin 1.9 plus caerin 1.1 at a mass ratio of 1 : 1) at 24 h and untreated cells as control. The figure was generated using PEAKS studio. The decreased and increased proteins are indicated by range of green and red intensities, respectively. Figure S5: heatmap of differentially expressed proteins in TC-1 cells identified from iTRAQ analysis of the third biological replicat [file 7382351.f1.zip › S1 Table cell protein identification & quantitation.xlsx]

## Sheet: Rep_1_all_proteins
Accession	-10lgP	Coverage (%)	#Peptides	#Unique	PTM	Avg. Mass	Description
sp|P60709|ACTB_HUMAN	284.61	60	23	6	Carbamidomethylation; Oxidation (M); Pyro-glu from Q; iTRAQ 4plex (K N-term); iTRAQ 4plex (Y)	41737	Actin cytoplasmic 1 OS=Homo sapiens GN=ACTB PE=1 SV=1
sp|P63261|ACTG_HUMAN	284.61	60	23	6	Carbamidomethylation; Oxidation (M); Pyro-glu from Q; iTRAQ 4plex (K N-term); iTRAQ 4plex (Y)	41793	Actin cytoplasmic 2 OS=Homo sapiens GN=ACTG1 PE=1 SV=1
sp|P08670|VIME_HUMAN	264.61	59	29	28	Carbamidomethylation; Deamidation (NQ); Pyro-glu from Q; iTRAQ 4plex (K N-term); iTRAQ 4plex (Y)	53652	Vimentin OS=Homo sapiens GN=VIM PE=1 SV=4
tr|B0YJC4|B0YJC4_HUMAN	263.99	64	29	28	Carbamidomethylation; Deamidation (NQ); Pyro-glu from Q; iTRAQ 4plex (K N-term); iTRAQ 4plex (Y)	49653	Vimentin OS=Homo sapiens GN=VIM PE=1 SV=1
sp|P11142|HSP7C_HUMAN	259.1	51	29	24	Deamidation (NQ); iTRAQ 4plex (K N-term); iTRAQ 4plex (Y)	70898	Heat shock cognate 71 kDa protein OS=Homo sapiens GN=HSPA8 PE=1 SV=1
tr|E9PKE3|E9PKE3_HUMAN	253.77	49	28	23	Deamidation (NQ); iTRAQ 4plex (K N-term); iTRAQ 4plex (Y)	68806	Heat shock cognate 71 kDa protein OS=Homo sapiens GN=HSPA8 PE=1 SV=1
sp|P35579|MYH9_HUMAN	249.44	12	17	13	Deamidation (NQ); Pyro-glu from Q; iTRAQ 4plex (K N-term)	226530	Myosin-9 OS=Homo sapiens GN=MYH9 PE=1 SV=4
sp|P08238|HS90B_HUMAN	246.73	37	27	12	Carbamidomethylation; Deamidation (NQ); iTRAQ 4plex (K N-term); iTRAQ 4plex (Y)	83264	Heat shock protein HSP 90-beta OS=Homo sapiens GN=HSP90AB1 PE=1 SV=4
sp|P10809|CH60_HUMAN	243.73	27	15	15	Oxidation (M); iTRAQ 4plex (K N-term)	61055	60 kDa heat shock protein mitochondrial OS=Homo sapiens GN=HSPD1 PE=1 SV=2
tr|I3L4N8|I3L4N8_HUMAN	241.24	60	15	4	Carbamidomethylation; Oxidation (M); iTRAQ 4plex (K N-term); iTRAQ 4plex (Y)	26935	Actin cytoplasmic 2 (Fragment) OS=Homo sapiens GN=ACTG1 PE=1 SV=7
sp|P06733|ENOA_HUMAN	239.45	51	18	14	Carbamidomethylation; Deamidation (NQ); Oxidation (M); iTRAQ 4plex (K N-term); iTRAQ 4plex (Y)	47169	Alpha-enolase OS=Homo sapiens GN=ENO1 PE=1 SV=2
sp|P68104|EF1A1_HUMAN	238.86	45	18	8	Carbamidomethylation; Deamidation (NQ); Oxidation (M); Pyro-glu from Q; iTRAQ 4plex (K N-term); iTRAQ 4plex (Y)	50141	Elongation factor 1-alpha 1 OS=Homo sapiens GN=EEF1A1 PE=1 SV=1
sp|Q5VTE0|EF1A3_HUMAN	238.86	45	18	8	Carbamidomethylation; Deamidation (NQ); Oxidation (M); Pyro-glu from Q; iTRAQ 4plex (K N-term); iTRAQ 4plex (Y)	50185	Putative elongation factor 1-alpha-like 3 OS=Homo sapiens GN=EEF1A1P5 PE=5 SV=1
tr|I3L3I0|I3L3I0_HUMAN	235.59	62	15	4	Oxidation (M); iTRAQ 4plex (K N-term); iTRAQ 4plex (Y)	23845	Actin cytoplasmic 2 (Fragment) OS=Homo sapiens GN=ACTG1 PE=1 SV=1
tr|I3L1U9|I3L1U9_HUMAN	235.59	62	15	4	Oxidation (M); iTRAQ 4plex (K N-term); iTRAQ 4plex (Y)	23845	Actin cytoplasmic 2 (Fragment) OS=Homo sapiens GN=ACTG1 PE=1 SV=1
sp|Q9BQE3|TBA1C_HUMAN	232.36	41	15	1	iTRAQ 4plex (K N-term)	49895	Tubulin alpha-1C chain OS=Homo sapiens GN=TUBA1C PE=1 SV=1
sp|P68363|TBA1B_HUMAN	232.36	41	15	1	iTRAQ 4plex (K N-term)	50152	Tubulin alpha-1B chain OS=Homo sapiens GN=TUBA1B PE=1 SV=1
tr|F5H5D3|F5H5D3_HUMAN	232.36	35	15	1	iTRAQ 4plex (K N-term)	57730	Tubulin alpha-1C chain OS=Homo sapiens GN=TUBA1C PE=1 SV=1
sp|P13639|EF2_HUMAN	229.81	31	21	21	Carbamidomethylation; iTRAQ 4plex (K N-term); iTRAQ 4plex (Y)	95338	Elongation factor 2 OS=Homo sapiens GN=EEF2 PE=1 SV=4
sp|Q71U36|TBA1A_HUMAN	229.16	41	15	1	iTRAQ 4plex (K N-term)	50136	Tubulin alpha-1A chain OS=Homo sapiens GN=TUBA1A PE=1 SV=1
tr|E9PNE6|E9PNE6_HUMAN	227.58	44	19	14	Deamidation (NQ); iTRAQ 4plex (K N-term)	54976	Heat shock cognate 71 kDa protein OS=Homo sapiens GN=HSPA8 PE=1 SV=1
tr|Q5HY54|Q5HY54_HUMAN	227.32	11	19	16	iTRAQ 4plex (K N-term); iTRAQ 4plex (Y)	276548	Filamin-A OS=Homo sapiens GN=FLNA PE=1 SV=1
tr|Q60FE5|Q60FE5_HUMAN	227.32	11	19	16	iTRAQ 4plex (K N-term); iTRAQ 4plex (Y)	278224	Filamin A OS=Homo sapiens GN=FLNA PE=1 SV=1
sp|P21333|FLNA_HUMAN	227.32	10	19	16	iTRAQ 4plex (K N-term); iTRAQ 4plex (Y)	280737	Filamin-A OS=Homo sapiens GN=FLNA PE=1 SV=4
tr|A0A087WV01|A0A087WV01_HUMAN	225.64	39	15	7	Carbamidomethylation; Deamidation (NQ); Oxidation (M); Pyro-glu from Q; iTRAQ 4plex (K N-term); iTRAQ 4plex (Y)	46360	Elongation factor 1-alpha OS=Homo sapiens GN=EEF1A1 PE=1 SV=1
sp|P07900|HS90A_HUMAN	223.47	29	21	7	Carbamidomethylation; Deamidation (NQ); iTRAQ 4plex (K N-term); iTRAQ 4plex (Y)	84660	Heat shock protein HSP 90-alpha OS=Homo sapiens GN=HSP90AA1 PE=1 SV=5
tr|E9PN89|E9PN89_HUMAN	222.74	63	18	18	iTRAQ 4plex (K N-term); iTRAQ 4plex (Y)	34819	Heat shock cognate 71 kDa protein (Fragment) OS=Homo sapiens GN=HSPA8 PE=1 SV=1
tr|A0A087WVQ9|A0A087WVQ9_HUMAN	222.56	42	15	7	Carbamidomethylation; Deamidation (NQ); Oxidation (M); Pyro-glu from Q; iTRAQ 4plex (K N-term); iTRAQ 4plex (Y)	47883	Elongation factor 1-alpha 1 OS=Homo sapiens GN=EEF1A1 PE=1 SV=1
sp|P11021|GRP78_HUMAN	220.05	34	20	18	iTRAQ 4plex (K N-term)	72333	78 kDa glucose-regulated protein OS=Homo sapiens GN=HSPA5 PE=1 SV=2
sp|P68032|ACTC_HUMAN	216.65	33	16	1	Oxidation (M); iTRAQ 4plex (K N-term); iTRAQ 4plex (Y)	42019	Actin alpha cardiac muscle 1 OS=Homo sapiens GN=ACTC1 PE=1 SV=1
sp|P68133|ACTS_HUMAN	216.65	33	16	1	Oxidation (M); iTRAQ 4plex (K N-term); iTRAQ 4plex (Y)	42051	Actin alpha skeletal muscle OS=Homo sapiens GN=ACTA1 PE=1 SV=1
sp|P02545|LMNA_HUMAN	216.48	35	21	21	Deamidation (NQ); iTRAQ 4plex (K N-term)	74140	Prelamin-A/C OS=Homo sapiens GN=LMNA PE=1 SV=1
sp|Q13748|TBA3C_HUMAN	216.34	35	13	1	iTRAQ 4plex (K N-term)	49960	Tubulin alpha-3C/D chain OS=Homo sapiens GN=TUBA3C PE=1 SV=3
tr|Q5JP53|Q5JP53_HUMAN	215.41	46	17	17	Deamidation (NQ); iTRAQ 4plex (K N-term); iTRAQ 4plex (Y)	47767	Tubulin beta chain OS=Homo sapiens GN=TUBB PE=1 SV=1
sp|P07437|TBB5_HUMAN	215.41	44	17	17	Deamidation (NQ); iTRAQ 4plex (K N-term); iTRAQ 4plex (Y)	49671	Tubulin beta chain OS=Homo sapiens GN=TUBB PE=1 SV=2
sp|P25705|ATPA_HUMAN	214.41	26	13	13	iTRAQ 4plex (K N-term)	59751	ATP synthase subunit alpha mitochondrial OS=Homo sapiens GN=ATP5A1 PE=1 SV=1
tr|H3BTN5|H3BTN5_HUMAN	213.93	33	15	15	Deamidation (NQ); Oxidation (M); Pyro-glu from Q; iTRAQ 4plex (K N-term); iTRAQ 4plex (Y)	53045	Pyruvate kinase (Fragment) OS=Homo sapiens GN=PKM PE=1 SV=1
sp|P14618|KPYM_HUMAN	213.93	31	15	15	Deamidation (NQ); Oxidation (M); Pyro-glu from Q; iTRAQ 4plex (K N-term); iTRAQ 4plex (Y)	57937	Pyruvate kinase PKM OS=Homo sapiens GN=PKM PE=1 SV=4
tr|E7EXB4|E7EXB4_HUMAN	212.32	40	7	7	Oxidation (M); iTRAQ 4plex (K N-term)	23783	60 kDa heat shock protein mitochondrial (Fragment) OS=Homo sapiens GN=HSPD1 PE=1 SV=1
tr|E7ESH4|E7ESH4_HUMAN	212.32	38	7	7	Oxidation (M); iTRAQ 4plex (K N-term)	25226	60 kDa heat shock protein mitochondrial (Fragment) OS=Homo sapiens GN=HSPD1 PE=1 SV=1
tr|Q3BDU5|Q3BDU5_HUMAN	212.29	40	19	19	iTRAQ 4plex (K N-term)	55638	Prelamin-A/C OS=Homo sapiens GN=LMNA PE=1 SV=1
tr|A0A087WWY3|A0A087WWY3_HUMAN	212.22	10	16	14	iTRAQ 4plex (K N-term); iTRAQ 4plex (Y)	245848	Filamin-A OS=Homo sapiens GN=FLNA PE=1 SV=1
sp|P63267|ACTH_HUMAN	211.94	31	15	1	Oxidation (M); iTRAQ 4plex (K N-term); iTRAQ 4plex (Y)	41877	Actin gamma-enteric smooth muscle OS=Homo sapiens GN=ACTG2 PE=1 SV=1
sp|P62736|ACTA_HUMAN	211.94	31	15	1	Oxidation (M); iTRAQ 4plex (K N-term); iTRAQ 4plex (Y)	42009	Actin aortic smooth muscle OS=Homo sapiens GN=ACTA2 PE=1 SV=1
tr|E9PK54|E9PK54_HUMAN	211.03	74	14	11	iTRAQ 4plex (K N-term); iTRAQ 4plex (Y)	20013	Heat shock cognate 71 kDa protein (Fragment) OS=Homo sapiens GN=HSPA8 PE=1 SV=7
tr|E9PQQ4|E9PQQ4_HUMAN	211.03	80	14	11	iTRAQ 4plex (K N-term); iTRAQ 4plex (Y)	18727	Heat shock cognate 71 kDa protein (Fragment) OS=Homo sapiens GN=HSPA8 PE=1 SV=1
tr|E9PLF4|E9PLF4_HUMAN	211.03	73	14	11	iTRAQ 4plex (K N-term); iTRAQ 4plex (Y)	20369	Heat shock cognate 71 kDa protein (Fragment) OS=Homo sapiens GN=HSPA8 PE=1 SV=1
tr|E9PQK7|E9PQK7_HUMAN	211.03	77	14	11	iTRAQ 4plex (K N-term); iTRAQ 4plex (Y)	19466	Heat shock cognate 71 kDa protein (Fragment) OS=Homo sapiens GN=HSPA8 PE=1 SV=1
sp|P14625|ENPL_HUMAN	209.08	26	21	18	iTRAQ 4plex (K N-term)	92469	Endoplasmin OS=Homo sapiens GN=HSP90B1 PE=1 SV=1
sp|Q6PEY2|TBA3E_HUMAN	208.73	32	10	1	iTRAQ 4plex (K N-term)	49859	Tubulin alpha-3E chain OS=Homo sapiens GN=TUBA3E PE=1 SV=2
tr|B4DNK4|B4DNK4_HUMAN	207.85	28	12	12	Deamidation (NQ); Oxidation (M); Pyro-glu from Q; iTRAQ 4plex (K N-term)	49898	Pyruvate kinase OS=Homo sapiens GN=PKM PE=1 SV=1
tr|F8VVB9|F8VVB9_HUMAN	205.37	46	8	1	iTRAQ 4plex (K N-term)	27552	Tubulin alpha-1B chain (Fragment) OS=Homo sapiens GN=TUBA1B PE=1 SV=7
sp|Q58FF7|H90B3_HUMAN	203.4	22	14	6	iTRAQ 4plex (K N-term); iTRAQ 4plex (Y)	68325	Putative heat shock protein HSP 90-beta-3 OS=Homo sapiens GN=HSP90AB3P PE=5 SV=1
sp|P00338|LDHA_HUMAN	201.27	31	11	8	Carbamidomethylation; iTRAQ 4plex (K N-term); iTRAQ 4plex (Y)	36689	L-lactate dehydrogenase A chain OS=Homo sapiens GN=LDHA PE=1 SV=2
tr|Q5ST81|Q5ST81_HUMAN	199.7	45	15	15	Deamidation (NQ); iTRAQ 4plex (K N-term); iTRAQ 4plex (Y)	41742	Tubulin beta chain OS=Homo sapiens GN=TUBB PE=1 SV=1
tr|A8K7Q2|A8K7Q2_HUMAN	197.46	39	13	11	Deamidation (NQ); iTRAQ 4plex (K N-term)	45338	Heat shock cognate 71 kDa protein OS=Homo sapiens GN=HSPA8 PE=1 SV=1
tr|B0YJC5|B0YJC5_HUMAN	197.14	64	13	12	Carbamidomethylation; Deamidation (NQ); Pyro-glu from Q; iTRAQ 4plex (K N-term); iTRAQ 4plex (Y)	26859	Vimentin OS=Homo sapiens GN=VIM PE=1 SV=1
sp|P68366|TBA4A_HUMAN	196.94	29	11	1	iTRAQ 4plex (K N-term)	49924	Tubulin alpha-4A chain OS=Homo sapiens GN=TUBA4A PE=1 SV=1
tr|A6NL76|A6NL76_HUMAN	194.44	38	13	1	Oxidation (M); iTRAQ 4plex (K N-term); iTRAQ 4plex (Y)	28165	Actin alpha skeletal muscle OS=Homo sapiens GN=ACTA1 PE=1 SV=3
tr|E9PPY6|E9PPY6_HUMAN	194.21	78	12	9	iTRAQ 4plex (K N-term); iTRAQ 4plex (Y)	15153	Heat shock cognate 71 kDa protein (Fragment) OS=Homo sapiens GN=HSPA8 PE=1 SV=1
tr|I3L3R2|I3L3R2_HUMAN	193.65	48	10	1	Oxidation (M); iTRAQ 4plex (K N-term); iTRAQ 4plex (Y)	18032	Actin cytoplasmic 2 (Fragment) OS=Homo sapiens GN=ACTG1 PE=1 SV=1
tr|E7EVS6|E7EVS6_HUMAN	193.65	48	10	1	Oxidation (M); iTRAQ 4plex (K N-term); iTRAQ 4plex (Y)	17975	Actin cytoplasmic 1 (Fragment) OS=Homo sapiens GN=ACTB PE=1 SV=7
tr|G5E9R0|G5E9R0_HUMAN	193.65	63	10	1	Oxidation (M); iTRAQ 4plex (K N-term); iTRAQ 4plex (Y)	13859	Actin cytoplasmic 1 OS=Homo sapiens GN=ACTB PE=1 SV=1
tr|K7EM38|K7EM38_HUMAN	193.65	59	10	1	Oxidation (M); iTRAQ 4plex (K N-term); iTRAQ 4plex (Y)	14522	Actin cytoplasmic 2 (Fragment) OS=Homo sapiens GN=ACTG1 PE=1 SV=1
tr|J3KT65|J3KT65_HUMAN	193.65	40	10	1	Oxidation (M); iTRAQ 4plex (K N-term); iTRAQ 4plex (Y)	21804	Actin cytoplasmic 2 OS=Homo sapiens GN=ACTG1 PE=1 SV=1
tr|Q5TCI8|Q5TCI8_HUMAN	193.61	29	13	13	iTRAQ 4plex (K N-term)	55762	Prelamin-A/C OS=Homo sapiens GN=LMNA PE=1 SV=1
sp|P62805|H4_HUMAN	192.82	59	12	12	iTRAQ 4plex (K N-term); iTRAQ 4plex (Y)	11367	Histone H4 OS=Homo sapiens GN=HIST1H4A PE=1 SV=2
sp|Q9NY65|TBA8_HUMAN	189.2	27	9	1	iTRAQ 4plex (K N-term)	50094	Tubulin alpha-8 chain OS=Homo sapiens GN=TUBA8 PE=1 SV=1
tr|C9J2C0|C9J2C0_HUMAN	189.2	26	9	1	iTRAQ 4plex (K N-term)	51985	Tubulin alpha-8 chain (Fragment) OS=Homo sapiens GN=TUBA8 PE=1 SV=1
tr|E9PI65|E9PI65_HUMAN	188.03	61	9	6	iTRAQ 4plex (K N-term); iTRAQ 4plex (Y)	17916	Heat shock cognate 71 kDa protein (Fragment) OS=Homo sapiens GN=HSPA8 PE=1 SV=1
sp|P00558|PGK1_HUMAN	187.22	34	13	13	Deamidation (NQ); Oxidation (M); Pyro-glu from Q; iTRAQ 4plex (K N-term)	44615	Phosphoglycerate kinase 1 OS=Homo sapiens GN=PGK1 PE=1 SV=3
sp|P55072|TERA_HUMAN	185.99	19	12	12	Deamidation (NQ); Oxidation (M); iTRAQ 4plex (K N-term)	89322	Transitional endoplasmic reticulum ATPase OS=Homo sapiens GN=VCP PE=1 SV=4
tr|F8VQQ4|F8VQQ4_HUMAN	184.69	46	9	1	iTRAQ 4plex (K N-term)	24221	Tubulin alpha-1A chain (Fragment) OS=Homo sapiens GN=TUBA1A PE=1 SV=1
sp|P68371|TBB4B_HUMAN	183.81	31	13	13	iTRAQ 4plex (K N-term); iTRAQ 4plex (Y)	49831	Tubulin beta-4B chain OS=Homo sapiens GN=TUBB4B PE=1 SV=1
tr|E9PN25|E9PN25_HUMAN	183.39	73	10	7	iTRAQ 4plex (K N-term); iTRAQ 4plex (Y)	14621	Heat shock cognate 71 kDa protein (Fragment) OS=Homo sapiens GN=HSPA8 PE=1 SV=1
sp|Q13885|TBB2A_HUMAN	182.99	29	12	12	iTRAQ 4plex (K N-term)	49907	Tubulin beta-2A chain OS=Homo sapiens GN=TUBB2A PE=1 SV=1
sp|Q9BVA1|TBB2B_HUMAN	182.99	29	12	12	iTRAQ 4plex (K N-term)	49953	Tubulin beta-2B chain OS=Homo sapiens GN=TUBB2B PE=1 SV=1
sp|Q99880|H2B1L_HUMAN	182.27	63	11	1	Deamidation (NQ); Oxidation (M); Pyro-glu from Q; iTRAQ 4plex (K N-term); iTRAQ 4plex (Y)	13952	Histone H2B type 1-L OS=Homo sapiens GN=HIST1H2BL PE=1 SV=3
tr|H3BR70|H3BR70_HUMAN	181.58	22	8	8	Oxidation (M); Pyro-glu from Q; iTRAQ 4plex (K N-term)	40190	Pyruvate kinase OS=Homo sapiens GN=PKM PE=1 SV=1
sp|P60842|IF4A1_HUMAN	181.12	41	11	11	iTRAQ 4plex (K N-term)	46154	Eukaryotic initiation factor 4A-I OS=Homo sapiens GN=EIF4A1 PE=1 SV=1
sp|P13929|ENOB_HUMAN	177.96	26	7	3	Carbamidomethylation; Deamidation (NQ); iTRAQ 4plex (K N-term)	46987	Beta-enolase OS=Homo sapiens GN=ENO3 PE=1 SV=5
tr|H3BQN4|H3BQN4_HUMAN	177.6	30	11	9	iTRAQ 4plex (K N-term); iTRAQ 4plex (Y)	39340	Fructose-bisphosphate aldolase OS=Homo sapiens GN=ALDOA PE=1 SV=1
sp|P04075|ALDOA_HUMAN	177.6	30	11	9	iTRAQ 4plex (K N-term); iTRAQ 4plex (Y)	39420	Fructose-bisphosphate aldolase A OS=Homo sapiens GN=ALDOA PE=1 SV=2
tr|J3KPS3|J3KPS3_HUMAN	177.6	29	11	9	iTRAQ 4plex (K N-term); iTRAQ 4plex (Y)	39818	Fructose-bisphosphate aldolase OS=Homo sapiens GN=ALDOA PE=1 SV=1
tr|H3BQ34|H3BQ34_HUMAN	176.37	37	9	9	Deamidation (NQ); Oxidation (M); iTRAQ 4plex (K N-term); iTRAQ 4plex (Y)	30720	Pyruvate kinase OS=Homo sapiens GN=PKM PE=1 SV=1
sp|Q58FF8|H90B2_HUMAN	174.87	23	10	2	Deamidation (NQ); iTRAQ 4plex (K N-term); iTRAQ 4plex (Y)	44349	Putative heat shock protein HSP 90-beta 2 OS=Homo sapiens GN=HSP90AB2P PE=1 SV=2
tr|Q5JR01|Q5JR01_HUMAN	174.61	55	6	1	Carbamidomethylation; iTRAQ 4plex (K N-term); iTRAQ 4plex (Y)	15936	Elongation factor 1-alpha 1 (Fragment) OS=Homo sapiens GN=EEF1A1 PE=1 SV=1
tr|F8WB63|F8WB63_HUMAN	173.73	63	9	1	Oxidation (M); iTRAQ 4plex (K N-term); iTRAQ 4plex (Y)	11403	Actin gamma-enteric smooth muscle OS=Homo sapiens GN=ACTG2 PE=1 SV=1
tr|F6UVQ4|F6UVQ4_HUMAN	173.73	44	9	1	Oxidation (M); iTRAQ 4plex (K N-term); iTRAQ 4plex (Y)	16759	Actin aortic smooth muscle (Fragment) OS=Homo sapiens GN=ACTA2 PE=1 SV=1
tr|F6QUT6|F6QUT6_HUMAN	173.73	44	9	1	Oxidation (M); iTRAQ 4plex (K N-term); iTRAQ 4plex (Y)	16759	Actin aortic smooth muscle (Fragment) OS=Homo sapiens GN=ACTA2 PE=1 SV=1
tr|B8ZZJ2|B8ZZJ2_HUMAN	173.73	55	9	1	Oxidation (M); iTRAQ 4plex (K N-term); iTRAQ 4plex (Y)	12969	Actin gamma-enteric smooth muscle OS=Homo sapiens GN=ACTG2 PE=1 SV=1
tr|C9JFL5|C9JFL5_HUMAN	173.73	46	9	1	Oxidation (M); iTRAQ 4plex (K N-term); iTRAQ 4plex (Y)	16271	Actin gamma-enteric smooth muscle (Fragment) OS=Homo sapiens GN=ACTG2 PE=1 SV=7
tr|H3BPS8|H3BPS8_HUMAN	172.63	36	10	8	iTRAQ 4plex (K N-term); iTRAQ 4plex (Y)	30427	Fructose-bisphosphate aldolase A (Fragment) OS=Homo sapiens GN=ALDOA PE=1 SV=1
sp|P16403|H12_HUMAN	172.5	28	8	4	iTRAQ 4plex (K N-term); iTRAQ 4plex (Y)	21365	Histone H1.2 OS=Homo sapiens GN=HIST1H1C PE=1 SV=2
sp|P10412|H14_HUMAN	172.5	27	8	4	iTRAQ 4plex (K N-term); iTRAQ 4plex (Y)	21865	Histone H1.4 OS=Homo sapiens GN=HIST1H1E PE=1 SV=2
sp|P54652|HSP72_HUMAN	170.85	16	11	6	iTRAQ 4plex (K N-term); iTRAQ 4plex (Y)	70021	Heat shock-related 70 kDa protein 2 OS=Homo sapiens GN=HSPA2 PE=1 SV=1
tr|C9JL25|C9JL25_HUMAN	170.21	37	4	4	Oxidation (M); iTRAQ 4plex (K N-term)	19207	60 kDa heat shock protein mitochondrial (Fragment) OS=Homo sapiens GN=HSPD1 PE=1 SV=1
sp|P05141|ADT2_HUMAN	169.66	39	13	3	iTRAQ 4plex (K N-term); iTRAQ 4plex (Y)	32852	ADP/ATP translocase 2 OS=Homo sapiens GN=SLC25A5 PE=1 SV=7
sp|P16402|H13_HUMAN	167.31	23	7	4	iTRAQ 4plex (K N-term); iTRAQ 4plex (Y)	22350	Histone H1.3 OS=Homo sapiens GN=HIST1H1D PE=1 SV=2
sp|Q09666|AHNK_HUMAN	167.2	2	10	10	iTRAQ 4plex (K N-term)	629114	Neuroblast differentiation-associated protein AHNAK OS=Homo sapiens GN=AHNAK PE=1 SV=2
tr|Q96GW1|Q96GW1_HUMAN	166.51	38	11	8	iTRAQ 4plex (K N-term)	35450	Endoplasmin OS=Homo sapiens GN=HSP90B1 PE=1 SV=1
sp|P33778|H2B1B_HUMAN	165.93	62	10	1	Deamidation (NQ); Oxidation (M); Pyro-glu from Q; iTRAQ 4plex (K N-term)	13950	Histone H2B type 1-B OS=Homo sapiens GN=HIST1H2BB PE=1 SV=2
sp|Q96QV6|H2A1A_HUMAN	165.48	35	7	2	iTRAQ 4plex (K N-term)	14233	Histone H2A type 1-A OS=Homo sapiens GN=HIST1H2AA PE=1 SV=3
sp|P16104|H2AX_HUMAN	165.48	32	7	2	iTRAQ 4plex (K N-term)	15145	Histone H2AX OS=Homo sapiens GN=H2AFX PE=1 SV=2
tr|K7EM90|K7EM90_HUMAN	165.2	36	8	6	iTRAQ 4plex (K N-term); iTRAQ 4plex (Y)	21020	Alpha-enolase (Fragment) OS=Homo sapiens GN=ENO1 PE=1 SV=1
sp|Q13509|TBB3_HUMAN	164.6	21	9	9	iTRAQ 4plex (K N-term)	50433	Tubulin beta-3 chain OS=Homo sapiens GN=TUBB3 PE=1 SV=2
tr|A0A0B4J269|A0A0B4J269_HUMAN	164.6	12	9	9	iTRAQ 4plex (K N-term)	88382	Uncharacterized protein OS=Homo sapiens PE=1 SV=1
tr|F5GXY2|F5GXY2_HUMAN	164.43	45	8	5	Carbamidomethylation; iTRAQ 4plex (K N-term)	17415	L-lactate dehydrogenase A chain (Fragment) OS=Homo sapiens GN=LDHA PE=1 SV=7
sp|P62937|PPIA_HUMAN	163.33	40	11	10	iTRAQ 4plex (K N-term)	18012	Peptidyl-prolyl cis-trans isomerase A OS=Homo sapiens GN=PPIA PE=1 SV=2
sp|P04350|TBB4A_HUMAN	162.23	22	10	10	iTRAQ 4plex (K N-term); iTRAQ 4plex (Y)	49586	Tubulin beta-4A chain OS=Homo sapiens GN=TUBB4A PE=1 SV=2
sp|Q8N257|H2B3B_HUMAN	161.38	50	8	1	Deamidation (NQ); Oxidation (M); Pyro-glu from Q; iTRAQ 4plex (K N-term)	13908	Histone H2B type 3-B OS=Homo sapiens GN=HIST3H2BB PE=1 SV=3
sp|P06748|NPM_HUMAN	160.82	31	9	8	Deamidation (NQ); Oxidation (M); iTRAQ 4plex (K N-term)	32575	Nucleophosmin OS=Homo sapiens GN=NPM1 PE=1 SV=2
sp|Q8IUE6|H2A2B_HUMAN	160.55	30	6	2	iTRAQ 4plex (K N-term)	13995	Histone H2A type 2-B OS=Homo sapiens GN=HIST2H2AB PE=1 SV=3
sp|P26038|MOES_HUMAN	159.17	21	12	8	Pyro-glu from Q; iTRAQ 4plex (K N-term); iTRAQ 4plex (Y)	67820	Moesin OS=Homo sapiens GN=MSN PE=1 SV=3
sp|Q562R1|ACTBL_HUMAN	158.78	15	7	1	Oxidation (M); iTRAQ 4plex (K N-term); iTRAQ 4plex (Y)	42003	Beta-actin-like protein 2 OS=Homo sapiens GN=ACTBL2 PE=1 SV=2
sp|P07355|ANXA2_HUMAN	158.48	34	10	2	Carbamidomethylation; iTRAQ 4plex (K N-term)	38604	Annexin A2 OS=Homo sapiens GN=ANXA2 PE=1 SV=2
tr|A6PW80|A6PW80_HUMAN	157.77	41	4	1	iTRAQ 4plex (K N-term); iTRAQ 4plex (Y)	12081	Elongation factor 1-alpha 1 (Fragment) OS=Homo sapiens GN=EEF1A1 PE=4 SV=7
sp|P40926|MDHM_HUMAN	156.88	20	6	6	iTRAQ 4plex (K N-term)	35503	Malate dehydrogenase mitochondrial OS=Homo sapiens GN=MDH2 PE=1 SV=3
sp|P06576|ATPB_HUMAN	156.49	19	8	2	Deamidation (NQ); iTRAQ 4plex (K N-term)	56560	ATP synthase subunit beta mitochondrial OS=Homo sapiens GN=ATP5B PE=1 SV=3
sp|Q9Y490|TLN1_HUMAN	155.73	3	4	4	iTRAQ 4plex (K N-term)	269765	Talin-1 OS=Homo sapiens GN=TLN1 PE=1 SV=3
tr|Q5JVS8|Q5JVS8_HUMAN	155.63	55	7	7	Carbamidomethylation; Deamidation (NQ); Pyro-glu from Q; iTRAQ 4plex (K N-term); iTRAQ 4plex (Y)	20036	Vimentin (Fragment) OS=Homo sapiens GN=VIM PE=1 SV=1
sp|P35580|MYH10_HUMAN	155.35	5	6	3	iTRAQ 4plex (K N-term)	228997	Myosin-10 OS=Homo sapiens GN=MYH10 PE=1 SV=3
sp|P62258|1433E_HUMAN	155.06	37	8	5	iTRAQ 4plex (K N-term); iTRAQ 4plex (Y)	29174	14-3-3 protein epsilon OS=Homo sapiens GN=YWHAE PE=1 SV=1
tr|H0YM50|H0YM50_HUMAN	154.2	44	9	2	Carbamidomethylation; iTRAQ 4plex (K N-term)	28379	Annexin (Fragment) OS=Homo sapiens GN=ANXA2 PE=1 SV=1
sp|P04406|G3P_HUMAN	154.15	24	7	7	Deamidation (NQ); iTRAQ 4plex (K N-term); iTRAQ 4plex (Y)	36053	Glyceraldehyde-3-phosphate dehydrogenase OS=Homo sapiens GN=GAPDH PE=1 SV=3
sp|Q00839|HNRPU_HUMAN	153.86	11	9	9	Deamidation (NQ); iTRAQ 4plex (K N-term)	90585	Heterogeneous nuclear ribonucleoprotein U OS=Homo sapiens GN=HNRNPU PE=1 SV=6
tr|J3QL43|J3QL43_HUMAN	153.8	43	8	8	iTRAQ 4plex (K N-term)	30649	Eukaryotic initiation factor 4A-I (Fragment) OS=Homo sapiens GN=EIF4A1 PE=1 SV=1
tr|J3KT12|J3KT12_HUMAN	153.8	34	8	8	iTRAQ 4plex (K N-term)	38862	Eukaryotic initiation factor 4A-I OS=Homo sapiens GN=EIF4A1 PE=1 SV=1
tr|Q5T985|Q5T985_HUMAN	153.64	8	9	8	iTRAQ 4plex (K N-term)	105216	Inter-alpha-trypsin inhibitor heavy chain H2 OS=Homo sapiens GN=ITIH2 PE=1 SV=1
sp|P19823|ITIH2_HUMAN	153.64	8	9	8	iTRAQ 4plex (K N-term)	106463	Inter-alpha-trypsin inhibitor heavy chain H2 OS=Homo sapiens GN=ITIH2 PE=1 SV=2
sp|Q71DI3|H32_HUMAN	153.33	57	9	1	Carbamidomethylation; iTRAQ 4plex (K N-term); iTRAQ 4plex (Y)	15388	Histone H3.2 OS=Homo sapiens GN=HIST2H3A PE=1 SV=3
sp|O75369|FLNB_HUMAN	153.33	4	10	6	Pyro-glu from Q; iTRAQ 4plex (K N-term)	278162	Filamin-B OS=Homo sapiens GN=FLNB PE=1 SV=2
sp|P12814|ACTN1_HUMAN	153.2	10	8	1	iTRAQ 4plex (K N-term)	103058	Alpha-actinin-1 OS=Homo sapiens GN=ACTN1 PE=1 SV=2
tr|C9JDS9|C9JDS9_HUMAN	152.81	37	5	1	iTRAQ 4plex (K N-term)	17671	Tubulin alpha-4A chain (Fragment) OS=Homo sapiens GN=TUBA4A PE=1 SV=1
tr|A0A087WTE1|A0A087WTE1_HUMAN	151.8	8	9	8	iTRAQ 4plex (K N-term)	106657	Inter-alpha-trypsin inhibitor heavy chain H2 OS=Homo sapiens GN=ITIH2 PE=1 SV=1
sp|P12235|ADT1_HUMAN	151.48	28	10	1	iTRAQ 4plex (K N-term); iTRAQ 4plex (Y)	33065	ADP/ATP translocase 1 OS=Homo sapiens GN=SLC25A4 PE=1 SV=4
sp|P01023|A2MG_HUMAN	150.94	5	9	6	Pyro-glu from Q; iTRAQ 4plex (K N-term); iTRAQ 4plex (Y)	163290	Alpha-2-macroglobulin OS=Homo sapiens GN=A2M PE=1 SV=3
tr|J3KTB5|J3KTB5_HUMAN	150.13	32	7	7	iTRAQ 4plex (K N-term)	29082	Eukaryotic initiation factor 4A-I (Fragment) OS=Homo sapiens GN=EIF4A1 PE=1 SV=1
sp|Q06830|PRDX1_HUMAN	150.13	29	6	4	iTRAQ 4plex (K N-term)	22110	Peroxiredoxin-1 OS=Homo sapiens GN=PRDX1 PE=1 SV=1
tr|H3BR04|H3BR04_HUMAN	149.87	49	8	7	iTRAQ 4plex (K N-term)	17793	Fructose-bisphosphate aldolase A (Fragment) OS=Homo sapiens GN=ALDOA PE=1 SV=1
tr|J3KS25|J3KS25_HUMAN	149.01	58	7	7	iTRAQ 4plex (K N-term)	20689	Eukaryotic initiation factor 4A-I (Fragment) OS=Homo sapiens GN=EIF4A1 PE=1 SV=7
tr|J3QR64|J3QR64_HUMAN	149.01	51	7	7	iTRAQ 4plex (K N-term)	23780	Eukaryotic initiation factor 4A-I (Fragment) OS=Homo sapiens GN=EIF4A1 PE=1 SV=1
tr|J3QS69|J3QS69_HUMAN	148.82	36	7	7	iTRAQ 4plex (K N-term)	33949	Eukaryotic initiation factor 4A-I (Fragment) OS=Homo sapiens GN=EIF4A1 PE=1 SV=1
sp|P04908|H2A1B_HUMAN	148.81	37	7	2	iTRAQ 4plex (K N-term)	14135	Histone H2A type 1-B/E OS=Homo sapiens GN=HIST1H2AB PE=1 SV=2
sp|Q7L7L0|H2A3_HUMAN	148.81	37	7	2	iTRAQ 4plex (K N-term)	14121	Histone H2A type 3 OS=Homo sapiens GN=HIST3H2A PE=1 SV=3
sp|P20671|H2A1D_HUMAN	148.81	37	7	2	iTRAQ 4plex (K N-term)	14107	Histone H2A type 1-D OS=Homo sapiens GN=HIST1H2AD PE=1 SV=2
tr|A0A0U1RR32|A0A0U1RR32_HUMAN	148.81	28	7	2	iTRAQ 4plex (K N-term)	18482	Histone H2A OS=Homo sapiens GN=hCG_2039566 PE=3 SV=1
tr|A0A0U1RRH7|A0A0U1RRH7_HUMAN	148.81	28	7	2	iTRAQ 4plex (K N-term)	18553	Histone H2A OS=Homo sapiens PE=3 SV=1
tr|K7ERX7|K7ERX7_HUMAN	148.55	37	7	7	iTRAQ 4plex (K N-term)	21590	ATP synthase subunit alpha mitochondrial (Fragment) OS=Homo sapiens GN=ATP5A1 PE=1 SV=1
sp|O43707|ACTN4_HUMAN	148.46	10	8	1	iTRAQ 4plex (K N-term)	104854	Alpha-actinin-4 OS=Homo sapiens GN=ACTN4 PE=1 SV=2
sp|P16401|H15_HUMAN	148.41	21	5	2	iTRAQ 4plex (K N-term); iTRAQ 4plex (Y)	22580	Histone H1.5 OS=Homo sapiens GN=HIST1H1B PE=1 SV=3
tr|A0A0A0MSI0|A0A0A0MSI0_HUMAN	147.58	34	6	4	iTRAQ 4plex (K N-term)	18976	Peroxiredoxin-1 (Fragment) OS=Homo sapiens GN=PRDX1 PE=1 SV=1
tr|E7EUT5|E7EUT5_HUMAN	147.39	28	6	6	Deamidation (NQ); iTRAQ 4plex (K N-term); iTRAQ 4plex (Y)	27871	Glyceraldehyde-3-phosphate dehydrogenase OS=Homo sapiens GN=GAPDH PE=1 SV=1
sp|P63104|1433Z_HUMAN	146.89	25	7	2	Oxidation (M); iTRAQ 4plex (K N-term); iTRAQ 4plex (Y)	27745	14-3-3 protein zeta/delta OS=Homo sapiens GN=YWHAZ PE=1 SV=1
tr|E7EX29|E7EX29_HUMAN	146.89	25	7	2	Oxidation (M); iTRAQ 4plex (K N-term); iTRAQ 4plex (Y)	28037	14-3-3 protein zeta/delta (Fragment) OS=Homo sapiens GN=YWHAZ PE=1 SV=1
tr|H9KV75|H9KV75_HUMAN	146.42	10	7	1	iTRAQ 4plex (K N-term)	94826	Alpha-actinin-1 OS=Homo sapiens GN=ACTN1 PE=1 SV=1
tr|F8WE98|F8WE98_HUMAN	145.87	15	6	4	iTRAQ 4plex (K N-term)	66592	Filamin-A (Fragment) OS=Homo sapiens GN=FLNA PE=1 SV=2
sp|Q93077|H2A1C_HUMAN	145.18	32	6	1	iTRAQ 4plex (K N-term)	14105	Histone H2A type 1-C OS=Homo sapiens GN=HIST1H2AC PE=1 SV=3
sp|Q99878|H2A1J_HUMAN	145.18	33	6	1	iTRAQ 4plex (K N-term)	13936	Histone H2A type 1-J OS=Homo sapiens GN=HIST1H2AJ PE=1 SV=3
sp|Q96KK5|H2A1H_HUMAN	145.18	33	6	1	iTRAQ 4plex (K N-term)	13906	Histone H2A type 1-H OS=Homo sapiens GN=HIST1H2AH PE=1 SV=3
sp|Q16777|H2A2C_HUMAN	145.18	33	6	1	iTRAQ 4plex (K N-term)	13988	Histone H2A type 2-C OS=Homo sapiens GN=HIST2H2AC PE=1 SV=4
sp|Q9BTM1|H2AJ_HUMAN	145.18	33	6	1	iTRAQ 4plex (K N-term)	14019	Histone H2A.J OS=Homo sapiens GN=H2AFJ PE=1 SV=1
sp|P0C0S8|H2A1_HUMAN	145.18	32	6	1	iTRAQ 4plex (K N-term)	14091	Histone H2A type 1 OS=Homo sapiens GN=HIST1H2AG PE=1 SV=2
sp|Q6FI13|H2A2A_HUMAN	145.18	32	6	1	iTRAQ 4plex (K N-term)	14095	Histone H2A type 2-A OS=Homo sapiens GN=HIST2H2AA3 PE=1 SV=3
sp|P40227|TCPZ_HUMAN	145.06	16	7	7	iTRAQ 4plex (K N-term)	58024	T-complex protein 1 subunit zeta OS=Homo sapiens GN=CCT6A PE=1 SV=3
tr|J3QLN6|J3QLN6_HUMAN	144.81	45	6	6	iTRAQ 4plex (K N-term)	18043	Eukaryotic initiation factor 4A-I (Fragment) OS=Homo sapiens GN=EIF4A1 PE=1 SV=1
tr|J3QKZ9|J3QKZ9_HUMAN	144.81	55	6	6	iTRAQ 4plex (K N-term)	14708	Eukaryotic initiation factor 4A-I (Fragment) OS=Homo sapiens GN=EIF4A1 PE=1 SV=7
tr|H0YH81|H0YH81_HUMAN	144.4	20	6	1	Deamidation (NQ); iTRAQ 4plex (K N-term)	38258	ATP synthase subunit beta (Fragment) OS=Homo sapiens GN=ATP5B PE=1 SV=1
tr|J3QS39|J3QS39_HUMAN	143.56	56	6	6	iTRAQ 4plex (K N-term)	10469	Polyubiquitin-B (Fragment) OS=Homo sapiens GN=UBB PE=1 SV=1
tr|J3QTR3|J3QTR3_HUMAN	143.56	49	6	6	iTRAQ 4plex (K N-term)	12237	Ubiquitin-40S ribosomal protein S27a (Fragment) OS=Homo sapiens GN=RPS27A PE=1 SV=1
tr|F5H6Q2|F5H6Q2_HUMAN	143.56	42	6	6	iTRAQ 4plex (K N-term)	13789	Polyubiquitin-C (Fragment) OS=Homo sapiens GN=UBC PE=1 SV=7
tr|F5GYU3|F5GYU3_HUMAN	143.56	39	6	6	iTRAQ 4plex (K N-term)	15032	Polyubiquitin-C (Fragment) OS=Homo sapiens GN=UBC PE=1 SV=1
tr|F5H2Z3|F5H2Z3_HUMAN	143.56	38	6	6	iTRAQ 4plex (K N-term)	15310	Polyubiquitin-C (Fragment) OS=Homo sapiens GN=UBC PE=1 SV=1
tr|F5H265|F5H265_HUMAN	143.56	35	6	6	iTRAQ 4plex (K N-term)	16841	Polyubiquitin-C (Fragment) OS=Homo sapiens GN=UBC PE=1 SV=1
tr|B4DV12|B4DV12_HUMAN	143.56	34	6	6	iTRAQ 4plex (K N-term)	17215	Polyubiquitin-B OS=Homo sapiens GN=UBB PE=1 SV=1
tr|F5H388|F5H388_HUMAN	143.56	34	6	6	iTRAQ 4plex (K N-term)	17484	Polyubiquitin-C (Fragment) OS=Homo sapiens GN=UBC PE=1 SV=1
tr|F5H747|F5H747_HUMAN	143.56	32	6	6	iTRAQ 4plex (K N-term)	18174	Polyubiquitin-C (Fragment) OS=Homo sapiens GN=UBC PE=1 SV=7
tr|F5GXK7|F5GXK7_HUMAN	143.56	31	6	6	iTRAQ 4plex (K N-term)	19016	Polyubiquitin-C (Fragment) OS=Homo sapiens GN=UBC PE=1 SV=2
tr|J3QKN0|J3QKN0_HUMAN	143.56	25	6	6	iTRAQ 4plex (K N-term)	23163	Polyubiquitin-B (Fragment) OS=Homo sapiens GN=UBB PE=1 SV=1
tr|Q5PY61|Q5PY61_HUMAN	143.56	23	6	6	iTRAQ 4plex (K N-term)	25758	Polyubiquitin-C OS=Homo sapiens GN=UBC PE=1 SV=1
sp|P0CG47|UBB_HUMAN	143.56	23	6	6	iTRAQ 4plex (K N-term)	25762	Polyubiquitin-B OS=Homo sapiens GN=UBB PE=1 SV=1
tr|Q96C32|Q96C32_HUMAN	143.56	17	6	6	iTRAQ 4plex (K N-term)	34304	Polyubiquitin-C OS=Homo sapiens GN=UBC PE=1 SV=1
sp|P0CG48|UBC_HUMAN	143.56	8	6	6	iTRAQ 4plex (K N-term)	77039	Polyubiquitin-C OS=Homo sapiens GN=UBC PE=1 SV=3
tr|H3BU78|H3BU78_HUMAN	143.41	31	7	5	iTRAQ 4plex (K N-term); iTRAQ 4plex (Y)	22094	Fructose-bisphosphate aldolase (Fragment) OS=Homo sapiens GN=ALDOA PE=1 SV=2
tr|K7EK77|K7EK77_HUMAN	142.74	33	7	7	iTRAQ 4plex (K N-term)	22200	ATP synthase subunit alpha mitochondrial (Fragment) OS=Homo sapiens GN=ATP5A1 PE=1 SV=1
tr|H0YMD0|H0YMD0_HUMAN	142.71	34	7	1	iTRAQ 4plex (K N-term)	25342	Annexin (Fragment) OS=Homo sapiens GN=ANXA2 PE=1 SV=1
tr|H0YMU9|H0YMU9_HUMAN	142.71	34	7	1	iTRAQ 4plex (K N-term)	25569	Annexin OS=Homo sapiens GN=ANXA2 PE=1 SV=1
tr|H0YN42|H0YN42_HUMAN	142.71	30	7	1	iTRAQ 4plex (K N-term)	28825	Annexin (Fragment) OS=Homo sapiens GN=ANXA2 PE=1 SV=1
tr|H3BUH7|H3BUH7_HUMAN	142.68	47	8	7	iTRAQ 4plex (K N-term)	16917	Fructose-bisphosphate aldolase A (Fragment) OS=Homo sapiens GN=ALDOA PE=1 SV=1
sp|P30101|PDIA3_HUMAN	142.25	13	9	9	iTRAQ 4plex (K N-term); iTRAQ 4plex (Y)	56782	Protein disulfide-isomerase A3 OS=Homo sapiens GN=PDIA3 PE=1 SV=4
sp|P08758|ANXA5_HUMAN	141.99	23	7	6	iTRAQ 4plex (K N-term)	35937	Annexin A5 OS=Homo sapiens GN=ANXA5 PE=1 SV=2
sp|P61978|HNRPK_HUMAN	140.74	12	6	6	iTRAQ 4plex (K N-term)	50976	Heterogeneous nuclear ribonucleoprotein K OS=Homo sapiens GN=HNRNPK PE=1 SV=1
sp|P22626|ROA2_HUMAN	140.21	23	7	6	iTRAQ 4plex (K N-term)	37430	Heterogeneous nuclear ribonucleoproteins A2/B1 OS=Homo sapiens GN=HNRNPA2B1 PE=1 SV=2
sp|P78371|TCPB_HUMAN	140.07	18	5	5	Pyro-glu from Q; iTRAQ 4plex (K N-term)	57488	T-complex protein 1 subunit beta OS=Homo sapiens GN=CCT2 PE=1 SV=4
tr|D6RBL5|D6RBL5_HUMAN	139.83	29	7	6	iTRAQ 4plex (K N-term)	29337	Annexin OS=Homo sapiens GN=ANXA5 PE=1 SV=1
sp|P62753|RS6_HUMAN	139.68	24	5	5	Carbamidomethylation; Pyro-glu from Q; iTRAQ 4plex (K N-term)	28681	40S ribosomal protein S6 OS=Homo sapiens GN=RPS6 PE=1 SV=1
tr|H0Y8L7|H0Y8L7_HUMAN	139.64	29	6	6	iTRAQ 4plex (K N-term)	22137	40S ribosomal protein S3a (Fragment) OS=Homo sapiens GN=RPS3A PE=1 SV=1
tr|E9PFI5|E9PFI5_HUMAN	139.64	27	6	6	iTRAQ 4plex (K N-term)	23747	40S ribosomal protein S3a OS=Homo sapiens GN=RPS3A PE=1 SV=1
sp|P61247|RS3A_HUMAN	139.64	21	6	6	iTRAQ 4plex (K N-term)	29945	40S ribosomal protein S3a OS=Homo sapiens GN=RPS3A PE=1 SV=2
sp|P69905|HBA_HUMAN	138.11	35	5	5	Oxidation (M); iTRAQ 4plex (K N-term); iTRAQ 4plex (Y)	15258	Hemoglobin subunit alpha OS=Homo sapiens GN=HBA1 PE=1 SV=2
tr|A0A075B736|A0A075B736_HUMAN	137.96	12	7	7	iTRAQ 4plex (K N-term)	45696	Tubulin beta-8 chain OS=Homo sapiens GN=TUBB8 PE=1 SV=1
tr|Q5SQY0|Q5SQY0_HUMAN	137.96	12	7	7	iTRAQ 4plex (K N-term)	45492	Tubulin beta-8 chain OS=Homo sapiens GN=TUBB8 PE=1 SV=1
sp|Q3ZCM7|TBB8_HUMAN	137.96	11	7	7	iTRAQ 4plex (K N-term)	49776	Tubulin beta-8 chain OS=Homo sapiens GN=TUBB8 PE=1 SV=2
sp|A6NNZ2|TBB8L_HUMAN	137.96	11	7	7	iTRAQ 4plex (K N-term)	49573	Tubulin beta-8 chain-like protein LOC260334 OS=Homo sapiens PE=1 SV=1
tr|H0YKS4|H0YKS4_HUMAN	135.76	40	6	1	iTRAQ 4plex (K N-term)	19530	Annexin (Fragment) OS=Homo sapiens GN=ANXA2 PE=1 SV=1
sp|P15880|RS2_HUMAN	135.42	31	10	9	iTRAQ 4plex (K N-term); iTRAQ 4plex (Y)	31324	40S ribosomal protein S2 OS=Homo sapiens GN=RPS2 PE=1 SV=2
sp|P27797|CALR_HUMAN	135.11	15	5	5	iTRAQ 4plex (K N-term)	48142	Calreticulin OS=Homo sapiens GN=CALR PE=1 SV=1
tr|F5H0C8|F5H0C8_HUMAN	134.85	17	3	1	Carbamidomethylation; iTRAQ 4plex (K N-term)	34762	Gamma-enolase OS=Homo sapiens GN=ENO2 PE=1 SV=1
sp|P09104|ENOG_HUMAN	134.85	12	3	1	Carbamidomethylation; iTRAQ 4plex (K N-term)	47269	Gamma-enolase OS=Homo sapiens GN=ENO2 PE=1 SV=3
sp|P22392|NDKB_HUMAN	134.75	42	6	6	Deamidation (NQ); Oxidation (M); Pyro-glu from Q; iTRAQ 4plex (K N-term); iTRAQ 4plex (Y)	17298	Nucleoside diphosphate kinase B OS=Homo sapiens GN=NME2 PE=1 SV=1
tr|Q32Q12|Q32Q12_HUMAN	134.75	22	6	6	Deamidation (NQ); Oxidation (M); Pyro-glu from Q; iTRAQ 4plex (K N-term); iTRAQ 4plex (Y)	32642	Nucleoside diphosphate kinase OS=Homo sapiens GN=NME1-NME2 PE=1 SV=1
sp|P22314|UBA1_HUMAN	134.67	8	6	6	Deamidation (NQ); iTRAQ 4plex (K N-term); iTRAQ 4plex (Y)	117849	Ubiquitin-like modifier-activating enzyme 1 OS=Homo sapiens GN=UBA1 PE=1 SV=3
tr|D6RG13|D6RG13_HUMAN	134.4	22	5	5	iTRAQ 4plex (K N-term)	25608	40S ribosomal protein S3a (Fragment) OS=Homo sapiens GN=RPS3A PE=1 SV=1
tr|Q5T6W2|Q5T6W2_HUMAN	134.31	12	5	5	iTRAQ 4plex (K N-term)	41807	Heterogeneous nuclear ribonucleoprotein K (Fragment) OS=Homo sapiens GN=HNRNPK PE=1 SV=1
sp|P38646|GRP75_HUMAN	134.15	12	7	5	iTRAQ 4plex (K N-term)	73681	Stress-70 protein mitochondrial OS=Homo sapiens GN=HSPA9 PE=1 SV=2
sp|P62081|RS7_HUMAN	133.64	32	5	5	iTRAQ 4plex (K N-term)	22127	40S ribosomal protein S7 OS=Homo sapiens GN=RPS7 PE=1 SV=1
tr|F8W1R7|F8W1R7_HUMAN	133.61	32	4	4	iTRAQ 4plex (K N-term)	16290	Myosin light polypeptide 6 OS=Homo sapiens GN=MYL6 PE=1 SV=1
sp|P60660|MYL6_HUMAN	133.61	30	4	4	iTRAQ 4plex (K N-term)	16930	Myosin light polypeptide 6 OS=Homo sapiens GN=MYL6 PE=1 SV=2
tr|J3KND3|J3KND3_HUMAN	133.61	30	4	4	iTRAQ 4plex (K N-term)	17058	Myosin light polypeptide 6 OS=Homo sapiens GN=MYL6 PE=1 SV=1
tr|G8JLA2|G8JLA2_HUMAN	133.61	30	4	4	iTRAQ 4plex (K N-term)	17089	Myosin light polypeptide 6 OS=Homo sapiens GN=MYL6 PE=1 SV=1
tr|G3V1V0|G3V1V0_HUMAN	133.61	29	4	4	iTRAQ 4plex (K N-term)	18037	Myosin light polypeptide 6 OS=Homo sapiens GN=MYL6 PE=1 SV=1
tr|B7Z6Z4|B7Z6Z4_HUMAN	133.61	19	4	4	iTRAQ 4plex (K N-term)	26707	Myosin light polypeptide 6 OS=Homo sapiens GN=MYL6 PE=1 SV=1
tr|K7ESM5|K7ESM5_HUMAN	133.59	12	6	6	iTRAQ 4plex (K N-term)	37382	Tubulin beta-6 chain (Fragment) OS=Homo sapiens GN=TUBB6 PE=1 SV=1
sp|Q9BUF5|TBB6_HUMAN	133.59	9	6	6	iTRAQ 4plex (K N-term)	49857	Tubulin beta-6 chain OS=Homo sapiens GN=TUBB6 PE=1 SV=1
tr|E7EN95|E7EN95_HUMAN	132.7	3	8	6	Pyro-glu from Q; iTRAQ 4plex (K N-term)	256278	Filamin-B OS=Homo sapiens GN=FLNB PE=1 SV=1
tr|A2A3R5|A2A3R5_HUMAN	132.54	24	4	4	Carbamidomethylation; Pyro-glu from Q; iTRAQ 4plex (K N-term)	24968	40S ribosomal protein S6 OS=Homo sapiens GN=RPS6 PE=1 SV=1
tr|M0R1V7|M0R1V7_HUMAN	132.39	68	5	5	iTRAQ 4plex (K N-term)	7132	Ubiquitin-60S ribosomal protein L40 (Fragment) OS=Homo sapiens GN=UBA52 PE=1 SV=1
tr|F5GYU2|F5GYU2_HUMAN	132.24	33	5	3	Carbamidomethylation; iTRAQ 4plex (K N-term)	15846	L-lactate dehydrogenase A chain (Fragment) OS=Homo sapiens GN=LDHA PE=1 SV=1
tr|A6NLN1|A6NLN1_HUMAN	131.75	8	2	2	iTRAQ 4plex (K N-term)	56511	Polypyrimidine tract binding protein 1 isoform CRA_b OS=Homo sapiens GN=PTBP1 PE=1 SV=4
sp|P26599|PTBP1_HUMAN	131.75	8	2	2	iTRAQ 4plex (K N-term)	57221	Polypyrimidine tract-binding protein 1 OS=Homo sapiens GN=PTBP1 PE=1 SV=1
tr|A0A0U1RRM4|A0A0U1RRM4_HUMAN	131.75	7	2	2	iTRAQ 4plex (K N-term)	62464	Polypyrimidine tract-binding protein 1 OS=Homo sapiens GN=PTBP1 PE=1 SV=1
tr|E7ENZ3|E7ENZ3_HUMAN	130.97	15	4	4	Pyro-glu from Q; iTRAQ 4plex (K N-term)	53849	T-complex protein 1 subunit epsilon OS=Homo sapiens GN=CCT5 PE=1 SV=1
tr|B7ZAR1|B7ZAR1_HUMAN	130.97	14	4	4	Pyro-glu from Q; iTRAQ 4plex (K N-term)	55349	T-complex protein 1 subunit epsilon OS=Homo sapiens GN=CCT5 PE=1 SV=1
sp|P48643|TCPE_HUMAN	130.97	13	4	4	Pyro-glu from Q; iTRAQ 4plex (K N-term)	59671	T-complex protein 1 subunit epsilon OS=Homo sapiens GN=CCT5 PE=1 SV=1
tr|E9PCA1|E9PCA1_HUMAN	130.97	14	4	4	Pyro-glu from Q; iTRAQ 4plex (K N-term)	57144	T-complex protein 1 subunit epsilon OS=Homo sapiens GN=CCT5 PE=1 SV=1
tr|E9PS65|E9PS65_HUMAN	130.88	28	6	4	Deamidation (NQ); iTRAQ 4plex (K N-term)	24853	Heat shock cognate 71 kDa protein (Fragment) OS=Homo sapiens GN=HSPA8 PE=1 SV=1
tr|H0YAB0|H0YAB0_HUMAN	130.82	31	6	6	iTRAQ 4plex (K N-term)	20796	Prelamin-A/C (Fragment) OS=Homo sapiens GN=LMNA PE=1 SV=1
tr|K7EM20|K7EM20_HUMAN	130.39	59	5	4	iTRAQ 4plex (K N-term); iTRAQ 4plex (Y)	12869	14-3-3 protein epsilon (Fragment) OS=Homo sapiens GN=YWHAE PE=1 SV=1
tr|F8WE65|F8WE65_HUMAN	130.33	33	7	6	iTRAQ 4plex (K N-term)	13022	Peptidyl-prolyl cis-trans isomerase OS=Homo sapiens GN=PPIA PE=1 SV=1
tr|C9J5S7|C9J5S7_HUMAN	130.33	33	7	6	iTRAQ 4plex (K N-term)	13208	Peptidyl-prolyl cis-trans isomerase OS=Homo sapiens GN=PPIA PE=1 SV=1
sp|P39023|RL3_HUMAN	129.95	16	6	6	iTRAQ 4plex (K N-term)	46109	60S ribosomal protein L3 OS=Homo sapiens GN=RPL3 PE=1 SV=2
sp|P18206|VINC_HUMAN	129.69	7	4	4	iTRAQ 4plex (K N-term)	123799	Vinculin OS=Homo sapiens GN=VCL PE=1 SV=4
tr|E7EQG2|E7EQG2_HUMAN	128.19	19	6	6	iTRAQ 4plex (K N-term)	41290	Eukaryotic initiation factor 4A-II OS=Homo sapiens GN=EIF4A2 PE=1 SV=1
sp|Q14240|IF4A2_HUMAN	128.19	17	6	6	iTRAQ 4plex (K N-term)	46402	Eukaryotic initiation factor 4A-II OS=Homo sapiens GN=EIF4A2 PE=1 SV=2
sp|Q15149|PLEC_HUMAN	127.19	2	7	4	iTRAQ 4plex (K N-term)	531796	Plectin OS=Homo sapiens GN=PLEC PE=1 SV=3
sp|P18669|PGAM1_HUMAN	127.12	28	6	6	iTRAQ 4plex (K N-term)	28804	Phosphoglycerate mutase 1 OS=Homo sapiens GN=PGAM1 PE=1 SV=2
tr|H0YFX9|H0YFX9_HUMAN	126.65	36	5	1	iTRAQ 4plex (K N-term)	9976	Histone H2A (Fragment) OS=Homo sapiens GN=H2AFJ PE=1 SV=1
tr|F5GXH2|F5GXH2_HUMAN	126.56	37	4	2	Carbamidomethylation; iTRAQ 4plex (K N-term)	12483	L-lactate dehydrogenase A chain (Fragment) OS=Homo sapiens GN=LDHA PE=1 SV=1
sp|Q58FF3|ENPLL_HUMAN	126.43	12	6	6	iTRAQ 4plex (K N-term)	45859	Putative endoplasmin-like protein OS=Homo sapiens GN=HSP90B2P PE=5 SV=1
tr|K7EJP1|K7EJP1_HUMAN	126.33	36	5	5	iTRAQ 4plex (K N-term)	15339	ATP synthase subunit alpha mitochondrial (Fragment) OS=Homo sapiens GN=ATP5A1 PE=1 SV=7
sp|P0DMV9|HS71B_HUMAN	126.03	7	5	1	iTRAQ 4plex (K N-term)	70052	Heat shock 70 kDa protein 1B OS=Homo sapiens GN=HSPA1B PE=1 SV=1
sp|P0DMV8|HS71A_HUMAN	126.03	7	5	1	iTRAQ 4plex (K N-term)	70052	Heat shock 70 kDa protein 1A OS=Homo sapiens GN=HSPA1A PE=1 SV=1
tr|A0A0G2JIW1|A0A0G2JIW1_HUMAN	126.03	7	5	1	iTRAQ 4plex (K N-term)	70109	Heat shock 70 kDa protein 1B OS=Homo sapiens GN=HSPA1B PE=1 SV=1
tr|E9PM13|E9PM13_HUMAN	125.99	37	5	4	Deamidation (NQ); iTRAQ 4plex (K N-term)	17258	Heat shock cognate 71 kDa protein (Fragment) OS=Homo sapiens GN=HSPA8 PE=1 SV=7
sp|P02771|FETA_HUMAN	125.48	7	5	5	Carbamidomethylation; iTRAQ 4plex (K N-term); iTRAQ 4plex (Y)	68678	Alpha-fetoprotein OS=Homo sapiens GN=AFP PE=1 SV=1
tr|J3KMX3|J3KMX3_HUMAN	125.48	7	5	5	Carbamidomethylation; iTRAQ 4plex (K N-term); iTRAQ 4plex (Y)	70450	Alpha-fetoprotein OS=Homo sapiens GN=AFP PE=1 SV=1
sp|Q96A08|H2B1A_HUMAN	125.19	33	5	1	Pyro-glu from Q; iTRAQ 4plex (K N-term)	14167	Histone H2B type 1-A OS=Homo sapiens GN=HIST1H2BA PE=1 SV=3
tr|H0YEN5|H0YEN5_HUMAN	125.11	37	8	7	iTRAQ 4plex (K N-term); iTRAQ 4plex (Y)	21154	40S ribosomal protein S2 (Fragment) OS=Homo sapiens GN=RPS2 PE=1 SV=1
tr|H0YMM1|H0YMM1_HUMAN	124.94	31	4	1	iTRAQ 4plex (K N-term)	16459	Annexin (Fragment) OS=Homo sapiens GN=ANXA2 PE=1 SV=1
tr|A0A0A0MRQ5|A0A0A0MRQ5_HUMAN	124.92	38	4	2	iTRAQ 4plex (K N-term)	10676	Peroxiredoxin-1 OS=Homo sapiens GN=PRDX1 PE=1 SV=1
tr|D6RBE9|D6RBE9_HUMAN	124.55	26	5	4	iTRAQ 4plex (K N-term)	24698	Annexin OS=Homo sapiens GN=ANXA5 PE=1 SV=1
sp|P17661|DESM_HUMAN	124.4	6	4	3	iTRAQ 4plex (K N-term); iTRAQ 4plex (Y)	53536	Desmin OS=Homo sapiens GN=DES PE=1 SV=3
tr|X6RJP6|X6RJP6_HUMAN	124.38	32	4	4	Carbamidomethylation; iTRAQ 4plex (K N-term); iTRAQ 4plex (Y)	21086	Transgelin-2 (Fragment) OS=Homo sapiens GN=TAGLN2 PE=1 SV=1
sp|P37802|TAGL2_HUMAN	124.38	30	4	4	Carbamidomethylation; iTRAQ 4plex (K N-term); iTRAQ 4plex (Y)	22391	Transgelin-2 OS=Homo sapiens GN=TAGLN2 PE=1 SV=3
tr|D6RB09|D6RB09_HUMAN	124.24	21	4	4	iTRAQ 4plex (K N-term)	22573	40S ribosomal protein S3a (Fragment) OS=Homo sapiens GN=RPS3A PE=1 SV=7
tr|D6RAT0|D6RAT0_HUMAN	124.24	18	4	4	iTRAQ 4plex (K N-term)	25887	40S ribosomal protein S3a OS=Homo sapiens GN=RPS3A PE=1 SV=1
tr|F8W6I7|F8W6I7_HUMAN	124.22	24	6	4	iTRAQ 4plex (K N-term)	33155	Heterogeneous nuclear ribonucleoprotein A1 OS=Homo sapiens GN=HNRNPA1 PE=1 SV=2
sp|P09651|ROA1_HUMAN	124.22	20	6	4	iTRAQ 4plex (K N-term)	38747	Heterogeneous nuclear ribonucleoprotein A1 OS=Homo sapiens GN=HNRNPA1 PE=1 SV=5
sp|Q9H853|TBA4B_HUMAN	124.03	17	3	1	iTRAQ 4plex (K N-term)	27551	Putative tubulin-like protein alpha-4B OS=Homo sapiens GN=TUBA4B PE=5 SV=2
tr|H0YB80|H0YB80_HUMAN	123.06	30	4	1	Oxidation (M); iTRAQ 4plex (K N-term)	14636	14-3-3 protein zeta/delta (Fragment) OS=Homo sapiens GN=YWHAZ PE=1 SV=1
tr|B0AZS6|B0AZS6_HUMAN	123.06	23	4	1	Oxidation (M); iTRAQ 4plex (K N-term)	19072	14-3-3 protein zeta/delta OS=Homo sapiens GN=YWHAZ PE=1 SV=1
sp|P35241|RADI_HUMAN	122.92	9	5	1	Pyro-glu from Q; iTRAQ 4plex (K N-term)	68564	Radixin OS=Homo sapiens GN=RDX PE=1 SV=1
tr|E9PKH2|E9PKH2_HUMAN	122.88	24	4	4	Deamidation (NQ); iTRAQ 4plex (K N-term); iTRAQ 4plex (Y)	23092	Serpin H1 OS=Homo sapiens GN=SERPINH1 PE=1 SV=1
sp|P50454|SERPH_HUMAN	122.88	12	4	4	Deamidation (NQ); iTRAQ 4plex (K N-term); iTRAQ 4plex (Y)	46441	Serpin H1 OS=Homo sapiens GN=SERPINH1 PE=1 SV=2
sp|P26641|EF1G_HUMAN	122.78	11	4	4	iTRAQ 4plex (K N-term)	50119	Elongation factor 1-gamma OS=Homo sapiens GN=EEF1G PE=1 SV=3
tr|G3V2A3|G3V2A3_HUMAN	121.87	22	4	4	iTRAQ 4plex (K N-term)	20657	Tubulin beta-3 chain (Fragment) OS=Homo sapiens GN=TUBB3 PE=1 SV=1
tr|E5RGZ4|E5RGZ4_HUMAN	121.8	22	4	2	Deamidation (NQ); iTRAQ 4plex (K N-term)	30403	Beta-enolase (Fragment) OS=Homo sapiens GN=ENO3 PE=1 SV=1
tr|G3V1N2|G3V1N2_HUMAN	121.66	31	4	4	Oxidation (M); iTRAQ 4plex (K N-term)	11948	HCG1745306 isoform CRA_a OS=Homo sapiens GN=HBA2 PE=1 SV=1
tr|F8VPF3|F8VPF3_HUMAN	121.51	29	3	3	iTRAQ 4plex (K N-term)	14436	Myosin light polypeptide 6 (Fragment) OS=Homo sapiens GN=MYL6 PE=1 SV=1
tr|D6RED7|D6RED7_HUMAN	121.42	41	4	4	iTRAQ 4plex (K N-term)	11572	40S ribosomal protein S3a (Fragment) OS=Homo sapiens GN=RPS3A PE=1 SV=1
tr|D6RAS7|D6RAS7_HUMAN	121.42	33	4	4	iTRAQ 4plex (K N-term)	14446	40S ribosomal protein S3a (Fragment) OS=Homo sapiens GN=RPS3A PE=1 SV=1
sp|P0C0S5|H2AZ_HUMAN	121.16	31	4	2	iTRAQ 4plex (K N-term)	13553	Histone H2A.Z OS=Homo sapiens GN=H2AFZ PE=1 SV=2
sp|Q71UI9|H2AV_HUMAN	121.16	31	4	2	iTRAQ 4plex (K N-term)	13509	Histone H2A.V OS=Homo sapiens GN=H2AFV PE=1 SV=3
tr|D6RI02|D6RI02_HUMAN	120.45	41	4	4	iTRAQ 4plex (K N-term)	10615	40S ribosomal protein S3a OS=Homo sapiens GN=RPS3A PE=1 SV=1
tr|G5E9G0|G5E9G0_HUMAN	120.38	16	5	5	iTRAQ 4plex (K N-term)	40267	60S ribosomal protein L3 OS=Homo sapiens GN=RPL3 PE=1 SV=1
tr|F8VYN5|F8VYN5_HUMAN	120.29	59	5	4	iTRAQ 4plex (K N-term)	12897	Heterogeneous nuclear ribonucleoprotein A1 (Fragment) OS=Homo sapiens GN=HNRNPA1 PE=1 SV=1
tr|F8VZ49|F8VZ49_HUMAN	120.29	29	5	4	iTRAQ 4plex (K N-term)	25687	Heterogeneous nuclear ribonucleoprotein A1 (Fragment) OS=Homo sapiens GN=HNRNPA1 PE=1 SV=1
tr|B7Z2E6|B7Z2E6_HUMAN	120	31	4	1	Oxidation (M); iTRAQ 4plex (K N-term)	13985	14-3-3 protein zeta/delta OS=Homo sapiens GN=YWHAZ PE=1 SV=1
tr|G3XAL0|G3XAL0_HUMAN	119.83	18	4	4	iTRAQ 4plex (K N-term)	24595	Malate dehydrogenase OS=Homo sapiens GN=MDH2 PE=1 SV=1
tr|F5GWF6|F5GWF6_HUMAN	119.61	15	4	4	Pyro-glu from Q; iTRAQ 4plex (K N-term)	56807	T-complex protein 1 subunit beta OS=Homo sapiens GN=CCT2 PE=1 SV=2
sp|P62249|RS16_HUMAN	119.39	20	3	3	iTRAQ 4plex (K N-term)	16445	40S ribosomal protein S16 OS=Homo sapiens GN=RPS16 PE=1 SV=2
tr|C9JCQ4|C9JCQ4_HUMAN	119.09	43	3	3	Oxidation (M); iTRAQ 4plex (K N-term)	10279	60 kDa heat shock protein mitochondrial (Fragment) OS=Homo sapiens GN=HSPD1 PE=1 SV=1
tr|C9JL19|C9JL19_HUMAN	119.09	48	3	3	Oxidation (M); iTRAQ 4plex (K N-term)	8991	60 kDa heat shock protein mitochondrial (Fragment) OS=Homo sapiens GN=HSPD1 PE=1 SV=1
tr|J3KPD9|J3KPD9_HUMAN	119.01	23	5	5	Oxidation (M); Pyro-glu from Q; iTRAQ 4plex (K N-term)	22422	Protein NME1-NME2 OS=Homo sapiens GN=NME1-NME2 PE=1 SV=1
tr|F5GZ39|F5GZ39_HUMAN	116.78	56	4	4	iTRAQ 4plex (K N-term)	6876	Polyubiquitin-C (Fragment) OS=Homo sapiens GN=UBC PE=1 SV=1
tr|F8W026|F8W026_HUMAN	116.51	59	4	1	iTRAQ 4plex (K N-term)	5582	Endoplasmin (Fragment) OS=Homo sapiens GN=HSP90B1 PE=1 SV=7
tr|M0R210|M0R210_HUMAN	116.36	22	3	3	iTRAQ 4plex (K N-term)	14419	40S ribosomal protein S16 OS=Homo sapiens GN=RPS16 PE=1 SV=1
tr|A0A087WZ27|A0A087WZ27_HUMAN	116.36	22	3	3	iTRAQ 4plex (K N-term)	14395	Zinc finger protein 90 OS=Homo sapiens GN=ZNF90 PE=4 SV=2
tr|K7EPM1|K7EPM1_HUMAN	115.39	28	3	1	Deamidation (NQ); iTRAQ 4plex (K N-term)	20922	Beta-enolase (Fragment) OS=Homo sapiens GN=ENO3 PE=1 SV=1
tr|K7EKN2|K7EKN2_HUMAN	115.39	25	3	1	Deamidation (NQ); iTRAQ 4plex (K N-term)	22514	Beta-enolase (Fragment) OS=Homo sapiens GN=ENO3 PE=1 SV=1
sp|P62701|RS4X_HUMAN	115.08	21	6	6	iTRAQ 4plex (K N-term)	29598	40S ribosomal protein S4 X isoform OS=Homo sapiens GN=RPS4X PE=1 SV=2
sp|Q14974|IMB1_HUMAN	114.54	5	3	3	iTRAQ 4plex (K N-term)	97170	Importin subunit beta-1 OS=Homo sapiens GN=KPNB1 PE=1 SV=2
tr|H7C422|H7C422_HUMAN	114.16	14	3	3	iTRAQ 4plex (K N-term)	34968	60S ribosomal protein L3 (Fragment) OS=Homo sapiens GN=RPL3 PE=1 SV=1
tr|B5MCP9|B5MCP9_HUMAN	113.97	22	3	3	iTRAQ 4plex (K N-term)	21312	40S ribosomal protein S7 OS=Homo sapiens GN=RPS7 PE=1 SV=1
tr|A0A087WWU8|A0A087WWU8_HUMAN	113.43	24	8	3	iTRAQ 4plex (K N-term)	26421	Tropomyosin alpha-3 chain OS=Homo sapiens GN=TPM3 PE=1 SV=1
tr|J3KN67|J3KN67_HUMAN	113.43	19	8	3	iTRAQ 4plex (K N-term)	33223	Tropomyosin alpha-3 chain OS=Homo sapiens GN=TPM3 PE=1 SV=1
tr|F5H018|F5H018_HUMAN	113.26	23	5	5	iTRAQ 4plex (K N-term)	22535	GTP-binding nuclear protein Ran (Fragment) OS=Homo sapiens GN=RAN PE=1 SV=7
sp|P62826|RAN_HUMAN	113.26	21	5	5	iTRAQ 4plex (K N-term)	24423	GTP-binding nuclear protein Ran OS=Homo sapiens GN=RAN PE=1 SV=3
tr|J3KQE5|J3KQE5_HUMAN	113.26	19	5	5	iTRAQ 4plex (K N-term)	26816	GTP-binding nuclear protein Ran (Fragment) OS=Homo sapiens GN=RAN PE=1 SV=1
tr|B5MDF5|B5MDF5_HUMAN	113.26	19	5	5	iTRAQ 4plex (K N-term)	26224	GTP-binding nuclear protein Ran OS=Homo sapiens GN=RAN PE=1 SV=1
sp|P61204|ARF3_HUMAN	113.19	25	3	3	iTRAQ 4plex (K N-term); iTRAQ 4plex (Y)	20601	ADP-ribosylation factor 3 OS=Homo sapiens GN=ARF3 PE=1 SV=2
tr|E7ERL0|E7ERL0_HUMAN	113.03	27	4	4	Oxidation (M); iTRAQ 4plex (K N-term)	15261	Nucleoside diphosphate kinase A OS=Homo sapiens GN=NME1 PE=1 SV=1
sp|P15531|NDKA_HUMAN	113.03	25	4	4	Oxidation (M); iTRAQ 4plex (K N-term)	17149	Nucleoside diphosphate kinase A OS=Homo sapiens GN=NME1 PE=1 SV=1
tr|G3V1Y7|G3V1Y7_HUMAN	113.02	29	3	3	iTRAQ 4plex (K N-term)	13159	Myosin light polypeptide 6 OS=Homo sapiens GN=MYL6 PE=1 SV=1
tr|K7ENJ4|K7ENJ4_HUMAN	112.69	22	5	5	iTRAQ 4plex (K N-term)	21339	ATP synthase subunit alpha mitochondrial (Fragment) OS=Homo sapiens GN=ATP5A1 PE=1 SV=1
sp|P35268|RL22_HUMAN	112.54	39	3	3	Carbamidomethylation; iTRAQ 4plex (K N-term)	14787	60S ribosomal protein L22 OS=Homo sapiens GN=RPL22 PE=1 SV=2
tr|A8MVZ9|A8MVZ9_HUMAN	112.23	11	3	1	iTRAQ 4plex (K N-term); iTRAQ 4plex (Y)	36295	Fructose-bisphosphate aldolase OS=Homo sapiens GN=ALDOC PE=1 SV=1
sp|P09972|ALDOC_HUMAN	112.23	10	3	1	iTRAQ 4plex (K N-term); iTRAQ 4plex (Y)	39456	Fructose-bisphosphate aldolase C OS=Homo sapiens GN=ALDOC PE=1 SV=2
tr|H0YKZ7|H0YKZ7_HUMAN	112.05	30	3	1	iTRAQ 4plex (K N-term)	13010	Annexin (Fragment) OS=Homo sapiens GN=ANXA2 PE=1 SV=1
tr|H0YLV6|H0YLV6_HUMAN	112.05	27	3	1	iTRAQ 4plex (K N-term)	14429	Annexin OS=Homo sapiens GN=ANXA2 PE=1 SV=1
tr|H0YMT9|H0YMT9_HUMAN	112.05	27	3	1	iTRAQ 4plex (K N-term)	14469	Annexin (Fragment) OS=Homo sapiens GN=ANXA2 PE=1 SV=1
tr|H0YKX9|H0YKX9_HUMAN	112.05	27	3	1	iTRAQ 4plex (K N-term)	14557	Annexin (Fragment) OS=Homo sapiens GN=ANXA2 PE=1 SV=1
tr|H0YMW4|H0YMW4_HUMAN	112.05	25	3	1	iTRAQ 4plex (K N-term)	16177	Annexin (Fragment) OS=Homo sapiens GN=ANXA2 PE=1 SV=1
tr|K7EQJ5|K7EQJ5_HUMAN	112	29	2	2	Deamidation (NQ); iTRAQ 4plex (K N-term)	16571	40S ribosomal protein S15 OS=Homo sapiens GN=RPS15 PE=1 SV=2
sp|P62841|RS15_HUMAN	112	28	2	2	Deamidation (NQ); iTRAQ 4plex (K N-term)	17040	40S ribosomal protein S15 OS=Homo sapiens GN=RPS15 PE=1 SV=2
tr|K7ELC2|K7ELC2_HUMAN	112	27	2	2	Deamidation (NQ); iTRAQ 4plex (K N-term)	17723	40S ribosomal protein S15 OS=Homo sapiens GN=RPS15 PE=1 SV=1
tr|K7EJ78|K7EJ78_HUMAN	112	32	2	2	Deamidation (NQ); iTRAQ 4plex (K N-term)	14759	40S ribosomal protein S15 OS=Homo sapiens GN=RPS15 PE=1 SV=2
tr|E9PMM9|E9PMM9_HUMAN	111.75	26	6	6	iTRAQ 4plex (K N-term)	22975	40S ribosomal protein S2 (Fragment) OS=Homo sapiens GN=RPS2 PE=1 SV=1
tr|K7EQH4|K7EQH4_HUMAN	111.71	33	3	3	iTRAQ 4plex (K N-term)	11715	ATP synthase subunit alpha mitochondrial (Fragment) OS=Homo sapiens GN=ATP5A1 PE=1 SV=1
tr|H3BMQ8|H3BMQ8_HUMAN	111.62	42	7	6	iTRAQ 4plex (K N-term)	15463	Fructose-bisphosphate aldolase A (Fragment) OS=Homo sapiens GN=ALDOA PE=1 SV=1
sp|P20742|PZP_HUMAN	111.44	3	4	1	iTRAQ 4plex (K N-term); iTRAQ 4plex (Y)	163862	Pregnancy zone protein OS=Homo sapiens GN=PZP PE=1 SV=4
sp|P29762|RABP1_HUMAN	111.34	42	6	6	iTRAQ 4plex (K N-term)	15566	Cellular retinoic acid-binding protein 1 OS=Homo sapiens GN=CRABP1 PE=1 SV=2
sp|P62750|RL23A_HUMAN	110.82	29	6	6	Oxidation (M); iTRAQ 4plex (K N-term); iTRAQ 4plex (Y)	17695	60S ribosomal protein L23a OS=Homo sapiens GN=RPL23A PE=1 SV=1
tr|H7BY10|H7BY10_HUMAN	110.82	29	6	6	Oxidation (M); iTRAQ 4plex (K N-term); iTRAQ 4plex (Y)	17811	60S ribosomal protein L23a (Fragment) OS=Homo sapiens GN=RPL23A PE=1 SV=1
tr|K7EJV9|K7EJV9_HUMAN	110.82	27	6	6	Oxidation (M); iTRAQ 4plex (K N-term); iTRAQ 4plex (Y)	19374	60S ribosomal protein L23a (Fragment) OS=Homo sapiens GN=RPL23A PE=1 SV=1
tr|K7ERT8|K7ERT8_HUMAN	110.82	26	6	6	Oxidation (M); iTRAQ 4plex (K N-term); iTRAQ 4plex (Y)	19640	60S ribosomal protein L23a (Fragment) OS=Homo sapiens GN=RPL23A PE=1 SV=1
tr|A8MUS3|A8MUS3_HUMAN	110.82	24	6	6	Oxidation (M); iTRAQ 4plex (K N-term); iTRAQ 4plex (Y)	21916	60S ribosomal protein L23a OS=Homo sapiens GN=RPL23A PE=1 SV=1
tr|D6RGE0|D6RGE0_HUMAN	110.42	51	3	3	iTRAQ 4plex (K N-term)	7285	40S ribosomal protein S3a (Fragment) OS=Homo sapiens GN=RPS3A PE=1 SV=1
sp|P61313|RL15_HUMAN	110.37	29	5	5	iTRAQ 4plex (K N-term)	24146	60S ribosomal protein L15 OS=Homo sapiens GN=RPL15 PE=1 SV=2
tr|Q5HYB6|Q5HYB6_HUMAN	109.94	21	7	3	iTRAQ 4plex (K N-term)	27176	Epididymis luminal protein 189 OS=Homo sapiens GN=DKFZp686J1372 PE=1 SV=1
sp|Q9H4B7|TBB1_HUMAN	109.73	10	6	6	iTRAQ 4plex (K N-term)	50327	Tubulin beta-1 chain OS=Homo sapiens GN=TUBB1 PE=1 SV=1
sp|P84077|ARF1_HUMAN	109.54	25	3	3	iTRAQ 4plex (K N-term); iTRAQ 4plex (Y)	20697	ADP-ribosylation factor 1 OS=Homo sapiens GN=ARF1 PE=1 SV=2
tr|Q5TEC6|Q5TEC6_HUMAN	109.46	32	7	1	iTRAQ 4plex (K N-term); iTRAQ 4plex (Y)	15430	Histone H3 OS=Homo sapiens GN=HIST2H3PS2 PE=1 SV=1
tr|E9PL09|E9PL09_HUMAN	108.85	22	5	5	iTRAQ 4plex (K N-term)	25371	40S ribosomal protein S3 OS=Homo sapiens GN=RPS3 PE=1 SV=1
sp|P23396|RS3_HUMAN	108.85	21	5	5	iTRAQ 4plex (K N-term)	26688	40S ribosomal protein S3 OS=Homo sapiens GN=RPS3 PE=1 SV=2
sp|P15259|PGAM2_HUMAN	108.83	18	5	5	iTRAQ 4plex (K N-term)	28766	Phosphoglycerate mutase 2 OS=Homo sapiens GN=PGAM2 PE=1 SV=3
tr|H0YAF8|H0YAF8_HUMAN	108.82	16	3	3	iTRAQ 4plex (K N-term)	22053	Receptor of-activated protein C kinase 1 (Fragment) OS=Homo sapiens GN=RACK1 PE=1 SV=1
tr|D6RHH4|D6RHH4_HUMAN	108.82	14	3	3	iTRAQ 4plex (K N-term)	25869	Receptor of-activated protein C kinase 1 OS=Homo sapiens GN=RACK1 PE=1 SV=1
tr|J3KPE3|J3KPE3_HUMAN	108.82	12	3	3	iTRAQ 4plex (K N-term)	30104	Receptor of-activated protein C kinase 1 OS=Homo sapiens GN=RACK1 PE=1 SV=1
sp|P63244|RACK1_HUMAN	108.82	10	3	3	iTRAQ 4plex (K N-term)	35077	Receptor of activated protein C kinase 1 OS=Homo sapiens GN=RACK1 PE=1 SV=3
sp|P40429|RL13A_HUMAN	108.14	27	7	5	iTRAQ 4plex (K N-term); iTRAQ 4plex (Y)	23577	60S ribosomal protein L13a OS=Homo sapiens GN=RPL13A PE=1 SV=2
sp|P31946|1433B_HUMAN	108.08	21	7	1	Oxidation (M); iTRAQ 4plex (K N-term); iTRAQ 4plex (Y)	28082	14-3-3 protein beta/alpha OS=Homo sapiens GN=YWHAB PE=1 SV=3
sp|Q9BYZ2|LDH6B_HUMAN	107.79	8	4	2	iTRAQ 4plex (K N-term)	41943	L-lactate dehydrogenase A-like 6B OS=Homo sapiens GN=LDHAL6B PE=1 SV=3
sp|P12004|PCNA_HUMAN	107.53	16	5	5	Deamidation (NQ); iTRAQ 4plex (K N-term); iTRAQ 4plex (Y)	28769	Proliferating cell nuclear antigen OS=Homo sapiens GN=PCNA PE=1 SV=1
tr|M0R3H0|M0R3H0_HUMAN	107.28	21	2	2	iTRAQ 4plex (K N-term)	11075	40S ribosomal protein S16 OS=Homo sapiens GN=RPS16 PE=1 SV=1
tr|Q6IPX4|Q6IPX4_HUMAN	107.28	14	2	2	iTRAQ 4plex (K N-term)	17107	40S ribosomal protein S16 OS=Homo sapiens GN=RPS16 PE=1 SV=1
tr|H0YJ11|H0YJ11_HUMAN	107.18	18	3	1	iTRAQ 4plex (K N-term)	24382	Alpha-actinin-1 (Fragment) OS=Homo sapiens GN=ACTN1 PE=1 SV=1
tr|H7C5W8|H7C5W8_HUMAN	107.18	13	3	1	iTRAQ 4plex (K N-term)	34320	Alpha-actinin-1 (Fragment) OS=Homo sapiens GN=ACTN1 PE=1 SV=1
tr|Q5RI18|Q5RI18_HUMAN	107.11	18	4	4	Deamidation (NQ); iTRAQ 4plex (K N-term)	27405	Heterogeneous nuclear ribonucleoprotein U (Fragment) OS=Homo sapiens GN=HNRNPU PE=1 SV=7
tr|I3L397|I3L397_HUMAN	107.1	37	4	4	iTRAQ 4plex (K N-term)	16118	Eukaryotic translation initiation factor 5A (Fragment) OS=Homo sapiens GN=EIF5A PE=1 SV=7
sp|P63241|IF5A1_HUMAN	107.1	36	4	4	iTRAQ 4plex (K N-term)	16832	Eukaryotic translation initiation factor 5A-1 OS=Homo sapiens GN=EIF5A PE=1 SV=2
tr|I3L504|I3L504_HUMAN	107.1	30	4	4	iTRAQ 4plex (K N-term)	20504	Eukaryotic translation initiation factor 5A-1 OS=Homo sapiens GN=EIF5A PE=1 SV=1
sp|Q58FG1|HS904_HUMAN	106.88	7	3	1	iTRAQ 4plex (K N-term)	47712	Putative heat shock protein HSP 90-alpha A4 OS=Homo sapiens GN=HSP90AA4P PE=5 SV=1
sp|P52597|HNRPF_HUMAN	106.66	10	3	3	Deamidation (NQ); iTRAQ 4plex (K N-term); iTRAQ 4plex (Y)	45672	Heterogeneous nuclear ribonucleoprotein F OS=Homo sapiens GN=HNRNPF PE=1 SV=3
tr|F5H423|F5H423_HUMAN	106.52	19	2	2	iTRAQ 4plex (K N-term); iTRAQ 4plex (Y)	23346	Uncharacterized protein OS=Homo sapiens PE=3 SV=1
tr|B5MCW2|B5MCW2_HUMAN	106.29	15	3	3	iTRAQ 4plex (K N-term)	31243	60S ribosomal protein L3 (Fragment) OS=Homo sapiens GN=RPL3 PE=1 SV=1
sp|P19338|NUCL_HUMAN	106.26	7	6	6	Deamidation (NQ); iTRAQ 4plex (K N-term)	76615	Nucleolin OS=Homo sapiens GN=NCL PE=1 SV=3
sp|P23246|SFPQ_HUMAN	105.69	8	4	3	iTRAQ 4plex (K N-term)	76150	Splicing factor proline- and glutamine-rich OS=Homo sapiens GN=SFPQ PE=1 SV=2
sp|E9PAV3|NACAM_HUMAN	105.39	2	3	3	iTRAQ 4plex (K N-term)	205419	Nascent polypeptide-associated complex subunit alpha muscle-specific form OS=Homo sapiens GN=NACA PE=1 SV=1
tr|F8VZJ2|F8VZJ2_HUMAN	105.39	32	3	3	iTRAQ 4plex (K N-term)	15016	Nascent polypeptide-associated complex subunit alpha OS=Homo sapiens GN=NACA PE=1 SV=1
tr|H0YHX9|H0YHX9_HUMAN	105.39	20	3	3	iTRAQ 4plex (K N-term)	22944	Nascent polypeptide-associated complex subunit alpha (Fragment) OS=Homo sapiens GN=NACA PE=1 SV=1
sp|Q13765|NACA_HUMAN	105.39	20	3	3	iTRAQ 4plex (K N-term)	23384	Nascent polypeptide-associated complex subunit alpha OS=Homo sapiens GN=NACA PE=1 SV=1
tr|H7C3M2|H7C3M2_HUMAN	105.08	13	2	2	iTRAQ 4plex (K N-term)	29647	60S ribosomal protein L3 (Fragment) OS=Homo sapiens GN=RPL3 PE=1 SV=1
sp|P07205|PGK2_HUMAN	104.22	7	3	3	iTRAQ 4plex (K N-term)	44796	Phosphoglycerate kinase 2 OS=Homo sapiens GN=PGK2 PE=1 SV=3
tr|M0QYS1|M0QYS1_HUMAN	104.12	21	6	4	iTRAQ 4plex (K N-term); iTRAQ 4plex (Y)	24224	60S ribosomal protein L13a (Fragment) OS=Homo sapiens GN=RPL13A PE=1 SV=2
tr|F5H1C3|F5H1C3_HUMAN	103.56	30	2	1	iTRAQ 4plex (K N-term)	11203	Gamma-enolase (Fragment) OS=Homo sapiens GN=ENO2 PE=1 SV=1
tr|F8W0P7|F8W0P7_HUMAN	103.08	15	3	1	Deamidation (NQ); iTRAQ 4plex (K N-term)	28393	ATP synthase subunit beta mitochondrial (Fragment) OS=Homo sapiens GN=ATP5B PE=1 SV=2
sp|P01024|CO3_HUMAN	102.76	3	4	4	iTRAQ 4plex (K N-term)	187147	Complement C3 OS=Homo sapiens GN=C3 PE=1 SV=2
tr|E7EQV9|E7EQV9_HUMAN	102.73	29	4	4	iTRAQ 4plex (K N-term)	20510	Ribosomal protein L15 (Fragment) OS=Homo sapiens GN=RPL15 PE=1 SV=1
sp|O60361|NDK8_HUMAN	102.72	31	3	3	Deamidation (NQ); Oxidation (M); Pyro-glu from Q; iTRAQ 4plex (K N-term); iTRAQ 4plex (Y)	15529	Putative nucleoside diphosphate kinase OS=Homo sapiens GN=NME2P1 PE=5 SV=1
tr|K7EK07|K7EK07_HUMAN	102.64	52	8	1	Carbamidomethylation; iTRAQ 4plex (K N-term); iTRAQ 4plex (Y)	14914	Histone H3 (Fragment) OS=Homo sapiens GN=H3F3B PE=1 SV=1
sp|P84243|H33_HUMAN	102.64	50	8	1	Carbamidomethylation; iTRAQ 4plex (K N-term); iTRAQ 4plex (Y)	15328	Histone H3.3 OS=Homo sapiens GN=H3F3A PE=1 SV=2
tr|E9PPT0|E9PPT0_HUMAN	102.51	23	5	5	iTRAQ 4plex (K N-term)	21023	40S ribosomal protein S2 OS=Homo sapiens GN=RPS2 PE=1 SV=1
tr|H0YEU2|H0YEU2_HUMAN	102.46	25	4	4	iTRAQ 4plex (K N-term)	18680	40S ribosomal protein S3 (Fragment) OS=Homo sapiens GN=RPS3 PE=1 SV=1
tr|F8WCR1|F8WCR1_HUMAN	102.02	19	2	2	iTRAQ 4plex (K N-term)	19768	60S ribosomal protein L3 OS=Homo sapiens GN=RPL3 PE=1 SV=1
sp|P05387|RLA2_HUMAN	101.79	50	3	3	Deamidation (NQ); iTRAQ 4plex (K N-term)	11665	60S acidic ribosomal protein P2 OS=Homo sapiens GN=RPLP2 PE=1 SV=1
tr|C9J8F3|C9J8F3_HUMAN	101.44	20	2	1	iTRAQ 4plex (K N-term)	16341	Fructose-bisphosphate aldolase C (Fragment) OS=Homo sapiens GN=ALDOC PE=1 SV=1
tr|J3KSV6|J3KSV6_HUMAN	101.44	17	2	1	iTRAQ 4plex (K N-term)	19139	Fructose-bisphosphate aldolase C (Fragment) OS=Homo sapiens GN=ALDOC PE=1 SV=1
tr|J3QKP5|J3QKP5_HUMAN	101.44	17	2	1	iTRAQ 4plex (K N-term)	19699	Fructose-bisphosphate aldolase C (Fragment) OS=Homo sapiens GN=ALDOC PE=1 SV=2
tr|D6RDG3|D6RDG3_HUMAN	101.31	27	2	2	iTRAQ 4plex (K N-term)	11802	Transcription factor BTF3 (Fragment) OS=Homo sapiens GN=BTF3 PE=1 SV=3
sp|P20290|BTF3_HUMAN	101.31	14	2	2	iTRAQ 4plex (K N-term)	22168	Transcription factor BTF3 OS=Homo sapiens GN=BTF3 PE=1 SV=1
tr|J3KTA4|J3KTA4_HUMAN	101.11	7	3	3	iTRAQ 4plex (K N-term)	69087	Probable ATP-dependent RNA helicase DDX5 OS=Homo sapiens GN=DDX5 PE=1 SV=1
sp|P17844|DDX5_HUMAN	101.11	7	3	3	iTRAQ 4plex (K N-term)	69148	Probable ATP-dependent RNA helicase DDX5 OS=Homo sapiens GN=DDX5 PE=1 SV=1
sp|P39019|RS19_HUMAN	100.95	23	4	4	iTRAQ 4plex (K N-term)	16060	40S ribosomal protein S19 OS=Homo sapiens GN=RPS19 PE=1 SV=2
sp|Q8TD47|RS4Y2_HUMAN	100.8	14	4	4	iTRAQ 4plex (K N-term)	29295	40S ribosomal protein S4 Y isoform 2 OS=Homo sapiens GN=RPS4Y2 PE=2 SV=3
sp|P04083|ANXA1_HUMAN	100.62	9	3	3	iTRAQ 4plex (K N-term)	38714	Annexin A1 OS=Homo sapiens GN=ANXA1 PE=1 SV=2
sp|P67936|TPM4_HUMAN	100.4	16	6	1	iTRAQ 4plex (K N-term)	28522	Tropomyosin alpha-4 chain OS=Homo sapiens GN=TPM4 PE=1 SV=3
tr|M0R1M6|M0R1M6_HUMAN	100.2	26	4	4	iTRAQ 4plex (K N-term)	12803	Ubiquitin-60S ribosomal protein L40 (Fragment) OS=Homo sapiens GN=UBA52 PE=1 SV=1
tr|M0R2S1|M0R2S1_HUMAN	100.2	22	4	4	iTRAQ 4plex (K N-term)	15476	Ubiquitin-60S ribosomal protein L40 (Fragment) OS=Homo sapiens GN=UBA52 PE=1 SV=1
sp|P14136|GFAP_HUMAN	100.18	6	3	3	iTRAQ 4plex (K N-term); iTRAQ 4plex (Y)	49880	Glial fibrillary acidic protein OS=Homo sapiens GN=GFAP PE=1 SV=1
tr|Q5T987|Q5T987_HUMAN	99.54	11	4	3	iTRAQ 4plex (K N-term)	26821	Inter-alpha-trypsin inhibitor heavy chain H2 (Fragment) OS=Homo sapiens GN=ITIH2 PE=1 SV=1
tr|H7C5W5|H7C5W5_HUMAN	99.34	14	3	2	iTRAQ 4plex (K N-term); iTRAQ 4plex (Y)	22944	Peripherin (Fragment) OS=Homo sapiens GN=PRPH PE=1 SV=1
sp|P41219|PERI_HUMAN	99.34	6	3	2	iTRAQ 4plex (K N-term); iTRAQ 4plex (Y)	53651	Peripherin OS=Homo sapiens GN=PRPH PE=1 SV=2
tr|F6XY72|F6XY72_HUMAN	98.87	34	4	4	Pyro-glu from Q; iTRAQ 4plex (K N-term)	9583	HCG2001850 isoform CRA_c OS=Homo sapiens GN=NME2 PE=1 SV=2
tr|C9JEH7|C9JEH7_HUMAN	98.85	15	4	4	iTRAQ 4plex (K N-term)	29384	40S ribosomal protein S4 Y isoform 1 (Fragment) OS=Homo sapiens GN=RPS4Y1 PE=1 SV=1
sp|P22090|RS4Y1_HUMAN	98.85	15	4	4	iTRAQ 4plex (K N-term)	29456	40S ribosomal protein S4 Y isoform 1 OS=Homo sapiens GN=RPS4Y1 PE=1 SV=2
tr|F8VU65|F8VU65_HUMAN	98.38	13	4	4	iTRAQ 4plex (K N-term)	27188	60S acidic ribosomal protein P0 (Fragment) OS=Homo sapiens GN=RPLP0 PE=1 SV=1
tr|J3KSZ0|J3KSZ0_HUMAN	98.13	13	3	3	iTRAQ 4plex (K N-term)	26781	Eukaryotic initiation factor 4A-I (Fragment) OS=Homo sapiens GN=EIF4A1 PE=1 SV=1
sp|P61981|1433G_HUMAN	97.93	17	5	1	iTRAQ 4plex (K N-term); iTRAQ 4plex (Y)	28303	14-3-3 protein gamma OS=Homo sapiens GN=YWHAG PE=1 SV=2
sp|Q15233|NONO_HUMAN	97.93	13	6	5	iTRAQ 4plex (K N-term); iTRAQ 4plex (Y)	54232	Non-POU domain-containing octamer-binding protein OS=Homo sapiens GN=NONO PE=1 SV=4
tr|H7C144|H7C144_HUMAN	97.77	10	3	1	iTRAQ 4plex (K N-term)	39002	Alpha-actinin-4 (Fragment) OS=Homo sapiens GN=ACTN4 PE=1 SV=1
tr|F5GXS2|F5GXS2_HUMAN	97.77	7	3	1	iTRAQ 4plex (K N-term)	59564	Alpha-actinin-4 OS=Homo sapiens GN=ACTN4 PE=1 SV=2
tr|E9PPU1|E9PPU1_HUMAN	97.74	27	4	4	iTRAQ 4plex (K N-term)	17407	40S ribosomal protein S3 OS=Homo sapiens GN=RPS3 PE=1 SV=1
tr|C9J9K3|C9J9K3_HUMAN	97.59	8	2	2	iTRAQ 4plex (K N-term)	29506	40S ribosomal protein SA (Fragment) OS=Homo sapiens GN=RPSA PE=1 SV=7
sp|P08865|RSSA_HUMAN	97.59	7	2	2	iTRAQ 4plex (K N-term)	32854	40S ribosomal protein SA OS=Homo sapiens GN=RPSA PE=1 SV=4
tr|A0A0C4DG17|A0A0C4DG17_HUMAN	97.59	7	2	2	iTRAQ 4plex (K N-term)	33314	40S ribosomal protein SA OS=Homo sapiens GN=RPSA PE=1 SV=1
sp|P19105|ML12A_HUMAN	97.31	12	2	2	iTRAQ 4plex (K N-term)	19794	Myosin regulatory light chain 12A OS=Homo sapiens GN=MYL12A PE=1 SV=2
sp|O14950|ML12B_HUMAN	97.31	12	2	2	iTRAQ 4plex (K N-term)	19779	Myosin regulatory light chain 12B OS=Homo sapiens GN=MYL12B PE=1 SV=2
tr|J3QRS3|J3QRS3_HUMAN	97.31	11	2	2	iTRAQ 4plex (K N-term)	20457	Myosin regulatory light chain 12A OS=Homo sapiens GN=MYL12A PE=1 SV=1
tr|Q5SZU1|Q5SZU1_HUMAN	96.72	6	3	3	iTRAQ 4plex (K N-term)	53085	D-3-phosphoglycerate dehydrogenase OS=Homo sapiens GN=PHGDH PE=1 SV=1
sp|O43175|SERA_HUMAN	96.72	6	3	3	iTRAQ 4plex (K N-term)	56651	D-3-phosphoglycerate dehydrogenase OS=Homo sapiens GN=PHGDH PE=1 SV=4
tr|K7ENT6|K7ENT6_HUMAN	96.6	18	5	1	iTRAQ 4plex (K N-term)	20621	Tropomyosin alpha-4 chain (Fragment) OS=Homo sapiens GN=TPM4 PE=1 SV=1
sp|P62829|RL23_HUMAN	96.1	25	4	4	iTRAQ 4plex (K N-term)	14865	60S ribosomal protein L23 OS=Homo sapiens GN=RPL23 PE=1 SV=1
tr|V9GYG0|V9GYG0_HUMAN	95.47	21	5	1	iTRAQ 4plex (K N-term); iTRAQ 4plex (Y)	22885	ADP/ATP translocase 1 OS=Homo sapiens GN=SLC25A4 PE=1 SV=1
tr|K7EMH1|K7EMH1_HUMAN	95.36	27	2	2	iTRAQ 4plex (K N-term)	10422	60S ribosomal protein L22 (Fragment) OS=Homo sapiens GN=RPL22 PE=1 SV=1
tr|K7ERI7|K7ERI7_HUMAN	95.36	25	2	2	iTRAQ 4plex (K N-term)	11169	60S ribosomal protein L22 OS=Homo sapiens GN=RPL22 PE=1 SV=1
tr|K7ELC4|K7ELC4_HUMAN	95.36	30	2	2	iTRAQ 4plex (K N-term)	9099	60S ribosomal protein L22 (Fragment) OS=Homo sapiens GN=RPL22 PE=1 SV=1
tr|K7EJT5|K7EJT5_HUMAN	95.36	51	2	2	iTRAQ 4plex (K N-term)	5083	60S ribosomal protein L22 (Fragment) OS=Homo sapiens GN=RPL22 PE=1 SV=1
tr|K7EP65|K7EP65_HUMAN	95.36	50	2	2	iTRAQ 4plex (K N-term)	5239	60S ribosomal protein L22 (Fragment) OS=Homo sapiens GN=RPL22 PE=1 SV=1
tr|K7EKS7|K7EKS7_HUMAN	95.36	45	2	2	iTRAQ 4plex (K N-term)	5734	60S ribosomal protein L22 OS=Homo sapiens GN=RPL22 PE=1 SV=1
tr|K7ESA0|K7ESA0_HUMAN	95.33	36	2	2	iTRAQ 4plex (K N-term)	8264	ATP synthase subunit alpha mitochondrial OS=Homo sapiens GN=ATP5A1 PE=1 SV=1
tr|F8VZU9|F8VZU9_HUMAN	94.85	24	2	2	iTRAQ 4plex (K N-term)	11677	Myosin light polypeptide 6 OS=Homo sapiens GN=MYL6 PE=1 SV=1
tr|F8W180|F8W180_HUMAN	94.85	13	2	2	iTRAQ 4plex (K N-term)	22094	Myosin light polypeptide 6 OS=Homo sapiens GN=MYL6 PE=1 SV=1
tr|K7EKH5|K7EKH5_HUMAN	94.52	22	2	1	iTRAQ 4plex (K N-term)	15035	Fructose-bisphosphate aldolase C (Fragment) OS=Homo sapiens GN=ALDOC PE=1 SV=1
tr|D6RAU2|D6RAU2_HUMAN	94.4	16	2	2	iTRAQ 4plex (K N-term)	16404	Receptor of-activated protein C kinase 1 OS=Homo sapiens GN=RACK1 PE=1 SV=1
tr|E9PD14|E9PD14_HUMAN	94.4	15	2	2	iTRAQ 4plex (K N-term)	17013	Receptor of-activated protein C kinase 1 OS=Homo sapiens GN=RACK1 PE=1 SV=1
tr|D6RFX4|D6RFX4_HUMAN	94.4	12	2	2	iTRAQ 4plex (K N-term)	21449	Receptor of-activated protein C kinase 1 (Fragment) OS=Homo sapiens GN=RACK1 PE=1 SV=1
tr|D6RFZ9|D6RFZ9_HUMAN	94.4	12	2	2	iTRAQ 4plex (K N-term)	21936	Receptor of-activated protein C kinase 1 (Fragment) OS=Homo sapiens GN=RACK1 PE=1 SV=7
tr|D6R9Z1|D6R9Z1_HUMAN	94.4	10	2	2	iTRAQ 4plex (K N-term)	26420	Receptor of-activated protein C kinase 1 (Fragment) OS=Homo sapiens GN=RACK1 PE=1 SV=7
tr|H0Y8W2|H0Y8W2_HUMAN	94.4	8	2	2	iTRAQ 4plex (K N-term)	30271	Receptor of-activated protein C kinase 1 (Fragment) OS=Homo sapiens GN=RACK1 PE=1 SV=1
tr|D6R9L0|D6R9L0_HUMAN	94.4	8	2	2	iTRAQ 4plex (K N-term)	32574	Receptor of-activated protein C kinase 1 (Fragment) OS=Homo sapiens GN=RACK1 PE=1 SV=1
tr|H0Y9Y1|H0Y9Y1_HUMAN	94.1	34	2	2	iTRAQ 4plex (K N-term)	9508	Transcription factor BTF3 (Fragment) OS=Homo sapiens GN=BTF3 PE=1 SV=2
tr|M0R2D3|M0R2D3_HUMAN	94.03	15	3	3	iTRAQ 4plex (K N-term)	17400	Tubulin beta-4A chain (Fragment) OS=Homo sapiens GN=TUBB4A PE=1 SV=1
sp|P23526|SAHH_HUMAN	93.99	10	3	3	iTRAQ 4plex (K N-term)	47716	Adenosylhomocysteinase OS=Homo sapiens GN=AHCY PE=1 SV=4
sp|P35749|MYH11_HUMAN	93.94	2	3	1	Pyro-glu from Q; iTRAQ 4plex (K N-term)	227337	Myosin-11 OS=Homo sapiens GN=MYH11 PE=1 SV=3
tr|B1PS43|B1PS43_HUMAN	93.94	1	3	1	Pyro-glu from Q; iTRAQ 4plex (K N-term)	234234	Myosin heavy chain 11 smooth muscle isoform OS=Homo sapiens GN=MYH11 PE=1 SV=1
sp|Q9NR30|DDX21_HUMAN	93.83	5	3	3	iTRAQ 4plex (K N-term)	87344	Nucleolar RNA helicase 2 OS=Homo sapiens GN=DDX21 PE=1 SV=5
tr|D6RD18|D6RD18_HUMAN	93.79	8	2	2	iTRAQ 4plex (K N-term)	30474	Heterogeneous nuclear ribonucleoprotein A/B OS=Homo sapiens GN=HNRNPAB PE=1 SV=1
tr|B5MCB5|B5MCB5_HUMAN	93.74	35	4	4	iTRAQ 4plex (K N-term)	12279	Cellular retinoic acid-binding protein 1 (Fragment) OS=Homo sapiens GN=CRABP1 PE=1 SV=2
tr|A0A087WUI2|A0A087WUI2_HUMAN	93.31	16	3	2	iTRAQ 4plex (K N-term)	29836	Heterogeneous nuclear ribonucleoproteins A2/B1 OS=Homo sapiens GN=HNRNPA2B1 PE=1 SV=1
tr|C9J0D1|C9J0D1_HUMAN	93.27	21	3	1	iTRAQ 4plex (K N-term)	13163	Histone H2A OS=Homo sapiens GN=H2AFV PE=1 SV=1
sp|P46783|RS10_HUMAN	93.25	15	3	2	iTRAQ 4plex (K N-term)	18898	40S ribosomal protein S10 OS=Homo sapiens GN=RPS10 PE=1 SV=1
tr|F6U211|F6U211_HUMAN	93.25	15	3	2	iTRAQ 4plex (K N-term)	19868	40S ribosomal protein S10 OS=Homo sapiens GN=RPS10 PE=4 SV=1
tr|S4R435|S4R435_HUMAN	93.25	9	3	2	iTRAQ 4plex (K N-term)	32596	Protein RPS10-NUDT3 (Fragment) OS=Homo sapiens GN=RPS10-NUDT3 PE=4 SV=1
sp|P62942|FKB1A_HUMAN	93.07	25	2	2	iTRAQ 4plex (K N-term)	11951	Peptidyl-prolyl cis-trans isomerase FKBP1A OS=Homo sapiens GN=FKBP1A PE=1 SV=2
tr|K7EK45|K7EK45_HUMAN	92.74	9	1	1	iTRAQ 4plex (K N-term)	27233	Polypyrimidine tract-binding protein 1 (Fragment) OS=Homo sapiens GN=PTBP1 PE=1 SV=1
tr|J3QSA3|J3QSA3_HUMAN	92.48	51	2	2	iTRAQ 4plex (K N-term)	4854	Polyubiquitin-B (Fragment) OS=Homo sapiens GN=UBB PE=1 SV=1
tr|H7BZJ3|H7BZJ3_HUMAN	92.18	23	3	3	iTRAQ 4plex (K N-term); iTRAQ 4plex (Y)	13519	Protein disulfide-isomerase A3 (Fragment) OS=Homo sapiens GN=PDIA3 PE=1 SV=1
tr|F8VV59|F8VV59_HUMAN	92.04	6	2	1	iTRAQ 4plex (K N-term)	38029	Nucleosome assembly protein 1-like 1 OS=Homo sapiens GN=NAP1L1 PE=1 SV=1
tr|F8W543|F8W543_HUMAN	92.04	6	2	1	iTRAQ 4plex (K N-term)	38200	Nucleosome assembly protein 1-like 1 OS=Homo sapiens GN=NAP1L1 PE=1 SV=1
tr|B7Z9C2|B7Z9C2_HUMAN	92.04	6	2	1	iTRAQ 4plex (K N-term)	40512	Nucleosome assembly protein 1-like 1 OS=Homo sapiens GN=NAP1L1 PE=1 SV=1
tr|F8W0J6|F8W0J6_HUMAN	92.04	6	2	1	iTRAQ 4plex (K N-term)	43868	Nucleosome assembly protein 1-like 1 OS=Homo sapiens GN=NAP1L1 PE=1 SV=1
tr|F5H4R6|F5H4R6_HUMAN	92.04	5	2	1	iTRAQ 4plex (K N-term)	44627	Nucleosome assembly protein 1-like 1 OS=Homo sapiens GN=NAP1L1 PE=1 SV=1
tr|H0YIV4|H0YIV4_HUMAN	92.04	5	2	1	iTRAQ 4plex (K N-term)	44714	Nucleosome assembly protein 1-like 1 (Fragment) OS=Homo sapiens GN=NAP1L1 PE=1 SV=1
sp|P55209|NP1L1_HUMAN	92.04	5	2	1	iTRAQ 4plex (K N-term)	45374	Nucleosome assembly protein 1-like 1 OS=Homo sapiens GN=NAP1L1 PE=1 SV=1
tr|H0YH88|H0YH88_HUMAN	92.04	12	2	1	iTRAQ 4plex (K N-term)	21086	Nucleosome assembly protein 1-like 1 (Fragment) OS=Homo sapiens GN=NAP1L1 PE=1 SV=1
tr|H0YHC3|H0YHC3_HUMAN	92.04	11	2	1	iTRAQ 4plex (K N-term)	23418	Nucleosome assembly protein 1-like 1 (Fragment) OS=Homo sapiens GN=NAP1L1 PE=1 SV=1
tr|F8W020|F8W020_HUMAN	92.04	10	2	1	iTRAQ 4plex (K N-term)	24366	Nucleosome assembly protein 1-like 1 (Fragment) OS=Homo sapiens GN=NAP1L1 PE=1 SV=1
tr|F8W118|F8W118_HUMAN	92.04	10	2	1	iTRAQ 4plex (K N-term)	24694	Nucleosome assembly protein 1-like 1 (Fragment) OS=Homo sapiens GN=NAP1L1 PE=1 SV=1
tr|F8VXI6|F8VXI6_HUMAN	92.04	10	2	1	iTRAQ 4plex (K N-term)	24998	Nucleosome assembly protein 1-like 1 (Fragment) OS=Homo sapiens GN=NAP1L1 PE=1 SV=1
tr|F8VUX1|F8VUX1_HUMAN	92.04	9	2	1	iTRAQ 4plex (K N-term)	27724	Nucleosome assembly protein 1-like 1 (Fragment) OS=Homo sapiens GN=NAP1L1 PE=1 SV=1
tr|F8VY35|F8VY35_HUMAN	92.04	8	2	1	iTRAQ 4plex (K N-term)	31021	Nucleosome assembly protein 1-like 1 (Fragment) OS=Homo sapiens GN=NAP1L1 PE=1 SV=1
tr|H0YKL9|H0YKL9_HUMAN	91.84	23	2	1	iTRAQ 4plex (K N-term)	12064	Annexin (Fragment) OS=Homo sapiens GN=ANXA2 PE=1 SV=1
tr|E5RHP0|E5RHP0_HUMAN	91.39	26	3	3	iTRAQ 4plex (K N-term)	9371	Nucleoside diphosphate kinase A OS=Homo sapiens GN=NME1 PE=3 SV=1
tr|C9K028|C9K028_HUMAN	91.39	35	3	3	iTRAQ 4plex (K N-term)	6527	Nucleoside diphosphate kinase A (Fragment) OS=Homo sapiens GN=NME1 PE=1 SV=1
tr|F8W0W4|F8W0W4_HUMAN	90.99	14	2	2	iTRAQ 4plex (K N-term)	21482	Nascent polypeptide-associated complex subunit alpha (Fragment) OS=Homo sapiens GN=NACA PE=1 SV=1
tr|H0Y9Y4|H0Y9Y4_HUMAN	90.67	14	4	4	iTRAQ 4plex (K N-term)	23528	40S ribosomal protein S3a (Fragment) OS=Homo sapiens GN=RPS3A PE=1 SV=1
tr|Q8J015|Q8J015_HUMAN	90.06	18	3	2	iTRAQ 4plex (K N-term); iTRAQ 4plex (Y)	16731	60S ribosomal protein L13a OS=Homo sapiens GN=RPL13a PE=1 SV=1
sp|Q00610|CLH1_HUMAN	90.02	2	2	2	iTRAQ 4plex (K N-term)	191613	Clathrin heavy chain 1 OS=Homo sapiens GN=CLTC PE=1 SV=5
tr|A0A087WVQ6|A0A087WVQ6_HUMAN	90.02	2	2	2	iTRAQ 4plex (K N-term)	192057	Clathrin heavy chain OS=Homo sapiens GN=CLTC PE=1 SV=1
tr|A0A0C4DGC5|A0A0C4DGC5_HUMAN	89.84	22	4	4	Deamidation (NQ); iTRAQ 4plex (K N-term)	27536	Prelamin-A/C (Fragment) OS=Homo sapiens GN=LMNA PE=1 SV=1
sp|P06703|S10A6_HUMAN	89.46	37	4	4	iTRAQ 4plex (K N-term)	10180	Protein S100-A6 OS=Homo sapiens GN=S100A6 PE=1 SV=1
tr|K7EJU1|K7EJU1_HUMAN	89.39	6	2	2	iTRAQ 4plex (K N-term); iTRAQ 4plex (Y)	28453	Glial fibrillary acidic protein (Fragment) OS=Homo sapiens GN=GFAP PE=1 SV=1
tr|J3KTJ8|J3KTJ8_HUMAN	89.04	25	3	3	iTRAQ 4plex (K N-term); iTRAQ 4plex (Y)	11597	60S ribosomal protein L26 (Fragment) OS=Homo sapiens GN=RPL26 PE=4 SV=7
tr|J3QRI7|J3QRI7_HUMAN	89.04	22	3	3	iTRAQ 4plex (K N-term); iTRAQ 4plex (Y)	12630	60S ribosomal protein L26 (Fragment) OS=Homo sapiens GN=RPL26 PE=4 SV=1
tr|J3QQQ9|J3QQQ9_HUMAN	89.04	22	3	3	iTRAQ 4plex (K N-term); iTRAQ 4plex (Y)	12692	Uncharacterized protein OS=Homo sapiens PE=4 SV=1
tr|J3QQV1|J3QQV1_HUMAN	89.04	22	3	3	iTRAQ 4plex (K N-term); iTRAQ 4plex (Y)	12934	60S ribosomal protein L26 OS=Homo sapiens GN=RPL26 PE=4 SV=1
tr|E5RIT6|E5RIT6_HUMAN	89.04	19	3	3	iTRAQ 4plex (K N-term); iTRAQ 4plex (Y)	15207	60S ribosomal protein L26-like 1 (Fragment) OS=Homo sapiens GN=RPL26L1 PE=1 SV=1
tr|J3QRC4|J3QRC4_HUMAN	89.04	18	3	3	iTRAQ 4plex (K N-term); iTRAQ 4plex (Y)	15759	60S ribosomal protein L26 (Fragment) OS=Homo sapiens GN=RPL26 PE=4 SV=1
sp|Q9UNX3|RL26L_HUMAN	89.04	17	3	3	iTRAQ 4plex (K N-term); iTRAQ 4plex (Y)	17256	60S ribosomal protein L26-like 1 OS=Homo sapiens GN=RPL26L1 PE=1 SV=1
sp|P61254|RL26_HUMAN	89.04	17	3	3	iTRAQ 4plex (K N-term); iTRAQ 4plex (Y)	17258	60S ribosomal protein L26 OS=Homo sapiens GN=RPL26 PE=1 SV=1
tr|E7ENU7|E7ENU7_HUMAN	88.63	24	3	3	iTRAQ 4plex (K N-term)	20495	Ribosomal protein L15 (Fragment) OS=Homo sapiens GN=RPL15 PE=1 SV=1
sp|P24534|EF1B_HUMAN	88.38	13	3	3	iTRAQ 4plex (K N-term)	24764	Elongation factor 1-beta OS=Homo sapiens GN=EEF1B2 PE=1 SV=3
tr|F5H0C7|F5H0C7_HUMAN	88.35	21	1	1	iTRAQ 4plex (K N-term); iTRAQ 4plex (Y)	11619	ADP-ribosylation factor 3 (Fragment) OS=Homo sapiens GN=ARF3 PE=3 SV=1
tr|I3L404|I3L404_HUMAN	88.13	28	5	5	iTRAQ 4plex (K N-term)	16566	40S ribosomal protein S2 (Fragment) OS=Homo sapiens GN=RPS2 PE=1 SV=1
tr|E9PM36|E9PM36_HUMAN	88.13	21	5	5	iTRAQ 4plex (K N-term)	21613	40S ribosomal protein S2 OS=Homo sapiens GN=RPS2 PE=1 SV=1
tr|C9IZL7|C9IZL7_HUMAN	88.1	23	4	3	iTRAQ 4plex (K N-term); iTRAQ 4plex (Y)	23673	Non-POU domain-containing octamer-binding protein (Fragment) OS=Homo sapiens GN=NONO PE=1 SV=1
sp|P62899|RL31_HUMAN	87.92	22	3	3	iTRAQ 4plex (K N-term)	14463	60S ribosomal protein L31 OS=Homo sapiens GN=RPL31 PE=1 SV=1
tr|Q4VY20|Q4VY20_HUMAN	87.9	43	4	1	iTRAQ 4plex (K N-term); iTRAQ 4plex (Y)	8428	14-3-3 protein beta/alpha (Fragment) OS=Homo sapiens GN=YWHAB PE=1 SV=1
tr|Q4VY19|Q4VY19_HUMAN	87.9	32	4	1	iTRAQ 4plex (K N-term); iTRAQ 4plex (Y)	11549	14-3-3 protein beta/alpha (Fragment) OS=Homo sapiens GN=YWHAB PE=1 SV=1
tr|A0A0J9YWE8|A0A0J9YWE8_HUMAN	87.9	21	4	1	iTRAQ 4plex (K N-term); iTRAQ 4plex (Y)	17410	14-3-3 protein beta/alpha OS=Homo sapiens GN=YWHAB PE=1 SV=1
tr|Q5T3N1|Q5T3N1_HUMAN	87.78	12	2	2	iTRAQ 4plex (K N-term)	22755	Annexin (Fragment) OS=Homo sapiens GN=ANXA1 PE=1 SV=1
tr|H7BZ94|H7BZ94_HUMAN	87.71	9	4	4	iTRAQ 4plex (K N-term)	52502	Protein disulfide-isomerase OS=Homo sapiens GN=P4HB PE=1 SV=2
sp|P07237|PDIA1_HUMAN	87.71	8	4	4	iTRAQ 4plex (K N-term)	57116	Protein disulfide-isomerase OS=Homo sapiens GN=P4HB PE=1 SV=3
tr|M0QZ52|M0QZ52_HUMAN	87.65	35	2	2	iTRAQ 4plex (K N-term)	9354	Calmodulin OS=Homo sapiens GN=CALM3 PE=1 SV=1
sp|P62158|CALM_HUMAN	87.65	19	2	2	iTRAQ 4plex (K N-term)	16838	Calmodulin OS=Homo sapiens GN=CALM1 PE=1 SV=2
tr|E7ETZ0|E7ETZ0_HUMAN	87.65	19	2	2	iTRAQ 4plex (K N-term)	16966	Calmodulin OS=Homo sapiens GN=CALM1 PE=1 SV=1
tr|H0Y7A7|H0Y7A7_HUMAN	87.65	16	2	2	iTRAQ 4plex (K N-term)	20762	Calmodulin (Fragment) OS=Homo sapiens GN=CALM2 PE=1 SV=1
tr|E7EMB3|E7EMB3_HUMAN	87.65	15	2	2	iTRAQ 4plex (K N-term)	21689	Calmodulin OS=Homo sapiens GN=CALM2 PE=1 SV=1
tr|E5RI98|E5RI98_HUMAN	87.45	25	2	2	Deamidation (NQ); Oxidation (M); iTRAQ 4plex (K N-term)	11865	Nucleophosmin (Fragment) OS=Homo sapiens GN=NPM1 PE=1 SV=1
tr|J3KTJ3|J3KTJ3_HUMAN	86.76	33	3	3	iTRAQ 4plex (K N-term)	8899	60S ribosomal protein L23 OS=Homo sapiens GN=RPL23 PE=1 SV=1
sp|P62280|RS11_HUMAN	86.7	21	5	5	iTRAQ 4plex (K N-term)	18431	40S ribosomal protein S11 OS=Homo sapiens GN=RPS11 PE=1 SV=3
sp|Q16555|DPYL2_HUMAN	86.67	9	3	1	iTRAQ 4plex (K N-term)	62294	Dihydropyrimidinase-related protein 2 OS=Homo sapiens GN=DPYSL2 PE=1 SV=1
sp|P62851|RS25_HUMAN	86.6	21	3	3	iTRAQ 4plex (K N-term)	13742	40S ribosomal protein S25 OS=Homo sapiens GN=RPS25 PE=1 SV=1
tr|Q5VU61|Q5VU61_HUMAN	86.33	20	6	3	iTRAQ 4plex (K N-term)	26056	Tropomyosin alpha-3 chain OS=Homo sapiens GN=TPM3 PE=1 SV=2
tr|E7ERJ7|E7ERJ7_HUMAN	86.08	8	3	3	iTRAQ 4plex (K N-term)	67139	Polyadenylate-binding protein OS=Homo sapiens GN=PABPC1 PE=1 SV=1
sp|P11940|PABP1_HUMAN	86.08	7	3	3	iTRAQ 4plex (K N-term)	70671	Polyadenylate-binding protein 1 OS=Homo sapiens GN=PABPC1 PE=1 SV=2
tr|Q5JR95|Q5JR95_HUMAN	85.88	14	3	3	iTRAQ 4plex (K N-term)	21880	40S ribosomal protein S8 OS=Homo sapiens GN=RPS8 PE=1 SV=1
sp|P62241|RS8_HUMAN	85.88	13	3	3	iTRAQ 4plex (K N-term)	24205	40S ribosomal protein S8 OS=Homo sapiens GN=RPS8 PE=1 SV=2
sp|P62854|RS26_HUMAN	85.52	21	2	2	iTRAQ 4plex (K N-term)	13015	40S ribosomal protein S26 OS=Homo sapiens GN=RPS26 PE=1 SV=3
sp|P31949|S10AB_HUMAN	85.42	22	2	2	iTRAQ 4plex (K N-term)	11740	Protein S100-A11 OS=Homo sapiens GN=S100A11 PE=1 SV=2
sp|Q6IS14|IF5AL_HUMAN	85.32	16	2	2	iTRAQ 4plex (K N-term)	16773	Eukaryotic translation initiation factor 5A-1-like OS=Homo sapiens GN=EIF5AL1 PE=2 SV=2
sp|P51991|ROA3_HUMAN	85.08	8	4	3	iTRAQ 4plex (K N-term)	39595	Heterogeneous nuclear ribonucleoprotein A3 OS=Homo sapiens GN=HNRNPA3 PE=1 SV=2
tr|F2Z2S8|F2Z2S8_HUMAN	84.96	22	3	3	iTRAQ 4plex (K N-term)	13069	40S ribosomal protein S3 OS=Homo sapiens GN=RPS3 PE=1 SV=1
tr|H0YF32|H0YF32_HUMAN	84.96	21	3	3	iTRAQ 4plex (K N-term)	13515	40S ribosomal protein S3 (Fragment) OS=Homo sapiens GN=RPS3 PE=1 SV=1
tr|E9PQ96|E9PQ96_HUMAN	84.96	29	3	3	iTRAQ 4plex (K N-term)	10279	40S ribosomal protein S3 OS=Homo sapiens GN=RPS3 PE=1 SV=1
tr|H0YCJ7|H0YCJ7_HUMAN	84.96	19	3	3	iTRAQ 4plex (K N-term)	15003	40S ribosomal protein S3 (Fragment) OS=Homo sapiens GN=RPS3 PE=1 SV=1
tr|E9PK82|E9PK82_HUMAN	84.96	20	3	3	iTRAQ 4plex (K N-term)	14318	40S ribosomal protein S3 (Fragment) OS=Homo sapiens GN=RPS3 PE=1 SV=1
tr|E9PJH4|E9PJH4_HUMAN	84.96	23	3	3	iTRAQ 4plex (K N-term)	12941	40S ribosomal protein S3 OS=Homo sapiens GN=RPS3 PE=1 SV=1
sp|P62424|RL7A_HUMAN	84.89	11	3	3	iTRAQ 4plex (K N-term)	29996	60S ribosomal protein L7a OS=Homo sapiens GN=RPL7A PE=1 SV=2
tr|K7EKH6|K7EKH6_HUMAN	84.83	9	2	2	iTRAQ 4plex (K N-term); iTRAQ 4plex (Y)	22544	Glial fibrillary acidic protein (Fragment) OS=Homo sapiens GN=GFAP PE=1 SV=1
tr|M0QZC5|M0QZC5_HUMAN	84.48	28	5	5	iTRAQ 4plex (K N-term)	13997	40S ribosomal protein S11 OS=Homo sapiens GN=RPS11 PE=1 SV=1
tr|A2A3R7|A2A3R7_HUMAN	84.42	25	2	2	iTRAQ 4plex (K N-term)	10415	40S ribosomal protein S6 OS=Homo sapiens GN=RPS6 PE=1 SV=1
sp|Q01518|CAP1_HUMAN	83.98	4	1	1	iTRAQ 4plex (K N-term)	51902	Adenylyl cyclase-associated protein 1 OS=Homo sapiens GN=CAP1 PE=1 SV=5
tr|Q5T0R7|Q5T0R7_HUMAN	83.98	11	1	1	iTRAQ 4plex (K N-term)	19202	Adenylyl cyclase-associated protein (Fragment) OS=Homo sapiens GN=CAP1 PE=1 SV=1
tr|Q5T0R6|Q5T0R6_HUMAN	83.98	11	1	1	iTRAQ 4plex (K N-term)	19416	Adenylyl cyclase-associated protein (Fragment) OS=Homo sapiens GN=CAP1 PE=1 SV=1
tr|Q5T0R5|Q5T0R5_HUMAN	83.98	11	1	1	iTRAQ 4plex (K N-term)	19909	Adenylyl cyclase-associated protein (Fragment) OS=Homo sapiens GN=CAP1 PE=1 SV=7
tr|Q5T0R4|Q5T0R4_HUMAN	83.98	9	1	1	iTRAQ 4plex (K N-term)	22633	Adenylyl cyclase-associated protein (Fragment) OS=Homo sapiens GN=CAP1 PE=1 SV=7
tr|Q5T0R3|Q5T0R3_HUMAN	83.98	9	1	1	iTRAQ 4plex (K N-term)	22734	Adenylyl cyclase-associated protein (Fragment) OS=Homo sapiens GN=CAP1 PE=1 SV=1
tr|Q5T0R2|Q5T0R2_HUMAN	83.98	9	1	1	iTRAQ 4plex (K N-term)	23249	Adenylyl cyclase-associated protein (Fragment) OS=Homo sapiens GN=CAP1 PE=1 SV=1
tr|Q5T0R1|Q5T0R1_HUMAN	83.98	9	1	1	iTRAQ 4plex (K N-term)	23930	Adenylyl cyclase-associated protein (Fragment) OS=Homo sapiens GN=CAP1 PE=1 SV=1
tr|Q5T0R9|Q5T0R9_HUMAN	83.98	7	1	1	iTRAQ 4plex (K N-term)	28692	Adenylyl cyclase-associated protein (Fragment) OS=Homo sapiens GN=CAP1 PE=1 SV=7
tr|E7ESK7|E7ESK7_HUMAN	83.65	17	3	1	iTRAQ 4plex (K N-term); iTRAQ 4plex (Y)	15697	14-3-3 protein zeta/delta (Fragment) OS=Homo sapiens GN=YWHAZ PE=1 SV=1
tr|A0A087WTT1|A0A087WTT1_HUMAN	83.5	9	3	3	iTRAQ 4plex (K N-term)	58536	Polyadenylate-binding protein OS=Homo sapiens GN=PABPC1 PE=1 SV=1
sp|Q32P51|RA1L2_HUMAN	83.16	17	5	3	iTRAQ 4plex (K N-term)	34225	Heterogeneous nuclear ribonucleoprotein A1-like 2 OS=Homo sapiens GN=HNRNPA1L2 PE=2 SV=2
tr|C9J0S9|C9J0S9_HUMAN	83.09	36	1	1	Oxidation (M); iTRAQ 4plex (K N-term)	6365	60 kDa heat shock protein mitochondrial (Fragment) OS=Homo sapiens GN=HSPD1 PE=1 SV=1
tr|C9J1Z8|C9J1Z8_HUMAN	82.26	14	1	1	iTRAQ 4plex (K N-term); iTRAQ 4plex (Y)	17107	ADP-ribosylation factor 5 (Fragment) OS=Homo sapiens GN=ARF5 PE=1 SV=1
sp|P84085|ARF5_HUMAN	82.26	12	1	1	iTRAQ 4plex (K N-term); iTRAQ 4plex (Y)	20530	ADP-ribosylation factor 5 OS=Homo sapiens GN=ARF5 PE=1 SV=2
tr|F6RFD5|F6RFD5_HUMAN	82.17	13	2	1	iTRAQ 4plex (K N-term); iTRAQ 4plex (Y)	15397	Destrin OS=Homo sapiens GN=DSTN PE=1 SV=1
sp|P60981|DEST_HUMAN	82.17	11	2	1	iTRAQ 4plex (K N-term); iTRAQ 4plex (Y)	18506	Destrin OS=Homo sapiens GN=DSTN PE=1 SV=3
sp|P26373|RL13_HUMAN	81.95	16	4	4	iTRAQ 4plex (K N-term)	24261	60S ribosomal protein L13 OS=Homo sapiens GN=RPL13 PE=1 SV=4
tr|F8WCJ1|F8WCJ1_HUMAN	81.44	19	2	2	iTRAQ 4plex (K N-term)	11688	Eukaryotic translation initiation factor 5A OS=Homo sapiens GN=EIF5A2 PE=1 SV=1
tr|C9J7B5|C9J7B5_HUMAN	81.44	18	2	2	iTRAQ 4plex (K N-term)	11945	Eukaryotic translation initiation factor 5A OS=Homo sapiens GN=EIF5A2 PE=1 SV=1
tr|C9J4W5|C9J4W5_HUMAN	81.44	17	2	2	iTRAQ 4plex (K N-term)	12821	Eukaryotic translation initiation factor 5A (Fragment) OS=Homo sapiens GN=EIF5A2 PE=1 SV=1
sp|Q9GZV4|IF5A2_HUMAN	81.44	13	2	2	iTRAQ 4plex (K N-term)	16793	Eukaryotic translation initiation factor 5A-2 OS=Homo sapiens GN=EIF5A2 PE=1 SV=3
tr|C9JW96|C9JW96_HUMAN	81.29	16	2	2	iTRAQ 4plex (K N-term)	26892	Prohibitin (Fragment) OS=Homo sapiens GN=PHB PE=1 SV=2
sp|P35232|PHB_HUMAN	81.29	15	2	2	iTRAQ 4plex (K N-term)	29804	Prohibitin OS=Homo sapiens GN=PHB PE=1 SV=1
tr|Q5T8U3|Q5T8U3_HUMAN	81.17	15	3	3	iTRAQ 4plex (K N-term)	21545	60S ribosomal protein L7a (Fragment) OS=Homo sapiens GN=RPL7A PE=1 SV=1
sp|P68871|HBB_HUMAN	81.01	13	2	2	iTRAQ 4plex (K N-term); iTRAQ 4plex (Y)	15998	Hemoglobin subunit beta OS=Homo sapiens GN=HBB PE=1 SV=2
tr|H7BY16|H7BY16_HUMAN	80.94	8	3	3	Deamidation (NQ); iTRAQ 4plex (K N-term)	32447	Nucleolin (Fragment) OS=Homo sapiens GN=NCL PE=1 SV=7
tr|F8WD59|F8WD59_HUMAN	80.73	11	1	1	iTRAQ 4plex (K N-term)	12648	40S ribosomal protein SA (Fragment) OS=Homo sapiens GN=RPSA PE=1 SV=2
tr|A8MXP9|A8MXP9_HUMAN	80.62	4	2	2	iTRAQ 4plex (K N-term)	99967	Matrin-3 OS=Homo sapiens GN=MATR3 PE=1 SV=1
tr|E5RIR4|E5RIR4_HUMAN	80.59	31	3	1	iTRAQ 4plex (K N-term); iTRAQ 4plex (Y)	8434	14-3-3 protein zeta/delta (Fragment) OS=Homo sapiens GN=YWHAZ PE=1 SV=1
tr|E9PD24|E9PD24_HUMAN	80.59	25	3	1	iTRAQ 4plex (K N-term); iTRAQ 4plex (Y)	10612	14-3-3 protein zeta/delta (Fragment) OS=Homo sapiens GN=YWHAZ PE=1 SV=1
tr|E7EVZ2|E7EVZ2_HUMAN	80.59	23	3	1	iTRAQ 4plex (K N-term); iTRAQ 4plex (Y)	11270	14-3-3 protein zeta/delta (Fragment) OS=Homo sapiens GN=YWHAZ PE=1 SV=1
sp|P23528|COF1_HUMAN	80.34	19	3	2	iTRAQ 4plex (K N-term); iTRAQ 4plex (Y)	18502	Cofilin-1 OS=Homo sapiens GN=CFL1 PE=1 SV=3
tr|E9PK25|E9PK25_HUMAN	80.34	16	3	2	iTRAQ 4plex (K N-term); iTRAQ 4plex (Y)	22728	Cofilin-1 OS=Homo sapiens GN=CFL1 PE=1 SV=1
sp|P41091|IF2G_HUMAN	80.33	8	2	2	iTRAQ 4plex (K N-term); iTRAQ 4plex (Y)	51110	Eukaryotic translation initiation factor 2 subunit 3 OS=Homo sapiens GN=EIF2S3 PE=1 SV=3
tr|B8ZZL8|B8ZZL8_HUMAN	80.26	25	3	3	iTRAQ 4plex (K N-term)	10690	10 kDa heat shock protein mitochondrial OS=Homo sapiens GN=HSPE1 PE=1 SV=1
sp|P61604|CH10_HUMAN	80.26	25	3	3	iTRAQ 4plex (K N-term)	10932	10 kDa heat shock protein mitochondrial OS=Homo sapiens GN=HSPE1 PE=1 SV=2
tr|H7C3T4|H7C3T4_HUMAN	80.24	12	2	1	Pyro-glu from Q; iTRAQ 4plex (K N-term)	18334	Peroxiredoxin-4 (Fragment) OS=Homo sapiens GN=PRDX4 PE=1 SV=1
sp|Q13162|PRDX4_HUMAN	80.24	7	2	1	Pyro-glu from Q; iTRAQ 4plex (K N-term)	30540	Peroxiredoxin-4 OS=Homo sapiens GN=PRDX4 PE=1 SV=1
sp|P60228|EIF3E_HUMAN	80.12	8	2	2	iTRAQ 4plex (K N-term)	52221	Eukaryotic translation initiation factor 3 subunit E OS=Homo sapiens GN=EIF3E PE=1 SV=1
sp|P08708|RS17_HUMAN	80.08	16	1	1	iTRAQ 4plex (K N-term)	15550	40S ribosomal protein S17 OS=Homo sapiens GN=RPS17 PE=1 SV=2
tr|J3KSS0|J3KSS0_HUMAN	80.07	27	2	2	iTRAQ 4plex (K N-term)	7575	60S ribosomal protein L26 OS=Homo sapiens GN=RPL26 PE=4 SV=1
tr|H0YEP8|H0YEP8_HUMAN	80.01	45	2	2	Deamidation (NQ); iTRAQ 4plex (K N-term); iTRAQ 4plex (Y)	6617	Serpin H1 (Fragment) OS=Homo sapiens GN=SERPINH1 PE=1 SV=1
sp|P32119|PRDX2_HUMAN	79.85	9	2	1	iTRAQ 4plex (K N-term)	21892	Peroxiredoxin-2 OS=Homo sapiens GN=PRDX2 PE=1 SV=5
tr|E5RGW4|E5RGW4_HUMAN	79.79	37	2	2	iTRAQ 4plex (K N-term)	6863	Nucleophosmin (Fragment) OS=Homo sapiens GN=NPM1 PE=1 SV=1
sp|Q6NVV1|R13P3_HUMAN	78.44	19	2	2	iTRAQ 4plex (K N-term); iTRAQ 4plex (Y)	12135	Putative 60S ribosomal protein L13a protein RPL13AP3 OS=Homo sapiens GN=RPL13AP3 PE=5 SV=1
sp|P02765|FETUA_HUMAN	78.38	9	4	4	Carbamidomethylation; iTRAQ 4plex (K N-term)	39325	Alpha-2-HS-glycoprotein OS=Homo sapiens GN=AHSG PE=1 SV=1
tr|B4DV51|B4DV51_HUMAN	78.34	18	3	3	iTRAQ 4plex (K N-term)	14731	GTP-binding nuclear protein Ran OS=Homo sapiens GN=RAN PE=1 SV=1
tr|E9PHT9|E9PHT9_HUMAN	78.31	10	2	2	iTRAQ 4plex (K N-term)	18224	Annexin OS=Homo sapiens GN=ANXA5 PE=1 SV=1
sp|P07737|PROF1_HUMAN	78.24	22	3	3	iTRAQ 4plex (K N-term)	15054	Profilin-1 OS=Homo sapiens GN=PFN1 PE=1 SV=2
tr|E7EQV3|E7EQV3_HUMAN	78.04	6	2	2	iTRAQ 4plex (K N-term)	65748	Polyadenylate-binding protein OS=Homo sapiens GN=PABPC1 PE=1 SV=1
tr|E9PKZ0|E9PKZ0_HUMAN	77.85	11	3	3	iTRAQ 4plex (K N-term)	22389	60S ribosomal protein L8 (Fragment) OS=Homo sapiens GN=RPL8 PE=1 SV=1
tr|E9PKU4|E9PKU4_HUMAN	77.85	10	3	3	iTRAQ 4plex (K N-term)	25594	60S ribosomal protein L8 (Fragment) OS=Homo sapiens GN=RPL8 PE=1 SV=1
sp|P62917|RL8_HUMAN	77.85	9	3	3	iTRAQ 4plex (K N-term)	28025	60S ribosomal protein L8 OS=Homo sapiens GN=RPL8 PE=1 SV=2
tr|R4GN98|R4GN98_HUMAN	77.71	28	3	3	iTRAQ 4plex (K N-term)	9681	Protein S100 (Fragment) OS=Homo sapiens GN=S100A6 PE=1 SV=1
sp|P37837|TALDO_HUMAN	77.56	6	2	2	iTRAQ 4plex (K N-term)	37540	Transaldolase OS=Homo sapiens GN=TALDO1 PE=1 SV=2
tr|F2Z393|F2Z393_HUMAN	77.56	6	2	2	iTRAQ 4plex (K N-term)	35329	Transaldolase OS=Homo sapiens GN=TALDO1 PE=1 SV=1
sp|P30613|KPYR_HUMAN	77.32	2	1	1	iTRAQ 4plex (K N-term)	61830	Pyruvate kinase PKLR OS=Homo sapiens GN=PKLR PE=1 SV=2
sp|P09382|LEG1_HUMAN	76.42	15	2	2	Carbamidomethylation; iTRAQ 4plex (K N-term)	14716	Galectin-1 OS=Homo sapiens GN=LGALS1 PE=1 SV=2
tr|F8VVM2|F8VVM2_HUMAN	76.01	8	3	3	iTRAQ 4plex (K N-term)	36161	Phosphate carrier protein mitochondrial OS=Homo sapiens GN=SLC25A3 PE=1 SV=1
sp|Q00325|MPCP_HUMAN	76.01	7	3	3	iTRAQ 4plex (K N-term)	40095	Phosphate carrier protein mitochondrial OS=Homo sapiens GN=SLC25A3 PE=1 SV=2
sp|P62277|RS13_HUMAN	75.74	19	3	3	iTRAQ 4plex (K N-term); iTRAQ 4plex (Y)	17222	40S ribosomal protein S13 OS=Homo sapiens GN=RPS13 PE=1 SV=2
sp|P02042|HBD_HUMAN	75.56	13	2	2	iTRAQ 4plex (K N-term); iTRAQ 4plex (Y)	16055	Hemoglobin subunit delta OS=Homo sapiens GN=HBD PE=1 SV=2
tr|E9PFT6|E9PFT6_HUMAN	75.56	13	2	2	iTRAQ 4plex (K N-term); iTRAQ 4plex (Y)	15420	Hemoglobin subunit delta OS=Homo sapiens GN=HBD PE=1 SV=1
tr|I3NI03|I3NI03_HUMAN	75.52	19	3	3	iTRAQ 4plex (K N-term)	18513	Protein disulfide-isomerase (Fragment) OS=Homo sapiens GN=P4HB PE=1 SV=1
sp|Q15637|SF01_HUMAN	75.26	3	1	1	iTRAQ 4plex (K N-term)	68330	Splicing factor 1 OS=Homo sapiens GN=SF1 PE=1 SV=4
tr|G3V1A1|G3V1A1_HUMAN	75.19	14	3	3	iTRAQ 4plex (K N-term)	18169	60S ribosomal protein L8 OS=Homo sapiens GN=RPL8 PE=1 SV=1
tr|F8VQ14|F8VQ14_HUMAN	75.07	14	3	3	Pyro-glu from Q; iTRAQ 4plex (K N-term)	44813	T-complex protein 1 subunit beta OS=Homo sapiens GN=CCT2 PE=1 SV=1
tr|M0R117|M0R117_HUMAN	75	11	2	2	iTRAQ 4plex (K N-term)	18079	60S ribosomal protein L18a OS=Homo sapiens GN=RPL18A PE=1 SV=1
tr|M0R1A7|M0R1A7_HUMAN	75	12	2	2	iTRAQ 4plex (K N-term)	17477	60S ribosomal protein L18a OS=Homo sapiens GN=RPL18A PE=1 SV=1
sp|Q02543|RL18A_HUMAN	75	10	2	2	iTRAQ 4plex (K N-term)	20762	60S ribosomal protein L18a OS=Homo sapiens GN=RPL18A PE=1 SV=2
tr|M0R3D6|M0R3D6_HUMAN	75	12	2	2	iTRAQ 4plex (K N-term)	16715	60S ribosomal protein L18a (Fragment) OS=Homo sapiens GN=RPL18A PE=1 SV=1
tr|G3V1A4|G3V1A4_HUMAN	74.96	21	3	2	iTRAQ 4plex (K N-term); iTRAQ 4plex (Y)	16812	Cofilin 1 (Non-muscle) isoform CRA_a OS=Homo sapiens GN=CFL1 PE=1 SV=1
sp|P62263|RS14_HUMAN	74.65	16	2	2	iTRAQ 4plex (K N-term)	16273	40S ribosomal protein S14 OS=Homo sapiens GN=RPS14 PE=1 SV=3
tr|E5RHH1|E5RHH1_HUMAN	74.46	44	2	2	iTRAQ 4plex (K N-term)	4684	60S ribosomal protein L26-like 1 (Fragment) OS=Homo sapiens GN=RPL26L1 PE=1 SV=7
sp|Q8N0Y7|PGAM4_HUMAN	74.39	13	3	3	iTRAQ 4plex (K N-term)	28777	Probable phosphoglycerate mutase 4 OS=Homo sapiens GN=PGAM4 PE=3 SV=1
tr|H7C2E7|H7C2E7_HUMAN	74.13	32	1	1	iTRAQ 4plex (K N-term)	9818	Filamin-A (Fragment) OS=Homo sapiens GN=FLNA PE=1 SV=1
tr|H0Y5F3|H0Y5F3_HUMAN	74.13	12	1	1	iTRAQ 4plex (K N-term)	25109	Filamin-A (Fragment) OS=Homo sapiens GN=FLNA PE=1 SV=1
sp|P01008|ANT3_HUMAN	74.02	6	4	4	iTRAQ 4plex (K N-term)	52602	Antithrombin-III OS=Homo sapiens GN=SERPINC1 PE=1 SV=1
tr|A8MXH2|A8MXH2_HUMAN	73.91	13	2	1	iTRAQ 4plex (K N-term)	18152	Nucleosome assembly protein 1-like 4 (Fragment) OS=Homo sapiens GN=NAP1L4 PE=1 SV=2
tr|C9J6D1|C9J6D1_HUMAN	73.91	12	2	1	iTRAQ 4plex (K N-term)	20261	Nucleosome assembly protein 1-like 4 (Fragment) OS=Homo sapiens GN=NAP1L4 PE=1 SV=1
tr|C9JZI7|C9JZI7_HUMAN	73.91	8	2	1	iTRAQ 4plex (K N-term)	31840	Nucleosome assembly protein 1-like 4 (Fragment) OS=Homo sapiens GN=NAP1L4 PE=1 SV=1
sp|Q99733|NP1L4_HUMAN	73.91	6	2	1	iTRAQ 4plex (K N-term)	42823	Nucleosome assembly protein 1-like 4 OS=Homo sapiens GN=NAP1L4 PE=1 SV=1
tr|H0YAM7|H0YAM7_HUMAN	73.88	5	1	1	iTRAQ 4plex (K N-term)	27424	Receptor of-activated protein C kinase 1 (Fragment) OS=Homo sapiens GN=RACK1 PE=1 SV=1
sp|P61353|RL27_HUMAN	73.54	12	2	2	iTRAQ 4plex (K N-term); iTRAQ 4plex (Y)	15798	60S ribosomal protein L27 OS=Homo sapiens GN=RPL27 PE=1 SV=2
sp|P28074|PSB5_HUMAN	73.43	5	1	1	iTRAQ 4plex (K N-term)	28480	Proteasome subunit beta type-5 OS=Homo sapiens GN=PSMB5 PE=1 SV=3
tr|H0YJM8|H0YJM8_HUMAN	73.43	11	1	1	iTRAQ 4plex (K N-term)	12866	Proteasome subunit beta type-5 (Fragment) OS=Homo sapiens GN=PSMB5 PE=1 SV=1
tr|A0A0B4J1R6|A0A0B4J1R6_HUMAN	73.38	6	2	2	Deamidation (NQ); iTRAQ 4plex (K N-term)	49910	Transketolase OS=Homo sapiens GN=TKT PE=1 SV=1
sp|P29401|TKT_HUMAN	73.38	4	2	2	Deamidation (NQ); iTRAQ 4plex (K N-term)	67878	Transketolase OS=Homo sapiens GN=TKT PE=1 SV=3
tr|E5RJX2|E5RJX2_HUMAN	73.04	18	1	1	iTRAQ 4plex (K N-term)	6828	40S ribosomal protein S20 OS=Homo sapiens GN=RPS20 PE=1 SV=1
sp|P60866|RS20_HUMAN	73.04	9	1	1	iTRAQ 4plex (K N-term)	13373	40S ribosomal protein S20 OS=Homo sapiens GN=RPS20 PE=1 SV=1
tr|B8ZZK4|B8ZZK4_HUMAN	72.98	22	2	2	iTRAQ 4plex (K N-term)	8988	60S ribosomal protein L31 OS=Homo sapiens GN=RPL31 PE=1 SV=1
tr|H7C2W9|H7C2W9_HUMAN	72.98	16	2	2	iTRAQ 4plex (K N-term)	12820	60S ribosomal protein L31 (Fragment) OS=Homo sapiens GN=RPL31 PE=1 SV=1
tr|C9JU56|C9JU56_HUMAN	72.98	15	2	2	iTRAQ 4plex (K N-term)	13336	60S ribosomal protein L31 (Fragment) OS=Homo sapiens GN=RPL31 PE=1 SV=1
tr|B7Z4E3|B7Z4E3_HUMAN	72.98	14	2	2	iTRAQ 4plex (K N-term)	13955	60S ribosomal protein L31 OS=Homo sapiens GN=RPL31 PE=1 SV=1
tr|B7Z4C8|B7Z4C8_HUMAN	72.98	13	2	2	iTRAQ 4plex (K N-term)	15119	60S ribosomal protein L31 OS=Homo sapiens GN=RPL31 PE=1 SV=1
tr|C9JPM4|C9JPM4_HUMAN	72.89	17	1	1	iTRAQ 4plex (K N-term); iTRAQ 4plex (Y)	14553	ADP-ribosylation factor 4 (Fragment) OS=Homo sapiens GN=ARF4 PE=1 SV=1
sp|P18085|ARF4_HUMAN	72.89	12	1	1	iTRAQ 4plex (K N-term); iTRAQ 4plex (Y)	20511	ADP-ribosylation factor 4 OS=Homo sapiens GN=ARF4 PE=1 SV=3
tr|F2Z388|F2Z388_HUMAN	72.62	18	2	2	iTRAQ 4plex (K N-term)	10645	60S ribosomal protein L35 OS=Homo sapiens GN=RPL35 PE=1 SV=1
sp|P42766|RL35_HUMAN	72.62	14	2	2	iTRAQ 4plex (K N-term)	14551	60S ribosomal protein L35 OS=Homo sapiens GN=RPL35 PE=1 SV=2
sp|P17987|TCPA_HUMAN	72.59	8	3	3	iTRAQ 4plex (K N-term)	60344	T-complex protein 1 subunit alpha OS=Homo sapiens GN=TCP1 PE=1 SV=1
tr|H0Y5C6|H0Y5C6_HUMAN	72.33	9	2	1	iTRAQ 4plex (K N-term)	29859	Filamin-A (Fragment) OS=Homo sapiens GN=FLNA PE=1 SV=1
tr|E7EX53|E7EX53_HUMAN	72.19	19	2	2	iTRAQ 4plex (K N-term)	15722	Ribosomal protein L15 (Fragment) OS=Homo sapiens GN=RPL15 PE=1 SV=1
tr|G3V203|G3V203_HUMAN	71.96	16	3	2	iTRAQ 4plex (K N-term)	18756	60S ribosomal protein L18 OS=Homo sapiens GN=RPL18 PE=1 SV=1
sp|Q07020|RL18_HUMAN	71.96	14	3	2	iTRAQ 4plex (K N-term)	21634	60S ribosomal protein L18 OS=Homo sapiens GN=RPL18 PE=1 SV=2
tr|J3QQ67|J3QQ67_HUMAN	71.96	14	3	2	iTRAQ 4plex (K N-term)	21847	60S ribosomal protein L18 (Fragment) OS=Homo sapiens GN=RPL18 PE=1 SV=1
tr|J3QSB4|J3QSB4_HUMAN	71.78	22	3	3	iTRAQ 4plex (K N-term)	14692	60S ribosomal protein L13 (Fragment) OS=Homo sapiens GN=RPL13 PE=1 SV=1
tr|F8VTQ5|F8VTQ5_HUMAN	70.79	23	3	2	iTRAQ 4plex (K N-term)	16536	Heterogeneous nuclear ribonucleoprotein A1 (Fragment) OS=Homo sapiens GN=HNRNPA1 PE=1 SV=1
tr|Q96HY3|Q96HY3_HUMAN	70.11	19	1	1	iTRAQ 4plex (K N-term)	12876	CALM1 protein OS=Homo sapiens GN=CALM1 PE=1 SV=1
tr|A0A0H2UH34|A0A0H2UH34_HUMAN	69.82	16	4	3	iTRAQ 4plex (K N-term)	18140	Peptidyl-prolyl cis-trans isomerase OS=Homo sapiens GN=PPIAL4F PE=3 SV=1
sp|A0A0B4J2A2|PAL4C_HUMAN	69.82	16	4	3	iTRAQ 4plex (K N-term)	18156	Peptidyl-prolyl cis-trans isomerase A-like 4C OS=Homo sapiens GN=PPIAL4C PE=2 SV=1
tr|A0A075B767|A0A075B767_HUMAN	69.82	16	4	3	iTRAQ 4plex (K N-term)	18208	Peptidyl-prolyl cis-trans isomerase OS=Homo sapiens GN=LOC105371242 PE=3 SV=1
sp|P0DN37|PAL4G_HUMAN	69.82	16	4	3	iTRAQ 4plex (K N-term)	18166	Peptidyl-prolyl cis-trans isomerase A-like 4G OS=Homo sapiens GN=PPIAL4G PE=3 SV=1
sp|A0A075B759|PAL4E_HUMAN	69.82	16	4	3	iTRAQ 4plex (K N-term)	18197	Peptidyl-prolyl cis-trans isomerase A-like 4E OS=Homo sapiens GN=PPIAL4E PE=3 SV=1
sp|F5H284|PAL4D_HUMAN	69.82	16	4	3	iTRAQ 4plex (K N-term)	18167	Peptidyl-prolyl cis-trans isomerase A-like 4D OS=Homo sapiens GN=PPIAL4D PE=3 SV=1
tr|J3QR48|J3QR48_HUMAN	68.93	18	2	2	iTRAQ 4plex (K N-term)	16485	Importin subunit beta-1 (Fragment) OS=Homo sapiens GN=KPNB1 PE=1 SV=7
tr|K7EM56|K7EM56_HUMAN	68.5	17	1	1	Deamidation (NQ); iTRAQ 4plex (K N-term)	12990	40S ribosomal protein S15 OS=Homo sapiens GN=RPS15 PE=1 SV=2
tr|A0A0B4J2B4|A0A0B4J2B4_HUMAN	68.5	16	1	1	Deamidation (NQ); iTRAQ 4plex (K N-term)	13742	40S ribosomal protein S15 OS=Homo sapiens GN=RPS15 PE=1 SV=1
tr|S4R417|S4R417_HUMAN	68.5	14	1	1	Deamidation (NQ); iTRAQ 4plex (K N-term)	15580	40S ribosomal protein S15 OS=Homo sapiens GN=RPS15 PE=1 SV=1
tr|C9JYS8|C9JYS8_HUMAN	68.38	9	3	3	iTRAQ 4plex (K N-term)	29622	Non-POU domain-containing octamer-binding protein (Fragment) OS=Homo sapiens GN=NONO PE=1 SV=7
tr|I3L3U6|I3L3U6_HUMAN	68.12	13	2	2	iTRAQ 4plex (K N-term)	20689	Protein disulfide-isomerase (Fragment) OS=Homo sapiens GN=P4HB PE=1 SV=1
sp|P07196|NFL_HUMAN	67.1	2	1	1	iTRAQ 4plex (K N-term); iTRAQ 4plex (Y)	61517	Neurofilament light polypeptide OS=Homo sapiens GN=NEFL PE=1 SV=3
tr|A0A087WYG8|A0A087WYG8_HUMAN	67.1	2	1	1	iTRAQ 4plex (K N-term); iTRAQ 4plex (Y)	55064	Alpha-internexin OS=Homo sapiens GN=INA PE=1 SV=1
sp|Q16352|AINX_HUMAN	67.1	2	1	1	iTRAQ 4plex (K N-term); iTRAQ 4plex (Y)	55391	Alpha-internexin OS=Homo sapiens GN=INA PE=1 SV=2
tr|E7ESP9|E7ESP9_HUMAN	67.1	1	1	1	iTRAQ 4plex (K N-term); iTRAQ 4plex (Y)	98381	Neurofilament medium polypeptide OS=Homo sapiens GN=NEFM PE=1 SV=1
sp|P07197|NFM_HUMAN	67.1	1	1	1	iTRAQ 4plex (K N-term); iTRAQ 4plex (Y)	102472	Neurofilament medium polypeptide OS=Homo sapiens GN=NEFM PE=1 SV=3
tr|E7EMV2|E7EMV2_HUMAN	67.1	1	1	1	iTRAQ 4plex (K N-term); iTRAQ 4plex (Y)	78882	Neurofilament medium polypeptide OS=Homo sapiens GN=NEFM PE=1 SV=1
sp|P12036|NFH_HUMAN	67.1	1	1	1	iTRAQ 4plex (K N-term); iTRAQ 4plex (Y)	112479	Neurofilament heavy polypeptide OS=Homo sapiens GN=NEFH PE=1 SV=4
sp|Q9NTK5|OLA1_HUMAN	66.92	4	1	1	iTRAQ 4plex (K N-term)	44744	Obg-like ATPase 1 OS=Homo sapiens GN=OLA1 PE=1 SV=2
tr|J3KQ32|J3KQ32_HUMAN	66.92	4	1	1	iTRAQ 4plex (K N-term)	46938	Obg-like ATPase 1 OS=Homo sapiens GN=OLA1 PE=1 SV=1
tr|C9JTK6|C9JTK6_HUMAN	66.92	13	1	1	iTRAQ 4plex (K N-term)	12302	Obg-like ATPase 1 (Fragment) OS=Homo sapiens GN=OLA1 PE=1 SV=1
tr|E5RIP1|E5RIP1_HUMAN	66.19	24	1	1	iTRAQ 4plex (K N-term)	5429	40S ribosomal protein S20 OS=Homo sapiens GN=RPS20 PE=1 SV=1
tr|F8W1I5|F8W1I5_HUMAN	65.71	7	1	1	iTRAQ 4plex (K N-term)	19036	Myosin light chain 6B OS=Homo sapiens GN=MYL6B PE=1 SV=1
sp|P14649|MYL6B_HUMAN	65.71	6	1	1	iTRAQ 4plex (K N-term)	22764	Myosin light chain 6B OS=Homo sapiens GN=MYL6B PE=1 SV=1
tr|M0R1M5|M0R1M5_HUMAN	65.61	12	1	1	iTRAQ 4plex (K N-term)	9366	40S ribosomal protein S16 (Fragment) OS=Homo sapiens GN=RPS16 PE=1 SV=1
tr|M0R1H6|M0R1H6_HUMAN	65.31	20	3	3	iTRAQ 4plex (K N-term)	10123	40S ribosomal protein S11 OS=Homo sapiens GN=RPS11 PE=1 SV=1
tr|H7C367|H7C367_HUMAN	65.06	6	2	1	iTRAQ 4plex (K N-term)	28310	Non-POU domain-containing octamer-binding protein (Fragment) OS=Homo sapiens GN=NONO PE=1 SV=7
tr|G3V576|G3V576_HUMAN	65	10	3	3	iTRAQ 4plex (K N-term)	25257	Heterogeneous nuclear ribonucleoproteins C1/C2 OS=Homo sapiens GN=HNRNPC PE=1 SV=1
tr|G3V4W0|G3V4W0_HUMAN	65	9	3	3	iTRAQ 4plex (K N-term)	28916	Heterogeneous nuclear ribonucleoproteins C1/C2 (Fragment) OS=Homo sapiens GN=HNRNPC PE=1 SV=1
tr|B4DY08|B4DY08_HUMAN	65	8	3	3	iTRAQ 4plex (K N-term)	31972	Heterogeneous nuclear ribonucleoproteins C1/C2 OS=Homo sapiens GN=HNRNPC PE=1 SV=1
tr|B2R5W2|B2R5W2_HUMAN	65	8	3	3	iTRAQ 4plex (K N-term)	31948	Heterogeneous nuclear ribonucleoproteins C1/C2 OS=Homo sapiens GN=HNRNPC PE=1 SV=1
tr|G3V4C1|G3V4C1_HUMAN	65	8	3	3	iTRAQ 4plex (K N-term)	32238	Heterogeneous nuclear ribonucleoproteins C1/C2 OS=Homo sapiens GN=HNRNPC PE=1 SV=1
tr|G3V2Q1|G3V2Q1_HUMAN	65	8	3	3	iTRAQ 4plex (K N-term)	33571	Heterogeneous nuclear ribonucleoproteins C1/C2 OS=Homo sapiens GN=HNRNPC PE=1 SV=1
sp|P07910|HNRPC_HUMAN	65	8	3	3	iTRAQ 4plex (K N-term)	33670	Heterogeneous nuclear ribonucleoproteins C1/C2 OS=Homo sapiens GN=HNRNPC PE=1 SV=4
sp|P14174|MIF_HUMAN	64.95	16	2	2	iTRAQ 4plex (K N-term)	12476	Macrophage migration inhibitory factor OS=Homo sapiens GN=MIF PE=1 SV=4
tr|F8W1N5|F8W1N5_HUMAN	64.77	21	1	1	iTRAQ 4plex (K N-term)	7813	Nascent polypeptide-associated complex subunit alpha (Fragment) OS=Homo sapiens GN=NACA PE=1 SV=1
tr|F8VNW4|F8VNW4_HUMAN	64.77	10	1	1	iTRAQ 4plex (K N-term)	16080	Nascent polypeptide-associated complex subunit alpha (Fragment) OS=Homo sapiens GN=NACA PE=1 SV=1
tr|K7EL50|K7EL50_HUMAN	63.98	18	1	1	iTRAQ 4plex (K N-term)	19149	Calreticulin (Fragment) OS=Homo sapiens GN=CALR PE=1 SV=1
tr|Q1JUQ5|Q1JUQ5_HUMAN	63.66	15	1	1	iTRAQ 4plex (K N-term)	10119	Peptidyl-prolyl cis-trans isomerase OS=Homo sapiens GN=FKBP12-Exip2 PE=1 SV=1
tr|Q5W0X3|Q5W0X3_HUMAN	63.66	14	1	1	iTRAQ 4plex (K N-term)	11424	Peptidyl-prolyl cis-trans isomerase OS=Homo sapiens GN=FKBP1A PE=1 SV=1
tr|F8VUA6|F8VUA6_HUMAN	63.6	15	2	2	iTRAQ 4plex (K N-term)	14529	60S ribosomal protein L18 (Fragment) OS=Homo sapiens GN=RPL18 PE=1 SV=1
tr|H0YHA7|H0YHA7_HUMAN	63.6	11	2	2	iTRAQ 4plex (K N-term)	18982	60S ribosomal protein L18 (Fragment) OS=Homo sapiens GN=RPL18 PE=1 SV=1
sp|P50991|TCPD_HUMAN	63.55	5	3	3	iTRAQ 4plex (K N-term)	57924	T-complex protein 1 subunit delta OS=Homo sapiens GN=CCT4 PE=1 SV=4
tr|S4R3N1|S4R3N1_HUMAN	62.57	6	2	2	iTRAQ 4plex (K N-term)	29737	Protein HSPE1-MOB4 OS=Homo sapiens GN=HSPE1-MOB4 PE=3 SV=1
tr|E7ETK0|E7ETK0_HUMAN	62.43	15	2	2	iTRAQ 4plex (K N-term)	15197	40S ribosomal protein S24 OS=Homo sapiens GN=RPS24 PE=1 SV=1
tr|A0A087WUS0|A0A087WUS0_HUMAN	62.43	14	2	2	iTRAQ 4plex (K N-term)	15353	40S ribosomal protein S24 OS=Homo sapiens GN=RPS24 PE=1 SV=1
sp|P62847|RS24_HUMAN	62.43	14	2	2	iTRAQ 4plex (K N-term)	15423	40S ribosomal protein S24 OS=Homo sapiens GN=RPS24 PE=1 SV=1
tr|G3V5W4|G3V5W4_HUMAN	62.38	15	1	1	iTRAQ 4plex (K N-term)	10831	Tubulin beta-3 chain OS=Homo sapiens GN=TUBB3 PE=1 SV=1
tr|G3V2R8|G3V2R8_HUMAN	62.38	13	1	1	iTRAQ 4plex (K N-term)	13583	HCG1983504 isoform CRA_e OS=Homo sapiens GN=TUBB3 PE=1 SV=1
tr|G3V3R4|G3V3R4_HUMAN	62.38	10	1	1	iTRAQ 4plex (K N-term)	16432	HCG1983504 isoform CRA_c OS=Homo sapiens GN=TUBB3 PE=1 SV=1
tr|G3V2N6|G3V2N6_HUMAN	62.38	9	1	1	iTRAQ 4plex (K N-term)	18288	HCG1983504 isoform CRA_d OS=Homo sapiens GN=TUBB3 PE=1 SV=1
sp|P25398|RS12_HUMAN	62.36	14	2	2	iTRAQ 4plex (K N-term)	14515	40S ribosomal protein S12 OS=Homo sapiens GN=RPS12 PE=1 SV=3
sp|O75531|BAF_HUMAN	62.28	13	1	1	iTRAQ 4plex (K N-term)	10059	Barrier-to-autointegration factor OS=Homo sapiens GN=BANF1 PE=1 SV=1
sp|P50914|RL14_HUMAN	62.04	6	1	1	iTRAQ 4plex (K N-term)	23432	60S ribosomal protein L14 OS=Homo sapiens GN=RPL14 PE=1 SV=4
tr|H0YIV0|H0YIV0_HUMAN	61.82	16	3	3	iTRAQ 4plex (K N-term)	17051	Endoplasmin (Fragment) OS=Homo sapiens GN=HSP90B1 PE=1 SV=1
tr|C9JZ20|C9JZ20_HUMAN	61.81	10	1	1	iTRAQ 4plex (K N-term)	22271	Prohibitin (Fragment) OS=Homo sapiens GN=PHB PE=1 SV=1
tr|E7ESE2|E7ESE2_HUMAN	61.81	10	1	1	iTRAQ 4plex (K N-term)	22399	Prohibitin (Fragment) OS=Homo sapiens GN=PHB PE=1 SV=2
tr|E9PCW0|E9PCW0_HUMAN	61.81	9	1	1	iTRAQ 4plex (K N-term)	23824	Prohibitin (Fragment) OS=Homo sapiens GN=PHB PE=1 SV=2
sp|P49588|SYAC_HUMAN	61.8	5	2	2	iTRAQ 4plex (K N-term)	106810	Alanine--tRNA ligase cytoplasmic OS=Homo sapiens GN=AARS PE=1 SV=2
tr|Q5T0I1|Q5T0I1_HUMAN	61.38	5	1	1	iTRAQ 4plex (K N-term)	25857	Gelsolin (Fragment) OS=Homo sapiens GN=GSN PE=1 SV=1
tr|A0A0U1RQL8|A0A0U1RQL8_HUMAN	61.38	5	1	1	iTRAQ 4plex (K N-term)	26301	Gelsolin (Fragment) OS=Homo sapiens GN=GSN PE=1 SV=1
tr|A0A0A0MS51|A0A0A0MS51_HUMAN	61.38	1	1	1	iTRAQ 4plex (K N-term)	82526	Gelsolin OS=Homo sapiens GN=GSN PE=1 SV=1
tr|A0A0A0MT01|A0A0A0MT01_HUMAN	61.38	1	1	1	iTRAQ 4plex (K N-term)	84745	Gelsolin OS=Homo sapiens GN=GSN PE=1 SV=1
sp|P06396|GELS_HUMAN	61.38	1	1	1	iTRAQ 4plex (K N-term)	85697	Gelsolin OS=Homo sapiens GN=GSN PE=1 SV=1
tr|Q5T0I0|Q5T0I0_HUMAN	61.38	4	1	1	iTRAQ 4plex (K N-term)	28954	Gelsolin (Fragment) OS=Homo sapiens GN=GSN PE=1 SV=1
tr|A0A087WX41|A0A087WX41_HUMAN	61.22	1	1	1	iTRAQ 4plex (K N-term)	142458	Clathrin heavy chain 2 OS=Homo sapiens GN=CLTCL1 PE=1 SV=1
sp|P53675|CLH2_HUMAN	61.22	1	1	1	iTRAQ 4plex (K N-term)	187029	Clathrin heavy chain 2 OS=Homo sapiens GN=CLTCL1 PE=1 SV=2
tr|J3QL05|J3QL05_HUMAN	61.15	12	2	2	iTRAQ 4plex (K N-term)	15156	Serine/arginine-rich-splicing factor 2 (Fragment) OS=Homo sapiens GN=SRSF2 PE=1 SV=1
tr|J3KP15|J3KP15_HUMAN	61.15	11	2	2	iTRAQ 4plex (K N-term)	15527	Serine/arginine-rich-splicing factor 2 (Fragment) OS=Homo sapiens GN=SRSF2 PE=1 SV=7
sp|Q01130|SRSF2_HUMAN	61.15	7	2	2	iTRAQ 4plex (K N-term)	25476	Serine/arginine-rich splicing factor 2 OS=Homo sapiens GN=SRSF2 PE=1 SV=4
sp|Q9BRL6|SRSF8_HUMAN	61.15	5	2	2	iTRAQ 4plex (K N-term)	32288	Serine/arginine-rich splicing factor 8 OS=Homo sapiens GN=SRSF8 PE=1 SV=1
tr|C9JV77|C9JV77_HUMAN	60.96	5	3	3	Carbamidomethylation; iTRAQ 4plex (K N-term)	39412	Alpha-2-HS-glycoprotein OS=Homo sapiens GN=AHSG PE=1 SV=1
tr|J3QR09|J3QR09_HUMAN	60.6	8	2	2	iTRAQ 4plex (K N-term)	23135	Ribosomal protein L19 OS=Homo sapiens GN=RPL19 PE=1 SV=1
tr|J3KTE4|J3KTE4_HUMAN	60.6	8	2	2	iTRAQ 4plex (K N-term)	23248	Ribosomal protein L19 OS=Homo sapiens GN=RPL19 PE=1 SV=1
sp|P84098|RL19_HUMAN	60.6	8	2	2	iTRAQ 4plex (K N-term)	23466	60S ribosomal protein L19 OS=Homo sapiens GN=RPL19 PE=1 SV=1
tr|G3XAC6|G3XAC6_HUMAN	60.4	5	1	1	iTRAQ 4plex (K N-term)	48024	RNA-binding protein 39 OS=Homo sapiens GN=RBM39 PE=1 SV=1
tr|D6RD47|D6RD47_HUMAN	60.12	14	2	2	iTRAQ 4plex (K N-term)	14837	40S ribosomal protein S23 OS=Homo sapiens GN=RPS23 PE=1 SV=1
sp|P62266|RS23_HUMAN	60.12	13	2	2	iTRAQ 4plex (K N-term)	15808	40S ribosomal protein S23 OS=Homo sapiens GN=RPS23 PE=1 SV=3
tr|F8W6P5|F8W6P5_HUMAN	60.08	11	1	1	iTRAQ 4plex (K N-term); iTRAQ 4plex (Y)	9670	Hemoglobin subunit beta (Fragment) OS=Homo sapiens GN=HBB PE=1 SV=1
sp|P61956|SUMO2_HUMAN	59.95	13	1	1	iTRAQ 4plex (K N-term)	10871	Small ubiquitin-related modifier 2 OS=Homo sapiens GN=SUMO2 PE=1 SV=3
sp|Q6EEV6|SUMO4_HUMAN	59.95	13	1	1	iTRAQ 4plex (K N-term)	10685	Small ubiquitin-related modifier 4 OS=Homo sapiens GN=SUMO4 PE=1 SV=2
sp|P55854|SUMO3_HUMAN	59.95	12	1	1	iTRAQ 4plex (K N-term)	11637	Small ubiquitin-related modifier 3 OS=Homo sapiens GN=SUMO3 PE=1 SV=2
tr|A8MUA9|A8MUA9_HUMAN	59.95	9	1	1	iTRAQ 4plex (K N-term)	15318	SMT3 suppressor of mif two 3 homolog 3 (Yeast) isoform CRA_d OS=Homo sapiens GN=SUMO3 PE=1 SV=1
tr|A8MU27|A8MU27_HUMAN	59.95	8	1	1	iTRAQ 4plex (K N-term)	16956	Small ubiquitin-related modifier 3 OS=Homo sapiens GN=SUMO3 PE=1 SV=1
tr|J3KSN7|J3KSN7_HUMAN	59.73	22	2	2	iTRAQ 4plex (K N-term)	12071	Eukaryotic initiation factor 4A-II (Fragment) OS=Homo sapiens GN=EIF4A2 PE=1 SV=1
tr|M0QX76|M0QX76_HUMAN	59.55	20	1	1	iTRAQ 4plex (K N-term)	5558	40S ribosomal protein S16 (Fragment) OS=Homo sapiens GN=RPS16 PE=1 SV=1
tr|F5H282|F5H282_HUMAN	59.4	11	2	2	iTRAQ 4plex (K N-term)	36456	T-complex protein 1 subunit alpha OS=Homo sapiens GN=TCP1 PE=1 SV=1
tr|E7EQR6|E7EQR6_HUMAN	59.4	9	2	2	iTRAQ 4plex (K N-term)	43886	T-complex protein 1 subunit alpha OS=Homo sapiens GN=TCP1 PE=1 SV=1
sp|Q15365|PCBP1_HUMAN	59.32	4	2	2	iTRAQ 4plex (K N-term)	37498	Poly(rC)-binding protein 1 OS=Homo sapiens GN=PCBP1 PE=1 SV=2
sp|Q92841|DDX17_HUMAN	59.14	2	1	1	iTRAQ 4plex (K N-term)	80273	Probable ATP-dependent RNA helicase DDX17 OS=Homo sapiens GN=DDX17 PE=1 SV=2
tr|H3BLZ8|H3BLZ8_HUMAN	59.14	2	1	1	iTRAQ 4plex (K N-term)	80440	Probable ATP-dependent RNA helicase DDX17 OS=Homo sapiens GN=DDX17 PE=1 SV=1
tr|A0A0U1RQJ0|A0A0U1RQJ0_HUMAN	59.14	21	1	1	iTRAQ 4plex (K N-term)	6096	Probable ATP-dependent RNA helicase DDX17 (Fragment) OS=Homo sapiens GN=DDX17 PE=1 SV=1
tr|E9PS50|E9PS50_HUMAN	58.88	15	2	2	iTRAQ 4plex (K N-term)	12460	40S ribosomal protein S13 (Fragment) OS=Homo sapiens GN=RPS13 PE=1 SV=1
tr|J3KMX5|J3KMX5_HUMAN	58.88	11	2	2	iTRAQ 4plex (K N-term)	16733	40S ribosomal protein S13 OS=Homo sapiens GN=RPS13 PE=1 SV=1
sp|P07305|H10_HUMAN	58.81	9	2	2	iTRAQ 4plex (K N-term)	20863	Histone H1.0 OS=Homo sapiens GN=H1F0 PE=1 SV=3
tr|A0A087WZM5|A0A087WZM5_HUMAN	58.8	10	1	1	iTRAQ 4plex (K N-term)	14927	Peptidyl-prolyl cis-trans isomerase OS=Homo sapiens GN=FKBP1A PE=1 SV=1
tr|Q1JUQ3|Q1JUQ3_HUMAN	58.8	35	1	1	iTRAQ 4plex (K N-term)	3965	FK506 binding protein12 OS=Homo sapiens GN=FKBP12-Exin PE=2 SV=1
tr|A0A087WTS4|A0A087WTS4_HUMAN	58.8	13	1	1	iTRAQ 4plex (K N-term)	10800	Peptidyl-prolyl cis-trans isomerase FKBP1A OS=Homo sapiens GN=FKBP1A PE=4 SV=1
tr|A0A087WV48|A0A087WV48_HUMAN	58.8	11	1	1	iTRAQ 4plex (K N-term)	12680	Uncharacterized protein OS=Homo sapiens PE=4 SV=1
tr|M0R042|M0R042_HUMAN	58.69	8	1	1	iTRAQ 4plex (K N-term)	15825	Tubulin beta-4A chain (Fragment) OS=Homo sapiens GN=TUBB4A PE=1 SV=1
tr|M0QYM7|M0QYM7_HUMAN	58.69	7	1	1	iTRAQ 4plex (K N-term)	17834	Tubulin beta-4A chain (Fragment) OS=Homo sapiens GN=TUBB4A PE=1 SV=7
tr|C9J4X2|C9J4X2_HUMAN	58.62	13	2	2	iTRAQ 4plex (K N-term)	14528	Non-POU domain-containing octamer-binding protein (Fragment) OS=Homo sapiens GN=NONO PE=1 SV=1
sp|P42166|LAP2A_HUMAN	58.39	2	1	1	iTRAQ 4plex (Y)	75492	Lamina-associated polypeptide 2 isoform alpha OS=Homo sapiens GN=TMPO PE=1 SV=2
tr|G5E972|G5E972_HUMAN	58.39	3	1	1	iTRAQ 4plex (Y)	46307	Lamina-associated polypeptide 2 isoforms beta/gamma OS=Homo sapiens GN=TMPO PE=1 SV=1
sp|P42167|LAP2B_HUMAN	58.39	3	1	1	iTRAQ 4plex (Y)	50670	Lamina-associated polypeptide 2 isoforms beta/gamma OS=Homo sapiens GN=TMPO PE=1 SV=2
tr|H0YJH7|H0YJH7_HUMAN	58.39	5	1	1	iTRAQ 4plex (Y)	26866	Lamina-associated polypeptide 2 isoforms beta/gamma (Fragment) OS=Homo sapiens GN=TMPO PE=1 SV=1
sp|Q9Y281|COF2_HUMAN	58.32	11	2	1	iTRAQ 4plex (K N-term); iTRAQ 4plex (Y)	18737	Cofilin-2 OS=Homo sapiens GN=CFL2 PE=1 SV=1
sp|P62195|PRS8_HUMAN	57.81	4	1	1	iTRAQ 4plex (K N-term)	45626	26S protease regulatory subunit 8 OS=Homo sapiens GN=PSMC5 PE=1 SV=1
sp|Q14566|MCM6_HUMAN	57.59	1	1	1	iTRAQ 4plex (K N-term)	92889	DNA replication licensing factor MCM6 OS=Homo sapiens GN=MCM6 PE=1 SV=1
tr|G3V575|G3V575_HUMAN	57.25	10	2	2	iTRAQ 4plex (K N-term)	20366	Heterogeneous nuclear ribonucleoproteins C1/C2 (Fragment) OS=Homo sapiens GN=HNRNPC PE=1 SV=1
tr|G3V555|G3V555_HUMAN	57.25	10	2	2	iTRAQ 4plex (K N-term)	19178	Heterogeneous nuclear ribonucleoproteins C1/C2 (Fragment) OS=Homo sapiens GN=HNRNPC PE=1 SV=1
sp|P62314|SMD1_HUMAN	56.89	17	1	1	iTRAQ 4plex (K N-term); iTRAQ 4plex (Y)	13282	Small nuclear ribonucleoprotein Sm D1 OS=Homo sapiens GN=SNRPD1 PE=1 SV=1
tr|J3QLI9|J3QLI9_HUMAN	56.89	27	1	1	iTRAQ 4plex (K N-term); iTRAQ 4plex (Y)	8393	Small nuclear ribonucleoprotein Sm D1 OS=Homo sapiens GN=SNRPD1 PE=1 SV=1
tr|H0YBP5|H0YBP5_HUMAN	56.69	24	1	1	iTRAQ 4plex (K N-term)	8547	Eukaryotic translation initiation factor 3 subunit E (Fragment) OS=Homo sapiens GN=EIF3E PE=1 SV=1
tr|E5RII3|E5RII3_HUMAN	56.69	24	1	1	iTRAQ 4plex (K N-term)	8886	Eukaryotic translation initiation factor 3 subunit E OS=Homo sapiens GN=EIF3E PE=1 SV=1
tr|H0YBR5|H0YBR5_HUMAN	56.69	11	1	1	iTRAQ 4plex (K N-term)	20265	Eukaryotic translation initiation factor 3 subunit E (Fragment) OS=Homo sapiens GN=EIF3E PE=1 SV=1
tr|C9JD32|C9JD32_HUMAN	56.44	18	2	2	iTRAQ 4plex (K N-term)	9670	60S ribosomal protein L23 (Fragment) OS=Homo sapiens GN=RPL23 PE=1 SV=1
tr|J3KT29|J3KT29_HUMAN	56.44	13	2	2	iTRAQ 4plex (K N-term)	13193	60S ribosomal protein L23 OS=Homo sapiens GN=RPL23 PE=1 SV=1
sp|P18077|RL35A_HUMAN	56.43	19	3	3	iTRAQ 4plex (K N-term)	12538	60S ribosomal protein L35a OS=Homo sapiens GN=RPL35A PE=1 SV=2
tr|A0A075B7A0|A0A075B7A0_HUMAN	56.4	12	2	1	iTRAQ 4plex (K N-term)	16198	60S ribosomal protein L18 OS=Homo sapiens GN=RPL18 PE=1 SV=1
tr|F8VYV2|F8VYV2_HUMAN	56.4	13	2	1	iTRAQ 4plex (K N-term)	15639	60S ribosomal protein L18 OS=Homo sapiens GN=RPL18 PE=1 SV=1
tr|A0A0C4DG33|A0A0C4DG33_HUMAN	56.37	1	1	1	iTRAQ 4plex (K N-term)	136585	Peroxisome biogenesis factor 1 OS=Homo sapiens GN=PEX1 PE=1 SV=1
sp|O43933|PEX1_HUMAN	56.37	1	1	1	iTRAQ 4plex (K N-term)	142867	Peroxisome biogenesis factor 1 OS=Homo sapiens GN=PEX1 PE=1 SV=1
tr|K7EIJ8|K7EIJ8_HUMAN	56.37	4	1	1	iTRAQ 4plex (K N-term)	38128	Katanin p60 ATPase-containing subunit A-like 2 (Fragment) OS=Homo sapiens GN=KATNAL2 PE=1 SV=1
sp|Q8IYT4|KATL2_HUMAN	56.37	2	1	1	iTRAQ 4plex (K N-term)	61253	Katanin p60 ATPase-containing subunit A-like 2 OS=Homo sapiens GN=KATNAL2 PE=2 SV=3
tr|K7EM02|K7EM02_HUMAN	56.37	9	1	1	iTRAQ 4plex (K N-term)	13999	Katanin p60 ATPase-containing subunit A-like 2 (Fragment) OS=Homo sapiens GN=KATNAL2 PE=1 SV=1
sp|O00148|DX39A_HUMAN	56.16	2	1	1	iTRAQ 4plex (K N-term)	49130	ATP-dependent RNA helicase DDX39A OS=Homo sapiens GN=DDX39A PE=1 SV=2
tr|I3L3P5|I3L3P5_HUMAN	55.78	10	1	1	iTRAQ 4plex (K N-term)	16876	Protein disulfide-isomerase (Fragment) OS=Homo sapiens GN=P4HB PE=1 SV=1
tr|Q5T8U5|Q5T8U5_HUMAN	55.71	10	1	1	iTRAQ 4plex (K N-term)	21128	Surfeit 4 OS=Homo sapiens GN=SURF4 PE=1 SV=1
sp|O15260|SURF4_HUMAN	55.71	7	1	1	iTRAQ 4plex (K N-term)	30394	Surfeit locus protein 4 OS=Homo sapiens GN=SURF4 PE=1 SV=3
tr|K7EJ44|K7EJ44_HUMAN	55.7	18	2	2	iTRAQ 4plex (K N-term)	11390	Profilin OS=Homo sapiens GN=PFN1 PE=1 SV=1
tr|F8W835|F8W835_HUMAN	55.68	5	1	1	iTRAQ 4plex (K N-term); iTRAQ 4plex (Y)	24519	Peripherin (Fragment) OS=Homo sapiens GN=PRPH PE=1 SV=2
sp|P83731|RL24_HUMAN	55.62	14	3	3	iTRAQ 4plex (K N-term)	17779	60S ribosomal protein L24 OS=Homo sapiens GN=RPL24 PE=1 SV=1
tr|Q5JRS0|Q5JRS0_HUMAN	55.52	5	2	2	iTRAQ 4plex (K N-term)	30764	Ubiquitin-like modifier-activating enzyme 1 (Fragment) OS=Homo sapiens GN=UBA1 PE=1 SV=1
sp|P55795|HNRH2_HUMAN	55.34	2	1	1	iTRAQ 4plex (K N-term)	49264	Heterogeneous nuclear ribonucleoprotein H2 OS=Homo sapiens GN=HNRNPH2 PE=1 SV=1
tr|E9PCY7|E9PCY7_HUMAN	55.34	2	1	1	iTRAQ 4plex (K N-term)	47087	Heterogeneous nuclear ribonucleoprotein H OS=Homo sapiens GN=HNRNPH1 PE=1 SV=1
sp|P31943|HNRH1_HUMAN	55.34	2	1	1	iTRAQ 4plex (K N-term)	49229	Heterogeneous nuclear ribonucleoprotein H OS=Homo sapiens GN=HNRNPH1 PE=1 SV=4
tr|G8JLB6|G8JLB6_HUMAN	55.34	2	1	1	iTRAQ 4plex (K N-term)	51230	Heterogeneous nuclear ribonucleoprotein H OS=Homo sapiens GN=HNRNPH1 PE=1 SV=1
tr|H0YBG7|H0YBG7_HUMAN	55.34	5	1	1	iTRAQ 4plex (K N-term)	19761	Heterogeneous nuclear ribonucleoprotein H (Fragment) OS=Homo sapiens GN=HNRNPH1 PE=1 SV=1
tr|H0YBD7|H0YBD7_HUMAN	55.34	5	1	1	iTRAQ 4plex (K N-term)	21306	Heterogeneous nuclear ribonucleoprotein H (Fragment) OS=Homo sapiens GN=HNRNPH1 PE=1 SV=7
tr|H0YB39|H0YB39_HUMAN	55.34	4	1	1	iTRAQ 4plex (K N-term)	30503	Heterogeneous nuclear ribonucleoprotein H (Fragment) OS=Homo sapiens GN=HNRNPH1 PE=1 SV=1
sp|O00264|PGRC1_HUMAN	54.72	8	2	2	Deamidation (NQ); iTRAQ 4plex (K N-term)	21671	Membrane-associated progesterone receptor component 1 OS=Homo sapiens GN=PGRMC1 PE=1 SV=3
tr|B7ZKJ8|B7ZKJ8_HUMAN	54.52	2	2	2	iTRAQ 4plex (K N-term)	103881	ITIH4 protein OS=Homo sapiens GN=ITIH4 PE=1 SV=1
sp|P05787|K2C8_HUMAN	54.47	3	2	1	iTRAQ 4plex (K N-term)	53704	Keratin type II cytoskeletal 8 OS=Homo sapiens GN=KRT8 PE=1 SV=7
sp|P08729|K2C7_HUMAN	54.47	3	2	1	iTRAQ 4plex (K N-term)	51386	Keratin type II cytoskeletal 7 OS=Homo sapiens GN=KRT7 PE=1 SV=5
sp|Q9NSB2|KRT84_HUMAN	54.47	2	2	1	iTRAQ 4plex (K N-term)	64842	Keratin type II cuticular Hb4 OS=Homo sapiens GN=KRT84 PE=2 SV=2
tr|J3KRZ1|J3KRZ1_HUMAN	54.35	7	1	1	iTRAQ 4plex (K N-term)	18906	Probable ATP-dependent RNA helicase DDX5 (Fragment) OS=Homo sapiens GN=DDX5 PE=1 SV=1
tr|J3QSF1|J3QSF1_HUMAN	54.35	7	1	1	iTRAQ 4plex (K N-term)	18069	Probable ATP-dependent RNA helicase DDX5 (Fragment) OS=Homo sapiens GN=DDX5 PE=1 SV=1
tr|A0A0C4DGI3|A0A0C4DGI3_HUMAN	54.27	3	1	1	iTRAQ 4plex (K N-term)	44703	Citrate synthase OS=Homo sapiens GN=CS PE=1 SV=1
sp|O75390|CISY_HUMAN	54.27	3	1	1	iTRAQ 4plex (K N-term)	51712	Citrate synthase mitochondrial OS=Homo sapiens GN=CS PE=1 SV=2
tr|B4DJV2|B4DJV2_HUMAN	54.27	3	1	1	iTRAQ 4plex (K N-term)	50432	Citrate synthase OS=Homo sapiens GN=CS PE=1 SV=1
tr|H0YIC4|H0YIC4_HUMAN	54.27	10	1	1	iTRAQ 4plex (K N-term)	14123	Citrate synthase (Fragment) OS=Homo sapiens GN=CS PE=1 SV=1
sp|O00410|IPO5_HUMAN	54.05	2	1	1	iTRAQ 4plex (K N-term)	123630	Importin-5 OS=Homo sapiens GN=IPO5 PE=1 SV=4
sp|Q5T2N8|ATD3C_HUMAN	53.92	3	1	1	iTRAQ 4plex (K N-term)	46380	ATPase family AAA domain-containing protein 3C OS=Homo sapiens GN=ATAD3C PE=2 SV=2
sp|P62857|RS28_HUMAN	53.75	13	1	1	iTRAQ 4plex (K N-term)	7841	40S ribosomal protein S28 OS=Homo sapiens GN=RPS28 PE=1 SV=1
tr|E7EPB3|E7EPB3_HUMAN	53.73	10	1	1	iTRAQ 4plex (K N-term)	14558	60S ribosomal protein L14 OS=Homo sapiens GN=RPL14 PE=1 SV=1
sp|P62244|RS15A_HUMAN	53.67	13	2	2	iTRAQ 4plex (K N-term)	14840	40S ribosomal protein S15a OS=Homo sapiens GN=RPS15A PE=1 SV=2
tr|I3L3P7|I3L3P7_HUMAN	53.67	17	2	2	iTRAQ 4plex (K N-term)	11478	40S ribosomal protein S15a OS=Homo sapiens GN=RPS15A PE=1 SV=1
tr|V9GZ37|V9GZ37_HUMAN	53.53	3	2	1	iTRAQ 4plex (K N-term)	51947	Heat shock 70 kDa protein 1A OS=Homo sapiens GN=HSPA1A PE=1 SV=1
tr|H0YES8|H0YES8_HUMAN	53.45	27	1	1	iTRAQ 4plex (K N-term)	3752	40S ribosomal protein S3 (Fragment) OS=Homo sapiens GN=RPS3 PE=1 SV=1
tr|E9PQX2|E9PQX2_HUMAN	53.45	20	1	1	iTRAQ 4plex (K N-term)	5012	40S ribosomal protein S3 OS=Homo sapiens GN=RPS3 PE=1 SV=1
tr|A0A087WW43|A0A087WW43_HUMAN	53.03	2	1	1	iTRAQ 4plex (K N-term)	75078	Inter-alpha-trypsin inhibitor heavy chain H3 OS=Homo sapiens GN=ITIH3 PE=1 SV=1
tr|E7ET33|E7ET33_HUMAN	53.03	2	1	1	iTRAQ 4plex (K N-term)	78130	Inter-alpha-trypsin inhibitor heavy chain H3 OS=Homo sapiens GN=ITIH3 PE=1 SV=1
sp|Q06033|ITIH3_HUMAN	53.03	1	1	1	iTRAQ 4plex (K N-term)	99849	Inter-alpha-trypsin inhibitor heavy chain H3 OS=Homo sapiens GN=ITIH3 PE=1 SV=2
sp|P50990|TCPQ_HUMAN	52.88	2	1	1	iTRAQ 4plex (K N-term)	59621	T-complex protein 1 subunit theta OS=Homo sapiens GN=CCT8 PE=1 SV=4
tr|E9PP36|E9PP36_HUMAN	52.87	5	1	1	iTRAQ 4plex (K N-term)	16180	60S ribosomal protein L8 OS=Homo sapiens GN=RPL8 PE=1 SV=1
sp|O15511|ARPC5_HUMAN	52.77	8	1	1	iTRAQ 4plex (K N-term)	16320	Actin-related protein 2/3 complex subunit 5 OS=Homo sapiens GN=ARPC5 PE=1 SV=3
tr|M0R0Y3|M0R0Y3_HUMAN	52.05	3	1	1	iTRAQ 4plex (K N-term)	38756	RuvB-like helicase OS=Homo sapiens GN=RUVBL2 PE=1 SV=1
sp|Q9Y230|RUVB2_HUMAN	52.05	3	1	1	iTRAQ 4plex (K N-term)	51157	RuvB-like 2 OS=Homo sapiens GN=RUVBL2 PE=1 SV=3
tr|X6R2L4|X6R2L4_HUMAN	52.05	5	1	1	iTRAQ 4plex (K N-term)	27930	RuvB-like helicase OS=Homo sapiens GN=RUVBL2 PE=1 SV=1
tr|M0QXI6|M0QXI6_HUMAN	52.05	11	1	1	iTRAQ 4plex (K N-term)	11425	RuvB-like helicase (Fragment) OS=Homo sapiens GN=RUVBL2 PE=1 SV=1
tr|A8MUF7|A8MUF7_HUMAN	51.9	11	1	1	iTRAQ 4plex (K N-term); iTRAQ 4plex (Y)	9470	Hemoglobin subunit epsilon (Fragment) OS=Homo sapiens GN=HBE1 PE=1 SV=1
sp|P02100|HBE_HUMAN	51.9	7	1	1	iTRAQ 4plex (K N-term); iTRAQ 4plex (Y)	16203	Hemoglobin subunit epsilon OS=Homo sapiens GN=HBE1 PE=1 SV=2
tr|E9PEW8|E9PEW8_HUMAN	51.9	10	1	1	iTRAQ 4plex (K N-term); iTRAQ 4plex (Y)	11346	Hemoglobin subunit delta (Fragment) OS=Homo sapiens GN=HBD PE=1 SV=1
tr|E9PBW4|E9PBW4_HUMAN	51.9	7	1	1	iTRAQ 4plex (K N-term); iTRAQ 4plex (Y)	15319	Hemoglobin subunit gamma-2 OS=Homo sapiens GN=HBG2 PE=1 SV=1
sp|P69892|HBG2_HUMAN	51.9	7	1	1	iTRAQ 4plex (K N-term); iTRAQ 4plex (Y)	16126	Hemoglobin subunit gamma-2 OS=Homo sapiens GN=HBG2 PE=1 SV=2
sp|P69891|HBG1_HUMAN	51.9	7	1	1	iTRAQ 4plex (K N-term); iTRAQ 4plex (Y)	16140	Hemoglobin subunit gamma-1 OS=Homo sapiens GN=HBG1 PE=1 SV=2
tr|A0A0D9SFB3|A0A0D9SFB3_HUMAN	51.69	2	1	1	iTRAQ 4plex (K N-term)	70840	ATP-dependent RNA helicase DDX3X OS=Homo sapiens GN=DDX3X PE=1 SV=1
tr|A0A0D9SG12|A0A0D9SG12_HUMAN	51.69	2	1	1	iTRAQ 4plex (K N-term)	71541	ATP-dependent RNA helicase DDX3X OS=Homo sapiens GN=DDX3X PE=1 SV=1
sp|O00571|DDX3X_HUMAN	51.69	2	1	1	iTRAQ 4plex (K N-term)	73244	ATP-dependent RNA helicase DDX3X OS=Homo sapiens GN=DDX3X PE=1 SV=3
tr|A0A0D9SF53|A0A0D9SF53_HUMAN	51.69	2	1	1	iTRAQ 4plex (K N-term)	81477	ATP-dependent RNA helicase DDX3X OS=Homo sapiens GN=DDX3X PE=1 SV=1
sp|O15523|DDX3Y_HUMAN	51.69	2	1	1	iTRAQ 4plex (K N-term)	73154	ATP-dependent RNA helicase DDX3Y OS=Homo sapiens GN=DDX3Y PE=1 SV=2
tr|B5MCT8|B5MCT8_HUMAN	51.35	16	3	3	iTRAQ 4plex (K N-term)	16628	40S ribosomal protein S9 OS=Homo sapiens GN=RPS9 PE=1 SV=1
tr|C9JM19|C9JM19_HUMAN	51.35	14	3	3	iTRAQ 4plex (K N-term)	18401	40S ribosomal protein S9 OS=Homo sapiens GN=RPS9 PE=1 SV=1
tr|A0A024R4M0|A0A024R4M0_HUMAN	51.35	11	3	3	iTRAQ 4plex (K N-term)	22591	40S ribosomal protein S9 OS=Homo sapiens GN=RPS9 PE=1 SV=1
sp|P46781|RS9_HUMAN	51.35	11	3	3	iTRAQ 4plex (K N-term)	22591	40S ribosomal protein S9 OS=Homo sapiens GN=RPS9 PE=1 SV=3
tr|G3V5V7|G3V5V7_HUMAN	51.2	8	2	2	iTRAQ 4plex (K N-term)	20254	Heterogeneous nuclear ribonucleoproteins C1/C2 (Fragment) OS=Homo sapiens GN=HNRNPC PE=1 SV=1
tr|G3V2D6|G3V2D6_HUMAN	51.2	7	2	2	iTRAQ 4plex (K N-term)	23808	Heterogeneous nuclear ribonucleoproteins C1/C2 (Fragment) OS=Homo sapiens GN=HNRNPC PE=1 SV=1
tr|E9PQB7|E9PQB7_HUMAN	51.14	15	2	1	iTRAQ 4plex (K N-term); iTRAQ 4plex (Y)	13923	Cofilin-1 (Fragment) OS=Homo sapiens GN=CFL1 PE=1 SV=1
tr|C9JNW5|C9JNW5_HUMAN	51.13	15	3	3	iTRAQ 4plex (K N-term)	17543	60S ribosomal protein L24 OS=Homo sapiens GN=RPL24 PE=1 SV=1
tr|H7C540|H7C540_HUMAN	50.87	9	1	1	iTRAQ 4plex (K N-term)	18928	Ribose-phosphate pyrophosphokinase 2 (Fragment) OS=Homo sapiens GN=PRPS2 PE=1 SV=1
sp|P11908|PRPS2_HUMAN	50.87	5	1	1	iTRAQ 4plex (K N-term)	34769	Ribose-phosphate pyrophosphokinase 2 OS=Homo sapiens GN=PRPS2 PE=1 SV=2
sp|P60891|PRPS1_HUMAN	50.87	5	1	1	iTRAQ 4plex (K N-term)	34834	Ribose-phosphate pyrophosphokinase 1 OS=Homo sapiens GN=PRPS1 PE=1 SV=2
tr|B7ZB78|B7ZB78_HUMAN	50.67	10	1	1	iTRAQ 4plex (K N-term)	13510	Ras-related protein Rap-1b OS=Homo sapiens GN=RAP1B PE=1 SV=1
tr|A0A0J9YXB3|A0A0J9YXB3_HUMAN	50.67	7	1	1	iTRAQ 4plex (K N-term)	18851	Uncharacterized protein OS=Homo sapiens PE=4 SV=1
sp|A6NIZ1|RP1BL_HUMAN	50.67	7	1	1	iTRAQ 4plex (K N-term)	20925	Ras-related protein Rap-1b-like protein OS=Homo sapiens PE=2 SV=1
sp|P61224|RAP1B_HUMAN	50.67	7	1	1	iTRAQ 4plex (K N-term)	20825	Ras-related protein Rap-1b OS=Homo sapiens GN=RAP1B PE=1 SV=1
tr|F5H823|F5H823_HUMAN	50.67	12	1	1	iTRAQ 4plex (K N-term)	11917	Ras-related protein Rap-1b (Fragment) OS=Homo sapiens GN=RAP1B PE=1 SV=1
tr|F5GZG1|F5GZG1_HUMAN	50.67	10	1	1	iTRAQ 4plex (K N-term)	13889	Ras-related protein Rap-1b (Fragment) OS=Homo sapiens GN=RAP1B PE=1 SV=7
sp|P62834|RAP1A_HUMAN	50.67	7	1	1	iTRAQ 4plex (K N-term)	20987	Ras-related protein Rap-1A OS=Homo sapiens GN=RAP1A PE=1 SV=1
tr|D6R9B6|D6R9B6_HUMAN	50.2	6	1	1	iTRAQ 4plex (K N-term)	16536	40S ribosomal protein S3a OS=Homo sapiens GN=RPS3A PE=1 SV=1
sp|P04264|K2C1_HUMAN	50.11	2	2	1	iTRAQ 4plex (K N-term)	66039	Keratin type II cytoskeletal 1 OS=Homo sapiens GN=KRT1 PE=1 SV=6
tr|Q5JQ13|Q5JQ13_HUMAN	49.64	1	1	1	iTRAQ 4plex (K N-term)	87444	Vinculin (Fragment) OS=Homo sapiens GN=VCL PE=1 SV=1
tr|J3QT27|J3QT27_HUMAN	49.21	4	2	2	iTRAQ 4plex (K N-term)	34386	Poly(rC)-binding protein 3 (Fragment) OS=Homo sapiens GN=PCBP3 PE=1 SV=1
tr|E9PFP8|E9PFP8_HUMAN	49.21	4	2	2	iTRAQ 4plex (K N-term)	38187	Poly(rC)-binding protein 3 OS=Homo sapiens GN=PCBP3 PE=1 SV=1
sp|P57721|PCBP3_HUMAN	49.21	4	2	2	iTRAQ 4plex (K N-term)	39465	Poly(rC)-binding protein 3 OS=Homo sapiens GN=PCBP3 PE=2 SV=2
tr|M0QZU1|M0QZU1_HUMAN	48.81	52	3	2	iTRAQ 4plex (K N-term)	4718	60S ribosomal protein L13a OS=Homo sapiens GN=RPL13A PE=1 SV=1
tr|A0A096LPE0|A0A096LPE0_HUMAN	48.81	50	3	2	iTRAQ 4plex (K N-term)	5173	60S ribosomal protein L13a OS=Homo sapiens GN=RPL13A PE=1 SV=1
tr|I3L0S0|I3L0S0_HUMAN	48.65	11	2	2	iTRAQ 4plex (K N-term)	16215	Protein disulfide-isomerase (Fragment) OS=Homo sapiens GN=P4HB PE=1 SV=1
tr|M0QXK4|M0QXK4_HUMAN	48.59	9	1	1	iTRAQ 4plex (K N-term)	8480	40S ribosomal protein S19 (Fragment) OS=Homo sapiens GN=RPS19 PE=1 SV=1
tr|M0R140|M0R140_HUMAN	48.59	7	1	1	iTRAQ 4plex (K N-term)	11051	40S ribosomal protein S19 (Fragment) OS=Homo sapiens GN=RPS19 PE=1 SV=1
tr|H0Y400|H0Y400_HUMAN	48.57	5	1	1	iTRAQ 4plex (K N-term)	21798	Spliceosome RNA helicase DDX39B (Fragment) OS=Homo sapiens GN=DDX39B PE=1 SV=1
tr|A0A0G2JJZ9|A0A0G2JJZ9_HUMAN	48.57	3	1	1	iTRAQ 4plex (K N-term)	38244	Spliceosome RNA helicase DDX39B (Fragment) OS=Homo sapiens GN=DDX39B PE=1 SV=1
sp|Q13838|DX39B_HUMAN	48.57	2	1	1	iTRAQ 4plex (K N-term)	48991	Spliceosome RNA helicase DDX39B OS=Homo sapiens GN=DDX39B PE=1 SV=1
tr|A0A140T9X3|A0A140T9X3_HUMAN	48.57	3	1	1	iTRAQ 4plex (K N-term)	38079	Spliceosome RNA helicase DDX39B (Fragment) OS=Homo sapiens GN=DDX39B PE=1 SV=1
tr|Q5STU3|Q5STU3_HUMAN	48.57	2	1	1	iTRAQ 4plex (K N-term)	48826	Spliceosome RNA helicase DDX39B OS=Homo sapiens GN=DDX39B PE=1 SV=2
sp|Q15717|ELAV1_HUMAN	48.47	3	1	1	iTRAQ 4plex (K N-term)	36092	ELAV-like protein 1 OS=Homo sapiens GN=ELAVL1 PE=1 SV=2
tr|H0YKV8|H0YKV8_HUMAN	48.45	11	1	1	iTRAQ 4plex (K N-term)	9042	Annexin A2 (Fragment) OS=Homo sapiens GN=ANXA2 PE=1 SV=1
tr|K7ES69|K7ES69_HUMAN	48.19	7	1	1	iTRAQ 4plex (K N-term)	16498	Calponin-2 OS=Homo sapiens GN=CNN2 PE=1 SV=1
sp|Q99439|CNN2_HUMAN	48.19	4	1	1	iTRAQ 4plex (K N-term)	33697	Calponin-2 OS=Homo sapiens GN=CNN2 PE=1 SV=4
tr|C9JSZ1|C9JSZ1_HUMAN	48.15	9	2	1	iTRAQ 4plex (K N-term)	24044	Far upstream element-binding protein 1 (Fragment) OS=Homo sapiens GN=FUBP1 PE=1 SV=1
sp|Q96AE4|FUBP1_HUMAN	48.15	3	2	1	iTRAQ 4plex (K N-term)	67560	Far upstream element-binding protein 1 OS=Homo sapiens GN=FUBP1 PE=1 SV=3
tr|E9PEB5|E9PEB5_HUMAN	48.15	3	2	1	iTRAQ 4plex (K N-term)	68904	Far upstream element-binding protein 1 OS=Homo sapiens GN=FUBP1 PE=1 SV=1
tr|H0YH80|H0YH80_HUMAN	48	9	2	1	iTRAQ 4plex (K N-term)	19472	Heterogeneous nuclear ribonucleoprotein A1 (Fragment) OS=Homo sapiens GN=HNRNPA1 PE=1 SV=1
sp|P49207|RL34_HUMAN	47.89	13	2	2	iTRAQ 4plex (K N-term)	13293	60S ribosomal protein L34 OS=Homo sapiens GN=RPL34 PE=1 SV=3
sp|Q02878|RL6_HUMAN	47.83	5	2	1	iTRAQ 4plex (K N-term)	32728	60S ribosomal protein L6 OS=Homo sapiens GN=RPL6 PE=1 SV=3
tr|F8VPP1|F8VPP1_HUMAN	47.63	26	1	1	iTRAQ 4plex (K N-term)	4460	Adenylate kinase 2 mitochondrial OS=Homo sapiens GN=AK2 PE=1 SV=1
tr|G3V213|G3V213_HUMAN	47.63	8	1	1	iTRAQ 4plex (K N-term)	14325	Adenylate kinase 2 isoform CRA_a OS=Homo sapiens GN=AK2 PE=1 SV=1
tr|F8VZG5|F8VZG5_HUMAN	47.63	7	1	1	iTRAQ 4plex (K N-term)	17499	Adenylate kinase 2 mitochondrial OS=Homo sapiens GN=AK2 PE=1 SV=1
tr|F8VY04|F8VY04_HUMAN	47.63	6	1	1	iTRAQ 4plex (K N-term)	21226	Adenylate kinase 2 mitochondrial OS=Homo sapiens GN=AK2 PE=1 SV=1
tr|F8W1A4|F8W1A4_HUMAN	47.63	5	1	1	iTRAQ 4plex (K N-term)	25631	Adenylate kinase 2 mitochondrial OS=Homo sapiens GN=AK2 PE=1 SV=1
sp|P54819|KAD2_HUMAN	47.63	5	1	1	iTRAQ 4plex (K N-term)	26478	Adenylate kinase 2 mitochondrial OS=Homo sapiens GN=AK2 PE=1 SV=2
tr|A0A0G2JNQ3|A0A0G2JNQ3_HUMAN	46.95	5	2	2	iTRAQ 4plex (K N-term)	32053	Heterogeneous nuclear ribonucleoprotein C-like 2 OS=Homo sapiens GN=HNRNPCL2 PE=4 SV=1
sp|P0DMR1|HNRC4_HUMAN	46.95	5	2	2	iTRAQ 4plex (K N-term)	32029	Heterogeneous nuclear ribonucleoprotein C-like 4 OS=Homo sapiens GN=HNRNPCL4 PE=3 SV=1
tr|A0A0G2JPF8|A0A0G2JPF8_HUMAN	46.95	5	2	2	iTRAQ 4plex (K N-term)	32057	Heterogeneous nuclear ribonucleoprotein C-like 4 OS=Homo sapiens GN=HNRNPCL4 PE=4 SV=1
sp|O60812|HNRC1_HUMAN	46.95	5	2	2	iTRAQ 4plex (K N-term)	32142	Heterogeneous nuclear ribonucleoprotein C-like 1 OS=Homo sapiens GN=HNRNPCL1 PE=2 SV=1
sp|B7ZW38|HNRC3_HUMAN	46.95	5	2	2	iTRAQ 4plex (K N-term)	32029	Heterogeneous nuclear ribonucleoprotein C-like 3 OS=Homo sapiens GN=HNRNPCL3 PE=2 SV=1
sp|B2RXH8|HNRC2_HUMAN	46.95	5	2	2	iTRAQ 4plex (K N-term)	32072	Heterogeneous nuclear ribonucleoprotein C-like 2 OS=Homo sapiens GN=HNRNPCL2 PE=2 SV=1
sp|P27635|RL10_HUMAN	46.85	4	1	1	iTRAQ 4plex (K N-term)	24604	60S ribosomal protein L10 OS=Homo sapiens GN=RPL10 PE=1 SV=4
tr|D6RHJ5|D6RHJ5_HUMAN	46.8	10	1	1	iTRAQ 4plex (K N-term)	9500	Receptor of-activated protein C kinase 1 OS=Homo sapiens GN=RACK1 PE=1 SV=1
tr|D6RF23|D6RF23_HUMAN	46.8	9	1	1	iTRAQ 4plex (K N-term)	11247	Receptor of-activated protein C kinase 1 OS=Homo sapiens GN=RACK1 PE=1 SV=1
tr|H0Y8R5|H0Y8R5_HUMAN	46.8	7	1	1	iTRAQ 4plex (K N-term)	15209	Receptor of-activated protein C kinase 1 (Fragment) OS=Homo sapiens GN=RACK1 PE=1 SV=1
tr|D6RAC2|D6RAC2_HUMAN	46.8	3	1	1	iTRAQ 4plex (K N-term)	29751	Receptor of-activated protein C kinase 1 OS=Homo sapiens GN=RACK1 PE=1 SV=1
sp|P09429|HMGB1_HUMAN	46.37	7	2	2	iTRAQ 4plex (K N-term)	24894	High mobility group protein B1 OS=Homo sapiens GN=HMGB1 PE=1 SV=3
sp|Q15056|IF4H_HUMAN	46.3	12	1	1	iTRAQ 4plex (K N-term)	27385	Eukaryotic translation initiation factor 4H OS=Homo sapiens GN=EIF4H PE=1 SV=5
sp|Q9UQ80|PA2G4_HUMAN	46.14	5	2	2	iTRAQ 4plex (K N-term)	43787	Proliferation-associated protein 2G4 OS=Homo sapiens GN=PA2G4 PE=1 SV=3
tr|H7C2U0|H7C2U0_HUMAN	45.12	10	1	1	iTRAQ 4plex (K N-term)	11537	T-complex protein 1 subunit theta (Fragment) OS=Homo sapiens GN=CCT8 PE=1 SV=1
tr|B8ZZ54|B8ZZ54_HUMAN	45.04	21	1	1	iTRAQ 4plex (K N-term)	5190	10 kDa heat shock protein mitochondrial OS=Homo sapiens GN=HSPE1 PE=1 SV=1
tr|H3BR68|H3BR68_HUMAN	44.47	6	1	1	iTRAQ 4plex (K N-term)	13786	Fructose-bisphosphate aldolase A (Fragment) OS=Homo sapiens GN=ALDOA PE=1 SV=1
tr|J3QRQ7|J3QRQ7_HUMAN	44.37	9	1	1	iTRAQ 4plex (K N-term)	23488	Probable ATP-dependent RNA helicase DDX5 (Fragment) OS=Homo sapiens GN=DDX5 PE=1 SV=1
sp|P60174|TPIS_HUMAN	43.76	13	2	2	iTRAQ 4plex (K N-term)	30791	Triosephosphate isomerase OS=Homo sapiens GN=TPI1 PE=1 SV=3
sp|Q5JNZ5|RS26L_HUMAN	43.55	8	1	1	iTRAQ 4plex (K N-term)	13002	Putative 40S ribosomal protein S26-like 1 OS=Homo sapiens GN=RPS26P11 PE=5 SV=1
tr|C9JXB8|C9JXB8_HUMAN	43.48	12	2	2	iTRAQ 4plex (K N-term)	14369	60S ribosomal protein L24 OS=Homo sapiens GN=RPL24 PE=1 SV=1
tr|E9PFF2|E9PFF2_HUMAN	43.41	5	1	1	Deamidation (NQ); iTRAQ 4plex (K N-term)	36449	Transketolase OS=Homo sapiens GN=TKT PE=1 SV=1
tr|M0R0F0|M0R0F0_HUMAN	43.25	4	1	1	iTRAQ 4plex (K N-term)	22391	40S ribosomal protein S5 (Fragment) OS=Homo sapiens GN=RPS5 PE=1 SV=1
sp|P46782|RS5_HUMAN	43.25	4	1	1	iTRAQ 4plex (K N-term)	22876	40S ribosomal protein S5 OS=Homo sapiens GN=RPS5 PE=1 SV=4
tr|M0R0R2|M0R0R2_HUMAN	43.25	4	1	1	iTRAQ 4plex (K N-term)	25333	40S ribosomal protein S5 OS=Homo sapiens GN=RPS5 PE=1 SV=1
tr|E9PP73|E9PP73_HUMAN	42.83	2	1	1	iTRAQ 4plex (K N-term)	55538	Coatomer subunit beta (Fragment) OS=Homo sapiens GN=COPB1 PE=1 SV=7
sp|P53618|COPB_HUMAN	42.83	1	1	1	iTRAQ 4plex (K N-term)	107142	Coatomer subunit beta OS=Homo sapiens GN=COPB1 PE=1 SV=3
tr|A8MYQ9|A8MYQ9_HUMAN	42.31	4	1	1	iTRAQ 4plex (K N-term)	29201	Ras-related protein Rab-34 isoform NARR OS=Homo sapiens GN=RAB34 PE=1 SV=2
tr|C9JY26|C9JY26_HUMAN	42.31	4	1	1	iTRAQ 4plex (K N-term)	28915	Ras-related protein Rab-34 isoform NARR (Fragment) OS=Homo sapiens GN=RAB34 PE=1 SV=8
tr|A0A087WXI0|A0A087WXI0_HUMAN	42.31	1	1	1	iTRAQ 4plex (K N-term)	110850	Ras-related protein Rab-44 OS=Homo sapiens GN=RAB44 PE=1 SV=1
tr|E7ES60|E7ES60_HUMAN	42.31	4	1	1	iTRAQ 4plex (K N-term)	29898	Ras-related protein Rab-34 isoform NARR OS=Homo sapiens GN=RAB34 PE=1 SV=2
sp|Q9H082|RB33B_HUMAN	42.31	5	1	1	iTRAQ 4plex (K N-term)	25717	Ras-related protein Rab-33B OS=Homo sapiens GN=RAB33B PE=1 SV=1
tr|H0YMN7|H0YMN7_HUMAN	42.31	12	1	1	iTRAQ 4plex (K N-term)	10484	Ras-related protein Rab-8B OS=Homo sapiens GN=RAB8B PE=1 SV=1
tr|H0YNE9|H0YNE9_HUMAN	42.31	6	1	1	iTRAQ 4plex (K N-term)	21868	Ras-related protein Rab-8B (Fragment) OS=Homo sapiens GN=RAB8B PE=1 SV=1
tr|J3QLC6|J3QLC6_HUMAN	42.31	7	1	1	iTRAQ 4plex (K N-term)	17491	Ras-related protein Rab-34 isoform NARR (Fragment) OS=Homo sapiens GN=RAB34 PE=1 SV=1
tr|K7ES41|K7ES41_HUMAN	42.31	13	1	1	iTRAQ 4plex (K N-term)	9816	Ras-related protein Rab-27B (Fragment) OS=Homo sapiens GN=RAB27B PE=1 SV=1
tr|J3QSF4|J3QSF4_HUMAN	42.31	8	1	1	iTRAQ 4plex (K N-term)	15643	Ras-related protein Rab-15 (Fragment) OS=Homo sapiens GN=RAB15 PE=1 SV=1
tr|G3V562|G3V562_HUMAN	42.31	7	1	1	iTRAQ 4plex (K N-term)	17556	Ras-related protein Rab-15 (Fragment) OS=Homo sapiens GN=RAB15 PE=1 SV=1
tr|G3V196|G3V196_HUMAN	42.31	7	1	1	iTRAQ 4plex (K N-term)	19232	Ras-related protein Rab-15 OS=Homo sapiens GN=RAB15 PE=1 SV=1
tr|A8MZI4|A8MZI4_HUMAN	42.31	6	1	1	iTRAQ 4plex (K N-term)	21742	Ras-related protein Rab-37 OS=Homo sapiens GN=RAB37 PE=1 SV=1
tr|K7EIF2|K7EIF2_HUMAN	42.31	7	1	1	iTRAQ 4plex (K N-term)	16916	Ras-related protein Rab-34 isoform NARR (Fragment) OS=Homo sapiens GN=RAB34 PE=1 SV=1
tr|H7C0Y7|H7C0Y7_HUMAN	42.31	6	1	1	iTRAQ 4plex (K N-term)	19081	Ras-related protein Rab-34 isoform NARR OS=Homo sapiens GN=RAB34 PE=1 SV=2
tr|C9JB90|C9JB90_HUMAN	42.31	22	1	1	iTRAQ 4plex (K N-term)	5858	Ras-related protein Rab-6B (Fragment) OS=Homo sapiens GN=RAB6B PE=4 SV=1
tr|C9JU14|C9JU14_HUMAN	42.31	13	1	1	iTRAQ 4plex (K N-term)	9667	Ras-related protein Rab-6B (Fragment) OS=Homo sapiens GN=RAB6B PE=1 SV=3
tr|E9PLM3|E9PLM3_HUMAN	42.31	12	1	1	iTRAQ 4plex (K N-term)	10954	Ras-related protein Rab-30 OS=Homo sapiens GN=RAB30 PE=1 SV=1
tr|H3BUD9|H3BUD9_HUMAN	42.31	12	1	1	iTRAQ 4plex (K N-term)	10688	Ras-related protein Rab-27A (Fragment) OS=Homo sapiens GN=RAB27A PE=1 SV=1
tr|E9PJQ5|E9PJQ5_HUMAN	42.31	11	1	1	iTRAQ 4plex (K N-term)	11327	Ras-related protein Rab-30 (Fragment) OS=Homo sapiens GN=RAB30 PE=1 SV=1
tr|E9PRF7|E9PRF7_HUMAN	42.31	10	1	1	iTRAQ 4plex (K N-term)	13072	Ras-related protein Rab-30 (Fragment) OS=Homo sapiens GN=RAB30 PE=1 SV=1
tr|E9PNB9|E9PNB9_HUMAN	42.31	9	1	1	iTRAQ 4plex (K N-term)	13882	Ras-related protein Rab-30 OS=Homo sapiens GN=RAB30 PE=1 SV=1
tr|J3KR73|J3KR73_HUMAN	42.31	9	1	1	iTRAQ 4plex (K N-term)	14329	Ras-related protein Rab-6B (Fragment) OS=Homo sapiens GN=RAB6B PE=1 SV=1
tr|H3BS49|H3BS49_HUMAN	42.31	8	1	1	iTRAQ 4plex (K N-term)	15453	Ras-related protein Rab-27A (Fragment) OS=Homo sapiens GN=RAB27A PE=1 SV=1
tr|H3BVH7|H3BVH7_HUMAN	42.31	8	1	1	iTRAQ 4plex (K N-term)	16680	Ras-related protein Rab-27A (Fragment) OS=Homo sapiens GN=RAB27A PE=1 SV=1
tr|H0YDK7|H0YDK7_HUMAN	42.31	7	1	1	iTRAQ 4plex (K N-term)	19249	Ras-related protein Rab-30 (Fragment) OS=Homo sapiens GN=RAB30 PE=1 SV=1
tr|E9PMJ1|E9PMJ1_HUMAN	42.31	7	1	1	iTRAQ 4plex (K N-term)	19250	Ras-related protein Rab-30 (Fragment) OS=Homo sapiens GN=RAB30 PE=1 SV=1
tr|X6RFL8|X6RFL8_HUMAN	42.31	6	1	1	iTRAQ 4plex (K N-term)	20409	Ras-related protein Rab-14 (Fragment) OS=Homo sapiens GN=RAB14 PE=1 SV=1
tr|H3BN55|H3BN55_HUMAN	42.31	6	1	1	iTRAQ 4plex (K N-term)	20980	Ras-related protein Rab-27A (Fragment) OS=Homo sapiens GN=RAB27A PE=1 SV=1
tr|F5H157|F5H157_HUMAN	42.31	6	1	1	iTRAQ 4plex (K N-term)	21214	Ras-related protein Rab-35 (Fragment) OS=Homo sapiens GN=RAB35 PE=1 SV=1
tr|M0R0X1|M0R0X1_HUMAN	42.31	6	1	1	iTRAQ 4plex (K N-term)	21329	Ras-related protein Rab-4B (Fragment) OS=Homo sapiens GN=RAB4B PE=1 SV=1
sp|P61106|RAB14_HUMAN	42.31	5	1	1	iTRAQ 4plex (K N-term)	23897	Ras-related protein Rab-14 OS=Homo sapiens GN=RAB14 PE=1 SV=4
tr|M0R2L9|M0R2L9_HUMAN	42.12	10	1	1	iTRAQ 4plex (K N-term)	8189	40S ribosomal protein S19 (Fragment) OS=Homo sapiens GN=RPS19 PE=1 SV=1
tr|M0QYF7|M0QYF7_HUMAN	42.12	7	1	1	iTRAQ 4plex (K N-term)	11605	40S ribosomal protein S19 (Fragment) OS=Homo sapiens GN=RPS19 PE=1 SV=1
tr|Q5SZX6|Q5SZX6_HUMAN	41.89	6	2	2	iTRAQ 4plex (K N-term)	30761	T-complex protein 1 subunit gamma (Fragment) OS=Homo sapiens GN=CCT3 PE=1 SV=1
sp|P49368|TCPG_HUMAN	41.89	3	2	2	iTRAQ 4plex (K N-term)	60534	T-complex protein 1 subunit gamma OS=Homo sapiens GN=CCT3 PE=1 SV=4
sp|Q13200|PSMD2_HUMAN	41.86	2	1	1	iTRAQ 4plex (K N-term)	100200	26S proteasome non-ATPase regulatory subunit 2 OS=Homo sapiens GN=PSMD2 PE=1 SV=3
tr|H7C1H2|H7C1H2_HUMAN	41.86	7	1	1	iTRAQ 4plex (K N-term)	22450	26S proteasome non-ATPase regulatory subunit 2 (Fragment) OS=Homo sapiens GN=PSMD2 PE=1 SV=1
sp|Q03252|LMNB2_HUMAN	41.83	1	1	1	iTRAQ 4plex (K N-term)	69948	Lamin-B2 OS=Homo sapiens GN=LMNB2 PE=1 SV=4
tr|J9JID7|J9JID7_HUMAN	41.83	1	1	1	iTRAQ 4plex (K N-term)	69948	Lamin B2 isoform CRA_a OS=Homo sapiens GN=LMNB2 PE=1 SV=1
tr|E5RJH3|E5RJH3_HUMAN	41.36	14	1	1	iTRAQ 4plex (K N-term)	6263	60S ribosomal protein L30 OS=Homo sapiens GN=RPL30 PE=1 SV=1
tr|A0A0C4DH44|A0A0C4DH44_HUMAN	41.36	8	1	1	iTRAQ 4plex (K N-term)	10505	60S ribosomal protein L30 OS=Homo sapiens GN=RPL30 PE=1 SV=1
tr|E5RI99|E5RI99_HUMAN	41.36	7	1	1	iTRAQ 4plex (K N-term)	12656	60S ribosomal protein L30 (Fragment) OS=Homo sapiens GN=RPL30 PE=1 SV=1
sp|P62888|RL30_HUMAN	41.36	7	1	1	iTRAQ 4plex (K N-term)	12784	60S ribosomal protein L30 OS=Homo sapiens GN=RPL30 PE=1 SV=2
tr|K7ERY7|K7ERY7_HUMAN	41.35	20	1	1	iTRAQ 4plex (K N-term)	4366	60S ribosomal protein L27 OS=Homo sapiens GN=RPL27 PE=1 SV=1
tr|R4GN99|R4GN99_HUMAN	41.07	4	1	1	iTRAQ 4plex (K N-term)	15350	Peptidyl-prolyl cis-trans isomerase OS=Homo sapiens GN=PPIF PE=1 SV=1
tr|H0Y548|H0Y548_HUMAN	41.07	4	1	1	iTRAQ 4plex (K N-term)	17553	Peptidyl-prolyl cis-trans isomerase (Fragment) OS=Homo sapiens GN=PPIF PE=1 SV=1
sp|P30405|PPIF_HUMAN	41.07	3	1	1	iTRAQ 4plex (K N-term)	22040	Peptidyl-prolyl cis-trans isomerase F mitochondrial OS=Homo sapiens GN=PPIF PE=1 SV=1
tr|D6RIX0|D6RIX0_HUMAN	41.04	9	1	1	iTRAQ 4plex (K N-term)	9610	40S ribosomal protein S23 OS=Homo sapiens GN=RPS23 PE=1 SV=1
tr|D6R9I7|D6R9I7_HUMAN	41.04	7	1	1	iTRAQ 4plex (K N-term)	13807	40S ribosomal protein S23 OS=Homo sapiens GN=RPS23 PE=1 SV=1
tr|D6RDJ2|D6RDJ2_HUMAN	41.04	15	1	1	iTRAQ 4plex (K N-term)	6237	40S ribosomal protein S23 OS=Homo sapiens GN=RPS23 PE=1 SV=1
tr|X1WI28|X1WI28_HUMAN	40.98	4	1	1	iTRAQ 4plex (K N-term)	23072	60S ribosomal protein L10 (Fragment) OS=Homo sapiens GN=RPL10 PE=1 SV=6
sp|Q96L21|RL10L_HUMAN	40.98	4	1	1	iTRAQ 4plex (K N-term)	24519	60S ribosomal protein L10-like OS=Homo sapiens GN=RPL10L PE=1 SV=3
sp|Q8IVF2|AHNK2_HUMAN	39.84	0	1	1	iTRAQ 4plex (K N-term)	616641	Protein AHNAK2 OS=Homo sapiens GN=AHNAK2 PE=1 SV=2
tr|Q5JRS3|Q5JRS3_HUMAN	39.76	4	1	1	iTRAQ 4plex (K N-term)	20746	Ubiquitin-like modifier-activating enzyme 1 (Fragment) OS=Homo sapiens GN=UBA1 PE=1 SV=1
tr|H0YIZ0|H0YIZ0_HUMAN	39.21	6	1	1	Deamidation (NQ); iTRAQ 4plex (K N-term)	28826	Serine hydroxymethyltransferase (Fragment) OS=Homo sapiens GN=SHMT2 PE=1 SV=1
sp|P34897|GLYM_HUMAN	39.21	3	1	1	Deamidation (NQ); iTRAQ 4plex (K N-term)	55993	Serine hydroxymethyltransferase mitochondrial OS=Homo sapiens GN=SHMT2 PE=1 SV=3
tr|B4DXW1|B4DXW1_HUMAN	39.15	3	1	1	iTRAQ 4plex (K N-term)	42004	Actin-related protein 3 OS=Homo sapiens GN=ACTR3 PE=1 SV=1
sp|Q9C0K3|ARP3C_HUMAN	39.15	5	1	1	iTRAQ 4plex (K N-term)	23712	Actin-related protein 3C OS=Homo sapiens GN=ACTR3C PE=2 SV=1
sp|Q08211|DHX9_HUMAN	39.14	1	1	1	iTRAQ 4plex (K N-term)	140958	ATP-dependent RNA helicase A OS=Homo sapiens GN=DHX9 PE=1 SV=4
tr|J3QQT9|J3QQT9_HUMAN	38.83	24	1	1	iTRAQ 4plex (K N-term)	3992	60S ribosomal protein L23 (Fragment) OS=Homo sapiens GN=RPL23 PE=1 SV=1
tr|H0Y6E7|H0Y6E7_HUMAN	37.02	3	1	1	iTRAQ 4plex (K N-term)	31865	RNA-binding motif protein X chromosome (Fragment) OS=Homo sapiens GN=RBMX PE=1 SV=2
tr|H3BT71|H3BT71_HUMAN	37.02	3	1	1	iTRAQ 4plex (K N-term)	32197	RNA-binding motif protein X chromosome OS=Homo sapiens GN=RBMX PE=1 SV=1
sp|P38159|RBMX_HUMAN	37.02	2	1	1	iTRAQ 4plex (K N-term)	42332	RNA-binding motif protein X chromosome OS=Homo sapiens GN=RBMX PE=1 SV=3
tr|H3BR27|H3BR27_HUMAN	37.02	10	1	1	iTRAQ 4plex (K N-term)	8610	RNA-binding motif protein X chromosome OS=Homo sapiens GN=RBMX PE=1 SV=1
tr|H3BNC1|H3BNC1_HUMAN	37.02	22	1	1	iTRAQ 4plex (K N-term)	4011	RNA-binding motif protein X chromosome OS=Homo sapiens GN=RBMX PE=1 SV=1
sp|P12883|MYH7_HUMAN	36.97	0	1	1	iTRAQ 4plex (K N-term)	223095	Myosin-7 OS=Homo sapiens GN=MYH7 PE=1 SV=5
sp|Q8TD26|CHD6_HUMAN	36.8	0	1	1		305412	Chromodomain-helicase-DNA-binding protein 6 OS=Homo sapiens GN=CHD6 PE=1 SV=4
tr|D6RA82|D6RA82_HUMAN	36.77	3	1	1	iTRAQ 4plex (K N-term)	32119	Annexin OS=Homo sapiens GN=ANXA3 PE=1 SV=1
sp|P12429|ANXA3_HUMAN	36.77	3	1	1	iTRAQ 4plex (K N-term)	36375	Annexin A3 OS=Homo sapiens GN=ANXA3 PE=1 SV=3
tr|J3KTN0|J3KTN0_HUMAN	36.76	7	1	1	iTRAQ 4plex (K N-term)	13906	Eukaryotic initiation factor 4A-I (Fragment) OS=Homo sapiens GN=EIF4A1 PE=1 SV=1
tr|K7ELR7|K7ELR7_HUMAN	36.76	5	1	1	iTRAQ 4plex (K N-term)	16810	Glucose-6-phosphate isomerase (Fragment) OS=Homo sapiens GN=GPI PE=1 SV=1
tr|K7EP41|K7EP41_HUMAN	36.76	5	1	1	iTRAQ 4plex (K N-term)	18349	Glucose-6-phosphate isomerase (Fragment) OS=Homo sapiens GN=GPI PE=1 SV=1
tr|K7EPY4|K7EPY4_HUMAN	36.76	5	1	1	iTRAQ 4plex (K N-term)	19231	Glucose-6-phosphate isomerase (Fragment) OS=Homo sapiens GN=GPI PE=1 SV=7
tr|A0A0J9YXP8|A0A0J9YXP8_HUMAN	36.76	3	1	1	iTRAQ 4plex (K N-term)	30371	Glucose-6-phosphate isomerase (Fragment) OS=Homo sapiens GN=GPI PE=1 SV=1
tr|A0A0J9YX90|A0A0J9YX90_HUMAN	36.76	3	1	1	iTRAQ 4plex (K N-term)	31548	Glucose-6-phosphate isomerase (Fragment) OS=Homo sapiens GN=GPI PE=1 SV=1
tr|A0A0J9YYH3|A0A0J9YYH3_HUMAN	36.76	3	1	1	iTRAQ 4plex (K N-term)	32049	Glucose-6-phosphate isomerase (Fragment) OS=Homo sapiens GN=GPI PE=1 SV=1
tr|K7EQ48|K7EQ48_HUMAN	36.76	2	1	1	iTRAQ 4plex (K N-term)	53402	Glucose-6-phosphate isomerase OS=Homo sapiens GN=GPI PE=1 SV=2
sp|P06744|G6PI_HUMAN	36.76	1	1	1	iTRAQ 4plex (K N-term)	63147	Glucose-6-phosphate isomerase OS=Homo sapiens GN=GPI PE=1 SV=4
tr|A0A0A0MTS2|A0A0A0MTS2_HUMAN	36.76	1	1	1	iTRAQ 4plex (K N-term)	64825	Glucose-6-phosphate isomerase (Fragment) OS=Homo sapiens GN=GPI PE=1 SV=1
sp|Q8N1K5|THMS1_HUMAN	36.61	1	1	1	iTRAQ 4plex (K N-term)	73452	Protein THEMIS OS=Homo sapiens GN=THEMIS PE=1 SV=3
tr|M0QZL7|M0QZL7_HUMAN	36.58	16	1	1	iTRAQ 4plex (K N-term)	16669	Tubulin beta-4A chain (Fragment) OS=Homo sapiens GN=TUBB4A PE=1 SV=7
tr|M0R278|M0R278_HUMAN	36.58	16	1	1	iTRAQ 4plex (K N-term)	17642	Tubulin beta-4A chain (Fragment) OS=Homo sapiens GN=TUBB4A PE=1 SV=1
tr|H0Y3Z3|H0Y3Z3_HUMAN	36.31	3	1	1	iTRAQ 4plex (K N-term)	31552	Protein disulfide-isomerase (Fragment) OS=Homo sapiens GN=P4HB PE=1 SV=1
sp|Q9Y3U8|RL36_HUMAN	35.88	9	1	1	iTRAQ 4plex (K N-term); iTRAQ 4plex (Y)	12254	60S ribosomal protein L36 OS=Homo sapiens GN=RPL36 PE=1 SV=3
tr|J3KTD3|J3KTD3_HUMAN	35.88	13	1	1	iTRAQ 4plex (K N-term); iTRAQ 4plex (Y)	7559	60S ribosomal protein L36 (Fragment) OS=Homo sapiens GN=RPL36 PE=1 SV=1
tr|J3QSB5|J3QSB5_HUMAN	35.88	10	1	1	iTRAQ 4plex (K N-term); iTRAQ 4plex (Y)	10789	60S ribosomal protein L36 OS=Homo sapiens GN=RPL36 PE=1 SV=1
sp|Q8NC51|PAIRB_HUMAN	35.42	2	1	1	iTRAQ 4plex (K N-term)	44965	Plasminogen activator inhibitor 1 RNA-binding protein OS=Homo sapiens GN=SERBP1 PE=1 SV=2
tr|G3V5X6|G3V5X6_HUMAN	35.33	8	1	1	iTRAQ 4plex (K N-term)	12781	Heterogeneous nuclear ribonucleoproteins C1/C2 (Fragment) OS=Homo sapiens GN=HNRNPC PE=1 SV=1
tr|G3V3K6|G3V3K6_HUMAN	35.33	7	1	1	iTRAQ 4plex (K N-term)	13337	Heterogeneous nuclear ribonucleoproteins C1/C2 (Fragment) OS=Homo sapiens GN=HNRNPC PE=1 SV=1
tr|G3V251|G3V251_HUMAN	35.33	7	1	1	iTRAQ 4plex (K N-term)	14038	Heterogeneous nuclear ribonucleoproteins C1/C2 (Fragment) OS=Homo sapiens GN=HNRNPC PE=1 SV=1
tr|B4DSU6|B4DSU6_HUMAN	35.33	6	1	1	iTRAQ 4plex (K N-term)	15735	Heterogeneous nuclear ribonucleoproteins C1/C2 OS=Homo sapiens GN=HNRNPC PE=1 SV=1
sp|P26447|S10A4_HUMAN	35.26	8	1	1	iTRAQ 4plex (K N-term)	11729	Protein S100-A4 OS=Homo sapiens GN=S100A4 PE=1 SV=1
tr|H0YB22|H0YB22_HUMAN	35.22	9	1	1	iTRAQ 4plex (K N-term)	12951	40S ribosomal protein S14 (Fragment) OS=Homo sapiens GN=RPS14 PE=1 SV=1
tr|F8WBR5|F8WBR5_HUMAN	35.08	11	1	1	iTRAQ 4plex (K N-term)	7372	Calmodulin OS=Homo sapiens GN=CALM2 PE=1 SV=1
tr|G3V479|G3V479_HUMAN	35.08	8	1	1	iTRAQ 4plex (K N-term)	9598	Calmodulin OS=Homo sapiens GN=CALM1 PE=1 SV=1
sp|O14556|G3PT_HUMAN	34.92	2	1	1	iTRAQ 4plex (K N-term)	44501	Glyceraldehyde-3-phosphate dehydrogenase testis-specific OS=Homo sapiens GN=GAPDHS PE=1 SV=2
tr|Q5T7C4|Q5T7C4_HUMAN	34.85	5	1	1	iTRAQ 4plex (K N-term)	18311	High mobility group protein B1 OS=Homo sapiens GN=HMGB1 PE=1 SV=1
sp|B2RPK0|HGB1A_HUMAN	34.85	4	1	1	iTRAQ 4plex (K N-term)	24238	Putative high mobility group protein B1-like 1 OS=Homo sapiens GN=HMGB1P1 PE=5 SV=1
tr|K7EJB9|K7EJB9_HUMAN	34.77	2	1	1	iTRAQ 4plex (K N-term)	28432	Calreticulin (Fragment) OS=Homo sapiens GN=CALR PE=1 SV=1
tr|H0Y9L1|H0Y9L1_HUMAN	34.54	23	1	1	iTRAQ 4plex (K N-term)	4229	E3 ubiquitin-protein ligase NEDD4 (Fragment) OS=Homo sapiens GN=NEDD4 PE=1 SV=1
sp|P62906|RL10A_HUMAN	34.52	4	1	1	iTRAQ 4plex (K N-term)	24831	60S ribosomal protein L10a OS=Homo sapiens GN=RPL10A PE=1 SV=2
tr|J3KQ99|J3KQ99_HUMAN	34.43	3	1	1		24059	HLA class II histocompatibility antigen DP alpha 1 chain (Fragment) OS=Homo sapiens GN=HLA-DPA1 PE=1 SV=1
tr|A0A140T9D6|A0A140T9D6_HUMAN	34.43	3	1	1		24059	HLA class II histocompatibility antigen DP alpha 1 chain (Fragment) OS=Homo sapiens GN=HLA-DPA1 PE=1 SV=1
tr|F5H6I8|F5H6I8_HUMAN	34.43	1	1	1		85553	Unconventional myosin-XVIIIb OS=Homo sapiens GN=MYO18B PE=1 SV=1
sp|Q8IUG5|MY18B_HUMAN	34.43	0	1	1		285183	Unconventional myosin-XVIIIb OS=Homo sapiens GN=MYO18B PE=1 SV=1
tr|A0A075B6F5|A0A075B6F5_HUMAN	34.43	0	1	1		285213	Unconventional myosin-XVIIIb OS=Homo sapiens GN=MYO18B PE=1 SV=1
tr|F5GXR6|F5GXR6_HUMAN	34.43	0	1	1		285341	Unconventional myosin-XVIIIb OS=Homo sapiens GN=MYO18B PE=1 SV=1
tr|A0A087WTP3|A0A087WTP3_HUMAN	34.4	3	2	1	iTRAQ 4plex (K N-term)	73028	Far upstream element-binding protein 2 OS=Homo sapiens GN=KHSRP PE=1 SV=1
sp|Q92945|FUBP2_HUMAN	34.4	3	2	1	iTRAQ 4plex (K N-term)	73115	Far upstream element-binding protein 2 OS=Homo sapiens GN=KHSRP PE=1 SV=4
tr|M0QXW7|M0QXW7_HUMAN	34.4	17	2	1	iTRAQ 4plex (K N-term)	12086	Far upstream element-binding protein 2 (Fragment) OS=Homo sapiens GN=KHSRP PE=1 SV=1
tr|M0QYH3|M0QYH3_HUMAN	34.4	12	2	1	iTRAQ 4plex (K N-term)	18017	Far upstream element-binding protein 2 (Fragment) OS=Homo sapiens GN=KHSRP PE=1 SV=1
sp|Q8NGI9|OR5A2_HUMAN	34.31	3	1	1	iTRAQ 4plex (K N-term)	36016	Olfactory receptor 5A2 OS=Homo sapiens GN=OR5A2 PE=2 SV=1
tr|M0QZN2|M0QZN2_HUMAN	34.06	7	1	1	iTRAQ 4plex (K N-term)	14763	40S ribosomal protein S5 OS=Homo sapiens GN=RPS5 PE=1 SV=1
tr|E7ESE0|E7ESE0_HUMAN	33.8	4	1	1	iTRAQ 4plex (K N-term)	18900	60S ribosomal protein L9 (Fragment) OS=Homo sapiens GN=RPL9 PE=1 SV=1
tr|D6RAN4|D6RAN4_HUMAN	33.8	4	1	1	iTRAQ 4plex (K N-term)	20874	60S ribosomal protein L9 (Fragment) OS=Homo sapiens GN=RPL9 PE=1 SV=7
tr|H0Y9V9|H0Y9V9_HUMAN	33.8	4	1	1	iTRAQ 4plex (K N-term)	21578	60S ribosomal protein L9 (Fragment) OS=Homo sapiens GN=RPL9 PE=1 SV=1
sp|P32969|RL9_HUMAN	33.8	4	1	1	iTRAQ 4plex (K N-term)	21863	60S ribosomal protein L9 OS=Homo sapiens GN=RPL9 PE=1 SV=1
sp|Q99453|PHX2B_HUMAN	33.64	4	1	1	iTRAQ 4plex (K N-term)	31621	Paired mesoderm homeobox protein 2B OS=Homo sapiens GN=PHOX2B PE=1 SV=2
tr|B7Z645|B7Z645_HUMAN	33.59	2	1	1	iTRAQ 4plex (K N-term)	52046	Heterogeneous nuclear ribonucleoprotein Q OS=Homo sapiens GN=SYNCRIP PE=1 SV=1
sp|O60506|HNRPQ_HUMAN	33.59	1	1	1	iTRAQ 4plex (K N-term)	69603	Heterogeneous nuclear ribonucleoprotein Q OS=Homo sapiens GN=SYNCRIP PE=1 SV=2
sp|O43390|HNRPR_HUMAN	33.59	1	1	1	iTRAQ 4plex (K N-term)	70943	Heterogeneous nuclear ribonucleoprotein R OS=Homo sapiens GN=HNRNPR PE=1 SV=1
tr|B4DT28|B4DT28_HUMAN	33.59	2	1	1	iTRAQ 4plex (K N-term)	55718	Heterogeneous nuclear ribonucleoprotein R OS=Homo sapiens GN=HNRNPR PE=1 SV=1
sp|Q99832|TCPH_HUMAN	33.55	1	1	1	iTRAQ 4plex (K N-term)	59367	T-complex protein 1 subunit eta OS=Homo sapiens GN=CCT7 PE=1 SV=2
tr|K7EJ74|K7EJ74_HUMAN	33.37	7	1	1	iTRAQ 4plex (K N-term)	14929	116 kDa U5 small nuclear ribonucleoprotein component (Fragment) OS=Homo sapiens GN=EFTUD2 PE=1 SV=1
tr|K7EP67|K7EP67_HUMAN	33.37	4	1	1	iTRAQ 4plex (K N-term)	25074	116 kDa U5 small nuclear ribonucleoprotein component (Fragment) OS=Homo sapiens GN=EFTUD2 PE=1 SV=1
sp|Q15029|U5S1_HUMAN	33.37	1	1	1	iTRAQ 4plex (K N-term)	109436	116 kDa U5 small nuclear ribonucleoprotein component OS=Homo sapiens GN=EFTUD2 PE=1 SV=1
tr|E9PBF6|E9PBF6_HUMAN	33.31	2	1	1	iTRAQ 4plex (K N-term)	44643	Lamin-B1 OS=Homo sapiens GN=LMNB1 PE=1 SV=1
sp|P20700|LMNB1_HUMAN	33.31	1	1	1	iTRAQ 4plex (K N-term)	66408	Lamin-B1 OS=Homo sapiens GN=LMNB1 PE=1 SV=2
sp|P33993|MCM7_HUMAN	32.89	1	1	1	iTRAQ 4plex (K N-term)	81308	DNA replication licensing factor MCM7 OS=Homo sapiens GN=MCM7 PE=1 SV=4
tr|K7ELP4|K7ELP4_HUMAN	32.83	4	1	1	iTRAQ 4plex (K N-term)	21280	Glial fibrillary acidic protein (Fragment) OS=Homo sapiens GN=GFAP PE=1 SV=1
tr|K7EKH9|K7EKH9_HUMAN	32.83	3	1	1	iTRAQ 4plex (K N-term)	29810	Glial fibrillary acidic protein (Fragment) OS=Homo sapiens GN=GFAP PE=1 SV=1
tr|U3KPR1|U3KPR1_HUMAN	32.83	5	1	1	iTRAQ 4plex (K N-term)	15382	Keratin type II cuticular Hb6 (Fragment) OS=Homo sapiens GN=KRT86 PE=1 SV=1
tr|F8W0C6|F8W0C6_HUMAN	32.83	4	1	1	iTRAQ 4plex (K N-term)	20656	Keratin type II cytoskeletal 5 (Fragment) OS=Homo sapiens GN=KRT5 PE=1 SV=7
tr|F8VUG2|F8VUG2_HUMAN	32.83	3	1	1	iTRAQ 4plex (K N-term)	30907	Keratin type II cytoskeletal 8 (Fragment) OS=Homo sapiens GN=KRT8 PE=1 SV=1
tr|F8W1U3|F8W1U3_HUMAN	32.83	2	1	1	iTRAQ 4plex (K N-term)	32549	Keratin type II cytoskeletal 8 (Fragment) OS=Homo sapiens GN=KRT8 PE=1 SV=1
sp|Q8N1N4|K2C78_HUMAN	32.83	1	1	1	iTRAQ 4plex (K N-term)	56866	Keratin type II cytoskeletal 78 OS=Homo sapiens GN=KRT78 PE=2 SV=2
sp|P19013|K2C4_HUMAN	32.83	1	1	1	iTRAQ 4plex (K N-term)	57285	Keratin type II cytoskeletal 4 OS=Homo sapiens GN=KRT4 PE=1 SV=4
tr|A0A087X106|A0A087X106_HUMAN	32.83	1	1	1	iTRAQ 4plex (K N-term)	53116	Keratin type II cuticular Hb1 OS=Homo sapiens GN=KRT81 PE=1 SV=1
sp|O43790|KRT86_HUMAN	32.83	1	1	1	iTRAQ 4plex (K N-term)	53501	Keratin type II cuticular Hb6 OS=Homo sapiens GN=KRT86 PE=1 SV=1
sp|P78385|KRT83_HUMAN	32.83	1	1	1	iTRAQ 4plex (K N-term)	54195	Keratin type II cuticular Hb3 OS=Homo sapiens GN=KRT83 PE=1 SV=2
sp|Q14533|KRT81_HUMAN	32.83	1	1	1	iTRAQ 4plex (K N-term)	54928	Keratin type II cuticular Hb1 OS=Homo sapiens GN=KRT81 PE=1 SV=3
sp|P78386|KRT85_HUMAN	32.83	1	1	1	iTRAQ 4plex (K N-term)	55802	Keratin type II cuticular Hb5 OS=Homo sapiens GN=KRT85 PE=1 SV=1
sp|O95678|K2C75_HUMAN	32.83	1	1	1	iTRAQ 4plex (K N-term)	59560	Keratin type II cytoskeletal 75 OS=Homo sapiens GN=KRT75 PE=1 SV=2
sp|Q5XKE5|K2C79_HUMAN	32.83	1	1	1	iTRAQ 4plex (K N-term)	57836	Keratin type II cytoskeletal 79 OS=Homo sapiens GN=KRT79 PE=1 SV=2
sp|P02538|K2C6A_HUMAN	32.83	1	1	1	iTRAQ 4plex (K N-term)	60045	Keratin type II cytoskeletal 6A OS=Homo sapiens GN=KRT6A PE=1 SV=3
sp|P48668|K2C6C_HUMAN	32.83	1	1	1	iTRAQ 4plex (K N-term)	60025	Keratin type II cytoskeletal 6C OS=Homo sapiens GN=KRT6C PE=1 SV=3
sp|P04259|K2C6B_HUMAN	32.83	1	1	1	iTRAQ 4plex (K N-term)	60067	Keratin type II cytoskeletal 6B OS=Homo sapiens GN=KRT6B PE=1 SV=5
sp|P12035|K2C3_HUMAN	32.83	1	1	1	iTRAQ 4plex (K N-term)	64417	Keratin type II cytoskeletal 3 OS=Homo sapiens GN=KRT3 PE=1 SV=3
sp|Q01546|K22O_HUMAN	32.83	1	1	1	iTRAQ 4plex (K N-term)	65841	Keratin type II cytoskeletal 2 oral OS=Homo sapiens GN=KRT76 PE=1 SV=2
tr|Q8IWY7|Q8IWY7_HUMAN	32.83	0	1	1	iTRAQ 4plex (K N-term)	182466	Tau-tubulin kinase OS=Homo sapiens GN=TTBK2 PE=1 SV=1
tr|H3BN98|H3BN98_HUMAN	32.59	3	1	1	iTRAQ 4plex (K N-term)	27168	Uncharacterized protein (Fragment) OS=Homo sapiens PE=4 SV=2
tr|I3L246|I3L246_HUMAN	32.59	7	1	1	iTRAQ 4plex (K N-term)	12303	40S ribosomal protein S15a OS=Homo sapiens GN=RPS15A PE=1 SV=1
tr|H7C0U5|H7C0U5_HUMAN	32.49	1	1	1	iTRAQ 4plex (K N-term)	133579	ATP-binding cassette sub-family A member 13 (Fragment) OS=Homo sapiens GN=ABCA13 PE=1 SV=2
tr|F5H7B7|F5H7B7_HUMAN	32.49	0	1	1	iTRAQ 4plex (K N-term)	267003	ATP-binding cassette sub-family A member 13 (Fragment) OS=Homo sapiens GN=ABCA13 PE=1 SV=2
sp|Q86UQ4|ABCAD_HUMAN	32.49	0	1	1	iTRAQ 4plex (K N-term)	576166	ATP-binding cassette sub-family A member 13 OS=Homo sapiens GN=ABCA13 PE=2 SV=3
tr|A0A0A0MT16|A0A0A0MT16_HUMAN	32.49	0	1	1	iTRAQ 4plex (K N-term)	576167	ATP-binding cassette sub-family A member 13 OS=Homo sapiens GN=ABCA13 PE=1 SV=1
tr|D6RFL1|D6RFL1_HUMAN	32.16	5	1	1	iTRAQ 4plex (K N-term)	15161	Calnexin (Fragment) OS=Homo sapiens GN=CANX PE=1 SV=1
tr|D6RAU8|D6RAU8_HUMAN	32.16	5	1	1	iTRAQ 4plex (K N-term)	14804	Calnexin (Fragment) OS=Homo sapiens GN=CANX PE=1 SV=1
tr|D6RB85|D6RB85_HUMAN	32.16	5	1	1	iTRAQ 4plex (K N-term)	16008	Calnexin (Fragment) OS=Homo sapiens GN=CANX PE=1 SV=1
tr|D6RDP7|D6RDP7_HUMAN	32.16	4	1	1	iTRAQ 4plex (K N-term)	18658	Calnexin (Fragment) OS=Homo sapiens GN=CANX PE=1 SV=1
tr|H0Y9Q7|H0Y9Q7_HUMAN	32.16	4	1	1	iTRAQ 4plex (K N-term)	18838	Calnexin (Fragment) OS=Homo sapiens GN=CANX PE=1 SV=1
tr|H0Y9H1|H0Y9H1_HUMAN	32.16	4	1	1	iTRAQ 4plex (K N-term)	21541	Calnexin (Fragment) OS=Homo sapiens GN=CANX PE=1 SV=7
tr|D6RGY2|D6RGY2_HUMAN	32.16	2	1	1	iTRAQ 4plex (K N-term)	35178	Calnexin (Fragment) OS=Homo sapiens GN=CANX PE=1 SV=1
sp|P27824|CALX_HUMAN	32.16	1	1	1	iTRAQ 4plex (K N-term)	67568	Calnexin OS=Homo sapiens GN=CANX PE=1 SV=2
sp|P29622|KAIN_HUMAN	31.81	2	1	1	iTRAQ 4plex (K N-term)	48542	Kallistatin OS=Homo sapiens GN=SERPINA4 PE=1 SV=3
sp|P49792|RBP2_HUMAN	31.3	0	1	1	iTRAQ 4plex (K N-term)	358201	E3 SUMO-protein ligase RanBP2 OS=Homo sapiens GN=RANBP2 PE=1 SV=2
tr|H7C123|H7C123_HUMAN	31.27	9	1	1	iTRAQ 4plex (K N-term)	10028	60S ribosomal protein L10 (Fragment) OS=Homo sapiens GN=RPL10 PE=1 SV=1
tr|H7C2C5|H7C2C5_HUMAN	31.27	6	1	1	iTRAQ 4plex (K N-term)	14597	60S ribosomal protein L10 (Fragment) OS=Homo sapiens GN=RPL10 PE=1 SV=1
tr|F8W7C6|F8W7C6_HUMAN	31.27	5	1	1	iTRAQ 4plex (K N-term)	18565	60S ribosomal protein L10 OS=Homo sapiens GN=RPL10 PE=1 SV=2
tr|A0A087WV22|A0A087WV22_HUMAN	31.27	4	1	1	iTRAQ 4plex (K N-term)	20439	60S ribosomal protein L10 OS=Homo sapiens GN=RPL10 PE=1 SV=1
tr|J3KNK1|J3KNK1_HUMAN	30.97	2	1	1	iTRAQ 4plex (K N-term)	38226	Mitogen-activated protein kinase OS=Homo sapiens GN=MAPK9 PE=1 SV=1
sp|P45984|MK09_HUMAN	30.97	2	1	1	iTRAQ 4plex (K N-term)	48139	Mitogen-activated protein kinase 9 OS=Homo sapiens GN=MAPK9 PE=1 SV=2
tr|Q8TCE1|Q8TCE1_HUMAN	30.91	3	1	1	iTRAQ 4plex (K N-term)	29092	Antithrombin-III OS=Homo sapiens GN=SERPINC1 PE=1 SV=1
sp|Q00341|VIGLN_HUMAN	30.66	1	1	1	Deamidation (NQ); iTRAQ 4plex (K N-term)	141455	Vigilin OS=Homo sapiens GN=HDLBP PE=1 SV=2
tr|B4DUR8|B4DUR8_HUMAN	30.05	2	1	1	iTRAQ 4plex (K N-term)	55674	T-complex protein 1 subunit gamma OS=Homo sapiens GN=CCT3 PE=1 SV=1
sp|Q99525|H4G_HUMAN	30.04	8	1	1	iTRAQ 4plex (K N-term)	11009	Histone H4-like protein type G OS=Homo sapiens GN=HIST1H4G PE=1 SV=1
sp|Q03181|PPARD_HUMAN	29.82	2	1	1	Pyro-glu from E; iTRAQ 4plex (K N-term)	49903	Peroxisome proliferator-activated receptor delta OS=Homo sapiens GN=PPARD PE=1 SV=1
sp|Q92526|TCPW_HUMAN	29.66	1	1	1	iTRAQ 4plex (K N-term)	57821	T-complex protein 1 subunit zeta-2 OS=Homo sapiens GN=CCT6B PE=1 SV=5
sp|Q05707|COEA1_HUMAN	29.4	1	1	1	iTRAQ 4plex (K N-term)	193513	Collagen alpha-1(XIV) chain OS=Homo sapiens GN=COL14A1 PE=1 SV=3
sp|Q96Q06|PLIN4_HUMAN	29.05	1	1	1	iTRAQ 4plex (K N-term)	134431	Perilipin-4 OS=Homo sapiens GN=PLIN4 PE=1 SV=2
tr|A0A0J9YXN7|A0A0J9YXN7_HUMAN	29.05	1	1	1	iTRAQ 4plex (K N-term)	136020	Perilipin-4 OS=Homo sapiens GN=PLIN4 PE=1 SV=1
tr|B7ZL25|B7ZL25_HUMAN	29.01	1	1	1	iTRAQ 4plex (K N-term)	118376	VARS2 protein OS=Homo sapiens GN=VARS2 PE=1 SV=1
tr|A0A0A0MTG1|A0A0A0MTG1_HUMAN	29.01	1	1	1	iTRAQ 4plex (K N-term)	118362	Valine--tRNA ligase mitochondrial OS=Homo sapiens GN=VARS2 PE=1 SV=1
tr|A0A140TA40|A0A140TA40_HUMAN	29.01	1	1	1	iTRAQ 4plex (K N-term)	118334	Valine--tRNA ligase mitochondrial OS=Homo sapiens GN=VARS2 PE=1 SV=1
tr|A0A140TA45|A0A140TA45_HUMAN	29.01	1	1	1	iTRAQ 4plex (K N-term)	118304	Valine--tRNA ligase mitochondrial OS=Homo sapiens GN=VARS2 PE=1 SV=1
sp|Q5ST30|SYVM_HUMAN	29.01	1	1	1	iTRAQ 4plex (K N-term)	118490	Valine--tRNA ligase mitochondrial OS=Homo sapiens GN=VARS2 PE=1 SV=2
tr|A0A140T8Y0|A0A140T8Y0_HUMAN	29.01	1	1	1	iTRAQ 4plex (K N-term)	118462	Valine--tRNA ligase mitochondrial OS=Homo sapiens GN=VARS2 PE=1 SV=1
tr|B4E0K6|B4E0K6_HUMAN	29.01	1	1	1	iTRAQ 4plex (K N-term)	118504	Valine--tRNA ligase mitochondrial OS=Homo sapiens GN=VARS2 PE=1 SV=1
tr|A0A0G2JIA5|A0A0G2JIA5_HUMAN	29.01	1	1	1	iTRAQ 4plex (K N-term)	118432	Valine--tRNA ligase mitochondrial OS=Homo sapiens GN=VARS2 PE=1 SV=1
tr|A0A0G2JL52|A0A0G2JL52_HUMAN	29.01	1	1	1	iTRAQ 4plex (K N-term)	121557	Valine--tRNA ligase mitochondrial OS=Homo sapiens GN=VARS2 PE=1 SV=1
tr|A0A140TA35|A0A140TA35_HUMAN	29.01	1	1	1	iTRAQ 4plex (K N-term)	121515	Valine--tRNA ligase mitochondrial OS=Homo sapiens GN=VARS2 PE=1 SV=1
tr|A0A140TA36|A0A140TA36_HUMAN	29.01	1	1	1	iTRAQ 4plex (K N-term)	121485	Valine--tRNA ligase mitochondrial OS=Homo sapiens GN=VARS2 PE=1 SV=1
tr|C9JLK0|C9JLK0_HUMAN	28.97	15	1	1	iTRAQ 4plex (K N-term)	18843	Bifunctional purine biosynthesis protein PURH (Fragment) OS=Homo sapiens GN=ATIC PE=1 SV=1
tr|H0YMA2|H0YMA2_HUMAN	28.58	6	1	1	iTRAQ 4plex (K N-term)	12399	Tropomodulin-2 (Fragment) OS=Homo sapiens GN=TMOD2 PE=1 SV=1
tr|G5EA42|G5EA42_HUMAN	28.58	2	1	1	iTRAQ 4plex (K N-term)	34492	Tropomodulin 2 (Neuronal) isoform CRA_a OS=Homo sapiens GN=TMOD2 PE=1 SV=1
sp|Q9NZR1|TMOD2_HUMAN	28.58	2	1	1	iTRAQ 4plex (K N-term)	39595	Tropomodulin-2 OS=Homo sapiens GN=TMOD2 PE=1 SV=1
tr|C9J6B6|C9J6B6_HUMAN	28.48	1	1	1	iTRAQ 4plex (K N-term)	82495	Eukaryotic translation initiation factor 4 gamma 1 (Fragment) OS=Homo sapiens GN=EIF4G1 PE=1 SV=1
tr|C9JF13|C9JF13_HUMAN	28.48	1	1	1	iTRAQ 4plex (K N-term)	98227	Eukaryotic translation initiation factor 4 gamma 1 (Fragment) OS=Homo sapiens GN=EIF4G1 PE=1 SV=1
sp|Q04637|IF4G1_HUMAN	28.48	1	1	1	iTRAQ 4plex (K N-term)	175490	Eukaryotic translation initiation factor 4 gamma 1 OS=Homo sapiens GN=EIF4G1 PE=1 SV=4
tr|H0YGG5|H0YGG5_HUMAN	27.49	1	1	1	iTRAQ 4plex (K N-term)	110566	Alpha-2-macroglobulin-like protein 1 (Fragment) OS=Homo sapiens GN=A2ML1 PE=1 SV=1
sp|A8K2U0|A2ML1_HUMAN	27.49	0	1	1	iTRAQ 4plex (K N-term)	161106	Alpha-2-macroglobulin-like protein 1 OS=Homo sapiens GN=A2ML1 PE=1 SV=3
sp|P01031|CO5_HUMAN	27.49	0	1	1	iTRAQ 4plex (K N-term)	188304	Complement C5 OS=Homo sapiens GN=C5 PE=1 SV=4
tr|F8VWZ8|F8VWZ8_HUMAN	27.32	1	1	1	iTRAQ 4plex (K N-term)	117425	Rho GTPase-activating protein 29 OS=Homo sapiens GN=ARHGAP29 PE=1 SV=1
sp|Q52LW3|RHG29_HUMAN	27.32	1	1	1	iTRAQ 4plex (K N-term)	142063	Rho GTPase-activating protein 29 OS=Homo sapiens GN=ARHGAP29 PE=1 SV=2
sp|Q14152|EIF3A_HUMAN	27.32	1	1	1	iTRAQ 4plex (K N-term)	166569	Eukaryotic translation initiation factor 3 subunit A OS=Homo sapiens GN=EIF3A PE=1 SV=1
tr|H7C2F8|H7C2F8_HUMAN	27.28	6	1	1	iTRAQ 4plex (K N-term)	11635	Sentrin-specific protease 5 (Fragment) OS=Homo sapiens GN=SENP5 PE=1 SV=1
tr|H3BND8|H3BND8_HUMAN	27.28	1	1	1	iTRAQ 4plex (K N-term)	105549	Ubiquitin carboxyl-terminal hydrolase 7 (Fragment) OS=Homo sapiens GN=USP7 PE=1 SV=1
sp|Q13029|PRDM2_HUMAN	27.04	0	1	1		188914	PR domain zinc finger protein 2 OS=Homo sapiens GN=PRDM2 PE=1 SV=3
tr|A0A0C4DFX2|A0A0C4DFX2_HUMAN	26.82	0	1	1	Deamidation (NQ); iTRAQ 4plex (K N-term)	338179	Protein furry homolog OS=Homo sapiens GN=FRY PE=1 SV=1
sp|Q5TBA9|FRY_HUMAN	26.82	0	1	1	Deamidation (NQ); iTRAQ 4plex (K N-term)	338875	Protein furry homolog OS=Homo sapiens GN=FRY PE=1 SV=1
sp|Q8WXG9|GPR98_HUMAN	26.82	0	1	1	Deamidation (NQ); iTRAQ 4plex (K N-term)	693082	G-protein coupled receptor 98 OS=Homo sapiens GN=GPR98 PE=1 SV=2
tr|H7C077|H7C077_HUMAN	26.66	7	1	1	iTRAQ 4plex (K N-term)	13831	Putative SEC14-like protein 6 (Fragment) OS=Homo sapiens GN=SEC14L6 PE=4 SV=1
sp|P46013|KI67_HUMAN	26.63	0	1	1	Deamidation (NQ); iTRAQ 4plex (K N-term)	358695	Antigen KI-67 OS=Homo sapiens GN=MKI67 PE=1 SV=2
tr|A0A087WV66|A0A087WV66_HUMAN	26.63	0	1	1	Deamidation (NQ); iTRAQ 4plex (K N-term)	358628	Antigen KI-67 OS=Homo sapiens GN=MKI67 PE=1 SV=1
tr|G3V2B9|G3V2B9_HUMAN	26.63	7	1	1	iTRAQ 4plex (K N-term)	11798	Alpha-1-antitrypsin (Fragment) OS=Homo sapiens GN=SERPINA1 PE=1 SV=1
sp|P01009|A1AT_HUMAN	26.63	2	1	1	iTRAQ 4plex (K N-term)	46737	Alpha-1-antitrypsin OS=Homo sapiens GN=SERPINA1 PE=1 SV=3
tr|A0A024R6I7|A0A024R6I7_HUMAN	26.63	2	1	1	iTRAQ 4plex (K N-term)	46709	Alpha-1-antitrypsin OS=Homo sapiens GN=SERPINA1 PE=1 SV=1
tr|A0A0G2JRN3|A0A0G2JRN3_HUMAN	26.63	2	1	1	iTRAQ 4plex (K N-term)	40235	Alpha-1-antitrypsin OS=Homo sapiens GN=SERPINA1 PE=1 SV=1
tr|B4DXZ6|B4DXZ6_HUMAN	26.51	1	1	1	iTRAQ 4plex (K N-term)	68327	Fragile X mental retardation syndrome-related protein 1 OS=Homo sapiens GN=FXR1 PE=1 SV=1
sp|P51114|FXR1_HUMAN	26.51	1	1	1	iTRAQ 4plex (K N-term)	69721	Fragile X mental retardation syndrome-related protein 1 OS=Homo sapiens GN=FXR1 PE=1 SV=3
sp|P51116|FXR2_HUMAN	26.51	1	1	1	iTRAQ 4plex (K N-term)	74223	Fragile X mental retardation syndrome-related protein 2 OS=Homo sapiens GN=FXR2 PE=1 SV=2
tr|G3V0J0|G3V0J0_HUMAN	26.51	1	1	1	iTRAQ 4plex (K N-term)	66786	Fragile X mental retardation 1 isoform CRA_e OS=Homo sapiens GN=FMR1 PE=1 SV=1
tr|E7EU85|E7EU85_HUMAN	26.51	2	1	1	iTRAQ 4plex (K N-term)	50991	Fragile X mental retardation syndrome-related protein 1 OS=Homo sapiens GN=FXR1 PE=1 SV=1
tr|E9PFF5|E9PFF5_HUMAN	26.51	2	1	1	iTRAQ 4plex (K N-term)	55106	Fragile X mental retardation syndrome-related protein 1 OS=Homo sapiens GN=FXR1 PE=1 SV=1
sp|Q06787|FMR1_HUMAN	26.51	1	1	1	iTRAQ 4plex (K N-term)	71175	Synaptic functional regulator FMR1 OS=Homo sapiens GN=FMR1 PE=1 SV=1
tr|R9WNI0|R9WNI0_HUMAN	26.51	1	1	1	iTRAQ 4plex (K N-term)	61516	Fragile X mental retardation 1 OS=Homo sapiens GN=FMR1 PE=1 SV=1
tr|A8MQB8|A8MQB8_HUMAN	26.51	1	1	1	iTRAQ 4plex (K N-term)	65822	Fragile X mental retardation protein 1 OS=Homo sapiens GN=FMR1 PE=1 SV=1
sp|Q8N819|PPM1N_HUMAN	25.96	2	1	1		46170	Probable protein phosphatase 1N OS=Homo sapiens GN=PPM1N PE=2 SV=2
sp|O60884|DNJA2_HUMAN	25.52	6	1	1	iTRAQ 4plex (K N-term)	45746	DnaJ homolog subfamily A member 2 OS=Homo sapiens GN=DNAJA2 PE=1 SV=1
tr|H7C1J8|H7C1J8_HUMAN	25.23	6	1	1	iTRAQ 4plex (K N-term)	11298	Heterogeneous nuclear ribonucleoprotein A3 (Fragment) OS=Homo sapiens GN=HNRNPA3 PE=1 SV=1
tr|Q5VUC6|Q5VUC6_HUMAN	25.06	1	1	1	iTRAQ 4plex (K N-term)	56717	Glycylpeptide N-tetradecanoyltransferase OS=Homo sapiens GN=NMT2 PE=1 SV=1
sp|P30419|NMT1_HUMAN	25.06	1	1	1	iTRAQ 4plex (K N-term)	56806	Glycylpeptide N-tetradecanoyltransferase 1 OS=Homo sapiens GN=NMT1 PE=1 SV=2
sp|Q9Y5E8|PCDBF_HUMAN	24.93	1	1	1		86329	Protocadherin beta-15 OS=Homo sapiens GN=PCDHB15 PE=2 SV=1
tr|A0A096LPC0|A0A096LPC0_HUMAN	24.93	8	1	1		14283	Protocadherin beta-15 (Fragment) OS=Homo sapiens GN=PCDHB15 PE=4 SV=1
tr|H0YKD8|H0YKD8_HUMAN	24.77	4	1	1	iTRAQ 4plex (K N-term)	19072	60S ribosomal protein L28 OS=Homo sapiens GN=RPL28 PE=1 SV=1
tr|A0A096LNW2|A0A096LNW2_HUMAN	24.39	0	1	1	iTRAQ 4plex (K N-term)	547846	SCO-spondin OS=Homo sapiens GN=SSPO PE=4 SV=1
sp|Q92772|CDKL2_HUMAN	24.17	2	1	1	iTRAQ 4plex (K N-term)	56019	Cyclin-dependent kinase-like 2 OS=Homo sapiens GN=CDKL2 PE=1 SV=1
tr|J3KNE8|J3KNE8_HUMAN	24.17	1	1	1	iTRAQ 4plex (K N-term)	64840	Cyclin-dependent kinase-like 2 OS=Homo sapiens GN=CDKL2 PE=1 SV=1
tr|X6R3G6|X6R3G6_HUMAN	24.14	3	1	1	Deamidation (NQ); iTRAQ 4plex (K N-term)	37505	Lactadherin OS=Homo sapiens GN=MFGE8 PE=1 SV=1
sp|P46734|MP2K3_HUMAN	24.02	2	1	1	iTRAQ 4plex (K N-term)	39318	Dual specificity mitogen-activated protein kinase kinase 3 OS=Homo sapiens GN=MAP2K3 PE=1 SV=2
sp|Q9Y2F5|ICE1_HUMAN	24.02	0	1	1	iTRAQ 4plex (K N-term)	247889	Little elongation complex subunit 1 OS=Homo sapiens GN=ICE1 PE=1 SV=5
tr|E7ENU9|E7ENU9_HUMAN	23.93	3	1	1	iTRAQ 4plex (K N-term)	27793	Macrophage-capping protein (Fragment) OS=Homo sapiens GN=CAPG PE=1 SV=1
sp|P40121|CAPG_HUMAN	23.93	2	1	1	iTRAQ 4plex (K N-term)	38499	Macrophage-capping protein OS=Homo sapiens GN=CAPG PE=1 SV=2
tr|A0A0G2JRX8|A0A0G2JRX8_HUMAN	23.92	6	1	1	iTRAQ 4plex (K N-term)	12925	Melanoma antigen preferentially-expressed in tumors (Fragment) OS=Homo sapiens GN=PRAME PE=1 SV=1
tr|B5MCY4|B5MCY4_HUMAN	23.92	6	1	1	iTRAQ 4plex (K N-term)	13081	Melanoma antigen preferentially-expressed in tumors OS=Homo sapiens GN=PRAME PE=1 SV=1
tr|H7C2P3|H7C2P3_HUMAN	23.92	4	1	1	iTRAQ 4plex (K N-term)	21186	Melanoma antigen preferentially-expressed in tumors (Fragment) OS=Homo sapiens GN=PRAME PE=1 SV=1
tr|J3KNQ4|J3KNQ4_HUMAN	23.71	3	1	1	iTRAQ 4plex (K N-term)	46590	Alpha-parvin OS=Homo sapiens GN=PARVA PE=1 SV=1
sp|Q13049|TRI32_HUMAN	23.69	1	1	1	iTRAQ 4plex (K N-term); iTRAQ 4plex (Y)	71989	E3 ubiquitin-protein ligase TRIM32 OS=Homo sapiens GN=TRIM32 PE=1 SV=2
tr|E9PM09|E9PM09_HUMAN	23.67	5	1	1	iTRAQ 4plex (K N-term)	16881	T-complex protein 1 subunit gamma (Fragment) OS=Homo sapiens GN=CCT3 PE=1 SV=1
tr|Q9BS19|Q9BS19_HUMAN	23.55	2	1	1	iTRAQ 4plex (K N-term)	28630	HPX protein OS=Homo sapiens GN=HPX PE=1 SV=1
sp|P02790|HEMO_HUMAN	23.55	1	1	1	iTRAQ 4plex (K N-term)	51676	Hemopexin OS=Homo sapiens GN=HPX PE=1 SV=2
tr|E9PID8|E9PID8_HUMAN	23.27	2	1	1	iTRAQ 4plex (K N-term)	46666	Cleavage stimulation factor subunit 2 OS=Homo sapiens GN=CSTF2 PE=1 SV=1
sp|Q9H0L4|CSTFT_HUMAN	23.27	1	1	1	iTRAQ 4plex (K N-term)	64436	Cleavage stimulation factor subunit 2 tau variant OS=Homo sapiens GN=CSTF2T PE=1 SV=1
sp|Q9UKM9|RALY_HUMAN	23.23	2	1	1	iTRAQ 4plex (K N-term)	32463	RNA-binding protein Raly OS=Homo sapiens GN=RALY PE=1 SV=1
sp|Q709C8|VP13C_HUMAN	23.23	0	1	1	iTRAQ 4plex (K N-term)	422393	Vacuolar protein sorting-associated protein 13C OS=Homo sapiens GN=VPS13C PE=1 SV=1
sp|Q86VH2|KIF27_HUMAN	23.02	0	1	1	iTRAQ 4plex (K N-term)	160282	Kinesin-like protein KIF27 OS=Homo sapiens GN=KIF27 PE=2 SV=1
sp|Q5TAP6|UT14C_HUMAN	22.77	2	1	1	iTRAQ 4plex (K N-term)	87188	U3 small nucleolar RNA-associated protein 14 homolog C OS=Homo sapiens GN=UTP14C PE=1 SV=1
tr|A0A087WV45|A0A087WV45_HUMAN	22.65	4	1	1	iTRAQ 4plex (K N-term)	15120	Transthyretin OS=Homo sapiens GN=TTR PE=1 SV=1
sp|P02766|TTHY_HUMAN	22.65	4	1	1	iTRAQ 4plex (K N-term)	15887	Transthyretin OS=Homo sapiens GN=TTR PE=1 SV=1
tr|A0A087WT59|A0A087WT59_HUMAN	22.65	3	1	1	iTRAQ 4plex (K N-term)	20146	Transthyretin OS=Homo sapiens GN=TTR PE=1 SV=1
sp|Q9H3D4|P63_HUMAN	22.65	1	1	1	iTRAQ 4plex (K N-term)	76785	Tumor protein 63 OS=Homo sapiens GN=TP63 PE=1 SV=1
sp|O95373|IPO7_HUMAN	22.45	2	1	1		119516	Importin-7 OS=Homo sapiens GN=IPO7 PE=1 SV=1
tr|A0A140TA44|A0A140TA44_HUMAN	22.33	0	1	1	iTRAQ 4plex (K N-term)	187659	Complement C4-A OS=Homo sapiens GN=C4A PE=1 SV=1
sp|P0C0L4|CO4A_HUMAN	22.33	0	1	1	iTRAQ 4plex (K N-term)	192784	Complement C4-A OS=Homo sapiens GN=C4A PE=1 SV=2
sp|P0C0L5|CO4B_HUMAN	22.33	0	1	1	iTRAQ 4plex (K N-term)	192750	Complement C4-B OS=Homo sapiens GN=C4B PE=1 SV=2
tr|F8VZY9|F8VZY9_HUMAN	22.3	2	1	1	iTRAQ 4plex (K N-term)	43774	Keratin type I cytoskeletal 18 OS=Homo sapiens GN=KRT18 PE=1 SV=1
sp|P08779|K1C16_HUMAN	22.3	1	1	1	iTRAQ 4plex (K N-term)	51268	Keratin type I cytoskeletal 16 OS=Homo sapiens GN=KRT16 PE=1 SV=4
sp|P08727|K1C19_HUMAN	22.3	2	1	1	iTRAQ 4plex (K N-term)	44106	Keratin type I cytoskeletal 19 OS=Homo sapiens GN=KRT19 PE=1 SV=4
sp|Q03468|ERCC6_HUMAN	22.26	1	1	1	iTRAQ 4plex (K N-term)	168415	DNA excision repair protein ERCC-6 OS=Homo sapiens GN=ERCC6 PE=1 SV=1
sp|O14974|MYPT1_HUMAN	22.1	2	1	1	iTRAQ 4plex (K N-term)	115281	Protein phosphatase 1 regulatory subunit 12A OS=Homo sapiens GN=PPP1R12A PE=1 SV=1
tr|F8VZN8|F8VZN8_HUMAN	22.1	3	1	1	iTRAQ 4plex (K N-term)	76533	Protein phosphatase 1 regulatory subunit 12A (Fragment) OS=Homo sapiens GN=PPP1R12A PE=1 SV=1
sp|Q9H074|PAIP1_HUMAN	22.08	2	1	1	Carbamidomethylation; iTRAQ 4plex (K N-term)	53525	Polyadenylate-binding protein-interacting protein 1 OS=Homo sapiens GN=PAIP1 PE=1 SV=1
sp|O43852|CALU_HUMAN	21.89	9	1	1	iTRAQ 4plex (K N-term); iTRAQ 4plex (Y)	37107	Calumenin OS=Homo sapiens GN=CALU PE=1 SV=2
tr|H0Y875|H0Y875_HUMAN	21.89	18	1	1	iTRAQ 4plex (K N-term); iTRAQ 4plex (Y)	17379	Calumenin (Fragment) OS=Homo sapiens GN=CALU PE=1 SV=1
sp|Q07869|PPARA_HUMAN	21.86	1	1	1	Pyro-glu from E; iTRAQ 4plex (K N-term)	52225	Peroxisome proliferator-activated receptor alpha OS=Homo sapiens GN=PPARA PE=1 SV=2
tr|A0A087X0I0|A0A087X0I0_HUMAN	21.84	0	1	1	iTRAQ 4plex (K N-term)	213076	Tenascin-X OS=Homo sapiens GN=TNXB PE=1 SV=1
sp|P22105|TENX_HUMAN	21.84	0	1	1	iTRAQ 4plex (K N-term)	458224	Tenascin-X OS=Homo sapiens GN=TNXB PE=1 SV=4
tr|A0A140TA33|A0A140TA33_HUMAN	21.84	0	1	1	iTRAQ 4plex (K N-term)	458281	Tenascin-X OS=Homo sapiens GN=TNXB PE=1 SV=1
tr|E7EPZ9|E7EPZ9_HUMAN	21.84	0	1	1	iTRAQ 4plex (K N-term)	458392	Tenascin-X OS=Homo sapiens GN=TNXB PE=1 SV=1
sp|Q8N1G2|CMTR1_HUMAN	21.81	2	1	1	Deamidation (NQ); iTRAQ 4plex (K N-term)	95321	Cap-specific mRNA (nucleoside-2'-O-)-methyltransferase 1 OS=Homo sapiens GN=CMTR1 PE=1 SV=1
sp|P15121|ALDR_HUMAN	21.78	3	1	1	iTRAQ 4plex (K N-term)	35853	Aldose reductase OS=Homo sapiens GN=AKR1B1 PE=1 SV=3
tr|A0A096LNH0|A0A096LNH0_HUMAN	21.77	0	1	1	iTRAQ 4plex (K N-term)	322221	Protocadherin-23 (Fragment) OS=Homo sapiens GN=DCHS2 PE=1 SV=1
sp|Q8TCS8|PNPT1_HUMAN	21.74	1	1	1	iTRAQ 4plex (K N-term)	85951	Polyribonucleotide nucleotidyltransferase 1 mitochondrial OS=Homo sapiens GN=PNPT1 PE=1 SV=2

## Sheet: Rep_1_all_peps
Protein Accession	Peptide	Unique	-10lgP	Mass	ppm	m/z	z	RT	Scan	#Spec	Start	End	PTM
sp|P60709|ACTB_HUMAN	R.T(+144.10)TGIVMDSGDGVTHTVPIYEGYALPHAILR.L	Y	91.69	3326.71	-14.1	832.672	4	147.87	81972	10	148	177	iTRAQ 4plex (K N-term)
sp|P60709|ACTB_HUMAN	K.D(+144.10)LYANTVLSGGTTMYPGIADR.M	Y	89.22	2358.16	-9.7	787.054	3	125.12	70642	14	292	312	iTRAQ 4plex (K N-term)
sp|P60709|ACTB_HUMAN	K.L(+144.10)C(+57.02)YVALDFEQEMATAASSSSLEK(+144.10).S	N	88.37	2837.37	-7.8	710.343	4	169.16	92480	8	216	238	iTRAQ 4plex (K N-term); Carbamidomethylation
sp|P60709|ACTB_HUMAN	R.V(+144.10)APEEHPVLLTEAPLNPK(+144.10).A	Y	82.59	2241.26	-8.8	748.086	3	110.8	63513	22	96	113	iTRAQ 4plex (K N-term)
sp|P60709|ACTB_HUMAN	K.D(+144.10)LYANTVLSGGTTMY(+144.10)PGIADR.M	Y	79.2	2502.26	-0.1	626.573	4	115.46	65824	4	292	312	iTRAQ 4plex (K N-term); iTRAQ 4plex (Y)
sp|P60709|ACTB_HUMAN	K.S(+144.10)YELPDGQVITIGNER.F	N	78.43	1933.98	-1.3	645.668	3	115.06	65625	21	239	254	iTRAQ 4plex (K N-term)
sp|P60709|ACTB_HUMAN	K.S(+144.10)Y(+144.10)ELPDGQVITIGNER.F	N	78.18	2078.08	-6	693.698	3	100.27	58310	8	239	254	iTRAQ 4plex (K N-term); iTRAQ 4plex (Y)
sp|P60709|ACTB_HUMAN	K.Q(+144.10)EYDESGPSIVHR.K	N	74.37	1659.8	0.1	554.273	3	47.22	32085	10	360	372	iTRAQ 4plex (K N-term)
sp|P60709|ACTB_HUMAN	R.HQGVMVGMGQK(+144.10).D	N	74.32	1314.66	-10.3	658.332	2	43.29	30151	10	40	50	iTRAQ 4plex (K N-term)
sp|P60709|ACTB_HUMAN	R.K(+144.10)DLY(+144.10)ANTVLSGGTTMYPGIADR.M	Y	70.11	2630.36	-5.4	658.593	4	115.49	65835	2	291	312	iTRAQ 4plex (K N-term); iTRAQ 4plex (Y)
sp|P60709|ACTB_HUMAN	R.H(+144.10)QGVMVGMGQK(+144.10).D	N	70.04	1458.76	8.7	487.266	3	45.29	31137	18	40	50	iTRAQ 4plex (K N-term)
sp|P60709|ACTB_HUMAN	R.G(+144.10)YSFTTTAER.E	Y	66.97	1275.62	-6.2	638.813	2	48.79	32856	20	197	206	iTRAQ 4plex (K N-term)
sp|P60709|ACTB_HUMAN	R.A(+144.10)VFPSIVGRPR.H	N	66.69	1341.8	19.5	448.282	3	88.64	52561	26	29	39	iTRAQ 4plex (K N-term)
sp|P60709|ACTB_HUMAN	K.A(+144.10)GFAGDDAPR.A	N	66.12	1119.54	-3.3	560.776	2	33.09	25122	20	19	28	iTRAQ 4plex (K N-term)
sp|P60709|ACTB_HUMAN	K.E(+144.10)ITALAPSTMK(+144.10).I	N	63.77	1448.81	-6	725.409	2	85.52	51027	24	316	326	iTRAQ 4plex (K N-term)
sp|P60709|ACTB_HUMAN	K.Q(-17.03)EYDESGPSIVHR.K	N	62.86	1498.67	-14.3	750.331	2	56.47	36652	2	360	372	Pyro-glu from Q
sp|P60709|ACTB_HUMAN	R.H(+144.10)QGVMVGM(+15.99)GQK(+144.10).D	N	56.4	1474.76	4.9	492.596	3	28.02	22627	10	40	50	iTRAQ 4plex (K N-term); Oxidation (M)
sp|P60709|ACTB_HUMAN	K.I(+144.10)WHHTFYNELR.V	N	56.3	1658.84	-19.2	830.412	2	80.53	48554	14	85	95	iTRAQ 4plex (K N-term)
sp|P60709|ACTB_HUMAN	K.D(+144.10)SYVGDEAQSK(+144.10).R	N	55.37	1485.71	5.9	496.248	3	31.09	24134	12	51	61	iTRAQ 4plex (K N-term)
sp|P60709|ACTB_HUMAN	R.G(+144.10)Y(+144.10)SFTTTAER.E	Y	52.09	1419.72	8.7	474.251	3	44.28	30634	14	197	206	iTRAQ 4plex (K N-term); iTRAQ 4plex (Y)
sp|P60709|ACTB_HUMAN	R.D(+144.10)LTDYLMK(+144.10).I	N	51.64	1285.68	0.3	643.847	2	98.49	57440	20	184	191	iTRAQ 4plex (K N-term)
sp|P60709|ACTB_HUMAN	R.H(+144.10)QGVM(+15.99)VGMGQK(+144.10).D	N	51.11	1474.76	8	492.597	3	36.12	26620	7	40	50	iTRAQ 4plex (K N-term); Oxidation (M)
sp|P60709|ACTB_HUMAN	R.A(+144.10)VFPSIVGR.P	N	46.22	1088.64	7.9	545.334	2	94.64	55532	23	29	37	iTRAQ 4plex (K N-term)
sp|P60709|ACTB_HUMAN	K.E(+144.10)ITALAPSTM(+15.99)K(+144.10).I	N	44.73	1464.81	16	489.284	3	69.95	43313	3	316	326	iTRAQ 4plex (K N-term); Oxidation (M)
sp|P60709|ACTB_HUMAN	K.IWHHTFYNELR.V	N	42.7	1514.74	-15.2	758.367	2	67.58	42130	2	85	95
sp|P60709|ACTB_HUMAN	K.I(+144.10)WHHTFY(+144.10)NELR.V	N	34.98	1802.94	-19.1	902.461	2	71.24	43956	11	85	95	iTRAQ 4plex (K N-term); iTRAQ 4plex (Y)
sp|P60709|ACTB_HUMAN	R.D(+144.10)LTDY(+144.10)LMK(+144.10).I	N	34.75	1429.78	14.8	477.607	3	86.49	51505	6	184	191	iTRAQ 4plex (K N-term); iTRAQ 4plex (Y)
sp|P60709|ACTB_HUMAN	K.I(+144.10)IAPPER.K	N	34.74	938.565	12.4	470.296	2	53.56	35215	25	329	335	iTRAQ 4plex (K N-term)
sp|P60709|ACTB_HUMAN	Y.A(+144.10)LPHAILR.L	Y	32.66	1033.65	8.1	517.836	2	66.02	41358	10	170	177	iTRAQ 4plex (K N-term)
sp|P60709|ACTB_HUMAN	R.D(+144.10)LTDYLM(+15.99)K(+144.10).I	N	30.2	1301.67	-2.7	651.842	2	85.6	51068	11	184	191	iTRAQ 4plex (K N-term); Oxidation (M)
sp|P60709|ACTB_HUMAN	K.I(+144.10)IAPPERK(+144.10).Y	N	28.74	1210.76	21.1	404.603	3	51.37	34127	17	329	336	iTRAQ 4plex (K N-term)
sp|P60709|ACTB_HUMAN	K.IIAPPER.K	N	28.05	794.465	11.2	398.244	2	36.89	27009	1	329	335
sp|P60709|ACTB_HUMAN	R.L(+144.10)DLAGR.D	N	26.11	787.465	21.9	394.749	2	43.95	30473	21	178	183	iTRAQ 4plex (K N-term)
sp|P60709|ACTB_HUMAN	F.PSIVGRPR.H	N	24.74	880.524	19.4	441.278	2	88.75	52615	4	32	39
sp|P60709|ACTB_HUMAN	K.R(+144.10)GILTLK(+144.10).Y	N	24.63	1087.73	4.1	544.874	2	63.71	40222	18	62	68	iTRAQ 4plex (K N-term)
sp|P60709|ACTB_HUMAN	R.G(+144.10)ILTLK(+144.10).Y	N	22.17	931.627	17.3	466.829	2	77.09	46854	31	63	68	iTRAQ 4plex (K N-term)
sp|P63261|ACTG_HUMAN	R.T(+144.10)TGIVMDSGDGVTHTVPIYEGYALPHAILR.L	Y	91.69	3326.71	-14.1	832.672	4	147.87	81972	10	148	177	iTRAQ 4plex (K N-term)
sp|P63261|ACTG_HUMAN	K.D(+144.10)LYANTVLSGGTTMYPGIADR.M	Y	89.22	2358.16	-9.7	787.054	3	125.12	70642	14	292	312	iTRAQ 4plex (K N-term)
sp|P63261|ACTG_HUMAN	K.L(+144.10)C(+57.02)YVALDFEQEMATAASSSSLEK(+144.10).S	N	88.37	2837.37	-7.8	710.343	4	169.16	92480	8	216	238	iTRAQ 4plex (K N-term); Carbamidomethylation
sp|P63261|ACTG_HUMAN	R.V(+144.10)APEEHPVLLTEAPLNPK(+144.10).A	Y	82.59	2241.26	-8.8	748.086	3	110.8	63513	22	96	113	iTRAQ 4plex (K N-term)
sp|P63261|ACTG_HUMAN	K.D(+144.10)LYANTVLSGGTTMY(+144.10)PGIADR.M	Y	79.2	2502.26	-0.1	626.573	4	115.46	65824	4	292	312	iTRAQ 4plex (K N-term); iTRAQ 4plex (Y)
sp|P63261|ACTG_HUMAN	K.S(+144.10)YELPDGQVITIGNER.F	N	78.43	1933.98	-1.3	645.668	3	115.06	65625	21	239	254	iTRAQ 4plex (K N-term)
sp|P63261|ACTG_HUMAN	K.S(+144.10)Y(+144.10)ELPDGQVITIGNER.F	N	78.18	2078.08	-6	693.698	3	100.27	58310	8	239	254	iTRAQ 4plex (K N-term); iTRAQ 4plex (Y)
sp|P63261|ACTG_HUMAN	K.Q(+144.10)EYDESGPSIVHR.K	N	74.37	1659.8	0.1	554.273	3	47.22	32085	10	360	372	iTRAQ 4plex (K N-term)
sp|P63261|ACTG_HUMAN	R.HQGVMVGMGQK(+144.10).D	N	74.32	1314.66	-10.3	658.332	2	43.29	30151	10	40	50	iTRAQ 4plex (K N-term)
sp|P63261|ACTG_HUMAN	R.K(+144.10)DLY(+144.10)ANTVLSGGTTMYPGIADR.M	Y	70.11	2630.36	-5.4	658.593	4	115.49	65835	2	291	312	iTRAQ 4plex (K N-term); iTRAQ 4plex (Y)
sp|P63261|ACTG_HUMAN	R.H(+144.10)QGVMVGMGQK(+144.10).D	N	70.04	1458.76	8.7	487.266	3	45.29	31137	18	40	50	iTRAQ 4plex (K N-term)
sp|P63261|ACTG_HUMAN	R.G(+144.10)YSFTTTAER.E	Y	66.97	1275.62	-6.2	638.813	2	48.79	32856	20	197	206	iTRAQ 4plex (K N-term)
sp|P63261|ACTG_HUMAN	R.A(+144.10)VFPSIVGRPR.H	N	66.69	1341.8	19.5	448.282	3	88.64	52561	26	29	39	iTRAQ 4plex (K N-term)
sp|P63261|ACTG_HUMAN	K.A(+144.10)GFAGDDAPR.A	N	66.12	1119.54	-3.3	560.776	2	33.09	25122	20	19	28	iTRAQ 4plex (K N-term)
sp|P63261|ACTG_HUMAN	K.E(+144.10)ITALAPSTMK(+144.10).I	N	63.77	1448.81	-6	725.409	2	85.52	51027	24	316	326	iTRAQ 4plex (K N-term)
sp|P63261|ACTG_HUMAN	K.Q(-17.03)EYDESGPSIVHR.K	N	62.86	1498.67	-14.3	750.331	2	56.47	36652	2	360	372	Pyro-glu from Q
sp|P63261|ACTG_HUMAN	R.H(+144.10)QGVMVGM(+15.99)GQK(+144.10).D	N	56.4	1474.76	4.9	492.596	3	28.02	22627	10	40	50	iTRAQ 4plex (K N-term); Oxidation (M)
sp|P63261|ACTG_HUMAN	K.I(+144.10)WHHTFYNELR.V	N	56.3	1658.84	-19.2	830.412	2	80.53	48554	14	85	95	iTRAQ 4plex (K N-term)
sp|P63261|ACTG_HUMAN	K.D(+144.10)SYVGDEAQSK(+144.10).R	N	55.37	1485.71	5.9	496.248	3	31.09	24134	12	51	61	iTRAQ 4plex (K N-term)
sp|P63261|ACTG_HUMAN	R.G(+144.10)Y(+144.10)SFTTTAER.E	Y	52.09	1419.72	8.7	474.251	3	44.28	30634	14	197	206	iTRAQ 4plex (K N-term); iTRAQ 4plex (Y)
sp|P63261|ACTG_HUMAN	R.D(+144.10)LTDYLMK(+144.10).I	N	51.64	1285.68	0.3	643.847	2	98.49	57440	20	184	191	iTRAQ 4plex (K N-term)
sp|P63261|ACTG_HUMAN	R.H(+144.10)QGVM(+15.99)VGMGQK(+144.10).D	N	51.11	1474.76	8	492.597	3	36.12	26620	7	40	50	iTRAQ 4plex (K N-term); Oxidation (M)
sp|P63261|ACTG_HUMAN	R.A(+144.10)VFPSIVGR.P	N	46.22	1088.64	7.9	545.334	2	94.64	55532	23	29	37	iTRAQ 4plex (K N-term)
sp|P63261|ACTG_HUMAN	K.E(+144.10)ITALAPSTM(+15.99)K(+144.10).I	N	44.73	1464.81	16	489.284	3	69.95	43313	3	316	326	iTRAQ 4plex (K N-term); Oxidation (M)
sp|P63261|ACTG_HUMAN	K.IWHHTFYNELR.V	N	42.7	1514.74	-15.2	758.367	2	67.58	42130	2	85	95
sp|P63261|ACTG_HUMAN	K.I(+144.10)WHHTFY(+144.10)NELR.V	N	34.98	1802.94	-19.1	902.461	2	71.24	43956	11	85	95	iTRAQ 4plex (K N-term); iTRAQ 4plex (Y)
sp|P63261|ACTG_HUMAN	R.D(+144.10)LTDY(+144.10)LMK(+144.10).I	N	34.75	1429.78	14.8	477.607	3	86.49	51505	6	184	191	iTRAQ 4plex (K N-term); iTRAQ 4plex (Y)
sp|P63261|ACTG_HUMAN	K.I(+144.10)IAPPER.K	N	34.74	938.565	12.4	470.296	2	53.56	35215	25	329	335	iTRAQ 4plex (K N-term)
sp|P63261|ACTG_HUMAN	Y.A(+144.10)LPHAILR.L	Y	32.66	1033.65	8.1	517.836	2	66.02	41358	10	170	177	iTRAQ 4plex (K N-term)
sp|P63261|ACTG_HUMAN	R.D(+144.10)LTDYLM(+15.99)K(+144.10).I	N	30.2	1301.67	-2.7	651.842	2	85.6	51068	11	184	191	iTRAQ 4plex (K N-term); Oxidation (M)
sp|P63261|ACTG_HUMAN	K.I(+144.10)IAPPERK(+144.10).Y	N	28.74	1210.76	21.1	404.603	3	51.37	34127	17	329	336	iTRAQ 4plex (K N-term)
sp|P63261|ACTG_HUMAN	K.IIAPPER.K	N	28.05	794.465	11.2	398.244	2	36.89	27009	1	329	335
sp|P63261|ACTG_HUMAN	R.L(+144.10)DLAGR.D	N	26.11	787.465	21.9	394.749	2	43.95	30473	21	178	183	iTRAQ 4plex (K N-term)
sp|P63261|ACTG_HUMAN	F.PSIVGRPR.H	N	24.74	880.524	19.4	441.278	2	88.75	52615	4	32	39
sp|P63261|ACTG_HUMAN	K.R(+144.10)GILTLK(+144.10).Y	N	24.63	1087.73	4.1	544.874	2	63.71	40222	18	62	68	iTRAQ 4plex (K N-term)
sp|P63261|ACTG_HUMAN	R.G(+144.10)ILTLK(+144.10).Y	N	22.17	931.627	17.3	466.829	2	77.09	46854	31	63	68	iTRAQ 4plex (K N-term)
tr|I3L4N8|I3L4N8_HUMAN	R.T(+144.10)TGIVMDSGDGVTHTVPIYEGYALPHAILR.L	Y	91.69	3326.71	-14.1	832.672	4	147.87	81972	10	139	168	iTRAQ 4plex (K N-term)
tr|I3L4N8|I3L4N8_HUMAN	K.L(+144.10)C(+57.02)YVALDFEQEMATAASSSSLEK(+144.10).S	N	88.37	2837.37	-7.8	710.343	4	169.16	92480	8	207	229	iTRAQ 4plex (K N-term); Carbamidomethylation
tr|I3L4N8|I3L4N8_HUMAN	R.V(+144.10)APEEHPVLLTEAPLNPK(+144.10).A	Y	82.59	2241.26	-8.8	748.086	3	110.8	63513	22	87	104	iTRAQ 4plex (K N-term)
tr|I3L4N8|I3L4N8_HUMAN	R.G(+144.10)YSFTTTAER.E	Y	66.97	1275.62	-6.2	638.813	2	48.79	32856	20	188	197	iTRAQ 4plex (K N-term)
tr|I3L4N8|I3L4N8_HUMAN	R.A(+144.10)VFPSIVGRPR.H	N	66.69	1341.8	19.5	448.282	3	88.64	52561	26	29	39	iTRAQ 4plex (K N-term)
tr|I3L4N8|I3L4N8_HUMAN	K.A(+144.10)GFAGDDAPR.A	N	66.12	1119.54	-3.3	560.776	2	33.09	25122	20	19	28	iTRAQ 4plex (K N-term)
tr|I3L4N8|I3L4N8_HUMAN	K.I(+144.10)WHHTFYNELR.V	N	56.3	1658.84	-19.2	830.412	2	80.53	48554	14	76	86	iTRAQ 4plex (K N-term)
tr|I3L4N8|I3L4N8_HUMAN	Q.D(+144.10)SYVGDEAQSK(+144.10).R	N	55.37	1485.71	5.9	496.248	3	31.09	24134	12	42	52	iTRAQ 4plex (K N-term)
tr|I3L4N8|I3L4N8_HUMAN	R.G(+144.10)Y(+144.10)SFTTTAER.E	Y	52.09	1419.72	8.7	474.251	3	44.28	30634	14	188	197	iTRAQ 4plex (K N-term); iTRAQ 4plex (Y)
tr|I3L4N8|I3L4N8_HUMAN	R.D(+144.10)LTDYLMK(+144.10).I	N	51.64	1285.68	0.3	643.847	2	98.49	57440	20	175	182	iTRAQ 4plex (K N-term)
tr|I3L4N8|I3L4N8_HUMAN	R.A(+144.10)VFPSIVGR.P	N	46.22	1088.64	7.9	545.334	2	94.64	55532	23	29	37	iTRAQ 4plex (K N-term)
tr|I3L4N8|I3L4N8_HUMAN	K.IWHHTFYNELR.V	N	42.7	1514.74	-15.2	758.367	2	67.58	42130	2	76	86
tr|I3L4N8|I3L4N8_HUMAN	K.I(+144.10)WHHTFY(+144.10)NELR.V	N	34.98	1802.94	-19.1	902.461	2	71.24	43956	11	76	86	iTRAQ 4plex (K N-term); iTRAQ 4plex (Y)
tr|I3L4N8|I3L4N8_HUMAN	R.D(+144.10)LTDY(+144.10)LMK(+144.10).I	N	34.75	1429.78	14.8	477.607	3	86.49	51505	6	175	182	iTRAQ 4plex (K N-term); iTRAQ 4plex (Y)
tr|I3L4N8|I3L4N8_HUMAN	Y.A(+144.10)LPHAILR.L	Y	32.66	1033.65	8.1	517.836	2	66.02	41358	10	161	168	iTRAQ 4plex (K N-term)
tr|I3L4N8|I3L4N8_HUMAN	R.D(+144.10)LTDYLM(+15.99)K(+144.10).I	N	30.2	1301.67	-2.7	651.842	2	85.6	51068	11	175	182	iTRAQ 4plex (K N-term); Oxidation (M)
tr|I3L4N8|I3L4N8_HUMAN	R.L(+144.10)DLAGR.D	N	26.11	787.465	21.9	394.749	2	43.95	30473	21	169	174	iTRAQ 4plex (K N-term)
tr|I3L4N8|I3L4N8_HUMAN	F.PSIVGRPR.H	N	24.74	880.524	19.4	441.278	2	88.75	52615	4	32	39
tr|I3L4N8|I3L4N8_HUMAN	K.R(+144.10)GILTLK(+144.10).Y	N	24.63	1087.73	4.1	544.874	2	63.71	40222	18	53	59	iTRAQ 4plex (K N-term)
tr|I3L4N8|I3L4N8_HUMAN	R.G(+144.10)ILTLK(+144.10).Y	N	22.17	931.627	17.3	466.829	2	77.09	46854	31	54	59	iTRAQ 4plex (K N-term)
tr|I3L3I0|I3L3I0_HUMAN	R.T(+144.10)TGIVMDSGDGVTHTVPIYEGYALPHAILR.L	Y	91.69	3326.71	-14.1	832.672	4	147.87	81972	10	148	177	iTRAQ 4plex (K N-term)
tr|I3L3I0|I3L3I0_HUMAN	R.V(+144.10)APEEHPVLLTEAPLNPK(+144.10).A	Y	82.59	2241.26	-8.8	748.086	3	110.8	63513	22	96	113	iTRAQ 4plex (K N-term)
tr|I3L3I0|I3L3I0_HUMAN	R.HQGVMVGMGQK(+144.10).D	N	74.32	1314.66	-10.3	658.332	2	43.29	30151	10	40	50	iTRAQ 4plex (K N-term)
tr|I3L3I0|I3L3I0_HUMAN	R.H(+144.10)QGVMVGMGQK(+144.10).D	N	70.04	1458.76	8.7	487.266	3	45.29	31137	18	40	50	iTRAQ 4plex (K N-term)
tr|I3L3I0|I3L3I0_HUMAN	R.G(+144.10)YSFTTTAER.E	Y	66.97	1275.62	-6.2	638.813	2	48.79	32856	20	197	206	iTRAQ 4plex (K N-term)
tr|I3L3I0|I3L3I0_HUMAN	R.A(+144.10)VFPSIVGRPR.H	N	66.69	1341.8	19.5	448.282	3	88.64	52561	26	29	39	iTRAQ 4plex (K N-term)
tr|I3L3I0|I3L3I0_HUMAN	K.A(+144.10)GFAGDDAPR.A	N	66.12	1119.54	-3.3	560.776	2	33.09	25122	20	19	28	iTRAQ 4plex (K N-term)
tr|I3L3I0|I3L3I0_HUMAN	R.H(+144.10)QGVMVGM(+15.99)GQK(+144.10).D	N	56.4	1474.76	4.9	492.596	3	28.02	22627	10	40	50	iTRAQ 4plex (K N-term); Oxidation (M)
tr|I3L3I0|I3L3I0_HUMAN	K.I(+144.10)WHHTFYNELR.V	N	56.3	1658.84	-19.2	830.412	2	80.53	48554	14	85	95	iTRAQ 4plex (K N-term)
tr|I3L3I0|I3L3I0_HUMAN	K.D(+144.10)SYVGDEAQSK(+144.10).R	N	55.37	1485.71	5.9	496.248	3	31.09	24134	12	51	61	iTRAQ 4plex (K N-term)
tr|I3L3I0|I3L3I0_HUMAN	R.G(+144.10)Y(+144.10)SFTTTAER.E	Y	52.09	1419.72	8.7	474.251	3	44.28	30634	14	197	206	iTRAQ 4plex (K N-term); iTRAQ 4plex (Y)
tr|I3L3I0|I3L3I0_HUMAN	R.D(+144.10)LTDYLMK(+144.10).I	N	51.64	1285.68	0.3	643.847	2	98.49	57440	20	184	191	iTRAQ 4plex (K N-term)
tr|I3L3I0|I3L3I0_HUMAN	R.H(+144.10)QGVM(+15.99)VGMGQK(+144.10).D	N	51.11	1474.76	8	492.597	3	36.12	26620	7	40	50	iTRAQ 4plex (K N-term); Oxidation (M)
tr|I3L3I0|I3L3I0_HUMAN	R.A(+144.10)VFPSIVGR.P	N	46.22	1088.64	7.9	545.334	2	94.64	55532	23	29	37	iTRAQ 4plex (K N-term)
tr|I3L3I0|I3L3I0_HUMAN	K.IWHHTFYNELR.V	N	42.7	1514.74	-15.2	758.367	2	67.58	42130	2	85	95
tr|I3L3I0|I3L3I0_HUMAN	K.I(+144.10)WHHTFY(+144.10)NELR.V	N	34.98	1802.94	-19.1	902.461	2	71.24	43956	11	85	95	iTRAQ 4plex (K N-term); iTRAQ 4plex (Y)
tr|I3L3I0|I3L3I0_HUMAN	R.D(+144.10)LTDY(+144.10)LMK(+144.10).I	N	34.75	1429.78	14.8	477.607	3	86.49	51505	6	184	191	iTRAQ 4plex (K N-term); iTRAQ 4plex (Y)
tr|I3L3I0|I3L3I0_HUMAN	Y.A(+144.10)LPHAILR.L	Y	32.66	1033.65	8.1	517.836	2	66.02	41358	10	170	177	iTRAQ 4plex (K N-term)
tr|I3L3I0|I3L3I0_HUMAN	R.D(+144.10)LTDYLM(+15.99)K(+144.10).I	N	30.2	1301.67	-2.7	651.842	2	85.6	51068	11	184	191	iTRAQ 4plex (K N-term); Oxidation (M)
tr|I3L3I0|I3L3I0_HUMAN	R.L(+144.10)DLAGR.D	N	26.11	787.465	21.9	394.749	2	43.95	30473	21	178	183	iTRAQ 4plex (K N-term)
tr|I3L3I0|I3L3I0_HUMAN	F.PSIVGRPR.H	N	24.74	880.524	19.4	441.278	2	88.75	52615	4	32	39
tr|I3L3I0|I3L3I0_HUMAN	K.R(+144.10)GILTLK(+144.10).Y	N	24.63	1087.73	4.1	544.874	2	63.71	40222	18	62	68	iTRAQ 4plex (K N-term)
tr|I3L3I0|I3L3I0_HUMAN	R.G(+144.10)ILTLK(+144.10).Y	N	22.17	931.627	17.3	466.829	2	77.09	46854	31	63	68	iTRAQ 4plex (K N-term)
tr|I3L1U9|I3L1U9_HUMAN	R.T(+144.10)TGIVMDSGDGVTHTVPIYEGYALPHAILR.L	Y	91.69	3326.71	-14.1	832.672	4	147.87	81972	10	148	177	iTRAQ 4plex (K N-term)
tr|I3L1U9|I3L1U9_HUMAN	R.V(+144.10)APEEHPVLLTEAPLNPK(+144.10).A	Y	82.59	2241.26	-8.8	748.086	3	110.8	63513	22	96	113	iTRAQ 4plex (K N-term)
tr|I3L1U9|I3L1U9_HUMAN	R.HQGVMVGMGQK(+144.10).D	N	74.32	1314.66	-10.3	658.332	2	43.29	30151	10	40	50	iTRAQ 4plex (K N-term)
tr|I3L1U9|I3L1U9_HUMAN	R.H(+144.10)QGVMVGMGQK(+144.10).D	N	70.04	1458.76	8.7	487.266	3	45.29	31137	18	40	50	iTRAQ 4plex (K N-term)
tr|I3L1U9|I3L1U9_HUMAN	R.G(+144.10)YSFTTTAER.E	Y	66.97	1275.62	-6.2	638.813	2	48.79	32856	20	197	206	iTRAQ 4plex (K N-term)
tr|I3L1U9|I3L1U9_HUMAN	R.A(+144.10)VFPSIVGRPR.H	N	66.69	1341.8	19.5	448.282	3	88.64	52561	26	29	39	iTRAQ 4plex (K N-term)
tr|I3L1U9|I3L1U9_HUMAN	K.A(+144.10)GFAGDDAPR.A	N	66.12	1119.54	-3.3	560.776	2	33.09	25122	20	19	28	iTRAQ 4plex (K N-term)
tr|I3L1U9|I3L1U9_HUMAN	R.H(+144.10)QGVMVGM(+15.99)GQK(+144.10).D	N	56.4	1474.76	4.9	492.596	3	28.02	22627	10	40	50	iTRAQ 4plex (K N-term); Oxidation (M)
tr|I3L1U9|I3L1U9_HUMAN	K.I(+144.10)WHHTFYNELR.V	N	56.3	1658.84	-19.2	830.412	2	80.53	48554	14	85	95	iTRAQ 4plex (K N-term)
tr|I3L1U9|I3L1U9_HUMAN	K.D(+144.10)SYVGDEAQSK(+144.10).R	N	55.37	1485.71	5.9	496.248	3	31.09	24134	12	51	61	iTRAQ 4plex (K N-term)
tr|I3L1U9|I3L1U9_HUMAN	R.G(+144.10)Y(+144.10)SFTTTAER.E	Y	52.09	1419.72	8.7	474.251	3	44.28	30634	14	197	206	iTRAQ 4plex (K N-term); iTRAQ 4plex (Y)
tr|I3L1U9|I3L1U9_HUMAN	R.D(+144.10)LTDYLMK(+144.10).I	N	51.64	1285.68	0.3	643.847	2	98.49	57440	20	184	191	iTRAQ 4plex (K N-term)
tr|I3L1U9|I3L1U9_HUMAN	R.H(+144.10)QGVM(+15.99)VGMGQK(+144.10).D	N	51.11	1474.76	8	492.597	3	36.12	26620	7	40	50	iTRAQ 4plex (K N-term); Oxidation (M)
tr|I3L1U9|I3L1U9_HUMAN	R.A(+144.10)VFPSIVGR.P	N	46.22	1088.64	7.9	545.334	2	94.64	55532	23	29	37	iTRAQ 4plex (K N-term)
tr|I3L1U9|I3L1U9_HUMAN	K.IWHHTFYNELR.V	N	42.7	1514.74	-15.2	758.367	2	67.58	42130	2	85	95
tr|I3L1U9|I3L1U9_HUMAN	K.I(+144.10)WHHTFY(+144.10)NELR.V	N	34.98	1802.94	-19.1	902.461	2	71.24	43956	11	85	95	iTRAQ 4plex (K N-term); iTRAQ 4plex (Y)
tr|I3L1U9|I3L1U9_HUMAN	R.D(+144.10)LTDY(+144.10)LMK(+144.10).I	N	34.75	1429.78	14.8	477.607	3	86.49	51505	6	184	191	iTRAQ 4plex (K N-term); iTRAQ 4plex (Y)
tr|I3L1U9|I3L1U9_HUMAN	Y.A(+144.10)LPHAILR.L	Y	32.66	1033.65	8.1	517.836	2	66.02	41358	10	170	177	iTRAQ 4plex (K N-term)
tr|I3L1U9|I3L1U9_HUMAN	R.D(+144.10)LTDYLM(+15.99)K(+144.10).I	N	30.2	1301.67	-2.7	651.842	2	85.6	51068	11	184	191	iTRAQ 4plex (K N-term); Oxidation (M)
tr|I3L1U9|I3L1U9_HUMAN	R.L(+144.10)DLAGR.D	N	26.11	787.465	21.9	394.749	2	43.95	30473	21	178	183	iTRAQ 4plex (K N-term)
tr|I3L1U9|I3L1U9_HUMAN	F.PSIVGRPR.H	N	24.74	880.524	19.4	441.278	2	88.75	52615	4	32	39
tr|I3L1U9|I3L1U9_HUMAN	K.R(+144.10)GILTLK(+144.10).Y	N	24.63	1087.73	4.1	544.874	2	63.71	40222	18	62	68	iTRAQ 4plex (K N-term)
tr|I3L1U9|I3L1U9_HUMAN	R.G(+144.10)ILTLK(+144.10).Y	N	22.17	931.627	17.3	466.829	2	77.09	46854	31	63	68	iTRAQ 4plex (K N-term)
tr|I3L3R2|I3L3R2_HUMAN	R.V(+144.10)APEEHPVLLTEAPLNPK(+144.10).A	Y	82.59	2241.26	-8.8	748.086	3	110.8	63513	22	96	113	iTRAQ 4plex (K N-term)
tr|I3L3R2|I3L3R2_HUMAN	R.HQGVMVGMGQK(+144.10).D	N	74.32	1314.66	-10.3	658.332	2	43.29	30151	10	40	50	iTRAQ 4plex (K N-term)
tr|I3L3R2|I3L3R2_HUMAN	R.H(+144.10)QGVMVGMGQK(+144.10).D	N	70.04	1458.76	8.7	487.266	3	45.29	31137	18	40	50	iTRAQ 4plex (K N-term)
tr|I3L3R2|I3L3R2_HUMAN	R.A(+144.10)VFPSIVGRPR.H	N	66.69	1341.8	19.5	448.282	3	88.64	52561	26	29	39	iTRAQ 4plex (K N-term)
tr|I3L3R2|I3L3R2_HUMAN	K.A(+144.10)GFAGDDAPR.A	N	66.12	1119.54	-3.3	560.776	2	33.09	25122	20	19	28	iTRAQ 4plex (K N-term)
tr|I3L3R2|I3L3R2_HUMAN	R.H(+144.10)QGVMVGM(+15.99)GQK(+144.10).D	N	56.4	1474.76	4.9	492.596	3	28.02	22627	10	40	50	iTRAQ 4plex (K N-term); Oxidation (M)
tr|I3L3R2|I3L3R2_HUMAN	K.I(+144.10)WHHTFYNELR.V	N	56.3	1658.84	-19.2	830.412	2	80.53	48554	14	85	95	iTRAQ 4plex (K N-term)
tr|I3L3R2|I3L3R2_HUMAN	K.D(+144.10)SYVGDEAQSK(+144.10).R	N	55.37	1485.71	5.9	496.248	3	31.09	24134	12	51	61	iTRAQ 4plex (K N-term)
tr|I3L3R2|I3L3R2_HUMAN	R.H(+144.10)QGVM(+15.99)VGMGQK(+144.10).D	N	51.11	1474.76	8	492.597	3	36.12	26620	7	40	50	iTRAQ 4plex (K N-term); Oxidation (M)
tr|I3L3R2|I3L3R2_HUMAN	R.A(+144.10)VFPSIVGR.P	N	46.22	1088.64	7.9	545.334	2	94.64	55532	23	29	37	iTRAQ 4plex (K N-term)
tr|I3L3R2|I3L3R2_HUMAN	K.IWHHTFYNELR.V	N	42.7	1514.74	-15.2	758.367	2	67.58	42130	2	85	95
tr|I3L3R2|I3L3R2_HUMAN	K.I(+144.10)WHHTFY(+144.10)NELR.V	N	34.98	1802.94	-19.1	902.461	2	71.24	43956	11	85	95	iTRAQ 4plex (K N-term); iTRAQ 4plex (Y)
tr|I3L3R2|I3L3R2_HUMAN	F.PSIVGRPR.H	N	24.74	880.524	19.4	441.278	2	88.75	52615	4	32	39
tr|I3L3R2|I3L3R2_HUMAN	K.R(+144.10)GILTLK(+144.10).Y	N	24.63	1087.73	4.1	544.874	2	63.71	40222	18	62	68	iTRAQ 4plex (K N-term)
tr|I3L3R2|I3L3R2_HUMAN	R.G(+144.10)ILTLK(+144.10).Y	N	22.17	931.627	17.3	466.829	2	77.09	46854	31	63	68	iTRAQ 4plex (K N-term)
tr|E7EVS6|E7EVS6_HUMAN	R.V(+144.10)APEEHPVLLTEAPLNPK(+144.10).A	Y	82.59	2241.26	-8.8	748.086	3	110.8	63513	22	96	113	iTRAQ 4plex (K N-term)
tr|E7EVS6|E7EVS6_HUMAN	R.HQGVMVGMGQK(+144.10).D	N	74.32	1314.66	-10.3	658.332	2	43.29	30151	10	40	50	iTRAQ 4plex (K N-term)
tr|E7EVS6|E7EVS6_HUMAN	R.H(+144.10)QGVMVGMGQK(+144.10).D	N	70.04	1458.76	8.7	487.266	3	45.29	31137	18	40	50	iTRAQ 4plex (K N-term)
tr|E7EVS6|E7EVS6_HUMAN	R.A(+144.10)VFPSIVGRPR.H	N	66.69	1341.8	19.5	448.282	3	88.64	52561	26	29	39	iTRAQ 4plex (K N-term)
tr|E7EVS6|E7EVS6_HUMAN	K.A(+144.10)GFAGDDAPR.A	N	66.12	1119.54	-3.3	560.776	2	33.09	25122	20	19	28	iTRAQ 4plex (K N-term)
tr|E7EVS6|E7EVS6_HUMAN	R.H(+144.10)QGVMVGM(+15.99)GQK(+144.10).D	N	56.4	1474.76	4.9	492.596	3	28.02	22627	10	40	50	iTRAQ 4plex (K N-term); Oxidation (M)
tr|E7EVS6|E7EVS6_HUMAN	K.I(+144.10)WHHTFYNELR.V	N	56.3	1658.84	-19.2	830.412	2	80.53	48554	14	85	95	iTRAQ 4plex (K N-term)
tr|E7EVS6|E7EVS6_HUMAN	K.D(+144.10)SYVGDEAQSK(+144.10).R	N	55.37	1485.71	5.9	496.248	3	31.09	24134	12	51	61	iTRAQ 4plex (K N-term)
tr|E7EVS6|E7EVS6_HUMAN	R.H(+144.10)QGVM(+15.99)VGMGQK(+144.10).D	N	51.11	1474.76	8	492.597	3	36.12	26620	7	40	50	iTRAQ 4plex (K N-term); Oxidation (M)
tr|E7EVS6|E7EVS6_HUMAN	R.A(+144.10)VFPSIVGR.P	N	46.22	1088.64	7.9	545.334	2	94.64	55532	23	29	37	iTRAQ 4plex (K N-term)
tr|E7EVS6|E7EVS6_HUMAN	K.IWHHTFYNELR.V	N	42.7	1514.74	-15.2	758.367	2	67.58	42130	2	85	95
tr|E7EVS6|E7EVS6_HUMAN	K.I(+144.10)WHHTFY(+144.10)NELR.V	N	34.98	1802.94	-19.1	902.461	2	71.24	43956	11	85	95	iTRAQ 4plex (K N-term); iTRAQ 4plex (Y)
tr|E7EVS6|E7EVS6_HUMAN	F.PSIVGRPR.H	N	24.74	880.524	19.4	441.278	2	88.75	52615	4	32	39
tr|E7EVS6|E7EVS6_HUMAN	K.R(+144.10)GILTLK(+144.10).Y	N	24.63	1087.73	4.1	544.874	2	63.71	40222	18	62	68	iTRAQ 4plex (K N-term)
tr|E7EVS6|E7EVS6_HUMAN	R.G(+144.10)ILTLK(+144.10).Y	N	22.17	931.627	17.3	466.829	2	77.09	46854	31	63	68	iTRAQ 4plex (K N-term)
tr|G5E9R0|G5E9R0_HUMAN	R.V(+144.10)APEEHPVLLTEAPLNPK(+144.10).A	Y	82.59	2241.26	-8.8	748.086	3	110.8	63513	22	96	113	iTRAQ 4plex (K N-term)
tr|G5E9R0|G5E9R0_HUMAN	R.HQGVMVGMGQK(+144.10).D	N	74.32	1314.66	-10.3	658.332	2	43.29	30151	10	40	50	iTRAQ 4plex (K N-term)
tr|G5E9R0|G5E9R0_HUMAN	R.H(+144.10)QGVMVGMGQK(+144.10).D	N	70.04	1458.76	8.7	487.266	3	45.29	31137	18	40	50	iTRAQ 4plex (K N-term)
tr|G5E9R0|G5E9R0_HUMAN	R.A(+144.10)VFPSIVGRPR.H	N	66.69	1341.8	19.5	448.282	3	88.64	52561	26	29	39	iTRAQ 4plex (K N-term)
tr|G5E9R0|G5E9R0_HUMAN	K.A(+144.10)GFAGDDAPR.A	N	66.12	1119.54	-3.3	560.776	2	33.09	25122	20	19	28	iTRAQ 4plex (K N-term)
tr|G5E9R0|G5E9R0_HUMAN	R.H(+144.10)QGVMVGM(+15.99)GQK(+144.10).D	N	56.4	1474.76	4.9	492.596	3	28.02	22627	10	40	50	iTRAQ 4plex (K N-term); Oxidation (M)
tr|G5E9R0|G5E9R0_HUMAN	K.I(+144.10)WHHTFYNELR.V	N	56.3	1658.84	-19.2	830.412	2	80.53	48554	14	85	95	iTRAQ 4plex (K N-term)
tr|G5E9R0|G5E9R0_HUMAN	K.D(+144.10)SYVGDEAQSK(+144.10).R	N	55.37	1485.71	5.9	496.248	3	31.09	24134	12	51	61	iTRAQ 4plex (K N-term)
tr|G5E9R0|G5E9R0_HUMAN	R.H(+144.10)QGVM(+15.99)VGMGQK(+144.10).D	N	51.11	1474.76	8	492.597	3	36.12	26620	7	40	50	iTRAQ 4plex (K N-term); Oxidation (M)
tr|G5E9R0|G5E9R0_HUMAN	R.A(+144.10)VFPSIVGR.P	N	46.22	1088.64	7.9	545.334	2	94.64	55532	23	29	37	iTRAQ 4plex (K N-term)
tr|G5E9R0|G5E9R0_HUMAN	K.IWHHTFYNELR.V	N	42.7	1514.74	-15.2	758.367	2	67.58	42130	2	85	95
tr|G5E9R0|G5E9R0_HUMAN	K.I(+144.10)WHHTFY(+144.10)NELR.V	N	34.98	1802.94	-19.1	902.461	2	71.24	43956	11	85	95	iTRAQ 4plex (K N-term); iTRAQ 4plex (Y)
tr|G5E9R0|G5E9R0_HUMAN	F.PSIVGRPR.H	N	24.74	880.524	19.4	441.278	2	88.75	52615	4	32	39
tr|G5E9R0|G5E9R0_HUMAN	K.R(+144.10)GILTLK(+144.10).Y	N	24.63	1087.73	4.1	544.874	2	63.71	40222	18	62	68	iTRAQ 4plex (K N-term)
tr|G5E9R0|G5E9R0_HUMAN	R.G(+144.10)ILTLK(+144.10).Y	N	22.17	931.627	17.3	466.829	2	77.09	46854	31	63	68	iTRAQ 4plex (K N-term)
tr|K7EM38|K7EM38_HUMAN	R.V(+144.10)APEEHPVLLTEAPLNPK(+144.10).A	Y	82.59	2241.26	-8.8	748.086	3	110.8	63513	22	96	113	iTRAQ 4plex (K N-term)
tr|K7EM38|K7EM38_HUMAN	R.HQGVMVGMGQK(+144.10).D	N	74.32	1314.66	-10.3	658.332	2	43.29	30151	10	40	50	iTRAQ 4plex (K N-term)
tr|K7EM38|K7EM38_HUMAN	R.H(+144.10)QGVMVGMGQK(+144.10).D	N	70.04	1458.76	8.7	487.266	3	45.29	31137	18	40	50	iTRAQ 4plex (K N-term)
tr|K7EM38|K7EM38_HUMAN	R.A(+144.10)VFPSIVGRPR.H	N	66.69	1341.8	19.5	448.282	3	88.64	52561	26	29	39	iTRAQ 4plex (K N-term)
tr|K7EM38|K7EM38_HUMAN	K.A(+144.10)GFAGDDAPR.A	N	66.12	1119.54	-3.3	560.776	2	33.09	25122	20	19	28	iTRAQ 4plex (K N-term)
tr|K7EM38|K7EM38_HUMAN	R.H(+144.10)QGVMVGM(+15.99)GQK(+144.10).D	N	56.4	1474.76	4.9	492.596	3	28.02	22627	10	40	50	iTRAQ 4plex (K N-term); Oxidation (M)
tr|K7EM38|K7EM38_HUMAN	K.I(+144.10)WHHTFYNELR.V	N	56.3	1658.84	-19.2	830.412	2	80.53	48554	14	85	95	iTRAQ 4plex (K N-term)
tr|K7EM38|K7EM38_HUMAN	K.D(+144.10)SYVGDEAQSK(+144.10).R	N	55.37	1485.71	5.9	496.248	3	31.09	24134	12	51	61	iTRAQ 4plex (K N-term)
tr|K7EM38|K7EM38_HUMAN	R.H(+144.10)QGVM(+15.99)VGMGQK(+144.10).D	N	51.11	1474.76	8	492.597	3	36.12	26620	7	40	50	iTRAQ 4plex (K N-term); Oxidation (M)
tr|K7EM38|K7EM38_HUMAN	R.A(+144.10)VFPSIVGR.P	N	46.22	1088.64	7.9	545.334	2	94.64	55532	23	29	37	iTRAQ 4plex (K N-term)
tr|K7EM38|K7EM38_HUMAN	K.IWHHTFYNELR.V	N	42.7	1514.74	-15.2	758.367	2	67.58	42130	2	85	95
tr|K7EM38|K7EM38_HUMAN	K.I(+144.10)WHHTFY(+144.10)NELR.V	N	34.98	1802.94	-19.1	902.461	2	71.24	43956	11	85	95	iTRAQ 4plex (K N-term); iTRAQ 4plex (Y)
tr|K7EM38|K7EM38_HUMAN	F.PSIVGRPR.H	N	24.74	880.524	19.4	441.278	2	88.75	52615	4	32	39
tr|K7EM38|K7EM38_HUMAN	K.R(+144.10)GILTLK(+144.10).Y	N	24.63	1087.73	4.1	544.874	2	63.71	40222	18	62	68	iTRAQ 4plex (K N-term)
tr|K7EM38|K7EM38_HUMAN	R.G(+144.10)ILTLK(+144.10).Y	N	22.17	931.627	17.3	466.829	2	77.09	46854	31	63	68	iTRAQ 4plex (K N-term)
tr|J3KT65|J3KT65_HUMAN	R.V(+144.10)APEEHPVLLTEAPLNPK(+144.10).A	Y	82.59	2241.26	-8.8	748.086	3	110.8	63513	22	96	113	iTRAQ 4plex (K N-term)
tr|J3KT65|J3KT65_HUMAN	R.HQGVMVGMGQK(+144.10).D	N	74.32	1314.66	-10.3	658.332	2	43.29	30151	10	40	50	iTRAQ 4plex (K N-term)
tr|J3KT65|J3KT65_HUMAN	R.H(+144.10)QGVMVGMGQK(+144.10).D	N	70.04	1458.76	8.7	487.266	3	45.29	31137	18	40	50	iTRAQ 4plex (K N-term)
tr|J3KT65|J3KT65_HUMAN	R.A(+144.10)VFPSIVGRPR.H	N	66.69	1341.8	19.5	448.282	3	88.64	52561	26	29	39	iTRAQ 4plex (K N-term)
tr|J3KT65|J3KT65_HUMAN	K.A(+144.10)GFAGDDAPR.A	N	66.12	1119.54	-3.3	560.776	2	33.09	25122	20	19	28	iTRAQ 4plex (K N-term)
tr|J3KT65|J3KT65_HUMAN	R.H(+144.10)QGVMVGM(+15.99)GQK(+144.10).D	N	56.4	1474.76	4.9	492.596	3	28.02	22627	10	40	50	iTRAQ 4plex (K N-term); Oxidation (M)
tr|J3KT65|J3KT65_HUMAN	K.I(+144.10)WHHTFYNELR.V	N	56.3	1658.84	-19.2	830.412	2	80.53	48554	14	85	95	iTRAQ 4plex (K N-term)
tr|J3KT65|J3KT65_HUMAN	K.D(+144.10)SYVGDEAQSK(+144.10).R	N	55.37	1485.71	5.9	496.248	3	31.09	24134	12	51	61	iTRAQ 4plex (K N-term)
tr|J3KT65|J3KT65_HUMAN	R.H(+144.10)QGVM(+15.99)VGMGQK(+144.10).D	N	51.11	1474.76	8	492.597	3	36.12	26620	7	40	50	iTRAQ 4plex (K N-term); Oxidation (M)
tr|J3KT65|J3KT65_HUMAN	R.A(+144.10)VFPSIVGR.P	N	46.22	1088.64	7.9	545.334	2	94.64	55532	23	29	37	iTRAQ 4plex (K N-term)
tr|J3KT65|J3KT65_HUMAN	K.IWHHTFYNELR.V	N	42.7	1514.74	-15.2	758.367	2	67.58	42130	2	85	95
tr|J3KT65|J3KT65_HUMAN	K.I(+144.10)WHHTFY(+144.10)NELR.V	N	34.98	1802.94	-19.1	902.461	2	71.24	43956	11	85	95	iTRAQ 4plex (K N-term); iTRAQ 4plex (Y)
tr|J3KT65|J3KT65_HUMAN	F.PSIVGRPR.H	N	24.74	880.524	19.4	441.278	2	88.75	52615	4	32	39
tr|J3KT65|J3KT65_HUMAN	K.R(+144.10)GILTLK(+144.10).Y	N	24.63	1087.73	4.1	544.874	2	63.71	40222	18	62	68	iTRAQ 4plex (K N-term)
tr|J3KT65|J3KT65_HUMAN	R.G(+144.10)ILTLK(+144.10).Y	N	22.17	931.627	17.3	466.829	2	77.09	46854	31	63	68	iTRAQ 4plex (K N-term)
sp|Q562R1|ACTBL_HUMAN	R.S(+144.10)YELPDGQVITIGNER.F	N	78.43	1933.98	-1.3	645.668	3	115.06	65625	21	240	255	iTRAQ 4plex (K N-term)
sp|Q562R1|ACTBL_HUMAN	R.S(+144.10)Y(+144.10)ELPDGQVITIGNER.F	N	78.18	2078.08	-6	693.698	3	100.27	58310	8	240	255	iTRAQ 4plex (K N-term); iTRAQ 4plex (Y)
sp|Q562R1|ACTBL_HUMAN	R.HQGVMVGMGQK(+144.10).D	N	74.32	1314.66	-10.3	658.332	2	43.29	30151	10	41	51	iTRAQ 4plex (K N-term)
sp|Q562R1|ACTBL_HUMAN	R.H(+144.10)QGVMVGMGQK(+144.10).D	N	70.04	1458.76	8.7	487.266	3	45.29	31137	18	41	51	iTRAQ 4plex (K N-term)
sp|Q562R1|ACTBL_HUMAN	R.H(+144.10)QGVMVGM(+15.99)GQK(+144.10).D	N	56.4	1474.76	4.9	492.596	3	28.02	22627	10	41	51	iTRAQ 4plex (K N-term); Oxidation (M)
sp|Q562R1|ACTBL_HUMAN	R.D(+144.10)LTDYLMK(+144.10).I	N	51.64	1285.68	0.3	643.847	2	98.49	57440	20	185	192	iTRAQ 4plex (K N-term)
sp|Q562R1|ACTBL_HUMAN	R.H(+144.10)QGVM(+15.99)VGMGQK(+144.10).D	N	51.11	1474.76	8	492.597	3	36.12	26620	7	41	51	iTRAQ 4plex (K N-term); Oxidation (M)
sp|Q562R1|ACTBL_HUMAN	R.D(+144.10)LTDY(+144.10)LMK(+144.10).I	N	34.75	1429.78	14.8	477.607	3	86.49	51505	6	185	192	iTRAQ 4plex (K N-term); iTRAQ 4plex (Y)
sp|Q562R1|ACTBL_HUMAN	K.I(+144.10)IAPPER.K	N	34.74	938.565	12.4	470.296	2	53.56	35215	25	330	336	iTRAQ 4plex (K N-term)
sp|Q562R1|ACTBL_HUMAN	Y.A(+144.10)LPHAILR.L	Y	32.66	1033.65	8.1	517.836	2	66.02	41358	10	171	178	iTRAQ 4plex (K N-term)
sp|Q562R1|ACTBL_HUMAN	R.D(+144.10)LTDYLM(+15.99)K(+144.10).I	N	30.2	1301.67	-2.7	651.842	2	85.6	51068	11	185	192	iTRAQ 4plex (K N-term); Oxidation (M)
sp|Q562R1|ACTBL_HUMAN	K.I(+144.10)IAPPERK(+144.10).Y	N	28.74	1210.76	21.1	404.603	3	51.37	34127	17	330	337	iTRAQ 4plex (K N-term)
sp|Q562R1|ACTBL_HUMAN	K.IIAPPER.K	N	28.05	794.465	11.2	398.244	2	36.89	27009	1	330	336
sp|Q562R1|ACTBL_HUMAN	R.L(+144.10)DLAGR.D	N	26.11	787.465	21.9	394.749	2	43.95	30473	21	179	184	iTRAQ 4plex (K N-term)
sp|P08670|VIME_HUMAN	R.L(+144.10)LQDSVDFSLADAINTEFK(+144.10).N	Y	84.39	2413.26	-12	805.417	3	166.76	91296	16	79	97	iTRAQ 4plex (K N-term)
sp|P08670|VIME_HUMAN	R.V(+144.10)EVERDNLAEDIMR.L	Y	73.49	1831.92	1.8	611.648	3	95.42	55921	10	171	184	iTRAQ 4plex (K N-term)
sp|P08670|VIME_HUMAN	R.L(+144.10)QDEIQNMK(+144.10)EEMAR.H	Y	70.16	2022.01	-3.4	675.008	3	112.11	64163	7	365	378	iTRAQ 4plex (K N-term)
sp|P08670|VIME_HUMAN	R.Q(+144.10)VQSLTC(+57.02)EVDALK(+144.10).G	Y	67.18	1777.94	2.9	593.657	3	102.18	59254	1	322	334	iTRAQ 4plex (K N-term); Carbamidomethylation
sp|P08670|VIME_HUMAN	R.E(+144.10)YQDLLNVK(+144.10).M	Y	67.1	1408.78	-7.6	705.39	2	90.16	53317	16	382	390	iTRAQ 4plex (K N-term)
sp|P08670|VIME_HUMAN	K.F(+144.10)ADLSEAANR.N	Y	64.23	1236.62	-3.8	619.315	2	62.49	39618	18	295	304	iTRAQ 4plex (K N-term)
sp|P08670|VIME_HUMAN	R.D(+144.10)NLAEDIMR.L	Y	61.2	1219.6	-3.2	610.804	2	79.68	48133	16	176	184	iTRAQ 4plex (K N-term)
sp|P08670|VIME_HUMAN	R.L(+144.10)GDLYEEEMR.E	Y	60.9	1397.66	-6.7	699.832	2	85.32	50930	16	146	155	iTRAQ 4plex (K N-term)
sp|P08670|VIME_HUMAN	R.TYSLGSALRPSTSR.S	Y	60.79	1494.78	8.5	499.271	3	66.06	41377	17	37	50
sp|P08670|VIME_HUMAN	K.M(+144.10)ALDIEIATYR.K	Y	58.81	1438.76	-6.5	720.382	2	120.72	68442	16	391	401	iTRAQ 4plex (K N-term)
sp|P08670|VIME_HUMAN	K.I(+144.10)LLAELEQLK(+144.10).G	Y	57.26	1456.91	-5.3	729.457	2	152.4	84222	19	130	139	iTRAQ 4plex (K N-term)
sp|P08670|VIME_HUMAN	R.T(+144.10)NEK(+144.10)VELQELNDR.F	Y	56.4	1874.99	-8.4	625.999	3	64.39	40557	10	101	113	iTRAQ 4plex (K N-term)
sp|P08670|VIME_HUMAN	K.N(+144.10)LQEAEEWYK(+144.10).S	Y	55.68	1596.8	-14.7	799.395	2	80.75	48664	18	283	292	iTRAQ 4plex (K N-term)
sp|P08670|VIME_HUMAN	R.Q(+144.10)QYESVAAK(+144.10).N	Y	54.53	1310.7	-9.1	656.353	2	34.66	25894	8	274	282	iTRAQ 4plex (K N-term)
sp|P08670|VIME_HUMAN	R.Q(+144.10)DVDNASLAR.L	Y	53.65	1231.63	-6.9	616.816	2	28.59	22902	7	208	217	iTRAQ 4plex (K N-term)
sp|P08670|VIME_HUMAN	R.S(+144.10)YVTTSTR.T	Y	52.39	1057.55	1	529.783	2	20.89	19084	12	29	36	iTRAQ 4plex (K N-term)
sp|P08670|VIME_HUMAN	R.T(+144.10)YSLGSALRPSTSR.S	Y	50.97	1638.88	4.3	547.303	3	69.91	43294	10	37	50	iTRAQ 4plex (K N-term)
sp|P08670|VIME_HUMAN	K.V(+144.10)ELQELNDR.F	Y	48.19	1258.66	-3	630.336	2	67.25	41965	17	105	113	iTRAQ 4plex (K N-term)
sp|P08670|VIME_HUMAN	R.L(+144.10)QDEIQNMK(+144.10).E	Y	47.44	1405.74	-7.3	703.874	2	75.41	46012	9	365	373	iTRAQ 4plex (K N-term)
sp|P08670|VIME_HUMAN	R.S(+144.10)VSSSSYR.R	Y	45.69	1015.5	3.3	508.761	2	13.9	15639	7	5	12	iTRAQ 4plex (K N-term)
sp|P08670|VIME_HUMAN	K.L(+144.10)QEEMLQR.E	Y	42.85	1189.62	-1.3	595.818	2	61.27	39016	12	189	196	iTRAQ 4plex (K N-term)
sp|P08670|VIME_HUMAN	K.FADLSEAANR.N	Y	42.27	1092.52	-0.7	547.267	2	46.46	31711	4	295	304
sp|P08670|VIME_HUMAN	R.E(+144.10)Y(+144.10)QDLLNVK(+144.10).M	Y	42.15	1552.88	-11.8	777.436	2	79.09	47839	9	382	390	iTRAQ 4plex (K N-term); iTRAQ 4plex (Y)
sp|P08670|VIME_HUMAN	R.Q(-17.03)QYESVAAK(+144.10).N	Y	40.95	1149.58	-0.1	575.795	2	42.75	29883	9	274	282	Pyro-glu from Q; iTRAQ 4plex (K N-term)
sp|P08670|VIME_HUMAN	R.Q(+144.10)VDQLTNDK(+144.10).A	Y	40.58	1347.72	12.3	450.253	3	39.46	28266	11	160	168	iTRAQ 4plex (K N-term)
sp|P08670|VIME_HUMAN	R.E(+144.10)K(+144.10)LQEEMLQR.E	Y	40.14	1590.86	6.4	531.297	3	59.18	37969	11	187	196	iTRAQ 4plex (K N-term)
sp|P08670|VIME_HUMAN	R.S(+144.10)SVPGVR.L	Y	39.64	844.487	14.7	423.257	2	23.87	20562	15	72	78	iTRAQ 4plex (K N-term)
sp|P08670|VIME_HUMAN	K.L(+144.10)LEGEESR.I	N	38.05	1075.56	5.3	538.791	2	36.8	26955	14	403	410	iTRAQ 4plex (K N-term)
sp|P08670|VIME_HUMAN	R.F(+144.10)ANYIDK(+144.10).V	Y	37.86	1157.63	2.4	579.823	2	70.38	43527	9	114	120	iTRAQ 4plex (K N-term)
sp|P08670|VIME_HUMAN	K.N(+144.10)LQEAEEWY(+144.10)K(+144.10).S	Y	37.32	1740.9	7	581.311	3	72.83	44743	4	283	292	iTRAQ 4plex (K N-term); iTRAQ 4plex (Y)
sp|P08670|VIME_HUMAN	R.R(+144.10)QVDQLTNDK(+144.10).A	Y	36.07	1503.82	2	502.282	3	32.97	25064	1	159	168	iTRAQ 4plex (K N-term)
sp|P08670|VIME_HUMAN	K.G(+144.10)TNESLER.Q	Y	35.46	1048.53	2.7	525.271	2	13.77	15574	9	335	342	iTRAQ 4plex (K N-term)
sp|P08670|VIME_HUMAN	R.Q(-17.03)VDQLTNDK(+144.10).A	Y	33.87	1186.59	-2.8	594.302	2	52.58	34734	3	160	168	Pyro-glu from Q; iTRAQ 4plex (K N-term)
sp|P08670|VIME_HUMAN	R.FLEQQNK(+144.10).I	Y	32.83	1049.56	-0.4	525.787	2	26.27	21757	9	123	129	iTRAQ 4plex (K N-term)
sp|P08670|VIME_HUMAN	R.TY(+144.10)SLGSALRPSTSR.S	Y	32.12	1638.88	16.1	410.734	4	58.92	37844	4	37	50	iTRAQ 4plex (Y)
sp|P08670|VIME_HUMAN	R.Q(-17.03)QY(+144.10)ESVAAK(+144.10).N	Y	31.1	1293.68	-10	647.839	2	40.72	28886	1	274	282	Pyro-glu from Q; iTRAQ 4plex (Y); iTRAQ 4plex (K N-term)
sp|P08670|VIME_HUMAN	R.L(+144.10)GDLY(+144.10)EEEMR.E	Y	30.96	1541.76	10	514.932	3	76.7	46660	2	146	155	iTRAQ 4plex (K N-term); iTRAQ 4plex (Y)
sp|P08670|VIME_HUMAN	K.M(+144.10)ALDIEIATY(+144.10)R.K	Y	30.51	1582.86	10.3	528.632	3	109.74	62991	4	391	401	iTRAQ 4plex (K N-term); iTRAQ 4plex (Y)
sp|P08670|VIME_HUMAN	K.KLHEEEIQ(+.98)ELQ(+.98)AQIQEQHVQIDVDVSK(+144.10)PDLTAALR.D	Y	28.43	4196.17	-11	840.232	5	153.12	84578	1	236	270	Deamidation (NQ); iTRAQ 4plex (K N-term)
sp|P08670|VIME_HUMAN	R.F(+144.10)LEQQNK(+144.10).I	Y	25.57	1193.66	-3.7	597.835	2	42.16	29590	13	123	129	iTRAQ 4plex (K N-term)
tr|B0YJC4|B0YJC4_HUMAN	R.L(+144.10)LQDSVDFSLADAINTEFK(+144.10).N	Y	84.39	2413.26	-12	805.417	3	166.76	91296	16	79	97	iTRAQ 4plex (K N-term)
tr|B0YJC4|B0YJC4_HUMAN	R.V(+144.10)EVERDNLAEDIMR.L	Y	73.49	1831.92	1.8	611.648	3	95.42	55921	10	171	184	iTRAQ 4plex (K N-term)
tr|B0YJC4|B0YJC4_HUMAN	R.L(+144.10)QDEIQNMK(+144.10)EEMAR.H	Y	70.16	2022.01	-3.4	675.008	3	112.11	64163	7	365	378	iTRAQ 4plex (K N-term)
tr|B0YJC4|B0YJC4_HUMAN	R.Q(+144.10)VQSLTC(+57.02)EVDALK(+144.10).G	Y	67.18	1777.94	2.9	593.657	3	102.18	59254	1	322	334	iTRAQ 4plex (K N-term); Carbamidomethylation
tr|B0YJC4|B0YJC4_HUMAN	R.E(+144.10)YQDLLNVK(+144.10).M	Y	67.1	1408.78	-7.6	705.39	2	90.16	53317	16	382	390	iTRAQ 4plex (K N-term)
tr|B0YJC4|B0YJC4_HUMAN	K.F(+144.10)ADLSEAANR.N	Y	64.23	1236.62	-3.8	619.315	2	62.49	39618	18	295	304	iTRAQ 4plex (K N-term)
tr|B0YJC4|B0YJC4_HUMAN	R.D(+144.10)NLAEDIMR.L	Y	61.2	1219.6	-3.2	610.804	2	79.68	48133	16	176	184	iTRAQ 4plex (K N-term)
tr|B0YJC4|B0YJC4_HUMAN	R.L(+144.10)GDLYEEEMR.E	Y	60.9	1397.66	-6.7	699.832	2	85.32	50930	16	146	155	iTRAQ 4plex (K N-term)
tr|B0YJC4|B0YJC4_HUMAN	R.TYSLGSALRPSTSR.S	Y	60.79	1494.78	8.5	499.271	3	66.06	41377	17	37	50
tr|B0YJC4|B0YJC4_HUMAN	K.M(+144.10)ALDIEIATYR.K	Y	58.81	1438.76	-6.5	720.382	2	120.72	68442	16	391	401	iTRAQ 4plex (K N-term)
tr|B0YJC4|B0YJC4_HUMAN	K.I(+144.10)LLAELEQLK(+144.10).G	Y	57.26	1456.91	-5.3	729.457	2	152.4	84222	19	130	139	iTRAQ 4plex (K N-term)
tr|B0YJC4|B0YJC4_HUMAN	R.T(+144.10)NEK(+144.10)VELQELNDR.F	Y	56.4	1874.99	-8.4	625.999	3	64.39	40557	10	101	113	iTRAQ 4plex (K N-term)
tr|B0YJC4|B0YJC4_HUMAN	K.N(+144.10)LQEAEEWYK(+144.10).S	Y	55.68	1596.8	-14.7	799.395	2	80.75	48664	18	283	292	iTRAQ 4plex (K N-term)
tr|B0YJC4|B0YJC4_HUMAN	R.Q(+144.10)QYESVAAK(+144.10).N	Y	54.53	1310.7	-9.1	656.353	2	34.66	25894	8	274	282	iTRAQ 4plex (K N-term)
tr|B0YJC4|B0YJC4_HUMAN	R.Q(+144.10)DVDNASLAR.L	Y	53.65	1231.63	-6.9	616.816	2	28.59	22902	7	208	217	iTRAQ 4plex (K N-term)
tr|B0YJC4|B0YJC4_HUMAN	R.S(+144.10)YVTTSTR.T	Y	52.39	1057.55	1	529.783	2	20.89	19084	12	29	36	iTRAQ 4plex (K N-term)
tr|B0YJC4|B0YJC4_HUMAN	R.T(+144.10)YSLGSALRPSTSR.S	Y	50.97	1638.88	4.3	547.303	3	69.91	43294	10	37	50	iTRAQ 4plex (K N-term)
tr|B0YJC4|B0YJC4_HUMAN	K.V(+144.10)ELQELNDR.F	Y	48.19	1258.66	-3	630.336	2	67.25	41965	17	105	113	iTRAQ 4plex (K N-term)
tr|B0YJC4|B0YJC4_HUMAN	R.L(+144.10)QDEIQNMK(+144.10).E	Y	47.44	1405.74	-7.3	703.874	2	75.41	46012	9	365	373	iTRAQ 4plex (K N-term)
tr|B0YJC4|B0YJC4_HUMAN	R.S(+144.10)VSSSSYR.R	Y	45.69	1015.5	3.3	508.761	2	13.9	15639	7	5	12	iTRAQ 4plex (K N-term)
tr|B0YJC4|B0YJC4_HUMAN	K.L(+144.10)QEEMLQR.E	Y	42.85	1189.62	-1.3	595.818	2	61.27	39016	12	189	196	iTRAQ 4plex (K N-term)
tr|B0YJC4|B0YJC4_HUMAN	K.FADLSEAANR.N	Y	42.27	1092.52	-0.7	547.267	2	46.46	31711	4	295	304
tr|B0YJC4|B0YJC4_HUMAN	R.E(+144.10)Y(+144.10)QDLLNVK(+144.10).M	Y	42.15	1552.88	-11.8	777.436	2	79.09	47839	9	382	390	iTRAQ 4plex (K N-term); iTRAQ 4plex (Y)
tr|B0YJC4|B0YJC4_HUMAN	R.Q(-17.03)QYESVAAK(+144.10).N	Y	40.95	1149.58	-0.1	575.795	2	42.75	29883	9	274	282	Pyro-glu from Q; iTRAQ 4plex (K N-term)
tr|B0YJC4|B0YJC4_HUMAN	R.Q(+144.10)VDQLTNDK(+144.10).A	Y	40.58	1347.72	12.3	450.253	3	39.46	28266	11	160	168	iTRAQ 4plex (K N-term)
tr|B0YJC4|B0YJC4_HUMAN	R.E(+144.10)K(+144.10)LQEEMLQR.E	Y	40.14	1590.86	6.4	531.297	3	59.18	37969	11	187	196	iTRAQ 4plex (K N-term)
tr|B0YJC4|B0YJC4_HUMAN	R.S(+144.10)SVPGVR.L	Y	39.64	844.487	14.7	423.257	2	23.87	20562	15	72	78	iTRAQ 4plex (K N-term)
tr|B0YJC4|B0YJC4_HUMAN	K.L(+144.10)LEGEESR.I	N	38.05	1075.56	5.3	538.791	2	36.8	26955	14	403	410	iTRAQ 4plex (K N-term)
tr|B0YJC4|B0YJC4_HUMAN	R.F(+144.10)ANYIDK(+144.10).V	Y	37.86	1157.63	2.4	579.823	2	70.38	43527	9	114	120	iTRAQ 4plex (K N-term)
tr|B0YJC4|B0YJC4_HUMAN	K.N(+144.10)LQEAEEWY(+144.10)K(+144.10).S	Y	37.32	1740.9	7	581.311	3	72.83	44743	4	283	292	iTRAQ 4plex (K N-term); iTRAQ 4plex (Y)
tr|B0YJC4|B0YJC4_HUMAN	R.R(+144.10)QVDQLTNDK(+144.10).A	Y	36.07	1503.82	2	502.282	3	32.97	25064	1	159	168	iTRAQ 4plex (K N-term)
tr|B0YJC4|B0YJC4_HUMAN	K.G(+144.10)TNESLER.Q	Y	35.46	1048.53	2.7	525.271	2	13.77	15574	9	335	342	iTRAQ 4plex (K N-term)
tr|B0YJC4|B0YJC4_HUMAN	R.Q(-17.03)VDQLTNDK(+144.10).A	Y	33.87	1186.59	-2.8	594.302	2	52.58	34734	3	160	168	Pyro-glu from Q; iTRAQ 4plex (K N-term)
tr|B0YJC4|B0YJC4_HUMAN	R.FLEQQNK(+144.10).I	Y	32.83	1049.56	-0.4	525.787	2	26.27	21757	9	123	129	iTRAQ 4plex (K N-term)
tr|B0YJC4|B0YJC4_HUMAN	R.TY(+144.10)SLGSALRPSTSR.S	Y	32.12	1638.88	16.1	410.734	4	58.92	37844	4	37	50	iTRAQ 4plex (Y)
tr|B0YJC4|B0YJC4_HUMAN	R.Q(-17.03)QY(+144.10)ESVAAK(+144.10).N	Y	31.1	1293.68	-10	647.839	2	40.72	28886	1	274	282	Pyro-glu from Q; iTRAQ 4plex (Y); iTRAQ 4plex (K N-term)
tr|B0YJC4|B0YJC4_HUMAN	R.L(+144.10)GDLY(+144.10)EEEMR.E	Y	30.96	1541.76	10	514.932	3	76.7	46660	2	146	155	iTRAQ 4plex (K N-term); iTRAQ 4plex (Y)
tr|B0YJC4|B0YJC4_HUMAN	K.M(+144.10)ALDIEIATY(+144.10)R.K	Y	30.51	1582.86	10.3	528.632	3	109.74	62991	4	391	401	iTRAQ 4plex (K N-term); iTRAQ 4plex (Y)
tr|B0YJC4|B0YJC4_HUMAN	K.KLHEEEIQ(+.98)ELQ(+.98)AQIQEQHVQIDVDVSK(+144.10)PDLTAALR.D	Y	28.43	4196.17	-11	840.232	5	153.12	84578	1	236	270	Deamidation (NQ); iTRAQ 4plex (K N-term)
tr|B0YJC4|B0YJC4_HUMAN	R.F(+144.10)LEQQNK(+144.10).I	Y	25.57	1193.66	-3.7	597.835	2	42.16	29590	13	123	129	iTRAQ 4plex (K N-term)
tr|B0YJC5|B0YJC5_HUMAN	R.L(+144.10)QDEIQNMK(+144.10)EEMAR.H	Y	70.16	2022.01	-3.4	675.008	3	112.11	64163	7	183	196	iTRAQ 4plex (K N-term)
tr|B0YJC5|B0YJC5_HUMAN	R.Q(+144.10)VQSLTC(+57.02)EVDALK(+144.10).G	Y	67.18	1777.94	2.9	593.657	3	102.18	59254	1	140	152	iTRAQ 4plex (K N-term); Carbamidomethylation
tr|B0YJC5|B0YJC5_HUMAN	R.E(+144.10)YQDLLNVK(+144.10).M	Y	67.1	1408.78	-7.6	705.39	2	90.16	53317	16	200	208	iTRAQ 4plex (K N-term)
tr|B0YJC5|B0YJC5_HUMAN	K.F(+144.10)ADLSEAANR.N	Y	64.23	1236.62	-3.8	619.315	2	62.49	39618	18	113	122	iTRAQ 4plex (K N-term)
tr|B0YJC5|B0YJC5_HUMAN	K.M(+144.10)ALDIEIATYR.K	Y	58.81	1438.76	-6.5	720.382	2	120.72	68442	16	209	219	iTRAQ 4plex (K N-term)
tr|B0YJC5|B0YJC5_HUMAN	K.N(+144.10)LQEAEEWYK(+144.10).S	Y	55.68	1596.8	-14.7	799.395	2	80.75	48664	18	101	110	iTRAQ 4plex (K N-term)
tr|B0YJC5|B0YJC5_HUMAN	R.Q(+144.10)QYESVAAK(+144.10).N	Y	54.53	1310.7	-9.1	656.353	2	34.66	25894	8	92	100	iTRAQ 4plex (K N-term)
tr|B0YJC5|B0YJC5_HUMAN	R.Q(+144.10)DVDNASLAR.L	Y	53.65	1231.63	-6.9	616.816	2	28.59	22902	7	26	35	iTRAQ 4plex (K N-term)
tr|B0YJC5|B0YJC5_HUMAN	R.L(+144.10)QDEIQNMK(+144.10).E	Y	47.44	1405.74	-7.3	703.874	2	75.41	46012	9	183	191	iTRAQ 4plex (K N-term)
tr|B0YJC5|B0YJC5_HUMAN	R.L(+144.10)QEEMLQR.E	Y	42.85	1189.62	-1.3	595.818	2	61.27	39016	12	7	14	iTRAQ 4plex (K N-term)
tr|B0YJC5|B0YJC5_HUMAN	K.FADLSEAANR.N	Y	42.27	1092.52	-0.7	547.267	2	46.46	31711	4	113	122
tr|B0YJC5|B0YJC5_HUMAN	R.E(+144.10)Y(+144.10)QDLLNVK(+144.10).M	Y	42.15	1552.88	-11.8	777.436	2	79.09	47839	9	200	208	iTRAQ 4plex (K N-term); iTRAQ 4plex (Y)
tr|B0YJC5|B0YJC5_HUMAN	R.Q(-17.03)QYESVAAK(+144.10).N	Y	40.95	1149.58	-0.1	575.795	2	42.75	29883	9	92	100	Pyro-glu from Q; iTRAQ 4plex (K N-term)
tr|B0YJC5|B0YJC5_HUMAN	K.L(+144.10)LEGEESR	N	38.05	1075.56	5.3	538.791	2	36.8	26955	14	221	228	iTRAQ 4plex (K N-term)
tr|B0YJC5|B0YJC5_HUMAN	K.N(+144.10)LQEAEEWY(+144.10)K(+144.10).S	Y	37.32	1740.9	7	581.311	3	72.83	44743	4	101	110	iTRAQ 4plex (K N-term); iTRAQ 4plex (Y)
tr|B0YJC5|B0YJC5_HUMAN	K.G(+144.10)TNESLER.Q	Y	35.46	1048.53	2.7	525.271	2	13.77	15574	9	153	160	iTRAQ 4plex (K N-term)
tr|B0YJC5|B0YJC5_HUMAN	R.Q(-17.03)QY(+144.10)ESVAAK(+144.10).N	Y	31.1	1293.68	-10	647.839	2	40.72	28886	1	92	100	Pyro-glu from Q; iTRAQ 4plex (Y); iTRAQ 4plex (K N-term)
tr|B0YJC5|B0YJC5_HUMAN	K.M(+144.10)ALDIEIATY(+144.10)R.K	Y	30.51	1582.86	10.3	528.632	3	109.74	62991	4	209	219	iTRAQ 4plex (K N-term); iTRAQ 4plex (Y)
tr|B0YJC5|B0YJC5_HUMAN	K.KLHEEEIQ(+.98)ELQ(+.98)AQIQEQHVQIDVDVSK(+144.10)PDLTAALR.D	Y	28.43	4196.17	-11	840.232	5	153.12	84578	1	54	88	Deamidation (NQ); iTRAQ 4plex (K N-term)
tr|Q5JVS8|Q5JVS8_HUMAN	R.Q(+144.10)VQSLTC(+57.02)EVDALK(+144.10).G	Y	67.18	1777.94	2.9	593.657	3	102.18	59254	1	148	160	iTRAQ 4plex (K N-term); Carbamidomethylation
tr|Q5JVS8|Q5JVS8_HUMAN	K.F(+144.10)ADLSEAANR.N	Y	64.23	1236.62	-3.8	619.315	2	62.49	39618	18	121	130	iTRAQ 4plex (K N-term)
tr|Q5JVS8|Q5JVS8_HUMAN	K.N(+144.10)LQEAEEWYK(+144.10).S	Y	55.68	1596.8	-14.7	799.395	2	80.75	48664	18	109	118	iTRAQ 4plex (K N-term)
tr|Q5JVS8|Q5JVS8_HUMAN	R.Q(+144.10)QYESVAAK(+144.10).N	Y	54.53	1310.7	-9.1	656.353	2	34.66	25894	8	100	108	iTRAQ 4plex (K N-term)
tr|Q5JVS8|Q5JVS8_HUMAN	R.Q(+144.10)DVDNASLAR.L	Y	53.65	1231.63	-6.9	616.816	2	28.59	22902	7	34	43	iTRAQ 4plex (K N-term)
tr|Q5JVS8|Q5JVS8_HUMAN	R.L(+144.10)QEEMLQR.E	Y	42.85	1189.62	-1.3	595.818	2	61.27	39016	12	15	22	iTRAQ 4plex (K N-term)
tr|Q5JVS8|Q5JVS8_HUMAN	K.FADLSEAANR.N	Y	42.27	1092.52	-0.7	547.267	2	46.46	31711	4	121	130
tr|Q5JVS8|Q5JVS8_HUMAN	R.Q(-17.03)QYESVAAK(+144.10).N	Y	40.95	1149.58	-0.1	575.795	2	42.75	29883	9	100	108	Pyro-glu from Q; iTRAQ 4plex (K N-term)
tr|Q5JVS8|Q5JVS8_HUMAN	K.N(+144.10)LQEAEEWY(+144.10)K(+144.10).S	Y	37.32	1740.9	7	581.311	3	72.83	44743	4	109	118	iTRAQ 4plex (K N-term); iTRAQ 4plex (Y)
tr|Q5JVS8|Q5JVS8_HUMAN	R.Q(-17.03)QY(+144.10)ESVAAK(+144.10).N	Y	31.1	1293.68	-10	647.839	2	40.72	28886	1	100	108	Pyro-glu from Q; iTRAQ 4plex (Y); iTRAQ 4plex (K N-term)
tr|Q5JVS8|Q5JVS8_HUMAN	K.KLHEEEIQ(+.98)ELQ(+.98)AQIQEQHVQIDVDVSK(+144.10)PDLTAALR.D	Y	28.43	4196.17	-11	840.232	5	153.12	84578	1	62	96	Deamidation (NQ); iTRAQ 4plex (K N-term)
sp|P17661|DESM_HUMAN	R.E(+144.10)YQDLLNVK(+144.10).M	Y	67.1	1408.78	-7.6	705.39	2	90.16	53317	16	387	395	iTRAQ 4plex (K N-term)
sp|P17661|DESM_HUMAN	R.T(+144.10)NEK(+144.10)VELQELNDR.F	Y	56.4	1874.99	-8.4	625.999	3	64.39	40557	10	106	118	iTRAQ 4plex (K N-term)
sp|P17661|DESM_HUMAN	K.V(+144.10)ELQELNDR.F	Y	48.19	1258.66	-3	630.336	2	67.25	41965	17	110	118	iTRAQ 4plex (K N-term)
sp|P17661|DESM_HUMAN	R.E(+144.10)Y(+144.10)QDLLNVK(+144.10).M	Y	42.15	1552.88	-11.8	777.436	2	79.09	47839	9	387	395	iTRAQ 4plex (K N-term); iTRAQ 4plex (Y)
sp|P17661|DESM_HUMAN	K.L(+144.10)LEGEESR.I	N	38.05	1075.56	5.3	538.791	2	36.8	26955	14	408	415	iTRAQ 4plex (K N-term)
tr|H7C5W5|H7C5W5_HUMAN	K.M(+144.10)ALDIEIATYR.K	Y	58.81	1438.76	-6.5	720.382	2	120.72	68442	16	116	126	iTRAQ 4plex (K N-term)
tr|H7C5W5|H7C5W5_HUMAN	K.N(+144.10)LQEAEEWYK(+144.10).S	Y	55.68	1596.8	-14.7	799.395	2	80.75	48664	18	8	17	iTRAQ 4plex (K N-term)
tr|H7C5W5|H7C5W5_HUMAN	K.L(+144.10)LEGEESR.I	N	38.05	1075.56	5.3	538.791	2	36.8	26955	14	128	135	iTRAQ 4plex (K N-term)
tr|H7C5W5|H7C5W5_HUMAN	K.N(+144.10)LQEAEEWY(+144.10)K(+144.10).S	Y	37.32	1740.9	7	581.311	3	72.83	44743	4	8	17	iTRAQ 4plex (K N-term); iTRAQ 4plex (Y)
tr|H7C5W5|H7C5W5_HUMAN	K.M(+144.10)ALDIEIATY(+144.10)R.K	Y	30.51	1582.86	10.3	528.632	3	109.74	62991	4	116	126	iTRAQ 4plex (K N-term); iTRAQ 4plex (Y)
sp|P41219|PERI_HUMAN	K.M(+144.10)ALDIEIATYR.K	Y	58.81	1438.76	-6.5	720.382	2	120.72	68442	16	387	397	iTRAQ 4plex (K N-term)
sp|P41219|PERI_HUMAN	K.N(+144.10)LQEAEEWYK(+144.10).S	Y	55.68	1596.8	-14.7	799.395	2	80.75	48664	18	279	288	iTRAQ 4plex (K N-term)
sp|P41219|PERI_HUMAN	K.L(+144.10)LEGEESR.I	N	38.05	1075.56	5.3	538.791	2	36.8	26955	14	399	406	iTRAQ 4plex (K N-term)
sp|P41219|PERI_HUMAN	K.N(+144.10)LQEAEEWY(+144.10)K(+144.10).S	Y	37.32	1740.9	7	581.311	3	72.83	44743	4	279	288	iTRAQ 4plex (K N-term); iTRAQ 4plex (Y)
sp|P41219|PERI_HUMAN	K.M(+144.10)ALDIEIATY(+144.10)R.K	Y	30.51	1582.86	10.3	528.632	3	109.74	62991	4	387	397	iTRAQ 4plex (K N-term); iTRAQ 4plex (Y)
sp|P14136|GFAP_HUMAN	Q.E(+144.10)YQDLLNVK(+144.10).L	Y	67.1	1408.78	-7.6	705.39	2	90.16	53317	16	348	356	iTRAQ 4plex (K N-term)
sp|P14136|GFAP_HUMAN	Q.E(+144.10)Y(+144.10)QDLLNVK(+144.10).L	Y	42.15	1552.88	-11.8	777.436	2	79.09	47839	9	348	356	iTRAQ 4plex (K N-term); iTRAQ 4plex (Y)
sp|P14136|GFAP_HUMAN	R.G(+144.10)TNESLER.Q	Y	35.46	1048.53	2.7	525.271	2	13.77	15574	9	301	308	iTRAQ 4plex (K N-term)
sp|P14136|GFAP_HUMAN	R.FLEQQNK(+144.10).A	Y	32.83	1049.56	-0.4	525.787	2	26.27	21757	9	89	95	iTRAQ 4plex (K N-term)
sp|P14136|GFAP_HUMAN	R.F(+144.10)LEQQNK(+144.10).A	Y	25.57	1193.66	-3.7	597.835	2	42.16	29590	13	89	95	iTRAQ 4plex (K N-term)
tr|K7EJU1|K7EJU1_HUMAN	E.E(+144.10)YQDLLNVK(+144.10).L	Y	67.1	1408.78	-7.6	705.39	2	90.16	53317	16	207	215	iTRAQ 4plex (K N-term)
tr|K7EJU1|K7EJU1_HUMAN	E.E(+144.10)Y(+144.10)QDLLNVK(+144.10).L	Y	42.15	1552.88	-11.8	777.436	2	79.09	47839	9	207	215	iTRAQ 4plex (K N-term); iTRAQ 4plex (Y)
tr|K7EJU1|K7EJU1_HUMAN	R.FLEQQNK(+144.10).A	Y	32.83	1049.56	-0.4	525.787	2	26.27	21757	9	89	95	iTRAQ 4plex (K N-term)
tr|K7EJU1|K7EJU1_HUMAN	R.F(+144.10)LEQQNK(+144.10).A	Y	25.57	1193.66	-3.7	597.835	2	42.16	29590	13	89	95	iTRAQ 4plex (K N-term)
tr|K7EKH6|K7EKH6_HUMAN	Q.E(+144.10)YQDLLNVK(+144.10).L	Y	67.1	1408.78	-7.6	705.39	2	90.16	53317	16	174	182	iTRAQ 4plex (K N-term)
tr|K7EKH6|K7EKH6_HUMAN	Q.E(+144.10)Y(+144.10)QDLLNVK(+144.10).L	Y	42.15	1552.88	-11.8	777.436	2	79.09	47839	9	174	182	iTRAQ 4plex (K N-term); iTRAQ 4plex (Y)
tr|K7EKH6|K7EKH6_HUMAN	R.G(+144.10)TNESLER.Q	Y	35.46	1048.53	2.7	525.271	2	13.77	15574	9	127	134	iTRAQ 4plex (K N-term)
sp|P05787|K2C8_HUMAN	K.L(+144.10)LEGEESR.L	N	38.05	1075.56	5.3	538.791	2	36.8	26955	14	394	401	iTRAQ 4plex (K N-term)
sp|P05787|K2C8_HUMAN	R.FLEQQNK(+144.10).M	Y	32.83	1049.56	-0.4	525.787	2	26.27	21757	9	111	117	iTRAQ 4plex (K N-term)
sp|P05787|K2C8_HUMAN	R.F(+144.10)LEQQNK(+144.10).M	Y	25.57	1193.66	-3.7	597.835	2	42.16	29590	13	111	117	iTRAQ 4plex (K N-term)
sp|P08729|K2C7_HUMAN	K.L(+144.10)LEGEESR.L	N	38.05	1075.56	5.3	538.791	2	36.8	26955	14	395	402	iTRAQ 4plex (K N-term)
sp|P08729|K2C7_HUMAN	R.FLEQQNK(+144.10).L	Y	32.83	1049.56	-0.4	525.787	2	26.27	21757	9	111	117	iTRAQ 4plex (K N-term)
sp|P08729|K2C7_HUMAN	R.F(+144.10)LEQQNK(+144.10).L	Y	25.57	1193.66	-3.7	597.835	2	42.16	29590	13	111	117	iTRAQ 4plex (K N-term)
sp|Q9NSB2|KRT84_HUMAN	R.L(+144.10)LEGEESR.L	N	38.05	1075.56	5.3	538.791	2	36.8	26955	14	468	475	iTRAQ 4plex (K N-term)
sp|Q9NSB2|KRT84_HUMAN	R.FLEQQNK(+144.10).L	Y	32.83	1049.56	-0.4	525.787	2	26.27	21757	9	185	191	iTRAQ 4plex (K N-term)
sp|Q9NSB2|KRT84_HUMAN	R.F(+144.10)LEQQNK(+144.10).L	Y	25.57	1193.66	-3.7	597.835	2	42.16	29590	13	185	191	iTRAQ 4plex (K N-term)
tr|F8W835|F8W835_HUMAN	K.N(+144.10)LQEAEEWYK(+144.10).S	Y	55.68	1596.8	-14.7	799.395	2	80.75	48664	18	166	175	iTRAQ 4plex (K N-term)
tr|F8W835|F8W835_HUMAN	K.N(+144.10)LQEAEEWY(+144.10)K(+144.10).S	Y	37.32	1740.9	7	581.311	3	72.83	44743	4	166	175	iTRAQ 4plex (K N-term); iTRAQ 4plex (Y)
sp|P07196|NFL_HUMAN	K.E(+144.10)YQDLLNVK(+144.10).M	Y	67.1	1408.78	-7.6	705.39	2	90.16	53317	16	371	379	iTRAQ 4plex (K N-term)
sp|P07196|NFL_HUMAN	K.E(+144.10)Y(+144.10)QDLLNVK(+144.10).M	Y	42.15	1552.88	-11.8	777.436	2	79.09	47839	9	371	379	iTRAQ 4plex (K N-term); iTRAQ 4plex (Y)
tr|A0A087WYG8|A0A087WYG8_HUMAN	R.E(+144.10)YQDLLNVK(+144.10).M	Y	67.1	1408.78	-7.6	705.39	2	90.16	53317	16	375	383	iTRAQ 4plex (K N-term)
tr|A0A087WYG8|A0A087WYG8_HUMAN	R.E(+144.10)Y(+144.10)QDLLNVK(+144.10).M	Y	42.15	1552.88	-11.8	777.436	2	79.09	47839	9	375	383	iTRAQ 4plex (K N-term); iTRAQ 4plex (Y)
sp|Q16352|AINX_HUMAN	R.E(+144.10)YQDLLNVK(+144.10).M	Y	67.1	1408.78	-7.6	705.39	2	90.16	53317	16	378	386	iTRAQ 4plex (K N-term)
sp|Q16352|AINX_HUMAN	R.E(+144.10)Y(+144.10)QDLLNVK(+144.10).M	Y	42.15	1552.88	-11.8	777.436	2	79.09	47839	9	378	386	iTRAQ 4plex (K N-term); iTRAQ 4plex (Y)
tr|E7ESP9|E7ESP9_HUMAN	R.E(+144.10)YQDLLNVK(+144.10).M	Y	67.1	1408.78	-7.6	705.39	2	90.16	53317	16	383	391	iTRAQ 4plex (K N-term)
tr|E7ESP9|E7ESP9_HUMAN	R.E(+144.10)Y(+144.10)QDLLNVK(+144.10).M	Y	42.15	1552.88	-11.8	777.436	2	79.09	47839	9	383	391	iTRAQ 4plex (K N-term); iTRAQ 4plex (Y)
sp|P07197|NFM_HUMAN	R.E(+144.10)YQDLLNVK(+144.10).M	Y	67.1	1408.78	-7.6	705.39	2	90.16	53317	16	383	391	iTRAQ 4plex (K N-term)
sp|P07197|NFM_HUMAN	R.E(+144.10)Y(+144.10)QDLLNVK(+144.10).M	Y	42.15	1552.88	-11.8	777.436	2	79.09	47839	9	383	391	iTRAQ 4plex (K N-term); iTRAQ 4plex (Y)
tr|E7EMV2|E7EMV2_HUMAN	R.E(+144.10)YQDLLNVK(+144.10).M	Y	67.1	1408.78	-7.6	705.39	2	90.16	53317	16	383	391	iTRAQ 4plex (K N-term)
tr|E7EMV2|E7EMV2_HUMAN	R.E(+144.10)Y(+144.10)QDLLNVK(+144.10).M	Y	42.15	1552.88	-11.8	777.436	2	79.09	47839	9	383	391	iTRAQ 4plex (K N-term); iTRAQ 4plex (Y)
sp|P12036|NFH_HUMAN	R.E(+144.10)YQDLLNVK(+144.10).M	Y	67.1	1408.78	-7.6	705.39	2	90.16	53317	16	384	392	iTRAQ 4plex (K N-term)
sp|P12036|NFH_HUMAN	R.E(+144.10)Y(+144.10)QDLLNVK(+144.10).M	Y	42.15	1552.88	-11.8	777.436	2	79.09	47839	9	384	392	iTRAQ 4plex (K N-term); iTRAQ 4plex (Y)
tr|K7ELP4|K7ELP4_HUMAN	R.FLEQQNK(+144.10).A	Y	32.83	1049.56	-0.4	525.787	2	26.27	21757	9	89	95	iTRAQ 4plex (K N-term)
tr|K7ELP4|K7ELP4_HUMAN	R.F(+144.10)LEQQNK(+144.10).A	Y	25.57	1193.66	-3.7	597.835	2	42.16	29590	13	89	95	iTRAQ 4plex (K N-term)
tr|K7EKH9|K7EKH9_HUMAN	R.FLEQQNK(+144.10).A	Y	32.83	1049.56	-0.4	525.787	2	26.27	21757	9	89	95	iTRAQ 4plex (K N-term)
tr|K7EKH9|K7EKH9_HUMAN	R.F(+144.10)LEQQNK(+144.10).A	Y	25.57	1193.66	-3.7	597.835	2	42.16	29590	13	89	95	iTRAQ 4plex (K N-term)
tr|U3KPR1|U3KPR1_HUMAN	R.FLEQQNK(+144.10).L	Y	32.83	1049.56	-0.4	525.787	2	26.27	21757	9	126	132	iTRAQ 4plex (K N-term)
tr|U3KPR1|U3KPR1_HUMAN	R.F(+144.10)LEQQNK(+144.10).L	Y	25.57	1193.66	-3.7	597.835	2	42.16	29590	13	126	132	iTRAQ 4plex (K N-term)
tr|F8W0C6|F8W0C6_HUMAN	R.FLEQQNK(+144.10).V	Y	32.83	1049.56	-0.4	525.787	2	26.27	21757	9	78	84	iTRAQ 4plex (K N-term)
tr|F8W0C6|F8W0C6_HUMAN	R.F(+144.10)LEQQNK(+144.10).V	Y	25.57	1193.66	-3.7	597.835	2	42.16	29590	13	78	84	iTRAQ 4plex (K N-term)
tr|F8VUG2|F8VUG2_HUMAN	R.FLEQQNK(+144.10).M	Y	32.83	1049.56	-0.4	525.787	2	26.27	21757	9	111	117	iTRAQ 4plex (K N-term)
tr|F8VUG2|F8VUG2_HUMAN	R.F(+144.10)LEQQNK(+144.10).M	Y	25.57	1193.66	-3.7	597.835	2	42.16	29590	13	111	117	iTRAQ 4plex (K N-term)
tr|F8W1U3|F8W1U3_HUMAN	R.FLEQQNK(+144.10).M	Y	32.83	1049.56	-0.4	525.787	2	26.27	21757	9	151	157	iTRAQ 4plex (K N-term)
tr|F8W1U3|F8W1U3_HUMAN	R.F(+144.10)LEQQNK(+144.10).M	Y	25.57	1193.66	-3.7	597.835	2	42.16	29590	13	151	157	iTRAQ 4plex (K N-term)
sp|Q8N1N4|K2C78_HUMAN	R.FLEQQNK(+144.10).V	Y	32.83	1049.56	-0.4	525.787	2	26.27	21757	9	131	137	iTRAQ 4plex (K N-term)
sp|Q8N1N4|K2C78_HUMAN	R.F(+144.10)LEQQNK(+144.10).V	Y	25.57	1193.66	-3.7	597.835	2	42.16	29590	13	131	137	iTRAQ 4plex (K N-term)
sp|P19013|K2C4_HUMAN	Q.FLEQQNK(+144.10).V	Y	32.83	1049.56	-0.4	525.787	2	26.27	21757	9	171	177	iTRAQ 4plex (K N-term)
sp|P19013|K2C4_HUMAN	Q.F(+144.10)LEQQNK(+144.10).V	Y	25.57	1193.66	-3.7	597.835	2	42.16	29590	13	171	177	iTRAQ 4plex (K N-term)
tr|A0A087X106|A0A087X106_HUMAN	R.FLEQQNK(+144.10).L	Y	32.83	1049.56	-0.4	525.787	2	26.27	21757	9	126	132	iTRAQ 4plex (K N-term)
tr|A0A087X106|A0A087X106_HUMAN	R.F(+144.10)LEQQNK(+144.10).L	Y	25.57	1193.66	-3.7	597.835	2	42.16	29590	13	126	132	iTRAQ 4plex (K N-term)
sp|O43790|KRT86_HUMAN	R.FLEQQNK(+144.10).L	Y	32.83	1049.56	-0.4	525.787	2	26.27	21757	9	126	132	iTRAQ 4plex (K N-term)
sp|O43790|KRT86_HUMAN	R.F(+144.10)LEQQNK(+144.10).L	Y	25.57	1193.66	-3.7	597.835	2	42.16	29590	13	126	132	iTRAQ 4plex (K N-term)
sp|P78385|KRT83_HUMAN	R.FLEQQNK(+144.10).L	Y	32.83	1049.56	-0.4	525.787	2	26.27	21757	9	131	137	iTRAQ 4plex (K N-term)
sp|P78385|KRT83_HUMAN	R.F(+144.10)LEQQNK(+144.10).L	Y	25.57	1193.66	-3.7	597.835	2	42.16	29590	13	131	137	iTRAQ 4plex (K N-term)
sp|Q14533|KRT81_HUMAN	R.FLEQQNK(+144.10).L	Y	32.83	1049.56	-0.4	525.787	2	26.27	21757	9	126	132	iTRAQ 4plex (K N-term)
sp|Q14533|KRT81_HUMAN	R.F(+144.10)LEQQNK(+144.10).L	Y	25.57	1193.66	-3.7	597.835	2	42.16	29590	13	126	132	iTRAQ 4plex (K N-term)
sp|P78386|KRT85_HUMAN	R.FLEQQNK(+144.10).L	Y	32.83	1049.56	-0.4	525.787	2	26.27	21757	9	143	149	iTRAQ 4plex (K N-term)
sp|P78386|KRT85_HUMAN	R.F(+144.10)LEQQNK(+144.10).L	Y	25.57	1193.66	-3.7	597.835	2	42.16	29590	13	143	149	iTRAQ 4plex (K N-term)
sp|O95678|K2C75_HUMAN	R.FLEQQNK(+144.10).V	Y	32.83	1049.56	-0.4	525.787	2	26.27	21757	9	169	175	iTRAQ 4plex (K N-term)
sp|O95678|K2C75_HUMAN	R.F(+144.10)LEQQNK(+144.10).V	Y	25.57	1193.66	-3.7	597.835	2	42.16	29590	13	169	175	iTRAQ 4plex (K N-term)
sp|Q5XKE5|K2C79_HUMAN	R.FLEQQNK(+144.10).V	Y	32.83	1049.56	-0.4	525.787	2	26.27	21757	9	162	168	iTRAQ 4plex (K N-term)
sp|Q5XKE5|K2C79_HUMAN	R.F(+144.10)LEQQNK(+144.10).V	Y	25.57	1193.66	-3.7	597.835	2	42.16	29590	13	162	168	iTRAQ 4plex (K N-term)
sp|P02538|K2C6A_HUMAN	R.FLEQQNK(+144.10).V	Y	32.83	1049.56	-0.4	525.787	2	26.27	21757	9	183	189	iTRAQ 4plex (K N-term)
sp|P02538|K2C6A_HUMAN	R.F(+144.10)LEQQNK(+144.10).V	Y	25.57	1193.66	-3.7	597.835	2	42.16	29590	13	183	189	iTRAQ 4plex (K N-term)
sp|P48668|K2C6C_HUMAN	R.FLEQQNK(+144.10).V	Y	32.83	1049.56	-0.4	525.787	2	26.27	21757	9	183	189	iTRAQ 4plex (K N-term)
sp|P48668|K2C6C_HUMAN	R.F(+144.10)LEQQNK(+144.10).V	Y	25.57	1193.66	-3.7	597.835	2	42.16	29590	13	183	189	iTRAQ 4plex (K N-term)
sp|P04259|K2C6B_HUMAN	R.FLEQQNK(+144.10).V	Y	32.83	1049.56	-0.4	525.787	2	26.27	21757	9	183	189	iTRAQ 4plex (K N-term)
sp|P04259|K2C6B_HUMAN	R.F(+144.10)LEQQNK(+144.10).V	Y	25.57	1193.66	-3.7	597.835	2	42.16	29590	13	183	189	iTRAQ 4plex (K N-term)
sp|P12035|K2C3_HUMAN	R.FLEQQNK(+144.10).V	Y	32.83	1049.56	-0.4	525.787	2	26.27	21757	9	218	224	iTRAQ 4plex (K N-term)
sp|P12035|K2C3_HUMAN	R.F(+144.10)LEQQNK(+144.10).V	Y	25.57	1193.66	-3.7	597.835	2	42.16	29590	13	218	224	iTRAQ 4plex (K N-term)
sp|Q01546|K22O_HUMAN	R.FLEQQNK(+144.10).V	Y	32.83	1049.56	-0.4	525.787	2	26.27	21757	9	203	209	iTRAQ 4plex (K N-term)
sp|Q01546|K22O_HUMAN	R.F(+144.10)LEQQNK(+144.10).V	Y	25.57	1193.66	-3.7	597.835	2	42.16	29590	13	203	209	iTRAQ 4plex (K N-term)
tr|Q8IWY7|Q8IWY7_HUMAN	R.FLEQQNK(+144.10).M	Y	32.83	1049.56	-0.4	525.787	2	26.27	21757	9	363	369	iTRAQ 4plex (K N-term)
tr|Q8IWY7|Q8IWY7_HUMAN	R.F(+144.10)LEQQNK(+144.10).M	Y	25.57	1193.66	-3.7	597.835	2	42.16	29590	13	363	369	iTRAQ 4plex (K N-term)
sp|P11142|HSP7C_HUMAN	K.S(+144.10)INPDEAVAYGAAVQAAILSGDK(+144.10).S	Y	75.14	2547.34	-17.2	850.105	3	158.2	87084	1	362	384	iTRAQ 4plex (K N-term)
sp|P11142|HSP7C_HUMAN	K.T(+144.10)VTNAVVTVPAYFNDSQR.Q	Y	73.76	2125.09	-9.8	709.364	3	114.03	65120	8	138	155	iTRAQ 4plex (K N-term)
sp|P11142|HSP7C_HUMAN	K.SFY(+144.10)PEEVSSMVLTK(+144.10).M	Y	73.63	1903.98	-2.4	635.666	3	127.77	71958	1	113	126	iTRAQ 4plex (Y); iTRAQ 4plex (K N-term)
sp|P11142|HSP7C_HUMAN	K.S(+144.10)FYPEEVSSMVLTK(+144.10).M	Y	73.27	1903.98	-0.8	635.667	3	127.54	71848	8	113	126	iTRAQ 4plex (K N-term)
sp|P11142|HSP7C_HUMAN	R.T(+144.10)TPSYVAFTDTER.L	N	70.91	1630.79	-19.4	816.388	2	77.04	46827	16	37	49	iTRAQ 4plex (K N-term)
sp|P11142|HSP7C_HUMAN	K.S(+144.10)QIHDIVLVGGSTR.I	Y	69.77	1624.9	5.3	542.643	3	78.57	47583	13	329	342	iTRAQ 4plex (K N-term)
sp|P11142|HSP7C_HUMAN	K.N(+144.10)QVAMNPTNTVFDAK(+144.10).R	Y	69.67	1936.99	-3.2	646.668	3	89.84	53161	3	57	71	iTRAQ 4plex (K N-term)
sp|P11142|HSP7C_HUMAN	K.D(+144.10)AGTIAGLNVLR.I	Y	65.6	1342.77	-5.2	672.387	2	101.39	58860	15	160	171	iTRAQ 4plex (K N-term)
sp|P11142|HSP7C_HUMAN	K.N(+144.10)SLESYAFNMK(+144.10).A	Y	65.45	1590.79	10	531.276	3	97.63	57012	11	540	550	iTRAQ 4plex (K N-term)
sp|P11142|HSP7C_HUMAN	R.F(+144.10)EELNADLFR.G	Y	63.63	1396.71	-6	699.357	2	118.77	67470	11	302	311	iTRAQ 4plex (K N-term)
sp|P11142|HSP7C_HUMAN	K.H(+144.10)WPFMVVNDAGRPK(+144.10).V	Y	61.77	1941.02	16.3	486.271	4	99.66	58011	10	89	102	iTRAQ 4plex (K N-term)
sp|P11142|HSP7C_HUMAN	R.G(+144.10)VPQIEVTFDIDAN(+.98)GILNVSAVDK(+144.10).S	Y	61.04	2802.49	-20.1	935.15	3	171.07	93422	2	470	493	iTRAQ 4plex (K N-term); Deamidation (NQ)
sp|P11142|HSP7C_HUMAN	R.G(+144.10)VPQIEVTFDIDANGILNVSAVDK(+144.10).S	Y	60.17	2801.5	-27.3	934.816	3	171.02	93401	3	470	493	iTRAQ 4plex (K N-term)
sp|P11142|HSP7C_HUMAN	K.E(+144.10)IAEAYLGK(+144.10).T	Y	58.25	1280.72	-2.6	641.365	2	74.49	45560	10	129	137	iTRAQ 4plex (K N-term)
sp|P11142|HSP7C_HUMAN	K.S(+144.10)TAGDTHLGGEDFDNR.M	Y	55.68	1834.82	-6	612.61	3	45.68	31327	1	221	236	iTRAQ 4plex (K N-term)
sp|P11142|HSP7C_HUMAN	K.V(+144.10)EIIANDQGNR.T	N	55.6	1371.72	-8.6	686.862	2	53.35	35112	13	26	36	iTRAQ 4plex (K N-term)
sp|P11142|HSP7C_HUMAN	R.I(+144.10)INEPTAAAIAYGLDK(+144.10)K(+144.10).V	Y	54.64	2219.28	0.4	555.828	4	120.83	68499	2	172	188	iTRAQ 4plex (K N-term)
sp|P11142|HSP7C_HUMAN	K.NSLESYAFNMK(+144.10).A	Y	52.71	1446.69	-8.6	724.347	2	92.94	54690	2	540	550	iTRAQ 4plex (K N-term)
sp|P11142|HSP7C_HUMAN	R.T(+144.10)LSSSTQASIEIDSLYEGIDFYTSITR.A	Y	51.37	3140.55	-31.2	1047.82	3	174.52	95127	1	273	299	iTRAQ 4plex (K N-term)
sp|P11142|HSP7C_HUMAN	R.R(+144.10)FDDAVVQSDMK(+144.10).H	Y	50.83	1697.86	1.2	566.962	3	64.69	40710	4	77	88	iTRAQ 4plex (K N-term)
sp|P11142|HSP7C_HUMAN	R.FEELNADLFR.G	Y	44.57	1252.61	3.6	627.314	2	106.8	61533	1	302	311
sp|P11142|HSP7C_HUMAN	K.M(+144.10)K(+144.10)EIAEAYLGK(+144.10).T	Y	43.51	1683.95	7.3	562.329	3	99.51	57937	3	127	137	iTRAQ 4plex (K N-term)
sp|P11142|HSP7C_HUMAN	R.M(+144.10)VNHFIAEFK(+144.10).R	Y	43.41	1522.82	13.3	508.62	3	108.38	62318	3	237	246	iTRAQ 4plex (K N-term)
sp|P11142|HSP7C_HUMAN	K.L(+144.10)DK(+144.10)SQIHDIVLVGGSTR.I	Y	42.39	2125.21	5.4	532.312	4	100.3	58328	3	326	342	iTRAQ 4plex (K N-term)
sp|P11142|HSP7C_HUMAN	R.F(+144.10)DDAVVQSDMK(+144.10).H	Y	41.94	1541.76	11.9	514.933	3	74.63	45625	1	78	88	iTRAQ 4plex (K N-term)
sp|P11142|HSP7C_HUMAN	K.V(+144.10)QVEY(+144.10)KGETK(+144.10).S	Y	35.26	1611.91	3	538.313	3	47.06	32006	3	103	112	iTRAQ 4plex (K N-term); iTRAQ 4plex (Y)
sp|P11142|HSP7C_HUMAN	R.G(+144.10)TLDPVEK(+144.10).A	Y	34.85	1145.65	-0.9	573.832	2	47.08	32021	6	312	319	iTRAQ 4plex (K N-term)
sp|P11142|HSP7C_HUMAN	R.N(+144.10)TTIPTK(+144.10).Q	N	32.58	1061.63	4.5	531.824	2	34.24	25694	6	417	423	iTRAQ 4plex (K N-term)
sp|P11142|HSP7C_HUMAN	K.I(+144.10)TITNDK(+144.10).G	N	31.87	1091.64	4	546.829	2	48.68	32799	9	501	507	iTRAQ 4plex (K N-term)
sp|P11142|HSP7C_HUMAN	K.D(+144.10)NNLLGK(+144.10).F	Y	30.71	1060.61	0.9	531.312	2	41.94	29478	11	452	458	iTRAQ 4plex (K N-term)
sp|P11142|HSP7C_HUMAN	R.M(+144.10)VQEAEK(+144.10).Y	Y	29.72	1121.6	-2	561.804	2	28.93	23067	3	518	524	iTRAQ 4plex (K N-term)
sp|P11142|HSP7C_HUMAN	R.L(+144.10)IGDAAK(+144.10).N	N	29.31	974.596	-5.2	488.303	2	44.01	30502	16	50	56	iTRAQ 4plex (K N-term)
sp|P11142|HSP7C_HUMAN	K.V(+144.10)QVEYK(+144.10)GETK(+144.10).S	Y	24.92	1611.91	19.8	403.994	4	47.03	31992	2	103	112	iTRAQ 4plex (K N-term)
sp|P11142|HSP7C_HUMAN	K.V(+144.10)QVEYK(+144.10).G	Y	23.86	1052.61	6.2	527.314	2	44.74	30864	5	103	108	iTRAQ 4plex (K N-term)
tr|E9PKE3|E9PKE3_HUMAN	K.S(+144.10)INPDEAVAYGAAVQAAILSGDK(+144.10).S	Y	75.14	2547.34	-17.2	850.105	3	158.2	87084	1	343	365	iTRAQ 4plex (K N-term)
tr|E9PKE3|E9PKE3_HUMAN	K.SFY(+144.10)PEEVSSMVLTK(+144.10).M	Y	73.63	1903.98	-2.4	635.666	3	127.77	71958	1	113	126	iTRAQ 4plex (Y); iTRAQ 4plex (K N-term)
tr|E9PKE3|E9PKE3_HUMAN	K.S(+144.10)FYPEEVSSMVLTK(+144.10).M	Y	73.27	1903.98	-0.8	635.667	3	127.54	71848	8	113	126	iTRAQ 4plex (K N-term)
tr|E9PKE3|E9PKE3_HUMAN	R.T(+144.10)TPSYVAFTDTER.L	N	70.91	1630.79	-19.4	816.388	2	77.04	46827	16	37	49	iTRAQ 4plex (K N-term)
tr|E9PKE3|E9PKE3_HUMAN	K.S(+144.10)QIHDIVLVGGSTR.I	Y	69.77	1624.9	5.3	542.643	3	78.57	47583	13	310	323	iTRAQ 4plex (K N-term)
tr|E9PKE3|E9PKE3_HUMAN	K.N(+144.10)QVAMNPTNTVFDAK(+144.10).R	Y	69.67	1936.99	-3.2	646.668	3	89.84	53161	3	57	71	iTRAQ 4plex (K N-term)
tr|E9PKE3|E9PKE3_HUMAN	K.D(+144.10)AGTIAGLNVLR.I	Y	65.6	1342.77	-5.2	672.387	2	101.39	58860	15	141	152	iTRAQ 4plex (K N-term)
tr|E9PKE3|E9PKE3_HUMAN	K.N(+144.10)SLESYAFNMK(+144.10).A	Y	65.45	1590.79	10	531.276	3	97.63	57012	11	521	531	iTRAQ 4plex (K N-term)
tr|E9PKE3|E9PKE3_HUMAN	R.F(+144.10)EELNADLFR.G	Y	63.63	1396.71	-6	699.357	2	118.77	67470	11	283	292	iTRAQ 4plex (K N-term)
tr|E9PKE3|E9PKE3_HUMAN	K.H(+144.10)WPFMVVNDAGRPK(+144.10).V	Y	61.77	1941.02	16.3	486.271	4	99.66	58011	10	89	102	iTRAQ 4plex (K N-term)
tr|E9PKE3|E9PKE3_HUMAN	R.G(+144.10)VPQIEVTFDIDAN(+.98)GILNVSAVDK(+144.10).S	Y	61.04	2802.49	-20.1	935.15	3	171.07	93422	2	451	474	iTRAQ 4plex (K N-term); Deamidation (NQ)
tr|E9PKE3|E9PKE3_HUMAN	R.G(+144.10)VPQIEVTFDIDANGILNVSAVDK(+144.10).S	Y	60.17	2801.5	-27.3	934.816	3	171.02	93401	3	451	474	iTRAQ 4plex (K N-term)
tr|E9PKE3|E9PKE3_HUMAN	K.E(+144.10)IAEAYLGK(+144.10).A	Y	58.25	1280.72	-2.6	641.365	2	74.49	45560	10	129	137	iTRAQ 4plex (K N-term)
tr|E9PKE3|E9PKE3_HUMAN	K.S(+144.10)TAGDTHLGGEDFDNR.M	Y	55.68	1834.82	-6	612.61	3	45.68	31327	1	202	217	iTRAQ 4plex (K N-term)
tr|E9PKE3|E9PKE3_HUMAN	K.V(+144.10)EIIANDQGNR.T	N	55.6	1371.72	-8.6	686.862	2	53.35	35112	13	26	36	iTRAQ 4plex (K N-term)
tr|E9PKE3|E9PKE3_HUMAN	R.I(+144.10)INEPTAAAIAYGLDK(+144.10)K(+144.10).V	Y	54.64	2219.28	0.4	555.828	4	120.83	68499	2	153	169	iTRAQ 4plex (K N-term)
tr|E9PKE3|E9PKE3_HUMAN	K.NSLESYAFNMK(+144.10).A	Y	52.71	1446.69	-8.6	724.347	2	92.94	54690	2	521	531	iTRAQ 4plex (K N-term)
tr|E9PKE3|E9PKE3_HUMAN	R.T(+144.10)LSSSTQASIEIDSLYEGIDFYTSITR.A	Y	51.37	3140.55	-31.2	1047.82	3	174.52	95127	1	254	280	iTRAQ 4plex (K N-term)
tr|E9PKE3|E9PKE3_HUMAN	R.R(+144.10)FDDAVVQSDMK(+144.10).H	Y	50.83	1697.86	1.2	566.962	3	64.69	40710	4	77	88	iTRAQ 4plex (K N-term)
tr|E9PKE3|E9PKE3_HUMAN	R.FEELNADLFR.G	Y	44.57	1252.61	3.6	627.314	2	106.8	61533	1	283	292
tr|E9PKE3|E9PKE3_HUMAN	K.M(+144.10)K(+144.10)EIAEAYLGK(+144.10).A	Y	43.51	1683.95	7.3	562.329	3	99.51	57937	3	127	137	iTRAQ 4plex (K N-term)
tr|E9PKE3|E9PKE3_HUMAN	R.M(+144.10)VNHFIAEFK(+144.10).R	Y	43.41	1522.82	13.3	508.62	3	108.38	62318	3	218	227	iTRAQ 4plex (K N-term)
tr|E9PKE3|E9PKE3_HUMAN	K.L(+144.10)DK(+144.10)SQIHDIVLVGGSTR.I	Y	42.39	2125.21	5.4	532.312	4	100.3	58328	3	307	323	iTRAQ 4plex (K N-term)
tr|E9PKE3|E9PKE3_HUMAN	R.F(+144.10)DDAVVQSDMK(+144.10).H	Y	41.94	1541.76	11.9	514.933	3	74.63	45625	1	78	88	iTRAQ 4plex (K N-term)
tr|E9PKE3|E9PKE3_HUMAN	K.V(+144.10)QVEY(+144.10)KGETK(+144.10).S	Y	35.26	1611.91	3	538.313	3	47.06	32006	3	103	112	iTRAQ 4plex (K N-term); iTRAQ 4plex (Y)
tr|E9PKE3|E9PKE3_HUMAN	R.G(+144.10)TLDPVEK(+144.10).A	Y	34.85	1145.65	-0.9	573.832	2	47.08	32021	6	293	300	iTRAQ 4plex (K N-term)
tr|E9PKE3|E9PKE3_HUMAN	R.N(+144.10)TTIPTK(+144.10).Q	N	32.58	1061.63	4.5	531.824	2	34.24	25694	6	398	404	iTRAQ 4plex (K N-term)
tr|E9PKE3|E9PKE3_HUMAN	K.I(+144.10)TITNDK(+144.10).G	N	31.87	1091.64	4	546.829	2	48.68	32799	9	482	488	iTRAQ 4plex (K N-term)
tr|E9PKE3|E9PKE3_HUMAN	K.D(+144.10)NNLLGK(+144.10).F	Y	30.71	1060.61	0.9	531.312	2	41.94	29478	11	433	439	iTRAQ 4plex (K N-term)
tr|E9PKE3|E9PKE3_HUMAN	R.M(+144.10)VQEAEK(+144.10).Y	Y	29.72	1121.6	-2	561.804	2	28.93	23067	3	499	505	iTRAQ 4plex (K N-term)
tr|E9PKE3|E9PKE3_HUMAN	R.L(+144.10)IGDAAK(+144.10).N	N	29.31	974.596	-5.2	488.303	2	44.01	30502	16	50	56	iTRAQ 4plex (K N-term)
tr|E9PKE3|E9PKE3_HUMAN	K.V(+144.10)QVEYK(+144.10)GETK(+144.10).S	Y	24.92	1611.91	19.8	403.994	4	47.03	31992	2	103	112	iTRAQ 4plex (K N-term)
tr|E9PKE3|E9PKE3_HUMAN	K.V(+144.10)QVEYK(+144.10).G	Y	23.86	1052.61	6.2	527.314	2	44.74	30864	5	103	108	iTRAQ 4plex (K N-term)
tr|E9PNE6|E9PNE6_HUMAN	K.S(+144.10)INPDEAVAYGAAVQAAILSGDK(+144.10).S	Y	75.14	2547.34	-17.2	850.105	3	158.2	87084	1	216	238	iTRAQ 4plex (K N-term)
tr|E9PNE6|E9PNE6_HUMAN	R.T(+144.10)TPSYVAFTDTER.L	N	70.91	1630.79	-19.4	816.388	2	77.04	46827	16	37	49	iTRAQ 4plex (K N-term)
tr|E9PNE6|E9PNE6_HUMAN	K.S(+144.10)QIHDIVLVGGSTR.I	Y	69.77	1624.9	5.3	542.643	3	78.57	47583	13	183	196	iTRAQ 4plex (K N-term)
tr|E9PNE6|E9PNE6_HUMAN	K.N(+144.10)QVAMNPTNTVFDAK(+144.10).R	Y	69.67	1936.99	-3.2	646.668	3	89.84	53161	3	57	71	iTRAQ 4plex (K N-term)
tr|E9PNE6|E9PNE6_HUMAN	K.N(+144.10)SLESYAFNMK(+144.10).A	Y	65.45	1590.79	10	531.276	3	97.63	57012	11	394	404	iTRAQ 4plex (K N-term)
tr|E9PNE6|E9PNE6_HUMAN	R.F(+144.10)EELNADLFR.G	Y	63.63	1396.71	-6	699.357	2	118.77	67470	11	156	165	iTRAQ 4plex (K N-term)
tr|E9PNE6|E9PNE6_HUMAN	K.H(+144.10)WPFMVVNDAGRPK(+144.10).H	Y	61.77	1941.02	16.3	486.271	4	99.66	58011	10	89	102	iTRAQ 4plex (K N-term)
tr|E9PNE6|E9PNE6_HUMAN	R.G(+144.10)VPQIEVTFDIDAN(+.98)GILNVSAVDK(+144.10).S	Y	61.04	2802.49	-20.1	935.15	3	171.07	93422	2	324	347	iTRAQ 4plex (K N-term); Deamidation (NQ)
tr|E9PNE6|E9PNE6_HUMAN	R.G(+144.10)VPQIEVTFDIDANGILNVSAVDK(+144.10).S	Y	60.17	2801.5	-27.3	934.816	3	171.02	93401	3	324	347	iTRAQ 4plex (K N-term)
tr|E9PNE6|E9PNE6_HUMAN	K.V(+144.10)EIIANDQGNR.T	N	55.6	1371.72	-8.6	686.862	2	53.35	35112	13	26	36	iTRAQ 4plex (K N-term)
tr|E9PNE6|E9PNE6_HUMAN	K.NSLESYAFNMK(+144.10).A	Y	52.71	1446.69	-8.6	724.347	2	92.94	54690	2	394	404	iTRAQ 4plex (K N-term)
tr|E9PNE6|E9PNE6_HUMAN	R.T(+144.10)LSSSTQASIEIDSLYEGIDFYTSITR.A	Y	51.37	3140.55	-31.2	1047.82	3	174.52	95127	1	127	153	iTRAQ 4plex (K N-term)
tr|E9PNE6|E9PNE6_HUMAN	R.R(+144.10)FDDAVVQSDMK(+144.10).H	Y	50.83	1697.86	1.2	566.962	3	64.69	40710	4	77	88	iTRAQ 4plex (K N-term)
tr|E9PNE6|E9PNE6_HUMAN	R.FEELNADLFR.G	Y	44.57	1252.61	3.6	627.314	2	106.8	61533	1	156	165
tr|E9PNE6|E9PNE6_HUMAN	K.L(+144.10)DK(+144.10)SQIHDIVLVGGSTR.I	Y	42.39	2125.21	5.4	532.312	4	100.3	58328	3	180	196	iTRAQ 4plex (K N-term)
tr|E9PNE6|E9PNE6_HUMAN	R.F(+144.10)DDAVVQSDMK(+144.10).H	Y	41.94	1541.76	11.9	514.933	3	74.63	45625	1	78	88	iTRAQ 4plex (K N-term)
tr|E9PNE6|E9PNE6_HUMAN	R.G(+144.10)TLDPVEK(+144.10).A	Y	34.85	1145.65	-0.9	573.832	2	47.08	32021	6	166	173	iTRAQ 4plex (K N-term)
tr|E9PNE6|E9PNE6_HUMAN	R.N(+144.10)TTIPTK(+144.10).Q	N	32.58	1061.63	4.5	531.824	2	34.24	25694	6	271	277	iTRAQ 4plex (K N-term)
tr|E9PNE6|E9PNE6_HUMAN	K.I(+144.10)TITNDK(+144.10).G	N	31.87	1091.64	4	546.829	2	48.68	32799	9	355	361	iTRAQ 4plex (K N-term)
tr|E9PNE6|E9PNE6_HUMAN	K.D(+144.10)NNLLGK(+144.10).F	Y	30.71	1060.61	0.9	531.312	2	41.94	29478	11	306	312	iTRAQ 4plex (K N-term)
tr|E9PNE6|E9PNE6_HUMAN	R.M(+144.10)VQEAEK(+144.10).Y	Y	29.72	1121.6	-2	561.804	2	28.93	23067	3	372	378	iTRAQ 4plex (K N-term)
tr|E9PNE6|E9PNE6_HUMAN	R.L(+144.10)IGDAAK(+144.10).N	N	29.31	974.596	-5.2	488.303	2	44.01	30502	16	50	56	iTRAQ 4plex (K N-term)
tr|E9PN89|E9PN89_HUMAN	K.T(+144.10)VTNAVVTVPAYFNDSQR.Q	Y	73.76	2125.09	-9.8	709.364	3	114.03	65120	8	78	95	iTRAQ 4plex (K N-term)
tr|E9PN89|E9PN89_HUMAN	K.SFY(+144.10)PEEVSSMVLTK(+144.10).M	Y	73.63	1903.98	-2.4	635.666	3	127.77	71958	1	53	66	iTRAQ 4plex (Y); iTRAQ 4plex (K N-term)
tr|E9PN89|E9PN89_HUMAN	K.S(+144.10)FYPEEVSSMVLTK(+144.10).M	Y	73.27	1903.98	-0.8	635.667	3	127.54	71848	8	53	66	iTRAQ 4plex (K N-term)
tr|E9PN89|E9PN89_HUMAN	K.S(+144.10)QIHDIVLVGGSTR.I	Y	69.77	1624.9	5.3	542.643	3	78.57	47583	13	269	282	iTRAQ 4plex (K N-term)
tr|E9PN89|E9PN89_HUMAN	K.D(+144.10)AGTIAGLNVLR.I	Y	65.6	1342.77	-5.2	672.387	2	101.39	58860	15	100	111	iTRAQ 4plex (K N-term)
tr|E9PN89|E9PN89_HUMAN	R.F(+144.10)EELNADLFR.G	Y	63.63	1396.71	-6	699.357	2	118.77	67470	11	242	251	iTRAQ 4plex (K N-term)
tr|E9PN89|E9PN89_HUMAN	K.H(+144.10)WPFMVVNDAGRPK(+144.10).V	Y	61.77	1941.02	16.3	486.271	4	99.66	58011	10	29	42	iTRAQ 4plex (K N-term)
tr|E9PN89|E9PN89_HUMAN	K.E(+144.10)IAEAYLGK(+144.10).T	Y	58.25	1280.72	-2.6	641.365	2	74.49	45560	10	69	77	iTRAQ 4plex (K N-term)
tr|E9PN89|E9PN89_HUMAN	K.S(+144.10)TAGDTHLGGEDFDNR.M	Y	55.68	1834.82	-6	612.61	3	45.68	31327	1	161	176	iTRAQ 4plex (K N-term)
tr|E9PN89|E9PN89_HUMAN	R.I(+144.10)INEPTAAAIAYGLDK(+144.10)K(+144.10).V	Y	54.64	2219.28	0.4	555.828	4	120.83	68499	2	112	128	iTRAQ 4plex (K N-term)
tr|E9PN89|E9PN89_HUMAN	R.T(+144.10)LSSSTQASIEIDSLYEGIDFYTSITR.A	Y	51.37	3140.55	-31.2	1047.82	3	174.52	95127	1	213	239	iTRAQ 4plex (K N-term)
tr|E9PN89|E9PN89_HUMAN	R.R(+144.10)FDDAVVQSDMK(+144.10).H	Y	50.83	1697.86	1.2	566.962	3	64.69	40710	4	17	28	iTRAQ 4plex (K N-term)
tr|E9PN89|E9PN89_HUMAN	R.FEELNADLFR.G	Y	44.57	1252.61	3.6	627.314	2	106.8	61533	1	242	251
tr|E9PN89|E9PN89_HUMAN	K.M(+144.10)K(+144.10)EIAEAYLGK(+144.10).T	Y	43.51	1683.95	7.3	562.329	3	99.51	57937	3	67	77	iTRAQ 4plex (K N-term)
tr|E9PN89|E9PN89_HUMAN	R.M(+144.10)VNHFIAEFK(+144.10).R	Y	43.41	1522.82	13.3	508.62	3	108.38	62318	3	177	186	iTRAQ 4plex (K N-term)
tr|E9PN89|E9PN89_HUMAN	K.L(+144.10)DK(+144.10)SQIHDIVLVGGSTR.I	Y	42.39	2125.21	5.4	532.312	4	100.3	58328	3	266	282	iTRAQ 4plex (K N-term)
tr|E9PN89|E9PN89_HUMAN	R.F(+144.10)DDAVVQSDMK(+144.10).H	Y	41.94	1541.76	11.9	514.933	3	74.63	45625	1	18	28	iTRAQ 4plex (K N-term)
tr|E9PN89|E9PN89_HUMAN	K.V(+144.10)QVEY(+144.10)KGETK(+144.10).S	Y	35.26	1611.91	3	538.313	3	47.06	32006	3	43	52	iTRAQ 4plex (K N-term); iTRAQ 4plex (Y)
tr|E9PN89|E9PN89_HUMAN	R.G(+144.10)TLDPVEK(+144.10).A	Y	34.85	1145.65	-0.9	573.832	2	47.08	32021	6	252	259	iTRAQ 4plex (K N-term)
tr|E9PN89|E9PN89_HUMAN	K.V(+144.10)QVEYK(+144.10)GETK(+144.10).S	Y	24.92	1611.91	19.8	403.994	4	47.03	31992	2	43	52	iTRAQ 4plex (K N-term)
tr|E9PN89|E9PN89_HUMAN	K.V(+144.10)QVEYK(+144.10).G	Y	23.86	1052.61	6.2	527.314	2	44.74	30864	5	43	48	iTRAQ 4plex (K N-term)
tr|E9PK54|E9PK54_HUMAN	K.T(+144.10)VTNAVVTVPAYFNDSQR.Q	Y	73.76	2125.09	-9.8	709.364	3	114.03	65120	8	138	155	iTRAQ 4plex (K N-term)
tr|E9PK54|E9PK54_HUMAN	K.SFY(+144.10)PEEVSSMVLTK(+144.10).M	Y	73.63	1903.98	-2.4	635.666	3	127.77	71958	1	113	126	iTRAQ 4plex (Y); iTRAQ 4plex (K N-term)
tr|E9PK54|E9PK54_HUMAN	K.S(+144.10)FYPEEVSSMVLTK(+144.10).M	Y	73.27	1903.98	-0.8	635.667	3	127.54	71848	8	113	126	iTRAQ 4plex (K N-term)
tr|E9PK54|E9PK54_HUMAN	R.T(+144.10)TPSYVAFTDTER.L	N	70.91	1630.79	-19.4	816.388	2	77.04	46827	16	37	49	iTRAQ 4plex (K N-term)
tr|E9PK54|E9PK54_HUMAN	K.N(+144.10)QVAMNPTNTVFDAK(+144.10).R	Y	69.67	1936.99	-3.2	646.668	3	89.84	53161	3	57	71	iTRAQ 4plex (K N-term)
tr|E9PK54|E9PK54_HUMAN	K.D(+144.10)AGTIAGLNVLR.I	Y	65.6	1342.77	-5.2	672.387	2	101.39	58860	15	160	171	iTRAQ 4plex (K N-term)
tr|E9PK54|E9PK54_HUMAN	K.H(+144.10)WPFMVVNDAGRPK(+144.10).V	Y	61.77	1941.02	16.3	486.271	4	99.66	58011	10	89	102	iTRAQ 4plex (K N-term)
tr|E9PK54|E9PK54_HUMAN	K.E(+144.10)IAEAYLGK(+144.10).T	Y	58.25	1280.72	-2.6	641.365	2	74.49	45560	10	129	137	iTRAQ 4plex (K N-term)
tr|E9PK54|E9PK54_HUMAN	K.V(+144.10)EIIANDQGNR.T	N	55.6	1371.72	-8.6	686.862	2	53.35	35112	13	26	36	iTRAQ 4plex (K N-term)
tr|E9PK54|E9PK54_HUMAN	R.R(+144.10)FDDAVVQSDMK(+144.10).H	Y	50.83	1697.86	1.2	566.962	3	64.69	40710	4	77	88	iTRAQ 4plex (K N-term)
tr|E9PK54|E9PK54_HUMAN	K.M(+144.10)K(+144.10)EIAEAYLGK(+144.10).T	Y	43.51	1683.95	7.3	562.329	3	99.51	57937	3	127	137	iTRAQ 4plex (K N-term)
tr|E9PK54|E9PK54_HUMAN	R.F(+144.10)DDAVVQSDMK(+144.10).H	Y	41.94	1541.76	11.9	514.933	3	74.63	45625	1	78	88	iTRAQ 4plex (K N-term)
tr|E9PK54|E9PK54_HUMAN	K.V(+144.10)QVEY(+144.10)KGETK(+144.10).S	Y	35.26	1611.91	3	538.313	3	47.06	32006	3	103	112	iTRAQ 4plex (K N-term); iTRAQ 4plex (Y)
tr|E9PK54|E9PK54_HUMAN	R.L(+144.10)IGDAAK(+144.10).N	N	29.31	974.596	-5.2	488.303	2	44.01	30502	16	50	56	iTRAQ 4plex (K N-term)
tr|E9PK54|E9PK54_HUMAN	K.V(+144.10)QVEYK(+144.10)GETK(+144.10).S	Y	24.92	1611.91	19.8	403.994	4	47.03	31992	2	103	112	iTRAQ 4plex (K N-term)
tr|E9PK54|E9PK54_HUMAN	K.V(+144.10)QVEYK(+144.10).G	Y	23.86	1052.61	6.2	527.314	2	44.74	30864	5	103	108	iTRAQ 4plex (K N-term)
tr|E9PQQ4|E9PQQ4_HUMAN	K.T(+144.10)VTNAVVTVPAYFNDSQR.Q	Y	73.76	2125.09	-9.8	709.364	3	114.03	65120	8	138	155	iTRAQ 4plex (K N-term)
tr|E9PQQ4|E9PQQ4_HUMAN	K.SFY(+144.10)PEEVSSMVLTK(+144.10).M	Y	73.63	1903.98	-2.4	635.666	3	127.77	71958	1	113	126	iTRAQ 4plex (Y); iTRAQ 4plex (K N-term)
tr|E9PQQ4|E9PQQ4_HUMAN	K.S(+144.10)FYPEEVSSMVLTK(+144.10).M	Y	73.27	1903.98	-0.8	635.667	3	127.54	71848	8	113	126	iTRAQ 4plex (K N-term)
tr|E9PQQ4|E9PQQ4_HUMAN	R.T(+144.10)TPSYVAFTDTER.L	N	70.91	1630.79	-19.4	816.388	2	77.04	46827	16	37	49	iTRAQ 4plex (K N-term)
tr|E9PQQ4|E9PQQ4_HUMAN	K.N(+144.10)QVAMNPTNTVFDAK(+144.10).R	Y	69.67	1936.99	-3.2	646.668	3	89.84	53161	3	57	71	iTRAQ 4plex (K N-term)
tr|E9PQQ4|E9PQQ4_HUMAN	K.D(+144.10)AGTIAGLNVLR	Y	65.6	1342.77	-5.2	672.387	2	101.39	58860	15	160	171	iTRAQ 4plex (K N-term)
tr|E9PQQ4|E9PQQ4_HUMAN	K.H(+144.10)WPFMVVNDAGRPK(+144.10).V	Y	61.77	1941.02	16.3	486.271	4	99.66	58011	10	89	102	iTRAQ 4plex (K N-term)
tr|E9PQQ4|E9PQQ4_HUMAN	K.E(+144.10)IAEAYLGK(+144.10).T	Y	58.25	1280.72	-2.6	641.365	2	74.49	45560	10	129	137	iTRAQ 4plex (K N-term)
tr|E9PQQ4|E9PQQ4_HUMAN	K.V(+144.10)EIIANDQGNR.T	N	55.6	1371.72	-8.6	686.862	2	53.35	35112	13	26	36	iTRAQ 4plex (K N-term)
tr|E9PQQ4|E9PQQ4_HUMAN	R.R(+144.10)FDDAVVQSDMK(+144.10).H	Y	50.83	1697.86	1.2	566.962	3	64.69	40710	4	77	88	iTRAQ 4plex (K N-term)
tr|E9PQQ4|E9PQQ4_HUMAN	K.M(+144.10)K(+144.10)EIAEAYLGK(+144.10).T	Y	43.51	1683.95	7.3	562.329	3	99.51	57937	3	127	137	iTRAQ 4plex (K N-term)
tr|E9PQQ4|E9PQQ4_HUMAN	R.F(+144.10)DDAVVQSDMK(+144.10).H	Y	41.94	1541.76	11.9	514.933	3	74.63	45625	1	78	88	iTRAQ 4plex (K N-term)
tr|E9PQQ4|E9PQQ4_HUMAN	K.V(+144.10)QVEY(+144.10)KGETK(+144.10).S	Y	35.26	1611.91	3	538.313	3	47.06	32006	3	103	112	iTRAQ 4plex (K N-term); iTRAQ 4plex (Y)
tr|E9PQQ4|E9PQQ4_HUMAN	R.L(+144.10)IGDAAK(+144.10).N	N	29.31	974.596	-5.2	488.303	2	44.01	30502	16	50	56	iTRAQ 4plex (K N-term)
tr|E9PQQ4|E9PQQ4_HUMAN	K.V(+144.10)QVEYK(+144.10)GETK(+144.10).S	Y	24.92	1611.91	19.8	403.994	4	47.03	31992	2	103	112	iTRAQ 4plex (K N-term)
tr|E9PQQ4|E9PQQ4_HUMAN	K.V(+144.10)QVEYK(+144.10).G	Y	23.86	1052.61	6.2	527.314	2	44.74	30864	5	103	108	iTRAQ 4plex (K N-term)
tr|E9PLF4|E9PLF4_HUMAN	K.T(+144.10)VTNAVVTVPAYFNDSQR.Q	Y	73.76	2125.09	-9.8	709.364	3	114.03	65120	8	138	155	iTRAQ 4plex (K N-term)
tr|E9PLF4|E9PLF4_HUMAN	K.SFY(+144.10)PEEVSSMVLTK(+144.10).M	Y	73.63	1903.98	-2.4	635.666	3	127.77	71958	1	113	126	iTRAQ 4plex (Y); iTRAQ 4plex (K N-term)
tr|E9PLF4|E9PLF4_HUMAN	K.S(+144.10)FYPEEVSSMVLTK(+144.10).M	Y	73.27	1903.98	-0.8	635.667	3	127.54	71848	8	113	126	iTRAQ 4plex (K N-term)
tr|E9PLF4|E9PLF4_HUMAN	R.T(+144.10)TPSYVAFTDTER.L	N	70.91	1630.79	-19.4	816.388	2	77.04	46827	16	37	49	iTRAQ 4plex (K N-term)
tr|E9PLF4|E9PLF4_HUMAN	K.N(+144.10)QVAMNPTNTVFDAK(+144.10).R	Y	69.67	1936.99	-3.2	646.668	3	89.84	53161	3	57	71	iTRAQ 4plex (K N-term)
tr|E9PLF4|E9PLF4_HUMAN	K.D(+144.10)AGTIAGLNVLR.I	Y	65.6	1342.77	-5.2	672.387	2	101.39	58860	15	160	171	iTRAQ 4plex (K N-term)
tr|E9PLF4|E9PLF4_HUMAN	K.H(+144.10)WPFMVVNDAGRPK(+144.10).V	Y	61.77	1941.02	16.3	486.271	4	99.66	58011	10	89	102	iTRAQ 4plex (K N-term)
tr|E9PLF4|E9PLF4_HUMAN	K.E(+144.10)IAEAYLGK(+144.10).T	Y	58.25	1280.72	-2.6	641.365	2	74.49	45560	10	129	137	iTRAQ 4plex (K N-term)
tr|E9PLF4|E9PLF4_HUMAN	K.V(+144.10)EIIANDQGNR.T	N	55.6	1371.72	-8.6	686.862	2	53.35	35112	13	26	36	iTRAQ 4plex (K N-term)
tr|E9PLF4|E9PLF4_HUMAN	R.R(+144.10)FDDAVVQSDMK(+144.10).H	Y	50.83	1697.86	1.2	566.962	3	64.69	40710	4	77	88	iTRAQ 4plex (K N-term)
tr|E9PLF4|E9PLF4_HUMAN	K.M(+144.10)K(+144.10)EIAEAYLGK(+144.10).T	Y	43.51	1683.95	7.3	562.329	3	99.51	57937	3	127	137	iTRAQ 4plex (K N-term)
tr|E9PLF4|E9PLF4_HUMAN	R.F(+144.10)DDAVVQSDMK(+144.10).H	Y	41.94	1541.76	11.9	514.933	3	74.63	45625	1	78	88	iTRAQ 4plex (K N-term)
tr|E9PLF4|E9PLF4_HUMAN	K.V(+144.10)QVEY(+144.10)KGETK(+144.10).S	Y	35.26	1611.91	3	538.313	3	47.06	32006	3	103	112	iTRAQ 4plex (K N-term); iTRAQ 4plex (Y)
tr|E9PLF4|E9PLF4_HUMAN	R.L(+144.10)IGDAAK(+144.10).N	N	29.31	974.596	-5.2	488.303	2	44.01	30502	16	50	56	iTRAQ 4plex (K N-term)
tr|E9PLF4|E9PLF4_HUMAN	K.V(+144.10)QVEYK(+144.10)GETK(+144.10).S	Y	24.92	1611.91	19.8	403.994	4	47.03	31992	2	103	112	iTRAQ 4plex (K N-term)
tr|E9PLF4|E9PLF4_HUMAN	K.V(+144.10)QVEYK(+144.10).G	Y	23.86	1052.61	6.2	527.314	2	44.74	30864	5	103	108	iTRAQ 4plex (K N-term)
tr|E9PQK7|E9PQK7_HUMAN	K.T(+144.10)VTNAVVTVPAYFNDSQR.Q	Y	73.76	2125.09	-9.8	709.364	3	114.03	65120	8	138	155	iTRAQ 4plex (K N-term)
tr|E9PQK7|E9PQK7_HUMAN	K.SFY(+144.10)PEEVSSMVLTK(+144.10).M	Y	73.63	1903.98	-2.4	635.666	3	127.77	71958	1	113	126	iTRAQ 4plex (Y); iTRAQ 4plex (K N-term)
tr|E9PQK7|E9PQK7_HUMAN	K.S(+144.10)FYPEEVSSMVLTK(+144.10).M	Y	73.27	1903.98	-0.8	635.667	3	127.54	71848	8	113	126	iTRAQ 4plex (K N-term)
tr|E9PQK7|E9PQK7_HUMAN	R.T(+144.10)TPSYVAFTDTER.L	N	70.91	1630.79	-19.4	816.388	2	77.04	46827	16	37	49	iTRAQ 4plex (K N-term)
tr|E9PQK7|E9PQK7_HUMAN	K.N(+144.10)QVAMNPTNTVFDAK(+144.10).R	Y	69.67	1936.99	-3.2	646.668	3	89.84	53161	3	57	71	iTRAQ 4plex (K N-term)
tr|E9PQK7|E9PQK7_HUMAN	K.D(+144.10)AGTIAGLNVLR.I	Y	65.6	1342.77	-5.2	672.387	2	101.39	58860	15	160	171	iTRAQ 4plex (K N-term)
tr|E9PQK7|E9PQK7_HUMAN	K.H(+144.10)WPFMVVNDAGRPK(+144.10).V	Y	61.77	1941.02	16.3	486.271	4	99.66	58011	10	89	102	iTRAQ 4plex (K N-term)
tr|E9PQK7|E9PQK7_HUMAN	K.E(+144.10)IAEAYLGK(+144.10).T	Y	58.25	1280.72	-2.6	641.365	2	74.49	45560	10	129	137	iTRAQ 4plex (K N-term)
tr|E9PQK7|E9PQK7_HUMAN	K.V(+144.10)EIIANDQGNR.T	N	55.6	1371.72	-8.6	686.862	2	53.35	35112	13	26	36	iTRAQ 4plex (K N-term)
tr|E9PQK7|E9PQK7_HUMAN	R.R(+144.10)FDDAVVQSDMK(+144.10).H	Y	50.83	1697.86	1.2	566.962	3	64.69	40710	4	77	88	iTRAQ 4plex (K N-term)
tr|E9PQK7|E9PQK7_HUMAN	K.M(+144.10)K(+144.10)EIAEAYLGK(+144.10).T	Y	43.51	1683.95	7.3	562.329	3	99.51	57937	3	127	137	iTRAQ 4plex (K N-term)
tr|E9PQK7|E9PQK7_HUMAN	R.F(+144.10)DDAVVQSDMK(+144.10).H	Y	41.94	1541.76	11.9	514.933	3	74.63	45625	1	78	88	iTRAQ 4plex (K N-term)
tr|E9PQK7|E9PQK7_HUMAN	K.V(+144.10)QVEY(+144.10)KGETK(+144.10).S	Y	35.26	1611.91	3	538.313	3	47.06	32006	3	103	112	iTRAQ 4plex (K N-term); iTRAQ 4plex (Y)
tr|E9PQK7|E9PQK7_HUMAN	R.L(+144.10)IGDAAK(+144.10).N	N	29.31	974.596	-5.2	488.303	2	44.01	30502	16	50	56	iTRAQ 4plex (K N-term)
tr|E9PQK7|E9PQK7_HUMAN	K.V(+144.10)QVEYK(+144.10)GETK(+144.10).S	Y	24.92	1611.91	19.8	403.994	4	47.03	31992	2	103	112	iTRAQ 4plex (K N-term)
tr|E9PQK7|E9PQK7_HUMAN	K.V(+144.10)QVEYK(+144.10).G	Y	23.86	1052.61	6.2	527.314	2	44.74	30864	5	103	108	iTRAQ 4plex (K N-term)
tr|A8K7Q2|A8K7Q2_HUMAN	K.S(+144.10)INPDEAVAYGAAVQAAILSGDK(+144.10).S	Y	75.14	2547.34	-17.2	850.105	3	158.2	87084	1	126	148	iTRAQ 4plex (K N-term)
tr|A8K7Q2|A8K7Q2_HUMAN	K.S(+144.10)QIHDIVLVGGSTR.I	Y	69.77	1624.9	5.3	542.643	3	78.57	47583	13	93	106	iTRAQ 4plex (K N-term)
tr|A8K7Q2|A8K7Q2_HUMAN	K.N(+144.10)SLESYAFNMK(+144.10).A	Y	65.45	1590.79	10	531.276	3	97.63	57012	11	304	314	iTRAQ 4plex (K N-term)
tr|A8K7Q2|A8K7Q2_HUMAN	R.F(+144.10)EELNADLFR.G	Y	63.63	1396.71	-6	699.357	2	118.77	67470	11	66	75	iTRAQ 4plex (K N-term)
tr|A8K7Q2|A8K7Q2_HUMAN	R.G(+144.10)VPQIEVTFDIDAN(+.98)GILNVSAVDK(+144.10).S	Y	61.04	2802.49	-20.1	935.15	3	171.07	93422	2	234	257	iTRAQ 4plex (K N-term); Deamidation (NQ)
tr|A8K7Q2|A8K7Q2_HUMAN	R.G(+144.10)VPQIEVTFDIDANGILNVSAVDK(+144.10).S	Y	60.17	2801.5	-27.3	934.816	3	171.02	93401	3	234	257	iTRAQ 4plex (K N-term)
tr|A8K7Q2|A8K7Q2_HUMAN	K.NSLESYAFNMK(+144.10).A	Y	52.71	1446.69	-8.6	724.347	2	92.94	54690	2	304	314	iTRAQ 4plex (K N-term)
tr|A8K7Q2|A8K7Q2_HUMAN	R.T(+144.10)LSSSTQASIEIDSLYEGIDFYTSITR.A	Y	51.37	3140.55	-31.2	1047.82	3	174.52	95127	1	37	63	iTRAQ 4plex (K N-term)
tr|A8K7Q2|A8K7Q2_HUMAN	R.FEELNADLFR.G	Y	44.57	1252.61	3.6	627.314	2	106.8	61533	1	66	75
tr|A8K7Q2|A8K7Q2_HUMAN	M(+144.10)VNHFIAEFK(+144.10).R	Y	43.41	1522.82	13.3	508.62	3	108.38	62318	3	1	10	iTRAQ 4plex (K N-term)
tr|A8K7Q2|A8K7Q2_HUMAN	K.L(+144.10)DK(+144.10)SQIHDIVLVGGSTR.I	Y	42.39	2125.21	5.4	532.312	4	100.3	58328	3	90	106	iTRAQ 4plex (K N-term)
tr|A8K7Q2|A8K7Q2_HUMAN	R.G(+144.10)TLDPVEK(+144.10).A	Y	34.85	1145.65	-0.9	573.832	2	47.08	32021	6	76	83	iTRAQ 4plex (K N-term)
tr|A8K7Q2|A8K7Q2_HUMAN	R.N(+144.10)TTIPTK(+144.10).Q	N	32.58	1061.63	4.5	531.824	2	34.24	25694	6	181	187	iTRAQ 4plex (K N-term)
tr|A8K7Q2|A8K7Q2_HUMAN	K.I(+144.10)TITNDK(+144.10).G	N	31.87	1091.64	4	546.829	2	48.68	32799	9	265	271	iTRAQ 4plex (K N-term)
tr|A8K7Q2|A8K7Q2_HUMAN	K.D(+144.10)NNLLGK(+144.10).F	Y	30.71	1060.61	0.9	531.312	2	41.94	29478	11	216	222	iTRAQ 4plex (K N-term)
tr|A8K7Q2|A8K7Q2_HUMAN	R.M(+144.10)VQEAEK(+144.10).Y	Y	29.72	1121.6	-2	561.804	2	28.93	23067	3	282	288	iTRAQ 4plex (K N-term)
tr|E9PPY6|E9PPY6_HUMAN	K.SFY(+144.10)PEEVSSMVLTK(+144.10).M	Y	73.63	1903.98	-2.4	635.666	3	127.77	71958	1	113	126	iTRAQ 4plex (Y); iTRAQ 4plex (K N-term)
tr|E9PPY6|E9PPY6_HUMAN	K.S(+144.10)FYPEEVSSMVLTK(+144.10).M	Y	73.27	1903.98	-0.8	635.667	3	127.54	71848	8	113	126	iTRAQ 4plex (K N-term)
tr|E9PPY6|E9PPY6_HUMAN	R.T(+144.10)TPSYVAFTDTER.L	N	70.91	1630.79	-19.4	816.388	2	77.04	46827	16	37	49	iTRAQ 4plex (K N-term)
tr|E9PPY6|E9PPY6_HUMAN	K.N(+144.10)QVAMNPTNTVFDAK(+144.10).R	Y	69.67	1936.99	-3.2	646.668	3	89.84	53161	3	57	71	iTRAQ 4plex (K N-term)
tr|E9PPY6|E9PPY6_HUMAN	K.H(+144.10)WPFMVVNDAGRPK(+144.10).V	Y	61.77	1941.02	16.3	486.271	4	99.66	58011	10	89	102	iTRAQ 4plex (K N-term)
tr|E9PPY6|E9PPY6_HUMAN	K.E(+144.10)IAEAYLGK(+144.10)	Y	58.25	1280.72	-2.6	641.365	2	74.49	45560	10	129	137	iTRAQ 4plex (K N-term)
tr|E9PPY6|E9PPY6_HUMAN	K.V(+144.10)EIIANDQGNR.T	N	55.6	1371.72	-8.6	686.862	2	53.35	35112	13	26	36	iTRAQ 4plex (K N-term)
tr|E9PPY6|E9PPY6_HUMAN	R.R(+144.10)FDDAVVQSDMK(+144.10).H	Y	50.83	1697.86	1.2	566.962	3	64.69	40710	4	77	88	iTRAQ 4plex (K N-term)
tr|E9PPY6|E9PPY6_HUMAN	K.M(+144.10)K(+144.10)EIAEAYLGK(+144.10)	Y	43.51	1683.95	7.3	562.329	3	99.51	57937	3	127	137	iTRAQ 4plex (K N-term)
tr|E9PPY6|E9PPY6_HUMAN	R.F(+144.10)DDAVVQSDMK(+144.10).H	Y	41.94	1541.76	11.9	514.933	3	74.63	45625	1	78	88	iTRAQ 4plex (K N-term)
tr|E9PPY6|E9PPY6_HUMAN	K.V(+144.10)QVEY(+144.10)KGETK(+144.10).S	Y	35.26	1611.91	3	538.313	3	47.06	32006	3	103	112	iTRAQ 4plex (K N-term); iTRAQ 4plex (Y)
tr|E9PPY6|E9PPY6_HUMAN	R.L(+144.10)IGDAAK(+144.10).N	N	29.31	974.596	-5.2	488.303	2	44.01	30502	16	50	56	iTRAQ 4plex (K N-term)
tr|E9PPY6|E9PPY6_HUMAN	K.V(+144.10)QVEYK(+144.10)GETK(+144.10).S	Y	24.92	1611.91	19.8	403.994	4	47.03	31992	2	103	112	iTRAQ 4plex (K N-term)
tr|E9PPY6|E9PPY6_HUMAN	K.V(+144.10)QVEYK(+144.10).G	Y	23.86	1052.61	6.2	527.314	2	44.74	30864	5	103	108	iTRAQ 4plex (K N-term)
sp|P54652|HSP72_HUMAN	R.T(+144.10)TPSYVAFTDTER.L	N	70.91	1630.79	-19.4	816.388	2	77.04	46827	16	38	50	iTRAQ 4plex (K N-term)
sp|P54652|HSP72_HUMAN	R.F(+144.10)EELNADLFR.G	Y	63.63	1396.71	-6	699.357	2	118.77	67470	11	305	314	iTRAQ 4plex (K N-term)
sp|P54652|HSP72_HUMAN	K.S(+144.10)TAGDTHLGGEDFDNR.M	Y	55.68	1834.82	-6	612.61	3	45.68	31327	1	224	239	iTRAQ 4plex (K N-term)
sp|P54652|HSP72_HUMAN	K.V(+144.10)EIIANDQGNR.T	N	55.6	1371.72	-8.6	686.862	2	53.35	35112	13	27	37	iTRAQ 4plex (K N-term)
sp|P54652|HSP72_HUMAN	R.I(+144.10)INEPTAAAIAYGLDK(+144.10)K(+144.10).G	Y	54.64	2219.28	0.4	555.828	4	120.83	68499	2	173	189	iTRAQ 4plex (K N-term)
sp|P54652|HSP72_HUMAN	R.FEELNADLFR.G	Y	44.57	1252.61	3.6	627.314	2	106.8	61533	1	305	314
sp|P54652|HSP72_HUMAN	K.V(+144.10)QVEY(+144.10)KGETK(+144.10).T	Y	35.26	1611.91	3	538.313	3	47.06	32006	3	104	113	iTRAQ 4plex (K N-term); iTRAQ 4plex (Y)
sp|P54652|HSP72_HUMAN	R.N(+144.10)TTIPTK(+144.10).Q	N	32.58	1061.63	4.5	531.824	2	34.24	25694	6	420	426	iTRAQ 4plex (K N-term)
sp|P54652|HSP72_HUMAN	K.I(+144.10)TITNDK(+144.10).G	N	31.87	1091.64	4	546.829	2	48.68	32799	9	504	510	iTRAQ 4plex (K N-term)
sp|P54652|HSP72_HUMAN	K.D(+144.10)NNLLGK(+144.10).F	Y	30.71	1060.61	0.9	531.312	2	41.94	29478	11	455	461	iTRAQ 4plex (K N-term)
sp|P54652|HSP72_HUMAN	R.L(+144.10)IGDAAK(+144.10).N	N	29.31	974.596	-5.2	488.303	2	44.01	30502	16	51	57	iTRAQ 4plex (K N-term)
sp|P54652|HSP72_HUMAN	K.V(+144.10)QVEYK(+144.10)GETK(+144.10).T	Y	24.92	1611.91	19.8	403.994	4	47.03	31992	2	104	113	iTRAQ 4plex (K N-term)
sp|P54652|HSP72_HUMAN	K.V(+144.10)QVEYK(+144.10).G	Y	23.86	1052.61	6.2	527.314	2	44.74	30864	5	104	109	iTRAQ 4plex (K N-term)
tr|E9PI65|E9PI65_HUMAN	K.T(+144.10)VTNAVVTVPAYFNDSQR.Q	Y	73.76	2125.09	-9.8	709.364	3	114.03	65120	8	97	114	iTRAQ 4plex (K N-term)
tr|E9PI65|E9PI65_HUMAN	K.SFY(+144.10)PEEVSSMVLTK(+144.10).M	Y	73.63	1903.98	-2.4	635.666	3	127.77	71958	1	72	85	iTRAQ 4plex (Y); iTRAQ 4plex (K N-term)
tr|E9PI65|E9PI65_HUMAN	K.S(+144.10)FYPEEVSSMVLTK(+144.10).M	Y	73.27	1903.98	-0.8	635.667	3	127.54	71848	8	72	85	iTRAQ 4plex (K N-term)
tr|E9PI65|E9PI65_HUMAN	R.T(+144.10)TPSYVAFTDTER.L	N	70.91	1630.79	-19.4	816.388	2	77.04	46827	16	37	49	iTRAQ 4plex (K N-term)
tr|E9PI65|E9PI65_HUMAN	K.D(+144.10)AGTIAGLNVLR.I	Y	65.6	1342.77	-5.2	672.387	2	101.39	58860	15	119	130	iTRAQ 4plex (K N-term)
tr|E9PI65|E9PI65_HUMAN	K.E(+144.10)IAEAYLGK(+144.10).T	Y	58.25	1280.72	-2.6	641.365	2	74.49	45560	10	88	96	iTRAQ 4plex (K N-term)
tr|E9PI65|E9PI65_HUMAN	K.V(+144.10)EIIANDQGNR.T	N	55.6	1371.72	-8.6	686.862	2	53.35	35112	13	26	36	iTRAQ 4plex (K N-term)
tr|E9PI65|E9PI65_HUMAN	R.I(+144.10)INEPTAAAIAYGLDK(+144.10)K(+144.10).V	Y	54.64	2219.28	0.4	555.828	4	120.83	68499	2	131	147	iTRAQ 4plex (K N-term)
tr|E9PI65|E9PI65_HUMAN	K.M(+144.10)K(+144.10)EIAEAYLGK(+144.10).T	Y	43.51	1683.95	7.3	562.329	3	99.51	57937	3	86	96	iTRAQ 4plex (K N-term)
tr|E9PI65|E9PI65_HUMAN	R.L(+144.10)IGDAAK(+144.10).N	N	29.31	974.596	-5.2	488.303	2	44.01	30502	16	50	56	iTRAQ 4plex (K N-term)
tr|E9PN25|E9PN25_HUMAN	K.SFY(+144.10)PEEVSSMVLTK(+144.10).M	Y	73.63	1903.98	-2.4	635.666	3	127.77	71958	1	113	126	iTRAQ 4plex (Y); iTRAQ 4plex (K N-term)
tr|E9PN25|E9PN25_HUMAN	K.S(+144.10)FYPEEVSSMVLTK(+144.10).M	Y	73.27	1903.98	-0.8	635.667	3	127.54	71848	8	113	126	iTRAQ 4plex (K N-term)
tr|E9PN25|E9PN25_HUMAN	R.T(+144.10)TPSYVAFTDTER.L	N	70.91	1630.79	-19.4	816.388	2	77.04	46827	16	37	49	iTRAQ 4plex (K N-term)
tr|E9PN25|E9PN25_HUMAN	K.N(+144.10)QVAMNPTNTVFDAK(+144.10).R	Y	69.67	1936.99	-3.2	646.668	3	89.84	53161	3	57	71	iTRAQ 4plex (K N-term)
tr|E9PN25|E9PN25_HUMAN	K.H(+144.10)WPFMVVNDAGRPK(+144.10).V	Y	61.77	1941.02	16.3	486.271	4	99.66	58011	10	89	102	iTRAQ 4plex (K N-term)
tr|E9PN25|E9PN25_HUMAN	K.V(+144.10)EIIANDQGNR.T	N	55.6	1371.72	-8.6	686.862	2	53.35	35112	13	26	36	iTRAQ 4plex (K N-term)
tr|E9PN25|E9PN25_HUMAN	R.R(+144.10)FDDAVVQSDMK(+144.10).H	Y	50.83	1697.86	1.2	566.962	3	64.69	40710	4	77	88	iTRAQ 4plex (K N-term)
tr|E9PN25|E9PN25_HUMAN	R.F(+144.10)DDAVVQSDMK(+144.10).H	Y	41.94	1541.76	11.9	514.933	3	74.63	45625	1	78	88	iTRAQ 4plex (K N-term)
tr|E9PN25|E9PN25_HUMAN	K.V(+144.10)QVEY(+144.10)KGETK(+144.10).S	Y	35.26	1611.91	3	538.313	3	47.06	32006	3	103	112	iTRAQ 4plex (K N-term); iTRAQ 4plex (Y)
tr|E9PN25|E9PN25_HUMAN	R.L(+144.10)IGDAAK(+144.10).N	N	29.31	974.596	-5.2	488.303	2	44.01	30502	16	50	56	iTRAQ 4plex (K N-term)
tr|E9PN25|E9PN25_HUMAN	K.V(+144.10)QVEYK(+144.10)GETK(+144.10).S	Y	24.92	1611.91	19.8	403.994	4	47.03	31992	2	103	112	iTRAQ 4plex (K N-term)
tr|E9PN25|E9PN25_HUMAN	K.V(+144.10)QVEYK(+144.10).G	Y	23.86	1052.61	6.2	527.314	2	44.74	30864	5	103	108	iTRAQ 4plex (K N-term)
tr|E9PS65|E9PS65_HUMAN	K.N(+144.10)SLESYAFNMK(+144.10).A	Y	65.45	1590.79	10	531.276	3	97.63	57012	11	131	141	iTRAQ 4plex (K N-term)
tr|E9PS65|E9PS65_HUMAN	R.G(+144.10)VPQIEVTFDIDAN(+.98)GILNVSAVDK(+144.10).S	Y	61.04	2802.49	-20.1	935.15	3	171.07	93422	2	61	84	iTRAQ 4plex (K N-term); Deamidation (NQ)
tr|E9PS65|E9PS65_HUMAN	R.G(+144.10)VPQIEVTFDIDANGILNVSAVDK(+144.10).S	Y	60.17	2801.5	-27.3	934.816	3	171.02	93401	3	61	84	iTRAQ 4plex (K N-term)
tr|E9PS65|E9PS65_HUMAN	K.NSLESYAFNMK(+144.10).A	Y	52.71	1446.69	-8.6	724.347	2	92.94	54690	2	131	141	iTRAQ 4plex (K N-term)
tr|E9PS65|E9PS65_HUMAN	R.N(+144.10)TTIPTK(+144.10).Q	N	32.58	1061.63	4.5	531.824	2	34.24	25694	6	8	14	iTRAQ 4plex (K N-term)
tr|E9PS65|E9PS65_HUMAN	K.I(+144.10)TITNDK(+144.10).G	N	31.87	1091.64	4	546.829	2	48.68	32799	9	92	98	iTRAQ 4plex (K N-term)
tr|E9PS65|E9PS65_HUMAN	K.D(+144.10)NNLLGK(+144.10).F	Y	30.71	1060.61	0.9	531.312	2	41.94	29478	11	43	49	iTRAQ 4plex (K N-term)
tr|E9PS65|E9PS65_HUMAN	R.M(+144.10)VQEAEK(+144.10).Y	Y	29.72	1121.6	-2	561.804	2	28.93	23067	3	109	115	iTRAQ 4plex (K N-term)
tr|E9PM13|E9PM13_HUMAN	K.N(+144.10)SLESYAFNMK(+144.10).A	Y	65.45	1590.79	10	531.276	3	97.63	57012	11	92	102	iTRAQ 4plex (K N-term)
tr|E9PM13|E9PM13_HUMAN	R.G(+144.10)VPQIEVTFDIDAN(+.98)GILNVSAVDK(+144.10).S	Y	61.04	2802.49	-20.1	935.15	3	171.07	93422	2	22	45	iTRAQ 4plex (K N-term); Deamidation (NQ)
tr|E9PM13|E9PM13_HUMAN	R.G(+144.10)VPQIEVTFDIDANGILNVSAVDK(+144.10).S	Y	60.17	2801.5	-27.3	934.816	3	171.02	93401	3	22	45	iTRAQ 4plex (K N-term)
tr|E9PM13|E9PM13_HUMAN	K.NSLESYAFNMK(+144.10).A	Y	52.71	1446.69	-8.6	724.347	2	92.94	54690	2	92	102	iTRAQ 4plex (K N-term)
tr|E9PM13|E9PM13_HUMAN	K.I(+144.10)TITNDK(+144.10).G	N	31.87	1091.64	4	546.829	2	48.68	32799	9	53	59	iTRAQ 4plex (K N-term)
tr|E9PM13|E9PM13_HUMAN	K.D(+144.10)NNLLGK(+144.10).F	Y	30.71	1060.61	0.9	531.312	2	41.94	29478	11	4	10	iTRAQ 4plex (K N-term)
tr|E9PM13|E9PM13_HUMAN	R.M(+144.10)VQEAEK(+144.10).Y	Y	29.72	1121.6	-2	561.804	2	28.93	23067	3	70	76	iTRAQ 4plex (K N-term)
sp|P0DMV9|HS71B_HUMAN	R.T(+144.10)TPSYVAFTDTER.L	N	70.91	1630.79	-19.4	816.388	2	77.04	46827	16	37	49	iTRAQ 4plex (K N-term)
sp|P0DMV9|HS71B_HUMAN	K.V(+144.10)EIIANDQGNR.T	N	55.6	1371.72	-8.6	686.862	2	53.35	35112	13	26	36	iTRAQ 4plex (K N-term)
sp|P0DMV9|HS71B_HUMAN	K.I(+144.10)TITNDK(+144.10).G	N	31.87	1091.64	4	546.829	2	48.68	32799	9	501	507	iTRAQ 4plex (K N-term)
sp|P0DMV9|HS71B_HUMAN	R.M(+144.10)VQEAEK(+144.10).Y	Y	29.72	1121.6	-2	561.804	2	28.93	23067	3	518	524	iTRAQ 4plex (K N-term)
sp|P0DMV9|HS71B_HUMAN	R.L(+144.10)IGDAAK(+144.10).N	N	29.31	974.596	-5.2	488.303	2	44.01	30502	16	50	56	iTRAQ 4plex (K N-term)
sp|P0DMV8|HS71A_HUMAN	R.T(+144.10)TPSYVAFTDTER.L	N	70.91	1630.79	-19.4	816.388	2	77.04	46827	16	37	49	iTRAQ 4plex (K N-term)
sp|P0DMV8|HS71A_HUMAN	K.V(+144.10)EIIANDQGNR.T	N	55.6	1371.72	-8.6	686.862	2	53.35	35112	13	26	36	iTRAQ 4plex (K N-term)
sp|P0DMV8|HS71A_HUMAN	K.I(+144.10)TITNDK(+144.10).G	N	31.87	1091.64	4	546.829	2	48.68	32799	9	501	507	iTRAQ 4plex (K N-term)
sp|P0DMV8|HS71A_HUMAN	R.M(+144.10)VQEAEK(+144.10).Y	Y	29.72	1121.6	-2	561.804	2	28.93	23067	3	518	524	iTRAQ 4plex (K N-term)
sp|P0DMV8|HS71A_HUMAN	R.L(+144.10)IGDAAK(+144.10).N	N	29.31	974.596	-5.2	488.303	2	44.01	30502	16	50	56	iTRAQ 4plex (K N-term)
tr|A0A0G2JIW1|A0A0G2JIW1_HUMAN	R.T(+144.10)TPSYVAFTDTER.L	N	70.91	1630.79	-19.4	816.388	2	77.04	46827	16	38	50	iTRAQ 4plex (K N-term)
tr|A0A0G2JIW1|A0A0G2JIW1_HUMAN	K.V(+144.10)EIIANDQGNR.T	N	55.6	1371.72	-8.6	686.862	2	53.35	35112	13	27	37	iTRAQ 4plex (K N-term)
tr|A0A0G2JIW1|A0A0G2JIW1_HUMAN	K.I(+144.10)TITNDK(+144.10).G	N	31.87	1091.64	4	546.829	2	48.68	32799	9	502	508	iTRAQ 4plex (K N-term)
tr|A0A0G2JIW1|A0A0G2JIW1_HUMAN	R.M(+144.10)VQEAEK(+144.10).Y	Y	29.72	1121.6	-2	561.804	2	28.93	23067	3	519	525	iTRAQ 4plex (K N-term)
tr|A0A0G2JIW1|A0A0G2JIW1_HUMAN	R.L(+144.10)IGDAAK(+144.10).N	N	29.31	974.596	-5.2	488.303	2	44.01	30502	16	51	57	iTRAQ 4plex (K N-term)
tr|V9GZ37|V9GZ37_HUMAN	K.I(+144.10)TITNDK(+144.10).G	N	31.87	1091.64	4	546.829	2	48.68	32799	9	336	342	iTRAQ 4plex (K N-term)
tr|V9GZ37|V9GZ37_HUMAN	R.M(+144.10)VQEAEK(+144.10).Y	Y	29.72	1121.6	-2	561.804	2	28.93	23067	3	353	359	iTRAQ 4plex (K N-term)
sp|P35579|MYH9_HUMAN	R.I(+144.10)IGLDQVAGMSETALPGAFK(+144.10).T	Y	91.18	2305.26	-9.4	769.418	3	158.4	87182	5	618	637	iTRAQ 4plex (K N-term)
sp|P35579|MYH9_HUMAN	R.D(+144.10)LGEELEALK(+144.10)TELEDTLDSTAAQQELR.S	Y	82.19	3304.67	-6	827.17	4	186.61	101142	4	1136	1162	iTRAQ 4plex (K N-term)
sp|P35579|MYH9_HUMAN	K.D(+144.10)FSALESQLQDTQELLQEENR.Q	Y	72.41	2636.27	-21	879.744	3	148.8	82434	1	1302	1322	iTRAQ 4plex (K N-term)
sp|P35579|MYH9_HUMAN	R.L(+144.10)QQELDDLLVDLDHQR.Q	Y	68.33	2093.09	-8.7	698.696	3	167.96	91889	10	1418	1433	iTRAQ 4plex (K N-term)
sp|P35579|MYH9_HUMAN	K.S(+144.10)MEAEMIQLQEELAAAER.A	Y	63.3	2192.06	-7.1	731.687	3	159.47	87711	3	1677	1694	iTRAQ 4plex (K N-term)
sp|P35579|MYH9_HUMAN	R.I(+144.10)NFDVNGYIVGANIETYLLEK(+144.10).S	Y	60.88	2672.43	-16.8	891.801	3	175.36	95540	2	241	261	iTRAQ 4plex (K N-term)
sp|P35579|MYH9_HUMAN	R.A(+144.10)GVLAHLEEER.D	N	60.67	1366.73	-10.1	684.366	2	73.37	45011	10	765	775	iTRAQ 4plex (K N-term)
sp|P35579|MYH9_HUMAN	R.Q(-17.03)LLQANPILEAFGNAK(+144.10).T	N	58.49	1853.01	-18.7	927.497	2	171.08	93430	7	210	225	Pyro-glu from Q; iTRAQ 4plex (K N-term)
sp|P35579|MYH9_HUMAN	K.A(+144.10)LELDSNLYR.I	Y	53.3	1336.71	-3.8	669.359	2	87.5	52007	13	746	755	iTRAQ 4plex (K N-term)
sp|P35579|MYH9_HUMAN	K.I(+144.10)AQLEEQLDNETK(+144.10).E	Y	47.3	1817.96	0.8	606.994	3	97.27	56835	1	1816	1828	iTRAQ 4plex (K N-term)
sp|P35579|MYH9_HUMAN	R.I(+144.10)NFDVN(+.98)GYIVGANIETYLLEK(+144.10).S	Y	44.99	2673.41	-20	892.126	3	173.82	94783	2	241	261	iTRAQ 4plex (K N-term); Deamidation (NQ)
sp|P35579|MYH9_HUMAN	R.L(+144.10)EVNLQAMK(+144.10).A	Y	41.31	1332.76	-3.3	667.387	2	100.13	58244	2	1558	1566	iTRAQ 4plex (K N-term)
sp|P35579|MYH9_HUMAN	K.G(+144.10)ALALEEK(+144.10).R	Y	39.35	1117.65	3.8	559.837	2	54.73	35793	5	1717	1724	iTRAQ 4plex (K N-term)
sp|P35579|MYH9_HUMAN	K.D(+144.10)LEGLSQR.H	Y	39.12	1060.56	0	531.288	2	41.46	29247	13	1393	1400	iTRAQ 4plex (K N-term)
sp|P35579|MYH9_HUMAN	K.A(+144.10)DEWLMK(+144.10).N	N	34.38	1179.62	-4.9	590.812	2	77.62	47111	5	581	587	iTRAQ 4plex (K N-term)
sp|P35579|MYH9_HUMAN	R.V(+144.10)VFQEFR.Q	Y	30.38	1067.59	8.7	534.805	2	84.96	50747	3	712	718	iTRAQ 4plex (K N-term)
sp|P35579|MYH9_HUMAN	R.T(+144.10)EMEDLMSSK(+144.10).D	Y	29.91	1457.69	8.3	486.909	3	74.35	45489	1	1504	1513	iTRAQ 4plex (K N-term)
sp|P35579|MYH9_HUMAN	K.G(+144.10)FMDGK(+144.10).Q	N	25.69	941.484	10.3	471.754	2	37.23	27176	8	732	737	iTRAQ 4plex (K N-term)
sp|P08238|HS90B_HUMAN	R.G(+144.10)VVDSEDLPLNISR.E	N	76.78	1656.88	-17	829.432	2	105.52	60907	13	379	392	iTRAQ 4plex (K N-term)
sp|P08238|HS90B_HUMAN	K.H(+144.10)LEINPDHPIVETLR.Q	Y	72.16	1926.04	12.2	482.524	4	96.41	56416	9	625	639	iTRAQ 4plex (K N-term)
sp|P08238|HS90B_HUMAN	K.S(+144.10)IYYITGESK(+144.10).E	Y	67.54	1447.78	-10.7	724.888	2	75.76	46185	7	482	491	iTRAQ 4plex (K N-term)
sp|P08238|HS90B_HUMAN	K.V(+144.10)ILHLK(+144.10)EDQTEYLEER.R	N	67.23	2302.24	-12.3	768.41	3	98.59	57486	9	181	196	iTRAQ 4plex (K N-term)
sp|P08238|HS90B_HUMAN	R.E(+144.10)LISNASDALDK(+144.10).I	N	67.11	1562.84	-10.8	782.417	2	80.06	48321	10	42	53	iTRAQ 4plex (K N-term)
sp|P08238|HS90B_HUMAN	K.H(+144.10)NDDEQYAWESSAGGSFTVR.A	N	65.33	2399.05	-13.5	800.68	3	85.81	51171	7	149	168	iTRAQ 4plex (K N-term)
sp|P08238|HS90B_HUMAN	K.A(+144.10)DLINNLGTIAK(+144.10).S	N	63.43	1529.9	-9	765.949	2	108.83	62546	5	96	107	iTRAQ 4plex (K N-term)
sp|P08238|HS90B_HUMAN	R.T(+144.10)LTLVDTGIGMTK(+144.10).A	N	63.15	1636.93	-16.9	819.457	2	111.85	64031	4	83	95	iTRAQ 4plex (K N-term)
sp|P08238|HS90B_HUMAN	K.E(+144.10)QVANSAFVER.V	Y	58.6	1392.71	-17.6	697.35	2	52.5	34694	6	492	502	iTRAQ 4plex (K N-term)
sp|P08238|HS90B_HUMAN	K.H(+144.10)FSVEGQLEFR.A	N	56.27	1491.76	12.3	498.266	3	87.56	52035	6	320	330	iTRAQ 4plex (K N-term)
sp|P08238|HS90B_HUMAN	R.E(+144.10)LISNASDALDK(+144.10)IR.Y	N	56.25	1832.02	0.2	611.681	3	106.53	61400	1	42	55	iTRAQ 4plex (K N-term)
sp|P08238|HS90B_HUMAN	R.Y(+144.10)ESLTDPSK(+144.10).L	N	50.25	1326.69	-18.5	664.338	2	51.78	34330	4	56	64	iTRAQ 4plex (Y); iTRAQ 4plex (K N-term)
sp|P08238|HS90B_HUMAN	R.Y(+144.10)ESLTDPSK(+144.10)LDSGK(+144.10).E	N	49.3	1971.05	12.6	493.775	4	73.71	45172	1	56	69	iTRAQ 4plex (Y); iTRAQ 4plex (K N-term)
sp|P08238|HS90B_HUMAN	K.A(+144.10)DLIN(+.98)NLGTIAK(+144.10).S	N	47.44	1530.88	-7.7	766.442	2	99.86	58112	1	96	107	iTRAQ 4plex (K N-term); Deamidation (NQ)
sp|P08238|HS90B_HUMAN	K.I(+144.10)DIIPNPQER.T	Y	46.29	1337.74	-4.8	669.874	2	89.93	53205	16	73	82	iTRAQ 4plex (K N-term)
sp|P08238|HS90B_HUMAN	K.L(+144.10)GIHEDSTNR.R	Y	45.74	1284.65	12.3	429.23	3	30.66	23921	13	439	448	iTRAQ 4plex (K N-term)
sp|P08238|HS90B_HUMAN	R.V(+144.10)FIMDSC(+57.02)DELIPEYLNFIR.G	Y	42.33	2517.24	-11.5	840.077	3	179.27	97479	2	360	378	iTRAQ 4plex (K N-term); Carbamidomethylation
sp|P08238|HS90B_HUMAN	K.F(+144.10)YEAFSK(+144.10).N	Y	41.45	1178.62	-0.5	590.316	2	78.19	47394	4	429	435	iTRAQ 4plex (K N-term)
sp|P08238|HS90B_HUMAN	K.S(+144.10)IYY(+144.10)ITGESK(+144.10).E	Y	39.07	1591.88	-16	796.933	2	67.61	42141	1	482	491	iTRAQ 4plex (K N-term); iTRAQ 4plex (Y)
sp|P08238|HS90B_HUMAN	R.R(+144.10)APFDLFENK(+144.10).K	Y	38.56	1523.83	-11.8	762.913	2	100.94	58641	5	338	347	iTRAQ 4plex (K N-term)
sp|P08238|HS90B_HUMAN	R.A(+144.10)DHGEPIGR.G	Y	37.33	1094.56	21.2	365.867	3	14.25	15810	3	169	177	iTRAQ 4plex (K N-term)
sp|P08238|HS90B_HUMAN	R.E(+144.10)MLQQSK(+144.10).I	N	35.76	1150.62	-8.4	576.313	2	29.32	23265	7	393	399	iTRAQ 4plex (K N-term)
sp|P08238|HS90B_HUMAN	K.Y(+144.10)IDQEELNK(+144.10).T	N	35.31	1438.75	12.3	480.597	3	61.51	39134	4	276	284	iTRAQ 4plex (Y); iTRAQ 4plex (K N-term)
sp|P08238|HS90B_HUMAN	R.A(+144.10)LLFIPR.R	Y	30.18	972.622	-15.5	487.311	2	112.89	64551	27	331	337	iTRAQ 4plex (K N-term)
sp|P08238|HS90B_HUMAN	K.S(+144.10)LVSVTK(+144.10).E	Y	28.33	1020.64	11.5	511.332	2	54.21	35537	10	532	538	iTRAQ 4plex (K N-term)
sp|P08238|HS90B_HUMAN	K.V(+144.10)TISNR.L	Y	27.28	832.487	13.8	417.256	2	23.98	20620	10	578	583	iTRAQ 4plex (K N-term)
sp|P08238|HS90B_HUMAN	K.T(+144.10)K(+144.10)PIWTR.N	N	26.13	1188.72	22.8	397.256	3	46.01	31486	12	285	291	iTRAQ 4plex (K N-term)
sp|P08238|HS90B_HUMAN	R.L(+144.10)SELLR.Y	N	25.07	873.538	17.4	437.784	2	81.51	49032	18	451	456	iTRAQ 4plex (K N-term)
sp|P08238|HS90B_HUMAN	S.N(+144.10)K(+144.10)EIFLR.E	N	21.81	1206.73	20.5	403.258	3	57.21	37006	2	35	41	iTRAQ 4plex (K N-term)
sp|Q58FF7|H90B3_HUMAN	H.G(+144.10)VVDSEDLPLNISR.E	N	76.78	1656.88	-17	829.432	2	105.52	60907	13	321	334	iTRAQ 4plex (K N-term)
sp|Q58FF7|H90B3_HUMAN	K.V(+144.10)ILHLK(+144.10)EDQTEYLEER.R	N	67.23	2302.24	-12.3	768.41	3	98.59	57486	9	160	175	iTRAQ 4plex (K N-term)
sp|Q58FF7|H90B3_HUMAN	Q.E(+144.10)LISNASDALDK(+144.10).I	N	67.11	1562.84	-10.8	782.417	2	80.06	48321	10	42	53	iTRAQ 4plex (K N-term)
sp|Q58FF7|H90B3_HUMAN	K.E(+144.10)QVANSAFVER.V	Y	58.6	1392.71	-17.6	697.35	2	52.5	34694	6	365	375	iTRAQ 4plex (K N-term)
sp|Q58FF7|H90B3_HUMAN	K.H(+144.10)FSVEGQLEFR.A	N	56.27	1491.76	12.3	498.266	3	87.56	52035	6	262	272	iTRAQ 4plex (K N-term)
sp|Q58FF7|H90B3_HUMAN	Q.E(+144.10)LISNASDALDK(+144.10)IR.Y	N	56.25	1832.02	0.2	611.681	3	106.53	61400	1	42	55	iTRAQ 4plex (K N-term)
sp|Q58FF7|H90B3_HUMAN	R.Y(+144.10)ESLTDPSK(+144.10).L	N	50.25	1326.69	-18.5	664.338	2	51.78	34330	4	56	64	iTRAQ 4plex (Y); iTRAQ 4plex (K N-term)
sp|Q58FF7|H90B3_HUMAN	R.Y(+144.10)ESLTDPSK(+144.10)LDSGK(+144.10).E	N	49.3	1971.05	12.6	493.775	4	73.71	45172	1	56	69	iTRAQ 4plex (Y); iTRAQ 4plex (K N-term)
sp|Q58FF7|H90B3_HUMAN	K.I(+144.10)DIIPNPQER.T	Y	46.29	1337.74	-4.8	669.874	2	89.93	53205	16	73	82	iTRAQ 4plex (K N-term)
sp|Q58FF7|H90B3_HUMAN	R.R(+144.10)APFDLFENK(+144.10).K	Y	38.56	1523.83	-11.8	762.913	2	100.94	58641	5	280	289	iTRAQ 4plex (K N-term)
sp|Q58FF7|H90B3_HUMAN	H.A(+144.10)DHGEPIGR.G	Y	37.33	1094.56	21.2	365.867	3	14.25	15810	3	148	156	iTRAQ 4plex (K N-term)
sp|Q58FF7|H90B3_HUMAN	R.E(+144.10)MLQQSK(+144.10).I	N	35.76	1150.62	-8.4	576.313	2	29.32	23265	7	335	341	iTRAQ 4plex (K N-term)
sp|Q58FF7|H90B3_HUMAN	K.S(+144.10)LVSVTK(+144.10).E	Y	28.33	1020.64	11.5	511.332	2	54.21	35537	10	405	411	iTRAQ 4plex (K N-term)
sp|Q58FF7|H90B3_HUMAN	K.V(+144.10)TISNR.L	Y	27.28	832.487	13.8	417.256	2	23.98	20620	10	451	456	iTRAQ 4plex (K N-term)
sp|Q58FF8|H90B2_HUMAN	K.S(+144.10)IYYITGESK(+144.10).E	Y	67.54	1447.78	-10.7	724.888	2	75.76	46185	7	258	267	iTRAQ 4plex (K N-term)
sp|Q58FF8|H90B2_HUMAN	W.E(+144.10)LISNASDALDK(+144.10).I	N	67.11	1562.84	-10.8	782.417	2	80.06	48321	10	42	53	iTRAQ 4plex (K N-term)
sp|Q58FF8|H90B2_HUMAN	K.A(+144.10)DLINNLGTIAK(+144.10).F	N	63.43	1529.9	-9	765.949	2	108.83	62546	5	96	107	iTRAQ 4plex (K N-term)
sp|Q58FF8|H90B2_HUMAN	H.T(+144.10)LTLVDTGIGMTK(+144.10).A	N	63.15	1636.93	-16.9	819.457	2	111.85	64031	4	83	95	iTRAQ 4plex (K N-term)
sp|Q58FF8|H90B2_HUMAN	W.E(+144.10)LISNASDALDK(+144.10)IR.Y	N	56.25	1832.02	0.2	611.681	3	106.53	61400	1	42	55	iTRAQ 4plex (K N-term)
sp|Q58FF8|H90B2_HUMAN	R.Y(+144.10)ESLTDPSK(+144.10).L	N	50.25	1326.69	-18.5	664.338	2	51.78	34330	4	56	64	iTRAQ 4plex (Y); iTRAQ 4plex (K N-term)
sp|Q58FF8|H90B2_HUMAN	R.Y(+144.10)ESLTDPSK(+144.10)LDSGK(+144.10).E	N	49.3	1971.05	12.6	493.775	4	73.71	45172	1	56	69	iTRAQ 4plex (Y); iTRAQ 4plex (K N-term)
sp|Q58FF8|H90B2_HUMAN	K.A(+144.10)DLIN(+.98)NLGTIAK(+144.10).F	N	47.44	1530.88	-7.7	766.442	2	99.86	58112	1	96	107	iTRAQ 4plex (K N-term); Deamidation (NQ)
sp|Q58FF8|H90B2_HUMAN	K.S(+144.10)IYY(+144.10)ITGESK(+144.10).E	Y	39.07	1591.88	-16	796.933	2	67.61	42141	1	258	267	iTRAQ 4plex (K N-term); iTRAQ 4plex (Y)
sp|Q58FF8|H90B2_HUMAN	K.Y(+144.10)IDQEELNK(+144.10).T	N	35.31	1438.75	12.3	480.597	3	61.51	39134	4	198	206	iTRAQ 4plex (Y); iTRAQ 4plex (K N-term)
sp|Q58FF8|H90B2_HUMAN	K.S(+144.10)LVSVTK(+144.10).E	Y	28.33	1020.64	11.5	511.332	2	54.21	35537	10	305	311	iTRAQ 4plex (K N-term)
sp|Q58FF8|H90B2_HUMAN	K.T(+144.10)K(+144.10)PIWTR.N	N	26.13	1188.72	22.8	397.256	3	46.01	31486	12	207	213	iTRAQ 4plex (K N-term)
tr|H7C2F8|H7C2F8_HUMAN	T.V(+144.10)TLSNR.I	Y	27.28	832.487	13.8	417.256	2	23.98	20620	10	23	28	iTRAQ 4plex (K N-term)
tr|H3BND8|H3BND8_HUMAN	V.V(+144.10)TLSNR.M	Y	27.28	832.487	13.8	417.256	2	23.98	20620	10	712	717	iTRAQ 4plex (K N-term)
sp|P10809|CH60_HUMAN	K.L(+144.10)VQDVANNTNEEAGDGTTTATVLAR.S	Y	103.96	2703.34	-18.8	902.104	3	96.64	56529	5	97	121	iTRAQ 4plex (K N-term)
sp|P10809|CH60_HUMAN	R.A(+144.10)LMLQGVDLLADAVAVTMGPK(+144.10).G	Y	83.09	2400.33	1.9	601.091	4	189.21	102429	11	38	58	iTRAQ 4plex (K N-term)
sp|P10809|CH60_HUMAN	R.G(+144.10)VMLAVDAVIAELK(+144.10)K(+144.10).Q	Y	78.94	1988.2	-5.2	663.737	3	177.17	96440	10	143	157	iTRAQ 4plex (K N-term)
sp|P10809|CH60_HUMAN	R.G(+144.10)VMLAVDAVIAELK(+144.10).K	Y	73.23	1716.01	-13.6	858.999	2	181.21	98437	11	143	156	iTRAQ 4plex (K N-term)
sp|P10809|CH60_HUMAN	R.A(+144.10)LM(+15.99)LQGVDLLADAVAVTMGPK(+144.10).G	Y	70.86	2416.33	-10.8	806.441	3	180.17	97919	8	38	58	iTRAQ 4plex (K N-term); Oxidation (M)
sp|P10809|CH60_HUMAN	R.A(+144.10)LMLQGVDLLADAVAVTM(+15.99)GPK(+144.10).G	Y	70.5	2416.33	-11.9	806.44	3	180.48	98072	7	38	58	iTRAQ 4plex (K N-term); Oxidation (M)
sp|P10809|CH60_HUMAN	R.T(+144.10)VIIEQSWGSPK(+144.10).V	Y	55.13	1631.91	8.3	544.981	3	90.74	53598	4	61	72	iTRAQ 4plex (K N-term)
sp|P10809|CH60_HUMAN	K.V(+144.10)GLQVVAVK(+144.10).A	Y	53.1	1199.78	1.5	600.898	2	90.13	53301	11	293	301	iTRAQ 4plex (K N-term)
sp|P10809|CH60_HUMAN	K.L(+144.10)SDGVAVLK(+144.10).V	Y	51.05	1188.73	1.4	595.372	2	81.93	49244	12	397	405	iTRAQ 4plex (K N-term)
sp|P10809|CH60_HUMAN	K.G(+144.10)ANPVEIR.R	Y	45.29	998.561	4.2	500.29	2	38.72	27906	8	134	141	iTRAQ 4plex (K N-term)
sp|P10809|CH60_HUMAN	R.V(+144.10)TDALNATR.A	Y	42.54	1103.6	0.8	552.809	2	48.19	32560	7	421	429	iTRAQ 4plex (K N-term)
sp|P10809|CH60_HUMAN	K.V(+144.10)GEVIVTK(+144.10).D	Y	39.11	1131.71	4.9	566.863	2	65.37	41037	7	345	352	iTRAQ 4plex (K N-term)
sp|P10809|CH60_HUMAN	K.I(+144.10)PAMTIAK(+144.10).N	Y	37.55	1131.69	5.6	566.855	2	88.15	52323	7	474	481	iTRAQ 4plex (K N-term)
sp|P10809|CH60_HUMAN	K.G(+144.10)IIDPTK(+144.10).V	Y	33.01	1030.62	-8.3	516.314	2	49.31	33108	7	517	523	iTRAQ 4plex (K N-term)
sp|P10809|CH60_HUMAN	K.D(+144.10)DAMLLK(+144.10).G	Y	32.06	1092.61	-6.4	547.306	2	62.69	39715	1	353	359	iTRAQ 4plex (K N-term)
sp|P10809|CH60_HUMAN	K.D(+144.10)GVTVAK(+144.10).S	Y	25.3	976.576	7.4	489.299	2	29.08	23144	5	76	82	iTRAQ 4plex (K N-term)
sp|P10809|CH60_HUMAN	K.A(+144.10)PGFGDNR.K	Y	25.28	976.483	3.7	489.25	2	27.42	22328	4	302	309	iTRAQ 4plex (K N-term)
tr|E7EXB4|E7EXB4_HUMAN	K.L(+144.10)VQDVANNTNEEAGDGTTTATVLAR.S	Y	103.96	2703.34	-18.8	902.104	3	96.64	56529	5	97	121	iTRAQ 4plex (K N-term)
tr|E7EXB4|E7EXB4_HUMAN	R.A(+144.10)LMLQGVDLLADAVAVTMGPK(+144.10).G	Y	83.09	2400.33	1.9	601.091	4	189.21	102429	11	38	58	iTRAQ 4plex (K N-term)
tr|E7EXB4|E7EXB4_HUMAN	R.G(+144.10)VMLAVDAVIAELK(+144.10)K(+144.10).Q	Y	78.94	1988.2	-5.2	663.737	3	177.17	96440	10	143	157	iTRAQ 4plex (K N-term)
tr|E7EXB4|E7EXB4_HUMAN	R.G(+144.10)VMLAVDAVIAELK(+144.10).K	Y	73.23	1716.01	-13.6	858.999	2	181.21	98437	11	143	156	iTRAQ 4plex (K N-term)
tr|E7EXB4|E7EXB4_HUMAN	R.A(+144.10)LM(+15.99)LQGVDLLADAVAVTMGPK(+144.10).G	Y	70.86	2416.33	-10.8	806.441	3	180.17	97919	8	38	58	iTRAQ 4plex (K N-term); Oxidation (M)
tr|E7EXB4|E7EXB4_HUMAN	R.A(+144.10)LMLQGVDLLADAVAVTM(+15.99)GPK(+144.10).G	Y	70.5	2416.33	-11.9	806.44	3	180.48	98072	7	38	58	iTRAQ 4plex (K N-term); Oxidation (M)
tr|E7EXB4|E7EXB4_HUMAN	R.T(+144.10)VIIEQSWGSPK(+144.10).V	Y	55.13	1631.91	8.3	544.981	3	90.74	53598	4	61	72	iTRAQ 4plex (K N-term)
tr|E7EXB4|E7EXB4_HUMAN	K.G(+144.10)ANPVEIR.R	Y	45.29	998.561	4.2	500.29	2	38.72	27906	8	134	141	iTRAQ 4plex (K N-term)
tr|E7EXB4|E7EXB4_HUMAN	K.D(+144.10)GVTVAK(+144.10).S	Y	25.3	976.576	7.4	489.299	2	29.08	23144	5	76	82	iTRAQ 4plex (K N-term)
tr|E7ESH4|E7ESH4_HUMAN	K.L(+144.10)VQDVANNTNEEAGDGTTTATVLAR.S	Y	103.96	2703.34	-18.8	902.104	3	96.64	56529	5	97	121	iTRAQ 4plex (K N-term)
tr|E7ESH4|E7ESH4_HUMAN	R.A(+144.10)LMLQGVDLLADAVAVTMGPK(+144.10).G	Y	83.09	2400.33	1.9	601.091	4	189.21	102429	11	38	58	iTRAQ 4plex (K N-term)
tr|E7ESH4|E7ESH4_HUMAN	R.G(+144.10)VMLAVDAVIAELK(+144.10)K(+144.10).Q	Y	78.94	1988.2	-5.2	663.737	3	177.17	96440	10	143	157	iTRAQ 4plex (K N-term)
tr|E7ESH4|E7ESH4_HUMAN	R.G(+144.10)VMLAVDAVIAELK(+144.10).K	Y	73.23	1716.01	-13.6	858.999	2	181.21	98437	11	143	156	iTRAQ 4plex (K N-term)
tr|E7ESH4|E7ESH4_HUMAN	R.A(+144.10)LM(+15.99)LQGVDLLADAVAVTMGPK(+144.10).G	Y	70.86	2416.33	-10.8	806.441	3	180.17	97919	8	38	58	iTRAQ 4plex (K N-term); Oxidation (M)
tr|E7ESH4|E7ESH4_HUMAN	R.A(+144.10)LMLQGVDLLADAVAVTM(+15.99)GPK(+144.10).G	Y	70.5	2416.33	-11.9	806.44	3	180.48	98072	7	38	58	iTRAQ 4plex (K N-term); Oxidation (M)
tr|E7ESH4|E7ESH4_HUMAN	R.T(+144.10)VIIEQSWGSPK(+144.10).V	Y	55.13	1631.91	8.3	544.981	3	90.74	53598	4	61	72	iTRAQ 4plex (K N-term)
tr|E7ESH4|E7ESH4_HUMAN	K.G(+144.10)ANPVEIR.R	Y	45.29	998.561	4.2	500.29	2	38.72	27906	8	134	141	iTRAQ 4plex (K N-term)
tr|E7ESH4|E7ESH4_HUMAN	K.D(+144.10)GVTVAK(+144.10).S	Y	25.3	976.576	7.4	489.299	2	29.08	23144	5	76	82	iTRAQ 4plex (K N-term)
tr|C9JL25|C9JL25_HUMAN	K.L(+144.10)VQDVANNTNEEAGDGTTTATVLAR.S	Y	103.96	2703.34	-18.8	902.104	3	96.64	56529	5	139	163	iTRAQ 4plex (K N-term)
tr|C9JL25|C9JL25_HUMAN	R.A(+144.10)LMLQGVDLLADAVAVTMGPK(+144.10).G	Y	83.09	2400.33	1.9	601.091	4	189.21	102429	11	80	100	iTRAQ 4plex (K N-term)
tr|C9JL25|C9JL25_HUMAN	R.A(+144.10)LM(+15.99)LQGVDLLADAVAVTMGPK(+144.10).G	Y	70.86	2416.33	-10.8	806.441	3	180.17	97919	8	80	100	iTRAQ 4plex (K N-term); Oxidation (M)
tr|C9JL25|C9JL25_HUMAN	R.A(+144.10)LMLQGVDLLADAVAVTM(+15.99)GPK(+144.10).G	Y	70.5	2416.33	-11.9	806.44	3	180.48	98072	7	80	100	iTRAQ 4plex (K N-term); Oxidation (M)
tr|C9JL25|C9JL25_HUMAN	R.T(+144.10)VIIEQSWGSPK(+144.10).V	Y	55.13	1631.91	8.3	544.981	3	90.74	53598	4	103	114	iTRAQ 4plex (K N-term)
tr|C9JL25|C9JL25_HUMAN	K.D(+144.10)GVTVAK(+144.10).S	Y	25.3	976.576	7.4	489.299	2	29.08	23144	5	118	124	iTRAQ 4plex (K N-term)
tr|C9JCQ4|C9JCQ4_HUMAN	R.A(+144.10)LMLQGVDLLADAVAVTMGPK(+144.10).G	Y	83.09	2400.33	1.9	601.091	4	189.21	102429	11	38	58	iTRAQ 4plex (K N-term)
tr|C9JCQ4|C9JCQ4_HUMAN	R.A(+144.10)LM(+15.99)LQGVDLLADAVAVTMGPK(+144.10).G	Y	70.86	2416.33	-10.8	806.441	3	180.17	97919	8	38	58	iTRAQ 4plex (K N-term); Oxidation (M)
tr|C9JCQ4|C9JCQ4_HUMAN	R.A(+144.10)LMLQGVDLLADAVAVTM(+15.99)GPK(+144.10).G	Y	70.5	2416.33	-11.9	806.44	3	180.48	98072	7	38	58	iTRAQ 4plex (K N-term); Oxidation (M)
tr|C9JCQ4|C9JCQ4_HUMAN	R.T(+144.10)VIIEQSWGSPK(+144.10).V	Y	55.13	1631.91	8.3	544.981	3	90.74	53598	4	61	72	iTRAQ 4plex (K N-term)
tr|C9JCQ4|C9JCQ4_HUMAN	K.D(+144.10)GVTVAK(+144.10).S	Y	25.3	976.576	7.4	489.299	2	29.08	23144	5	76	82	iTRAQ 4plex (K N-term)
tr|C9JL19|C9JL19_HUMAN	R.A(+144.10)LMLQGVDLLADAVAVTMGPK(+144.10).G	Y	83.09	2400.33	1.9	601.091	4	189.21	102429	11	38	58	iTRAQ 4plex (K N-term)
tr|C9JL19|C9JL19_HUMAN	R.A(+144.10)LM(+15.99)LQGVDLLADAVAVTMGPK(+144.10).G	Y	70.86	2416.33	-10.8	806.441	3	180.17	97919	8	38	58	iTRAQ 4plex (K N-term); Oxidation (M)
tr|C9JL19|C9JL19_HUMAN	R.A(+144.10)LMLQGVDLLADAVAVTM(+15.99)GPK(+144.10).G	Y	70.5	2416.33	-11.9	806.44	3	180.48	98072	7	38	58	iTRAQ 4plex (K N-term); Oxidation (M)
tr|C9JL19|C9JL19_HUMAN	R.T(+144.10)VIIEQSWGSPK(+144.10).V	Y	55.13	1631.91	8.3	544.981	3	90.74	53598	4	61	72	iTRAQ 4plex (K N-term)
tr|C9JL19|C9JL19_HUMAN	K.D(+144.10)GVTVAK(+144.10).S	Y	25.3	976.576	7.4	489.299	2	29.08	23144	5	76	82	iTRAQ 4plex (K N-term)
tr|C9J0S9|C9J0S9_HUMAN	R.A(+144.10)LMLQGVDLLADAVAVTMGPK(+144.10)	Y	83.09	2400.33	1.9	601.091	4	189.21	102429	11	38	58	iTRAQ 4plex (K N-term)
tr|C9J0S9|C9J0S9_HUMAN	R.A(+144.10)LM(+15.99)LQGVDLLADAVAVTMGPK(+144.10)	Y	70.86	2416.33	-10.8	806.441	3	180.17	97919	8	38	58	iTRAQ 4plex (K N-term); Oxidation (M)
tr|C9J0S9|C9J0S9_HUMAN	R.A(+144.10)LMLQGVDLLADAVAVTM(+15.99)GPK(+144.10)	Y	70.5	2416.33	-11.9	806.44	3	180.48	98072	7	38	58	iTRAQ 4plex (K N-term); Oxidation (M)
sp|P06733|ENOA_HUMAN	K.D(+144.10)ATNVGDEGGFAPNILENK(+144.10).E	Y	88.19	2248.12	4.8	563.039	4	104.69	60497	10	203	221	iTRAQ 4plex (K N-term)
sp|P06733|ENOA_HUMAN	K.F(+144.10)TASAGIQVVGDDLTVTNPK(+144.10).R	Y	79.57	2320.25	-11.5	774.414	3	124.13	70147	2	307	326	iTRAQ 4plex (K N-term)
sp|P06733|ENOA_HUMAN	R.S(+144.10)GETEDTFIADLVVGLC(+57.02)TGQIK(+144.10).T	N	77.46	2640.35	-17	881.11	3	174.98	95356	11	373	394	iTRAQ 4plex (K N-term); Carbamidomethylation
sp|P06733|ENOA_HUMAN	K.G(+144.10)VSKAVEHINK(+144.10).T	Y	69.44	1468.86	-16.1	490.618	3	52.89	34886	13	61	71	iTRAQ 4plex (K N-term)
sp|P06733|ENOA_HUMAN	R.A(+144.10)AVPSGASTGIYEALELR.D	N	67.26	1948.04	-22.4	975.004	2	127.62	71885	8	33	50	iTRAQ 4plex (K N-term)
sp|P06733|ENOA_HUMAN	K.V(+144.10)NQIGSVTESLQAC(+57.02)K(+144.10).L	N	60.83	1921.01	-7	641.341	3	91.36	53908	2	344	358	iTRAQ 4plex (K N-term); Carbamidomethylation
sp|P06733|ENOA_HUMAN	K.L(+144.10)MIEMDGTENK(+144.10).S	Y	57.02	1567.78	-19.3	784.881	2	85.29	50917	11	93	103	iTRAQ 4plex (K N-term)
sp|P06733|ENOA_HUMAN	K.T(+144.10)IAPALVSK(+144.10).K	Y	56.69	1186.75	0.4	594.382	2	75.84	46229	19	72	80	iTRAQ 4plex (K N-term)
sp|P06733|ENOA_HUMAN	R.I(+144.10)GAEVYHNLK(+144.10).N	Y	56.1	1430.81	11.5	477.949	3	72.54	44599	9	184	193	iTRAQ 4plex (K N-term)
sp|P06733|ENOA_HUMAN	K.FTASAGIQVVGDDLTVTNPK(+144.10).R	Y	55.61	2176.15	-7.3	726.385	3	117.89	67034	1	307	326	iTRAQ 4plex (K N-term)
sp|P06733|ENOA_HUMAN	K.AGY(+144.10)TDKVVIGM(+15.99)DVAASEFFR.S	Y	39.86	2335.16	-23.6	779.376	3	149.08	82576	3	234	253	iTRAQ 4plex (Y); Oxidation (M)
sp|P06733|ENOA_HUMAN	K.G(+144.10)VSK(+144.10)AVEHINK(+144.10).T	Y	39.35	1612.96	-4	404.245	4	41.48	29254	3	61	71	iTRAQ 4plex (K N-term)
sp|P06733|ENOA_HUMAN	R.I(+144.10)GAEVY(+144.10)HNLK(+144.10).N	Y	37.02	1574.91	24.6	394.744	4	61.44	39097	6	184	193	iTRAQ 4plex (K N-term); iTRAQ 4plex (Y)
sp|P06733|ENOA_HUMAN	R.I(+144.10)EEELGSK(+144.10).A	Y	36.64	1191.65	-1.9	596.834	2	53.78	35320	8	413	420	iTRAQ 4plex (K N-term)
sp|P06733|ENOA_HUMAN	K.G(+144.10)VPLYR.H	N	34.6	847.502	17.5	424.765	2	47.86	32399	18	127	132	iTRAQ 4plex (K N-term)
sp|P06733|ENOA_HUMAN	R.S(+144.10)GK(+144.10)YDLDFK(+144.10).S	Y	32.74	1503.82	-10.6	752.911	2	66.04	41371	3	254	262	iTRAQ 4plex (K N-term)
sp|P06733|ENOA_HUMAN	K.A(+144.10)GYTDKVVIGM(+15.99)DVAASEFFR.S	Y	31.65	2335.16	-24.4	779.376	3	148.99	82532	3	234	253	iTRAQ 4plex (K N-term); Oxidation (M)
sp|P06733|ENOA_HUMAN	K.AVEHINK(+144.10).T	Y	30.32	953.54	8.7	477.781	2	52.89	34885	2	65	71	iTRAQ 4plex (K N-term)
sp|P06733|ENOA_HUMAN	R.SGK(+144.10)Y(+144.10)DLDFK(+144.10).S	Y	28.84	1503.82	-10.4	752.911	2	66.11	41404	2	254	262	iTRAQ 4plex (K N-term); iTRAQ 4plex (Y)
sp|P06733|ENOA_HUMAN	K.YNQLLR.I	Y	28.47	805.445	13.8	403.735	2	31.79	24481	7	407	412
sp|P06733|ENOA_HUMAN	R.E(+144.10)IFDSR.G	Y	27.51	909.466	8.1	455.744	2	36.83	26978	17	10	15	iTRAQ 4plex (K N-term)
sp|P06733|ENOA_HUMAN	Y.KSFIKDYPVVSIEDPFDQ(+.98)DDWGAWQK(+144.10).F	Y	23.6	3257.57	-32.7	1086.83	3	167.12	91476	2	281	306	Deamidation (NQ); iTRAQ 4plex (K N-term)
sp|P06733|ENOA_HUMAN	K.S(+144.10)PDDPSR.Y	Y	23.56	916.435	10.9	459.23	2	7	12226	3	263	269	iTRAQ 4plex (K N-term)
sp|P06733|ENOA_HUMAN	K.Y(+144.10)NQLLR.I	Y	22.49	949.545	11.2	475.785	2	53.48	35174	6	407	412	iTRAQ 4plex (Y)
tr|K7EM90|K7EM90_HUMAN	K.G(+144.10)VSKAVEHINK(+144.10).T	Y	69.44	1468.86	-16.1	490.618	3	52.89	34886	13	61	71	iTRAQ 4plex (K N-term)
tr|K7EM90|K7EM90_HUMAN	R.A(+144.10)AVPSGASTGIYEALELR.D	N	67.26	1948.04	-22.4	975.004	2	127.62	71885	8	33	50	iTRAQ 4plex (K N-term)
tr|K7EM90|K7EM90_HUMAN	K.L(+144.10)MIEMDGTENK(+144.10).S	Y	57.02	1567.78	-19.3	784.881	2	85.29	50917	11	93	103	iTRAQ 4plex (K N-term)
tr|K7EM90|K7EM90_HUMAN	K.T(+144.10)IAPALVSK(+144.10).K	Y	56.69	1186.75	0.4	594.382	2	75.84	46229	19	72	80	iTRAQ 4plex (K N-term)
tr|K7EM90|K7EM90_HUMAN	R.I(+144.10)GAEVYHNLK(+144.10).N	Y	56.1	1430.81	11.5	477.949	3	72.54	44599	9	184	193	iTRAQ 4plex (K N-term)
tr|K7EM90|K7EM90_HUMAN	K.G(+144.10)VSK(+144.10)AVEHINK(+144.10).T	Y	39.35	1612.96	-4	404.245	4	41.48	29254	3	61	71	iTRAQ 4plex (K N-term)
tr|K7EM90|K7EM90_HUMAN	R.I(+144.10)GAEVY(+144.10)HNLK(+144.10).N	Y	37.02	1574.91	24.6	394.744	4	61.44	39097	6	184	193	iTRAQ 4plex (K N-term); iTRAQ 4plex (Y)
tr|K7EM90|K7EM90_HUMAN	K.G(+144.10)VPLYR.H	N	34.6	847.502	17.5	424.765	2	47.86	32399	18	127	132	iTRAQ 4plex (K N-term)
tr|K7EM90|K7EM90_HUMAN	K.AVEHINK(+144.10).T	Y	30.32	953.54	8.7	477.781	2	52.89	34885	2	65	71	iTRAQ 4plex (K N-term)
tr|K7EM90|K7EM90_HUMAN	R.E(+144.10)IFDSR.G	Y	27.51	909.466	8.1	455.744	2	36.83	26978	17	10	15	iTRAQ 4plex (K N-term)
sp|P68104|EF1A1_HUMAN	K.T(+144.10)HINIVVIGHVDSGK(+144.10).S	N	91.85	1876.07	-3.1	626.363	3	89.27	52873	9	6	20	iTRAQ 4plex (K N-term)
sp|P68104|EF1A1_HUMAN	R.E(+144.10)HALLAYTLGVK(+144.10).Q	N	74.78	1601.93	-12.4	801.965	2	105.06	60676	9	135	146	iTRAQ 4plex (K N-term)
sp|P68104|EF1A1_HUMAN	K.THINIVVIGHVDSGK(+144.10).S	N	74.04	1731.97	0	578.332	3	86.23	51377	11	6	20	iTRAQ 4plex (K N-term)
sp|P68104|EF1A1_HUMAN	K.Y(+144.10)YVTIIDAPGHR.D	Y	71.01	1547.82	10.1	516.952	3	92.71	54576	16	85	96	iTRAQ 4plex (Y)
sp|P68104|EF1A1_HUMAN	K.I(+144.10)GGIGTVPVGR.V	N	66.1	1168.7	0.6	585.359	2	80.86	48716	20	256	266	iTRAQ 4plex (K N-term)
sp|P68104|EF1A1_HUMAN	R.EHALLAYTLGVK(+144.10).Q	N	61.34	1457.83	-7.3	729.919	2	101.03	58684	3	135	146	iTRAQ 4plex (K N-term)
sp|P68104|EF1A1_HUMAN	K.N(+144.10)MITGTSQADC(+57.02)AVLIVAAGVGEFEAGISK(+144.10).N	N	61.27	3196.63	-12.2	800.155	4	178.62	97157	3	101	129	iTRAQ 4plex (K N-term); Carbamidomethylation
sp|P68104|EF1A1_HUMAN	K.IGY(+144.10)NPDTVAFVPISGWNGDN(+.98)MLEPSANMPWFK(+144.10).G	Y	57.24	3855.85	-22.3	964.948	4	179.88	97777	2	181	212	iTRAQ 4plex (Y); Deamidation (NQ); iTRAQ 4plex (K N-term)
sp|P68104|EF1A1_HUMAN	K.IGGIGTVPVGR.V	N	53.66	1024.6	9.1	513.313	2	68.9	42785	8	256	266
sp|P68104|EF1A1_HUMAN	K.I(+144.10)GYNPDTVAFVPISGWNGDNMLEPSANMPWFK(+144.10).G	Y	53.03	3854.86	-26.9	964.697	4	180.02	97845	2	181	212	iTRAQ 4plex (K N-term)
sp|P68104|EF1A1_HUMAN	R.Q(+144.10)TVAVGVIK(+144.10).A	N	52.85	1201.76	1.1	601.888	2	67.06	41874	18	431	439	iTRAQ 4plex (K N-term)
sp|P68104|EF1A1_HUMAN	K.Y(+144.10)Y(+144.10)VTIIDAPGHR.D	Y	50.15	1691.92	-1.4	564.98	3	81.47	49013	3	85	96	iTRAQ 4plex (Y)
sp|P68104|EF1A1_HUMAN	K.M(+144.10)DSTEPPYSQK(+144.10).R	Y	49.23	1569.75	6.2	524.262	3	45.96	31467	5	155	165	iTRAQ 4plex (K N-term)
sp|P68104|EF1A1_HUMAN	K.NMITGTSQADC(+57.02)AVLIVAAGVGEFEAGISK(+144.10).N	N	48.81	3052.53	-27.7	1018.49	3	178.27	96986	3	101	129	Carbamidomethylation; iTRAQ 4plex (K N-term)
sp|P68104|EF1A1_HUMAN	K.I(+144.10)GYNPDTVAFVPISGWNGDN(+.98)MLEPSANMPWFK(+144.10).G	Y	47.26	3855.85	-19.7	964.95	4	179.9	97788	2	181	212	iTRAQ 4plex (K N-term); Deamidation (NQ)
sp|P68104|EF1A1_HUMAN	R.L(+144.10)PLQDVYK(+144.10).I	N	46.76	1262.74	-0.7	632.379	2	93.63	55030	16	248	255	iTRAQ 4plex (K N-term)
sp|P68104|EF1A1_HUMAN	K.S(+144.10)TTTGHLIYK(+144.10).C	N	46.18	1407.79	10.1	470.276	3	48.07	32501	17	21	30	iTRAQ 4plex (K N-term)
sp|P68104|EF1A1_HUMAN	K.E(+144.10)VSTYIK(+144.10).K	Y	45.64	1126.64	3.6	564.331	2	52.34	34611	14	173	179	iTRAQ 4plex (K N-term)
sp|P68104|EF1A1_HUMAN	K.Q(+144.10)LIVGVNK(+144.10).M	N	45.41	1157.73	1	579.875	2	69.32	42997	15	147	154	iTRAQ 4plex (K N-term)
sp|P68104|EF1A1_HUMAN	K.Y(+144.10)(+144.10)YVTIIDAPGHR.D	Y	45.19	1691.92	-20.1	846.95	2	82.07	49312	1	85	96	iTRAQ 4plex (K N-term); iTRAQ 4plex (Y)
sp|P68104|EF1A1_HUMAN	R.Q(-17.03)TVAVGVIK(+144.10).A	N	44.17	1040.63	2.4	521.325	2	82.27	49415	18	431	439	Pyro-glu from Q; iTRAQ 4plex (K N-term)
sp|P68104|EF1A1_HUMAN	K.Q(-17.03)LIVGVNK(+144.10).M	N	44.1	996.607	14.7	499.318	2	86.16	51339	18	147	154	Pyro-glu from Q; iTRAQ 4plex (K N-term)
sp|P68104|EF1A1_HUMAN	R.VETGVLK(+144.10)PGMVVTFAPVNVTTEVK(+144.10).S	Y	43.86	2802.58	-19.8	935.181	3	147.78	81928	1	267	290	iTRAQ 4plex (K N-term)
sp|P68104|EF1A1_HUMAN	K.IGY(+144.10)NPDTVAFVPISGWNGDNMLEPSANMPWFK(+144.10).G	Y	43.45	3854.86	-22.2	964.702	4	179.92	97799	2	181	212	iTRAQ 4plex (Y); iTRAQ 4plex (K N-term)
sp|P68104|EF1A1_HUMAN	K.IGY(+144.10)NPDTVAFVPISGWNGDNM(+15.99)LEPSANMPWFK(+144.10).G	Y	43.12	3870.86	-11.7	968.711	4	176.08	95897	1	181	212	iTRAQ 4plex (Y); Oxidation (M); iTRAQ 4plex (K N-term)
sp|P68104|EF1A1_HUMAN	K.STTTGHLIYK(+144.10).C	N	37.15	1263.69	14.6	422.244	3	43.89	30442	7	21	30	iTRAQ 4plex (K N-term)
sp|P68104|EF1A1_HUMAN	R.G(+144.10)NVAGDSK(+144.10).N	Y	35.99	1034.56	1.6	518.286	2	9.25	13340	3	323	330	iTRAQ 4plex (K N-term)
sp|P68104|EF1A1_HUMAN	K.K(+144.10)IGY(+144.10)NPDTVAFVPISGWNGDNMLEPSANMPWFK(+144.10).G	Y	34.88	4127.06	-21.4	1032.75	4	175.7	95710	4	180	212	iTRAQ 4plex (K N-term); iTRAQ 4plex (Y)
sp|P68104|EF1A1_HUMAN	K.I(+144.10)GYNPDTVAFVPISGWNGDNMLEPSANM(+15.99)PWFK(+144.10).G	Y	34.31	3870.86	-27	968.696	4	175.3	95512	1	181	212	iTRAQ 4plex (K N-term); Oxidation (M)
sp|P68104|EF1A1_HUMAN	K.I(+144.10)GYNPDTVAFVPISGWN(+.98)GDNMLEPSANMPWFK(+144.10).G	Y	33.71	3855.85	-20.8	964.949	4	179.99	97833	1	181	212	iTRAQ 4plex (K N-term); Deamidation (NQ)
sp|P68104|EF1A1_HUMAN	K.E(+144.10)AAEMGK(+144.10).G	N	31.61	1022.53	0.9	512.271	2	19.82	18557	3	45	51	iTRAQ 4plex (K N-term)
sp|P68104|EF1A1_HUMAN	R.Y(+144.10)EEIVK(+144.10).E	Y	29.06	1067.61	4.6	534.813	2	53.19	35030	9	167	172	iTRAQ 4plex (Y); iTRAQ 4plex (K N-term)
sp|P68104|EF1A1_HUMAN	K.I(+144.10)GYNPDTVAFVPISGWNGDNM(+15.99)LEPSANMPWFK(+144.10).G	Y	24.4	3870.86	-26.9	968.696	4	176.1	95907	2	181	212	iTRAQ 4plex (K N-term); Oxidation (M)
sp|P68104|EF1A1_HUMAN	R.E(+144.10)HALLAY.T	N	22.62	959.518	4.7	480.768	2	64.42	40571	4	135	141	iTRAQ 4plex (K N-term)
sp|P68104|EF1A1_HUMAN	R.L(+144.10)PLQDVY(+144.10)K(+144.10).I	N	22.49	1406.84	-10.3	704.422	2	82.33	49444	1	248	255	iTRAQ 4plex (K N-term); iTRAQ 4plex (Y)
sp|Q5VTE0|EF1A3_HUMAN	K.T(+144.10)HINIVVIGHVDSGK(+144.10).S	N	91.85	1876.07	-3.1	626.363	3	89.27	52873	9	6	20	iTRAQ 4plex (K N-term)
sp|Q5VTE0|EF1A3_HUMAN	R.E(+144.10)HALLAYTLGVK(+144.10).Q	N	74.78	1601.93	-12.4	801.965	2	105.06	60676	9	135	146	iTRAQ 4plex (K N-term)
sp|Q5VTE0|EF1A3_HUMAN	K.THINIVVIGHVDSGK(+144.10).S	N	74.04	1731.97	0	578.332	3	86.23	51377	11	6	20	iTRAQ 4plex (K N-term)
sp|Q5VTE0|EF1A3_HUMAN	K.Y(+144.10)YVTIIDAPGHR.D	Y	71.01	1547.82	10.1	516.952	3	92.71	54576	16	85	96	iTRAQ 4plex (Y)
sp|Q5VTE0|EF1A3_HUMAN	K.I(+144.10)GGIGTVPVGR.V	N	66.1	1168.7	0.6	585.359	2	80.86	48716	20	256	266	iTRAQ 4plex (K N-term)
sp|Q5VTE0|EF1A3_HUMAN	R.EHALLAYTLGVK(+144.10).Q	N	61.34	1457.83	-7.3	729.919	2	101.03	58684	3	135	146	iTRAQ 4plex (K N-term)
sp|Q5VTE0|EF1A3_HUMAN	K.N(+144.10)MITGTSQADC(+57.02)AVLIVAAGVGEFEAGISK(+144.10).N	N	61.27	3196.63	-12.2	800.155	4	178.62	97157	3	101	129	iTRAQ 4plex (K N-term); Carbamidomethylation
sp|Q5VTE0|EF1A3_HUMAN	K.IGY(+144.10)NPDTVAFVPISGWNGDN(+.98)MLEPSANMPWFK(+144.10).G	Y	57.24	3855.85	-22.3	964.948	4	179.88	97777	2	181	212	iTRAQ 4plex (Y); Deamidation (NQ); iTRAQ 4plex (K N-term)
sp|Q5VTE0|EF1A3_HUMAN	K.IGGIGTVPVGR.V	N	53.66	1024.6	9.1	513.313	2	68.9	42785	8	256	266
sp|Q5VTE0|EF1A3_HUMAN	K.I(+144.10)GYNPDTVAFVPISGWNGDNMLEPSANMPWFK(+144.10).G	Y	53.03	3854.86	-26.9	964.697	4	180.02	97845	2	181	212	iTRAQ 4plex (K N-term)
sp|Q5VTE0|EF1A3_HUMAN	R.Q(+144.10)TVAVGVIK(+144.10).A	N	52.85	1201.76	1.1	601.888	2	67.06	41874	18	431	439	iTRAQ 4plex (K N-term)
sp|Q5VTE0|EF1A3_HUMAN	K.Y(+144.10)Y(+144.10)VTIIDAPGHR.D	Y	50.15	1691.92	-1.4	564.98	3	81.47	49013	3	85	96	iTRAQ 4plex (Y)
sp|Q5VTE0|EF1A3_HUMAN	K.M(+144.10)DSTEPPYSQK(+144.10).R	Y	49.23	1569.75	6.2	524.262	3	45.96	31467	5	155	165	iTRAQ 4plex (K N-term)
sp|Q5VTE0|EF1A3_HUMAN	K.NMITGTSQADC(+57.02)AVLIVAAGVGEFEAGISK(+144.10).N	N	48.81	3052.53	-27.7	1018.49	3	178.27	96986	3	101	129	Carbamidomethylation; iTRAQ 4plex (K N-term)
sp|Q5VTE0|EF1A3_HUMAN	K.I(+144.10)GYNPDTVAFVPISGWNGDN(+.98)MLEPSANMPWFK(+144.10).G	Y	47.26	3855.85	-19.7	964.95	4	179.9	97788	2	181	212	iTRAQ 4plex (K N-term); Deamidation (NQ)
sp|Q5VTE0|EF1A3_HUMAN	R.L(+144.10)PLQDVYK(+144.10).I	N	46.76	1262.74	-0.7	632.379	2	93.63	55030	16	248	255	iTRAQ 4plex (K N-term)
sp|Q5VTE0|EF1A3_HUMAN	K.S(+144.10)TTTGHLIYK(+144.10).C	N	46.18	1407.79	10.1	470.276	3	48.07	32501	17	21	30	iTRAQ 4plex (K N-term)
sp|Q5VTE0|EF1A3_HUMAN	K.E(+144.10)VSTYIK(+144.10).K	Y	45.64	1126.64	3.6	564.331	2	52.34	34611	14	173	179	iTRAQ 4plex (K N-term)
sp|Q5VTE0|EF1A3_HUMAN	K.Q(+144.10)LIVGVNK(+144.10).M	N	45.41	1157.73	1	579.875	2	69.32	42997	15	147	154	iTRAQ 4plex (K N-term)
sp|Q5VTE0|EF1A3_HUMAN	K.Y(+144.10)(+144.10)YVTIIDAPGHR.D	Y	45.19	1691.92	-20.1	846.95	2	82.07	49312	1	85	96	iTRAQ 4plex (K N-term); iTRAQ 4plex (Y)
sp|Q5VTE0|EF1A3_HUMAN	R.Q(-17.03)TVAVGVIK(+144.10).A	N	44.17	1040.63	2.4	521.325	2	82.27	49415	18	431	439	Pyro-glu from Q; iTRAQ 4plex (K N-term)
sp|Q5VTE0|EF1A3_HUMAN	K.Q(-17.03)LIVGVNK(+144.10).M	N	44.1	996.607	14.7	499.318	2	86.16	51339	18	147	154	Pyro-glu from Q; iTRAQ 4plex (K N-term)
sp|Q5VTE0|EF1A3_HUMAN	R.VETGVLK(+144.10)PGMVVTFAPVNVTTEVK(+144.10).S	Y	43.86	2802.58	-19.8	935.181	3	147.78	81928	1	267	290	iTRAQ 4plex (K N-term)
sp|Q5VTE0|EF1A3_HUMAN	K.IGY(+144.10)NPDTVAFVPISGWNGDNMLEPSANMPWFK(+144.10).G	Y	43.45	3854.86	-22.2	964.702	4	179.92	97799	2	181	212	iTRAQ 4plex (Y); iTRAQ 4plex (K N-term)
sp|Q5VTE0|EF1A3_HUMAN	K.IGY(+144.10)NPDTVAFVPISGWNGDNM(+15.99)LEPSANMPWFK(+144.10).G	Y	43.12	3870.86	-11.7	968.711	4	176.08	95897	1	181	212	iTRAQ 4plex (Y); Oxidation (M); iTRAQ 4plex (K N-term)
sp|Q5VTE0|EF1A3_HUMAN	K.STTTGHLIYK(+144.10).C	N	37.15	1263.69	14.6	422.244	3	43.89	30442	7	21	30	iTRAQ 4plex (K N-term)
sp|Q5VTE0|EF1A3_HUMAN	R.G(+144.10)NVAGDSK(+144.10).N	Y	35.99	1034.56	1.6	518.286	2	9.25	13340	3	323	330	iTRAQ 4plex (K N-term)
sp|Q5VTE0|EF1A3_HUMAN	K.K(+144.10)IGY(+144.10)NPDTVAFVPISGWNGDNMLEPSANMPWFK(+144.10).G	Y	34.88	4127.06	-21.4	1032.75	4	175.7	95710	4	180	212	iTRAQ 4plex (K N-term); iTRAQ 4plex (Y)
sp|Q5VTE0|EF1A3_HUMAN	K.I(+144.10)GYNPDTVAFVPISGWNGDNMLEPSANM(+15.99)PWFK(+144.10).G	Y	34.31	3870.86	-27	968.696	4	175.3	95512	1	181	212	iTRAQ 4plex (K N-term); Oxidation (M)
sp|Q5VTE0|EF1A3_HUMAN	K.I(+144.10)GYNPDTVAFVPISGWN(+.98)GDNMLEPSANMPWFK(+144.10).G	Y	33.71	3855.85	-20.8	964.949	4	179.99	97833	1	181	212	iTRAQ 4plex (K N-term); Deamidation (NQ)
sp|Q5VTE0|EF1A3_HUMAN	K.E(+144.10)AAEMGK(+144.10).G	N	31.61	1022.53	0.9	512.271	2	19.82	18557	3	45	51	iTRAQ 4plex (K N-term)
sp|Q5VTE0|EF1A3_HUMAN	R.Y(+144.10)EEIVK(+144.10).E	Y	29.06	1067.61	4.6	534.813	2	53.19	35030	9	167	172	iTRAQ 4plex (Y); iTRAQ 4plex (K N-term)
sp|Q5VTE0|EF1A3_HUMAN	K.I(+144.10)GYNPDTVAFVPISGWNGDNM(+15.99)LEPSANMPWFK(+144.10).G	Y	24.4	3870.86	-26.9	968.696	4	176.1	95907	2	181	212	iTRAQ 4plex (K N-term); Oxidation (M)
sp|Q5VTE0|EF1A3_HUMAN	R.E(+144.10)HALLAY.T	N	22.62	959.518	4.7	480.768	2	64.42	40571	4	135	141	iTRAQ 4plex (K N-term)
sp|Q5VTE0|EF1A3_HUMAN	R.L(+144.10)PLQDVY(+144.10)K(+144.10).I	N	22.49	1406.84	-10.3	704.422	2	82.33	49444	1	248	255	iTRAQ 4plex (K N-term); iTRAQ 4plex (Y)
tr|A0A087WVQ9|A0A087WVQ9_HUMAN	K.T(+144.10)HINIVVIGHVDSGK(+144.10).S	N	91.85	1876.07	-3.1	626.363	3	89.27	52873	9	6	20	iTRAQ 4plex (K N-term)
tr|A0A087WVQ9|A0A087WVQ9_HUMAN	K.THINIVVIGHVDSGK(+144.10).S	N	74.04	1731.97	0	578.332	3	86.23	51377	11	6	20	iTRAQ 4plex (K N-term)
tr|A0A087WVQ9|A0A087WVQ9_HUMAN	K.Y(+144.10)YVTIIDAPGHR.D	Y	71.01	1547.82	10.1	516.952	3	92.71	54576	16	85	96	iTRAQ 4plex (Y)
tr|A0A087WVQ9|A0A087WVQ9_HUMAN	K.I(+144.10)GGIGTVPVGR.V	N	66.1	1168.7	0.6	585.359	2	80.86	48716	20	235	245	iTRAQ 4plex (K N-term)
tr|A0A087WVQ9|A0A087WVQ9_HUMAN	K.N(+144.10)MITGTSQADC(+57.02)AVLIVAAGVGEFEAGISK(+144.10).N	N	61.27	3196.63	-12.2	800.155	4	178.62	97157	3	101	129	iTRAQ 4plex (K N-term); Carbamidomethylation
tr|A0A087WVQ9|A0A087WVQ9_HUMAN	K.IGY(+144.10)NPDTVAFVPISGWNGDN(+.98)MLEPSANMPWFK(+144.10).G	Y	57.24	3855.85	-22.3	964.948	4	179.88	97777	2	160	191	iTRAQ 4plex (Y); Deamidation (NQ); iTRAQ 4plex (K N-term)
tr|A0A087WVQ9|A0A087WVQ9_HUMAN	K.IGGIGTVPVGR.V	N	53.66	1024.6	9.1	513.313	2	68.9	42785	8	235	245
tr|A0A087WVQ9|A0A087WVQ9_HUMAN	K.I(+144.10)GYNPDTVAFVPISGWNGDNMLEPSANMPWFK(+144.10).G	Y	53.03	3854.86	-26.9	964.697	4	180.02	97845	2	160	191	iTRAQ 4plex (K N-term)
tr|A0A087WVQ9|A0A087WVQ9_HUMAN	R.Q(+144.10)TVAVGVIK(+144.10).A	N	52.85	1201.76	1.1	601.888	2	67.06	41874	18	410	418	iTRAQ 4plex (K N-term)
tr|A0A087WVQ9|A0A087WVQ9_HUMAN	K.Y(+144.10)Y(+144.10)VTIIDAPGHR.D	Y	50.15	1691.92	-1.4	564.98	3	81.47	49013	3	85	96	iTRAQ 4plex (Y)
tr|A0A087WVQ9|A0A087WVQ9_HUMAN	K.NMITGTSQADC(+57.02)AVLIVAAGVGEFEAGISK(+144.10).N	N	48.81	3052.53	-27.7	1018.49	3	178.27	96986	3	101	129	Carbamidomethylation; iTRAQ 4plex (K N-term)
tr|A0A087WVQ9|A0A087WVQ9_HUMAN	K.I(+144.10)GYNPDTVAFVPISGWNGDN(+.98)MLEPSANMPWFK(+144.10).G	Y	47.26	3855.85	-19.7	964.95	4	179.9	97788	2	160	191	iTRAQ 4plex (K N-term); Deamidation (NQ)
tr|A0A087WVQ9|A0A087WVQ9_HUMAN	R.L(+144.10)PLQDVYK(+144.10).I	N	46.76	1262.74	-0.7	632.379	2	93.63	55030	16	227	234	iTRAQ 4plex (K N-term)
tr|A0A087WVQ9|A0A087WVQ9_HUMAN	K.S(+144.10)TTTGHLIYK(+144.10).C	N	46.18	1407.79	10.1	470.276	3	48.07	32501	17	21	30	iTRAQ 4plex (K N-term)
tr|A0A087WVQ9|A0A087WVQ9_HUMAN	K.E(+144.10)VSTYIK(+144.10).K	Y	45.64	1126.64	3.6	564.331	2	52.34	34611	14	152	158	iTRAQ 4plex (K N-term)
tr|A0A087WVQ9|A0A087WVQ9_HUMAN	K.Y(+144.10)(+144.10)YVTIIDAPGHR.D	Y	45.19	1691.92	-20.1	846.95	2	82.07	49312	1	85	96	iTRAQ 4plex (K N-term); iTRAQ 4plex (Y)
tr|A0A087WVQ9|A0A087WVQ9_HUMAN	R.Q(-17.03)TVAVGVIK(+144.10).A	N	44.17	1040.63	2.4	521.325	2	82.27	49415	18	410	418	Pyro-glu from Q; iTRAQ 4plex (K N-term)
tr|A0A087WVQ9|A0A087WVQ9_HUMAN	R.VETGVLK(+144.10)PGMVVTFAPVNVTTEVK(+144.10).S	Y	43.86	2802.58	-19.8	935.181	3	147.78	81928	1	246	269	iTRAQ 4plex (K N-term)
tr|A0A087WVQ9|A0A087WVQ9_HUMAN	K.IGY(+144.10)NPDTVAFVPISGWNGDNMLEPSANMPWFK(+144.10).G	Y	43.45	3854.86	-22.2	964.702	4	179.92	97799	2	160	191	iTRAQ 4plex (Y); iTRAQ 4plex (K N-term)
tr|A0A087WVQ9|A0A087WVQ9_HUMAN	K.IGY(+144.10)NPDTVAFVPISGWNGDNM(+15.99)LEPSANMPWFK(+144.10).G	Y	43.12	3870.86	-11.7	968.711	4	176.08	95897	1	160	191	iTRAQ 4plex (Y); Oxidation (M); iTRAQ 4plex (K N-term)
tr|A0A087WVQ9|A0A087WVQ9_HUMAN	K.STTTGHLIYK(+144.10).C	N	37.15	1263.69	14.6	422.244	3	43.89	30442	7	21	30	iTRAQ 4plex (K N-term)
tr|A0A087WVQ9|A0A087WVQ9_HUMAN	R.G(+144.10)NVAGDSK(+144.10).N	Y	35.99	1034.56	1.6	518.286	2	9.25	13340	3	302	309	iTRAQ 4plex (K N-term)
tr|A0A087WVQ9|A0A087WVQ9_HUMAN	K.K(+144.10)IGY(+144.10)NPDTVAFVPISGWNGDNMLEPSANMPWFK(+144.10).G	Y	34.88	4127.06	-21.4	1032.75	4	175.7	95710	4	159	191	iTRAQ 4plex (K N-term); iTRAQ 4plex (Y)
tr|A0A087WVQ9|A0A087WVQ9_HUMAN	K.I(+144.10)GYNPDTVAFVPISGWNGDNMLEPSANM(+15.99)PWFK(+144.10).G	Y	34.31	3870.86	-27	968.696	4	175.3	95512	1	160	191	iTRAQ 4plex (K N-term); Oxidation (M)
tr|A0A087WVQ9|A0A087WVQ9_HUMAN	K.I(+144.10)GYNPDTVAFVPISGWN(+.98)GDNMLEPSANMPWFK(+144.10).G	Y	33.71	3855.85	-20.8	964.949	4	179.99	97833	1	160	191	iTRAQ 4plex (K N-term); Deamidation (NQ)
tr|A0A087WVQ9|A0A087WVQ9_HUMAN	K.E(+144.10)AAEMGK(+144.10).G	N	31.61	1022.53	0.9	512.271	2	19.82	18557	3	45	51	iTRAQ 4plex (K N-term)
tr|A0A087WVQ9|A0A087WVQ9_HUMAN	R.Y(+144.10)EEIVK(+144.10).E	Y	29.06	1067.61	4.6	534.813	2	53.19	35030	9	146	151	iTRAQ 4plex (Y); iTRAQ 4plex (K N-term)
tr|A0A087WVQ9|A0A087WVQ9_HUMAN	K.I(+144.10)GYNPDTVAFVPISGWNGDNM(+15.99)LEPSANMPWFK(+144.10).G	Y	24.4	3870.86	-26.9	968.696	4	176.1	95907	2	160	191	iTRAQ 4plex (K N-term); Oxidation (M)
tr|A0A087WVQ9|A0A087WVQ9_HUMAN	R.E(+144.10)HALLAY.T	N	22.62	959.518	4.7	480.768	2	64.42	40571	4	135	141	iTRAQ 4plex (K N-term)
tr|A0A087WVQ9|A0A087WVQ9_HUMAN	R.L(+144.10)PLQDVY(+144.10)K(+144.10).I	N	22.49	1406.84	-10.3	704.422	2	82.33	49444	1	227	234	iTRAQ 4plex (K N-term); iTRAQ 4plex (Y)
tr|A0A087WV01|A0A087WV01_HUMAN	K.T(+144.10)HINIVVIGHVDSGK(+144.10).S	N	91.85	1876.07	-3.1	626.363	3	89.27	52873	9	6	20	iTRAQ 4plex (K N-term)
tr|A0A087WV01|A0A087WV01_HUMAN	R.E(+144.10)HALLAYTLGVK(+144.10).Q	N	74.78	1601.93	-12.4	801.965	2	105.06	60676	9	135	146	iTRAQ 4plex (K N-term)
tr|A0A087WV01|A0A087WV01_HUMAN	K.THINIVVIGHVDSGK(+144.10).S	N	74.04	1731.97	0	578.332	3	86.23	51377	11	6	20	iTRAQ 4plex (K N-term)
tr|A0A087WV01|A0A087WV01_HUMAN	K.Y(+144.10)YVTIIDAPGHR.D	Y	71.01	1547.82	10.1	516.952	3	92.71	54576	16	85	96	iTRAQ 4plex (Y)
tr|A0A087WV01|A0A087WV01_HUMAN	R.EHALLAYTLGVK(+144.10).Q	N	61.34	1457.83	-7.3	729.919	2	101.03	58684	3	135	146	iTRAQ 4plex (K N-term)
tr|A0A087WV01|A0A087WV01_HUMAN	K.N(+144.10)MITGTSQADC(+57.02)AVLIVAAGVGEFEAGISK(+144.10).N	N	61.27	3196.63	-12.2	800.155	4	178.62	97157	3	101	129	iTRAQ 4plex (K N-term); Carbamidomethylation
tr|A0A087WV01|A0A087WV01_HUMAN	K.IGY(+144.10)NPDTVAFVPISGWNGDN(+.98)MLEPSANMPWFK(+144.10).G	Y	57.24	3855.85	-22.3	964.948	4	179.88	97777	2	181	212	iTRAQ 4plex (Y); Deamidation (NQ); iTRAQ 4plex (K N-term)
tr|A0A087WV01|A0A087WV01_HUMAN	K.I(+144.10)GYNPDTVAFVPISGWNGDNMLEPSANMPWFK(+144.10).G	Y	53.03	3854.86	-26.9	964.697	4	180.02	97845	2	181	212	iTRAQ 4plex (K N-term)
tr|A0A087WV01|A0A087WV01_HUMAN	K.Y(+144.10)Y(+144.10)VTIIDAPGHR.D	Y	50.15	1691.92	-1.4	564.98	3	81.47	49013	3	85	96	iTRAQ 4plex (Y)
tr|A0A087WV01|A0A087WV01_HUMAN	K.M(+144.10)DSTEPPYSQK(+144.10).R	Y	49.23	1569.75	6.2	524.262	3	45.96	31467	5	155	165	iTRAQ 4plex (K N-term)
tr|A0A087WV01|A0A087WV01_HUMAN	K.NMITGTSQADC(+57.02)AVLIVAAGVGEFEAGISK(+144.10).N	N	48.81	3052.53	-27.7	1018.49	3	178.27	96986	3	101	129	Carbamidomethylation; iTRAQ 4plex (K N-term)
tr|A0A087WV01|A0A087WV01_HUMAN	K.I(+144.10)GYNPDTVAFVPISGWNGDN(+.98)MLEPSANMPWFK(+144.10).G	Y	47.26	3855.85	-19.7	964.95	4	179.9	97788	2	181	212	iTRAQ 4plex (K N-term); Deamidation (NQ)
tr|A0A087WV01|A0A087WV01_HUMAN	R.L(+144.10)PLQDVYK(+144.10).I	N	46.76	1262.74	-0.7	632.379	2	93.63	55030	16	248	255	iTRAQ 4plex (K N-term)
tr|A0A087WV01|A0A087WV01_HUMAN	K.S(+144.10)TTTGHLIYK(+144.10).C	N	46.18	1407.79	10.1	470.276	3	48.07	32501	17	21	30	iTRAQ 4plex (K N-term)
tr|A0A087WV01|A0A087WV01_HUMAN	K.E(+144.10)VSTYIK(+144.10).K	Y	45.64	1126.64	3.6	564.331	2	52.34	34611	14	173	179	iTRAQ 4plex (K N-term)
tr|A0A087WV01|A0A087WV01_HUMAN	K.Q(+144.10)LIVGVNK(+144.10).M	N	45.41	1157.73	1	579.875	2	69.32	42997	15	147	154	iTRAQ 4plex (K N-term)
tr|A0A087WV01|A0A087WV01_HUMAN	K.Y(+144.10)(+144.10)YVTIIDAPGHR.D	Y	45.19	1691.92	-20.1	846.95	2	82.07	49312	1	85	96	iTRAQ 4plex (K N-term); iTRAQ 4plex (Y)
tr|A0A087WV01|A0A087WV01_HUMAN	K.Q(-17.03)LIVGVNK(+144.10).M	N	44.1	996.607	14.7	499.318	2	86.16	51339	18	147	154	Pyro-glu from Q; iTRAQ 4plex (K N-term)
tr|A0A087WV01|A0A087WV01_HUMAN	K.IGY(+144.10)NPDTVAFVPISGWNGDNMLEPSANMPWFK(+144.10).G	Y	43.45	3854.86	-22.2	964.702	4	179.92	97799	2	181	212	iTRAQ 4plex (Y); iTRAQ 4plex (K N-term)
tr|A0A087WV01|A0A087WV01_HUMAN	K.IGY(+144.10)NPDTVAFVPISGWNGDNM(+15.99)LEPSANMPWFK(+144.10).G	Y	43.12	3870.86	-11.7	968.711	4	176.08	95897	1	181	212	iTRAQ 4plex (Y); Oxidation (M); iTRAQ 4plex (K N-term)
tr|A0A087WV01|A0A087WV01_HUMAN	K.STTTGHLIYK(+144.10).C	N	37.15	1263.69	14.6	422.244	3	43.89	30442	7	21	30	iTRAQ 4plex (K N-term)
tr|A0A087WV01|A0A087WV01_HUMAN	R.G(+144.10)NVAGDSK(+144.10).N	Y	35.99	1034.56	1.6	518.286	2	9.25	13340	3	321	328	iTRAQ 4plex (K N-term)
tr|A0A087WV01|A0A087WV01_HUMAN	K.K(+144.10)IGY(+144.10)NPDTVAFVPISGWNGDNMLEPSANMPWFK(+144.10).G	Y	34.88	4127.06	-21.4	1032.75	4	175.7	95710	4	180	212	iTRAQ 4plex (K N-term); iTRAQ 4plex (Y)
tr|A0A087WV01|A0A087WV01_HUMAN	K.I(+144.10)GYNPDTVAFVPISGWNGDNMLEPSANM(+15.99)PWFK(+144.10).G	Y	34.31	3870.86	-27	968.696	4	175.3	95512	1	181	212	iTRAQ 4plex (K N-term); Oxidation (M)
tr|A0A087WV01|A0A087WV01_HUMAN	K.I(+144.10)GYNPDTVAFVPISGWN(+.98)GDNMLEPSANMPWFK(+144.10).G	Y	33.71	3855.85	-20.8	964.949	4	179.99	97833	1	181	212	iTRAQ 4plex (K N-term); Deamidation (NQ)
tr|A0A087WV01|A0A087WV01_HUMAN	K.E(+144.10)AAEMGK(+144.10).G	N	31.61	1022.53	0.9	512.271	2	19.82	18557	3	45	51	iTRAQ 4plex (K N-term)
tr|A0A087WV01|A0A087WV01_HUMAN	R.Y(+144.10)EEIVK(+144.10).E	Y	29.06	1067.61	4.6	534.813	2	53.19	35030	9	167	172	iTRAQ 4plex (Y); iTRAQ 4plex (K N-term)
tr|A0A087WV01|A0A087WV01_HUMAN	K.I(+144.10)GYNPDTVAFVPISGWNGDNM(+15.99)LEPSANMPWFK(+144.10).G	Y	24.4	3870.86	-26.9	968.696	4	176.1	95907	2	181	212	iTRAQ 4plex (K N-term); Oxidation (M)
tr|A0A087WV01|A0A087WV01_HUMAN	R.E(+144.10)HALLAY.T	N	22.62	959.518	4.7	480.768	2	64.42	40571	4	135	141	iTRAQ 4plex (K N-term)
tr|A0A087WV01|A0A087WV01_HUMAN	R.L(+144.10)PLQDVY(+144.10)K(+144.10).I	N	22.49	1406.84	-10.3	704.422	2	82.33	49444	1	248	255	iTRAQ 4plex (K N-term); iTRAQ 4plex (Y)
tr|Q5JR01|Q5JR01_HUMAN	K.T(+144.10)HINIVVIGHVDSGK(+144.10).S	N	91.85	1876.07	-3.1	626.363	3	89.27	52873	9	6	20	iTRAQ 4plex (K N-term)
tr|Q5JR01|Q5JR01_HUMAN	K.THINIVVIGHVDSGK(+144.10).S	N	74.04	1731.97	0	578.332	3	86.23	51377	11	6	20	iTRAQ 4plex (K N-term)
tr|Q5JR01|Q5JR01_HUMAN	K.Y(+144.10)YVTIIDAPGHR.D	Y	71.01	1547.82	10.1	516.952	3	92.71	54576	16	85	96	iTRAQ 4plex (Y)
tr|Q5JR01|Q5JR01_HUMAN	K.N(+144.10)MITGTSQADC(+57.02)AVLIVAAGVGEFEAGISK(+144.10).N	N	61.27	3196.63	-12.2	800.155	4	178.62	97157	3	101	129	iTRAQ 4plex (K N-term); Carbamidomethylation
tr|Q5JR01|Q5JR01_HUMAN	K.Y(+144.10)Y(+144.10)VTIIDAPGHR.D	Y	50.15	1691.92	-1.4	564.98	3	81.47	49013	3	85	96	iTRAQ 4plex (Y)
tr|Q5JR01|Q5JR01_HUMAN	K.NMITGTSQADC(+57.02)AVLIVAAGVGEFEAGISK(+144.10).N	N	48.81	3052.53	-27.7	1018.49	3	178.27	96986	3	101	129	Carbamidomethylation; iTRAQ 4plex (K N-term)
tr|Q5JR01|Q5JR01_HUMAN	K.S(+144.10)TTTGHLIYK(+144.10).C	N	46.18	1407.79	10.1	470.276	3	48.07	32501	17	21	30	iTRAQ 4plex (K N-term)
tr|Q5JR01|Q5JR01_HUMAN	K.Y(+144.10)(+144.10)YVTIIDAPGHR.D	Y	45.19	1691.92	-20.1	846.95	2	82.07	49312	1	85	96	iTRAQ 4plex (K N-term); iTRAQ 4plex (Y)
tr|Q5JR01|Q5JR01_HUMAN	K.STTTGHLIYK(+144.10).C	N	37.15	1263.69	14.6	422.244	3	43.89	30442	7	21	30	iTRAQ 4plex (K N-term)
tr|Q5JR01|Q5JR01_HUMAN	K.E(+144.10)AAEMGK(+144.10).G	N	31.61	1022.53	0.9	512.271	2	19.82	18557	3	45	51	iTRAQ 4plex (K N-term)
tr|Q5JR01|Q5JR01_HUMAN	R.E(+144.10)HALLAY.T	N	22.62	959.518	4.7	480.768	2	64.42	40571	4	135	141	iTRAQ 4plex (K N-term)
tr|A6PW80|A6PW80_HUMAN	K.T(+144.10)HINIVVIGHVDSGK(+144.10).S	N	91.85	1876.07	-3.1	626.363	3	89.27	52873	9	6	20	iTRAQ 4plex (K N-term)
tr|A6PW80|A6PW80_HUMAN	K.THINIVVIGHVDSGK(+144.10).S	N	74.04	1731.97	0	578.332	3	86.23	51377	11	6	20	iTRAQ 4plex (K N-term)
tr|A6PW80|A6PW80_HUMAN	K.Y(+144.10)YVTIIDAPGHR.D	Y	71.01	1547.82	10.1	516.952	3	92.71	54576	16	85	96	iTRAQ 4plex (Y)
tr|A6PW80|A6PW80_HUMAN	K.Y(+144.10)Y(+144.10)VTIIDAPGHR.D	Y	50.15	1691.92	-1.4	564.98	3	81.47	49013	3	85	96	iTRAQ 4plex (Y)
tr|A6PW80|A6PW80_HUMAN	K.S(+144.10)TTTGHLIYK(+144.10).C	N	46.18	1407.79	10.1	470.276	3	48.07	32501	17	21	30	iTRAQ 4plex (K N-term)
tr|A6PW80|A6PW80_HUMAN	K.Y(+144.10)(+144.10)YVTIIDAPGHR.D	Y	45.19	1691.92	-20.1	846.95	2	82.07	49312	1	85	96	iTRAQ 4plex (K N-term); iTRAQ 4plex (Y)
tr|A6PW80|A6PW80_HUMAN	K.STTTGHLIYK(+144.10).C	N	37.15	1263.69	14.6	422.244	3	43.89	30442	7	21	30	iTRAQ 4plex (K N-term)
tr|A6PW80|A6PW80_HUMAN	K.E(+144.10)AAEMGK(+144.10).G	N	31.61	1022.53	0.9	512.271	2	19.82	18557	3	45	51	iTRAQ 4plex (K N-term)
sp|Q9BQE3|TBA1C_HUMAN	R.F(+144.10)DGALNVDLTEFQTNLVPYPR.I	N	88.34	2552.3	-16.9	851.76	3	167.23	91528	9	244	264	iTRAQ 4plex (K N-term)
sp|Q9BQE3|TBA1C_HUMAN	K.T(+144.10)IGGGDDSFNTFFSETGAGK(+144.10).H	N	82.17	2295.09	-11.4	766.027	3	117.96	67067	8	41	60	iTRAQ 4plex (K N-term)
sp|Q9BQE3|TBA1C_HUMAN	R.A(+144.10)VFVDLEPTVIDEVR.T	N	74.63	1845	-16.2	923.491	2	147.14	81608	10	65	79	iTRAQ 4plex (K N-term)
sp|Q9BQE3|TBA1C_HUMAN	R.Q(+144.10)LFHPEQLITGK(+144.10).E	N	68.5	1697.97	6.9	567	3	104.25	60276	1	85	96	iTRAQ 4plex (K N-term)
sp|Q9BQE3|TBA1C_HUMAN	K.V(+144.10)GINYQPPTVVPGGDLAK(+144.10).V	N	64.67	2112.18	-5.1	705.063	3	116.06	66121	8	353	370	iTRAQ 4plex (K N-term)
sp|Q9BQE3|TBA1C_HUMAN	R.LISQIVSSITASLR.F	Y	62.81	1486.87	-9.2	744.436	2	160.65	88293	16	230	243
sp|Q9BQE3|TBA1C_HUMAN	K.D(+144.10)VNAAIATIK(+144.10).T	N	62.62	1302.77	-3.3	652.391	2	81.15	48860	15	327	336	iTRAQ 4plex (K N-term)
sp|Q9BQE3|TBA1C_HUMAN	R.N(+144.10)LDIERPTYTNLNR.L	N	57.23	1861.97	-4.2	621.663	3	78.25	47428	6	216	229	iTRAQ 4plex (K N-term)
sp|Q9BQE3|TBA1C_HUMAN	R.L(+144.10)ISQIVSSITASLR.F	Y	48.74	1630.97	-10	816.485	2	182.48	99063	11	230	243	iTRAQ 4plex (K N-term)
sp|Q9BQE3|TBA1C_HUMAN	K.E(+144.10)IIDLVLDR.I	N	39.56	1228.71	-0.8	615.363	2	133.95	75046	4	113	121	iTRAQ 4plex (K N-term)
sp|Q9BQE3|TBA1C_HUMAN	K.F(+144.10)DLMYAK(+144.10).R	N	38.16	1174.63	3.5	588.322	2	91.8	54128	4	395	401	iTRAQ 4plex (K N-term)
sp|Q9BQE3|TBA1C_HUMAN	R.A(+144.10)FVHWYVGEGMEEGEFSEAR.E	N	34.39	2473.11	-14.7	619.276	4	123.27	69713	1	403	422	iTRAQ 4plex (K N-term)
sp|Q9BQE3|TBA1C_HUMAN	R.L(+144.10)SVDYGK(+144.10).K	N	33.79	1068.6	5.5	535.311	2	55.29	36067	8	157	163	iTRAQ 4plex (K N-term)
sp|Q9BQE3|TBA1C_HUMAN	K.E(+144.10)DAANNYAR.G	N	31.53	1166.54	-3.8	584.276	2	15.45	16401	3	97	105	iTRAQ 4plex (K N-term)
sp|Q9BQE3|TBA1C_HUMAN	R.L(+144.10)SVDYGK(+144.10)K(+144.10).S	N	27.64	1340.8	12.3	447.945	3	51.97	34426	2	157	164	iTRAQ 4plex (K N-term)
sp|Q9BQE3|TBA1C_HUMAN	R.G(+144.10)DVVPK(+144.10).D	N	24.06	901.543	10.9	451.784	2	27.15	22196	7	321	326	iTRAQ 4plex (K N-term)
sp|P68363|TBA1B_HUMAN	R.F(+144.10)DGALNVDLTEFQTNLVPYPR.I	N	88.34	2552.3	-16.9	851.76	3	167.23	91528	9	244	264	iTRAQ 4plex (K N-term)
sp|P68363|TBA1B_HUMAN	K.T(+144.10)IGGGDDSFNTFFSETGAGK(+144.10).H	N	82.17	2295.09	-11.4	766.027	3	117.96	67067	8	41	60	iTRAQ 4plex (K N-term)
sp|P68363|TBA1B_HUMAN	R.A(+144.10)VFVDLEPTVIDEVR.T	N	74.63	1845	-16.2	923.491	2	147.14	81608	10	65	79	iTRAQ 4plex (K N-term)
sp|P68363|TBA1B_HUMAN	R.Q(+144.10)LFHPEQLITGK(+144.10).E	N	68.5	1697.97	6.9	567	3	104.25	60276	1	85	96	iTRAQ 4plex (K N-term)
sp|P68363|TBA1B_HUMAN	K.V(+144.10)GINYQPPTVVPGGDLAK(+144.10).V	N	64.67	2112.18	-5.1	705.063	3	116.06	66121	8	353	370	iTRAQ 4plex (K N-term)
sp|P68363|TBA1B_HUMAN	R.LISQIVSSITASLR.F	Y	62.81	1486.87	-9.2	744.436	2	160.65	88293	16	230	243
sp|P68363|TBA1B_HUMAN	K.D(+144.10)VNAAIATIK(+144.10).T	N	62.62	1302.77	-3.3	652.391	2	81.15	48860	15	327	336	iTRAQ 4plex (K N-term)
sp|P68363|TBA1B_HUMAN	R.N(+144.10)LDIERPTYTNLNR.L	N	57.23	1861.97	-4.2	621.663	3	78.25	47428	6	216	229	iTRAQ 4plex (K N-term)
sp|P68363|TBA1B_HUMAN	R.L(+144.10)ISQIVSSITASLR.F	Y	48.74	1630.97	-10	816.485	2	182.48	99063	11	230	243	iTRAQ 4plex (K N-term)
sp|P68363|TBA1B_HUMAN	K.E(+144.10)IIDLVLDR.I	N	39.56	1228.71	-0.8	615.363	2	133.95	75046	4	113	121	iTRAQ 4plex (K N-term)
sp|P68363|TBA1B_HUMAN	K.F(+144.10)DLMYAK(+144.10).R	N	38.16	1174.63	3.5	588.322	2	91.8	54128	4	395	401	iTRAQ 4plex (K N-term)
sp|P68363|TBA1B_HUMAN	R.A(+144.10)FVHWYVGEGMEEGEFSEAR.E	N	34.39	2473.11	-14.7	619.276	4	123.27	69713	1	403	422	iTRAQ 4plex (K N-term)
sp|P68363|TBA1B_HUMAN	R.L(+144.10)SVDYGK(+144.10).K	N	33.79	1068.6	5.5	535.311	2	55.29	36067	8	157	163	iTRAQ 4plex (K N-term)
sp|P68363|TBA1B_HUMAN	K.E(+144.10)DAANNYAR.G	N	31.53	1166.54	-3.8	584.276	2	15.45	16401	3	97	105	iTRAQ 4plex (K N-term)
sp|P68363|TBA1B_HUMAN	R.L(+144.10)SVDYGK(+144.10)K(+144.10).S	N	27.64	1340.8	12.3	447.945	3	51.97	34426	2	157	164	iTRAQ 4plex (K N-term)
sp|P68363|TBA1B_HUMAN	R.G(+144.10)DVVPK(+144.10).D	N	24.06	901.543	10.9	451.784	2	27.15	22196	7	321	326	iTRAQ 4plex (K N-term)
tr|F5H5D3|F5H5D3_HUMAN	R.F(+144.10)DGALNVDLTEFQTNLVPYPR.I	N	88.34	2552.3	-16.9	851.76	3	167.23	91528	9	314	334	iTRAQ 4plex (K N-term)
tr|F5H5D3|F5H5D3_HUMAN	K.T(+144.10)IGGGDDSFNTFFSETGAGK(+144.10).H	N	82.17	2295.09	-11.4	766.027	3	117.96	67067	8	111	130	iTRAQ 4plex (K N-term)
tr|F5H5D3|F5H5D3_HUMAN	R.A(+144.10)VFVDLEPTVIDEVR.T	N	74.63	1845	-16.2	923.491	2	147.14	81608	10	135	149	iTRAQ 4plex (K N-term)
tr|F5H5D3|F5H5D3_HUMAN	R.Q(+144.10)LFHPEQLITGK(+144.10).E	N	68.5	1697.97	6.9	567	3	104.25	60276	1	155	166	iTRAQ 4plex (K N-term)
tr|F5H5D3|F5H5D3_HUMAN	K.V(+144.10)GINYQPPTVVPGGDLAK(+144.10).V	N	64.67	2112.18	-5.1	705.063	3	116.06	66121	8	423	440	iTRAQ 4plex (K N-term)
tr|F5H5D3|F5H5D3_HUMAN	R.LISQIVSSITASLR.F	Y	62.81	1486.87	-9.2	744.436	2	160.65	88293	16	300	313
tr|F5H5D3|F5H5D3_HUMAN	K.D(+144.10)VNAAIATIK(+144.10).T	N	62.62	1302.77	-3.3	652.391	2	81.15	48860	15	397	406	iTRAQ 4plex (K N-term)
tr|F5H5D3|F5H5D3_HUMAN	R.N(+144.10)LDIERPTYTNLNR.L	N	57.23	1861.97	-4.2	621.663	3	78.25	47428	6	286	299	iTRAQ 4plex (K N-term)
tr|F5H5D3|F5H5D3_HUMAN	R.L(+144.10)ISQIVSSITASLR.F	Y	48.74	1630.97	-10	816.485	2	182.48	99063	11	300	313	iTRAQ 4plex (K N-term)
tr|F5H5D3|F5H5D3_HUMAN	K.E(+144.10)IIDLVLDR.I	N	39.56	1228.71	-0.8	615.363	2	133.95	75046	4	183	191	iTRAQ 4plex (K N-term)
tr|F5H5D3|F5H5D3_HUMAN	K.F(+144.10)DLMYAK(+144.10).R	N	38.16	1174.63	3.5	588.322	2	91.8	54128	4	465	471	iTRAQ 4plex (K N-term)
tr|F5H5D3|F5H5D3_HUMAN	R.A(+144.10)FVHWYVGEGMEEGEFSEAR.E	N	34.39	2473.11	-14.7	619.276	4	123.27	69713	1	473	492	iTRAQ 4plex (K N-term)
tr|F5H5D3|F5H5D3_HUMAN	R.L(+144.10)SVDYGK(+144.10).K	N	33.79	1068.6	5.5	535.311	2	55.29	36067	8	227	233	iTRAQ 4plex (K N-term)
tr|F5H5D3|F5H5D3_HUMAN	K.E(+144.10)DAANNYAR.G	N	31.53	1166.54	-3.8	584.276	2	15.45	16401	3	167	175	iTRAQ 4plex (K N-term)
tr|F5H5D3|F5H5D3_HUMAN	R.L(+144.10)SVDYGK(+144.10)K(+144.10).S	N	27.64	1340.8	12.3	447.945	3	51.97	34426	2	227	234	iTRAQ 4plex (K N-term)
tr|F5H5D3|F5H5D3_HUMAN	R.G(+144.10)DVVPK(+144.10).D	N	24.06	901.543	10.9	451.784	2	27.15	22196	7	391	396	iTRAQ 4plex (K N-term)
sp|P68366|TBA4A_HUMAN	R.F(+144.10)DGALNVDLTEFQTNLVPYPR.I	N	88.34	2552.3	-16.9	851.76	3	167.23	91528	9	244	264	iTRAQ 4plex (K N-term)
sp|P68366|TBA4A_HUMAN	R.Q(+144.10)LFHPEQLITGK(+144.10).E	N	68.5	1697.97	6.9	567	3	104.25	60276	1	85	96	iTRAQ 4plex (K N-term)
sp|P68366|TBA4A_HUMAN	K.V(+144.10)GINYQPPTVVPGGDLAK(+144.10).V	N	64.67	2112.18	-5.1	705.063	3	116.06	66121	8	353	370	iTRAQ 4plex (K N-term)
sp|P68366|TBA4A_HUMAN	R.LISQIVSSITASLR.F	Y	62.81	1486.87	-9.2	744.436	2	160.65	88293	16	230	243
sp|P68366|TBA4A_HUMAN	R.N(+144.10)LDIERPTYTNLNR.L	N	57.23	1861.97	-4.2	621.663	3	78.25	47428	6	216	229	iTRAQ 4plex (K N-term)
sp|P68366|TBA4A_HUMAN	R.L(+144.10)ISQIVSSITASLR.F	Y	48.74	1630.97	-10	816.485	2	182.48	99063	11	230	243	iTRAQ 4plex (K N-term)
sp|P68366|TBA4A_HUMAN	K.F(+144.10)DLMYAK(+144.10).R	N	38.16	1174.63	3.5	588.322	2	91.8	54128	4	395	401	iTRAQ 4plex (K N-term)
sp|P68366|TBA4A_HUMAN	R.A(+144.10)FVHWYVGEGMEEGEFSEAR.E	N	34.39	2473.11	-14.7	619.276	4	123.27	69713	1	403	422	iTRAQ 4plex (K N-term)
sp|P68366|TBA4A_HUMAN	R.L(+144.10)SVDYGK(+144.10).K	N	33.79	1068.6	5.5	535.311	2	55.29	36067	8	157	163	iTRAQ 4plex (K N-term)
sp|P68366|TBA4A_HUMAN	K.E(+144.10)DAANNYAR.G	N	31.53	1166.54	-3.8	584.276	2	15.45	16401	3	97	105	iTRAQ 4plex (K N-term)
sp|P68366|TBA4A_HUMAN	R.L(+144.10)SVDYGK(+144.10)K(+144.10).S	N	27.64	1340.8	12.3	447.945	3	51.97	34426	2	157	164	iTRAQ 4plex (K N-term)
sp|P68366|TBA4A_HUMAN	R.G(+144.10)DVVPK(+144.10).D	N	24.06	901.543	10.9	451.784	2	27.15	22196	7	321	326	iTRAQ 4plex (K N-term)
tr|F8VVB9|F8VVB9_HUMAN	R.F(+144.10)DGALNVDLTEFQTNLVPYPR.I	N	88.34	2552.3	-16.9	851.76	3	167.23	91528	9	204	224	iTRAQ 4plex (K N-term)
tr|F8VVB9|F8VVB9_HUMAN	K.T(+144.10)IGGGDDSFNTFFSETGAGK(+144.10).H	N	82.17	2295.09	-11.4	766.027	3	117.96	67067	8	41	60	iTRAQ 4plex (K N-term)
tr|F8VVB9|F8VVB9_HUMAN	R.A(+144.10)VFVDLEPTVIDEVR.T	N	74.63	1845	-16.2	923.491	2	147.14	81608	10	65	79	iTRAQ 4plex (K N-term)
tr|F8VVB9|F8VVB9_HUMAN	R.Q(+144.10)LFHPEQLITGK(+144.10).E	N	68.5	1697.97	6.9	567	3	104.25	60276	1	85	96	iTRAQ 4plex (K N-term)
tr|F8VVB9|F8VVB9_HUMAN	R.LISQIVSSITASLR.F	Y	62.81	1486.87	-9.2	744.436	2	160.65	88293	16	190	203
tr|F8VVB9|F8VVB9_HUMAN	R.N(+144.10)LDIERPTYTNLNR.L	N	57.23	1861.97	-4.2	621.663	3	78.25	47428	6	176	189	iTRAQ 4plex (K N-term)
tr|F8VVB9|F8VVB9_HUMAN	R.L(+144.10)ISQIVSSITASLR.F	Y	48.74	1630.97	-10	816.485	2	182.48	99063	11	190	203	iTRAQ 4plex (K N-term)
tr|F8VVB9|F8VVB9_HUMAN	K.E(+144.10)IIDLVLDR.I	N	39.56	1228.71	-0.8	615.363	2	133.95	75046	4	113	121	iTRAQ 4plex (K N-term)
tr|F8VVB9|F8VVB9_HUMAN	K.E(+144.10)DAANNYAR.G	N	31.53	1166.54	-3.8	584.276	2	15.45	16401	3	97	105	iTRAQ 4plex (K N-term)
sp|Q9NY65|TBA8_HUMAN	R.F(+144.10)DGALNVDLTEFQTNLVPYPR.I	N	88.34	2552.3	-16.9	851.76	3	167.23	91528	9	244	264	iTRAQ 4plex (K N-term)
sp|Q9NY65|TBA8_HUMAN	R.Q(+144.10)LFHPEQLITGK(+144.10).E	N	68.5	1697.97	6.9	567	3	104.25	60276	1	85	96	iTRAQ 4plex (K N-term)
sp|Q9NY65|TBA8_HUMAN	K.V(+144.10)GINYQPPTVVPGGDLAK(+144.10).V	N	64.67	2112.18	-5.1	705.063	3	116.06	66121	8	353	370	iTRAQ 4plex (K N-term)
sp|Q9NY65|TBA8_HUMAN	R.LISQIVSSITASLR.F	Y	62.81	1486.87	-9.2	744.436	2	160.65	88293	16	230	243
sp|Q9NY65|TBA8_HUMAN	R.N(+144.10)LDIERPTYTNLNR.L	N	57.23	1861.97	-4.2	621.663	3	78.25	47428	6	216	229	iTRAQ 4plex (K N-term)
sp|Q9NY65|TBA8_HUMAN	R.L(+144.10)ISQIVSSITASLR.F	Y	48.74	1630.97	-10	816.485	2	182.48	99063	11	230	243	iTRAQ 4plex (K N-term)
sp|Q9NY65|TBA8_HUMAN	K.F(+144.10)DLMYAK(+144.10).R	N	38.16	1174.63	3.5	588.322	2	91.8	54128	4	395	401	iTRAQ 4plex (K N-term)
sp|Q9NY65|TBA8_HUMAN	R.A(+144.10)FVHWYVGEGMEEGEFSEAR.E	N	34.39	2473.11	-14.7	619.276	4	123.27	69713	1	403	422	iTRAQ 4plex (K N-term)
sp|Q9NY65|TBA8_HUMAN	K.E(+144.10)DAANNYAR.G	N	31.53	1166.54	-3.8	584.276	2	15.45	16401	3	97	105	iTRAQ 4plex (K N-term)
sp|Q9NY65|TBA8_HUMAN	R.G(+144.10)DVVPK(+144.10).D	N	24.06	901.543	10.9	451.784	2	27.15	22196	7	321	326	iTRAQ 4plex (K N-term)
tr|C9J2C0|C9J2C0_HUMAN	R.F(+144.10)DGALNVDLTEFQTNLVPYPR.I	N	88.34	2552.3	-16.9	851.76	3	167.23	91528	9	268	288	iTRAQ 4plex (K N-term)
tr|C9J2C0|C9J2C0_HUMAN	R.Q(+144.10)LFHPEQLITGK(+144.10).E	N	68.5	1697.97	6.9	567	3	104.25	60276	1	109	120	iTRAQ 4plex (K N-term)
tr|C9J2C0|C9J2C0_HUMAN	K.V(+144.10)GINYQPPTVVPGGDLAK(+144.10).V	N	64.67	2112.18	-5.1	705.063	3	116.06	66121	8	377	394	iTRAQ 4plex (K N-term)
tr|C9J2C0|C9J2C0_HUMAN	R.LISQIVSSITASLR.F	Y	62.81	1486.87	-9.2	744.436	2	160.65	88293	16	254	267
tr|C9J2C0|C9J2C0_HUMAN	R.N(+144.10)LDIERPTYTNLNR.L	N	57.23	1861.97	-4.2	621.663	3	78.25	47428	6	240	253	iTRAQ 4plex (K N-term)
tr|C9J2C0|C9J2C0_HUMAN	R.L(+144.10)ISQIVSSITASLR.F	Y	48.74	1630.97	-10	816.485	2	182.48	99063	11	254	267	iTRAQ 4plex (K N-term)
tr|C9J2C0|C9J2C0_HUMAN	K.F(+144.10)DLMYAK(+144.10).R	N	38.16	1174.63	3.5	588.322	2	91.8	54128	4	419	425	iTRAQ 4plex (K N-term)
tr|C9J2C0|C9J2C0_HUMAN	R.A(+144.10)FVHWYVGEGMEEGEFSEAR.E	N	34.39	2473.11	-14.7	619.276	4	123.27	69713	1	427	446	iTRAQ 4plex (K N-term)
tr|C9J2C0|C9J2C0_HUMAN	K.E(+144.10)DAANNYAR.G	N	31.53	1166.54	-3.8	584.276	2	15.45	16401	3	121	129	iTRAQ 4plex (K N-term)
tr|C9J2C0|C9J2C0_HUMAN	R.G(+144.10)DVVPK(+144.10).D	N	24.06	901.543	10.9	451.784	2	27.15	22196	7	345	350	iTRAQ 4plex (K N-term)
tr|C9JDS9|C9JDS9_HUMAN	R.F(+144.10)DGALNVDLTEFQTNLVPYPR.I	N	88.34	2552.3	-16.9	851.76	3	167.23	91528	9	91	111	iTRAQ 4plex (K N-term)
tr|C9JDS9|C9JDS9_HUMAN	R.LISQIVSSITASLR.F	Y	62.81	1486.87	-9.2	744.436	2	160.65	88293	16	77	90
tr|C9JDS9|C9JDS9_HUMAN	R.N(+144.10)LDIERPTYTNLNR.L	N	57.23	1861.97	-4.2	621.663	3	78.25	47428	6	63	76	iTRAQ 4plex (K N-term)
tr|C9JDS9|C9JDS9_HUMAN	R.L(+144.10)ISQIVSSITASLR.F	Y	48.74	1630.97	-10	816.485	2	182.48	99063	11	77	90	iTRAQ 4plex (K N-term)
tr|C9JDS9|C9JDS9_HUMAN	R.L(+144.10)SVDYGK(+144.10).K	N	33.79	1068.6	5.5	535.311	2	55.29	36067	8	4	10	iTRAQ 4plex (K N-term)
tr|C9JDS9|C9JDS9_HUMAN	R.L(+144.10)SVDYGK(+144.10)K(+144.10).S	N	27.64	1340.8	12.3	447.945	3	51.97	34426	2	4	11	iTRAQ 4plex (K N-term)
sp|Q9H853|TBA4B_HUMAN	R.Q(+144.10)IFHPEQLITGK(+144.10).E	N	68.5	1697.97	6.9	567	3	104.25	60276	1	24	35	iTRAQ 4plex (K N-term)
sp|Q9H853|TBA4B_HUMAN	R.LISQIVSSITASLR.F	Y	62.81	1486.87	-9.2	744.436	2	160.65	88293	16	169	182
sp|Q9H853|TBA4B_HUMAN	C.N(+144.10)LDIERPTYTNLNR.L	N	57.23	1861.97	-4.2	621.663	3	78.25	47428	6	155	168	iTRAQ 4plex (K N-term)
sp|Q9H853|TBA4B_HUMAN	R.L(+144.10)ISQIVSSITASLR.F	Y	48.74	1630.97	-10	816.485	2	182.48	99063	11	169	182	iTRAQ 4plex (K N-term)
sp|P13639|EF2_HUMAN	R.A(+144.10)LLELQLEPEELYQTFQR.I	Y	80.84	2363.25	-11.9	788.747	3	170.83	93306	12	163	180	iTRAQ 4plex (K N-term)
sp|P13639|EF2_HUMAN	R.W(+144.10)LPAGDALLQMITIHLPSPVTAQK(+144.10).Y	Y	71.66	2887.62	-5.1	722.909	4	188.29	101980	6	343	366	iTRAQ 4plex (K N-term)
sp|P13639|EF2_HUMAN	K.T(+144.10)GTITTFEHAHNMR.V	Y	63.17	1758.86	-5.7	587.29	3	58.32	37552	7	482	495	iTRAQ 4plex (K N-term)
sp|P13639|EF2_HUMAN	R.Y(+144.10)VEPIEDVPC(+57.02)GNIVGLVGVDQFLVK(+144.10).T	Y	62.21	3046.62	-25.2	1016.52	3	175.56	95642	2	457	481	iTRAQ 4plex (Y); Carbamidomethylation; iTRAQ 4plex (K N-term)
sp|P13639|EF2_HUMAN	K.G(+144.10)VQYLNEIK(+144.10)DSVVAGFQWATK(+144.10).E	Y	60.64	2784.51	-5.6	697.131	4	172.84	94298	5	668	688	iTRAQ 4plex (K N-term)
sp|P13639|EF2_HUMAN	K.E(+144.10)GIPALDNFLDK(+144.10)L	Y	59.22	1731.96	6.5	578.331	3	170.23	93007	13	846	858	iTRAQ 4plex (K N-term)
sp|P13639|EF2_HUMAN	K.S(+144.10)TAISLFYELSENDLNFIK(+144.10).Q	Y	56.49	2491.3	-1.2	831.441	3	179.45	97568	2	72	90	iTRAQ 4plex (K N-term)
sp|P13639|EF2_HUMAN	K.G(+144.10)PLMMYISK(+144.10).M	Y	55.15	1326.72	-3.1	664.367	2	109.64	62941	7	392	400	iTRAQ 4plex (K N-term)
sp|P13639|EF2_HUMAN	K.G(+144.10)VQYLNEIK(+144.10).D	Y	51.34	1350.77	-10.5	676.386	2	81.85	49201	1	668	676	iTRAQ 4plex (K N-term)
sp|P13639|EF2_HUMAN	K.F(+144.10)SVSPVVR.V	Y	50.36	1033.6	8.8	517.813	2	75.09	45855	11	499	506	iTRAQ 4plex (K N-term)
sp|P13639|EF2_HUMAN	K.Y(+144.10)EWDVAEAR.K	Y	49.33	1281.61	-21.4	641.798	2	71.49	44082	2	639	647	iTRAQ 4plex (Y)
sp|P13639|EF2_HUMAN	K.S(+144.10)DPVVSYR.E	Y	48.95	1065.56	1.8	533.786	2	38.11	27610	1	573	580	iTRAQ 4plex (K N-term)
sp|P13639|EF2_HUMAN	K.E(+144.10)DLYLK(+144.10)PIQR.T	Y	46.08	1561.9	-4.8	521.639	3	78.29	47446	1	440	449	iTRAQ 4plex (K N-term)
sp|P13639|EF2_HUMAN	M.V(+144.10)NFTVDQIR.A	Y	40.05	1234.68	0.6	618.346	2	86.03	51279	8	2	10	iTRAQ 4plex (K N-term)
sp|P13639|EF2_HUMAN	R.I(+144.10)MGPNYTPGK(+144.10).K	Y	37.43	1364.73	-10.1	683.367	2	64.25	40491	2	429	438	iTRAQ 4plex (K N-term)
sp|P13639|EF2_HUMAN	K.A(+144.10)GIIASAR.A	Y	36.64	901.545	10.7	451.784	2	37.85	27484	7	43	50	iTRAQ 4plex (K N-term)
sp|P13639|EF2_HUMAN	R.L(+144.10)MEPIYLVEIQC(+57.02)PEQVVGGIYGVLNR.K	Y	34.59	3132.65	-26.3	1045.19	3	185.08	100352	1	740	765	iTRAQ 4plex (K N-term); Carbamidomethylation
sp|P13639|EF2_HUMAN	R.G(+144.10)GGQIIPTAR.R	Y	33.37	1112.64	-0.7	557.327	2	47.04	31998	20	717	726	iTRAQ 4plex (K N-term)
sp|P13639|EF2_HUMAN	R.T(+144.10)ILMMGR.Y	Y	32.14	964.53	10	483.277	2	74.44	45533	17	450	456	iTRAQ 4plex (K N-term)
sp|P13639|EF2_HUMAN	K.N(+144.10)PADLPK(+144.10).L	Y	31.44	1041.6	0.7	521.809	2	41.57	29302	4	513	519	iTRAQ 4plex (K N-term)
sp|P13639|EF2_HUMAN	K.M(+144.10)VPTSDK(+144.10).G	Y	22.81	1064.57	5.5	533.297	2	33.93	25541	5	401	407	iTRAQ 4plex (K N-term)
tr|K7EJ74|K7EJ74_HUMAN	R.G(+144.10)GGQIIPTAR.R	Y	33.37	1112.64	-0.7	557.327	2	47.04	31998	20	87	96	iTRAQ 4plex (K N-term)
tr|K7EP67|K7EP67_HUMAN	R.G(+144.10)GGQIIPTAR.R	Y	33.37	1112.64	-0.7	557.327	2	47.04	31998	20	138	147	iTRAQ 4plex (K N-term)
sp|Q15029|U5S1_HUMAN	R.G(+144.10)GGQIIPTAR.R	Y	33.37	1112.64	-0.7	557.327	2	47.04	31998	20	804	813	iTRAQ 4plex (K N-term)
sp|Q71U36|TBA1A_HUMAN	R.F(+144.10)DGALNVDLTEFQTNLVPYPR.I	N	88.34	2552.3	-16.9	851.76	3	167.23	91528	9	244	264	iTRAQ 4plex (K N-term)
sp|Q71U36|TBA1A_HUMAN	K.T(+144.10)IGGGDDSFNTFFSETGAGK(+144.10).H	N	82.17	2295.09	-11.4	766.027	3	117.96	67067	8	41	60	iTRAQ 4plex (K N-term)
sp|Q71U36|TBA1A_HUMAN	R.A(+144.10)VFVDLEPTVIDEVR.T	N	74.63	1845	-16.2	923.491	2	147.14	81608	10	65	79	iTRAQ 4plex (K N-term)
sp|Q71U36|TBA1A_HUMAN	R.Q(+144.10)LFHPEQLITGK(+144.10).E	N	68.5	1697.97	6.9	567	3	104.25	60276	1	85	96	iTRAQ 4plex (K N-term)
sp|Q71U36|TBA1A_HUMAN	K.V(+144.10)GINYQPPTVVPGGDLAK(+144.10).V	N	64.67	2112.18	-5.1	705.063	3	116.06	66121	8	353	370	iTRAQ 4plex (K N-term)
sp|Q71U36|TBA1A_HUMAN	K.D(+144.10)VNAAIATIK(+144.10).T	N	62.62	1302.77	-3.3	652.391	2	81.15	48860	15	327	336	iTRAQ 4plex (K N-term)
sp|Q71U36|TBA1A_HUMAN	R.N(+144.10)LDIERPTYTNLNR.L	N	57.23	1861.97	-4.2	621.663	3	78.25	47428	6	216	229	iTRAQ 4plex (K N-term)
sp|Q71U36|TBA1A_HUMAN	K.E(+144.10)IIDLVLDR.I	N	39.56	1228.71	-0.8	615.363	2	133.95	75046	4	113	121	iTRAQ 4plex (K N-term)
sp|Q71U36|TBA1A_HUMAN	K.F(+144.10)DLMYAK(+144.10).R	N	38.16	1174.63	3.5	588.322	2	91.8	54128	4	395	401	iTRAQ 4plex (K N-term)
sp|Q71U36|TBA1A_HUMAN	R.L(+144.10)IGQIVSSITASLR.F	Y	37.77	1600.96	-15	801.476	2	179.67	97674	2	230	243	iTRAQ 4plex (K N-term)
sp|Q71U36|TBA1A_HUMAN	R.A(+144.10)FVHWYVGEGMEEGEFSEAR.E	N	34.39	2473.11	-14.7	619.276	4	123.27	69713	1	403	422	iTRAQ 4plex (K N-term)
sp|Q71U36|TBA1A_HUMAN	R.L(+144.10)SVDYGK(+144.10).K	N	33.79	1068.6	5.5	535.311	2	55.29	36067	8	157	163	iTRAQ 4plex (K N-term)
sp|Q71U36|TBA1A_HUMAN	K.E(+144.10)DAANNYAR.G	N	31.53	1166.54	-3.8	584.276	2	15.45	16401	3	97	105	iTRAQ 4plex (K N-term)
sp|Q71U36|TBA1A_HUMAN	R.L(+144.10)SVDYGK(+144.10)K(+144.10).S	N	27.64	1340.8	12.3	447.945	3	51.97	34426	2	157	164	iTRAQ 4plex (K N-term)
sp|Q71U36|TBA1A_HUMAN	R.G(+144.10)DVVPK(+144.10).D	N	24.06	901.543	10.9	451.784	2	27.15	22196	7	321	326	iTRAQ 4plex (K N-term)
sp|Q13748|TBA3C_HUMAN	R.F(+144.10)DGALNVDLTEFQTNLVPYPR.I	N	88.34	2552.3	-16.9	851.76	3	167.23	91528	9	244	264	iTRAQ 4plex (K N-term)
sp|Q13748|TBA3C_HUMAN	K.T(+144.10)IGGGDDSFNTFFSETGAGK(+144.10).H	N	82.17	2295.09	-11.4	766.027	3	117.96	67067	8	41	60	iTRAQ 4plex (K N-term)
sp|Q13748|TBA3C_HUMAN	R.Q(+144.10)LFHPEQLITGK(+144.10).E	N	68.5	1697.97	6.9	567	3	104.25	60276	1	85	96	iTRAQ 4plex (K N-term)
sp|Q13748|TBA3C_HUMAN	K.V(+144.10)GINYQPPTVVPGGDLAK(+144.10).V	N	64.67	2112.18	-5.1	705.063	3	116.06	66121	8	353	370	iTRAQ 4plex (K N-term)
sp|Q13748|TBA3C_HUMAN	K.D(+144.10)VNAAIATIK(+144.10).T	N	62.62	1302.77	-3.3	652.391	2	81.15	48860	15	327	336	iTRAQ 4plex (K N-term)
sp|Q13748|TBA3C_HUMAN	R.N(+144.10)LDIERPTYTNLNR.L	N	57.23	1861.97	-4.2	621.663	3	78.25	47428	6	216	229	iTRAQ 4plex (K N-term)
sp|Q13748|TBA3C_HUMAN	K.F(+144.10)DLMYAK(+144.10).R	N	38.16	1174.63	3.5	588.322	2	91.8	54128	4	395	401	iTRAQ 4plex (K N-term)
sp|Q13748|TBA3C_HUMAN	R.L(+144.10)IGQIVSSITASLR.F	Y	37.77	1600.96	-15	801.476	2	179.67	97674	2	230	243	iTRAQ 4plex (K N-term)
sp|Q13748|TBA3C_HUMAN	R.A(+144.10)FVHWYVGEGMEEGEFSEAR.E	N	34.39	2473.11	-14.7	619.276	4	123.27	69713	1	403	422	iTRAQ 4plex (K N-term)
sp|Q13748|TBA3C_HUMAN	R.L(+144.10)SVDYGK(+144.10).K	N	33.79	1068.6	5.5	535.311	2	55.29	36067	8	157	163	iTRAQ 4plex (K N-term)
sp|Q13748|TBA3C_HUMAN	K.E(+144.10)DAANNYAR.G	N	31.53	1166.54	-3.8	584.276	2	15.45	16401	3	97	105	iTRAQ 4plex (K N-term)
sp|Q13748|TBA3C_HUMAN	R.L(+144.10)SVDYGK(+144.10)K(+144.10).S	N	27.64	1340.8	12.3	447.945	3	51.97	34426	2	157	164	iTRAQ 4plex (K N-term)
sp|Q13748|TBA3C_HUMAN	R.G(+144.10)DVVPK(+144.10).D	N	24.06	901.543	10.9	451.784	2	27.15	22196	7	321	326	iTRAQ 4plex (K N-term)
sp|Q6PEY2|TBA3E_HUMAN	R.F(+144.10)DGALNVDLTEFQTNLVPYPR.I	N	88.34	2552.3	-16.9	851.76	3	167.23	91528	9	244	264	iTRAQ 4plex (K N-term)
sp|Q6PEY2|TBA3E_HUMAN	K.T(+144.10)IGGGDDSFNTFFSETGAGK(+144.10).H	N	82.17	2295.09	-11.4	766.027	3	117.96	67067	8	41	60	iTRAQ 4plex (K N-term)
sp|Q6PEY2|TBA3E_HUMAN	R.Q(+144.10)LFHPEQLITGK(+144.10).E	N	68.5	1697.97	6.9	567	3	104.25	60276	1	85	96	iTRAQ 4plex (K N-term)
sp|Q6PEY2|TBA3E_HUMAN	K.V(+144.10)GINYQPPTVVPGGDLAK(+144.10).V	N	64.67	2112.18	-5.1	705.063	3	116.06	66121	8	353	370	iTRAQ 4plex (K N-term)
sp|Q6PEY2|TBA3E_HUMAN	K.D(+144.10)VNAAIATIK(+144.10).T	N	62.62	1302.77	-3.3	652.391	2	81.15	48860	15	327	336	iTRAQ 4plex (K N-term)
sp|Q6PEY2|TBA3E_HUMAN	R.N(+144.10)LDIERPTYTNLNR.L	N	57.23	1861.97	-4.2	621.663	3	78.25	47428	6	216	229	iTRAQ 4plex (K N-term)
sp|Q6PEY2|TBA3E_HUMAN	K.F(+144.10)DLMYAK(+144.10).W	N	38.16	1174.63	3.5	588.322	2	91.8	54128	4	395	401	iTRAQ 4plex (K N-term)
sp|Q6PEY2|TBA3E_HUMAN	R.L(+144.10)IGQIVSSITASLR.F	Y	37.77	1600.96	-15	801.476	2	179.67	97674	2	230	243	iTRAQ 4plex (K N-term)
sp|Q6PEY2|TBA3E_HUMAN	W.A(+144.10)FVHWYVGEGMEEGEFSEAR.E	N	34.39	2473.11	-14.7	619.276	4	123.27	69713	1	403	422	iTRAQ 4plex (K N-term)
sp|Q6PEY2|TBA3E_HUMAN	R.G(+144.10)DVVPK(+144.10).D	N	24.06	901.543	10.9	451.784	2	27.15	22196	7	321	326	iTRAQ 4plex (K N-term)
tr|F8VQQ4|F8VQQ4_HUMAN	K.T(+144.10)IGGGDDSFNTFFSETGAGK(+144.10).H	N	82.17	2295.09	-11.4	766.027	3	117.96	67067	8	6	25	iTRAQ 4plex (K N-term)
tr|F8VQQ4|F8VQQ4_HUMAN	R.A(+144.10)VFVDLEPTVIDEVR.T	N	74.63	1845	-16.2	923.491	2	147.14	81608	10	30	44	iTRAQ 4plex (K N-term)
tr|F8VQQ4|F8VQQ4_HUMAN	R.Q(+144.10)LFHPEQLITGK(+144.10).E	N	68.5	1697.97	6.9	567	3	104.25	60276	1	50	61	iTRAQ 4plex (K N-term)
tr|F8VQQ4|F8VQQ4_HUMAN	R.N(+144.10)LDIERPTYTNLNR.L	N	57.23	1861.97	-4.2	621.663	3	78.25	47428	6	181	194	iTRAQ 4plex (K N-term)
tr|F8VQQ4|F8VQQ4_HUMAN	K.E(+144.10)IIDLVLDR.I	N	39.56	1228.71	-0.8	615.363	2	133.95	75046	4	78	86	iTRAQ 4plex (K N-term)
tr|F8VQQ4|F8VQQ4_HUMAN	R.L(+144.10)IGQIVSSITASLR.F	Y	37.77	1600.96	-15	801.476	2	179.67	97674	2	195	208	iTRAQ 4plex (K N-term)
tr|F8VQQ4|F8VQQ4_HUMAN	R.L(+144.10)SVDYGK(+144.10).K	N	33.79	1068.6	5.5	535.311	2	55.29	36067	8	122	128	iTRAQ 4plex (K N-term)
tr|F8VQQ4|F8VQQ4_HUMAN	K.E(+144.10)DAANNYAR.G	N	31.53	1166.54	-3.8	584.276	2	15.45	16401	3	62	70	iTRAQ 4plex (K N-term)
tr|F8VQQ4|F8VQQ4_HUMAN	R.L(+144.10)SVDYGK(+144.10)K(+144.10).S	N	27.64	1340.8	12.3	447.945	3	51.97	34426	2	122	129	iTRAQ 4plex (K N-term)
tr|Q5HY54|Q5HY54_HUMAN	K.S(+144.10)ADFVVEAIGDDVGTLGFSVEGPSQAK(+144.10).I	Y	74.27	2982.5	-7.9	746.627	4	168.72	92264	13	594	620	iTRAQ 4plex (K N-term)
tr|Q5HY54|Q5HY54_HUMAN	K.V(+144.10)GSAADIPINISETDLSLLTATVVPPSGR.E	Y	74.13	3036.64	-24.4	1013.2	3	178.14	96920	10	1925	1953	iTRAQ 4plex (K N-term)
tr|Q5HY54|Q5HY54_HUMAN	K.V(+144.10)TVLFAGQHIAK(+144.10).S	Y	67.95	1570.94	-11.7	786.468	2	100.04	58200	5	356	367	iTRAQ 4plex (K N-term)
tr|Q5HY54|Q5HY54_HUMAN	R.L(+144.10)IALLEVLSQK(+144.10).K	N	63.67	1513.96	-7.3	757.984	2	177.75	96726	12	77	87	iTRAQ 4plex (K N-term)
tr|Q5HY54|Q5HY54_HUMAN	K.D(+144.10)AGEGGLSLAIEGPSK(+144.10).A	Y	60.11	1787.95	-0.3	596.989	3	92.33	54394	3	1852	1867	iTRAQ 4plex (K N-term)
tr|Q5HY54|Q5HY54_HUMAN	R.I(+144.10)ANLQTDLSDGLR.L	Y	58.86	1558.84	-9.3	780.421	2	106.17	61226	5	64	76	iTRAQ 4plex (K N-term)
tr|Q5HY54|Q5HY54_HUMAN	R.LIALLEVLSQK(+144.10).K	N	58.05	1369.86	-3	685.937	2	161.21	88567	5	77	87	iTRAQ 4plex (K N-term)
tr|Q5HY54|Q5HY54_HUMAN	R.G(+144.10)AGTGGLGLAVEGPSEAK(+144.10).M	Y	57.7	1858	-7.5	620.336	3	83.38	49970	1	1382	1399	iTRAQ 4plex (K N-term)
tr|Q5HY54|Q5HY54_HUMAN	R.E(+144.10)AGAGGLAIAVEGPSK(+144.10).A	Y	56.14	1713.95	8.4	572.327	3	86.65	51587	1	2225	2240	iTRAQ 4plex (K N-term)
tr|Q5HY54|Q5HY54_HUMAN	K.Y(+144.10)GGQPVPNFPSK(+144.10).L	Y	52.25	1577.84	5.5	526.957	3	79.01	47801	1	1235	1246	iTRAQ 4plex (Y); iTRAQ 4plex (K N-term)
tr|Q5HY54|Q5HY54_HUMAN	R.A(+144.10)LTQTGGPHVK(+144.10).A	Y	51.89	1395.8	6.1	466.278	3	41.48	29255	3	1284	1294	iTRAQ 4plex (K N-term)
tr|Q5HY54|Q5HY54_HUMAN	K.A(+144.10)GVAPLQVK(+144.10).V	Y	50.44	1169.73	3.2	585.876	2	65.61	41159	9	1478	1486	iTRAQ 4plex (K N-term)
tr|Q5HY54|Q5HY54_HUMAN	K.V(+144.10)YGPGVAK(+144.10).T	Y	45.85	1077.64	2.4	539.828	2	45.86	31414	5	774	781	iTRAQ 4plex (K N-term)
tr|Q5HY54|Q5HY54_HUMAN	R.E(+144.10)AMQQADDWLGIPQVITPEEIVDPNVDEHSVMTYLSQFPK(+144.10).A	Y	40.89	4857.37	-32.6	1215.31	4	184.37	100001	3	227	266	iTRAQ 4plex (K N-term)
tr|Q5HY54|Q5HY54_HUMAN	K.S(+144.10)PFEVYVDK(+144.10).S	Y	38.02	1370.73	-4.1	686.369	2	93.03	54736	1	368	376	iTRAQ 4plex (K N-term)
tr|Q5HY54|Q5HY54_HUMAN	K.L(+144.10)VSIDSK(+144.10).A	N	35.13	1048.63	2.7	525.325	2	59.92	38338	3	121	127	iTRAQ 4plex (K N-term)
tr|Q5HY54|Q5HY54_HUMAN	K.D(+144.10)K(+144.10)GEYTLVVK(+144.10).W	Y	34.9	1582.92	-18.5	792.454	2	65.86	41283	1	2582	2591	iTRAQ 4plex (K N-term)
tr|Q5HY54|Q5HY54_HUMAN	R.L(+144.10)SPFMADIR.D	Y	33.94	1192.64	-0.2	597.326	2	108.05	62160	1	656	664	iTRAQ 4plex (K N-term)
tr|Q5HY54|Q5HY54_HUMAN	R.A(+144.10)GGPGLER.A	N	32.39	899.493	6	450.756	2	19.14	18223	6	2203	2210	iTRAQ 4plex (K N-term)
tr|Q5HY54|Q5HY54_HUMAN	K.W(+144.10)GDEHIPGSPYR.V	Y	31.74	1556.75	7.7	519.927	3	75.14	45878	1	2592	2603	iTRAQ 4plex (K N-term)
tr|Q60FE5|Q60FE5_HUMAN	K.S(+144.10)ADFVVEAIGDDVGTLGFSVEGPSQAK(+144.10).I	Y	74.27	2982.5	-7.9	746.627	4	168.72	92264	13	567	593	iTRAQ 4plex (K N-term)
tr|Q60FE5|Q60FE5_HUMAN	K.V(+144.10)GSAADIPINISETDLSLLTATVVPPSGR.E	Y	74.13	3036.64	-24.4	1013.2	3	178.14	96920	10	1938	1966	iTRAQ 4plex (K N-term)
tr|Q60FE5|Q60FE5_HUMAN	K.V(+144.10)TVLFAGQHIAK(+144.10).S	Y	67.95	1570.94	-11.7	786.468	2	100.04	58200	5	329	340	iTRAQ 4plex (K N-term)
tr|Q60FE5|Q60FE5_HUMAN	R.L(+144.10)IALLEVLSQK(+144.10).K	N	63.67	1513.96	-7.3	757.984	2	177.75	96726	12	50	60	iTRAQ 4plex (K N-term)
tr|Q60FE5|Q60FE5_HUMAN	K.D(+144.10)AGEGGLSLAIEGPSK(+144.10).A	Y	60.11	1787.95	-0.3	596.989	3	92.33	54394	3	1865	1880	iTRAQ 4plex (K N-term)
tr|Q60FE5|Q60FE5_HUMAN	R.I(+144.10)ANLQTDLSDGLR.L	Y	58.86	1558.84	-9.3	780.421	2	106.17	61226	5	37	49	iTRAQ 4plex (K N-term)
tr|Q60FE5|Q60FE5_HUMAN	R.LIALLEVLSQK(+144.10).K	N	58.05	1369.86	-3	685.937	2	161.21	88567	5	50	60	iTRAQ 4plex (K N-term)
tr|Q60FE5|Q60FE5_HUMAN	R.G(+144.10)AGTGGLGLAVEGPSEAK(+144.10).M	Y	57.7	1858	-7.5	620.336	3	83.38	49970	1	1355	1372	iTRAQ 4plex (K N-term)
tr|Q60FE5|Q60FE5_HUMAN	R.E(+144.10)AGAGGLAIAVEGPSK(+144.10).A	Y	56.14	1713.95	8.4	572.327	3	86.65	51587	1	2238	2253	iTRAQ 4plex (K N-term)
tr|Q60FE5|Q60FE5_HUMAN	K.Y(+144.10)GGQPVPNFPSK(+144.10).L	Y	52.25	1577.84	5.5	526.957	3	79.01	47801	1	1208	1219	iTRAQ 4plex (Y); iTRAQ 4plex (K N-term)
tr|Q60FE5|Q60FE5_HUMAN	R.A(+144.10)LTQTGGPHVK(+144.10).A	Y	51.89	1395.8	6.1	466.278	3	41.48	29255	3	1257	1267	iTRAQ 4plex (K N-term)
tr|Q60FE5|Q60FE5_HUMAN	K.A(+144.10)GVAPLQVK(+144.10).V	Y	50.44	1169.73	3.2	585.876	2	65.61	41159	9	1451	1459	iTRAQ 4plex (K N-term)
tr|Q60FE5|Q60FE5_HUMAN	K.V(+144.10)YGPGVAK(+144.10).T	Y	45.85	1077.64	2.4	539.828	2	45.86	31414	5	747	754	iTRAQ 4plex (K N-term)
tr|Q60FE5|Q60FE5_HUMAN	R.E(+144.10)AMQQADDWLGIPQVITPEEIVDPNVDEHSVMTYLSQFPK(+144.10).A	Y	40.89	4857.37	-32.6	1215.31	4	184.37	100001	3	200	239	iTRAQ 4plex (K N-term)
tr|Q60FE5|Q60FE5_HUMAN	K.S(+144.10)PFEVYVDK(+144.10).S	Y	38.02	1370.73	-4.1	686.369	2	93.03	54736	1	341	349	iTRAQ 4plex (K N-term)
tr|Q60FE5|Q60FE5_HUMAN	K.L(+144.10)VSIDSK(+144.10).A	N	35.13	1048.63	2.7	525.325	2	59.92	38338	3	94	100	iTRAQ 4plex (K N-term)
tr|Q60FE5|Q60FE5_HUMAN	K.D(+144.10)K(+144.10)GEYTLVVK(+144.10).W	Y	34.9	1582.92	-18.5	792.454	2	65.86	41283	1	2595	2604	iTRAQ 4plex (K N-term)
tr|Q60FE5|Q60FE5_HUMAN	R.L(+144.10)SPFMADIR.D	Y	33.94	1192.64	-0.2	597.326	2	108.05	62160	1	629	637	iTRAQ 4plex (K N-term)
tr|Q60FE5|Q60FE5_HUMAN	R.A(+144.10)GGPGLER.A	N	32.39	899.493	6	450.756	2	19.14	18223	6	2216	2223	iTRAQ 4plex (K N-term)
tr|Q60FE5|Q60FE5_HUMAN	K.W(+144.10)GDEHIPGSPYR.V	Y	31.74	1556.75	7.7	519.927	3	75.14	45878	1	2605	2616	iTRAQ 4plex (K N-term)
sp|P21333|FLNA_HUMAN	K.S(+144.10)ADFVVEAIGDDVGTLGFSVEGPSQAK(+144.10).I	Y	74.27	2982.5	-7.9	746.627	4	168.72	92264	13	594	620	iTRAQ 4plex (K N-term)
sp|P21333|FLNA_HUMAN	K.V(+144.10)GSAADIPINISETDLSLLTATVVPPSGR.E	Y	74.13	3036.64	-24.4	1013.2	3	178.14	96920	10	1965	1993	iTRAQ 4plex (K N-term)
sp|P21333|FLNA_HUMAN	K.V(+144.10)TVLFAGQHIAK(+144.10).S	Y	67.95	1570.94	-11.7	786.468	2	100.04	58200	5	356	367	iTRAQ 4plex (K N-term)
sp|P21333|FLNA_HUMAN	R.L(+144.10)IALLEVLSQK(+144.10).K	N	63.67	1513.96	-7.3	757.984	2	177.75	96726	12	77	87	iTRAQ 4plex (K N-term)
sp|P21333|FLNA_HUMAN	K.D(+144.10)AGEGGLSLAIEGPSK(+144.10).A	Y	60.11	1787.95	-0.3	596.989	3	92.33	54394	3	1892	1907	iTRAQ 4plex (K N-term)
sp|P21333|FLNA_HUMAN	R.I(+144.10)ANLQTDLSDGLR.L	Y	58.86	1558.84	-9.3	780.421	2	106.17	61226	5	64	76	iTRAQ 4plex (K N-term)
sp|P21333|FLNA_HUMAN	R.LIALLEVLSQK(+144.10).K	N	58.05	1369.86	-3	685.937	2	161.21	88567	5	77	87	iTRAQ 4plex (K N-term)
sp|P21333|FLNA_HUMAN	R.G(+144.10)AGTGGLGLAVEGPSEAK(+144.10).M	Y	57.7	1858	-7.5	620.336	3	83.38	49970	1	1382	1399	iTRAQ 4plex (K N-term)
sp|P21333|FLNA_HUMAN	R.E(+144.10)AGAGGLAIAVEGPSK(+144.10).A	Y	56.14	1713.95	8.4	572.327	3	86.65	51587	1	2265	2280	iTRAQ 4plex (K N-term)
sp|P21333|FLNA_HUMAN	K.Y(+144.10)GGQPVPNFPSK(+144.10).L	Y	52.25	1577.84	5.5	526.957	3	79.01	47801	1	1235	1246	iTRAQ 4plex (Y); iTRAQ 4plex (K N-term)
sp|P21333|FLNA_HUMAN	R.A(+144.10)LTQTGGPHVK(+144.10).A	Y	51.89	1395.8	6.1	466.278	3	41.48	29255	3	1284	1294	iTRAQ 4plex (K N-term)
sp|P21333|FLNA_HUMAN	K.A(+144.10)GVAPLQVK(+144.10).V	Y	50.44	1169.73	3.2	585.876	2	65.61	41159	9	1478	1486	iTRAQ 4plex (K N-term)
sp|P21333|FLNA_HUMAN	K.V(+144.10)YGPGVAK(+144.10).T	Y	45.85	1077.64	2.4	539.828	2	45.86	31414	5	774	781	iTRAQ 4plex (K N-term)
sp|P21333|FLNA_HUMAN	R.E(+144.10)AMQQADDWLGIPQVITPEEIVDPNVDEHSVMTYLSQFPK(+144.10).A	Y	40.89	4857.37	-32.6	1215.31	4	184.37	100001	3	227	266	iTRAQ 4plex (K N-term)
sp|P21333|FLNA_HUMAN	K.S(+144.10)PFEVYVDK(+144.10).S	Y	38.02	1370.73	-4.1	686.369	2	93.03	54736	1	368	376	iTRAQ 4plex (K N-term)
sp|P21333|FLNA_HUMAN	K.L(+144.10)VSIDSK(+144.10).A	N	35.13	1048.63	2.7	525.325	2	59.92	38338	3	121	127	iTRAQ 4plex (K N-term)
sp|P21333|FLNA_HUMAN	K.D(+144.10)K(+144.10)GEYTLVVK(+144.10).W	Y	34.9	1582.92	-18.5	792.454	2	65.86	41283	1	2622	2631	iTRAQ 4plex (K N-term)
sp|P21333|FLNA_HUMAN	R.L(+144.10)SPFMADIR.D	Y	33.94	1192.64	-0.2	597.326	2	108.05	62160	1	656	664	iTRAQ 4plex (K N-term)
sp|P21333|FLNA_HUMAN	R.A(+144.10)GGPGLER.A	N	32.39	899.493	6	450.756	2	19.14	18223	6	2243	2250	iTRAQ 4plex (K N-term)
sp|P21333|FLNA_HUMAN	K.W(+144.10)GDEHIPGSPYR.V	Y	31.74	1556.75	7.7	519.927	3	75.14	45878	1	2632	2643	iTRAQ 4plex (K N-term)
tr|A0A087WWY3|A0A087WWY3_HUMAN	K.S(+144.10)ADFVVEAIGDDVGTLGFSVEGPSQAK(+144.10).I	Y	74.27	2982.5	-7.9	746.627	4	168.72	92264	13	567	593	iTRAQ 4plex (K N-term)
tr|A0A087WWY3|A0A087WWY3_HUMAN	K.V(+144.10)TVLFAGQHIAK(+144.10).S	Y	67.95	1570.94	-11.7	786.468	2	100.04	58200	5	329	340	iTRAQ 4plex (K N-term)
tr|A0A087WWY3|A0A087WWY3_HUMAN	R.L(+144.10)IALLEVLSQK(+144.10).K	N	63.67	1513.96	-7.3	757.984	2	177.75	96726	12	50	60	iTRAQ 4plex (K N-term)
tr|A0A087WWY3|A0A087WWY3_HUMAN	K.D(+144.10)AGEGGLSLAIEGPSK(+144.10).A	Y	60.11	1787.95	-0.3	596.989	3	92.33	54394	3	1865	1880	iTRAQ 4plex (K N-term)
tr|A0A087WWY3|A0A087WWY3_HUMAN	R.I(+144.10)ANLQTDLSDGLR.L	Y	58.86	1558.84	-9.3	780.421	2	106.17	61226	5	37	49	iTRAQ 4plex (K N-term)
tr|A0A087WWY3|A0A087WWY3_HUMAN	R.LIALLEVLSQK(+144.10).K	N	58.05	1369.86	-3	685.937	2	161.21	88567	5	50	60	iTRAQ 4plex (K N-term)
tr|A0A087WWY3|A0A087WWY3_HUMAN	R.G(+144.10)AGTGGLGLAVEGPSEAK(+144.10).M	Y	57.7	1858	-7.5	620.336	3	83.38	49970	1	1355	1372	iTRAQ 4plex (K N-term)
tr|A0A087WWY3|A0A087WWY3_HUMAN	K.Y(+144.10)GGQPVPNFPSK(+144.10).L	Y	52.25	1577.84	5.5	526.957	3	79.01	47801	1	1208	1219	iTRAQ 4plex (Y); iTRAQ 4plex (K N-term)
tr|A0A087WWY3|A0A087WWY3_HUMAN	R.A(+144.10)LTQTGGPHVK(+144.10).A	Y	51.89	1395.8	6.1	466.278	3	41.48	29255	3	1257	1267	iTRAQ 4plex (K N-term)
tr|A0A087WWY3|A0A087WWY3_HUMAN	K.A(+144.10)GVAPLQVK(+144.10).V	Y	50.44	1169.73	3.2	585.876	2	65.61	41159	9	1451	1459	iTRAQ 4plex (K N-term)
tr|A0A087WWY3|A0A087WWY3_HUMAN	K.V(+144.10)YGPGVAK(+144.10).T	Y	45.85	1077.64	2.4	539.828	2	45.86	31414	5	747	754	iTRAQ 4plex (K N-term)
tr|A0A087WWY3|A0A087WWY3_HUMAN	R.E(+144.10)AMQQADDWLGIPQVITPEEIVDPNVDEHSVMTYLSQFPK(+144.10).A	Y	40.89	4857.37	-32.6	1215.31	4	184.37	100001	3	200	239	iTRAQ 4plex (K N-term)
tr|A0A087WWY3|A0A087WWY3_HUMAN	K.S(+144.10)PFEVYVDK(+144.10).S	Y	38.02	1370.73	-4.1	686.369	2	93.03	54736	1	341	349	iTRAQ 4plex (K N-term)
tr|A0A087WWY3|A0A087WWY3_HUMAN	K.L(+144.10)VSIDSK(+144.10).A	N	35.13	1048.63	2.7	525.325	2	59.92	38338	3	94	100	iTRAQ 4plex (K N-term)
tr|A0A087WWY3|A0A087WWY3_HUMAN	K.D(+144.10)K(+144.10)GEYTLVVK(+144.10).W	Y	34.9	1582.92	-18.5	792.454	2	65.86	41283	1	2290	2299	iTRAQ 4plex (K N-term)
tr|A0A087WWY3|A0A087WWY3_HUMAN	R.L(+144.10)SPFMADIR.D	Y	33.94	1192.64	-0.2	597.326	2	108.05	62160	1	629	637	iTRAQ 4plex (K N-term)
tr|A0A087WWY3|A0A087WWY3_HUMAN	K.W(+144.10)GDEHIPGSPYR.V	Y	31.74	1556.75	7.7	519.927	3	75.14	45878	1	2300	2311	iTRAQ 4plex (K N-term)
tr|F8WE98|F8WE98_HUMAN	K.V(+144.10)TVLFAGQHIAK(+144.10).S	Y	67.95	1570.94	-11.7	786.468	2	100.04	58200	5	342	353	iTRAQ 4plex (K N-term)
tr|F8WE98|F8WE98_HUMAN	R.L(+144.10)IALLEVLSQK(+144.10).K	N	63.67	1513.96	-7.3	757.984	2	177.75	96726	12	63	73	iTRAQ 4plex (K N-term)
tr|F8WE98|F8WE98_HUMAN	R.I(+144.10)ANLQTDLSDGLR.L	Y	58.86	1558.84	-9.3	780.421	2	106.17	61226	5	50	62	iTRAQ 4plex (K N-term)
tr|F8WE98|F8WE98_HUMAN	R.LIALLEVLSQK(+144.10).K	N	58.05	1369.86	-3	685.937	2	161.21	88567	5	63	73	iTRAQ 4plex (K N-term)
tr|F8WE98|F8WE98_HUMAN	R.E(+144.10)AMQQADDWLGIPQVITPEEIVDPNVDEHSVMTYLSQFPK(+144.10).A	Y	40.89	4857.37	-32.6	1215.31	4	184.37	100001	3	213	252	iTRAQ 4plex (K N-term)
tr|F8WE98|F8WE98_HUMAN	K.S(+144.10)PFEVYVDK(+144.10).S	Y	38.02	1370.73	-4.1	686.369	2	93.03	54736	1	354	362	iTRAQ 4plex (K N-term)
tr|F8WE98|F8WE98_HUMAN	K.L(+144.10)VSIDSK(+144.10).A	N	35.13	1048.63	2.7	525.325	2	59.92	38338	3	107	113	iTRAQ 4plex (K N-term)
tr|H0Y5C6|H0Y5C6_HUMAN	R.E(+144.10)AGAGGLAIAVEGPSK(+144.10).A	Y	56.14	1713.95	8.4	572.327	3	86.65	51587	1	205	220	iTRAQ 4plex (K N-term)
tr|H0Y5C6|H0Y5C6_HUMAN	R.A(+144.10)GGPGLER.A	N	32.39	899.493	6	450.756	2	19.14	18223	6	183	190	iTRAQ 4plex (K N-term)
tr|H7C2E7|H7C2E7_HUMAN	K.V(+144.10)GSAADIPINISETDLSLLTATVVPPSGR.E	Y	74.13	3036.64	-24.4	1013.2	3	178.14	96920	10	27	55	iTRAQ 4plex (K N-term)
tr|H0Y5F3|H0Y5F3_HUMAN	K.V(+144.10)GSAADIPINISETDLSLLTATVVPPSGR.E	Y	74.13	3036.64	-24.4	1013.2	3	178.14	96920	10	190	218	iTRAQ 4plex (K N-term)
sp|P07900|HS90A_HUMAN	R.G(+144.10)VVDSEDLPLNISR.E	N	76.78	1656.88	-17	829.432	2	105.52	60907	13	387	400	iTRAQ 4plex (K N-term)
sp|P07900|HS90A_HUMAN	K.V(+144.10)ILHLK(+144.10)EDQTEYLEER.R	N	67.23	2302.24	-12.3	768.41	3	98.59	57486	9	186	201	iTRAQ 4plex (K N-term)
sp|P07900|HS90A_HUMAN	K.H(+144.10)NDDEQYAWESSAGGSFTVR.T	N	65.33	2399.05	-13.5	800.68	3	85.81	51171	7	154	173	iTRAQ 4plex (K N-term)
sp|P07900|HS90A_HUMAN	K.A(+144.10)DLINNLGTIAK(+144.10).S	N	63.43	1529.9	-9	765.949	2	108.83	62546	5	101	112	iTRAQ 4plex (K N-term)
sp|P07900|HS90A_HUMAN	K.D(+144.10)QVANSAFVER.L	Y	63.32	1378.69	-11.4	690.346	2	51.31	34100	7	500	510	iTRAQ 4plex (K N-term)
sp|P07900|HS90A_HUMAN	R.T(+144.10)LTIVDTGIGMTK(+144.10).A	N	63.15	1636.93	-16.9	819.457	2	111.85	64031	4	88	100	iTRAQ 4plex (K N-term)
sp|P07900|HS90A_HUMAN	R.V(+144.10)FIMDNC(+57.02)EELIPEYLNFIR.G	Y	57.86	2558.26	-15.5	853.749	3	178.69	97192	1	368	386	iTRAQ 4plex (K N-term); Carbamidomethylation
sp|P07900|HS90A_HUMAN	K.H(+144.10)FSVEGQLEFR.A	N	56.27	1491.76	12.3	498.266	3	87.56	52035	6	328	338	iTRAQ 4plex (K N-term)
sp|P07900|HS90A_HUMAN	R.Y(+144.10)ESLTDPSK(+144.10).L	N	50.25	1326.69	-18.5	664.338	2	51.78	34330	4	61	69	iTRAQ 4plex (Y); iTRAQ 4plex (K N-term)
sp|P07900|HS90A_HUMAN	K.L(+144.10)GIHEDSQNR.K	Y	49.64	1311.66	15.5	438.235	3	28.11	22668	12	447	456	iTRAQ 4plex (K N-term)
sp|P07900|HS90A_HUMAN	R.Y(+144.10)ESLTDPSK(+144.10)LDSGK(+144.10).E	N	49.3	1971.05	12.6	493.775	4	73.71	45172	1	61	74	iTRAQ 4plex (Y); iTRAQ 4plex (K N-term)
sp|P07900|HS90A_HUMAN	K.A(+144.10)DLIN(+.98)NLGTIAK(+144.10).S	N	47.44	1530.88	-7.7	766.442	2	99.86	58112	1	101	112	iTRAQ 4plex (K N-term); Deamidation (NQ)
sp|P07900|HS90A_HUMAN	R.R(+144.10)APFDLFENR.K	Y	38.31	1407.74	13.8	470.259	3	98.39	57391	8	346	355	iTRAQ 4plex (K N-term)
sp|P07900|HS90A_HUMAN	R.E(+144.10)MLQQSK(+144.10).I	N	35.76	1150.62	-8.4	576.313	2	29.32	23265	7	401	407	iTRAQ 4plex (K N-term)
sp|P07900|HS90A_HUMAN	K.F(+144.10)YEQFSK(+144.10).N	Y	35.49	1235.64	-1.7	618.826	2	70.92	43799	7	437	443	iTRAQ 4plex (K N-term)
sp|P07900|HS90A_HUMAN	K.Y(+144.10)IDQEELNK(+144.10).T	N	35.31	1438.75	12.3	480.597	3	61.51	39134	4	284	292	iTRAQ 4plex (Y); iTRAQ 4plex (K N-term)
sp|P07900|HS90A_HUMAN	K.T(+144.10)LVSVTK(+144.10).E	Y	32.49	1034.65	8.1	518.338	2	56.29	36562	11	540	546	iTRAQ 4plex (K N-term)
sp|P07900|HS90A_HUMAN	R.A(+144.10)LLFVPR.R	N	27.89	958.606	11.6	480.316	2	101.32	58826	8	339	345	iTRAQ 4plex (K N-term)
sp|P07900|HS90A_HUMAN	K.V(+144.10)VVSNR.L	Y	26.23	816.492	17.1	409.26	2	19.07	18186	13	586	591	iTRAQ 4plex (K N-term)
sp|P07900|HS90A_HUMAN	K.T(+144.10)K(+144.10)PIWTR.N	N	26.13	1188.72	22.8	397.256	3	46.01	31486	12	293	299	iTRAQ 4plex (K N-term)
sp|P07900|HS90A_HUMAN	K.L(+144.10)SELLR.Y	N	25.07	873.538	17.4	437.784	2	81.51	49032	18	459	464	iTRAQ 4plex (K N-term)
sp|P07900|HS90A_HUMAN	K.TLVSVTK(+144.10).E	Y	22.52	890.554	5.6	446.287	2	47.79	32368	3	540	546	iTRAQ 4plex (K N-term)
sp|P07900|HS90A_HUMAN	S.N(+144.10)K(+144.10)EIFLR.E	N	21.81	1206.73	20.5	403.258	3	57.21	37006	2	40	46	iTRAQ 4plex (K N-term)
sp|Q58FG1|HS904_HUMAN	R.T(+144.10)LTIVDTGIGMTK(+144.10).A	N	63.15	1636.93	-16.9	819.457	2	111.85	64031	4	28	40	iTRAQ 4plex (K N-term)
sp|Q58FG1|HS904_HUMAN	K.H(+144.10)FSVEGQLEFR.A	N	56.27	1491.76	12.3	498.266	3	87.56	52035	6	132	142	iTRAQ 4plex (K N-term)
sp|Q58FG1|HS904_HUMAN	K.T(+144.10)LVSVTK(+144.10).E	Y	32.49	1034.65	8.1	518.338	2	56.29	36562	11	248	254	iTRAQ 4plex (K N-term)
sp|Q58FG1|HS904_HUMAN	K.TLVSVTK(+144.10).E	Y	22.52	890.554	5.6	446.287	2	47.79	32368	3	248	254	iTRAQ 4plex (K N-term)
tr|H7C0U5|H7C0U5_HUMAN	V.T(+144.10)LVSVTK(+144.10).E	Y	32.49	1034.65	8.1	518.338	2	56.29	36562	11	109	115	iTRAQ 4plex (K N-term)
tr|H7C0U5|H7C0U5_HUMAN	V.TLVSVTK(+144.10).E	Y	22.52	890.554	5.6	446.287	2	47.79	32368	3	109	115	iTRAQ 4plex (K N-term)
tr|F5H7B7|F5H7B7_HUMAN	V.T(+144.10)LVSVTK(+144.10).E	Y	32.49	1034.65	8.1	518.338	2	56.29	36562	11	1150	1156	iTRAQ 4plex (K N-term)
tr|F5H7B7|F5H7B7_HUMAN	V.TLVSVTK(+144.10).E	Y	22.52	890.554	5.6	446.287	2	47.79	32368	3	1150	1156	iTRAQ 4plex (K N-term)
sp|Q86UQ4|ABCAD_HUMAN	V.T(+144.10)LVSVTK(+144.10).E	Y	32.49	1034.65	8.1	518.338	2	56.29	36562	11	3843	3849	iTRAQ 4plex (K N-term)
sp|Q86UQ4|ABCAD_HUMAN	V.TLVSVTK(+144.10).E	Y	22.52	890.554	5.6	446.287	2	47.79	32368	3	3843	3849	iTRAQ 4plex (K N-term)
tr|A0A0A0MT16|A0A0A0MT16_HUMAN	V.T(+144.10)LVSVTK(+144.10).E	Y	32.49	1034.65	8.1	518.338	2	56.29	36562	11	3843	3849	iTRAQ 4plex (K N-term)
tr|A0A0A0MT16|A0A0A0MT16_HUMAN	V.TLVSVTK(+144.10).E	Y	22.52	890.554	5.6	446.287	2	47.79	32368	3	3843	3849	iTRAQ 4plex (K N-term)
sp|P11021|GRP78_HUMAN	K.S(+144.10)QIFSTASDNQPTVTIK(+144.10).V	Y	71.72	2124.13	-9.6	709.043	3	94.63	55528	4	448	464	iTRAQ 4plex (K N-term)
sp|P11021|GRP78_HUMAN	K.D(+144.10)AGTIAGLNVMR.I	Y	71.02	1360.72	-9.3	681.363	2	89.08	52778	7	186	197	iTRAQ 4plex (K N-term)
sp|P11021|GRP78_HUMAN	R.I(+144.10)TPSYVAFTPEGER.L	Y	65.95	1709.87	-13.5	855.932	2	100.67	58508	7	61	74	iTRAQ 4plex (K N-term)
sp|P11021|GRP78_HUMAN	R.N(+144.10)ELESYAYSLK(+144.10).N	Y	63.94	1603.83	-14.6	802.91	2	98	57200	2	563	573	iTRAQ 4plex (K N-term)
sp|P11021|GRP78_HUMAN	K.V(+144.10)THAVVTVPAYFNDAQR.Q	Y	63.89	2031.06	-8.3	678.023	3	102.38	59356	1	165	181	iTRAQ 4plex (K N-term)
sp|P11021|GRP78_HUMAN	K.T(+144.10)FAPEEISAMVLTK(+144.10).M	Y	62.47	1823.99	5	609.007	3	141.89	78996	2	139	152	iTRAQ 4plex (K N-term)
sp|P11021|GRP78_HUMAN	R.V(+144.10)EIIANDQGNR.I	N	55.6	1371.72	-8.6	686.862	2	53.35	35112	13	50	60	iTRAQ 4plex (K N-term)
sp|P11021|GRP78_HUMAN	K.I(+144.10)TITNDQNR.L	Y	54.91	1217.65	-7.2	609.826	2	39.6	28336	13	524	532	iTRAQ 4plex (K N-term)
sp|P11021|GRP78_HUMAN	K.T(+144.10)K(+144.10)PYIQVDIGGGQTK(+144.10).T	Y	52.63	2036.16	7.6	510.05	4	82.38	49470	3	124	138	iTRAQ 4plex (K N-term)
sp|P11021|GRP78_HUMAN	K.N(+144.10)QLTSNPENTVFDAK(+144.10).R	Y	49.6	1965	-5.7	656.004	3	83.4	49982	1	82	96	iTRAQ 4plex (K N-term)
sp|P11021|GRP78_HUMAN	K.V(+144.10)YEGERPLTK(+144.10).D	Y	48.96	1478.83	7.3	493.954	3	49.75	33328	9	465	474	iTRAQ 4plex (K N-term)
sp|P11021|GRP78_HUMAN	R.T(+144.10)WNDPSVQQDIK(+144.10).F	Y	46.67	1717.88	1.9	573.636	3	71.3	43987	2	102	113	iTRAQ 4plex (K N-term)
sp|P11021|GRP78_HUMAN	K.M(+144.10)K(+144.10)ETAEAYLGK(+144.10).K	Y	44.54	1671.92	3.6	558.315	3	75.01	45813	8	153	163	iTRAQ 4plex (K N-term)
sp|P11021|GRP78_HUMAN	R.A(+144.10)K(+144.10)FEELNMDLFR.S	Y	39.62	1799.94	1.6	600.99	3	126.63	71396	2	325	336	iTRAQ 4plex (K N-term)
sp|P11021|GRP78_HUMAN	K.V(+144.10)LEDSDLK(+144.10).K	Y	34.12	1205.67	-0.7	603.842	2	58.8	37784	3	345	352	iTRAQ 4plex (K N-term)
sp|P11021|GRP78_HUMAN	R.V(+144.10)MEHFIK(+144.10).L	Y	29.33	1190.67	24.1	397.906	3	68.67	42671	1	262	268	iTRAQ 4plex (K N-term)
sp|P11021|GRP78_HUMAN	R.L(+144.10)IGDAAK(+144.10).N	N	29.31	974.596	-5.2	488.303	2	44.01	30502	16	75	81	iTRAQ 4plex (K N-term)
sp|P11021|GRP78_HUMAN	R.A(+144.10)LSSQHQAR.I	Y	27.98	1140.61	13.8	381.216	3	8.1	12775	2	298	306	iTRAQ 4plex (K N-term)
sp|P11021|GRP78_HUMAN	R.M(+144.10)VNDAEK(+144.10).F	Y	23.55	1093.56	0.2	547.789	2	24.52	20887	2	541	547	iTRAQ 4plex (K N-term)
sp|P11021|GRP78_HUMAN	K.I(+144.10)QQLVK(+144.10).E	Y	21.74	1015.66	5.6	508.84	2	60.08	38419	6	371	376	iTRAQ 4plex (K N-term)
sp|Q8TCS8|PNPT1_HUMAN	G.I(+144.10)QQLVK(+144.10).E	Y	21.74	1015.66	5.6	508.84	2	60.08	38419	6	259	264	iTRAQ 4plex (K N-term)
sp|P68032|ACTC_HUMAN	K.S(+144.10)YELPDGQVITIGNER.F	N	78.43	1933.98	-1.3	645.668	3	115.06	65625	21	241	256	iTRAQ 4plex (K N-term)
sp|P68032|ACTC_HUMAN	K.S(+144.10)Y(+144.10)ELPDGQVITIGNER.F	N	78.18	2078.08	-6	693.698	3	100.27	58310	8	241	256	iTRAQ 4plex (K N-term); iTRAQ 4plex (Y)
sp|P68032|ACTC_HUMAN	R.HQGVMVGMGQK(+144.10).D	N	74.32	1314.66	-10.3	658.332	2	43.29	30151	10	42	52	iTRAQ 4plex (K N-term)
sp|P68032|ACTC_HUMAN	R.H(+144.10)QGVMVGMGQK(+144.10).D	N	70.04	1458.76	8.7	487.266	3	45.29	31137	18	42	52	iTRAQ 4plex (K N-term)
sp|P68032|ACTC_HUMAN	R.A(+144.10)VFPSIVGRPR.H	N	66.69	1341.8	19.5	448.282	3	88.64	52561	26	31	41	iTRAQ 4plex (K N-term)
sp|P68032|ACTC_HUMAN	K.A(+144.10)GFAGDDAPR.A	N	66.12	1119.54	-3.3	560.776	2	33.09	25122	20	21	30	iTRAQ 4plex (K N-term)
sp|P68032|ACTC_HUMAN	K.Y(+144.10)PIEHGIITNWDDMEK(+144.10).I	Y	64.65	2248.1	-7.2	750.37	3	111.98	64097	11	71	86	iTRAQ 4plex (Y); iTRAQ 4plex (K N-term)
sp|P68032|ACTC_HUMAN	K.E(+144.10)ITALAPSTMK(+144.10).I	N	63.77	1448.81	-6	725.409	2	85.52	51027	24	318	328	iTRAQ 4plex (K N-term)
sp|P68032|ACTC_HUMAN	R.H(+144.10)QGVMVGM(+15.99)GQK(+144.10).D	N	56.4	1474.76	4.9	492.596	3	28.02	22627	10	42	52	iTRAQ 4plex (K N-term); Oxidation (M)
sp|P68032|ACTC_HUMAN	K.I(+144.10)WHHTFYNELR.V	N	56.3	1658.84	-19.2	830.412	2	80.53	48554	14	87	97	iTRAQ 4plex (K N-term)
sp|P68032|ACTC_HUMAN	K.D(+144.10)SYVGDEAQSK(+144.10).R	N	55.37	1485.71	5.9	496.248	3	31.09	24134	12	53	63	iTRAQ 4plex (K N-term)
sp|P68032|ACTC_HUMAN	K.Y(+144.10)(+144.10)PIEHGIITNWDDMEK(+144.10).I	Y	51.7	2392.2	-9.1	798.401	3	99.98	58168	2	71	86	iTRAQ 4plex (K N-term); iTRAQ 4plex (Y)
sp|P68032|ACTC_HUMAN	R.D(+144.10)LTDYLMK(+144.10).I	N	51.64	1285.68	0.3	643.847	2	98.49	57440	20	186	193	iTRAQ 4plex (K N-term)
sp|P68032|ACTC_HUMAN	R.H(+144.10)QGVM(+15.99)VGMGQK(+144.10).D	N	51.11	1474.76	8	492.597	3	36.12	26620	7	42	52	iTRAQ 4plex (K N-term); Oxidation (M)
sp|P68032|ACTC_HUMAN	R.A(+144.10)VFPSIVGR.P	N	46.22	1088.64	7.9	545.334	2	94.64	55532	23	31	39	iTRAQ 4plex (K N-term)
sp|P68032|ACTC_HUMAN	K.E(+144.10)ITALAPSTM(+15.99)K(+144.10).I	N	44.73	1464.81	16	489.284	3	69.95	43313	3	318	328	iTRAQ 4plex (K N-term); Oxidation (M)
sp|P68032|ACTC_HUMAN	K.Y(+144.10)PIEHGIITNWDDM(+15.99)EK(+144.10).I	Y	42.85	2264.1	2	567.033	4	98.78	57581	9	71	86	iTRAQ 4plex (Y); Oxidation (M); iTRAQ 4plex (K N-term)
sp|P68032|ACTC_HUMAN	K.IWHHTFYNELR.V	N	42.7	1514.74	-15.2	758.367	2	67.58	42130	2	87	97
sp|P68032|ACTC_HUMAN	K.I(+144.10)WHHTFY(+144.10)NELR.V	N	34.98	1802.94	-19.1	902.461	2	71.24	43956	11	87	97	iTRAQ 4plex (K N-term); iTRAQ 4plex (Y)
sp|P68032|ACTC_HUMAN	R.D(+144.10)LTDY(+144.10)LMK(+144.10).I	N	34.75	1429.78	14.8	477.607	3	86.49	51505	6	186	193	iTRAQ 4plex (K N-term); iTRAQ 4plex (Y)
sp|P68032|ACTC_HUMAN	K.I(+144.10)IAPPER.K	N	34.74	938.565	12.4	470.296	2	53.56	35215	25	331	337	iTRAQ 4plex (K N-term)
sp|P68032|ACTC_HUMAN	R.D(+144.10)LTDYLM(+15.99)K(+144.10).I	N	30.2	1301.67	-2.7	651.842	2	85.6	51068	11	186	193	iTRAQ 4plex (K N-term); Oxidation (M)
sp|P68032|ACTC_HUMAN	K.I(+144.10)IAPPERK(+144.10).Y	N	28.74	1210.76	21.1	404.603	3	51.37	34127	17	331	338	iTRAQ 4plex (K N-term)
sp|P68032|ACTC_HUMAN	K.IIAPPER.K	N	28.05	794.465	11.2	398.244	2	36.89	27009	1	331	337
sp|P68032|ACTC_HUMAN	R.L(+144.10)DLAGR.D	N	26.11	787.465	21.9	394.749	2	43.95	30473	21	180	185	iTRAQ 4plex (K N-term)
sp|P68032|ACTC_HUMAN	F.PSIVGRPR.H	N	24.74	880.524	19.4	441.278	2	88.75	52615	4	34	41
sp|P68032|ACTC_HUMAN	K.R(+144.10)GILTLK(+144.10).Y	N	24.63	1087.73	4.1	544.874	2	63.71	40222	18	64	70	iTRAQ 4plex (K N-term)
sp|P68032|ACTC_HUMAN	R.G(+144.10)ILTLK(+144.10).Y	N	22.17	931.627	17.3	466.829	2	77.09	46854	31	65	70	iTRAQ 4plex (K N-term)
sp|P68133|ACTS_HUMAN	K.S(+144.10)YELPDGQVITIGNER.F	N	78.43	1933.98	-1.3	645.668	3	115.06	65625	21	241	256	iTRAQ 4plex (K N-term)
sp|P68133|ACTS_HUMAN	K.S(+144.10)Y(+144.10)ELPDGQVITIGNER.F	N	78.18	2078.08	-6	693.698	3	100.27	58310	8	241	256	iTRAQ 4plex (K N-term); iTRAQ 4plex (Y)
sp|P68133|ACTS_HUMAN	R.HQGVMVGMGQK(+144.10).D	N	74.32	1314.66	-10.3	658.332	2	43.29	30151	10	42	52	iTRAQ 4plex (K N-term)
sp|P68133|ACTS_HUMAN	R.H(+144.10)QGVMVGMGQK(+144.10).D	N	70.04	1458.76	8.7	487.266	3	45.29	31137	18	42	52	iTRAQ 4plex (K N-term)
sp|P68133|ACTS_HUMAN	R.A(+144.10)VFPSIVGRPR.H	N	66.69	1341.8	19.5	448.282	3	88.64	52561	26	31	41	iTRAQ 4plex (K N-term)
sp|P68133|ACTS_HUMAN	K.A(+144.10)GFAGDDAPR.A	N	66.12	1119.54	-3.3	560.776	2	33.09	25122	20	21	30	iTRAQ 4plex (K N-term)
sp|P68133|ACTS_HUMAN	K.Y(+144.10)PIEHGIITNWDDMEK(+144.10).I	Y	64.65	2248.1	-7.2	750.37	3	111.98	64097	11	71	86	iTRAQ 4plex (Y); iTRAQ 4plex (K N-term)
sp|P68133|ACTS_HUMAN	K.E(+144.10)ITALAPSTMK(+144.10).I	N	63.77	1448.81	-6	725.409	2	85.52	51027	24	318	328	iTRAQ 4plex (K N-term)
sp|P68133|ACTS_HUMAN	R.H(+144.10)QGVMVGM(+15.99)GQK(+144.10).D	N	56.4	1474.76	4.9	492.596	3	28.02	22627	10	42	52	iTRAQ 4plex (K N-term); Oxidation (M)
sp|P68133|ACTS_HUMAN	K.I(+144.10)WHHTFYNELR.V	N	56.3	1658.84	-19.2	830.412	2	80.53	48554	14	87	97	iTRAQ 4plex (K N-term)
sp|P68133|ACTS_HUMAN	K.D(+144.10)SYVGDEAQSK(+144.10).R	N	55.37	1485.71	5.9	496.248	3	31.09	24134	12	53	63	iTRAQ 4plex (K N-term)
sp|P68133|ACTS_HUMAN	K.Y(+144.10)(+144.10)PIEHGIITNWDDMEK(+144.10).I	Y	51.7	2392.2	-9.1	798.401	3	99.98	58168	2	71	86	iTRAQ 4plex (K N-term); iTRAQ 4plex (Y)
sp|P68133|ACTS_HUMAN	R.D(+144.10)LTDYLMK(+144.10).I	N	51.64	1285.68	0.3	643.847	2	98.49	57440	20	186	193	iTRAQ 4plex (K N-term)
sp|P68133|ACTS_HUMAN	R.H(+144.10)QGVM(+15.99)VGMGQK(+144.10).D	N	51.11	1474.76	8	492.597	3	36.12	26620	7	42	52	iTRAQ 4plex (K N-term); Oxidation (M)
sp|P68133|ACTS_HUMAN	R.A(+144.10)VFPSIVGR.P	N	46.22	1088.64	7.9	545.334	2	94.64	55532	23	31	39	iTRAQ 4plex (K N-term)
sp|P68133|ACTS_HUMAN	K.E(+144.10)ITALAPSTM(+15.99)K(+144.10).I	N	44.73	1464.81	16	489.284	3	69.95	43313	3	318	328	iTRAQ 4plex (K N-term); Oxidation (M)
sp|P68133|ACTS_HUMAN	K.Y(+144.10)PIEHGIITNWDDM(+15.99)EK(+144.10).I	Y	42.85	2264.1	2	567.033	4	98.78	57581	9	71	86	iTRAQ 4plex (Y); Oxidation (M); iTRAQ 4plex (K N-term)
sp|P68133|ACTS_HUMAN	K.IWHHTFYNELR.V	N	42.7	1514.74	-15.2	758.367	2	67.58	42130	2	87	97
sp|P68133|ACTS_HUMAN	K.I(+144.10)WHHTFY(+144.10)NELR.V	N	34.98	1802.94	-19.1	902.461	2	71.24	43956	11	87	97	iTRAQ 4plex (K N-term); iTRAQ 4plex (Y)
sp|P68133|ACTS_HUMAN	R.D(+144.10)LTDY(+144.10)LMK(+144.10).I	N	34.75	1429.78	14.8	477.607	3	86.49	51505	6	186	193	iTRAQ 4plex (K N-term); iTRAQ 4plex (Y)
sp|P68133|ACTS_HUMAN	K.I(+144.10)IAPPER.K	N	34.74	938.565	12.4	470.296	2	53.56	35215	25	331	337	iTRAQ 4plex (K N-term)
sp|P68133|ACTS_HUMAN	R.D(+144.10)LTDYLM(+15.99)K(+144.10).I	N	30.2	1301.67	-2.7	651.842	2	85.6	51068	11	186	193	iTRAQ 4plex (K N-term); Oxidation (M)
sp|P68133|ACTS_HUMAN	K.I(+144.10)IAPPERK(+144.10).Y	N	28.74	1210.76	21.1	404.603	3	51.37	34127	17	331	338	iTRAQ 4plex (K N-term)
sp|P68133|ACTS_HUMAN	K.IIAPPER.K	N	28.05	794.465	11.2	398.244	2	36.89	27009	1	331	337
sp|P68133|ACTS_HUMAN	R.L(+144.10)DLAGR.D	N	26.11	787.465	21.9	394.749	2	43.95	30473	21	180	185	iTRAQ 4plex (K N-term)
sp|P68133|ACTS_HUMAN	F.PSIVGRPR.H	N	24.74	880.524	19.4	441.278	2	88.75	52615	4	34	41
sp|P68133|ACTS_HUMAN	K.R(+144.10)GILTLK(+144.10).Y	N	24.63	1087.73	4.1	544.874	2	63.71	40222	18	64	70	iTRAQ 4plex (K N-term)
sp|P68133|ACTS_HUMAN	R.G(+144.10)ILTLK(+144.10).Y	N	22.17	931.627	17.3	466.829	2	77.09	46854	31	65	70	iTRAQ 4plex (K N-term)
sp|P63267|ACTH_HUMAN	K.S(+144.10)YELPDGQVITIGNER.F	N	78.43	1933.98	-1.3	645.668	3	115.06	65625	21	240	255	iTRAQ 4plex (K N-term)
sp|P63267|ACTH_HUMAN	K.S(+144.10)Y(+144.10)ELPDGQVITIGNER.F	N	78.18	2078.08	-6	693.698	3	100.27	58310	8	240	255	iTRAQ 4plex (K N-term); iTRAQ 4plex (Y)
sp|P63267|ACTH_HUMAN	R.HQGVMVGMGQK(+144.10).D	N	74.32	1314.66	-10.3	658.332	2	43.29	30151	10	41	51	iTRAQ 4plex (K N-term)
sp|P63267|ACTH_HUMAN	R.H(+144.10)QGVMVGMGQK(+144.10).D	N	70.04	1458.76	8.7	487.266	3	45.29	31137	18	41	51	iTRAQ 4plex (K N-term)
sp|P63267|ACTH_HUMAN	R.A(+144.10)VFPSIVGRPR.H	N	66.69	1341.8	19.5	448.282	3	88.64	52561	26	30	40	iTRAQ 4plex (K N-term)
sp|P63267|ACTH_HUMAN	K.A(+144.10)GFAGDDAPR.A	N	66.12	1119.54	-3.3	560.776	2	33.09	25122	20	20	29	iTRAQ 4plex (K N-term)
sp|P63267|ACTH_HUMAN	K.Y(+144.10)PIEHGIITNWDDMEK(+144.10).I	Y	64.65	2248.1	-7.2	750.37	3	111.98	64097	11	70	85	iTRAQ 4plex (Y); iTRAQ 4plex (K N-term)
sp|P63267|ACTH_HUMAN	K.E(+144.10)ITALAPSTMK(+144.10).I	N	63.77	1448.81	-6	725.409	2	85.52	51027	24	317	327	iTRAQ 4plex (K N-term)
sp|P63267|ACTH_HUMAN	R.H(+144.10)QGVMVGM(+15.99)GQK(+144.10).D	N	56.4	1474.76	4.9	492.596	3	28.02	22627	10	41	51	iTRAQ 4plex (K N-term); Oxidation (M)
sp|P63267|ACTH_HUMAN	K.D(+144.10)SYVGDEAQSK(+144.10).R	N	55.37	1485.71	5.9	496.248	3	31.09	24134	12	52	62	iTRAQ 4plex (K N-term)
sp|P63267|ACTH_HUMAN	K.Y(+144.10)(+144.10)PIEHGIITNWDDMEK(+144.10).I	Y	51.7	2392.2	-9.1	798.401	3	99.98	58168	2	70	85	iTRAQ 4plex (K N-term); iTRAQ 4plex (Y)
sp|P63267|ACTH_HUMAN	R.D(+144.10)LTDYLMK(+144.10).I	N	51.64	1285.68	0.3	643.847	2	98.49	57440	20	185	192	iTRAQ 4plex (K N-term)
sp|P63267|ACTH_HUMAN	R.H(+144.10)QGVM(+15.99)VGMGQK(+144.10).D	N	51.11	1474.76	8	492.597	3	36.12	26620	7	41	51	iTRAQ 4plex (K N-term); Oxidation (M)
sp|P63267|ACTH_HUMAN	R.A(+144.10)VFPSIVGR.P	N	46.22	1088.64	7.9	545.334	2	94.64	55532	23	30	38	iTRAQ 4plex (K N-term)
sp|P63267|ACTH_HUMAN	K.E(+144.10)ITALAPSTM(+15.99)K(+144.10).I	N	44.73	1464.81	16	489.284	3	69.95	43313	3	317	327	iTRAQ 4plex (K N-term); Oxidation (M)
sp|P63267|ACTH_HUMAN	K.Y(+144.10)PIEHGIITNWDDM(+15.99)EK(+144.10).I	Y	42.85	2264.1	2	567.033	4	98.78	57581	9	70	85	iTRAQ 4plex (Y); Oxidation (M); iTRAQ 4plex (K N-term)
sp|P63267|ACTH_HUMAN	R.D(+144.10)LTDY(+144.10)LMK(+144.10).I	N	34.75	1429.78	14.8	477.607	3	86.49	51505	6	185	192	iTRAQ 4plex (K N-term); iTRAQ 4plex (Y)
sp|P63267|ACTH_HUMAN	K.I(+144.10)IAPPER.K	N	34.74	938.565	12.4	470.296	2	53.56	35215	25	330	336	iTRAQ 4plex (K N-term)
sp|P63267|ACTH_HUMAN	R.D(+144.10)LTDYLM(+15.99)K(+144.10).I	N	30.2	1301.67	-2.7	651.842	2	85.6	51068	11	185	192	iTRAQ 4plex (K N-term); Oxidation (M)
sp|P63267|ACTH_HUMAN	K.I(+144.10)IAPPERK(+144.10).Y	N	28.74	1210.76	21.1	404.603	3	51.37	34127	17	330	337	iTRAQ 4plex (K N-term)
sp|P63267|ACTH_HUMAN	K.IIAPPER.K	N	28.05	794.465	11.2	398.244	2	36.89	27009	1	330	336
sp|P63267|ACTH_HUMAN	R.L(+144.10)DLAGR.D	N	26.11	787.465	21.9	394.749	2	43.95	30473	21	179	184	iTRAQ 4plex (K N-term)
sp|P63267|ACTH_HUMAN	F.PSIVGRPR.H	N	24.74	880.524	19.4	441.278	2	88.75	52615	4	33	40
sp|P63267|ACTH_HUMAN	K.R(+144.10)GILTLK(+144.10).Y	N	24.63	1087.73	4.1	544.874	2	63.71	40222	18	63	69	iTRAQ 4plex (K N-term)
sp|P63267|ACTH_HUMAN	R.G(+144.10)ILTLK(+144.10).Y	N	22.17	931.627	17.3	466.829	2	77.09	46854	31	64	69	iTRAQ 4plex (K N-term)
sp|P62736|ACTA_HUMAN	K.S(+144.10)YELPDGQVITIGNER.F	N	78.43	1933.98	-1.3	645.668	3	115.06	65625	21	241	256	iTRAQ 4plex (K N-term)
sp|P62736|ACTA_HUMAN	K.S(+144.10)Y(+144.10)ELPDGQVITIGNER.F	N	78.18	2078.08	-6	693.698	3	100.27	58310	8	241	256	iTRAQ 4plex (K N-term); iTRAQ 4plex (Y)
sp|P62736|ACTA_HUMAN	R.HQGVMVGMGQK(+144.10).D	N	74.32	1314.66	-10.3	658.332	2	43.29	30151	10	42	52	iTRAQ 4plex (K N-term)
sp|P62736|ACTA_HUMAN	R.H(+144.10)QGVMVGMGQK(+144.10).D	N	70.04	1458.76	8.7	487.266	3	45.29	31137	18	42	52	iTRAQ 4plex (K N-term)
sp|P62736|ACTA_HUMAN	R.A(+144.10)VFPSIVGRPR.H	N	66.69	1341.8	19.5	448.282	3	88.64	52561	26	31	41	iTRAQ 4plex (K N-term)
sp|P62736|ACTA_HUMAN	K.A(+144.10)GFAGDDAPR.A	N	66.12	1119.54	-3.3	560.776	2	33.09	25122	20	21	30	iTRAQ 4plex (K N-term)
sp|P62736|ACTA_HUMAN	K.Y(+144.10)PIEHGIITNWDDMEK(+144.10).I	Y	64.65	2248.1	-7.2	750.37	3	111.98	64097	11	71	86	iTRAQ 4plex (Y); iTRAQ 4plex (K N-term)
sp|P62736|ACTA_HUMAN	K.E(+144.10)ITALAPSTMK(+144.10).I	N	63.77	1448.81	-6	725.409	2	85.52	51027	24	318	328	iTRAQ 4plex (K N-term)
sp|P62736|ACTA_HUMAN	R.H(+144.10)QGVMVGM(+15.99)GQK(+144.10).D	N	56.4	1474.76	4.9	492.596	3	28.02	22627	10	42	52	iTRAQ 4plex (K N-term); Oxidation (M)
sp|P62736|ACTA_HUMAN	K.D(+144.10)SYVGDEAQSK(+144.10).R	N	55.37	1485.71	5.9	496.248	3	31.09	24134	12	53	63	iTRAQ 4plex (K N-term)
sp|P62736|ACTA_HUMAN	K.Y(+144.10)(+144.10)PIEHGIITNWDDMEK(+144.10).I	Y	51.7	2392.2	-9.1	798.401	3	99.98	58168	2	71	86	iTRAQ 4plex (K N-term); iTRAQ 4plex (Y)
sp|P62736|ACTA_HUMAN	R.D(+144.10)LTDYLMK(+144.10).I	N	51.64	1285.68	0.3	643.847	2	98.49	57440	20	186	193	iTRAQ 4plex (K N-term)
sp|P62736|ACTA_HUMAN	R.H(+144.10)QGVM(+15.99)VGMGQK(+144.10).D	N	51.11	1474.76	8	492.597	3	36.12	26620	7	42	52	iTRAQ 4plex (K N-term); Oxidation (M)
sp|P62736|ACTA_HUMAN	R.A(+144.10)VFPSIVGR.P	N	46.22	1088.64	7.9	545.334	2	94.64	55532	23	31	39	iTRAQ 4plex (K N-term)
sp|P62736|ACTA_HUMAN	K.E(+144.10)ITALAPSTM(+15.99)K(+144.10).I	N	44.73	1464.81	16	489.284	3	69.95	43313	3	318	328	iTRAQ 4plex (K N-term); Oxidation (M)
sp|P62736|ACTA_HUMAN	K.Y(+144.10)PIEHGIITNWDDM(+15.99)EK(+144.10).I	Y	42.85	2264.1	2	567.033	4	98.78	57581	9	71	86	iTRAQ 4plex (Y); Oxidation (M); iTRAQ 4plex (K N-term)
sp|P62736|ACTA_HUMAN	R.D(+144.10)LTDY(+144.10)LMK(+144.10).I	N	34.75	1429.78	14.8	477.607	3	86.49	51505	6	186	193	iTRAQ 4plex (K N-term); iTRAQ 4plex (Y)
sp|P62736|ACTA_HUMAN	K.I(+144.10)IAPPER.K	N	34.74	938.565	12.4	470.296	2	53.56	35215	25	331	337	iTRAQ 4plex (K N-term)
sp|P62736|ACTA_HUMAN	R.D(+144.10)LTDYLM(+15.99)K(+144.10).I	N	30.2	1301.67	-2.7	651.842	2	85.6	51068	11	186	193	iTRAQ 4plex (K N-term); Oxidation (M)
sp|P62736|ACTA_HUMAN	K.I(+144.10)IAPPERK(+144.10).Y	N	28.74	1210.76	21.1	404.603	3	51.37	34127	17	331	338	iTRAQ 4plex (K N-term)
sp|P62736|ACTA_HUMAN	K.IIAPPER.K	N	28.05	794.465	11.2	398.244	2	36.89	27009	1	331	337
sp|P62736|ACTA_HUMAN	R.L(+144.10)DLAGR.D	N	26.11	787.465	21.9	394.749	2	43.95	30473	21	180	185	iTRAQ 4plex (K N-term)
sp|P62736|ACTA_HUMAN	F.PSIVGRPR.H	N	24.74	880.524	19.4	441.278	2	88.75	52615	4	34	41
sp|P62736|ACTA_HUMAN	K.R(+144.10)GILTLK(+144.10).Y	N	24.63	1087.73	4.1	544.874	2	63.71	40222	18	64	70	iTRAQ 4plex (K N-term)
sp|P62736|ACTA_HUMAN	R.G(+144.10)ILTLK(+144.10).Y	N	22.17	931.627	17.3	466.829	2	77.09	46854	31	65	70	iTRAQ 4plex (K N-term)
tr|A6NL76|A6NL76_HUMAN	R.HQGVMVGMGQK(+144.10).D	N	74.32	1314.66	-10.3	658.332	2	43.29	30151	10	42	52	iTRAQ 4plex (K N-term)
tr|A6NL76|A6NL76_HUMAN	R.H(+144.10)QGVMVGMGQK(+144.10).D	N	70.04	1458.76	8.7	487.266	3	45.29	31137	18	42	52	iTRAQ 4plex (K N-term)
tr|A6NL76|A6NL76_HUMAN	R.A(+144.10)VFPSIVGRPR.H	N	66.69	1341.8	19.5	448.282	3	88.64	52561	26	31	41	iTRAQ 4plex (K N-term)
tr|A6NL76|A6NL76_HUMAN	K.A(+144.10)GFAGDDAPR.A	N	66.12	1119.54	-3.3	560.776	2	33.09	25122	20	21	30	iTRAQ 4plex (K N-term)
tr|A6NL76|A6NL76_HUMAN	K.Y(+144.10)PIEHGIITNWDDMEK(+144.10).I	Y	64.65	2248.1	-7.2	750.37	3	111.98	64097	11	71	86	iTRAQ 4plex (Y); iTRAQ 4plex (K N-term)
tr|A6NL76|A6NL76_HUMAN	K.E(+144.10)ITALAPSTMK(+144.10).I	N	63.77	1448.81	-6	725.409	2	85.52	51027	24	195	205	iTRAQ 4plex (K N-term)
tr|A6NL76|A6NL76_HUMAN	R.H(+144.10)QGVMVGM(+15.99)GQK(+144.10).D	N	56.4	1474.76	4.9	492.596	3	28.02	22627	10	42	52	iTRAQ 4plex (K N-term); Oxidation (M)
tr|A6NL76|A6NL76_HUMAN	K.I(+144.10)WHHTFYNELR.V	N	56.3	1658.84	-19.2	830.412	2	80.53	48554	14	87	97	iTRAQ 4plex (K N-term)
tr|A6NL76|A6NL76_HUMAN	K.D(+144.10)SYVGDEAQSK(+144.10).R	N	55.37	1485.71	5.9	496.248	3	31.09	24134	12	53	63	iTRAQ 4plex (K N-term)
tr|A6NL76|A6NL76_HUMAN	K.Y(+144.10)(+144.10)PIEHGIITNWDDMEK(+144.10).I	Y	51.7	2392.2	-9.1	798.401	3	99.98	58168	2	71	86	iTRAQ 4plex (K N-term); iTRAQ 4plex (Y)
tr|A6NL76|A6NL76_HUMAN	R.H(+144.10)QGVM(+15.99)VGMGQK(+144.10).D	N	51.11	1474.76	8	492.597	3	36.12	26620	7	42	52	iTRAQ 4plex (K N-term); Oxidation (M)
tr|A6NL76|A6NL76_HUMAN	R.A(+144.10)VFPSIVGR.P	N	46.22	1088.64	7.9	545.334	2	94.64	55532	23	31	39	iTRAQ 4plex (K N-term)
tr|A6NL76|A6NL76_HUMAN	K.E(+144.10)ITALAPSTM(+15.99)K(+144.10).I	N	44.73	1464.81	16	489.284	3	69.95	43313	3	195	205	iTRAQ 4plex (K N-term); Oxidation (M)
tr|A6NL76|A6NL76_HUMAN	K.Y(+144.10)PIEHGIITNWDDM(+15.99)EK(+144.10).I	Y	42.85	2264.1	2	567.033	4	98.78	57581	9	71	86	iTRAQ 4plex (Y); Oxidation (M); iTRAQ 4plex (K N-term)
tr|A6NL76|A6NL76_HUMAN	K.IWHHTFYNELR.V	N	42.7	1514.74	-15.2	758.367	2	67.58	42130	2	87	97
tr|A6NL76|A6NL76_HUMAN	K.I(+144.10)WHHTFY(+144.10)NELR.V	N	34.98	1802.94	-19.1	902.461	2	71.24	43956	11	87	97	iTRAQ 4plex (K N-term); iTRAQ 4plex (Y)
tr|A6NL76|A6NL76_HUMAN	K.I(+144.10)IAPPER.K	N	34.74	938.565	12.4	470.296	2	53.56	35215	25	208	214	iTRAQ 4plex (K N-term)
tr|A6NL76|A6NL76_HUMAN	K.I(+144.10)IAPPERK(+144.10).Y	N	28.74	1210.76	21.1	404.603	3	51.37	34127	17	208	215	iTRAQ 4plex (K N-term)
tr|A6NL76|A6NL76_HUMAN	K.IIAPPER.K	N	28.05	794.465	11.2	398.244	2	36.89	27009	1	208	214
tr|A6NL76|A6NL76_HUMAN	F.PSIVGRPR.H	N	24.74	880.524	19.4	441.278	2	88.75	52615	4	34	41
tr|A6NL76|A6NL76_HUMAN	K.R(+144.10)GILTLK(+144.10).Y	N	24.63	1087.73	4.1	544.874	2	63.71	40222	18	64	70	iTRAQ 4plex (K N-term)
tr|A6NL76|A6NL76_HUMAN	R.G(+144.10)ILTLK(+144.10).Y	N	22.17	931.627	17.3	466.829	2	77.09	46854	31	65	70	iTRAQ 4plex (K N-term)
tr|F8WB63|F8WB63_HUMAN	R.HQGVMVGMGQK(+144.10).D	N	74.32	1314.66	-10.3	658.332	2	43.29	30151	10	41	51	iTRAQ 4plex (K N-term)
tr|F8WB63|F8WB63_HUMAN	R.H(+144.10)QGVMVGMGQK(+144.10).D	N	70.04	1458.76	8.7	487.266	3	45.29	31137	18	41	51	iTRAQ 4plex (K N-term)
tr|F8WB63|F8WB63_HUMAN	R.A(+144.10)VFPSIVGRPR.H	N	66.69	1341.8	19.5	448.282	3	88.64	52561	26	30	40	iTRAQ 4plex (K N-term)
tr|F8WB63|F8WB63_HUMAN	K.A(+144.10)GFAGDDAPR.A	N	66.12	1119.54	-3.3	560.776	2	33.09	25122	20	20	29	iTRAQ 4plex (K N-term)
tr|F8WB63|F8WB63_HUMAN	K.Y(+144.10)PIEHGIITNWDDMEK(+144.10).P	Y	64.65	2248.1	-7.2	750.37	3	111.98	64097	11	70	85	iTRAQ 4plex (Y); iTRAQ 4plex (K N-term)
tr|F8WB63|F8WB63_HUMAN	R.H(+144.10)QGVMVGM(+15.99)GQK(+144.10).D	N	56.4	1474.76	4.9	492.596	3	28.02	22627	10	41	51	iTRAQ 4plex (K N-term); Oxidation (M)
tr|F8WB63|F8WB63_HUMAN	K.D(+144.10)SYVGDEAQSK(+144.10).R	N	55.37	1485.71	5.9	496.248	3	31.09	24134	12	52	62	iTRAQ 4plex (K N-term)
tr|F8WB63|F8WB63_HUMAN	K.Y(+144.10)(+144.10)PIEHGIITNWDDMEK(+144.10).P	Y	51.7	2392.2	-9.1	798.401	3	99.98	58168	2	70	85	iTRAQ 4plex (K N-term); iTRAQ 4plex (Y)
tr|F8WB63|F8WB63_HUMAN	R.H(+144.10)QGVM(+15.99)VGMGQK(+144.10).D	N	51.11	1474.76	8	492.597	3	36.12	26620	7	41	51	iTRAQ 4plex (K N-term); Oxidation (M)
tr|F8WB63|F8WB63_HUMAN	R.A(+144.10)VFPSIVGR.P	N	46.22	1088.64	7.9	545.334	2	94.64	55532	23	30	38	iTRAQ 4plex (K N-term)
tr|F8WB63|F8WB63_HUMAN	K.Y(+144.10)PIEHGIITNWDDM(+15.99)EK(+144.10).P	Y	42.85	2264.1	2	567.033	4	98.78	57581	9	70	85	iTRAQ 4plex (Y); Oxidation (M); iTRAQ 4plex (K N-term)
tr|F8WB63|F8WB63_HUMAN	F.PSIVGRPR.H	N	24.74	880.524	19.4	441.278	2	88.75	52615	4	33	40
tr|F8WB63|F8WB63_HUMAN	K.R(+144.10)GILTLK(+144.10).Y	N	24.63	1087.73	4.1	544.874	2	63.71	40222	18	63	69	iTRAQ 4plex (K N-term)
tr|F8WB63|F8WB63_HUMAN	R.G(+144.10)ILTLK(+144.10).Y	N	22.17	931.627	17.3	466.829	2	77.09	46854	31	64	69	iTRAQ 4plex (K N-term)
tr|F6UVQ4|F6UVQ4_HUMAN	R.HQGVMVGMGQK(+144.10).D	N	74.32	1314.66	-10.3	658.332	2	43.29	30151	10	42	52	iTRAQ 4plex (K N-term)
tr|F6UVQ4|F6UVQ4_HUMAN	R.H(+144.10)QGVMVGMGQK(+144.10).D	N	70.04	1458.76	8.7	487.266	3	45.29	31137	18	42	52	iTRAQ 4plex (K N-term)
tr|F6UVQ4|F6UVQ4_HUMAN	R.A(+144.10)VFPSIVGRPR.H	N	66.69	1341.8	19.5	448.282	3	88.64	52561	26	31	41	iTRAQ 4plex (K N-term)
tr|F6UVQ4|F6UVQ4_HUMAN	K.A(+144.10)GFAGDDAPR.A	N	66.12	1119.54	-3.3	560.776	2	33.09	25122	20	21	30	iTRAQ 4plex (K N-term)
tr|F6UVQ4|F6UVQ4_HUMAN	K.Y(+144.10)PIEHGIITNWDDMEK(+144.10).I	Y	64.65	2248.1	-7.2	750.37	3	111.98	64097	11	71	86	iTRAQ 4plex (Y); iTRAQ 4plex (K N-term)
tr|F6UVQ4|F6UVQ4_HUMAN	R.H(+144.10)QGVMVGM(+15.99)GQK(+144.10).D	N	56.4	1474.76	4.9	492.596	3	28.02	22627	10	42	52	iTRAQ 4plex (K N-term); Oxidation (M)
tr|F6UVQ4|F6UVQ4_HUMAN	K.D(+144.10)SYVGDEAQSK(+144.10).R	N	55.37	1485.71	5.9	496.248	3	31.09	24134	12	53	63	iTRAQ 4plex (K N-term)
tr|F6UVQ4|F6UVQ4_HUMAN	K.Y(+144.10)(+144.10)PIEHGIITNWDDMEK(+144.10).I	Y	51.7	2392.2	-9.1	798.401	3	99.98	58168	2	71	86	iTRAQ 4plex (K N-term); iTRAQ 4plex (Y)
tr|F6UVQ4|F6UVQ4_HUMAN	R.H(+144.10)QGVM(+15.99)VGMGQK(+144.10).D	N	51.11	1474.76	8	492.597	3	36.12	26620	7	42	52	iTRAQ 4plex (K N-term); Oxidation (M)
tr|F6UVQ4|F6UVQ4_HUMAN	R.A(+144.10)VFPSIVGR.P	N	46.22	1088.64	7.9	545.334	2	94.64	55532	23	31	39	iTRAQ 4plex (K N-term)
tr|F6UVQ4|F6UVQ4_HUMAN	K.Y(+144.10)PIEHGIITNWDDM(+15.99)EK(+144.10).I	Y	42.85	2264.1	2	567.033	4	98.78	57581	9	71	86	iTRAQ 4plex (Y); Oxidation (M); iTRAQ 4plex (K N-term)
tr|F6UVQ4|F6UVQ4_HUMAN	F.PSIVGRPR.H	N	24.74	880.524	19.4	441.278	2	88.75	52615	4	34	41
tr|F6UVQ4|F6UVQ4_HUMAN	K.R(+144.10)GILTLK(+144.10).Y	N	24.63	1087.73	4.1	544.874	2	63.71	40222	18	64	70	iTRAQ 4plex (K N-term)
tr|F6UVQ4|F6UVQ4_HUMAN	R.G(+144.10)ILTLK(+144.10).Y	N	22.17	931.627	17.3	466.829	2	77.09	46854	31	65	70	iTRAQ 4plex (K N-term)
tr|F6QUT6|F6QUT6_HUMAN	R.HQGVMVGMGQK(+144.10).D	N	74.32	1314.66	-10.3	658.332	2	43.29	30151	10	42	52	iTRAQ 4plex (K N-term)
tr|F6QUT6|F6QUT6_HUMAN	R.H(+144.10)QGVMVGMGQK(+144.10).D	N	70.04	1458.76	8.7	487.266	3	45.29	31137	18	42	52	iTRAQ 4plex (K N-term)
tr|F6QUT6|F6QUT6_HUMAN	R.A(+144.10)VFPSIVGRPR.H	N	66.69	1341.8	19.5	448.282	3	88.64	52561	26	31	41	iTRAQ 4plex (K N-term)
tr|F6QUT6|F6QUT6_HUMAN	K.A(+144.10)GFAGDDAPR.A	N	66.12	1119.54	-3.3	560.776	2	33.09	25122	20	21	30	iTRAQ 4plex (K N-term)
tr|F6QUT6|F6QUT6_HUMAN	K.Y(+144.10)PIEHGIITNWDDMEK(+144.10).I	Y	64.65	2248.1	-7.2	750.37	3	111.98	64097	11	71	86	iTRAQ 4plex (Y); iTRAQ 4plex (K N-term)
tr|F6QUT6|F6QUT6_HUMAN	R.H(+144.10)QGVMVGM(+15.99)GQK(+144.10).D	N	56.4	1474.76	4.9	492.596	3	28.02	22627	10	42	52	iTRAQ 4plex (K N-term); Oxidation (M)
tr|F6QUT6|F6QUT6_HUMAN	K.D(+144.10)SYVGDEAQSK(+144.10).R	N	55.37	1485.71	5.9	496.248	3	31.09	24134	12	53	63	iTRAQ 4plex (K N-term)
tr|F6QUT6|F6QUT6_HUMAN	K.Y(+144.10)(+144.10)PIEHGIITNWDDMEK(+144.10).I	Y	51.7	2392.2	-9.1	798.401	3	99.98	58168	2	71	86	iTRAQ 4plex (K N-term); iTRAQ 4plex (Y)
tr|F6QUT6|F6QUT6_HUMAN	R.H(+144.10)QGVM(+15.99)VGMGQK(+144.10).D	N	51.11	1474.76	8	492.597	3	36.12	26620	7	42	52	iTRAQ 4plex (K N-term); Oxidation (M)
tr|F6QUT6|F6QUT6_HUMAN	R.A(+144.10)VFPSIVGR.P	N	46.22	1088.64	7.9	545.334	2	94.64	55532	23	31	39	iTRAQ 4plex (K N-term)
tr|F6QUT6|F6QUT6_HUMAN	K.Y(+144.10)PIEHGIITNWDDM(+15.99)EK(+144.10).I	Y	42.85	2264.1	2	567.033	4	98.78	57581	9	71	86	iTRAQ 4plex (Y); Oxidation (M); iTRAQ 4plex (K N-term)
tr|F6QUT6|F6QUT6_HUMAN	F.PSIVGRPR.H	N	24.74	880.524	19.4	441.278	2	88.75	52615	4	34	41
tr|F6QUT6|F6QUT6_HUMAN	K.R(+144.10)GILTLK(+144.10).Y	N	24.63	1087.73	4.1	544.874	2	63.71	40222	18	64	70	iTRAQ 4plex (K N-term)
tr|F6QUT6|F6QUT6_HUMAN	R.G(+144.10)ILTLK(+144.10).Y	N	22.17	931.627	17.3	466.829	2	77.09	46854	31	65	70	iTRAQ 4plex (K N-term)
tr|B8ZZJ2|B8ZZJ2_HUMAN	R.HQGVMVGMGQK(+144.10).D	N	74.32	1314.66	-10.3	658.332	2	43.29	30151	10	41	51	iTRAQ 4plex (K N-term)
tr|B8ZZJ2|B8ZZJ2_HUMAN	R.H(+144.10)QGVMVGMGQK(+144.10).D	N	70.04	1458.76	8.7	487.266	3	45.29	31137	18	41	51	iTRAQ 4plex (K N-term)
tr|B8ZZJ2|B8ZZJ2_HUMAN	R.A(+144.10)VFPSIVGRPR.H	N	66.69	1341.8	19.5	448.282	3	88.64	52561	26	30	40	iTRAQ 4plex (K N-term)
tr|B8ZZJ2|B8ZZJ2_HUMAN	K.A(+144.10)GFAGDDAPR.A	N	66.12	1119.54	-3.3	560.776	2	33.09	25122	20	20	29	iTRAQ 4plex (K N-term)
tr|B8ZZJ2|B8ZZJ2_HUMAN	K.Y(+144.10)PIEHGIITNWDDMEK(+144.10).P	Y	64.65	2248.1	-7.2	750.37	3	111.98	64097	11	70	85	iTRAQ 4plex (Y); iTRAQ 4plex (K N-term)
tr|B8ZZJ2|B8ZZJ2_HUMAN	R.H(+144.10)QGVMVGM(+15.99)GQK(+144.10).D	N	56.4	1474.76	4.9	492.596	3	28.02	22627	10	41	51	iTRAQ 4plex (K N-term); Oxidation (M)
tr|B8ZZJ2|B8ZZJ2_HUMAN	K.D(+144.10)SYVGDEAQSK(+144.10).R	N	55.37	1485.71	5.9	496.248	3	31.09	24134	12	52	62	iTRAQ 4plex (K N-term)
tr|B8ZZJ2|B8ZZJ2_HUMAN	K.Y(+144.10)(+144.10)PIEHGIITNWDDMEK(+144.10).P	Y	51.7	2392.2	-9.1	798.401	3	99.98	58168	2	70	85	iTRAQ 4plex (K N-term); iTRAQ 4plex (Y)
tr|B8ZZJ2|B8ZZJ2_HUMAN	R.H(+144.10)QGVM(+15.99)VGMGQK(+144.10).D	N	51.11	1474.76	8	492.597	3	36.12	26620	7	41	51	iTRAQ 4plex (K N-term); Oxidation (M)
tr|B8ZZJ2|B8ZZJ2_HUMAN	R.A(+144.10)VFPSIVGR.P	N	46.22	1088.64	7.9	545.334	2	94.64	55532	23	30	38	iTRAQ 4plex (K N-term)
tr|B8ZZJ2|B8ZZJ2_HUMAN	K.Y(+144.10)PIEHGIITNWDDM(+15.99)EK(+144.10).P	Y	42.85	2264.1	2	567.033	4	98.78	57581	9	70	85	iTRAQ 4plex (Y); Oxidation (M); iTRAQ 4plex (K N-term)
tr|B8ZZJ2|B8ZZJ2_HUMAN	F.PSIVGRPR.H	N	24.74	880.524	19.4	441.278	2	88.75	52615	4	33	40
tr|B8ZZJ2|B8ZZJ2_HUMAN	K.R(+144.10)GILTLK(+144.10).Y	N	24.63	1087.73	4.1	544.874	2	63.71	40222	18	63	69	iTRAQ 4plex (K N-term)
tr|B8ZZJ2|B8ZZJ2_HUMAN	R.G(+144.10)ILTLK(+144.10).Y	N	22.17	931.627	17.3	466.829	2	77.09	46854	31	64	69	iTRAQ 4plex (K N-term)
tr|C9JFL5|C9JFL5_HUMAN	R.HQGVMVGMGQK(+144.10).D	N	74.32	1314.66	-10.3	658.332	2	43.29	30151	10	41	51	iTRAQ 4plex (K N-term)
tr|C9JFL5|C9JFL5_HUMAN	R.H(+144.10)QGVMVGMGQK(+144.10).D	N	70.04	1458.76	8.7	487.266	3	45.29	31137	18	41	51	iTRAQ 4plex (K N-term)
tr|C9JFL5|C9JFL5_HUMAN	R.A(+144.10)VFPSIVGRPR.H	N	66.69	1341.8	19.5	448.282	3	88.64	52561	26	30	40	iTRAQ 4plex (K N-term)
tr|C9JFL5|C9JFL5_HUMAN	K.A(+144.10)GFAGDDAPR.A	N	66.12	1119.54	-3.3	560.776	2	33.09	25122	20	20	29	iTRAQ 4plex (K N-term)
tr|C9JFL5|C9JFL5_HUMAN	K.Y(+144.10)PIEHGIITNWDDMEK(+144.10).I	Y	64.65	2248.1	-7.2	750.37	3	111.98	64097	11	70	85	iTRAQ 4plex (Y); iTRAQ 4plex (K N-term)
tr|C9JFL5|C9JFL5_HUMAN	R.H(+144.10)QGVMVGM(+15.99)GQK(+144.10).D	N	56.4	1474.76	4.9	492.596	3	28.02	22627	10	41	51	iTRAQ 4plex (K N-term); Oxidation (M)
tr|C9JFL5|C9JFL5_HUMAN	K.D(+144.10)SYVGDEAQSK(+144.10).R	N	55.37	1485.71	5.9	496.248	3	31.09	24134	12	52	62	iTRAQ 4plex (K N-term)
tr|C9JFL5|C9JFL5_HUMAN	K.Y(+144.10)(+144.10)PIEHGIITNWDDMEK(+144.10).I	Y	51.7	2392.2	-9.1	798.401	3	99.98	58168	2	70	85	iTRAQ 4plex (K N-term); iTRAQ 4plex (Y)
tr|C9JFL5|C9JFL5_HUMAN	R.H(+144.10)QGVM(+15.99)VGMGQK(+144.10).D	N	51.11	1474.76	8	492.597	3	36.12	26620	7	41	51	iTRAQ 4plex (K N-term); Oxidation (M)
tr|C9JFL5|C9JFL5_HUMAN	R.A(+144.10)VFPSIVGR.P	N	46.22	1088.64	7.9	545.334	2	94.64	55532	23	30	38	iTRAQ 4plex (K N-term)
tr|C9JFL5|C9JFL5_HUMAN	K.Y(+144.10)PIEHGIITNWDDM(+15.99)EK(+144.10).I	Y	42.85	2264.1	2	567.033	4	98.78	57581	9	70	85	iTRAQ 4plex (Y); Oxidation (M); iTRAQ 4plex (K N-term)
tr|C9JFL5|C9JFL5_HUMAN	F.PSIVGRPR.H	N	24.74	880.524	19.4	441.278	2	88.75	52615	4	33	40
tr|C9JFL5|C9JFL5_HUMAN	K.R(+144.10)GILTLK(+144.10).Y	N	24.63	1087.73	4.1	544.874	2	63.71	40222	18	63	69	iTRAQ 4plex (K N-term)
tr|C9JFL5|C9JFL5_HUMAN	R.G(+144.10)ILTLK(+144.10).Y	N	22.17	931.627	17.3	466.829	2	77.09	46854	31	64	69	iTRAQ 4plex (K N-term)
sp|P02545|LMNA_HUMAN	R.N(+144.10)SNLVGAAHEELQQSR.I	Y	83.2	1895.96	-6	632.989	3	64.41	40568	5	281	296	iTRAQ 4plex (K N-term)
sp|P02545|LMNA_HUMAN	R.S(+144.10)GAQASSTPLSPTR.I	Y	60.61	1502.78	3	501.935	3	37.39	27257	6	12	25	iTRAQ 4plex (K N-term)
sp|P02545|LMNA_HUMAN	R.T(+144.10)LEGELHDLR.G	Y	57.81	1325.7	18.4	442.917	3	75.18	45896	11	157	166	iTRAQ 4plex (K N-term)
sp|P02545|LMNA_HUMAN	K.E(+144.10)GDLIAAQAR.L	Y	56.71	1186.64	-7.5	594.323	2	52	34441	9	124	133	iTRAQ 4plex (K N-term)
sp|P02545|LMNA_HUMAN	R.I(+144.10)DSLSAQLSQLQK(+144.10).Q	Y	53.98	1717.98	-14.8	859.983	2	110.69	63459	4	299	311	iTRAQ 4plex (K N-term)
sp|P02545|LMNA_HUMAN	K.E(+144.10)AALSTALSEK(+144.10).R	Y	52.92	1406.78	-7.4	704.393	2	73.37	45012	7	145	155	iTRAQ 4plex (K N-term)
sp|P02545|LMNA_HUMAN	R.V(+144.10)AVEEVDEEGK(+144.10)FVR.L	Y	48.21	1893	13.5	474.265	4	84.02	50283	7	440	453	iTRAQ 4plex (K N-term)
sp|P02545|LMNA_HUMAN	R.S(+144.10)LETENAGLR.L	Y	47.67	1232.65	-7.3	617.326	2	43.33	30172	11	51	60	iTRAQ 4plex (K N-term)
sp|P02545|LMNA_HUMAN	R.L(+144.10)SPSPTSQR.S	Y	47.12	1115.6	-4.1	558.807	2	28.49	22856	6	389	397	iTRAQ 4plex (K N-term)
sp|P02545|LMNA_HUMAN	K.N(+144.10)IYSEELR.E	Y	46.66	1166.6	-1.5	584.308	2	53.84	35351	4	209	216	iTRAQ 4plex (K N-term)
sp|P02545|LMNA_HUMAN	K.L(+144.10)RDLEDSLAR.E	Y	43.42	1330.73	-6	666.369	2	78.35	47475	11	320	329	iTRAQ 4plex (K N-term)
sp|P02545|LMNA_HUMAN	K.A(+144.10)AYEAELGDAR.K	Y	42.31	1308.64	-10.5	655.321	2	52.57	34726	1	79	89	iTRAQ 4plex (K N-term)
sp|P02545|LMNA_HUMAN	R.L(+144.10)ADALQELR.A	Y	41.95	1171.67	4.4	586.843	2	101.71	59023	3	241	249	iTRAQ 4plex (K N-term)
sp|P02545|LMNA_HUMAN	K.L(+144.10)EAALGEAK(+144.10).K	Y	41.71	1188.69	-10.2	595.347	2	68.59	42631	2	172	180	iTRAQ 4plex (K N-term)
sp|P02545|LMNA_HUMAN	R.I(+144.10)TESEEVVSR.E	Y	38.6	1291.67	-7.6	646.838	2	48.75	32835	1	63	72	iTRAQ 4plex (K N-term)
sp|P02545|LMNA_HUMAN	R.L(+144.10)AVYIDR.V	Y	36.35	992.576	7.4	497.299	2	76.17	46389	10	42	48	iTRAQ 4plex (K N-term)
sp|P02545|LMNA_HUMAN	K.L(+144.10)LEGEEER.L	Y	33.31	1117.57	-4.1	559.791	2	40.27	28666	5	379	386	iTRAQ 4plex (K N-term)
sp|P02545|LMNA_HUMAN	R.T(+144.10)ALINSTGEEVAMR.K	Y	30.27	1634.84	-17.1	818.413	2	80.09	48334	2	528	541	iTRAQ 4plex (K N-term)
sp|P02545|LMNA_HUMAN	R.L(+144.10)QLELSK(+144.10).V	Y	29.01	1117.69	7.2	559.857	2	85.89	51210	7	102	108	iTRAQ 4plex (K N-term)
sp|P02545|LMNA_HUMAN	K.ASASGSGAQ(+.98)VGGPISSGSSASSVTVTR.S	Y	27.87	2365.14	6.7	789.391	3	65.51	41107	4	598	624	Deamidation (NQ)
sp|P02545|LMNA_HUMAN	K.T(+144.10)LDSVAK(+144.10).E	Y	27.04	1020.6	4.2	511.31	2	39.15	28116	6	91	97	iTRAQ 4plex (K N-term)
tr|Q3BDU5|Q3BDU5_HUMAN	R.N(+144.10)SNLVGAAHEELQQSR.I	Y	83.2	1895.96	-6	632.989	3	64.41	40568	5	281	296	iTRAQ 4plex (K N-term)
tr|Q3BDU5|Q3BDU5_HUMAN	R.S(+144.10)GAQASSTPLSPTR.I	Y	60.61	1502.78	3	501.935	3	37.39	27257	6	12	25	iTRAQ 4plex (K N-term)
tr|Q3BDU5|Q3BDU5_HUMAN	R.T(+144.10)LEGELHDLR.G	Y	57.81	1325.7	18.4	442.917	3	75.18	45896	11	157	166	iTRAQ 4plex (K N-term)
tr|Q3BDU5|Q3BDU5_HUMAN	K.E(+144.10)GDLIAAQAR.L	Y	56.71	1186.64	-7.5	594.323	2	52	34441	9	124	133	iTRAQ 4plex (K N-term)
tr|Q3BDU5|Q3BDU5_HUMAN	R.I(+144.10)DSLSAQLSQLQK(+144.10).Q	Y	53.98	1717.98	-14.8	859.983	2	110.69	63459	4	299	311	iTRAQ 4plex (K N-term)
tr|Q3BDU5|Q3BDU5_HUMAN	K.E(+144.10)AALSTALSEK(+144.10).R	Y	52.92	1406.78	-7.4	704.393	2	73.37	45012	7	145	155	iTRAQ 4plex (K N-term)
tr|Q3BDU5|Q3BDU5_HUMAN	R.S(+144.10)LETENAGLR.L	Y	47.67	1232.65	-7.3	617.326	2	43.33	30172	11	51	60	iTRAQ 4plex (K N-term)
tr|Q3BDU5|Q3BDU5_HUMAN	R.L(+144.10)SPSPTSQR.S	Y	47.12	1115.6	-4.1	558.807	2	28.49	22856	6	389	397	iTRAQ 4plex (K N-term)
tr|Q3BDU5|Q3BDU5_HUMAN	K.N(+144.10)IYSEELR.E	Y	46.66	1166.6	-1.5	584.308	2	53.84	35351	4	209	216	iTRAQ 4plex (K N-term)
tr|Q3BDU5|Q3BDU5_HUMAN	K.L(+144.10)RDLEDSLAR.E	Y	43.42	1330.73	-6	666.369	2	78.35	47475	11	320	329	iTRAQ 4plex (K N-term)
tr|Q3BDU5|Q3BDU5_HUMAN	K.A(+144.10)AYEAELGDAR.K	Y	42.31	1308.64	-10.5	655.321	2	52.57	34726	1	79	89	iTRAQ 4plex (K N-term)
tr|Q3BDU5|Q3BDU5_HUMAN	R.L(+144.10)ADALQELR.A	Y	41.95	1171.67	4.4	586.843	2	101.71	59023	3	241	249	iTRAQ 4plex (K N-term)
tr|Q3BDU5|Q3BDU5_HUMAN	K.L(+144.10)EAALGEAK(+144.10).K	Y	41.71	1188.69	-10.2	595.347	2	68.59	42631	2	172	180	iTRAQ 4plex (K N-term)
tr|Q3BDU5|Q3BDU5_HUMAN	R.I(+144.10)TESEEVVSR.E	Y	38.6	1291.67	-7.6	646.838	2	48.75	32835	1	63	72	iTRAQ 4plex (K N-term)
tr|Q3BDU5|Q3BDU5_HUMAN	R.L(+144.10)AVYIDR.V	Y	36.35	992.576	7.4	497.299	2	76.17	46389	10	42	48	iTRAQ 4plex (K N-term)
tr|Q3BDU5|Q3BDU5_HUMAN	K.L(+144.10)LEGEEER.L	Y	33.31	1117.57	-4.1	559.791	2	40.27	28666	5	379	386	iTRAQ 4plex (K N-term)
tr|Q3BDU5|Q3BDU5_HUMAN	R.T(+144.10)ALINSTGEEVAMR.K	Y	30.27	1634.84	-17.1	818.413	2	80.09	48334	2	443	456	iTRAQ 4plex (K N-term)
tr|Q3BDU5|Q3BDU5_HUMAN	R.L(+144.10)QLELSK(+144.10).V	Y	29.01	1117.69	7.2	559.857	2	85.89	51210	7	102	108	iTRAQ 4plex (K N-term)
tr|Q3BDU5|Q3BDU5_HUMAN	K.T(+144.10)LDSVAK(+144.10).E	Y	27.04	1020.6	4.2	511.31	2	39.15	28116	6	91	97	iTRAQ 4plex (K N-term)
tr|Q5TCI8|Q5TCI8_HUMAN	R.N(+144.10)SNLVGAAHEELQQSR.I	Y	83.2	1895.96	-6	632.989	3	64.41	40568	5	200	215	iTRAQ 4plex (K N-term)
tr|Q5TCI8|Q5TCI8_HUMAN	R.T(+144.10)LEGELHDLR.G	Y	57.81	1325.7	18.4	442.917	3	75.18	45896	11	76	85	iTRAQ 4plex (K N-term)
tr|Q5TCI8|Q5TCI8_HUMAN	K.E(+144.10)GDLIAAQAR.L	Y	56.71	1186.64	-7.5	594.323	2	52	34441	9	43	52	iTRAQ 4plex (K N-term)
tr|Q5TCI8|Q5TCI8_HUMAN	R.I(+144.10)DSLSAQLSQLQK(+144.10).Q	Y	53.98	1717.98	-14.8	859.983	2	110.69	63459	4	218	230	iTRAQ 4plex (K N-term)
tr|Q5TCI8|Q5TCI8_HUMAN	K.E(+144.10)AALSTALSEK(+144.10).R	Y	52.92	1406.78	-7.4	704.393	2	73.37	45012	7	64	74	iTRAQ 4plex (K N-term)
tr|Q5TCI8|Q5TCI8_HUMAN	R.V(+144.10)AVEEVDEEGK(+144.10)FVR.L	Y	48.21	1893	13.5	474.265	4	84.02	50283	7	359	372	iTRAQ 4plex (K N-term)
tr|Q5TCI8|Q5TCI8_HUMAN	R.L(+144.10)SPSPTSQR.S	Y	47.12	1115.6	-4.1	558.807	2	28.49	22856	6	308	316	iTRAQ 4plex (K N-term)
tr|Q5TCI8|Q5TCI8_HUMAN	K.N(+144.10)IYSEELR.E	Y	46.66	1166.6	-1.5	584.308	2	53.84	35351	4	128	135	iTRAQ 4plex (K N-term)
tr|Q5TCI8|Q5TCI8_HUMAN	K.L(+144.10)RDLEDSLAR.E	Y	43.42	1330.73	-6	666.369	2	78.35	47475	11	239	248	iTRAQ 4plex (K N-term)
tr|Q5TCI8|Q5TCI8_HUMAN	R.L(+144.10)ADALQELR.A	Y	41.95	1171.67	4.4	586.843	2	101.71	59023	3	160	168	iTRAQ 4plex (K N-term)
tr|Q5TCI8|Q5TCI8_HUMAN	K.L(+144.10)EAALGEAK(+144.10).K	Y	41.71	1188.69	-10.2	595.347	2	68.59	42631	2	91	99	iTRAQ 4plex (K N-term)
tr|Q5TCI8|Q5TCI8_HUMAN	K.L(+144.10)LEGEEER.L	Y	33.31	1117.57	-4.1	559.791	2	40.27	28666	5	298	305	iTRAQ 4plex (K N-term)
tr|Q5TCI8|Q5TCI8_HUMAN	R.T(+144.10)ALINSTGEEVAMR.K	Y	30.27	1634.84	-17.1	818.413	2	80.09	48334	2	447	460	iTRAQ 4plex (K N-term)
tr|H0YAB0|H0YAB0_HUMAN	R.T(+144.10)LEGELHDLR.G	Y	57.81	1325.7	18.4	442.917	3	75.18	45896	11	74	83	iTRAQ 4plex (K N-term)
tr|H0YAB0|H0YAB0_HUMAN	K.E(+144.10)GDLIAAQAR.L	Y	56.71	1186.64	-7.5	594.323	2	52	34441	9	41	50	iTRAQ 4plex (K N-term)
tr|H0YAB0|H0YAB0_HUMAN	K.E(+144.10)AALSTALSEK(+144.10).R	Y	52.92	1406.78	-7.4	704.393	2	73.37	45012	7	62	72	iTRAQ 4plex (K N-term)
tr|H0YAB0|H0YAB0_HUMAN	K.N(+144.10)IYSEELR.E	Y	46.66	1166.6	-1.5	584.308	2	53.84	35351	4	126	133	iTRAQ 4plex (K N-term)
tr|H0YAB0|H0YAB0_HUMAN	R.L(+144.10)ADALQELR.A	Y	41.95	1171.67	4.4	586.843	2	101.71	59023	3	158	166	iTRAQ 4plex (K N-term)
tr|H0YAB0|H0YAB0_HUMAN	K.L(+144.10)EAALGEAK(+144.10).K	Y	41.71	1188.69	-10.2	595.347	2	68.59	42631	2	89	97	iTRAQ 4plex (K N-term)
tr|A0A0C4DGC5|A0A0C4DGC5_HUMAN	R.V(+144.10)AVEEVDEEGK(+144.10)FVR.L	Y	48.21	1893	13.5	474.265	4	84.02	50283	7	66	79	iTRAQ 4plex (K N-term)
tr|A0A0C4DGC5|A0A0C4DGC5_HUMAN	R.L(+144.10)SPSPTSQR.S	Y	47.12	1115.6	-4.1	558.807	2	28.49	22856	6	15	23	iTRAQ 4plex (K N-term)
tr|A0A0C4DGC5|A0A0C4DGC5_HUMAN	K.L(+144.10)LEGEEER.L	Y	33.31	1117.57	-4.1	559.791	2	40.27	28666	5	5	12	iTRAQ 4plex (K N-term)
tr|A0A0C4DGC5|A0A0C4DGC5_HUMAN	K.ASASGSGAQ(+.98)VGGPISSGSSASSVTVTR.S	Y	27.87	2365.14	6.7	789.391	3	65.51	41107	4	194	220	Deamidation (NQ)
sp|Q03252|LMNB2_HUMAN	K.L(+144.10)LEGEEER.L	Y	33.31	1117.57	-4.1	559.791	2	40.27	28666	5	394	401	iTRAQ 4plex (K N-term)
tr|J9JID7|J9JID7_HUMAN	K.L(+144.10)LEGEEER.L	Y	33.31	1117.57	-4.1	559.791	2	40.27	28666	5	394	401	iTRAQ 4plex (K N-term)
tr|E9PBF6|E9PBF6_HUMAN	K.L(+144.10)LEGEEER	Y	33.31	1117.57	-4.1	559.791	2	40.27	28666	5	380	387	iTRAQ 4plex (K N-term)
sp|P20700|LMNB1_HUMAN	K.L(+144.10)LEGEEER.L	Y	33.31	1117.57	-4.1	559.791	2	40.27	28666	5	380	387	iTRAQ 4plex (K N-term)
tr|B7ZL25|B7ZL25_HUMAN	S.L(+144.10)QLELSK(+144.10).L	Y	29.01	1117.69	7.2	559.857	2	85.89	51210	7	1032	1038	iTRAQ 4plex (K N-term)
tr|A0A0A0MTG1|A0A0A0MTG1_HUMAN	S.L(+144.10)QLELSK(+144.10).L	Y	29.01	1117.69	7.2	559.857	2	85.89	51210	7	1032	1038	iTRAQ 4plex (K N-term)
tr|A0A140TA40|A0A140TA40_HUMAN	S.L(+144.10)QLELSK(+144.10).L	Y	29.01	1117.69	7.2	559.857	2	85.89	51210	7	1032	1038	iTRAQ 4plex (K N-term)
tr|A0A140TA45|A0A140TA45_HUMAN	S.L(+144.10)QLELSK(+144.10).L	Y	29.01	1117.69	7.2	559.857	2	85.89	51210	7	1032	1038	iTRAQ 4plex (K N-term)
sp|Q5ST30|SYVM_HUMAN	S.L(+144.10)QLELSK(+144.10).L	Y	29.01	1117.69	7.2	559.857	2	85.89	51210	7	1034	1040	iTRAQ 4plex (K N-term)
tr|A0A140T8Y0|A0A140T8Y0_HUMAN	S.L(+144.10)QLELSK(+144.10).L	Y	29.01	1117.69	7.2	559.857	2	85.89	51210	7	1034	1040	iTRAQ 4plex (K N-term)
tr|B4E0K6|B4E0K6_HUMAN	S.L(+144.10)QLELSK(+144.10).L	Y	29.01	1117.69	7.2	559.857	2	85.89	51210	7	1034	1040	iTRAQ 4plex (K N-term)
tr|A0A0G2JIA5|A0A0G2JIA5_HUMAN	S.L(+144.10)QLELSK(+144.10).L	Y	29.01	1117.69	7.2	559.857	2	85.89	51210	7	1034	1040	iTRAQ 4plex (K N-term)
tr|A0A0G2JL52|A0A0G2JL52_HUMAN	S.L(+144.10)QLELSK(+144.10).L	Y	29.01	1117.69	7.2	559.857	2	85.89	51210	7	1064	1070	iTRAQ 4plex (K N-term)
tr|A0A140TA35|A0A140TA35_HUMAN	S.L(+144.10)QLELSK(+144.10).L	Y	29.01	1117.69	7.2	559.857	2	85.89	51210	7	1064	1070	iTRAQ 4plex (K N-term)
tr|A0A140TA36|A0A140TA36_HUMAN	S.L(+144.10)QLELSK(+144.10).L	Y	29.01	1117.69	7.2	559.857	2	85.89	51210	7	1064	1070	iTRAQ 4plex (K N-term)
tr|Q5JP53|Q5JP53_HUMAN	R.I(+144.10)SVYYNEATGGK(+144.10).Y	Y	72.29	1588.83	-17.3	795.409	2	75.41	46013	9	29	40	iTRAQ 4plex (K N-term)
tr|Q5JP53|Q5JP53_HUMAN	R.L(+144.10)HFFMPGFAPLTSR.G	Y	69.38	1763.93	5.4	588.986	3	155.56	85784	8	245	258	iTRAQ 4plex (K N-term)
tr|Q5JP53|Q5JP53_HUMAN	K.G(+144.10)HYTEGAELVDSVLDVVR.K	Y	67.93	2102.07	-7.2	701.694	3	152.07	84057	1	86	103	iTRAQ 4plex (K N-term)
tr|Q5JP53|Q5JP53_HUMAN	R.A(+144.10)LTVPELTQQVFDAK(+144.10).N	Y	66.41	1947.09	-0.4	650.036	3	141.55	78832	10	265	279	iTRAQ 4plex (K N-term)
tr|Q5JP53|Q5JP53_HUMAN	K.M(+144.10)AVTFIGNSTAIQELFK(+144.10).R	Y	66.12	2157.17	-6	720.06	3	168.76	92285	9	345	361	iTRAQ 4plex (K N-term)
tr|Q5JP53|Q5JP53_HUMAN	R.A(+144.10)ILVDLEPGTMDSVR.S	Y	62.38	1758.93	4	587.319	3	125.6	70877	1	45	59	iTRAQ 4plex (K N-term)
tr|Q5JP53|Q5JP53_HUMAN	R.IMNTFSVVPSPK(+144.10).V	Y	58.69	1462.8	-8.8	732.399	2	99.26	57816	4	145	156	iTRAQ 4plex (K N-term)
tr|Q5JP53|Q5JP53_HUMAN	K.E(+144.10)VDEQMLNVQNK(+144.10).N	Y	56.73	1733.88	0.6	578.968	3	71.07	43873	7	307	318	iTRAQ 4plex (K N-term)
tr|Q5JP53|Q5JP53_HUMAN	R.I(+144.10)SEQFTAMFR.R	Y	55.47	1372.69	-3.4	687.351	2	118.22	67199	6	363	372	iTRAQ 4plex (K N-term)
tr|Q5JP53|Q5JP53_HUMAN	K.L(+144.10)AVNMVPFPR.L	Y	53.91	1286.73	-2.4	644.369	2	125.14	70652	3	235	244	iTRAQ 4plex (K N-term)
tr|Q5JP53|Q5JP53_HUMAN	R.F(+144.10)PGQLNADLR.K	Y	45.93	1273.69	-2.2	637.85	2	89.03	52754	18	224	233	iTRAQ 4plex (K N-term)
tr|Q5JP53|Q5JP53_HUMAN	R.F(+144.10)PGQLNADLRK(+144.10).L	Y	37.11	1545.88	7.6	516.306	3	84.45	50498	3	224	234	iTRAQ 4plex (K N-term)
tr|Q5JP53|Q5JP53_HUMAN	R.S(+144.10)GPFGQIFRPDNFVFGQSGAGNNWAK(+144.10).G	Y	36.58	3085.54	-17	772.378	4	155.59	85797	1	60	85	iTRAQ 4plex (K N-term)
tr|Q5JP53|Q5JP53_HUMAN	K.M(+144.10)AVTFIGN(+.98)STAIQELFK(+144.10).R	Y	32.82	2158.15	-6.1	720.388	3	169.7	92744	1	345	361	iTRAQ 4plex (K N-term); Deamidation (NQ)
tr|Q5JP53|Q5JP53_HUMAN	K.I(+144.10)REEYPDR.I	Y	31.29	1220.62	21.2	407.891	3	31.2	24188	3	137	144	iTRAQ 4plex (K N-term)
tr|Q5JP53|Q5JP53_HUMAN	R.Y(+144.10)LTVAAVFR.G	Y	27.83	1182.69	0.7	592.351	2	92.94	54687	5	292	300	iTRAQ 4plex (Y)
tr|Q5JP53|Q5JP53_HUMAN	R.L(+144.10)HFFMPGFAPL.T	Y	27.74	1419.75	-2.8	710.879	2	172.17	93967	2	245	255	iTRAQ 4plex (K N-term)
tr|Q5JP53|Q5JP53_HUMAN	R.G(+144.10)SQQYR.A	Y	25.92	881.446	13.9	441.736	2	4.23	10552	2	259	264	iTRAQ 4plex (K N-term)
sp|P07437|TBB5_HUMAN	R.I(+144.10)SVYYNEATGGK(+144.10).Y	Y	72.29	1588.83	-17.3	795.409	2	75.41	46013	9	47	58	iTRAQ 4plex (K N-term)
sp|P07437|TBB5_HUMAN	R.L(+144.10)HFFMPGFAPLTSR.G	Y	69.38	1763.93	5.4	588.986	3	155.56	85784	8	263	276	iTRAQ 4plex (K N-term)
sp|P07437|TBB5_HUMAN	K.G(+144.10)HYTEGAELVDSVLDVVR.K	Y	67.93	2102.07	-7.2	701.694	3	152.07	84057	1	104	121	iTRAQ 4plex (K N-term)
sp|P07437|TBB5_HUMAN	R.A(+144.10)LTVPELTQQVFDAK(+144.10).N	Y	66.41	1947.09	-0.4	650.036	3	141.55	78832	10	283	297	iTRAQ 4plex (K N-term)
sp|P07437|TBB5_HUMAN	K.M(+144.10)AVTFIGNSTAIQELFK(+144.10).R	Y	66.12	2157.17	-6	720.06	3	168.76	92285	9	363	379	iTRAQ 4plex (K N-term)
sp|P07437|TBB5_HUMAN	R.A(+144.10)ILVDLEPGTMDSVR.S	Y	62.38	1758.93	4	587.319	3	125.6	70877	1	63	77	iTRAQ 4plex (K N-term)
sp|P07437|TBB5_HUMAN	R.IMNTFSVVPSPK(+144.10).V	Y	58.69	1462.8	-8.8	732.399	2	99.26	57816	4	163	174	iTRAQ 4plex (K N-term)
sp|P07437|TBB5_HUMAN	K.E(+144.10)VDEQMLNVQNK(+144.10).N	Y	56.73	1733.88	0.6	578.968	3	71.07	43873	7	325	336	iTRAQ 4plex (K N-term)
sp|P07437|TBB5_HUMAN	R.I(+144.10)SEQFTAMFR.R	Y	55.47	1372.69	-3.4	687.351	2	118.22	67199	6	381	390	iTRAQ 4plex (K N-term)
sp|P07437|TBB5_HUMAN	K.L(+144.10)AVNMVPFPR.L	Y	53.91	1286.73	-2.4	644.369	2	125.14	70652	3	253	262	iTRAQ 4plex (K N-term)
sp|P07437|TBB5_HUMAN	R.F(+144.10)PGQLNADLR.K	Y	45.93	1273.69	-2.2	637.85	2	89.03	52754	18	242	251	iTRAQ 4plex (K N-term)
sp|P07437|TBB5_HUMAN	R.F(+144.10)PGQLNADLRK(+144.10).L	Y	37.11	1545.88	7.6	516.306	3	84.45	50498	3	242	252	iTRAQ 4plex (K N-term)
sp|P07437|TBB5_HUMAN	R.S(+144.10)GPFGQIFRPDNFVFGQSGAGNNWAK(+144.10).G	Y	36.58	3085.54	-17	772.378	4	155.59	85797	1	78	103	iTRAQ 4plex (K N-term)
sp|P07437|TBB5_HUMAN	K.M(+144.10)AVTFIGN(+.98)STAIQELFK(+144.10).R	Y	32.82	2158.15	-6.1	720.388	3	169.7	92744	1	363	379	iTRAQ 4plex (K N-term); Deamidation (NQ)
sp|P07437|TBB5_HUMAN	K.I(+144.10)REEYPDR.I	Y	31.29	1220.62	21.2	407.891	3	31.2	24188	3	155	162	iTRAQ 4plex (K N-term)
sp|P07437|TBB5_HUMAN	R.Y(+144.10)LTVAAVFR.G	Y	27.83	1182.69	0.7	592.351	2	92.94	54687	5	310	318	iTRAQ 4plex (Y)
sp|P07437|TBB5_HUMAN	R.L(+144.10)HFFMPGFAPL.T	Y	27.74	1419.75	-2.8	710.879	2	172.17	93967	2	263	273	iTRAQ 4plex (K N-term)
sp|P07437|TBB5_HUMAN	R.G(+144.10)SQQYR.A	Y	25.92	881.446	13.9	441.736	2	4.23	10552	2	277	282	iTRAQ 4plex (K N-term)
tr|Q5ST81|Q5ST81_HUMAN	R.L(+144.10)HFFMPGFAPLTSR.G	Y	69.38	1763.93	5.4	588.986	3	155.56	85784	8	191	204	iTRAQ 4plex (K N-term)
tr|Q5ST81|Q5ST81_HUMAN	K.G(+144.10)HYTEGAELVDSVLDVVR.K	Y	67.93	2102.07	-7.2	701.694	3	152.07	84057	1	32	49	iTRAQ 4plex (K N-term)
tr|Q5ST81|Q5ST81_HUMAN	R.A(+144.10)LTVPELTQQVFDAK(+144.10).N	Y	66.41	1947.09	-0.4	650.036	3	141.55	78832	10	211	225	iTRAQ 4plex (K N-term)
tr|Q5ST81|Q5ST81_HUMAN	K.M(+144.10)AVTFIGNSTAIQELFK(+144.10).R	Y	66.12	2157.17	-6	720.06	3	168.76	92285	9	291	307	iTRAQ 4plex (K N-term)
tr|Q5ST81|Q5ST81_HUMAN	R.IMNTFSVVPSPK(+144.10).V	Y	58.69	1462.8	-8.8	732.399	2	99.26	57816	4	91	102	iTRAQ 4plex (K N-term)
tr|Q5ST81|Q5ST81_HUMAN	K.E(+144.10)VDEQMLNVQNK(+144.10).N	Y	56.73	1733.88	0.6	578.968	3	71.07	43873	7	253	264	iTRAQ 4plex (K N-term)
tr|Q5ST81|Q5ST81_HUMAN	R.I(+144.10)SEQFTAMFR.R	Y	55.47	1372.69	-3.4	687.351	2	118.22	67199	6	309	318	iTRAQ 4plex (K N-term)
tr|Q5ST81|Q5ST81_HUMAN	K.L(+144.10)AVNMVPFPR.L	Y	53.91	1286.73	-2.4	644.369	2	125.14	70652	3	181	190	iTRAQ 4plex (K N-term)
tr|Q5ST81|Q5ST81_HUMAN	R.F(+144.10)PGQLNADLR.K	Y	45.93	1273.69	-2.2	637.85	2	89.03	52754	18	170	179	iTRAQ 4plex (K N-term)
tr|Q5ST81|Q5ST81_HUMAN	R.F(+144.10)PGQLNADLRK(+144.10).L	Y	37.11	1545.88	7.6	516.306	3	84.45	50498	3	170	180	iTRAQ 4plex (K N-term)
tr|Q5ST81|Q5ST81_HUMAN	R.S(+144.10)GPFGQIFRPDNFVFGQSGAGNNWAK(+144.10).G	Y	36.58	3085.54	-17	772.378	4	155.59	85797	1	6	31	iTRAQ 4plex (K N-term)
tr|Q5ST81|Q5ST81_HUMAN	K.M(+144.10)AVTFIGN(+.98)STAIQELFK(+144.10).R	Y	32.82	2158.15	-6.1	720.388	3	169.7	92744	1	291	307	iTRAQ 4plex (K N-term); Deamidation (NQ)
tr|Q5ST81|Q5ST81_HUMAN	K.I(+144.10)REEYPDR.I	Y	31.29	1220.62	21.2	407.891	3	31.2	24188	3	83	90	iTRAQ 4plex (K N-term)
tr|Q5ST81|Q5ST81_HUMAN	R.Y(+144.10)LTVAAVFR.G	Y	27.83	1182.69	0.7	592.351	2	92.94	54687	5	238	246	iTRAQ 4plex (Y)
tr|Q5ST81|Q5ST81_HUMAN	R.L(+144.10)HFFMPGFAPL.T	Y	27.74	1419.75	-2.8	710.879	2	172.17	93967	2	191	201	iTRAQ 4plex (K N-term)
tr|Q5ST81|Q5ST81_HUMAN	R.G(+144.10)SQQYR.A	Y	25.92	881.446	13.9	441.736	2	4.23	10552	2	205	210	iTRAQ 4plex (K N-term)
sp|P68371|TBB4B_HUMAN	R.L(+144.10)HFFMPGFAPLTSR.G	Y	69.38	1763.93	5.4	588.986	3	155.56	85784	8	263	276	iTRAQ 4plex (K N-term)
sp|P68371|TBB4B_HUMAN	K.G(+144.10)HYTEGAELVDSVLDVVR.K	Y	67.93	2102.07	-7.2	701.694	3	152.07	84057	1	104	121	iTRAQ 4plex (K N-term)
sp|P68371|TBB4B_HUMAN	R.IMNTFSVVPSPK(+144.10).V	Y	58.69	1462.8	-8.8	732.399	2	99.26	57816	4	163	174	iTRAQ 4plex (K N-term)
sp|P68371|TBB4B_HUMAN	K.E(+144.10)VDEQMLNVQNK(+144.10).N	Y	56.73	1733.88	0.6	578.968	3	71.07	43873	7	325	336	iTRAQ 4plex (K N-term)
sp|P68371|TBB4B_HUMAN	R.I(+144.10)SEQFTAMFR.R	Y	55.47	1372.69	-3.4	687.351	2	118.22	67199	6	381	390	iTRAQ 4plex (K N-term)
sp|P68371|TBB4B_HUMAN	K.L(+144.10)AVNMVPFPR.L	Y	53.91	1286.73	-2.4	644.369	2	125.14	70652	3	253	262	iTRAQ 4plex (K N-term)
sp|P68371|TBB4B_HUMAN	R.F(+144.10)PGQLNADLR.K	Y	45.93	1273.69	-2.2	637.85	2	89.03	52754	18	242	251	iTRAQ 4plex (K N-term)
sp|P68371|TBB4B_HUMAN	R.F(+144.10)PGQLNADLRK(+144.10).L	Y	37.11	1545.88	7.6	516.306	3	84.45	50498	3	242	252	iTRAQ 4plex (K N-term)
sp|P68371|TBB4B_HUMAN	R.S(+144.10)GPFGQIFRPDNFVFGQSGAGNNWAK(+144.10).G	Y	36.58	3085.54	-17	772.378	4	155.59	85797	1	78	103	iTRAQ 4plex (K N-term)
sp|P68371|TBB4B_HUMAN	K.I(+144.10)REEYPDR.I	Y	31.29	1220.62	21.2	407.891	3	31.2	24188	3	155	162	iTRAQ 4plex (K N-term)
sp|P68371|TBB4B_HUMAN	R.Y(+144.10)LTVAAVFR.G	Y	27.83	1182.69	0.7	592.351	2	92.94	54687	5	310	318	iTRAQ 4plex (Y)
sp|P68371|TBB4B_HUMAN	R.L(+144.10)HFFMPGFAPL.T	Y	27.74	1419.75	-2.8	710.879	2	172.17	93967	2	263	273	iTRAQ 4plex (K N-term)
sp|P68371|TBB4B_HUMAN	R.G(+144.10)SQQYR.A	Y	25.92	881.446	13.9	441.736	2	4.23	10552	2	277	282	iTRAQ 4plex (K N-term)
sp|Q13885|TBB2A_HUMAN	R.L(+144.10)HFFMPGFAPLTSR.G	Y	69.38	1763.93	5.4	588.986	3	155.56	85784	8	263	276	iTRAQ 4plex (K N-term)
sp|Q13885|TBB2A_HUMAN	K.G(+144.10)HYTEGAELVDSVLDVVR.K	Y	67.93	2102.07	-7.2	701.694	3	152.07	84057	1	104	121	iTRAQ 4plex (K N-term)
sp|Q13885|TBB2A_HUMAN	R.A(+144.10)ILVDLEPGTMDSVR.S	Y	62.38	1758.93	4	587.319	3	125.6	70877	1	63	77	iTRAQ 4plex (K N-term)
sp|Q13885|TBB2A_HUMAN	K.E(+144.10)VDEQMLNVQNK(+144.10).N	Y	56.73	1733.88	0.6	578.968	3	71.07	43873	7	325	336	iTRAQ 4plex (K N-term)
sp|Q13885|TBB2A_HUMAN	R.I(+144.10)SEQFTAMFR.R	Y	55.47	1372.69	-3.4	687.351	2	118.22	67199	6	381	390	iTRAQ 4plex (K N-term)
sp|Q13885|TBB2A_HUMAN	K.L(+144.10)AVNMVPFPR.L	Y	53.91	1286.73	-2.4	644.369	2	125.14	70652	3	253	262	iTRAQ 4plex (K N-term)
sp|Q13885|TBB2A_HUMAN	R.F(+144.10)PGQLNADLR.K	Y	45.93	1273.69	-2.2	637.85	2	89.03	52754	18	242	251	iTRAQ 4plex (K N-term)
sp|Q13885|TBB2A_HUMAN	R.F(+144.10)PGQLNADLRK(+144.10).L	Y	37.11	1545.88	7.6	516.306	3	84.45	50498	3	242	252	iTRAQ 4plex (K N-term)
sp|Q13885|TBB2A_HUMAN	R.S(+144.10)GPFGQIFRPDNFVFGQSGAGNNWAK(+144.10).G	Y	36.58	3085.54	-17	772.378	4	155.59	85797	1	78	103	iTRAQ 4plex (K N-term)
sp|Q13885|TBB2A_HUMAN	K.I(+144.10)REEYPDR.I	Y	31.29	1220.62	21.2	407.891	3	31.2	24188	3	155	162	iTRAQ 4plex (K N-term)
sp|Q13885|TBB2A_HUMAN	R.L(+144.10)HFFMPGFAPL.T	Y	27.74	1419.75	-2.8	710.879	2	172.17	93967	2	263	273	iTRAQ 4plex (K N-term)
sp|Q13885|TBB2A_HUMAN	R.G(+144.10)SQQYR.A	Y	25.92	881.446	13.9	441.736	2	4.23	10552	2	277	282	iTRAQ 4plex (K N-term)
sp|Q9BVA1|TBB2B_HUMAN	R.L(+144.10)HFFMPGFAPLTSR.G	Y	69.38	1763.93	5.4	588.986	3	155.56	85784	8	263	276	iTRAQ 4plex (K N-term)
sp|Q9BVA1|TBB2B_HUMAN	K.G(+144.10)HYTEGAELVDSVLDVVR.K	Y	67.93	2102.07	-7.2	701.694	3	152.07	84057	1	104	121	iTRAQ 4plex (K N-term)
sp|Q9BVA1|TBB2B_HUMAN	R.A(+144.10)ILVDLEPGTMDSVR.S	Y	62.38	1758.93	4	587.319	3	125.6	70877	1	63	77	iTRAQ 4plex (K N-term)
sp|Q9BVA1|TBB2B_HUMAN	K.E(+144.10)VDEQMLNVQNK(+144.10).N	Y	56.73	1733.88	0.6	578.968	3	71.07	43873	7	325	336	iTRAQ 4plex (K N-term)
sp|Q9BVA1|TBB2B_HUMAN	R.I(+144.10)SEQFTAMFR.R	Y	55.47	1372.69	-3.4	687.351	2	118.22	67199	6	381	390	iTRAQ 4plex (K N-term)
sp|Q9BVA1|TBB2B_HUMAN	K.L(+144.10)AVNMVPFPR.L	Y	53.91	1286.73	-2.4	644.369	2	125.14	70652	3	253	262	iTRAQ 4plex (K N-term)
sp|Q9BVA1|TBB2B_HUMAN	R.F(+144.10)PGQLNADLR.K	Y	45.93	1273.69	-2.2	637.85	2	89.03	52754	18	242	251	iTRAQ 4plex (K N-term)
sp|Q9BVA1|TBB2B_HUMAN	R.F(+144.10)PGQLNADLRK(+144.10).L	Y	37.11	1545.88	7.6	516.306	3	84.45	50498	3	242	252	iTRAQ 4plex (K N-term)
sp|Q9BVA1|TBB2B_HUMAN	R.S(+144.10)GPFGQIFRPDNFVFGQSGAGNNWAK(+144.10).G	Y	36.58	3085.54	-17	772.378	4	155.59	85797	1	78	103	iTRAQ 4plex (K N-term)
sp|Q9BVA1|TBB2B_HUMAN	K.I(+144.10)REEYPDR.I	Y	31.29	1220.62	21.2	407.891	3	31.2	24188	3	155	162	iTRAQ 4plex (K N-term)
sp|Q9BVA1|TBB2B_HUMAN	R.L(+144.10)HFFMPGFAPL.T	Y	27.74	1419.75	-2.8	710.879	2	172.17	93967	2	263	273	iTRAQ 4plex (K N-term)
sp|Q9BVA1|TBB2B_HUMAN	R.G(+144.10)SQQYR.A	Y	25.92	881.446	13.9	441.736	2	4.23	10552	2	277	282	iTRAQ 4plex (K N-term)
sp|Q13509|TBB3_HUMAN	K.G(+144.10)HYTEGAELVDSVLDVVR.K	Y	67.93	2102.07	-7.2	701.694	3	152.07	84057	1	104	121	iTRAQ 4plex (K N-term)
sp|Q13509|TBB3_HUMAN	R.A(+144.10)ILVDLEPGTMDSVR.S	Y	62.38	1758.93	4	587.319	3	125.6	70877	1	63	77	iTRAQ 4plex (K N-term)
sp|Q13509|TBB3_HUMAN	R.IMNTFSVVPSPK(+144.10).V	Y	58.69	1462.8	-8.8	732.399	2	99.26	57816	4	163	174	iTRAQ 4plex (K N-term)
sp|Q13509|TBB3_HUMAN	R.I(+144.10)SEQFTAMFR.R	Y	55.47	1372.69	-3.4	687.351	2	118.22	67199	6	381	390	iTRAQ 4plex (K N-term)
sp|Q13509|TBB3_HUMAN	K.L(+144.10)AVNMVPFPR.L	Y	53.91	1286.73	-2.4	644.369	2	125.14	70652	3	253	262	iTRAQ 4plex (K N-term)
sp|Q13509|TBB3_HUMAN	R.F(+144.10)PGQLNADLR.K	Y	45.93	1273.69	-2.2	637.85	2	89.03	52754	18	242	251	iTRAQ 4plex (K N-term)
sp|Q13509|TBB3_HUMAN	R.F(+144.10)PGQLNADLRK(+144.10).L	Y	37.11	1545.88	7.6	516.306	3	84.45	50498	3	242	252	iTRAQ 4plex (K N-term)
sp|Q13509|TBB3_HUMAN	R.L(+144.10)HFFMPGFAPL.T	Y	27.74	1419.75	-2.8	710.879	2	172.17	93967	2	263	273	iTRAQ 4plex (K N-term)
sp|Q13509|TBB3_HUMAN	R.G(+144.10)SQQYR.A	Y	25.92	881.446	13.9	441.736	2	4.23	10552	2	277	282	iTRAQ 4plex (K N-term)
tr|A0A0B4J269|A0A0B4J269_HUMAN	K.G(+144.10)HYTEGAELVDSVLDVVR.K	Y	67.93	2102.07	-7.2	701.694	3	152.07	84057	1	451	468	iTRAQ 4plex (K N-term)
tr|A0A0B4J269|A0A0B4J269_HUMAN	R.A(+144.10)ILVDLEPGTMDSVR.S	Y	62.38	1758.93	4	587.319	3	125.6	70877	1	410	424	iTRAQ 4plex (K N-term)
tr|A0A0B4J269|A0A0B4J269_HUMAN	R.IMNTFSVVPSPK(+144.10).V	Y	58.69	1462.8	-8.8	732.399	2	99.26	57816	4	510	521	iTRAQ 4plex (K N-term)
tr|A0A0B4J269|A0A0B4J269_HUMAN	R.I(+144.10)SEQFTAMFR.R	Y	55.47	1372.69	-3.4	687.351	2	118.22	67199	6	728	737	iTRAQ 4plex (K N-term)
tr|A0A0B4J269|A0A0B4J269_HUMAN	K.L(+144.10)AVNMVPFPR.L	Y	53.91	1286.73	-2.4	644.369	2	125.14	70652	3	600	609	iTRAQ 4plex (K N-term)
tr|A0A0B4J269|A0A0B4J269_HUMAN	R.F(+144.10)PGQLNADLR.K	Y	45.93	1273.69	-2.2	637.85	2	89.03	52754	18	589	598	iTRAQ 4plex (K N-term)
tr|A0A0B4J269|A0A0B4J269_HUMAN	R.F(+144.10)PGQLNADLRK(+144.10).L	Y	37.11	1545.88	7.6	516.306	3	84.45	50498	3	589	599	iTRAQ 4plex (K N-term)
tr|A0A0B4J269|A0A0B4J269_HUMAN	R.L(+144.10)HFFMPGFAPL.T	Y	27.74	1419.75	-2.8	710.879	2	172.17	93967	2	610	620	iTRAQ 4plex (K N-term)
tr|A0A0B4J269|A0A0B4J269_HUMAN	R.G(+144.10)SQQYR.A	Y	25.92	881.446	13.9	441.736	2	4.23	10552	2	624	629	iTRAQ 4plex (K N-term)
sp|P04350|TBB4A_HUMAN	R.L(+144.10)HFFMPGFAPLTSR.G	Y	69.38	1763.93	5.4	588.986	3	155.56	85784	8	263	276	iTRAQ 4plex (K N-term)
sp|P04350|TBB4A_HUMAN	R.IMNTFSVVPSPK(+144.10).V	Y	58.69	1462.8	-8.8	732.399	2	99.26	57816	4	163	174	iTRAQ 4plex (K N-term)
sp|P04350|TBB4A_HUMAN	R.I(+144.10)SEQFTAMFR.R	Y	55.47	1372.69	-3.4	687.351	2	118.22	67199	6	381	390	iTRAQ 4plex (K N-term)
sp|P04350|TBB4A_HUMAN	K.L(+144.10)AVNMVPFPR.L	Y	53.91	1286.73	-2.4	644.369	2	125.14	70652	3	253	262	iTRAQ 4plex (K N-term)
sp|P04350|TBB4A_HUMAN	R.F(+144.10)PGQLNADLR.K	Y	45.93	1273.69	-2.2	637.85	2	89.03	52754	18	242	251	iTRAQ 4plex (K N-term)
sp|P04350|TBB4A_HUMAN	R.F(+144.10)PGQLNADLRK(+144.10).L	Y	37.11	1545.88	7.6	516.306	3	84.45	50498	3	242	252	iTRAQ 4plex (K N-term)
sp|P04350|TBB4A_HUMAN	R.S(+144.10)GPFGQIFRPDNFVFGQSGAGNNWAK(+144.10).G	Y	36.58	3085.54	-17	772.378	4	155.59	85797	1	78	103	iTRAQ 4plex (K N-term)
sp|P04350|TBB4A_HUMAN	R.Y(+144.10)LTVAAVFR.G	Y	27.83	1182.69	0.7	592.351	2	92.94	54687	5	310	318	iTRAQ 4plex (Y)
sp|P04350|TBB4A_HUMAN	R.L(+144.10)HFFMPGFAPL.T	Y	27.74	1419.75	-2.8	710.879	2	172.17	93967	2	263	273	iTRAQ 4plex (K N-term)
sp|P04350|TBB4A_HUMAN	R.G(+144.10)SQQYR.A	Y	25.92	881.446	13.9	441.736	2	4.23	10552	2	277	282	iTRAQ 4plex (K N-term)
tr|A0A075B736|A0A075B736_HUMAN	R.L(+144.10)HFFMPGFAPLTSR.G	Y	69.38	1763.93	5.4	588.986	3	155.56	85784	8	226	239	iTRAQ 4plex (K N-term)
tr|A0A075B736|A0A075B736_HUMAN	K.L(+144.10)AVNMVPFPR.L	Y	53.91	1286.73	-2.4	644.369	2	125.14	70652	3	216	225	iTRAQ 4plex (K N-term)
tr|A0A075B736|A0A075B736_HUMAN	R.F(+144.10)PGQLNADLR.K	Y	45.93	1273.69	-2.2	637.85	2	89.03	52754	18	205	214	iTRAQ 4plex (K N-term)
tr|A0A075B736|A0A075B736_HUMAN	R.F(+144.10)PGQLNADLRK(+144.10).L	Y	37.11	1545.88	7.6	516.306	3	84.45	50498	3	205	215	iTRAQ 4plex (K N-term)
tr|A0A075B736|A0A075B736_HUMAN	K.I(+144.10)REEYPDR.I	Y	31.29	1220.62	21.2	407.891	3	31.2	24188	3	118	125	iTRAQ 4plex (K N-term)
tr|A0A075B736|A0A075B736_HUMAN	R.L(+144.10)HFFMPGFAPL.T	Y	27.74	1419.75	-2.8	710.879	2	172.17	93967	2	226	236	iTRAQ 4plex (K N-term)
tr|A0A075B736|A0A075B736_HUMAN	R.G(+144.10)SQQYR.A	Y	25.92	881.446	13.9	441.736	2	4.23	10552	2	240	245	iTRAQ 4plex (K N-term)
tr|Q5SQY0|Q5SQY0_HUMAN	R.L(+144.10)HFFMPGFAPLTSR.G	Y	69.38	1763.93	5.4	588.986	3	155.56	85784	8	229	242	iTRAQ 4plex (K N-term)
tr|Q5SQY0|Q5SQY0_HUMAN	K.L(+144.10)AVNMVPFPR.L	Y	53.91	1286.73	-2.4	644.369	2	125.14	70652	3	219	228	iTRAQ 4plex (K N-term)
tr|Q5SQY0|Q5SQY0_HUMAN	R.F(+144.10)PGQLNADLR.K	Y	45.93	1273.69	-2.2	637.85	2	89.03	52754	18	208	217	iTRAQ 4plex (K N-term)
tr|Q5SQY0|Q5SQY0_HUMAN	R.F(+144.10)PGQLNADLRK(+144.10).L	Y	37.11	1545.88	7.6	516.306	3	84.45	50498	3	208	218	iTRAQ 4plex (K N-term)
tr|Q5SQY0|Q5SQY0_HUMAN	K.I(+144.10)REEYPDR.I	Y	31.29	1220.62	21.2	407.891	3	31.2	24188	3	121	128	iTRAQ 4plex (K N-term)
tr|Q5SQY0|Q5SQY0_HUMAN	R.L(+144.10)HFFMPGFAPL.T	Y	27.74	1419.75	-2.8	710.879	2	172.17	93967	2	229	239	iTRAQ 4plex (K N-term)
tr|Q5SQY0|Q5SQY0_HUMAN	R.G(+144.10)SQQYR.A	Y	25.92	881.446	13.9	441.736	2	4.23	10552	2	243	248	iTRAQ 4plex (K N-term)
sp|Q3ZCM7|TBB8_HUMAN	R.L(+144.10)HFFMPGFAPLTSR.G	Y	69.38	1763.93	5.4	588.986	3	155.56	85784	8	263	276	iTRAQ 4plex (K N-term)
sp|Q3ZCM7|TBB8_HUMAN	K.L(+144.10)AVNMVPFPR.L	Y	53.91	1286.73	-2.4	644.369	2	125.14	70652	3	253	262	iTRAQ 4plex (K N-term)
sp|Q3ZCM7|TBB8_HUMAN	R.F(+144.10)PGQLNADLR.K	Y	45.93	1273.69	-2.2	637.85	2	89.03	52754	18	242	251	iTRAQ 4plex (K N-term)
sp|Q3ZCM7|TBB8_HUMAN	R.F(+144.10)PGQLNADLRK(+144.10).L	Y	37.11	1545.88	7.6	516.306	3	84.45	50498	3	242	252	iTRAQ 4plex (K N-term)
sp|Q3ZCM7|TBB8_HUMAN	K.I(+144.10)REEYPDR.I	Y	31.29	1220.62	21.2	407.891	3	31.2	24188	3	155	162	iTRAQ 4plex (K N-term)
sp|Q3ZCM7|TBB8_HUMAN	R.L(+144.10)HFFMPGFAPL.T	Y	27.74	1419.75	-2.8	710.879	2	172.17	93967	2	263	273	iTRAQ 4plex (K N-term)
sp|Q3ZCM7|TBB8_HUMAN	R.G(+144.10)SQQYR.A	Y	25.92	881.446	13.9	441.736	2	4.23	10552	2	277	282	iTRAQ 4plex (K N-term)
sp|A6NNZ2|TBB8L_HUMAN	R.L(+144.10)HFFMPGFAPLTSR.G	Y	69.38	1763.93	5.4	588.986	3	155.56	85784	8	263	276	iTRAQ 4plex (K N-term)
sp|A6NNZ2|TBB8L_HUMAN	K.L(+144.10)AVNMVPFPR.L	Y	53.91	1286.73	-2.4	644.369	2	125.14	70652	3	253	262	iTRAQ 4plex (K N-term)
sp|A6NNZ2|TBB8L_HUMAN	R.F(+144.10)PGQLNADLR.K	Y	45.93	1273.69	-2.2	637.85	2	89.03	52754	18	242	251	iTRAQ 4plex (K N-term)
sp|A6NNZ2|TBB8L_HUMAN	R.F(+144.10)PGQLNADLRK(+144.10).L	Y	37.11	1545.88	7.6	516.306	3	84.45	50498	3	242	252	iTRAQ 4plex (K N-term)
sp|A6NNZ2|TBB8L_HUMAN	K.I(+144.10)REEYPDR.I	Y	31.29	1220.62	21.2	407.891	3	31.2	24188	3	155	162	iTRAQ 4plex (K N-term)
sp|A6NNZ2|TBB8L_HUMAN	R.L(+144.10)HFFMPGFAPL.T	Y	27.74	1419.75	-2.8	710.879	2	172.17	93967	2	263	273	iTRAQ 4plex (K N-term)
sp|A6NNZ2|TBB8L_HUMAN	R.G(+144.10)SQQYR.A	Y	25.92	881.446	13.9	441.736	2	4.23	10552	2	277	282	iTRAQ 4plex (K N-term)
sp|Q9H4B7|TBB1_HUMAN	K.L(+144.10)AVNMVPFPR.L	Y	53.91	1286.73	-2.4	644.369	2	125.14	70652	3	253	262	iTRAQ 4plex (K N-term)
sp|Q9H4B7|TBB1_HUMAN	R.F(+144.10)PGQLNADLR.K	Y	45.93	1273.69	-2.2	637.85	2	89.03	52754	18	242	251	iTRAQ 4plex (K N-term)
sp|Q9H4B7|TBB1_HUMAN	R.F(+144.10)PGQLNADLRK(+144.10).L	Y	37.11	1545.88	7.6	516.306	3	84.45	50498	3	242	252	iTRAQ 4plex (K N-term)
[truncated: 3,229 more rows]

## Sheet: Rep_1_quant_proteins
Accession	-10lgP	Coverage (%)	#Peptides	#Unique	PTM	Avg. Mass	Description	Ratio 114	Ratio 116	Ratio 117	SD 114	SD 116	SD 117
[truncated: 772 more rows]

[truncated: 9 more sheets: Rep_2_all_proteins, Rep_2_all_peps, Rep_2_quant_proteins, Rep_3_all_proteins, Rep_3_all_peps, Rep_3_quant_proteins, Rep_1_denovo_peptides, Rep_2_denovo_peptides, Rep_3_denovo_peptides]
