# Supplementary material for: Comparative Proteomic Study of the Antiproliferative Activity of Frog Host-Defence Peptide Caerin 1.9 and Its Additive Effect with Caerin 1.1 on TC-1 Cells Transformed with HPV16 E6 and E7
Source: Biomed Res Int. 2018 May 13;2018:7382351. doi: 10.1155/2018/7382351 (PMC5971270; doi:10.1155/2018/7382351)
Supplement: Supplementary Materials — Figure S1: caerin 1.1 and caerin 1.9 are able to inhibit the proliferation of HeLa cells but not HMC cells, measured by MTT assay. 1 × 105 of HeLa cells or 1 × 105 of HMC cells was cultured either in media, or plus different concentrations (25, 20, 15, 10, and 5 μg/ml) of caerin 1.1, caerin 1.9, the mixture of 1.1 and 1.9 (mass ratio 1 : 1) or P3 for 24 hours before MTT assay was performed. (A) Caerin 1.1 treated HeLa cells, (B) caerin 1.9 treated HeLa cells, (C) the mixture treated HeLa cells, (D) P3 treated HeLa cells, (E) caerin 1.1 treated HMC cells, (F) caerin 1.9 treated HMC, (G) the mixture treated HMC cells, and (H) P3 treated HMC cells. Each bar represents the statistical mean from three biological replicates (performed in triplicate) and the error bars represent the standard deviation. Figure S2: probabilistic PCA is used to calculate principal components. x and y-axes show principal component 1 and principal component 2 that explain 68.8% and 19.5% of the total variance, respectively. N = 9 data points. Figure S3: heatmap of differentially expressed proteins in TC-1 cells identified from iTRAQ analysis of the first biological replicate treated with caerin 1.9 and the mixture (caerin 1.9 plus caerin 1.1 at a mass ratio of 1 : 1) at 24 h and untreated cells as control. The figure was generated using PEAKS studio. The decreased and increased proteins are indicated by range of green and red intensities, respectively. Figure S4: heatmap of differentially expressed proteins in TC-1 cells identified from iTRAQ analysis of the second biological replicate treated with caerin 1.9 and the mixture (caerin 1.9 plus caerin 1.1 at a mass ratio of 1 : 1) at 24 h and untreated cells as control. The figure was generated using PEAKS studio. The decreased and increased proteins are indicated by range of green and red intensities, respectively. Figure S5: heatmap of differentially expressed proteins in TC-1 cells identified from iTRAQ analysis of the third biological replicat [file 7382351.f1.zip › S2 Table ESP identification & quantitation.xlsx]

## Sheet: control_proteins
Accession	-10lgP	Coverage (%)	#Peptides	#Unique	PTM	Avg. Mass	Description
tr|A0A0C4DGB6|A0A0C4DGB6_HUMAN	243.14	40	34	2	Carbamidomethylation; Amidation; Deamidation (NQ); Oxidation (M); Acetylation (K)	69227	Serum albumin OS=Homo sapiens GN=ALB PE=1 SV=1
sp|P02768|ALBU_HUMAN	243.14	39	34	2	Carbamidomethylation; Amidation; Deamidation (NQ); Oxidation (M); Acetylation (K)	69367	Serum albumin OS=Homo sapiens GN=ALB PE=1 SV=2
tr|A0A087WWT3|A0A087WWT3_HUMAN	195.21	40	16	2	Carbamidomethylation; Amidation; Deamidation (NQ); Oxidation (M); Acetylation (K)	45148	Serum albumin OS=Homo sapiens GN=ALB PE=1 SV=1
sp|P01023|A2MG_HUMAN	191.66	5	10	8	Pyro-glu from Q; Acetylation (K)	163290	Alpha-2-macroglobulin OS=Homo sapiens GN=A2M PE=1 SV=3
sp|P02765|FETUA_HUMAN	160.29	10	10	9	Carbamidomethylation; Pyro-glu from Q; Acetylation (K)	39325	Alpha-2-HS-glycoprotein OS=Homo sapiens GN=AHSG PE=1 SV=1
sp|P69905|HBA_HUMAN	179.89	38	10	10		15258	Hemoglobin subunit alpha OS=Homo sapiens GN=HBA1 PE=1 SV=2
sp|P02771|FETA_HUMAN	197.28	11	9	8	Carbamidomethylation; Deamidation (NQ)	68678	Alpha-fetoprotein OS=Homo sapiens GN=AFP PE=1 SV=1
tr|J3KMX3|J3KMX3_HUMAN	193.53	10	9	8	Carbamidomethylation; Deamidation (NQ)	70450	Alpha-fetoprotein OS=Homo sapiens GN=AFP PE=1 SV=1
tr|H7C013|H7C013_HUMAN	111.49	35	7	2	Carbamidomethylation; Deamidation (NQ); Oxidation (M); Acetylation (K)	22859	Serum albumin (Fragment) OS=Homo sapiens GN=ALB PE=1 SV=1
tr|C9JV77|C9JV77_HUMAN	131.77	6	7	6	Carbamidomethylation; Pyro-glu from Q	39412	Alpha-2-HS-glycoprotein OS=Homo sapiens GN=AHSG PE=1 SV=1
tr|Q5T985|Q5T985_HUMAN	132.06	8	7	7		105216	Inter-alpha-trypsin inhibitor heavy chain H2 OS=Homo sapiens GN=ITIH2 PE=1 SV=1
tr|A0A087WTE1|A0A087WTE1_HUMAN	132.06	8	7	7		106657	Inter-alpha-trypsin inhibitor heavy chain H2 OS=Homo sapiens GN=ITIH2 PE=1 SV=1
sp|P19823|ITIH2_HUMAN	132.06	8	7	7		106463	Inter-alpha-trypsin inhibitor heavy chain H2 OS=Homo sapiens GN=ITIH2 PE=1 SV=2
tr|E7EQB2|E7EQB2_HUMAN	150.7	9	6	5	Carbamidomethylation; Deamidation (NQ)	76626	Lactotransferrin (Fragment) OS=Homo sapiens GN=LTF PE=1 SV=1
tr|E7ER44|E7ER44_HUMAN	150.7	9	6	5	Carbamidomethylation; Deamidation (NQ)	77970	Lactotransferrin OS=Homo sapiens GN=LTF PE=1 SV=1
sp|P02788|TRFL_HUMAN	150.7	9	6	5	Carbamidomethylation; Deamidation (NQ)	78182	Lactotransferrin OS=Homo sapiens GN=LTF PE=1 SV=6
sp|P02774|VTDB_HUMAN	148.21	10	6	6	Carbamidomethylation; Deamidation (NQ)	52964	Vitamin D-binding protein OS=Homo sapiens GN=GC PE=1 SV=1
tr|D6RF35|D6RF35_HUMAN	148.21	10	6	6	Carbamidomethylation; Deamidation (NQ)	53021	Vitamin D-binding protein OS=Homo sapiens GN=GC PE=1 SV=1
sp|P02787|TRFE_HUMAN	108.58	4	5	4	Carbamidomethylation	77064	Serotransferrin OS=Homo sapiens GN=TF PE=1 SV=3
tr|A0A087WW43|A0A087WW43_HUMAN	138.94	5	5	5		75078	Inter-alpha-trypsin inhibitor heavy chain H3 OS=Homo sapiens GN=ITIH3 PE=1 SV=1
tr|E7ET33|E7ET33_HUMAN	138.94	5	5	5		78130	Inter-alpha-trypsin inhibitor heavy chain H3 OS=Homo sapiens GN=ITIH3 PE=1 SV=1
sp|Q06033|ITIH3_HUMAN	138.94	4	5	5		99849	Inter-alpha-trypsin inhibitor heavy chain H3 OS=Homo sapiens GN=ITIH3 PE=1 SV=2
tr|G3V1N2|G3V1N2_HUMAN	118.1	31	4	4		11948	HCG1745306 isoform CRA_a OS=Homo sapiens GN=HBA2 PE=1 SV=1
tr|D6RBJ7|D6RBJ7_HUMAN	108.2	8	4	4	Carbamidomethylation; Deamidation (NQ)	38797	Vitamin D-binding protein OS=Homo sapiens GN=GC PE=1 SV=1
tr|Q5T987|Q5T987_HUMAN	97.47	16	4	4		26821	Inter-alpha-trypsin inhibitor heavy chain H2 (Fragment) OS=Homo sapiens GN=ITIH2 PE=1 SV=1
tr|Q5VY30|Q5VY30_HUMAN	129.67	16	4	4	Carbamidomethylation; Pyro-glu from Q	22974	Retinol binding protein 4 plasma isoform CRA_b OS=Homo sapiens GN=RBP4 PE=1 SV=2
tr|A0A0C4DGV7|A0A0C4DGV7_HUMAN	129.67	16	4	4	Carbamidomethylation; Pyro-glu from Q	22868	Retinol-binding protein 4 OS=Homo sapiens GN=RBP4 PE=1 SV=1
sp|P02753|RET4_HUMAN	129.67	15	4	4	Carbamidomethylation; Pyro-glu from Q	23010	Retinol-binding protein 4 OS=Homo sapiens GN=RBP4 PE=1 SV=3
sp|P00747|PLMN_HUMAN	118.6	5	4	4	Carbamidomethylation; Amidation	90569	Plasminogen OS=Homo sapiens GN=PLG PE=1 SV=2
sp|P23142|FBLN1_HUMAN	109.3	7	4	4	Carbamidomethylation	77214	Fibulin-1 OS=Homo sapiens GN=FBLN1 PE=1 SV=4
tr|B1AHL2|B1AHL2_HUMAN	109.3	7	4	4	Carbamidomethylation	78329	Fibulin-1 OS=Homo sapiens GN=FBLN1 PE=1 SV=1
tr|C9JVG0|C9JVG0_HUMAN	86	7	3	3	Carbamidomethylation	14691	Serotransferrin (Fragment) OS=Homo sapiens GN=TF PE=1 SV=1
tr|A0A0G2JL54|A0A0G2JL54_HUMAN	84.47	2	3	3	Deamidation (NQ)	187715	Complement C4-B OS=Homo sapiens GN=C4B_2 PE=1 SV=1
tr|A0A140TA29|A0A140TA29_HUMAN	84.47	2	3	3	Deamidation (NQ)	187665	Complement C4-B OS=Homo sapiens GN=C4B PE=1 SV=1
tr|A0A140TA44|A0A140TA44_HUMAN	84.47	2	3	3	Deamidation (NQ)	187659	Complement C4-A OS=Homo sapiens GN=C4A PE=1 SV=1
tr|A0A140TA32|A0A140TA32_HUMAN	84.47	2	3	3	Deamidation (NQ)	187763	Complement C4-A OS=Homo sapiens GN=C4A PE=1 SV=1
tr|A0A140TA49|A0A140TA49_HUMAN	84.47	2	3	3	Deamidation (NQ)	187793	Complement C4-A OS=Homo sapiens GN=C4A PE=1 SV=1
tr|F5GXS0|F5GXS0_HUMAN	84.47	2	3	3	Deamidation (NQ)	187668	Complement C4-B OS=Homo sapiens GN=C4B PE=1 SV=1
tr|A0A0G2JPR0|A0A0G2JPR0_HUMAN	84.47	2	3	3	Deamidation (NQ)	192874	Complement C4-A OS=Homo sapiens GN=C4A PE=1 SV=1
sp|P0C0L4|CO4A_HUMAN	84.47	2	3	3	Deamidation (NQ)	192784	Complement C4-A OS=Homo sapiens GN=C4A PE=1 SV=2
sp|P0C0L5|CO4B_HUMAN	84.47	2	3	3	Deamidation (NQ)	192750	Complement C4-B OS=Homo sapiens GN=C4B PE=1 SV=2
sp|P02795|MT2_HUMAN	85.68	51	3	1	Carbamidomethylation	6042	Metallothionein-2 OS=Homo sapiens GN=MT2A PE=1 SV=1
sp|P02749|APOH_HUMAN	71.51	3	3	3	Carbamidomethylation	38298	Beta-2-glycoprotein 1 OS=Homo sapiens GN=APOH PE=1 SV=3
tr|F8W7L3|F8W7L3_HUMAN	61.65	5	2	2		18724	Alpha-2-macroglobulin (Fragment) OS=Homo sapiens GN=A2M PE=1 SV=1
sp|P02008|HBAZ_HUMAN	64.78	6	2	2		15637	Hemoglobin subunit zeta OS=Homo sapiens GN=HBZ PE=1 SV=2
tr|H7C5E8|H7C5E8_HUMAN	61.22	14	2	1	Carbamidomethylation	15847	Serotransferrin (Fragment) OS=Homo sapiens GN=TF PE=1 SV=1
sp|P01024|CO3_HUMAN	91.91	1	2	2		187147	Complement C3 OS=Homo sapiens GN=C3 PE=1 SV=2
sp|P04732|MT1E_HUMAN	84.6	33	2	1	Carbamidomethylation	6014	Metallothionein-1E OS=Homo sapiens GN=MT1E PE=1 SV=1
tr|F8W6P5|F8W6P5_HUMAN	79.88	23	2	1		9670	Hemoglobin subunit beta (Fragment) OS=Homo sapiens GN=HBB PE=1 SV=1
sp|P68871|HBB_HUMAN	79.88	14	2	1		15998	Hemoglobin subunit beta OS=Homo sapiens GN=HBB PE=1 SV=2
sp|P02452|CO1A1_HUMAN	79.86	2	2	2		138942	Collagen alpha-1(I) chain OS=Homo sapiens GN=COL1A1 PE=1 SV=5
sp|P36955|PEDF_HUMAN	72.34	5	2	2		46312	Pigment epithelium-derived factor OS=Homo sapiens GN=SERPINF1 PE=1 SV=4
sp|P07996|TSP1_HUMAN	66.38	2	2	2	Carbamidomethylation	129383	Thrombospondin-1 OS=Homo sapiens GN=THBS1 PE=1 SV=2
tr|G3XAP6|G3XAP6_HUMAN	65.1	2	2	1		79697	Cartilage oligomeric matrix protein OS=Homo sapiens GN=COMP PE=1 SV=1
sp|P49747|COMP_HUMAN	65.1	2	2	1		82861	Cartilage oligomeric matrix protein OS=Homo sapiens GN=COMP PE=1 SV=2
tr|G3V2B9|G3V2B9_HUMAN	63.13	40	2	2	Acetylation (K)	11798	Alpha-1-antitrypsin (Fragment) OS=Homo sapiens GN=SERPINA1 PE=1 SV=1
tr|A0A0G2JRN3|A0A0G2JRN3_HUMAN	63.13	12	2	2	Acetylation (K)	40235	Alpha-1-antitrypsin OS=Homo sapiens GN=SERPINA1 PE=1 SV=1
tr|A0A024R6I7|A0A024R6I7_HUMAN	63.13	10	2	2	Acetylation (K)	46709	Alpha-1-antitrypsin OS=Homo sapiens GN=SERPINA1 PE=1 SV=1
sp|P01009|A1AT_HUMAN	63.13	10	2	2	Acetylation (K)	46737	Alpha-1-antitrypsin OS=Homo sapiens GN=SERPINA1 PE=1 SV=3
tr|E7ES19|E7ES19_HUMAN	59.57	2	2	1	Carbamidomethylation	96006	Thrombospondin-4 OS=Homo sapiens GN=THBS4 PE=1 SV=1
sp|P35443|TSP4_HUMAN	59.57	2	2	1	Carbamidomethylation	105869	Thrombospondin-4 OS=Homo sapiens GN=THBS4 PE=1 SV=2
sp|P43652|AFAM_HUMAN	44.29	2	2	2		69069	Afamin OS=Homo sapiens GN=AFM PE=1 SV=1
tr|A0A0J9YY65|A0A0J9YY65_HUMAN	62.24	6	2	2	Carbamidomethylation	27853	Alpha-2-antiplasmin (Fragment) OS=Homo sapiens GN=SERPINF2 PE=1 SV=1
tr|C9JMH6|C9JMH6_HUMAN	62.24	6	2	2	Carbamidomethylation	27823	Alpha-2-antiplasmin (Fragment) OS=Homo sapiens GN=SERPINF2 PE=1 SV=1
tr|A0A0G2JPA8|A0A0G2JPA8_HUMAN	62.24	4	2	2	Carbamidomethylation	47937	Alpha-2-antiplasmin OS=Homo sapiens GN=SERPINF2 PE=1 SV=1
sp|P08697|A2AP_HUMAN	62.24	3	2	2	Carbamidomethylation	54566	Alpha-2-antiplasmin OS=Homo sapiens GN=SERPINF2 PE=1 SV=3
tr|A6NL76|A6NL76_HUMAN	59.65	10	2	1		28165	Actin alpha skeletal muscle OS=Homo sapiens GN=ACTA1 PE=1 SV=3
sp|P63267|ACTH_HUMAN	59.65	7	2	1		41877	Actin gamma-enteric smooth muscle OS=Homo sapiens GN=ACTG2 PE=1 SV=1
sp|P68032|ACTC_HUMAN	59.65	7	2	1		42019	Actin alpha cardiac muscle 1 OS=Homo sapiens GN=ACTC1 PE=1 SV=1
sp|P68133|ACTS_HUMAN	59.65	7	2	1		42051	Actin alpha skeletal muscle OS=Homo sapiens GN=ACTA1 PE=1 SV=1
sp|P62736|ACTA_HUMAN	59.65	7	2	1		42009	Actin aortic smooth muscle OS=Homo sapiens GN=ACTA2 PE=1 SV=1
sp|P63261|ACTG_HUMAN	59.65	7	2	1		41793	Actin cytoplasmic 2 OS=Homo sapiens GN=ACTG1 PE=1 SV=1
sp|P60709|ACTB_HUMAN	59.65	7	2	1		41737	Actin cytoplasmic 1 OS=Homo sapiens GN=ACTB PE=1 SV=1
tr|D6RF20|D6RF20_HUMAN	31.37	5	1	1	Carbamidomethylation	16083	Vitamin D-binding protein (Fragment) OS=Homo sapiens GN=GC PE=1 SV=1
sp|Q02325|PLGB_HUMAN	35.81	7	1	1		10971	Plasminogen-like protein B OS=Homo sapiens GN=PLGLB1 PE=3 SV=1
sp|Q15195|PLGA_HUMAN	35.81	7	1	1		10915	Plasminogen-like protein A OS=Homo sapiens GN=PLGLA PE=2 SV=1
tr|Q5TEH5|Q5TEH5_HUMAN	35.81	5	1	1		15444	HCG2029799 isoform CRA_b OS=Homo sapiens GN=PLG PE=1 SV=1
tr|A6PVI2|A6PVI2_HUMAN	35.81	4	1	1		18746	Plasminogen (Fragment) OS=Homo sapiens GN=PLG PE=1 SV=1
tr|B1AHN3|B1AHN3_HUMAN	66.12	5	1	1	Carbamidomethylation	18394	Fibulin-1 (Fragment) OS=Homo sapiens GN=FBLN1 PE=1 SV=1
tr|B1AHM8|B1AHM8_HUMAN	66.12	5	1	1	Carbamidomethylation	19404	Fibulin-1 (Fragment) OS=Homo sapiens GN=FBLN1 PE=1 SV=1
tr|H7C1M6|H7C1M6_HUMAN	66.12	5	1	1	Carbamidomethylation	20167	Fibulin-1 (Fragment) OS=Homo sapiens GN=FBLN1 PE=1 SV=1
tr|B1AHM7|B1AHM7_HUMAN	66.12	6	1	1	Carbamidomethylation	15432	Fibulin-1 (Fragment) OS=Homo sapiens GN=FBLN1 PE=1 SV=1
tr|B1AHM9|B1AHM9_HUMAN	66.12	5	1	1	Carbamidomethylation	20471	Fibulin-1 (Fragment) OS=Homo sapiens GN=FBLN1 PE=1 SV=1
tr|H3BU80|H3BU80_HUMAN	41.09	21	1	1	Carbamidomethylation	3786	Metallothionein OS=Homo sapiens GN=MT1E PE=3 SV=1
sp|Q93083|MT1L_HUMAN	41.09	13	1	1	Carbamidomethylation	6062	Metallothionein-1L OS=Homo sapiens GN=MT1L PE=2 SV=1
sp|P07438|MT1B_HUMAN	41.09	13	1	1	Carbamidomethylation	6115	Metallothionein-1B OS=Homo sapiens GN=MT1B PE=3 SV=1
sp|P04733|MT1F_HUMAN	41.09	13	1	1	Carbamidomethylation	6086	Metallothionein-1F OS=Homo sapiens GN=MT1F PE=1 SV=1
sp|P01042|KNG1_HUMAN	61.85	1	1	1		71957	Kininogen-1 OS=Homo sapiens GN=KNG1 PE=1 SV=2
sp|P02656|APOC3_HUMAN	61.81	16	1	1		10852	Apolipoprotein C-III OS=Homo sapiens GN=APOC3 PE=1 SV=1
tr|B0YIW2|B0YIW2_HUMAN	61.81	14	1	1		12816	Apolipoprotein C-III OS=Homo sapiens GN=APOC3 PE=1 SV=1
tr|E9PPA1|E9PPA1_HUMAN	48.32	6	1	1		18551	Oxysterols receptor LXR-alpha (Fragment) OS=Homo sapiens GN=NR1H3 PE=1 SV=1
tr|C9JCS0|C9JCS0_HUMAN	48.32	5	1	1		22375	Oxysterols receptor LXR-alpha (Fragment) OS=Homo sapiens GN=NR1H3 PE=1 SV=1
tr|C9JBS2|C9JBS2_HUMAN	48.32	5	1	1		23099	Oxysterols receptor LXR-alpha (Fragment) OS=Homo sapiens GN=NR1H3 PE=1 SV=1
tr|E9PID2|E9PID2_HUMAN	48.32	3	1	1		34137	Oxysterols receptor LXR-alpha OS=Homo sapiens GN=NR1H3 PE=1 SV=1
tr|B5MBY7|B5MBY7_HUMAN	48.32	3	1	1		38851	Oxysterols receptor LXR-alpha OS=Homo sapiens GN=NR1H3 PE=1 SV=1
sp|Q13133|NR1H3_HUMAN	48.32	2	1	1		50396	Oxysterols receptor LXR-alpha OS=Homo sapiens GN=NR1H3 PE=1 SV=2
tr|B4DXU5|B4DXU5_HUMAN	48.32	2	1	1		51113	Oxysterols receptor LXR-alpha OS=Homo sapiens GN=NR1H3 PE=1 SV=1
tr|E9PLL4|E9PLL4_HUMAN	48.32	2	1	1		52811	Oxysterols receptor LXR-alpha OS=Homo sapiens GN=NR1H3 PE=1 SV=1
tr|C9JV37|C9JV37_HUMAN	47.76	3	1	1	Carbamidomethylation	35932	Prothrombin (Fragment) OS=Homo sapiens GN=F2 PE=1 SV=1
tr|E9PIT3|E9PIT3_HUMAN	47.76	2	1	1	Carbamidomethylation	65409	Prothrombin OS=Homo sapiens GN=F2 PE=1 SV=1
sp|P00734|THRB_HUMAN	47.76	1	1	1	Carbamidomethylation	70037	Prothrombin OS=Homo sapiens GN=F2 PE=1 SV=2
tr|A0A0G2JH38|A0A0G2JH38_HUMAN	46.6	1	1	1	Carbamidomethylation	65770	Complement factor B (Fragment) OS=Homo sapiens GN=CFB PE=3 SV=1
sp|P00751|CFAB_HUMAN	46.6	1	1	1	Carbamidomethylation	85533	Complement factor B OS=Homo sapiens GN=CFB PE=1 SV=2
tr|E7ETN3|E7ETN3_HUMAN	46.6	1	1	1	Carbamidomethylation	124016	Uncharacterized protein OS=Homo sapiens PE=3 SV=1
tr|B4E1Z4|B4E1Z4_HUMAN	46.6	1	1	1	Carbamidomethylation	140942	Uncharacterized protein OS=Homo sapiens PE=1 SV=1
tr|C9JRT3|C9JRT3_HUMAN	35.37	6	1	1	Carbamidomethylation	16094	Complement factor B (Fragment) OS=Homo sapiens GN=CFB PE=4 SV=1
sp|P02649|APOE_HUMAN	40.65	3	1	1		36154	Apolipoprotein E OS=Homo sapiens GN=APOE PE=1 SV=1
sp|P02748|CO9_HUMAN	38.79	2	1	1		63173	Complement component C9 OS=Homo sapiens GN=C9 PE=1 SV=2
sp|O95497|VNN1_HUMAN	37.81	2	1	1	Carbamidomethylation	57012	Pantetheinase OS=Homo sapiens GN=VNN1 PE=1 SV=2
sp|Q6ZU45|YA021_HUMAN	35.63	3	1	1		25812	Putative C-type lectin domain-containing protein LINC00083 OS=Homo sapiens GN=LINC00083 PE=5 SV=1
tr|H7C0L5|H7C0L5_HUMAN	31.02	1	1	1		80072	Inter-alpha-trypsin inhibitor heavy chain H4 (Fragment) OS=Homo sapiens GN=ITIH4 PE=1 SV=1
sp|Q14624|ITIH4_HUMAN	31.02	1	1	1		103357	Inter-alpha-trypsin inhibitor heavy chain H4 OS=Homo sapiens GN=ITIH4 PE=1 SV=4
tr|B7ZKJ8|B7ZKJ8_HUMAN	31.02	1	1	1		103881	ITIH4 protein OS=Homo sapiens GN=ITIH4 PE=1 SV=1
sp|Q03181|PPARD_HUMAN	28.39	2	1	1		49903	Peroxisome proliferator-activated receptor delta OS=Homo sapiens GN=PPARD PE=1 SV=1
sp|Q07869|PPARA_HUMAN	28.39	1	1	1		52225	Peroxisome proliferator-activated receptor alpha OS=Homo sapiens GN=PPARA PE=1 SV=2
tr|G5EA42|G5EA42_HUMAN	26.47	2	1	1		34492	Tropomodulin 2 (Neuronal) isoform CRA_a OS=Homo sapiens GN=TMOD2 PE=1 SV=1
sp|Q9NZR1|TMOD2_HUMAN	26.47	2	1	1		39595	Tropomodulin-2 OS=Homo sapiens GN=TMOD2 PE=1 SV=1
tr|H0YMA2|H0YMA2_HUMAN	26.47	6	1	1		12399	Tropomodulin-2 (Fragment) OS=Homo sapiens GN=TMOD2 PE=1 SV=1
tr|Q5T3Q7|Q5T3Q7_HUMAN	26.43	1	1	1	Carbamidomethylation	233274	HEAT repeat-containing protein 1 OS=Homo sapiens GN=HEATR1 PE=1 SV=1
sp|Q9H583|HEAT1_HUMAN	26.43	1	1	1	Carbamidomethylation	242368	HEAT repeat-containing protein 1 OS=Homo sapiens GN=HEATR1 PE=1 SV=3
tr|A8MUF7|A8MUF7_HUMAN	45.3	11	1	1		9470	Hemoglobin subunit epsilon (Fragment) OS=Homo sapiens GN=HBE1 PE=1 SV=1
tr|E9PEW8|E9PEW8_HUMAN	45.3	10	1	1		11346	Hemoglobin subunit delta (Fragment) OS=Homo sapiens GN=HBD PE=1 SV=1
tr|E9PBW4|E9PBW4_HUMAN	45.3	7	1	1		15319	Hemoglobin subunit gamma-2 OS=Homo sapiens GN=HBG2 PE=1 SV=1
tr|E9PFT6|E9PFT6_HUMAN	45.3	7	1	1		15420	Hemoglobin subunit delta OS=Homo sapiens GN=HBD PE=1 SV=1
sp|P69891|HBG1_HUMAN	45.3	7	1	1		16140	Hemoglobin subunit gamma-1 OS=Homo sapiens GN=HBG1 PE=1 SV=2
sp|P02100|HBE_HUMAN	45.3	7	1	1		16203	Hemoglobin subunit epsilon OS=Homo sapiens GN=HBE1 PE=1 SV=2
sp|P02042|HBD_HUMAN	45.3	7	1	1		16055	Hemoglobin subunit delta OS=Homo sapiens GN=HBD PE=1 SV=2
sp|P69892|HBG2_HUMAN	45.3	7	1	1		16126	Hemoglobin subunit gamma-2 OS=Homo sapiens GN=HBG2 PE=1 SV=2
tr|A8MZB2|A8MZB2_HUMAN	37.9	5	1	1		18857	N-acetyltransferase 5 (ARD1 homolog S. cerevisiae) isoform CRA_a OS=Homo sapiens GN=NAA20 PE=1 SV=1
sp|P61599|NAA20_HUMAN	37.9	4	1	1		20368	N-alpha-acetyltransferase 20 OS=Homo sapiens GN=NAA20 PE=1 SV=1
sp|P10643|CO7_HUMAN	28.36	1	1	1	Carbamidomethylation	93518	Complement component C7 OS=Homo sapiens GN=C7 PE=1 SV=2
sp|Q6P3W7|SCYL2_HUMAN	26.36	2	1	1		103709	SCY1-like protein 2 OS=Homo sapiens GN=SCYL2 PE=1 SV=1
tr|A0A0U1RQQ9|A0A0U1RQQ9_HUMAN	26.36	2	1	1		104112	SCY1-like protein 2 OS=Homo sapiens GN=SCYL2 PE=1 SV=1
tr|A0A0A0MT56|A0A0A0MT56_HUMAN	23.2	3	1	1		24717	Cleavage stimulation factor subunit 2 (Fragment) OS=Homo sapiens GN=CSTF2 PE=1 SV=1
tr|E9PID8|E9PID8_HUMAN	23.2	2	1	1		46666	Cleavage stimulation factor subunit 2 OS=Homo sapiens GN=CSTF2 PE=1 SV=1
sp|P33240|CSTF2_HUMAN	23.2	1	1	1		60959	Cleavage stimulation factor subunit 2 OS=Homo sapiens GN=CSTF2 PE=1 SV=1
tr|E7EWR4|E7EWR4_HUMAN	23.2	1	1	1		62943	Cleavage stimulation factor subunit 2 OS=Homo sapiens GN=CSTF2 PE=1 SV=1
sp|Q9H0L4|CSTFT_HUMAN	23.2	1	1	1		64436	Cleavage stimulation factor subunit 2 tau variant OS=Homo sapiens GN=CSTF2T PE=1 SV=1
tr|B1ALB4|B1ALB4_HUMAN	22.9	1	1	1		84944	Protein SMG7 (Fragment) OS=Homo sapiens GN=SMG7 PE=1 SV=7
sp|Q92540|SMG7_HUMAN	22.9	1	1	1		127282	Protein SMG7 OS=Homo sapiens GN=SMG7 PE=1 SV=2
tr|E9PD50|E9PD50_HUMAN	22.9	1	1	1		130859	Protein SMG7 OS=Homo sapiens GN=SMG7 PE=1 SV=1
tr|K7ERJ6|K7ERJ6_HUMAN	22.2	1	1	1		99649	Zinc finger SWIM domain-containing protein 4 (Fragment) OS=Homo sapiens GN=ZSWIM4 PE=4 SV=1
sp|Q9H7M6|ZSWM4_HUMAN	22.2	1	1	1		110138	Zinc finger SWIM domain-containing protein 4 OS=Homo sapiens GN=ZSWIM4 PE=2 SV=3
sp|Q9Y2W1|TR150_HUMAN	22.11	1	1	1		108666	Thyroid hormone receptor-associated protein 3 OS=Homo sapiens GN=THRAP3 PE=1 SV=2
sp|Q9Y2I6|NINL_HUMAN	21.54	1	1	1		156343	Ninein-like protein OS=Homo sapiens GN=NINL PE=1 SV=2
tr|A0A087WUT6|A0A087WUT6_HUMAN	21.31	1	1	1		138681	Eukaryotic translation initiation factor 5B OS=Homo sapiens GN=EIF5B PE=1 SV=1
sp|O60841|IF2P_HUMAN	21.31	1	1	1		138827	Eukaryotic translation initiation factor 5B OS=Homo sapiens GN=EIF5B PE=1 SV=4
tr|H0YGW7|H0YGW7_HUMAN	21.09	2	1	1		67669	ATP-binding cassette sub-family F member 1 (Fragment) OS=Homo sapiens GN=ABCF1 PE=1 SV=1
sp|Q8NE71|ABCF1_HUMAN	21.09	1	1	1		95926	ATP-binding cassette sub-family F member 1 OS=Homo sapiens GN=ABCF1 PE=1 SV=2
tr|A0A0A0MRF6|A0A0A0MRF6_HUMAN	20.85	0	1	1		453496	A-kinase anchor protein 9 OS=Homo sapiens GN=AKAP9 PE=1 SV=1
sp|Q99996|AKAP9_HUMAN	20.85	0	1	1		453670	A-kinase anchor protein 9 OS=Homo sapiens GN=AKAP9 PE=1 SV=3
tr|H7BYL6|H7BYL6_HUMAN	20.85	1	1	1		204026	A-kinase anchor protein 9 (Fragment) OS=Homo sapiens GN=AKAP9 PE=1 SV=1
sp|Q12802|AKP13_HUMAN	20.79	0	1	1		307550	A-kinase anchor protein 13 OS=Homo sapiens GN=AKAP13 PE=1 SV=2
tr|A0A087WTD7|A0A087WTD7_HUMAN	20.79	1	1	1		161184	A-kinase anchor protein 13 OS=Homo sapiens GN=AKAP13 PE=1 SV=1
tr|A8MYJ1|A8MYJ1_HUMAN	20.79	1	1	1		161840	A-kinase anchor protein 13 OS=Homo sapiens GN=AKAP13 PE=1 SV=3
sp|O94805|ACL6B_HUMAN	20.62	2	1	1		46877	Actin-like protein 6B OS=Homo sapiens GN=ACTL6B PE=1 SV=1
sp|P02751|FINC_HUMAN	41.9	0	1	1	Carbamidomethylation	262622	Fibronectin OS=Homo sapiens GN=FN1 PE=1 SV=4
sp|P23527|H2B1O_HUMAN	41.25	13	1	1		13906	Histone H2B type 1-O OS=Homo sapiens GN=HIST1H2BO PE=1 SV=3
sp|Q7LBC6|KDM3B_HUMAN	35.76	1	1	1		191580	Lysine-specific demethylase 3B OS=Homo sapiens GN=KDM3B PE=1 SV=2
sp|P29622|KAIN_HUMAN	29.52	2	1	1		48542	Kallistatin OS=Homo sapiens GN=SERPINA4 PE=1 SV=3
sp|Q9Y5B9|SP16H_HUMAN	26.63	1	1	1		119914	FACT complex subunit SPT16 OS=Homo sapiens GN=SUPT16H PE=1 SV=1

## Sheet: control_peps
Protein Accession	Peptide	Unique	-10lgP	Mass	ppm	m/z	z	RT	#Spec	PTM
sp|P02771|FETA_HUMAN	R.SC(+57.02)GLFQKLGEYYLQNAFLVAYTK.K	Y	91.88	2712.36	22.8	905.149	3	37.22	5	Carbamidomethylation
tr|J3KMX3|J3KMX3_HUMAN	R.SC(+57.02)GLFQKLGEYYLQNAFLVAYTK.K	Y	91.19	2712.36	9.5	905.136	3	37.54	4	Carbamidomethylation
sp|P69905|HBA_HUMAN	K.TYFPHFDLSHGSAQVK.G	Y	82.84	1832.88	19.2	917.467	2	22.31	6
tr|A0A0C4DGB6|A0A0C4DGB6_HUMAN	T.EC(+57.02)C(+57.02)HGDLLEC(+57.02)ADDRADLAK.Y	N	78.82	2246.94	12	749.995	3	17.48	3	Carbamidomethylation
sp|P02768|ALBU_HUMAN	T.EC(+57.02)C(+57.02)HGDLLEC(+57.02)ADDRADLAK.Y	N	78.82	2246.94	12	749.995	3	17.48	3	Carbamidomethylation
tr|G3V1N2|G3V1N2_HUMAN	K.TYFPHFDLSHGSAQVK.G	Y	76.73	1832.88	17.2	917.465	2	22.92	2
sp|P01023|A2MG_HUMAN	K.ALLAYAFALAGNQDK(+42.01).R	Y	75.97	1606.84	11.8	804.434	2	30.54	4	Acetylation (K)
tr|A0A0C4DGB6|A0A0C4DGB6_HUMAN	K.KVPQVSTPTLVEVSR.N	N	75.58	1638.93	7.9	547.322	3	20.8	312
sp|P02768|ALBU_HUMAN	K.KVPQVSTPTLVEVSR.N	N	75.58	1638.93	7.9	547.322	3	20.8	312
sp|P02774|VTDB_HUMAN	K.GQELC(+57.02)ADYSENTFTEYKKK.L	Y	75.4	2310.05	0	578.519	4	17.15	2	Carbamidomethylation
tr|D6RF35|D6RF35_HUMAN	K.GQELC(+57.02)ADYSENTFTEYKKK.L	Y	75.4	2310.05	0	578.519	4	17.15	2	Carbamidomethylation
sp|P69905|HBA_HUMAN	K.AAWGKVGAHAGEYGAEALER.M	Y	74.26	2042	10	681.68	3	18.37	3
sp|P01023|A2MG_HUMAN	R.Q(-17.03)TVSWAVTPK.S	Y	72.85	1098.57	0.9	550.293	2	21.77	1	Pyro-glu from Q
tr|Q5VY30|Q5VY30_HUMAN	R.Q(-17.03)RQEELC(+57.02)LAR.Q	Y	72.21	1284.62	5.5	643.323	2	15.93	1	Pyro-glu from Q; Carbamidomethylation
tr|A0A0C4DGV7|A0A0C4DGV7_HUMAN	R.Q(-17.03)RQEELC(+57.02)LAR.Q	Y	72.21	1284.62	5.5	643.323	2	15.93	1	Pyro-glu from Q; Carbamidomethylation
sp|P02753|RET4_HUMAN	R.Q(-17.03)RQEELC(+57.02)LAR.Q	Y	72.21	1284.62	5.5	643.323	2	15.93	1	Pyro-glu from Q; Carbamidomethylation
tr|A0A087WW43|A0A087WW43_HUMAN	K.KGHVSFKPSLDQQR.S	Y	71.85	1625.86	4.3	542.964	3	12.3	2
tr|E7ET33|E7ET33_HUMAN	K.KGHVSFKPSLDQQR.S	Y	71.85	1625.86	4.3	542.964	3	12.3	2
sp|Q06033|ITIH3_HUMAN	K.KGHVSFKPSLDQQR.S	Y	71.85	1625.86	4.3	542.964	3	12.3	2
tr|A0A0C4DGB6|A0A0C4DGB6_HUMAN	R.FPKAEFAEVSK(+42.01)LVTDLTK.V	N	71.7	2064.11	21.6	689.06	3	33.38	3	Acetylation (K)
sp|P02768|ALBU_HUMAN	R.FPKAEFAEVSK(+42.01)LVTDLTK.V	N	71.7	2064.11	21.6	689.06	3	33.38	3	Acetylation (K)
sp|P02795|MT2_HUMAN	K.SC(+57.02)C(+57.02)SC(+57.02)C(+57.02)PVGC(+57.02)AK.C	Y	71.69	1444.5	15.2	723.269	2	7.29	4	Carbamidomethylation
tr|A0A087WWT3|A0A087WWT3_HUMAN	K.KVPQVSTPTLVEVSR.N	N	71.41	1638.93	6.3	547.321	3	21.22	379
tr|E7EQB2|E7EQB2_HUMAN	R.C(+57.02)LAENAGDVAFVKDVTVLQNTDGNN(+.98)NEAWAK.D	Y	70.32	3363.57	27.7	841.923	4	22.65	1	Carbamidomethylation; Deamidation (NQ)
tr|E7ER44|E7ER44_HUMAN	R.C(+57.02)LAENAGDVAFVKDVTVLQNTDGNN(+.98)NEAWAK.D	Y	70.32	3363.57	27.7	841.923	4	22.65	1	Carbamidomethylation; Deamidation (NQ)
sp|P02788|TRFL_HUMAN	R.C(+57.02)LAENAGDVAFVKDVTVLQNTDGNN(+.98)NEAWAK.D	Y	70.32	3363.57	27.7	841.923	4	22.65	1	Carbamidomethylation; Deamidation (NQ)
sp|P02771|FETA_HUMAN	K.RSC(+57.02)GLFQKLGEYYLQNAFLVAYTK.K	Y	69.57	2868.46	6.5	957.168	3	34.79	1	Carbamidomethylation
tr|J3KMX3|J3KMX3_HUMAN	K.RSC(+57.02)GLFQKLGEYYLQNAFLVAYTK.K	Y	69.57	2868.46	6.5	957.168	3	34.79	1	Carbamidomethylation
sp|P01023|A2MG_HUMAN	K.ALLAYAFALAGNQDK(+42.01)R.K	Y	68.53	1762.94	9.5	588.658	3	28.92	2	Acetylation (K)
tr|A0A087WW43|A0A087WW43_HUMAN	K.SFSGKKGHVSFKPSLDQQR.S	Y	68.33	2132.11	4.9	534.038	4	13.12	2
tr|E7ET33|E7ET33_HUMAN	K.SFSGKKGHVSFKPSLDQQR.S	Y	68.33	2132.11	4.9	534.038	4	13.12	2
sp|Q06033|ITIH3_HUMAN	K.SFSGKKGHVSFKPSLDQQR.S	Y	68.33	2132.11	4.9	534.038	4	13.12	2
sp|P00747|PLMN_HUMAN	K.KC(+57.02)QSWSSMTPHR.H	Y	67.74	1503.67	-2.4	502.23	3	12.33	1	Carbamidomethylation
sp|P01023|A2MG_HUMAN	K.MVSGFIPLKPTVK.M	N	67.65	1415.82	13.4	708.927	2	24.34	3
tr|A0A0C4DGB6|A0A0C4DGB6_HUMAN	K.VPQVSTPTLVEVSR.N	N	67.42	1510.84	11.9	756.434	2	22.81	4
sp|P02768|ALBU_HUMAN	K.VPQVSTPTLVEVSR.N	N	67.42	1510.84	11.9	756.434	2	22.81	4
tr|A0A087WWT3|A0A087WWT3_HUMAN	K.VPQVSTPTLVEVSR.N	N	67.42	1510.84	11.9	756.434	2	22.81	4
sp|P02771|FETA_HUMAN	K.LGEYYLQNAFLVAYTK.K	Y	67.07	1891.97	7.7	947	2	31.35	4
tr|J3KMX3|J3KMX3_HUMAN	K.LGEYYLQNAFLVAYTK.K	Y	67.07	1891.97	7.7	947	2	31.35	4
sp|P02765|FETUA_HUMAN	K.C(+57.02)NLLAEKQYGFC(+57.02)K.A	Y	66.18	1629.76	15.9	815.902	2	18.43	4	Carbamidomethylation
sp|P69905|HBA_HUMAN	K.AAWGKVGAHAGEYGAEALERMFLSFPTTK.T	Y	65.64	3094.53	15.6	774.653	4	34.33	2
tr|Q5VY30|Q5VY30_HUMAN	K.MKYWGVASFLQK.G	Y	65.61	1456.75	4.2	729.387	2	26.89	2
tr|A0A0C4DGV7|A0A0C4DGV7_HUMAN	K.MKYWGVASFLQK.G	Y	65.61	1456.75	4.2	729.387	2	26.89	2
sp|P02753|RET4_HUMAN	K.MKYWGVASFLQK.G	Y	65.61	1456.75	4.2	729.387	2	26.89	2
tr|Q5VY30|Q5VY30_HUMAN	R.QRQEELCLAR.Q	Y	65.42	1244.63	6.3	623.326	2	14.13	1
tr|A0A0C4DGV7|A0A0C4DGV7_HUMAN	R.QRQEELCLAR.Q	Y	65.42	1244.63	6.3	623.326	2	14.13	1
sp|P02753|RET4_HUMAN	R.QRQEELCLAR.Q	Y	65.42	1244.63	6.3	623.326	2	14.13	1
tr|E7EQB2|E7EQB2_HUMAN	R.C(+57.02)LAENAGDVAFVKDVTVLQNTDGNNNEAWAK.D	Y	65.38	3362.58	23.1	841.673	4	22.77	2	Carbamidomethylation
tr|E7ER44|E7ER44_HUMAN	R.C(+57.02)LAENAGDVAFVKDVTVLQNTDGNNNEAWAK.D	Y	65.38	3362.58	23.1	841.673	4	22.77	2	Carbamidomethylation
sp|P02788|TRFL_HUMAN	R.C(+57.02)LAENAGDVAFVKDVTVLQNTDGNNNEAWAK.D	Y	65.38	3362.58	23.1	841.673	4	22.77	2	Carbamidomethylation
sp|P69905|HBA_HUMAN	K.VGAHAGEYGAEALER.M	Y	65.02	1528.73	4.5	510.585	3	14.28	3
tr|A0A0C4DGB6|A0A0C4DGB6_HUMAN	K.SLHTLFGDKLC(+57.02)TVATLRETYGEMADC(+57.02)C(+57.02)AK.Q	Y	65	3346.55	14.6	1116.54	3	29.06	1	Carbamidomethylation
sp|P02768|ALBU_HUMAN	K.SLHTLFGDKLC(+57.02)TVATLRETYGEMADC(+57.02)C(+57.02)AK.Q	Y	65	3346.55	14.6	1116.54	3	29.06	1	Carbamidomethylation
tr|C9JV77|C9JV77_HUMAN	K.C(+57.02)NLLAEKQYGFC(+57.02)K.A	Y	64.75	1629.76	2.9	815.892	2	18.67	3	Carbamidomethylation
sp|P02774|VTDB_HUMAN	K.LC(+57.02)DNLSTKNSK.F	Y	64.27	1278.62	8.6	640.325	2	7.33	7	Carbamidomethylation
tr|D6RF35|D6RF35_HUMAN	K.LC(+57.02)DNLSTKNSK.F	Y	64.27	1278.62	8.6	640.325	2	7.33	7	Carbamidomethylation
sp|P04732|MT1E_HUMAN	K.SC(+57.02)C(+57.02)SC(+57.02)C(+57.02)PVGC(+57.02)AK.C	N	64.05	1444.5	4.3	723.262	2	8.97	2	Carbamidomethylation
sp|P02771|FETA_HUMAN	R.VAKGYQELLEK.C	Y	63.27	1276.7	10.2	639.365	2	16.23	3
sp|P01024|CO3_HUMAN	K.KGYTQQLAFR.Q	Y	62.59	1210.65	1.6	606.331	2	15.73	2
sp|P02765|FETUA_HUMAN	K.C(+57.02)DSSPDSAEDVRK.V	Y	62.51	1464.62	-0.3	489.212	3	7.62	3	Carbamidomethylation
sp|P23142|FBLN1_HUMAN	R.GYQLSDVDGVTC(+57.02)EDIDEC(+57.02)ALPTGGHIC(+57.02)SYR.C	Y	62.34	3386.45	19.4	1129.85	3	25.51	2	Carbamidomethylation
tr|B1AHL2|B1AHL2_HUMAN	R.GYQLSDVDGVTC(+57.02)EDIDEC(+57.02)ALPTGGHIC(+57.02)SYR.C	Y	62.34	3386.45	19.4	1129.85	3	25.51	2	Carbamidomethylation
tr|A0A0C4DGB6|A0A0C4DGB6_HUMAN	L.GEYK(+42.01)FQNALLVR.Y	N	62.04	1478.79	6.1	740.406	2	26.19	11	Acetylation (K)
sp|P02768|ALBU_HUMAN	L.GEYK(+42.01)FQNALLVR.Y	N	62.04	1478.79	6.1	740.406	2	26.19	11	Acetylation (K)
tr|A0A087WWT3|A0A087WWT3_HUMAN	L.GEYK(+42.01)FQNALLVR.Y	N	62.04	1478.79	6.1	740.406	2	26.19	11	Acetylation (K)
tr|Q5T985|Q5T985_HUMAN	K.FYNQVSTPLLR.N	Y	61.82	1336.71	13.3	669.373	2	22.73	4
tr|A0A087WTE1|A0A087WTE1_HUMAN	K.FYNQVSTPLLR.N	Y	61.82	1336.71	13.3	669.373	2	22.73	4
sp|P19823|ITIH2_HUMAN	K.FYNQVSTPLLR.N	Y	61.82	1336.71	13.3	669.373	2	22.73	4
tr|A0A0C4DGB6|A0A0C4DGB6_HUMAN	R.VTKC(+57.02)C(+57.02)TESLVNR.R	N	61.81	1465.7	3.6	733.861	2	11.26	2	Carbamidomethylation
sp|P02768|ALBU_HUMAN	R.VTKC(+57.02)C(+57.02)TESLVNR.R	N	61.81	1465.7	3.6	733.861	2	11.26	2	Carbamidomethylation
tr|A0A087WWT3|A0A087WWT3_HUMAN	R.VTKC(+57.02)C(+57.02)TESLVNR.R	N	61.81	1465.7	3.6	733.861	2	11.26	2	Carbamidomethylation
sp|P02656|APOC3_HUMAN	K.DALSSVQESQVAQQAR.G	Y	61.81	1715.84	10.1	858.938	2	16.28	2
tr|B0YIW2|B0YIW2_HUMAN	K.DALSSVQESQVAQQAR.G	Y	61.81	1715.84	10.1	858.938	2	16.28	2
tr|A0A0C4DGB6|A0A0C4DGB6_HUMAN	T.EC(+57.02)C(+57.02)HGDLLEC(+57.02)ADDRADLAKYIC(+57.02)ENQDSISSK.L	N	61.71	3671.56	7.9	918.904	4	24.25	2	Carbamidomethylation
sp|P02768|ALBU_HUMAN	T.EC(+57.02)C(+57.02)HGDLLEC(+57.02)ADDRADLAKYIC(+57.02)ENQDSISSK.L	N	61.71	3671.56	7.9	918.904	4	24.25	2	Carbamidomethylation
sp|P02765|FETUA_HUMAN	K.C(+57.02)DSSPDSAEDVR.K	Y	61.69	1336.52	9.8	669.274	2	6	13	Carbamidomethylation
tr|A0A0C4DGB6|A0A0C4DGB6_HUMAN	K.C(+57.02)ASLQKFGER.A	N	60.78	1194.58	6.8	598.302	2	11.4	11	Carbamidomethylation
sp|P02768|ALBU_HUMAN	K.C(+57.02)ASLQKFGER.A	N	60.78	1194.58	6.8	598.302	2	11.4	11	Carbamidomethylation
tr|E7EQB2|E7EQB2_HUMAN	K.C(+57.02)GLVPVLAENYK.S	Y	60.39	1361.7	3.7	681.861	2	24.87	2	Carbamidomethylation
tr|E7ER44|E7ER44_HUMAN	K.C(+57.02)GLVPVLAENYK.S	Y	60.39	1361.7	3.7	681.861	2	24.87	2	Carbamidomethylation
sp|P02788|TRFL_HUMAN	K.C(+57.02)GLVPVLAENYK.S	Y	60.39	1361.7	3.7	681.861	2	24.87	2	Carbamidomethylation
tr|D6RBJ7|D6RBJ7_HUMAN	K.LC(+57.02)DNLSTKNSK.F	Y	60.33	1278.62	2.4	640.321	2	8.97	3	Carbamidomethylation
tr|A0A0C4DGB6|A0A0C4DGB6_HUMAN	V.RYTK(+42.01)KVPQVSTPTLVEVSR.N	N	60.05	2229.25	38	1115.67	2	21.12	1	Acetylation (K)
sp|P02768|ALBU_HUMAN	V.RYTK(+42.01)KVPQVSTPTLVEVSR.N	N	60.05	2229.25	38	1115.67	2	21.12	1	Acetylation (K)
tr|E7EQB2|E7EQB2_HUMAN	K.SCHTAVDR.T	Y	59.98	887.392	-3.6	444.702	2	4.39	3
tr|E7ER44|E7ER44_HUMAN	K.SCHTAVDR.T	Y	59.98	887.392	-3.6	444.702	2	4.39	3
sp|P02788|TRFL_HUMAN	K.SCHTAVDR.T	Y	59.98	887.392	-3.6	444.702	2	4.39	3
tr|Q5T985|Q5T985_HUMAN	K.VQFELHYQEVKWR.K	Y	59.83	1760.9	6	587.977	3	22.43	3
tr|A0A087WTE1|A0A087WTE1_HUMAN	K.VQFELHYQEVKWR.K	Y	59.83	1760.9	6	587.977	3	22.43	3
sp|P19823|ITIH2_HUMAN	K.VQFELHYQEVKWR.K	Y	59.83	1760.9	6	587.977	3	22.43	3
tr|A0A0C4DGB6|A0A0C4DGB6_HUMAN	K.AEFAEVSK(+42.01)LVTDLTK.V	N	59.67	1691.9	29	846.981	2	31.33	20	Acetylation (K)
sp|P02768|ALBU_HUMAN	K.AEFAEVSK(+42.01)LVTDLTK.V	N	59.67	1691.9	29	846.981	2	31.33	20	Acetylation (K)
tr|J3KMX3|J3KMX3_HUMAN	R.VAKGYQELLEK.C	Y	59.54	1276.7	1.5	639.36	2	16.57	3
tr|Q5VY30|Q5VY30_HUMAN	R.QRQEELC(+57.02)LAR.Q	Y	59.2	1301.65	10.5	651.84	2	12.95	2	Carbamidomethylation
tr|A0A0C4DGV7|A0A0C4DGV7_HUMAN	R.QRQEELC(+57.02)LAR.Q	Y	59.2	1301.65	10.5	651.84	2	12.95	2	Carbamidomethylation
sp|P02753|RET4_HUMAN	R.QRQEELC(+57.02)LAR.Q	Y	59.2	1301.65	10.5	651.84	2	12.95	2	Carbamidomethylation
sp|P23142|FBLN1_HUMAN	R.C(+57.02)C(+57.02)HC(+57.02)C(+57.02)LLGR.A	Y	58.94	1234.48	7.3	618.253	2	11.5	2	Carbamidomethylation
tr|B1AHL2|B1AHL2_HUMAN	R.C(+57.02)C(+57.02)HC(+57.02)C(+57.02)LLGR.A	Y	58.94	1234.48	7.3	618.253	2	11.5	2	Carbamidomethylation
sp|P02452|CO1A1_HUMAN	K.NSVAYMDQQTGNLKK.A	Y	58.49	1695.83	5.4	848.924	2	13.94	1
tr|A0A0C4DGB6|A0A0C4DGB6_HUMAN	K.SLHTLFGDK(+42.01)LC(+57.02)TVATLRETYGEM(+15.99)ADC(+57.02)C(+57.02)AK.Q	Y	58.33	3404.55	9.6	852.153	4	29	1	Acetylation (K); Carbamidomethylation; Oxidation (M)
sp|P02768|ALBU_HUMAN	K.SLHTLFGDK(+42.01)LC(+57.02)TVATLRETYGEM(+15.99)ADC(+57.02)C(+57.02)AK.Q	Y	58.33	3404.55	9.6	852.153	4	29	1	Acetylation (K); Carbamidomethylation; Oxidation (M)
tr|A0A0J9YY65|A0A0J9YY65_HUMAN	R.LC(+57.02)QDLGPGAFR.L	Y	58.13	1232.6	8.2	617.311	2	18.81	4	Carbamidomethylation
tr|C9JMH6|C9JMH6_HUMAN	R.LC(+57.02)QDLGPGAFR.L	Y	58.13	1232.6	8.2	617.311	2	18.81	4	Carbamidomethylation
tr|A0A0G2JPA8|A0A0G2JPA8_HUMAN	R.LC(+57.02)QDLGPGAFR.L	Y	58.13	1232.6	8.2	617.311	2	18.81	4	Carbamidomethylation
sp|P08697|A2AP_HUMAN	R.LC(+57.02)QDLGPGAFR.L	Y	58.13	1232.6	8.2	617.311	2	18.81	4	Carbamidomethylation
sp|P02774|VTDB_HUMAN	K.GQELC(+57.02)ADYSENTFTEYKK.K	Y	57.78	2181.95	10.6	728.332	3	18.13	2	Carbamidomethylation
tr|D6RF35|D6RF35_HUMAN	K.GQELC(+57.02)ADYSENTFTEYKK.K	Y	57.78	2181.95	10.6	728.332	3	18.13	2	Carbamidomethylation
tr|A0A087WW43|A0A087WW43_HUMAN	K.GHVSFKPSLDQQR.S	Y	57.64	1497.77	-0.3	500.263	3	14.27	2
tr|E7ET33|E7ET33_HUMAN	K.GHVSFKPSLDQQR.S	Y	57.64	1497.77	-0.3	500.263	3	14.27	2
sp|Q06033|ITIH3_HUMAN	K.GHVSFKPSLDQQR.S	Y	57.64	1497.77	-0.3	500.263	3	14.27	2
tr|A0A0C4DGB6|A0A0C4DGB6_HUMAN	K.C(+57.02)C(+57.02)TESLVNR.R	N	57.61	1137.49	4.8	569.755	2	10.75	7	Carbamidomethylation
sp|P02768|ALBU_HUMAN	K.C(+57.02)C(+57.02)TESLVNR.R	N	57.61	1137.49	4.8	569.755	2	10.75	7	Carbamidomethylation
tr|B1AHN3|B1AHN3_HUMAN	R.C(+57.02)C(+57.02)HC(+57.02)C(+57.02)LLGR.A	Y	57.52	1234.48	1.5	618.25	2	12.08	2	Carbamidomethylation
tr|B1AHM8|B1AHM8_HUMAN	R.C(+57.02)C(+57.02)HC(+57.02)C(+57.02)LLGR.A	Y	57.52	1234.48	1.5	618.25	2	12.08	2	Carbamidomethylation
tr|H7C1M6|H7C1M6_HUMAN	R.C(+57.02)C(+57.02)HC(+57.02)C(+57.02)LLGR.A	Y	57.52	1234.48	1.5	618.25	2	12.08	2	Carbamidomethylation
tr|B1AHM7|B1AHM7_HUMAN	R.C(+57.02)C(+57.02)HC(+57.02)C(+57.02)LLGR.A	Y	57.52	1234.48	1.5	618.25	2	12.08	2	Carbamidomethylation
tr|B1AHM9|B1AHM9_HUMAN	R.C(+57.02)C(+57.02)HC(+57.02)C(+57.02)LLGR.A	Y	57.52	1234.48	1.5	618.25	2	12.08	2	Carbamidomethylation
tr|A0A087WWT3|A0A087WWT3_HUMAN	K.SLHTLFGDKLC(+57.02)TVATLRETYGEMADC(+57.02)C(+57.02)AK.Q	Y	56.42	3346.55	-3.4	837.641	4	29.39	1	Carbamidomethylation
tr|H7C013|H7C013_HUMAN	K.SLHTLFGDKLC(+57.02)TVATLRETYGEMADC(+57.02)C(+57.02)AK.Q	Y	56.42	3346.55	-3.4	837.641	4	29.39	1	Carbamidomethylation
tr|A0A087WWT3|A0A087WWT3_HUMAN	K.C(+57.02)C(+57.02)TESLVNR.R	N	55.27	1137.49	1.2	569.753	2	11.33	5	Carbamidomethylation
tr|Q5T987|Q5T987_HUMAN	K.VQFELHYQEVKWR.K	Y	54.63	1760.9	0	587.974	3	22.68	2
tr|F8W6P5|F8W6P5_HUMAN	R.LLVVYPWTQR.F	N	54.31	1273.72	3.8	637.869	2	27.62	5
sp|P68871|HBB_HUMAN	R.LLVVYPWTQR.F	N	54.31	1273.72	3.8	637.869	2	27.62	5
sp|P36955|PEDF_HUMAN	K.ITGKPIKLTQVEHR.A	Y	53.71	1618.95	5.1	540.661	3	13.62	1
tr|A0A087WWT3|A0A087WWT3_HUMAN	K.SLHTLFGDK(+42.01)LC(+57.02)TVATLRETYGEM(+15.99)ADC(+57.02)C(+57.02)AK.Q	Y	53.02	3404.55	-3.2	852.142	4	29.34	1	Acetylation (K); Carbamidomethylation; Oxidation (M)
tr|H7C013|H7C013_HUMAN	K.SLHTLFGDK(+42.01)LC(+57.02)TVATLRETYGEM(+15.99)ADC(+57.02)C(+57.02)AK.Q	Y	53.02	3404.55	-3.2	852.142	4	29.34	1	Acetylation (K); Carbamidomethylation; Oxidation (M)
sp|O95497|VNN1_HUMAN	K.DLC(+57.02)C(+57.02)HLSYK.M	Y	52.74	1194.52	9.1	598.271	2	13.74	2	Carbamidomethylation
tr|A0A0G2JL54|A0A0G2JL54_HUMAN	K.ITQVLHFTKDVK.A	Y	52.7	1427.81	-2.6	714.912	2	16.19	2
tr|A0A140TA29|A0A140TA29_HUMAN	K.ITQVLHFTKDVK.A	Y	52.7	1427.81	-2.6	714.912	2	16.19	2
tr|A0A140TA44|A0A140TA44_HUMAN	K.ITQVLHFTKDVK.A	Y	52.7	1427.81	-2.6	714.912	2	16.19	2
tr|A0A140TA32|A0A140TA32_HUMAN	K.ITQVLHFTKDVK.A	Y	52.7	1427.81	-2.6	714.912	2	16.19	2
tr|A0A140TA49|A0A140TA49_HUMAN	K.ITQVLHFTKDVK.A	Y	52.7	1427.81	-2.6	714.912	2	16.19	2
tr|F5GXS0|F5GXS0_HUMAN	K.ITQVLHFTKDVK.A	Y	52.7	1427.81	-2.6	714.912	2	16.19	2
tr|A0A0G2JPR0|A0A0G2JPR0_HUMAN	K.ITQVLHFTKDVK.A	Y	52.7	1427.81	-2.6	714.912	2	16.19	2
sp|P0C0L4|CO4A_HUMAN	K.ITQVLHFTKDVK.A	Y	52.7	1427.81	-2.6	714.912	2	16.19	2
sp|P0C0L5|CO4B_HUMAN	K.ITQVLHFTKDVK.A	Y	52.7	1427.81	-2.6	714.912	2	16.19	2
sp|P01042|KNG1_HUMAN	K.RPPGFSPFR.S	Y	52.42	1059.56	8.6	530.793	2	17.41	8
sp|P02774|VTDB_HUMAN	R.GRDYEKN(+.98)KVC(+57.02)K.E	Y	52.38	1396.68	-2.6	466.565	3	5.83	2	Deamidation (NQ); Carbamidomethylation
tr|D6RF35|D6RF35_HUMAN	R.GRDYEKN(+.98)KVC(+57.02)K.E	Y	52.38	1396.68	-2.6	466.565	3	5.83	2	Deamidation (NQ); Carbamidomethylation
tr|D6RBJ7|D6RBJ7_HUMAN	R.GRDYEKN(+.98)KVC(+57.02)K.E	Y	52.38	1396.68	-2.6	466.565	3	5.83	2	Deamidation (NQ); Carbamidomethylation
tr|Q5T985|Q5T985_HUMAN	K.IQPSGGTNINEALLR.A	Y	52.13	1581.85	3.5	791.934	2	20.9	1
tr|A0A087WTE1|A0A087WTE1_HUMAN	K.IQPSGGTNINEALLR.A	Y	52.13	1581.85	3.5	791.934	2	20.9	1
sp|P19823|ITIH2_HUMAN	K.IQPSGGTNINEALLR.A	Y	52.13	1581.85	3.5	791.934	2	20.9	1
tr|A0A0C4DGB6|A0A0C4DGB6_HUMAN	K.K(+42.01)VPQ(+.98)VSTPTLVEVSR.N	N	51.89	1681.92	24.3	841.99	2	22.75	7	Acetylation (K); Deamidation (NQ)
sp|P02768|ALBU_HUMAN	K.K(+42.01)VPQ(+.98)VSTPTLVEVSR.N	N	51.89	1681.92	24.3	841.99	2	22.75	7	Acetylation (K); Deamidation (NQ)
sp|P00747|PLMN_HUMAN	M.HFC(+57.02)GGTLISPE(-.98).W	Y	51.23	1215.57	32.3	608.812	2	16.18	3	Carbamidomethylation; Amidation
tr|F8W6P5|F8W6P5_HUMAN	N.VDEVGGEALGR.L	Y	51.13	1100.55	1.6	551.281	2	13.38	2
sp|P68871|HBB_HUMAN	N.VDEVGGEALGR.L	Y	51.13	1100.55	1.6	551.281	2	13.38	2
tr|C9JV37|C9JV37_HUMAN	R.SGIEC(+57.02)QLWR.S	Y	51.11	1147.54	7	574.784	2	20.36	1	Carbamidomethylation
tr|E9PIT3|E9PIT3_HUMAN	R.SGIEC(+57.02)QLWR.S	Y	51.11	1147.54	7	574.784	2	20.36	1	Carbamidomethylation
sp|P00734|THRB_HUMAN	R.SGIEC(+57.02)QLWR.S	Y	51.11	1147.54	7	574.784	2	20.36	1	Carbamidomethylation
tr|A0A0C4DGB6|A0A0C4DGB6_HUMAN	K.YIC(+57.02)EN(+.98)QDSISSK.L	N	50.25	1443.62	5.3	722.821	2	12.2	5	Carbamidomethylation; Deamidation (NQ)
sp|P02768|ALBU_HUMAN	K.YIC(+57.02)EN(+.98)QDSISSK.L	N	50.25	1443.62	5.3	722.821	2	12.2	5	Carbamidomethylation; Deamidation (NQ)
sp|P01023|A2MG_HUMAN	K.LPPNVVEESAR.A	Y	49.79	1209.64	5.2	605.828	2	15.87	1
sp|P69905|HBA_HUMAN	K.VGAHAGEYGAEALERMFLSFPTTK.T	Y	49.54	2581.26	11.7	861.438	3	34.15	2
tr|E7EQB2|E7EQB2_HUMAN	R.YYGYTGAFR.C	N	49.53	1096.5	5.8	549.259	2	17.13	4
tr|E7ER44|E7ER44_HUMAN	R.YYGYTGAFR.C	N	49.53	1096.5	5.8	549.259	2	17.13	4
sp|P02788|TRFL_HUMAN	R.YYGYTGAFR.C	N	49.53	1096.5	5.8	549.259	2	17.13	4
sp|P02787|TRFE_HUMAN	G.YYGYTGAFR.C	N	49.53	1096.5	5.8	549.259	2	17.13	4
sp|P01023|A2MG_HUMAN	R.QTVSWAVTPK.S	Y	48.76	1115.6	6.5	558.81	2	18.11	4
tr|A0A087WWT3|A0A087WWT3_HUMAN	K.K(+42.01)VPQ(+.98)VSTPTLVEVSR.N	N	48.48	1681.92	10	841.978	2	23.05	4	Acetylation (K); Deamidation (NQ)
sp|P02787|TRFE_HUMAN	K.SCHTGLGR.S	Y	48.47	829.386	-6	415.698	2	6.21	1
tr|C9JVG0|C9JVG0_HUMAN	K.SCHTGLGR.S	Y	48.47	829.386	-6	415.698	2	6.21	1
tr|A0A0C4DGB6|A0A0C4DGB6_HUMAN	K.YICENQDSISSK.L	N	48.45	1385.61	3.3	693.816	2	13.09	2
sp|P02768|ALBU_HUMAN	K.YICENQDSISSK.L	N	48.45	1385.61	3.3	693.816	2	13.09	2
sp|P69905|HBA_HUMAN	K.LRVDPVNFK.L	Y	48.43	1086.62	1.2	544.317	2	18.8	2
tr|G3V1N2|G3V1N2_HUMAN	K.LRVDPVNFK.L	Y	48.43	1086.62	1.2	544.317	2	18.8	2
sp|P02008|HBAZ_HUMAN	I.LRVDPVNFK.L	Y	48.43	1086.62	1.2	544.317	2	18.8	2
sp|P02749|APOH_HUMAN	K.VSFFC(+57.02)KNKEK.K	Y	48.43	1285.65	8.5	643.837	2	11.55	2	Carbamidomethylation
sp|P02787|TRFE_HUMAN	K.SC(+57.02)HTGLGR.S	Y	48.15	886.408	-1.5	444.211	2	5.82	5	Carbamidomethylation
tr|C9JVG0|C9JVG0_HUMAN	K.SC(+57.02)HTGLGR.S	Y	48.15	886.408	-1.5	444.211	2	5.82	5	Carbamidomethylation
tr|H7C5E8|H7C5E8_HUMAN	G.YYGYTGAFR.C	N	48.01	1096.5	1	549.257	2	17.26	4
tr|E7EQB2|E7EQB2_HUMAN	K.KSCHTAVDR.T	Y	47.61	1015.49	-3.8	508.749	2	2.74	1
tr|E7ER44|E7ER44_HUMAN	K.KSCHTAVDR.T	Y	47.61	1015.49	-3.8	508.749	2	2.74	1
sp|P02788|TRFL_HUMAN	K.KSCHTAVDR.T	Y	47.61	1015.49	-3.8	508.749	2	2.74	1
tr|A0A0C4DGB6|A0A0C4DGB6_HUMAN	K.CASLQKFGER.A	N	47.35	1137.56	4.5	569.79	2	12.67	2
sp|P02768|ALBU_HUMAN	K.CASLQKFGER.A	N	47.35	1137.56	4.5	569.79	2	12.67	2
sp|P02774|VTDB_HUMAN	K.LC(+57.02)DNLSTKN(+.98)SK.F	Y	47.01	1279.61	3.6	640.813	2	9.37	1	Carbamidomethylation; Deamidation (NQ)
tr|D6RF35|D6RF35_HUMAN	K.LC(+57.02)DNLSTKN(+.98)SK.F	Y	47.01	1279.61	3.6	640.813	2	9.37	1	Carbamidomethylation; Deamidation (NQ)
tr|D6RBJ7|D6RBJ7_HUMAN	K.LC(+57.02)DNLSTKN(+.98)SK.F	Y	47.01	1279.61	3.6	640.813	2	9.37	1	Carbamidomethylation; Deamidation (NQ)
sp|P07996|TSP1_HUMAN	R.TIVTTLQDSIR.K	Y	46.41	1245.69	0.2	623.854	2	23.14	1
sp|P69905|HBA_HUMAN	R.MFLSFPTTK.T	Y	46.38	1070.55	8.6	536.285	2	25.48	7
sp|P02787|TRFE_HUMAN	K.KSC(+57.02)HTGLGR.S	Y	46.35	1014.5	-1.3	508.258	2	4.14	4	Carbamidomethylation
tr|C9JVG0|C9JVG0_HUMAN	K.KSC(+57.02)HTGLGR.S	Y	46.35	1014.5	-1.3	508.258	2	4.14	4	Carbamidomethylation
sp|P23142|FBLN1_HUMAN	R.RGYQLSDVDGVTC(+57.02)EDIDEC(+57.02)ALPTGGHIC(+57.02)SYR.C	Y	46.03	3542.55	16.9	886.66	4	24.52	1	Carbamidomethylation
tr|B1AHL2|B1AHL2_HUMAN	R.RGYQLSDVDGVTC(+57.02)EDIDEC(+57.02)ALPTGGHIC(+57.02)SYR.C	Y	46.03	3542.55	16.9	886.66	4	24.52	1	Carbamidomethylation
tr|A0A0C4DGB6|A0A0C4DGB6_HUMAN	K.HKPKATKEQ(+.98)LK.A	N	45.52	1307.76	-30.7	436.913	3	4.08	2	Deamidation (NQ)
sp|P02768|ALBU_HUMAN	K.HKPKATKEQ(+.98)LK.A	N	45.52	1307.76	-30.7	436.913	3	4.08	2	Deamidation (NQ)
sp|P02749|APOH_HUMAN	K.VSFFC(+57.02)KNK.E	Y	45.45	1028.51	0.7	515.263	2	14.28	1	Carbamidomethylation
tr|E7EQB2|E7EQB2_HUMAN	K.SC(+57.02)HTAVDR.T	Y	45.35	944.413	-1.4	473.213	2	3.99	10	Carbamidomethylation
tr|E7ER44|E7ER44_HUMAN	K.SC(+57.02)HTAVDR.T	Y	45.35	944.413	-1.4	473.213	2	3.99	10	Carbamidomethylation
sp|P02788|TRFL_HUMAN	K.SC(+57.02)HTAVDR.T	Y	45.35	944.413	-1.4	473.213	2	3.99	10	Carbamidomethylation
tr|A8MUF7|A8MUF7_HUMAN	R.LLVVYPWTQR.F	Y	45.3	1273.72	8.8	637.872	2	28.09	4
tr|E9PEW8|E9PEW8_HUMAN	R.LLVVYPWTQR.F	Y	45.3	1273.72	8.8	637.872	2	28.09	4
tr|E9PBW4|E9PBW4_HUMAN	R.LLVVYPWTQR.F	Y	45.3	1273.72	8.8	637.872	2	28.09	4
tr|E9PFT6|E9PFT6_HUMAN	R.LLVVYPWTQR.F	Y	45.3	1273.72	8.8	637.872	2	28.09	4
sp|P69891|HBG1_HUMAN	R.LLVVYPWTQR.F	Y	45.3	1273.72	8.8	637.872	2	28.09	4
sp|P02100|HBE_HUMAN	R.LLVVYPWTQR.F	Y	45.3	1273.72	8.8	637.872	2	28.09	4
sp|P02042|HBD_HUMAN	R.LLVVYPWTQR.F	Y	45.3	1273.72	8.8	637.872	2	28.09	4
sp|P69892|HBG2_HUMAN	R.LLVVYPWTQR.F	Y	45.3	1273.72	8.8	637.872	2	28.09	4
sp|P02771|FETA_HUMAN	K.GYQELLEK.C	Y	45.14	978.502	2.8	490.26	2	16.57	3
tr|A0A0C4DGB6|A0A0C4DGB6_HUMAN	K.C(+57.02)ASLQ(+.98)KFGER.A	N	44.94	1195.57	11.5	598.797	2	13.13	3	Carbamidomethylation; Deamidation (NQ)
sp|P02768|ALBU_HUMAN	K.C(+57.02)ASLQ(+.98)KFGER.A	N	44.94	1195.57	11.5	598.797	2	13.13	3	Carbamidomethylation; Deamidation (NQ)
tr|G3V1N2|G3V1N2_HUMAN	MFLSFPTTK.T	Y	44.9	1070.55	2.8	536.282	2	25.82	5
sp|P01024|CO3_HUMAN	K.GYTQQLAFR.Q	Y	44.44	1082.55	6.7	542.286	2	17.41	2
sp|P01023|A2MG_HUMAN	K.GPTQEFKKR.T	Y	44.03	1089.59	0.4	545.804	2	6.84	1
tr|F8W7L3|F8W7L3_HUMAN	K.GPTQEFKKR.T	Y	44.03	1089.59	0.4	545.804	2	6.84	1
tr|Q5VY30|Q5VY30_HUMAN	K.YWGVASFLQK.G	Y	44.03	1197.62	2.4	599.818	2	27.82	1
tr|A0A0C4DGV7|A0A0C4DGV7_HUMAN	K.YWGVASFLQK.G	Y	44.03	1197.62	2.4	599.818	2	27.82	1
sp|P02753|RET4_HUMAN	K.YWGVASFLQK.G	Y	44.03	1197.62	2.4	599.818	2	27.82	1
sp|P02795|MT2_HUMAN	K.KSC(+57.02)C(+57.02)SC(+57.02)C(+57.02)PVGC(+57.02)AK.C	N	43.74	1572.6	9.5	787.313	2	7.67	1	Carbamidomethylation
tr|E7EQB2|E7EQB2_HUMAN	K.KSC(+57.02)HTAVDR.T	Y	43.67	1072.51	0.2	537.262	2	2.45	3	Carbamidomethylation
tr|E7ER44|E7ER44_HUMAN	K.KSC(+57.02)HTAVDR.T	Y	43.67	1072.51	0.2	537.262	2	2.45	3	Carbamidomethylation
sp|P02788|TRFL_HUMAN	K.KSC(+57.02)HTAVDR.T	Y	43.67	1072.51	0.2	537.262	2	2.45	3	Carbamidomethylation
sp|P02771|FETA_HUMAN	R.SC(+57.02)GLFQK.L	Y	43.59	838.401	-1	420.207	2	12.78	4	Carbamidomethylation
tr|A0A087WWT3|A0A087WWT3_HUMAN	K.HKPKATKEQ(+.98)LK.A	N	43.55	1307.76	-31	436.912	3	6.02	3	Deamidation (NQ)
tr|A0A087WWT3|A0A087WWT3_HUMAN	V.RYTK(+42.01)KVPQVSTPTLVEVSR.N	N	43.55	2229.25	35.4	1115.67	2	21.48	1	Acetylation (K)
tr|A6NL76|A6NL76_HUMAN	K.AGFAGDDAPR.A	N	43.29	975.441	-0.9	488.727	2	10.26	2
sp|P63267|ACTH_HUMAN	K.AGFAGDDAPR.A	N	43.29	975.441	-0.9	488.727	2	10.26	2
sp|P68032|ACTC_HUMAN	K.AGFAGDDAPR.A	N	43.29	975.441	-0.9	488.727	2	10.26	2
sp|P68133|ACTS_HUMAN	K.AGFAGDDAPR.A	N	43.29	975.441	-0.9	488.727	2	10.26	2
sp|P62736|ACTA_HUMAN	K.AGFAGDDAPR.A	N	43.29	975.441	-0.9	488.727	2	10.26	2
sp|P02795|MT2_HUMAN	K.GASDKC(+57.02)SC(+57.02)C(+57.02)A	Y	43.25	1114.38	7.9	558.204	2	3.75	7	Carbamidomethylation
sp|P02765|FETUA_HUMAN	N.LLAEKQYGFC(+57.02)K.A	Y	42.95	1355.69	4.6	678.856	2	15.88	1	Carbamidomethylation
tr|C9JV77|C9JV77_HUMAN	N.LLAEKQYGFC(+57.02)K.A	Y	42.95	1355.69	4.6	678.856	2	15.88	1	Carbamidomethylation
tr|A0A0C4DGB6|A0A0C4DGB6_HUMAN	K.C(+57.02)C(+57.02)TESLVNRRPC(+57.02).F	N	42.75	1550.68	4.8	517.902	3	12.2	3	Carbamidomethylation
sp|P02768|ALBU_HUMAN	K.C(+57.02)C(+57.02)TESLVNRRPC(+57.02).F	N	42.75	1550.68	4.8	517.902	3	12.2	3	Carbamidomethylation
tr|A0A0C4DGB6|A0A0C4DGB6_HUMAN	H.GDLLEC(+57.02)ADDRADLAK.Y	N	42.39	1660.77	3.9	831.397	2	18.56	1	Carbamidomethylation
sp|P02768|ALBU_HUMAN	H.GDLLEC(+57.02)ADDRADLAK.Y	N	42.39	1660.77	3.9	831.397	2	18.56	1	Carbamidomethylation
tr|A0A0J9YY65|A0A0J9YY65_HUMAN	R.LC(+57.02)QDLGPGAFRLAAR.M	Y	42.19	1643.86	4	548.962	3	23.25	1	Carbamidomethylation
tr|C9JMH6|C9JMH6_HUMAN	R.LC(+57.02)QDLGPGAFRLAAR.M	Y	42.19	1643.86	4	548.962	3	23.25	1	Carbamidomethylation
tr|A0A0G2JPA8|A0A0G2JPA8_HUMAN	R.LC(+57.02)QDLGPGAFRLAAR.M	Y	42.19	1643.86	4	548.962	3	23.25	1	Carbamidomethylation
sp|P08697|A2AP_HUMAN	R.LC(+57.02)QDLGPGAFRLAAR.M	Y	42.19	1643.86	4	548.962	3	23.25	1	Carbamidomethylation
tr|G3XAP6|G3XAP6_HUMAN	R.AVAEPGIQLK.A	N	42.15	1024.59	3.2	513.305	2	17.6	1
sp|P49747|COMP_HUMAN	R.AVAEPGIQLK.A	N	42.15	1024.59	3.2	513.305	2	17.6	1
tr|E7ES19|E7ES19_HUMAN	R.AVAEPGIQLK.A	N	42.15	1024.59	3.2	513.305	2	17.6	1
sp|P35443|TSP4_HUMAN	R.AVAEPGIQLK.A	N	42.15	1024.59	3.2	513.305	2	17.6	1
tr|Q5VY30|Q5VY30_HUMAN	R.VSSFRVKENFDKAR.F	Y	41.73	1681.89	3.9	561.639	3	13.86	1
tr|A0A0C4DGV7|A0A0C4DGV7_HUMAN	R.VSSFRVKENFDKAR.F	Y	41.73	1681.89	3.9	561.639	3	13.86	1
sp|P02753|RET4_HUMAN	R.VSSFRVKENFDKAR.F	Y	41.73	1681.89	3.9	561.639	3	13.86	1
sp|P02774|VTDB_HUMAN	K.LC(+57.02)DNLSTK.N	Y	41.55	949.454	-1.1	475.734	2	9.85	3	Carbamidomethylation
tr|D6RF35|D6RF35_HUMAN	K.LC(+57.02)DNLSTK.N	Y	41.55	949.454	-1.1	475.734	2	9.85	3	Carbamidomethylation
tr|D6RBJ7|D6RBJ7_HUMAN	K.LC(+57.02)DNLSTK.N	Y	41.51	949.454	-0.5	475.734	2	10.54	4	Carbamidomethylation
tr|A6NL76|A6NL76_HUMAN	R.AVFPSIVGRPR.H	N	41.37	1197.7	7.9	599.861	2	21.11	1
sp|P63267|ACTH_HUMAN	R.AVFPSIVGRPR.H	N	41.37	1197.7	7.9	599.861	2	21.11	1
sp|P68032|ACTC_HUMAN	R.AVFPSIVGRPR.H	N	41.37	1197.7	7.9	599.861	2	21.11	1
sp|P68133|ACTS_HUMAN	R.AVFPSIVGRPR.H	N	41.37	1197.7	7.9	599.861	2	21.11	1
sp|P62736|ACTA_HUMAN	R.AVFPSIVGRPR.H	N	41.37	1197.7	7.9	599.861	2	21.11	1
sp|P63261|ACTG_HUMAN	R.AVFPSIVGRPR.H	N	41.37	1197.7	7.9	599.861	2	21.11	1
sp|P60709|ACTB_HUMAN	R.AVFPSIVGRPR.H	N	41.37	1197.7	7.9	599.861	2	21.11	1
tr|G3V2B9|G3V2B9_HUMAN	K.QINDYVEK.G	Y	41.3	1007.49	34.7	504.771	2	9.96	2
tr|A0A0G2JRN3|A0A0G2JRN3_HUMAN	K.QINDYVEK.G	Y	41.3	1007.49	34.7	504.771	2	9.96	2
tr|A0A024R6I7|A0A024R6I7_HUMAN	K.QINDYVEK.G	Y	41.3	1007.49	34.7	504.771	2	9.96	2
sp|P01009|A1AT_HUMAN	K.QINDYVEK.G	Y	41.3	1007.49	34.7	504.771	2	9.96	2
sp|P23527|H2B1O_HUMAN	K.HAVSEGTKAVTKYTSSK	Y	41.25	1792.93	4.8	449.242	4	10	1
tr|Q5T985|Q5T985_HUMAN	K.MKQTVEAMK.T	Y	41.18	1064.54	6.6	533.279	2	8.23	1
tr|A0A087WTE1|A0A087WTE1_HUMAN	K.MKQTVEAMK.T	Y	41.18	1064.54	6.6	533.279	2	8.23	1
sp|P19823|ITIH2_HUMAN	K.MKQTVEAMK.T	Y	41.18	1064.54	6.6	533.279	2	8.23	1
tr|J3KMX3|J3KMX3_HUMAN	K.GYQELLEK.C	Y	41.14	978.502	-0.8	490.258	2	16.85	2
sp|P04732|MT1E_HUMAN	K.C(+57.02)AQGC(+57.02)VC(+57.02)K.G	Y	41.09	981.383	-4.3	491.697	2	4.98	1	Carbamidomethylation
tr|H3BU80|H3BU80_HUMAN	K.C(+57.02)AQGC(+57.02)VC(+57.02)K.G	Y	41.09	981.383	-4.3	491.697	2	4.98	1	Carbamidomethylation
sp|Q93083|MT1L_HUMAN	K.C(+57.02)AQGC(+57.02)VC(+57.02)K.G	Y	41.09	981.383	-4.3	491.697	2	4.98	1	Carbamidomethylation
sp|P07438|MT1B_HUMAN	K.C(+57.02)AQGC(+57.02)VC(+57.02)K.G	Y	41.09	981.383	-4.3	491.697	2	4.98	1	Carbamidomethylation
sp|P04733|MT1F_HUMAN	K.C(+57.02)AQGC(+57.02)VC(+57.02)K.G	Y	41.09	981.383	-4.3	491.697	2	4.98	1	Carbamidomethylation
tr|A6NL76|A6NL76_HUMAN	R.HQGVMVGMGQK.D	Y	40.94	1170.56	8.3	586.294	2	11.89	1
sp|P63267|ACTH_HUMAN	R.HQGVMVGMGQK.D	Y	40.94	1170.56	8.3	586.294	2	11.89	1
sp|P68032|ACTC_HUMAN	R.HQGVMVGMGQK.D	Y	40.94	1170.56	8.3	586.294	2	11.89	1
sp|P68133|ACTS_HUMAN	R.HQGVMVGMGQK.D	Y	40.94	1170.56	8.3	586.294	2	11.89	1
sp|P62736|ACTA_HUMAN	R.HQGVMVGMGQK.D	Y	40.94	1170.56	8.3	586.294	2	11.89	1
sp|P02771|FETA_HUMAN	K.YIQESQALAKR.S	Y	40.76	1305.7	4.1	653.862	2	11.61	1
tr|J3KMX3|J3KMX3_HUMAN	R.SC(+57.02)GLFQK.L	Y	40.73	838.401	-2.5	420.207	2	13.26	4	Carbamidomethylation
sp|P02649|APOE_HUMAN	R.LQAEAFQAR.L	Y	40.65	1032.54	7	517.278	2	14.22	2
tr|A0A0C4DGB6|A0A0C4DGB6_HUMAN	K.YLYEIARR.H	N	40.31	1082.59	5.7	542.304	2	15.24	7
sp|P02768|ALBU_HUMAN	K.YLYEIARR.H	N	40.31	1082.59	5.7	542.304	2	15.24	7
sp|P07996|TSP1_HUMAN	R.TC(+57.02)HIQEC(+57.02)DKR.F	Y	39.93	1345.59	7.7	673.806	2	5.99	1	Carbamidomethylation
tr|Q5VY30|Q5VY30_HUMAN	R.VKENFDKAR.F	Y	39.9	1105.59	-0.4	553.801	2	7.02	2
tr|A0A0C4DGV7|A0A0C4DGV7_HUMAN	R.VKENFDKAR.F	Y	39.9	1105.59	-0.4	553.801	2	7.02	2
sp|P02753|RET4_HUMAN	R.VKENFDKAR.F	Y	39.9	1105.59	-0.4	553.801	2	7.02	2
sp|P01023|A2MG_HUMAN	K.YGAATFTRTG.K	Y	39.53	1043.5	4.8	522.761	2	13.23	3
sp|P02765|FETUA_HUMAN	K.Q(-17.03)YGFC(+57.02)K.A	Y	38.9	784.321	6.8	785.334	1	14.64	1	Pyro-glu from Q; Carbamidomethylation
tr|C9JV77|C9JV77_HUMAN	K.Q(-17.03)YGFC(+57.02)K.A	Y	38.9	784.321	6.8	785.334	1	14.64	1	Pyro-glu from Q; Carbamidomethylation
sp|P02748|CO9_HUMAN	R.VVEESELAR.T	Y	38.79	1030.53	-0.4	516.272	2	11.98	2
tr|H7C013|H7C013_HUMAN	K.YLYEIARR.H	N	38.67	1082.59	2.2	542.302	2	15.67	4
tr|A0A0C4DGB6|A0A0C4DGB6_HUMAN	K.YIC(+57.02)ENQDSISSK.L	N	38.1	1442.63	10.8	722.332	2	11.93	11	Carbamidomethylation
sp|P02768|ALBU_HUMAN	K.YIC(+57.02)ENQDSISSK.L	N	38.1	1442.63	10.8	722.332	2	11.93	11	Carbamidomethylation
sp|P02771|FETA_HUMAN	S.EEGRHN(+.98)C(+57.02)FLAHKK.P	Y	38.08	1625.77	-0.9	407.45	4	8.09	1	Deamidation (NQ); Carbamidomethylation
tr|J3KMX3|J3KMX3_HUMAN	S.EEGRHN(+.98)C(+57.02)FLAHKK.P	Y	38.08	1625.77	-0.9	407.45	4	8.09	1	Deamidation (NQ); Carbamidomethylation
tr|A0A0C4DGB6|A0A0C4DGB6_HUMAN	K.HKPKATKEQ(+.98)LKAVMDDFAAFVEK(-.98).C	N	37.7	2630.39	6.5	877.809	3	30.45	3	Deamidation (NQ); Amidation
sp|P02768|ALBU_HUMAN	K.HKPKATKEQ(+.98)LKAVMDDFAAFVEK(-.98).C	N	37.7	2630.39	6.5	877.809	3	30.45	3	Deamidation (NQ); Amidation
tr|A0A087WWT3|A0A087WWT3_HUMAN	K.HKPKATKEQ(+.98)LKAVMDDFAAFVEK(-.98).C	N	37.7	2630.39	6.5	877.809	3	30.45	3	Deamidation (NQ); Amidation
tr|Q5T985|Q5T985_HUMAN	R.AKGKTAGLVR.S	Y	37.57	999.619	1.6	500.817	2	5.32	5
tr|A0A087WTE1|A0A087WTE1_HUMAN	R.AKGKTAGLVR.S	Y	37.57	999.619	1.6	500.817	2	5.32	5
sp|P19823|ITIH2_HUMAN	R.AKGKTAGLVR.S	Y	37.57	999.619	1.6	500.817	2	5.32	5
tr|Q5T987|Q5T987_HUMAN	R.AKGKTAGLVR.S	Y	37.57	999.619	1.6	500.817	2	5.32	5
tr|E9PPA1|E9PPA1_HUMAN	R.ASSPPQILPQ.L	Y	37.46	1036.56	12	519.291	2	15.91	3
tr|C9JCS0|C9JCS0_HUMAN	R.ASSPPQILPQ	Y	37.46	1036.56	12	519.291	2	15.91	3
tr|C9JBS2|C9JBS2_HUMAN	R.ASSPPQILPQ.L	Y	37.46	1036.56	12	519.291	2	15.91	3
tr|E9PID2|E9PID2_HUMAN	R.ASSPPQILPQ.L	Y	37.46	1036.56	12	519.291	2	15.91	3
tr|B5MBY7|B5MBY7_HUMAN	R.ASSPPQILPQ.L	Y	37.46	1036.56	12	519.291	2	15.91	3
sp|Q13133|NR1H3_HUMAN	R.ASSPPQILPQ.L	Y	37.46	1036.56	12	519.291	2	15.91	3
tr|B4DXU5|B4DXU5_HUMAN	R.ASSPPQILPQ.L	Y	37.46	1036.56	12	519.291	2	15.91	3
tr|E9PLL4|E9PLL4_HUMAN	R.ASSPPQILPQ.L	Y	37.46	1036.56	12	519.291	2	15.91	3
tr|A0A0G2JL54|A0A0G2JL54_HUMAN	R.QGSFQGGFR.S	Y	37.45	982.462	0.9	492.239	2	12.54	2
tr|A0A140TA29|A0A140TA29_HUMAN	R.QGSFQGGFR.S	Y	37.45	982.462	0.9	492.239	2	12.54	2
tr|A0A140TA44|A0A140TA44_HUMAN	R.QGSFQGGFR.S	Y	37.45	982.462	0.9	492.239	2	12.54	2
tr|A0A140TA32|A0A140TA32_HUMAN	R.QGSFQGGFR.S	Y	37.45	982.462	0.9	492.239	2	12.54	2
tr|A0A140TA49|A0A140TA49_HUMAN	R.QGSFQGGFR.S	Y	37.45	982.462	0.9	492.239	2	12.54	2
tr|F5GXS0|F5GXS0_HUMAN	R.QGSFQGGFR.S	Y	37.45	982.462	0.9	492.239	2	12.54	2
tr|A0A0G2JPR0|A0A0G2JPR0_HUMAN	R.QGSFQGGFR.S	Y	37.45	982.462	0.9	492.239	2	12.54	2
sp|P0C0L4|CO4A_HUMAN	R.QGSFQGGFR.S	Y	37.45	982.462	0.9	492.239	2	12.54	2
sp|P0C0L5|CO4B_HUMAN	R.QGSFQGGFR.S	Y	37.45	982.462	0.9	492.239	2	12.54	2
tr|A0A087WW43|A0A087WW43_HUMAN	R.GISMLNK.A	Y	37.33	761.41	13	762.428	1	13.85	2
tr|E7ET33|E7ET33_HUMAN	R.GISMLNK.A	Y	37.33	761.41	13	762.428	1	13.85	2
sp|Q06033|ITIH3_HUMAN	R.GISMLNK.A	Y	37.33	761.41	13	762.428	1	13.85	2
sp|P02765|FETUA_HUMAN	K.C(+57.02)NLLAEK.Q	Y	37.13	846.427	-0.5	424.221	2	13.06	2	Carbamidomethylation
tr|C9JV77|C9JV77_HUMAN	K.C(+57.02)NLLAEK.Q	Y	37.13	846.427	-0.5	424.221	2	13.06	2	Carbamidomethylation
tr|A6NL76|A6NL76_HUMAN	R.MQKEITALAPSTMK.I	Y	36.55	1547.81	11.7	774.919	2	18.99	1
sp|P63267|ACTH_HUMAN	R.MQKEITALAPSTMK.I	Y	36.55	1547.81	11.7	774.919	2	18.99	1
sp|P68032|ACTC_HUMAN	R.MQKEITALAPSTMK.I	Y	36.55	1547.81	11.7	774.919	2	18.99	1
sp|P68133|ACTS_HUMAN	R.MQKEITALAPSTMK.I	Y	36.55	1547.81	11.7	774.919	2	18.99	1
sp|P62736|ACTA_HUMAN	R.MQKEITALAPSTMK.I	Y	36.55	1547.81	11.7	774.919	2	18.99	1
sp|P63261|ACTG_HUMAN	R.MQKEITALAPSTMK.I	Y	36.55	1547.81	11.7	774.919	2	18.99	1
sp|P60709|ACTB_HUMAN	R.MQKEITALAPSTMK.I	Y	36.55	1547.81	11.7	774.919	2	18.99	1
sp|P00747|PLMN_HUMAN	T.YQC(+57.02)LKGTGE(-.98).N	Y	36.35	1053.49	35.2	527.771	2	7.16	1	Carbamidomethylation; Amidation
sp|P02787|TRFE_HUMAN	K.C(+57.02)LKDGAGDVAFVK.H	Y	36.3	1378.69	24.8	690.37	2	28.44	3	Carbamidomethylation
sp|P00747|PLMN_HUMAN	R.AFQYHSK.E	Y	35.81	879.424	1.4	440.72	2	7.51	1
sp|Q02325|PLGB_HUMAN	R.AFQYHSK.E	Y	35.81	879.424	1.4	440.72	2	7.51	1
sp|Q15195|PLGA_HUMAN	R.AFQYHSK.E	Y	35.81	879.424	1.4	440.72	2	7.51	1
tr|Q5TEH5|Q5TEH5_HUMAN	R.AFQYHSK.E	Y	35.81	879.424	1.4	440.72	2	7.51	1
tr|A6PVI2|A6PVI2_HUMAN	K.AFQYHSK.E	Y	35.81	879.424	1.4	440.72	2	7.51	1
tr|A0A0C4DGB6|A0A0C4DGB6_HUMAN	K.YIC(+57.02)ENQ(+.98)DSISSK.L	N	35.68	1443.62	14	722.827	2	12.33	3	Carbamidomethylation; Deamidation (NQ)
sp|P02768|ALBU_HUMAN	K.YIC(+57.02)ENQ(+.98)DSISSK.L	N	35.68	1443.62	14	722.827	2	12.33	3	Carbamidomethylation; Deamidation (NQ)
tr|A0A0G2JH38|A0A0G2JH38_HUMAN	H.C(+57.02)YDGYTLR.G	Y	35.37	1046.45	0.2	524.232	2	14.13	2	Carbamidomethylation
sp|P00751|CFAB_HUMAN	H.C(+57.02)YDGYTLR.G	Y	35.37	1046.45	0.2	524.232	2	14.13	2	Carbamidomethylation
tr|E7ETN3|E7ETN3_HUMAN	H.C(+57.02)YDGYTLR.G	Y	35.37	1046.45	0.2	524.232	2	14.13	2	Carbamidomethylation
tr|B4E1Z4|B4E1Z4_HUMAN	H.C(+57.02)YDGYTLR.G	Y	35.37	1046.45	0.2	524.232	2	14.13	2	Carbamidomethylation
tr|C9JRT3|C9JRT3_HUMAN	H.C(+57.02)YDGYTLR.G	Y	35.37	1046.45	0.2	524.232	2	14.13	2	Carbamidomethylation
sp|P01023|A2MG_HUMAN	K.GPTQEFK.K	Y	35.23	805.397	-5.9	403.703	2	8.95	1
tr|F8W7L3|F8W7L3_HUMAN	K.GPTQEFK.K	Y	35.23	805.397	-5.9	403.703	2	8.95	1
tr|A0A0C4DGB6|A0A0C4DGB6_HUMAN	K.YLYEIAR.R	N	35.13	926.486	3.1	464.252	2	17.87	10
sp|P02768|ALBU_HUMAN	K.YLYEIAR.R	N	35.13	926.486	3.1	464.252	2	17.87	10
tr|H7C013|H7C013_HUMAN	K.YLYEIAR.R	N	35.13	926.486	3.1	464.252	2	17.87	10
tr|A0A0C4DGB6|A0A0C4DGB6_HUMAN	T.PTLVEVSR.N	N	35	899.508	1.9	450.762	2	20.74	5
sp|P02768|ALBU_HUMAN	T.PTLVEVSR.N	N	35	899.508	1.9	450.762	2	20.74	5
sp|P02795|MT2_HUMAN	K.C(+57.02)AQGC(+57.02)IC(+57.02)KGASDKC(+57.02)SC(+57.02)C(+57.02)A	Y	34.93	2091.77	6.4	698.269	3	9.01	1	Carbamidomethylation
sp|P01023|A2MG_HUMAN	K.ATVLNYLPK.C	N	34.87	1017.59	-0.9	509.8	2	23.37	1
tr|E7ES19|E7ES19_HUMAN	R.C(+57.02)DSNPC(+57.02)FR.G	Y	34.83	1054.4	6.2	528.209	2	9.55	1	Carbamidomethylation
sp|P35443|TSP4_HUMAN	R.C(+57.02)DSNPC(+57.02)FR.G	Y	34.83	1054.4	6.2	528.209	2	9.55	1	Carbamidomethylation
sp|P01023|A2MG_HUMAN	K.YGAATFTRTGK.A	Y	34.7	1171.6	1.7	586.808	2	11.69	1
tr|A0A087WWT3|A0A087WWT3_HUMAN	K.C(+57.02)C(+57.02)TESLVNRRPC(+57.02).F	N	34.58	1550.68	0.9	517.899	3	12.64	3	Carbamidomethylation
sp|P02765|FETUA_HUMAN	Q.LHRAHYDLR.H	N	34.54	1179.63	-2.7	394.215	3	8.23	3
tr|C9JV77|C9JV77_HUMAN	Q.LHRAHYDLR.H	N	34.54	1179.63	-2.7	394.215	3	8.23	3
tr|Q5T985|Q5T985_HUMAN	G.GSEIVVAGK.F	Y	34.19	858.481	-1.3	430.247	2	12.67	1
tr|A0A087WTE1|A0A087WTE1_HUMAN	G.GSEIVVAGK.F	Y	34.19	858.481	-1.3	430.247	2	12.67	1
sp|P19823|ITIH2_HUMAN	G.GSEIVVAGK.F	Y	34.19	858.481	-1.3	430.247	2	12.67	1
sp|P02765|FETUA_HUMAN	R.AHYDLR.H	Y	34.09	773.382	0	387.698	2	8.3	13
tr|C9JV77|C9JV77_HUMAN	R.AHYDLR.H	Y	34.09	773.382	0	387.698	2	8.3	13
sp|P69905|HBA_HUMAN	R.VDPVNFK.L	Y	34	817.433	-2.6	409.723	2	15.29	2
tr|G3V1N2|G3V1N2_HUMAN	R.VDPVNFK.L	Y	34	817.433	-2.6	409.723	2	15.29	2
sp|P02008|HBAZ_HUMAN	R.VDPVNFK.L	Y	34	817.433	-2.6	409.723	2	15.29	2
sp|P02751|FINC_HUMAN	R.ISC(+57.02)TIANR.C	Y	33.96	933.47	-2.1	467.741	2	9.81	1	Carbamidomethylation
tr|J3KMX3|J3KMX3_HUMAN	K.YIQESQALAKR.S	Y	33.88	1305.7	-1	653.859	2	12.05	1
tr|A0A0C4DGB6|A0A0C4DGB6_HUMAN	R.RHPYFYAPELL.F	N	33.75	1404.72	15.6	703.378	2	26.63	3
sp|P02768|ALBU_HUMAN	R.RHPYFYAPELL.F	N	33.75	1404.72	15.6	703.378	2	26.63	3
tr|H7C013|H7C013_HUMAN	R.RHPYFYAPELL.F	N	33.6	1404.72	3.6	703.369	2	26.97	3
tr|A0A0C4DGB6|A0A0C4DGB6_HUMAN	K.LVTDLTK.V	N	32.93	788.464	2.1	395.24	2	13.77	6
sp|P02768|ALBU_HUMAN	K.LVTDLTK.V	N	32.93	788.464	2.1	395.24	2	13.77	6
tr|A0A0C4DGB6|A0A0C4DGB6_HUMAN	C.ASLQKFGER.A	N	32.81	1034.55	2.8	518.284	2	12.02	3
sp|P02768|ALBU_HUMAN	C.ASLQKFGER.A	N	32.81	1034.55	2.8	518.284	2	12.02	3
sp|P02765|FETUA_HUMAN	L.HRAHYDLR.H	Y	32.6	1066.54	-5.5	356.519	3	6.51	3
tr|C9JV77|C9JV77_HUMAN	L.HRAHYDLR.H	Y	32.6	1066.54	-5.5	356.519	3	6.51	3
sp|P02452|CO1A1_HUMAN	K.TVIEYKTTK.T	Y	32.44	1081.6	-0.6	541.808	2	10.9	2
tr|A0A087WWT3|A0A087WWT3_HUMAN	T.PTLVEVSR.N	N	32.42	899.508	-2.1	450.76	2	20.97	6
tr|Q5T985|Q5T985_HUMAN	R.ALYAQAR.A	Y	32.37	791.429	-2.9	396.721	2	8.65	2
tr|A0A087WTE1|A0A087WTE1_HUMAN	R.ALYAQAR.A	Y	32.37	791.429	-2.9	396.721	2	8.65	2
sp|P19823|ITIH2_HUMAN	R.ALYAQAR.A	Y	32.37	791.429	-2.9	396.721	2	8.65	2
tr|A0A0C4DGB6|A0A0C4DGB6_HUMAN	R.RHPYFYAPEL.L	N	32.18	1291.63	2	646.826	2	23.03	2
sp|P02768|ALBU_HUMAN	R.RHPYFYAPEL.L	N	32.18	1291.63	2	646.826	2	23.03	2
tr|H7C013|H7C013_HUMAN	R.RHPYFYAPEL.L	N	32.18	1291.63	2	646.826	2	23.03	2
tr|H7C0L5|H7C0L5_HUMAN	K.VRPQQLVK.H	Y	32.15	966.597	-0.3	484.306	2	11.72	2
sp|Q14624|ITIH4_HUMAN	K.VRPQQLVK.H	Y	32.15	966.597	-0.3	484.306	2	11.72	2
tr|B7ZKJ8|B7ZKJ8_HUMAN	K.VRPQQLVK.H	Y	32.15	966.597	-0.3	484.306	2	11.72	2
tr|A0A0C4DGB6|A0A0C4DGB6_HUMAN	R.MPC(+57.02)AEDYLSVVLNQLC(+57.02)VLHEK(+42.01)TPVSDR.V	N	32.11	3214.55	25.9	643.933	5	37.13	1	Carbamidomethylation; Acetylation (K)
sp|P02768|ALBU_HUMAN	R.MPC(+57.02)AEDYLSVVLNQLC(+57.02)VLHEK(+42.01)TPVSDR.V	N	32.11	3214.55	25.9	643.933	5	37.13	1	Carbamidomethylation; Acetylation (K)
tr|A0A087WWT3|A0A087WWT3_HUMAN	R.MPC(+57.02)AEDYLSVVLNQLC(+57.02)VLHEK(+42.01)TPVSDR.V	N	32.11	3214.55	25.9	643.933	5	37.13	1	Carbamidomethylation; Acetylation (K)
tr|Q5T985|Q5T985_HUMAN	R.KLGSYEHR.I	Y	32.06	988.509	-2.4	495.261	2	6.18	2
tr|A0A087WTE1|A0A087WTE1_HUMAN	R.KLGSYEHR.I	Y	32.06	988.509	-2.4	495.261	2	6.18	2
sp|P19823|ITIH2_HUMAN	R.KLGSYEHR.I	Y	32.06	988.509	-2.4	495.261	2	6.18	2
tr|Q5T987|Q5T987_HUMAN	R.KLGSYEHR.I	Y	32.06	988.509	-2.4	495.261	2	6.18	2
tr|B1AHL2|B1AHL2_HUMAN	R.C(+57.02)LAFEC(+57.02)PENYRR.S	Y	32.06	1613.71	1.5	538.911	3	17.74	1	Carbamidomethylation
sp|P23142|FBLN1_HUMAN	R.C(+57.02)LAFEC(+57.02)PENYRR.S	Y	32.06	1613.71	1.5	538.911	3	17.74	1	Carbamidomethylation
tr|A0A0C4DGB6|A0A0C4DGB6_HUMAN	K.YIC(+57.02)ENQDSISSKLK.E	N	31.48	1683.81	1.2	562.279	3	15.72	3	Carbamidomethylation
sp|P02768|ALBU_HUMAN	K.YIC(+57.02)ENQDSISSKLK.E	N	31.48	1683.81	1.2	562.279	3	15.72	3	Carbamidomethylation
sp|P02774|VTDB_HUMAN	K.LC(+57.02)MAALK.H	Y	31.37	805.419	-1.3	403.716	2	16.94	2	Carbamidomethylation
tr|D6RF35|D6RF35_HUMAN	K.LC(+57.02)MAALK.H	Y	31.37	805.419	-1.3	403.716	2	16.94	2	Carbamidomethylation
tr|D6RBJ7|D6RBJ7_HUMAN	K.LC(+57.02)MAALK.H	Y	31.37	805.419	-1.3	403.716	2	16.94	2	Carbamidomethylation
tr|D6RF20|D6RF20_HUMAN	K.LC(+57.02)MAALK.H	Y	31.37	805.419	-1.3	403.716	2	16.94	2	Carbamidomethylation
tr|A0A0C4DGB6|A0A0C4DGB6_HUMAN	R.FPKAEFAEVSK(+42.01).L	N	31.18	1293.66	27.3	432.239	3	19.68	1	Acetylation (K)
sp|P02768|ALBU_HUMAN	R.FPKAEFAEVSK(+42.01).L	N	31.18	1293.66	27.3	432.239	3	19.68	1	Acetylation (K)
tr|A0A0C4DGB6|A0A0C4DGB6_HUMAN	K.ALVLIAFAQ(+.98)YLQQC(+57.02)PFEDHVK.L	Y	31.17	2490.26	2.5	831.097	3	36.24	1	Deamidation (NQ); Carbamidomethylation
sp|P02768|ALBU_HUMAN	K.ALVLIAFAQ(+.98)YLQQC(+57.02)PFEDHVK.L	Y	31.17	2490.26	2.5	831.097	3	36.24	1	Deamidation (NQ); Carbamidomethylation
tr|A0A087WWT3|A0A087WWT3_HUMAN	K.ALVLIAFAQ(+.98)YLQQC(+57.02)PFEDHVK.L	Y	31.17	2490.26	2.5	831.097	3	36.24	1	Deamidation (NQ); Carbamidomethylation
tr|H7C013|H7C013_HUMAN	K.ALVLIAFAQ(+.98)YLQQC(+57.02)PFEDHVK.L	Y	31.17	2490.26	2.5	831.097	3	36.24	1	Deamidation (NQ); Carbamidomethylation
sp|P02787|TRFE_HUMAN	K.KSCHTGLGR.S	Y	31.14	957.481	-4.6	479.746	2	4.5	1
tr|C9JVG0|C9JVG0_HUMAN	K.KSCHTGLGR.S	Y	31.14	957.481	-4.6	479.746	2	4.5	1
sp|P69905|HBA_HUMAN	G.EYGAEALERMFLSFPTTK.T	Y	30.77	2089.02	36.2	697.372	3	33.13	1
tr|Q5T987|Q5T987_HUMAN	R.ALYAQAR.A	Y	30.75	791.429	-1.1	396.721	2	9.64	2
tr|A0A0C4DGB6|A0A0C4DGB6_HUMAN	K.QN(+.98)C(+57.02)ELFEQ.L	N	30.53	1067.42	10	534.724	2	7.57	2	Deamidation (NQ); Carbamidomethylation
sp|P02768|ALBU_HUMAN	K.QN(+.98)C(+57.02)ELFEQ.L	N	30.53	1067.42	10	534.724	2	7.57	2	Deamidation (NQ); Carbamidomethylation
tr|A0A087WWT3|A0A087WWT3_HUMAN	K.QN(+.98)C(+57.02)ELFEQ.L	N	30.53	1067.42	10	534.724	2	7.57	2	Deamidation (NQ); Carbamidomethylation
sp|P02765|FETUA_HUMAN	K.QYGFC(+57.02)K.A	Y	30.53	801.348	-5.4	401.679	2	10.24	5	Carbamidomethylation
sp|Q6ZU45|YA021_HUMAN	R.TREQLVPR.L	Y	30.51	997.567	-44.8	499.768	2	13.63	3
tr|H0YMA2|H0YMA2_HUMAN	R.VAAAITK.N	Y	30.38	672.417	-6.7	337.214	2	8.25	4
tr|G5EA42|G5EA42_HUMAN	R.VAAAITK.N	Y	30.38	672.417	-6.7	337.214	2	8.25	4
sp|Q9NZR1|TMOD2_HUMAN	R.VAAAITK.N	Y	30.38	672.417	-6.7	337.214	2	8.25	4
sp|P69905|HBA_HUMAN	K.VGAHAGEYGAEAL.E	Y	30.36	1243.58	7.8	622.804	2	15.49	2
sp|P43652|AFAM_HUMAN	I.LSQKFPK.I	Y	29.94	846.496	0.3	424.255	2	10.35	20
sp|Q6P3W7|SCYL2_HUMAN	K.QKLAKEQEQAQKLK.S	Y	29.68	1668.95	20.4	418.254	4	19.24	6
tr|A0A0U1RQQ9|A0A0U1RQQ9_HUMAN	K.QKLAKEQEQAQKLK.S	Y	29.68	1668.95	20.4	418.254	4	19.24	6
tr|B1AHL2|B1AHL2_HUMAN	K.NVPNC(+57.02)GR.G	Y	29.58	815.371	9.6	408.697	2	5.77	3	Carbamidomethylation
sp|P23142|FBLN1_HUMAN	K.NVPNC(+57.02)GR.G	Y	29.58	815.371	9.6	408.697	2	5.77	3	Carbamidomethylation
sp|P29622|KAIN_HUMAN	W.ADLSGITK.Q	Y	29.52	803.439	-3.5	402.725	2	11.93	1
tr|A0A0G2JL54|A0A0G2JL54_HUMAN	K.AAANQ(+.98)MRNFLVR.A	Y	29.46	1390.71	20.3	696.378	2	16.64	1	Deamidation (NQ)
tr|A0A140TA29|A0A140TA29_HUMAN	K.AAANQ(+.98)MRNFLVR.A	Y	29.46	1390.71	20.3	696.378	2	16.64	1	Deamidation (NQ)
tr|A0A140TA44|A0A140TA44_HUMAN	K.AAANQ(+.98)MRNFLVR.A	Y	29.46	1390.71	20.3	696.378	2	16.64	1	Deamidation (NQ)
tr|A0A140TA32|A0A140TA32_HUMAN	K.AAANQ(+.98)MRNFLVR.A	Y	29.46	1390.71	20.3	696.378	2	16.64	1	Deamidation (NQ)
tr|A0A140TA49|A0A140TA49_HUMAN	K.AAANQ(+.98)MRNFLVR.A	Y	29.46	1390.71	20.3	696.378	2	16.64	1	Deamidation (NQ)
tr|F5GXS0|F5GXS0_HUMAN	K.AAANQ(+.98)MRNFLVR.A	Y	29.46	1390.71	20.3	696.378	2	16.64	1	Deamidation (NQ)
tr|A0A0G2JPR0|A0A0G2JPR0_HUMAN	K.AAANQ(+.98)MRNFLVR.A	Y	29.46	1390.71	20.3	696.378	2	16.64	1	Deamidation (NQ)
sp|P0C0L4|CO4A_HUMAN	K.AAANQ(+.98)MRNFLVR.A	Y	29.46	1390.71	20.3	696.378	2	16.64	1	Deamidation (NQ)
sp|P0C0L5|CO4B_HUMAN	K.AAANQ(+.98)MRNFLVR.A	Y	29.46	1390.71	20.3	696.378	2	16.64	1	Deamidation (NQ)
tr|A8MZB2|A8MZB2_HUMAN	G.KAEGSVAR.E	Y	29.31	816.445	17.7	409.237	2	15.39	8
sp|P61599|NAA20_HUMAN	G.KAEGSVAR.E	Y	29.31	816.445	17.7	409.237	2	15.39	8
tr|E7EQB2|E7EQB2_HUMAN	S.C(+57.02)HTAVDR.T	Y	29.25	857.381	-4	429.696	2	3.83	6	Carbamidomethylation
tr|E7ER44|E7ER44_HUMAN	S.C(+57.02)HTAVDR.T	Y	29.25	857.381	-4	429.696	2	3.83	6	Carbamidomethylation
sp|P02788|TRFL_HUMAN	S.C(+57.02)HTAVDR.T	Y	29.25	857.381	-4	429.696	2	3.83	6	Carbamidomethylation
tr|C9JV77|C9JV77_HUMAN	G.KFSVVYAKCDSSPADSAEDVR.K	Y	29.18	2273.06	1	758.696	3	24.7	2
tr|C9JV77|C9JV77_HUMAN	K.QYGFC(+57.02)K.A	N	29.11	801.348	-3.5	401.68	2	11.17	2	Carbamidomethylation
tr|A0A0C4DGB6|A0A0C4DGB6_HUMAN	K.C(+57.02)C(+57.02)TESLVNRRPC(+57.02)F.S	N	29.08	1697.74	5.7	849.884	2	18.22	2	Carbamidomethylation
sp|P02768|ALBU_HUMAN	K.C(+57.02)C(+57.02)TESLVNRRPC(+57.02)F.S	N	29.08	1697.74	5.7	849.884	2	18.22	2	Carbamidomethylation
tr|A0A087WWT3|A0A087WWT3_HUMAN	K.C(+57.02)C(+57.02)TESLVNRRPC(+57.02)F.S	N	29.08	1697.74	5.7	849.884	2	18.22	2	Carbamidomethylation
tr|A0A0C4DGB6|A0A0C4DGB6_HUMAN	Y.LYEIARR.H	N	28.96	919.524	-0.8	460.769	2	15.66	2
sp|P02768|ALBU_HUMAN	Y.LYEIARR.H	N	28.96	919.524	-0.8	460.769	2	15.66	2
tr|H7C013|H7C013_HUMAN	Y.LYEIARR.H	N	28.96	919.524	-0.8	460.769	2	15.66	2
tr|G3XAP6|G3XAP6_HUMAN	R.LLWKDPR.N	Y	28.85	926.534	2	464.275	2	16.4	1
sp|P49747|COMP_HUMAN	R.LLWKDPR.N	Y	28.85	926.534	2	464.275	2	16.4	1
sp|P02771|FETA_HUMAN	F.IYEIARR.H	N	28.79	919.524	-0.8	460.769	2	15.66	2
tr|J3KMX3|J3KMX3_HUMAN	F.IYEIARR.H	N	28.79	919.524	-0.8	460.769	2	15.66	2
sp|P02787|TRFE_HUMAN	S.C(+57.02)HTGLGR.S	Y	28.78	799.376	-3.9	400.694	2	5.81	2	Carbamidomethylation
tr|C9JVG0|C9JVG0_HUMAN	S.C(+57.02)HTGLGR.S	Y	28.78	799.376	-3.9	400.694	2	5.81	2	Carbamidomethylation
sp|P43652|AFAM_HUMAN	R.FLVNLVK.L	Y	28.69	831.522	-2.4	416.767	2	24.46	1
sp|Q03181|PPARD_HUMAN	R.ELTEFAK.S	Y	28.39	836.428	0.9	419.222	2	14.11	1
sp|Q07869|PPARA_HUMAN	T.ELTEFAK.A	Y	28.39	836.428	0.9	419.222	2	14.11	1
sp|P10643|CO7_HUMAN	R.ILPLTVC(+57.02)K.M	Y	28.36	942.557	1	472.286	2	20.9	1	Carbamidomethylation
tr|A0A0C4DGB6|A0A0C4DGB6_HUMAN	K.YIC(+57.02)ENQDSISSKLKEC(+57.02)C(+57.02).E	N	28.21	2132.92	-2.5	711.978	3	16.72	1	Carbamidomethylation
sp|P02768|ALBU_HUMAN	K.YIC(+57.02)ENQDSISSKLKEC(+57.02)C(+57.02).E	N	28.21	2132.92	-2.5	711.978	3	16.72	1	Carbamidomethylation
sp|P02749|APOH_HUMAN	K.VSFFC(+57.02)K.N	Y	28.15	786.373	1.1	394.194	2	16.95	2	Carbamidomethylation
tr|A0A0G2JL54|A0A0G2JL54_HUMAN	K.AAAN(+.98)QMRNFLVR.A	Y	27.99	1390.71	15.8	696.375	2	16.27	2	Deamidation (NQ)
tr|A0A140TA29|A0A140TA29_HUMAN	K.AAAN(+.98)QMRNFLVR.A	Y	27.99	1390.71	15.8	696.375	2	16.27	2	Deamidation (NQ)
tr|A0A140TA44|A0A140TA44_HUMAN	K.AAAN(+.98)QMRNFLVR.A	Y	27.99	1390.71	15.8	696.375	2	16.27	2	Deamidation (NQ)
tr|A0A140TA32|A0A140TA32_HUMAN	K.AAAN(+.98)QMRNFLVR.A	Y	27.99	1390.71	15.8	696.375	2	16.27	2	Deamidation (NQ)
tr|A0A140TA49|A0A140TA49_HUMAN	K.AAAN(+.98)QMRNFLVR.A	Y	27.99	1390.71	15.8	696.375	2	16.27	2	Deamidation (NQ)
tr|F5GXS0|F5GXS0_HUMAN	K.AAAN(+.98)QMRNFLVR.A	Y	27.99	1390.71	15.8	696.375	2	16.27	2	Deamidation (NQ)
tr|A0A0G2JPR0|A0A0G2JPR0_HUMAN	K.AAAN(+.98)QMRNFLVR.A	Y	27.99	1390.71	15.8	696.375	2	16.27	2	Deamidation (NQ)
sp|P0C0L4|CO4A_HUMAN	K.AAAN(+.98)QMRNFLVR.A	Y	27.99	1390.71	15.8	696.375	2	16.27	2	Deamidation (NQ)
sp|P0C0L5|CO4B_HUMAN	K.AAAN(+.98)QMRNFLVR.A	Y	27.99	1390.71	15.8	696.375	2	16.27	2	Deamidation (NQ)
tr|A0A0C4DGB6|A0A0C4DGB6_HUMAN	Q.LC(+57.02)VLHEK.T	N	27.98	897.474	0.7	449.745	2	11.83	5	Carbamidomethylation
sp|P02768|ALBU_HUMAN	Q.LC(+57.02)VLHEK.T	N	27.98	897.474	0.7	449.745	2	11.83	5	Carbamidomethylation
tr|A0A087WWT3|A0A087WWT3_HUMAN	Q.LC(+57.02)VLHEK.T	N	27.98	897.474	0.7	449.745	2	11.83	5	Carbamidomethylation
tr|A0A0C4DGB6|A0A0C4DGB6_HUMAN	K.ALVLIAFAQ(+.98)YLQ(+.98)QC(+57.02)PFEDHVK.L	Y	27.42	2491.25	8	831.429	3	35.73	9	Deamidation (NQ); Carbamidomethylation
sp|P02768|ALBU_HUMAN	K.ALVLIAFAQ(+.98)YLQ(+.98)QC(+57.02)PFEDHVK.L	Y	27.42	2491.25	8	831.429	3	35.73	9	Deamidation (NQ); Carbamidomethylation
tr|A0A087WWT3|A0A087WWT3_HUMAN	K.ALVLIAFAQ(+.98)YLQ(+.98)QC(+57.02)PFEDHVK.L	Y	27.42	2491.25	8	831.429	3	35.73	9	Deamidation (NQ); Carbamidomethylation
tr|H7C013|H7C013_HUMAN	K.ALVLIAFAQ(+.98)YLQ(+.98)QC(+57.02)PFEDHVK.L	Y	27.42	2491.25	8	831.429	3	35.73	9	Deamidation (NQ); Carbamidomethylation
tr|A0A0C4DGB6|A0A0C4DGB6_HUMAN	K.KVPQVSTPTLVEV.S	N	27.3	1395.8	8.9	698.912	2	25	2
sp|P02768|ALBU_HUMAN	K.KVPQVSTPTLVEV.S	N	27.3	1395.8	8.9	698.912	2	25	2
tr|A0A087WWT3|A0A087WWT3_HUMAN	K.KVPQVSTPTLVEV.S	N	27.3	1395.8	8.9	698.912	2	25	2
tr|A0A0C4DGB6|A0A0C4DGB6_HUMAN	Q.LCVLHEK.T	N	27.18	840.453	-3.2	421.232	2	11.83	1
sp|P02768|ALBU_HUMAN	Q.LCVLHEK.T	N	27.18	840.453	-3.2	421.232	2	11.83	1
sp|P02765|FETUA_HUMAN	V.YAK(+42.01)C(+57.02)DSSPDSAEDVRK.V	Y	27.17	1868.82	-74.3	935.348	2	7.58	2	Acetylation (K); Carbamidomethylation
sp|P36955|PEDF_HUMAN	K.SYGTRPR.V	Y	26.74	835.43	0.2	418.722	2	5.47	2
tr|Q5T3Q7|Q5T3Q7_HUMAN	K.IAIYLSKSGIC(+57.02)S.L	Y	26.67	1310.69	17.1	656.364	2	21.39	6	Carbamidomethylation
sp|Q9H583|HEAT1_HUMAN	K.IAIYLSKSGIC(+57.02)S.L	Y	26.67	1310.69	17.1	656.364	2	21.39	6	Carbamidomethylation
sp|P02765|FETUA_HUMAN	A.HYDLR.H	N	26.66	702.345	-2.5	352.179	2	8.2	9
tr|C9JV77|C9JV77_HUMAN	A.HYDLR.H	N	26.66	702.345	-2.5	352.179	2	8.2	9
sp|P02771|FETA_HUMAN	K.RSC(+57.02)GLFQK.L	Y	26.66	994.502	3.2	498.26	2	11.57	3	Carbamidomethylation
tr|J3KMX3|J3KMX3_HUMAN	K.RSC(+57.02)GLFQK.L	Y	26.66	994.502	3.2	498.26	2	11.57	3	Carbamidomethylation
sp|Q9Y5B9|SP16H_HUMAN	E.QKGEQQIQK.A	Y	26.63	1085.58	32	543.816	2	24.02	3
sp|P02787|TRFE_HUMAN	K.GKKSC(+57.02)HTAVGR.T	Y	26.41	1199.62	-8.3	600.812	2	2.76	1	Carbamidomethylation
tr|H7C5E8|H7C5E8_HUMAN	K.GKKSC(+57.02)HTAVGR.T	Y	26.41	1199.62	-8.3	600.812	2	2.76	1	Carbamidomethylation
tr|A0A0C4DGB6|A0A0C4DGB6_HUMAN	A.LVELVK.H	N	26.3	699.453	-2	350.733	2	15.6	3
sp|P02768|ALBU_HUMAN	A.LVELVK.H	N	26.3	699.453	-2	350.733	2	15.6	3
tr|A0A087WWT3|A0A087WWT3_HUMAN	A.LVELVK.H	N	26.3	699.453	-2	350.733	2	15.6	3
tr|G3V2B9|G3V2B9_HUMAN	G.TK(+42.01)ADTHDEILEGLNFNLTEIPEAQIHEGFQELLR.T	Y	26.27	3961.97	-0.1	793.401	5	32.94	13	Acetylation (K)
tr|A0A0G2JRN3|A0A0G2JRN3_HUMAN	G.TK(+42.01)ADTHDEILEGLNFNLTEIPEAQIHEGFQELLR.T	Y	26.27	3961.97	-0.1	793.401	5	32.94	13	Acetylation (K)
tr|A0A024R6I7|A0A024R6I7_HUMAN	G.TK(+42.01)ADTHDEILEGLNFNLTEIPEAQIHEGFQELLR.T	Y	26.27	3961.97	-0.1	793.401	5	32.94	13	Acetylation (K)
sp|P01009|A1AT_HUMAN	G.TK(+42.01)ADTHDEILEGLNFNLTEIPEAQIHEGFQELLR.T	Y	26.27	3961.97	-0.1	793.401	5	32.94	13	Acetylation (K)
tr|Q5T985|Q5T985_HUMAN	K.VQSTITSR.M	Y	26.24	890.482	0.5	446.248	2	5.11	2
tr|A0A087WTE1|A0A087WTE1_HUMAN	K.VQSTITSR.M	Y	26.24	890.482	0.5	446.248	2	5.11	2
sp|P19823|ITIH2_HUMAN	K.VQSTITSR.M	Y	26.24	890.482	0.5	446.248	2	5.11	2
tr|A0A0C4DGB6|A0A0C4DGB6_HUMAN	K.C(+57.02)ASLQK.F	N	26.2	705.348	-4.4	353.68	2	5.18	20	Carbamidomethylation
sp|P02768|ALBU_HUMAN	K.C(+57.02)ASLQK.F	N	26.2	705.348	-4.4	353.68	2	5.18	20	Carbamidomethylation
tr|A0A0C4DGB6|A0A0C4DGB6_HUMAN	K.YIC(+57.02)EN(+.98)QDSISSK(-.98).L	N	26.11	1442.63	1.6	722.326	2	11.51	1	Carbamidomethylation; Deamidation (NQ); Amidation
sp|P02768|ALBU_HUMAN	K.YIC(+57.02)EN(+.98)QDSISSK(-.98).L	N	26.11	1442.63	1.6	722.326	2	11.51	1	Carbamidomethylation; Deamidation (NQ); Amidation
sp|P36955|PEDF_HUMAN	H.LTFPLDYHLNQPFIFVLRDTDTGALLFIGK.I	Y	26.02	3463.85	18.2	866.987	4	42.13	2
sp|P02771|FETA_HUMAN	K.LGEYYLQNAFLVAY.T	Y	25.95	1662.83	7.8	832.428	2	33.64	1
tr|A0A0C4DGB6|A0A0C4DGB6_HUMAN	K.C(+57.02)C(+57.02)TESLVNR(-.98).R	N	25.84	1136.51	22.7	569.274	2	10.51	1	Carbamidomethylation; Amidation
sp|P02768|ALBU_HUMAN	K.C(+57.02)C(+57.02)TESLVNR(-.98).R	N	25.84	1136.51	22.7	569.274	2	10.51	1	Carbamidomethylation; Amidation
tr|A0A0C4DGB6|A0A0C4DGB6_HUMAN	A.SLQKFGER.A	N	25.74	963.514	1.2	482.765	2	13.52	8
sp|P02768|ALBU_HUMAN	A.SLQKFGER.A	N	25.74	963.514	1.2	482.765	2	13.52	8
tr|A0A087WW43|A0A087WW43_HUMAN	R.HKGKYEMYLK.V	Y	25.47	1295.67	3.6	648.844	2	10.9	1
tr|E7ET33|E7ET33_HUMAN	R.HKGKYEMYLK.V	Y	25.47	1295.67	3.6	648.844	2	10.9	1
sp|Q06033|ITIH3_HUMAN	R.HKGKYEMYLK.V	Y	25.47	1295.67	3.6	648.844	2	10.9	1
sp|Q7LBC6|KDM3B_HUMAN	S.ADSASLAKK.K	Y	25.44	889.487	19.8	445.76	2	9.37	3
tr|A0A0C4DGB6|A0A0C4DGB6_HUMAN	K.KVPQVSTPT.L	N	24.56	955.534	1.8	478.775	2	13.36	2
sp|P02768|ALBU_HUMAN	K.KVPQVSTPT.L	N	24.56	955.534	1.8	478.775	2	13.36	2
tr|A0A087WWT3|A0A087WWT3_HUMAN	K.KVPQVSTPT.L	N	24.56	955.534	1.8	478.775	2	13.36	2
sp|P01023|A2MG_HUMAN	Q.TVSWAVTPK.S	Y	24.05	987.539	5.3	494.779	2	18.22	2
tr|A0A0A0MT56|A0A0A0MT56_HUMAN	E.ATEEQLK.D	Y	23.2	817.418	-4.4	409.714	2	6.05	3
tr|E9PID8|E9PID8_HUMAN	E.ATEEQLK.D	Y	23.2	817.418	-4.4	409.714	2	6.05	3
sp|P33240|CSTF2_HUMAN	E.ATEEQLK.D	Y	23.2	817.418	-4.4	409.714	2	6.05	3
tr|E7EWR4|E7EWR4_HUMAN	E.ATEEQLK.D	Y	23.2	817.418	-4.4	409.714	2	6.05	3
sp|Q9H0L4|CSTFT_HUMAN	E.ATEEQLK.D	Y	23.2	817.418	-4.4	409.714	2	6.05	3
tr|B1ALB4|B1ALB4_HUMAN	K.TPVSEARKT.P	Y	22.9	987.535	26.2	494.788	2	7.75	2
sp|Q92540|SMG7_HUMAN	K.TPVSEARKT.P	Y	22.9	987.535	26.2	494.788	2	7.75	2
tr|E9PD50|E9PD50_HUMAN	K.TPVSEARKT.P	Y	22.9	987.535	26.2	494.788	2	7.75	2
sp|P02771|FETA_HUMAN	R.AALGV	N	22.71	429.259	0.9	430.266	1	13.65	1
tr|A0A0C4DGB6|A0A0C4DGB6_HUMAN	K.SLHTLFGDKLC(+57.02)TVATLRETYGEMAD.C	Y	22.64	2827.35	4.4	943.462	3	30.85	1	Carbamidomethylation
sp|P02768|ALBU_HUMAN	K.SLHTLFGDKLC(+57.02)TVATLRETYGEMAD.C	Y	22.64	2827.35	4.4	943.462	3	30.85	1	Carbamidomethylation
tr|A0A087WWT3|A0A087WWT3_HUMAN	K.SLHTLFGDKLC(+57.02)TVATLRETYGEMAD.C	Y	22.64	2827.35	4.4	943.462	3	30.85	1	Carbamidomethylation
tr|H7C013|H7C013_HUMAN	K.SLHTLFGDKLC(+57.02)TVATLRETYGEMAD.C	Y	22.64	2827.35	4.4	943.462	3	30.85	1	Carbamidomethylation
tr|A0A0C4DGB6|A0A0C4DGB6_HUMAN	L.C(+57.02)VLHEK.T	N	22.61	784.39	-6.1	393.2	2	12.06	1	Carbamidomethylation
sp|P02768|ALBU_HUMAN	L.C(+57.02)VLHEK.T	N	22.61	784.39	-6.1	393.2	2	12.06	1	Carbamidomethylation
tr|A0A087WWT3|A0A087WWT3_HUMAN	L.C(+57.02)VLHEK.T	N	22.61	784.39	-6.1	393.2	2	12.06	1	Carbamidomethylation
tr|K7ERJ6|K7ERJ6_HUMAN	S.AIVPLIIR.S	Y	22.2	893.606	0	447.81	2	28.52	4
sp|Q9H7M6|ZSWM4_HUMAN	S.AIVPLIIR.S	Y	22.2	893.606	0	447.81	2	28.52	4
sp|Q9Y2W1|TR150_HUMAN	R.KSSTSPK.W	Y	22.11	733.397	13	367.711	2	10.42	5
sp|Q9Y2I6|NINL_HUMAN	L.HLEDVVR.A	Y	21.54	866.461	-0.9	434.237	2	12.9	1
tr|A0A087WUT6|A0A087WUT6_HUMAN	G.IVTSIEINHK.Q	Y	21.31	1152.65	34	577.352	2	14.56	1
sp|O60841|IF2P_HUMAN	G.IVTSIEINHK.Q	Y	21.31	1152.65	34	577.352	2	14.56	1
tr|H0YGW7|H0YGW7_HUMAN	Y.QQKQKELLK.Q	Y	21.09	1141.68	27.9	571.864	2	22.64	4
sp|Q8NE71|ABCF1_HUMAN	Y.QQKQKELLK.Q	Y	21.09	1141.68	27.9	571.864	2	22.64	4
tr|A0A0C4DGB6|A0A0C4DGB6_HUMAN	N.LGKVGSK(+42.01).C	N	21.08	729.438	9.3	365.73	2	6.89	6	Acetylation (K)
sp|P02768|ALBU_HUMAN	N.LGKVGSK(+42.01).C	N	21.08	729.438	9.3	365.73	2	6.89	6	Acetylation (K)
tr|A0A087WWT3|A0A087WWT3_HUMAN	N.LGKVGSK(+42.01).C	N	21.08	729.438	9.3	365.73	2	6.89	6	Acetylation (K)
tr|A0A0A0MRF6|A0A0A0MRF6_HUMAN	A.QTKLELETTLK.A	Y	20.85	1302.74	21.5	652.391	2	23.04	3
sp|Q99996|AKAP9_HUMAN	A.QTKLELETTLK.A	Y	20.85	1302.74	21.5	652.391	2	23.04	3
tr|H7BYL6|H7BYL6_HUMAN	A.QTKLELETTLK.A	Y	20.85	1302.74	21.5	652.391	2	23.04	3
sp|Q12802|AKP13_HUMAN	V.VGPVSLPR.R	Y	20.79	823.492	-0.5	412.753	2	16.88	2
tr|A0A087WTD7|A0A087WTD7_HUMAN	V.VGPVSLPR.R	Y	20.79	823.492	-0.5	412.753	2	16.88	2
tr|A8MYJ1|A8MYJ1_HUMAN	V.VGPVSLPR.R	Y	20.79	823.492	-0.5	412.753	2	16.88	2
sp|O94805|ACL6B_HUMAN	K.EKLPQVSK.S	Y	20.62	927.539	1.7	464.777	2	9.24	2
tr|A0A0C4DGB6|A0A0C4DGB6_HUMAN	S.LQKFGER.A	N	20.61	876.482	-0.7	439.248	2	13.56	3
sp|P02768|ALBU_HUMAN	S.LQKFGER.A	N	20.61	876.482	-0.7	439.248	2	13.56	3

## Sheet: control_denovo_peps
Peptide	Tag length	ALC (%)	m/z	z	RT	Mass	ppm	PTM	local confidence (%)	tag (>=0%)	mode
HAEDKLLTR	9	99	541.802	2	9.01	1081.59	0.9		99 100 100 100 99 99 100 99 100	HAEDKLLTR	CID
LSQKFPKAEFVEVTKLVTDLTK	22	99	631.114	4	31.92	2520.42	1.8		99 99 99 99 100 100 100 100 100 100 100 100 100 99 100 100 99 99 99 99 99 100	LSQKFPKAEFVEVTKLVTDLTK	CID
LKEC(+57.02)C(+57.02)DKPLLEK	12	99	511.599	3	12.53	1531.77	1.2	Carbamidomethylation	98 98 100 100 99 100 99 99 99 99 100 100	LKEC(+57.02)C(+57.02)DKPLLEK	CID
LLGNVLVVVLAR	12	99	633.42	2	35.28	1264.82	1.7		99 99 99 99 99 100 100 100 99 99 99 99	LLGNVLVVVLAR	CID
TPVSEKVTK	9	99	494.788	2	7.81	987.56	0.3		100 100 100 99 99 98 99 99 100	TPVSEKVTK	CID
TC(+57.02)VADESHAGC(+57.02)EK	13	99	732.301	2	7.03	1462.58	4.3	Carbamidomethylation	98 99 100 100 100 100 100 99 100 97 98 99 99	TC(+57.02)VADESHAGC(+57.02)EK	CID
HTKLAVPLLLR	11	99	630.912	2	23.62	1259.81	1.7		98 99 99 100 99 99 97 99 99 100 100	HTKLAVPLLLR	CID
LSQKFPKAEFVEVTK	15	99	584.33	3	19.41	1749.97	1.1		99 99 98 98 99 99 99 99 100 99 99 100 99 100 100	LSQKFPKAEFVEVTK	CID
AALTLDEK	8	99	430.74	2	13.37	859.465	0		99 99 100 99 99 99 99 98	AALTLDEK	CID
LAVPLLLR	8	99	447.81	2	28.11	893.606	-1.4		97 97 99 99 100 100 100 100	LAVPLLLR	CID
KYASSANLHLPK	12	99	443.582	3	14.56	1327.72	-0.4		98 99 99 100 99 99 98 99 98 100 100 100	KYASSANLHLPK	CID
DTHKSELAHR	10	99	597.305	2	3.35	1192.6	0.4		98 98 99 99 99 99 99 99 99 100	DTHKSELAHR	CID
HPEYAVSVLLR	11	99	642.36	2	23.14	1282.7	1.2		99 99 100 99 99 99 98 98 99 100 100	HPEYAVSVLLR	CID
C(+57.02)C(+57.02)TKPESER	9	99	583.75	2	3.85	1165.49	-0.4	Carbamidomethylation	99 99 99 99 98 99 98 99 100	C(+57.02)C(+57.02)TKPESER	CID
LPEVFLTK	8	99	473.783	2	22.89	945.553	-1.4		100 99 100 99 99 100 99 100	LPEVFLTK	CID
LSKQFPKAEFVEVTK	15	99	584.334	3	20.02	1749.97	7.7		99 99 99 99 100 99 99 99 100 99 99 100 99 99 100	LSKQFPKAEFVEVTK	CID
KLEC(+57.02)C(+57.02)DKPLLEK	12	99	766.902	2	12.78	1531.77	10.7	Carbamidomethylation	95 98 100 100 99 100 99 99 99 99 100 100	KLEC(+57.02)C(+57.02)DKPLLEK	CID
LSLSETYDLK	10	98	584.81	2	20.01	1167.6	3		98 98 100 99 99 98 99 99 99 99	LSLSETYDLK	CID
QEEQLVPR	8	98	499.767	2	14.12	997.519	0		95 99 100 98 99 100 100 100	QEEQLVPR	CID
LSKQFPKAEFVEVTKLVTDLTK	22	98	631.114	4	32.02	2520.42	2.5		98 98 98 97 99 99 99 99 100 99 99 100 100 99 99 99 98 96 99 99 99 100	LSKQFPKAEFVEVTKLVTDLTK	CID
C(+57.02)LASLAK	7	98	381.712	2	12.57	761.41	-1.6	Carbamidomethylation	97 99 99 99 99 99 99	C(+57.02)LASLAK	CID
AAVTSLFAK	9	98	454.265	2	20.32	906.518	-1.8		99 99 99 99 96 98 99 99 100	AAVTSLFAK	CID
VLSAADKGNVK	11	98	551.318	2	8.62	1100.62	2.1		99 99 100 100 99 100 99 97 96 98 99	VLSAADKGNVK	CID
FFKKFFKKFFKK	12	98	418.255	4	19.23	1668.99	-0.4		98 99 99 100 99 98 98 99 98 98 98 100	FFKKFFKKFFKK	CID
GPQLTR	6	98	336.193	2	7.7	670.376	-6.3		98 98 98 99 99 99	GPQLTR	CID
LLTEDLYQPR	10	98	624.337	2	19.81	1246.66	2.3		99 99 99 100 99 99 99 96 96 99	LLTEDLYQPR	CID
HTLNQLDSVK	10	98	577.813	2	12.34	1153.61	2.1		99 99 99 98 96 98 99 98 99 99	HTLNQLDSVK	CID
LVNELTEFAK	10	98	582.32	2	22.33	1162.62	1.3		98 98 99 100 99 98 99 98 99 99	LVNELTEFAK	CID
HLVDEPQNLLK	11	98	653.364	2	18.81	1304.71	3.3		99 100 100 100 100 97 95 96 98 100 100	HLVDEPQNLLK	CID
KQTALVELLK	10	98	571.863	2	21.97	1141.71	4		96 96 98 98 99 99 100 99 100 100	KQTALVELLK	CID
AHVETLR	7	98	413.231	2	7.9	824.45	-3		97 97 99 99 98 99 100	AHVETLR	CID
HKSELAHR	8	98	489.266	2	2.15	976.52	-3.5		98 99 99 99 98 98 98 100	HKSELAHR	CID
VLLVDGK	7	98	372.235	2	15.15	742.459	-3.4		97 99 99 99 99 97 99	VLLVDGK	CID
ATEEQLKTVMENFVAFVGK	19	98	714.373	3	35.24	2140.09	4.5		96 96 100 100 98 99 99 99 99 99 100 99 99 98 97 97 98 96 99	ATEEQLKTVMENFVAFVGK	CID
THTELLK	7	98	421.242	2	9.84	840.471	-2		97 96 98 99 99 100 100	THTELLK	CID
C(+57.02)TEDYLSLLLNR	12	98	748.875	2	30.24	1495.73	1	Carbamidomethylation	98 99 100 100 100 100 99 99 98 97 93 98	C(+57.02)TEDYLSLLLNR	CID
LLNKQQDDFGK	11	98	653.345	2	11.29	1304.67	1.6		99 99 98 97 97 96 99 99 99 98 100	LLNKQQDDFGK	CID
VANTVLQTK	9	98	487.286	2	11.32	972.56	-1.9		98 99 97 98 99 99 98 97 99	VANTVLQTK	CID
KFWGKYLYELAR	12	98	525.289	3	23.17	1572.85	-0.1		97 99 97 97 99 99 100 100 100 98 96 98	KFWGKYLYELAR	CID
C(+57.02)ASLQKLR	8	98	488.273	2	10.01	974.533	-1.3	Carbamidomethylation	99 99 99 99 95 97 98 99	C(+57.02)ASLQKLR	CID
THKSELAHR	9	98	360.195	3	3.13	1077.57	-4.3		98 98 97 95 97 99 99 99 100	THKSELAHR	CID
AFDEKLFTFHADLC(+57.02)TLPDTEK	21	98	833.407	3	28.29	2497.18	6.5	Carbamidomethylation	97 97 99 100 99 100 99 99 99 99 99 100 99 99 99 99 92 95 95 98 99	AFDEKLFTFHADLC(+57.02)TLPDTEK	CID
VKVDEVGGEALGR	13	98	664.864	2	15.24	1327.71	2.8		96 98 99 100 100 100 98 96 99 98 98 95 100	VKVDEVGGEALGR	CID
ATEEQLK	7	98	409.715	2	6.63	817.418	-3		96 98 100 99 96 99 99	ATEEQLK	CID
ALTVTK	6	98	316.701	2	8.59	631.39	-4.5		96 98 98 99 99 99	ALTVTK	CID
EC(+57.02)C(+57.02)DKPLLEK	10	98	646.306	2	11.64	1290.59	2.2	Carbamidomethylation	98 97 99 99 98 94 98 99 100 100	EC(+57.02)C(+57.02)DKPLLEK	CID
TQEELTPFFK	10	98	620.317	2	24.17	1238.62	0.7		96 96 99 100 98 98 98 98 99 99	TQEELTPFFK	CID
VAAALTK	7	98	337.212	2	9.19	672.417	-11.8		96 98 99 98 98 99 99	VAAALTK	CID
DLGEEHFK	8	98	487.732	2	11.63	973.451	-1.5		96 97 97 99 100 98 98 99	DLGEEHFK	CID
KTALVELLKHKPK	13	98	752.967	2	19.51	1503.95	-20.4		95 97 98 100 98 99 99 100 99 98 99 99 94	KTALVELLKHKPK	CID
WEDC(+57.02)AAKC(+57.02)EEETDFVC(+57.02)R	17	98	735.638	3	16.53	2203.86	13.9	Carbamidomethylation	90 100 99 98 98 99 99 99 99 100 100 97 98 99 98 96 99	WEDC(+57.02)AAKC(+57.02)EEETDFVC(+57.02)R	CID
SDFASK	6	98	327.656	2	5.52	653.302	-5.6		94 98 99 99 99 100	SDFASK	CID
YSLVFLAR	8	98	484.782	2	24.51	967.549	0.8		97 98 100 99 99 98 95 99	YSLVFLAR	CID
LGEYGFQDALLVR	13	98	740.897	2	25.74	1479.77	4.8		95 88 99 99 99 100 99 99 99 99 99 100 100	LGEYGFQDALLVR	CID
KEC(+57.02)C(+57.02)DKPLLEK	11	98	473.904	3	12.42	1418.69	-0.7	Carbamidomethylation	97 99 99 98 99 97 95 98 98 99 100	KEC(+57.02)C(+57.02)DKPLLEK	CID
AEFVEVTK	8	98	461.748	2	14.92	921.481	0.6		94 98 98 98 99 99 99 100	AEFVEVTK	CID
ASEQLKALGEK	11	98	587.328	2	12.24	1172.64	0.7		97 98 100 98 99 98 99 99 93 98 99	ASEQLKALGEK	CID
LVTDLTKVHK	10	98	577.351	2	14.39	1152.69	1.4		98 98 99 99 97 94 97 98 99 100	LVTDLTKVHK	CID
ALFYLNKEK	9	98	563.319	2	16.62	1124.62	1.1		95 97 99 99 99 97 97 98 98	ALFYLNKEK	CID
KPVTDAENC(+57.02)HLAR	13	98	504.252	3	9.6	1509.74	-1.1	Carbamidomethylation	98 99 99 98 99 99 99 97 98 97 97 96 99	KPVTDAENC(+57.02)HLAR	CID
KTALVELLK	9	98	507.815	2	25.22	1013.65	-33.1		93 95 99 99 98 99 99 100 100	KTALVELLK	CID
TPVSEK	6	98	330.678	2	4.27	659.349	-10.6		99 99 97 96 99 98	TPVSEK	CID
HLEVDVR	7	98	434.237	2	12.72	866.461	-2.3		96 98 99 96 98 99 100	HLEVDVR	CID
KDLGEEHFK	9	98	368.188	3	13.76	1101.55	-1.5		96 99 99 95 99 100 98 98 99	KDLGEEHFK	CID
SELAHR	6	98	356.689	2	3.13	711.366	-4.5		93 98 99 99 99 100	SELAHR	CID
ATEEQLKTVMENFVAFVDK	19	98	733.709	3	35.98	2198.09	5		95 96 100 100 98 99 99 99 99 99 100 99 99 98 96 95 96 98 97	ATEEQLKTVMENFVAFVDK	CID
KKFFKKFFKK	10	98	459.294	3	19.71	1374.85	3.6		98 99 99 99 99 99 98 97 98 100	KKFFKKFFKK	CID
LC(+57.02)VLHEKTPVSEKVTK	16	98	623.352	3	15.12	1867.02	6.2	Carbamidomethylation	98 99 100 100 99 99 100 100 99 99 96 97 96 98 99 100	LC(+57.02)VLHEKTPVSEKVTK	CID
KFKFFKKFFKK	11	98	381.488	4	19.61	1521.92	0.8		98 99 99 99 99 98 99 99 97 98 100	KFKFFKKFFKK	CID
SVEDC(+57.02)AAKC(+57.02)EEETDFVC(+57.02)R	18	98	735.641	3	16.72	2203.88	8.3	Carbamidomethylation	95 96 100 100 99 99 99 99 99 100 100 100 99 99 99 96 96 99	SVEDC(+57.02)AAKC(+57.02)EEETDFVC(+57.02)R	CID
MLSAEEKAALTSLFAK	16	98	855.474	2	27.5	1708.91	15		92 99 99 99 100 100 99 99 99 99 98 97 99 98 99 100	MLSAEEKAALTSLFAK	CID
LETMR	5	98	325.167	2	7.63	648.327	-10.2		97 99 99 98 100	LETMR	CID
SPLFVGK	7	98	374.223	2	16.38	746.433	-2.1		97 97 99 99 99 99 100	SPLFVGK	CID
ALGGEDVR	8	98	408.713	2	9.28	815.414	-2.3		97 98 98 96 99 99 99 100	ALGGEDVR	CID
LC(+57.02)VLHEKTPVSEK	13	98	770.422	2	14.92	1538.81	10.5	Carbamidomethylation	97 97 99 100 100 100 99 99 97 96 97 99 99	LC(+57.02)VLHEKTPVSEK	CID
ALFYLNKEKR	10	98	641.375	2	14.97	1280.72	8.1		96 98 99 100 100 98 96 98 99 100	ALFYLNKEKR	CID
LETMREKVLTSSAR	14	98	540.966	3	13.92	1619.87	5.1		99 99 99 95 98 99 98 100 100 100 99 96 96 99	LETMREKVLTSSAR	CID
LLESGPFVSC(+57.02)VKK	13	98	488.604	3	19.62	1462.79	3.7	Carbamidomethylation	99 99 100 99 98 98 98 98 97 97 95 98 99	LLESGPFVSC(+57.02)VKK	CID
DSVKVWPR	8	98	493.776	2	20.17	985.534	3.3		97 97 99 98 98 98 99 100	DSVKVWPR	CID
HYDLR	5	98	352.178	2	8.43	702.345	-5.9		94 98 99 100 100	HYDLR	CID
QVPQVSTPTLVEVSRSLGK	19	98	675.735	3	24.25	2024.13	28.6		98 100 99 99 100 99 99 100 100 100 100 100 98 94 95 93 96 97 100	QVPQVSTPTLVEVSRSLGK	CID
FALVR	5	98	303.188	2	16.73	604.37	-12.1		96 97 99 99 100	FALVR	CID
VLTEDLYQPR	10	98	617.332	2	18.38	1232.64	7.5		97 99 99 100 98 98 99 97 95 99	VLTEDLYQPR	CID
FFKKFFKKFFKKFFKK	16	98	740.789	3	23.4	2219.32	12.9		95 95 99 99 98 97 97 100 100 99 99 98 98 98 99 99	FFKKFFKKFFKKFFKK	CID
FKDLGEEHFK	10	98	625.318	2	14.06	1248.61	5.9		94 96 100 100 95 99 100 98 99 100	FKDLGEEHFK	CID
YEYELAR	7	98	472.247	2	17.87	942.445	37.5		98 98 99 99 97 97 98	YEYELAR	CID
KAPQLTSPELMALTR	15	98	828.473	2	24.8	1654.91	15		97 99 99 98 100 100 100 98 99 99 93 97 98 95 98	KAPQLTSPELMALTR	CID
KFDLGEEHFK	10	98	625.317	2	14.11	1248.61	5.2		93 96 100 100 95 99 100 98 99 100	KFDLGEEHFK	CID
C(+57.02)LVER	5	98	338.673	2	7.21	675.337	-10.4	Carbamidomethylation	96 99 99 100 100	C(+57.02)LVER	CID
QSDLLFRDDTK	11	98	669.362	2	13.9	1336.66	36		94 98 99 99 99 98 98 98 98 99 99	QSDLLFRDDTK	CID
ALHKAALTLDEK	12	98	655.383	2	12.7	1308.74	9.2		95 97 98 99 99 99 99 98 98 98 99 98	ALHKAALTLDEK	CID
C(+57.02)LASLAKK	8	98	445.759	2	9.42	889.505	-2.2	Carbamidomethylation	96 99 99 98 98 98 97 99	C(+57.02)LASLAKK	CID
KFFKFFKKFFKKFFKK	16	98	740.792	3	22.85	2219.32	15.9		92 95 94 98 99 98 98 100 100 100 99 99 99 99 99 100	KFFKFFKKFFKKFFKK	CID
KSELAHR	7	97	420.738	2	3.09	839.461	-0.9		96 99 99 98 96 98 100	KSELAHR	CID
SSANLHLPK	9	97	483.772	2	15.91	965.529	0.9		98 98 99 97 98 98 100 95 99	SSANLHLPK	CID
LLESTLK	7	97	402.247	2	13.71	802.48	-1.4		99 99 99 95 95 99 99	LLESTLK	CID
HFSLLTLMTNR	11	97	666.86	2	28.19	1331.7	3.1		98 99 99 100 100 99 99 94 95 94 99	HFSLLTLMTNR	CID
VAVPLPLHR	9	97	501.317	2	24.07	1000.62	1.7		94 95 99 99 100 97 99 98 100	VAVPLPLHR	CID
RLQGHAVQETDDTSHQEAAC(+57.02)HK	22	97	630.291	4	11.19	2517.14	-2.2	Carbamidomethylation	97 100 99 97 98 100 100 99 100 99 99 98 93 95 96 96 99 98 98 98 95 99	RLQGHAVQETDDTSHQEAAC(+57.02)HK	CID
KTQLPEVFLTK	11	97	652.387	2	22.68	1302.75	4.1		96 97 95 99 96 98 98 99 99 99 100	KTQLPEVFLTK	CID
TYDSYLGDDYVR	12	97	733.828	2	19.07	1465.64	3.3		96 96 100 99 100 100 97 99 98 96 95 99	TYDSYLGDDYVR	CID
LVELVK	6	97	350.733	2	15.65	699.453	-3.6		97 97 99 97 97 98	LVELVK	CID
KAWSVAR	7	97	409.237	2	15.2	816.461	-1.3		96 99 97 97 98 98 99	KAWSVAR	CID
C(+57.02)VLHEK	6	97	393.202	2	11.78	784.39	-2.1	Carbamidomethylation	94 97 99 98 99 99	C(+57.02)VLHEK	CID
GPNHAVVSR	9	97	468.752	2	6.46	935.494	-3.7		95 93 98 98 99 99 99 99 100	GPNHAVVSR	CID
VSEKVTK	7	97	395.736	2	7.8	789.46	-2.7		96 97 98 95 98 99 99	VSEKVTK	CID
GSELQTQAK	9	97	481.25	2	7.11	960.488	-1.4		91 97 100 100 98 98 97 98 100	GSELQTQAK	CID
FTYEYSR	7	97	483.223	2	13.43	964.429	1.7		96 97 99 100 98 95 97	FTYEYSR	CID
FKFKFFKKFFKK	12	97	418.255	4	19.38	1668.99	-0.2		95 95 98 99 99 98 98 99 98 97 97 99	FKFKFFKKFFKK	CID
LC(+57.02)QLC(+57.02)AGK	8	97	475.233	2	10.83	948.452	-1.2	Carbamidomethylation	97 97 98 98 97 98 96 100	LC(+57.02)QLC(+57.02)AGK	CID
C(+57.02)C(+57.02)AADDKEAC(+57.02)FAVEGPK	17	97	643.272	3	15.68	1926.79	2.2	Carbamidomethylation	99 99 100 99 99 99 98 99 99 99 99 97 94 97 89 93 98	C(+57.02)C(+57.02)AADDKEAC(+57.02)FAVEGPK	CID
LLESGPFVSC(+57.02)VK	12	97	668.355	2	21.63	1334.69	4.1	Carbamidomethylation	99 99 100 100 97 96 97 97 98 96 95 98	LLESGPFVSC(+57.02)VK	CID
KLASFLPPLEK	11	97	621.877	2	22.98	1241.74	1.7		95 97 98 98 98 99 98 96 96 98 98	KLASFLPPLEK	CID
TAGLVR	6	97	308.69	2	8.49	615.37	-6.5		96 97 96 99 98 99	TAGLVR	CID
AMTNLRQC(+57.02)STSK	12	97	698.839	2	9.07	1395.66	2.7	Carbamidomethylation	96 91 99 98 99 98 96 98 97 98 99 100	AMTNLRQC(+57.02)STSK	CID
LSHLLK	6	97	355.73	2	10.39	709.449	-3.6		96 96 96 98 99 99	LSHLLK	CID
KLAER	5	97	308.689	2	2.63	615.37	-11.1		96 99 95 99 99	KLAER	CID
TDLTKVHK	8	97	471.273	2	14.37	940.534	-2.3		94 97 99 97 96 99 99 100	TDLTKVHK	CID
VADESHAGC(+57.02)EK	11	97	601.759	2	7.07	1201.5	-0.2	Carbamidomethylation	96 97 99 100 98 96 98 94 96 98 98	VADESHAGC(+57.02)EK	CID
FAHNVVTTR	9	97	522.783	2	10.75	1043.55	-0.6		95 97 97 99 99 99 97 96 99	FAHNVVTTR	CID
LYGNQDTSVQLKK	13	97	498.603	3	13.27	1492.79	-0.7		99 99 99 98 98 99 98 96 95 91 98 97 100	LYGNQDTSVQLKK	CID
LLWESASLLR	10	97	594.343	2	27.37	1186.67	0.7		98 98 98 99 99 98 97 93 95 98	LLWESASLLR	CID
YASSANLHLPK	11	97	600.824	2	15.97	1199.63	3.2		99 99 100 98 96 91 94 97 100 100 100	YASSANLHLPK	CID
FFKKFKFKFFKKFFKK	16	97	555.838	4	23.72	2219.32	2.5		96 96 98 98 97 97 97 98 99 98 97 97 97 96 98 99	FFKKFKFKFFKKFFKK	CID
WLGDVGLTEVFSDR	14	97	797.415	2	29.34	1592.78	20.1		88 99 98 100 99 98 99 99 99 98 97 94 95 99	WLGDVGLTEVFSDR	CID
TC(+57.02)VDLNEC(+57.02)R	9	97	583.75	2	11.59	1165.49	0.7	Carbamidomethylation	96 98 99 99 98 94 98 96 100	TC(+57.02)VDLNEC(+57.02)R	CID
LSAADKGNVK	10	97	501.784	2	8.62	1001.55	3		98 98 99 99 99 98 95 94 96 99	LSAADKGNVK	CID
TALVELLK	8	97	443.783	2	24.76	885.553	-1.5		93 95 99 98 98 97 99 99	TALVELLK	CID
VSQKFPK	7	97	417.248	2	8.61	832.481	-0.1		96 96 96 96 98 99 100	VSQKFPK	CID
QDGQFSVLFTK	11	97	635.33	2	24.12	1268.64	3.7		94 98 95 97 96 96 97 99 99 99 100	QDGQFSVLFTK	CID
LC(+57.02)PGR	5	97	301.656	2	5.91	601.301	-6.4	Carbamidomethylation	96 98 96 97 100	LC(+57.02)PGR	CID
VFFKGSELVVAGK	13	97	460.935	3	21.82	1379.78	0.3		98 98 99 97 92 97 98 99 99 98 96 94 99	VFFKGSELVVAGK	CID
AFDEK	5	97	305.145	2	5.61	608.281	-7.8		95 96 99 99 97	AFDEK	CID
TVMENFVAFVGK	12	97	671.349	2	28.69	1340.68	2.8		92 94 97 100 98 98 99 99 99 99 94 99	TVMENFVAFVGK	CID
DKPLLEK	7	97	421.753	2	10.1	841.491	-0.2		93 94 98 99 99 99 99	DKPLLEK	CID
AGALC(+57.02)LSR	8	97	424.226	2	13.72	846.438	-0.2	Carbamidomethylation	94 93 99 98 98 99 98 99	AGALC(+57.02)LSR	CID
HTLNQLDSVKVWPR	14	97	564.978	3	20.55	1691.91	0.8		99 99 99 96 96 99 100 99 98 96 95 92 92 100	HTLNQLDSVKVWPR	CID
QTALVELLK	9	97	507.815	2	25.37	1013.61	2.6		87 95 99 99 98 99 99 100 100	QTALVELLK	CID
MPC(+57.02)TEDYLSLLLNR	14	97	862.926	2	32.23	1723.83	6.1	Carbamidomethylation	95 93 96 100 100 100 100 100 99 95 96 97 92 98	MPC(+57.02)TEDYLSLLLNR	CID
GNTHTELLK	9	97	506.774	2	9.8	1011.53	-1		89 94 98 98 98 99 99 100 100	GNTHTELLK	CID
WFLGSFLYEYSR	12	97	784.379	2	31.38	1566.75	-4.7		86 97 99 99 99 99 100 99 99 96 94 98	WFLGSFLYEYSR	CID
WC(+57.02)ALGHQER	9	97	578.77	2	11.28	1155.52	0.5	Carbamidomethylation	94 98 99 99 95 95 96 97 99	WC(+57.02)ALGHQER	CID
GSVLQK	6	97	316.19	2	6.56	630.37	-6.9		91 96 99 99 98 100	GSVLQK	CID
KDKATC(+57.02)VEK	9	97	539.78	2	2.6	1077.55	-3.2	Carbamidomethylation	96 99 98 98 97 95 95 98 98	KDKATC(+57.02)VEK	CID
KVLTSSAR	8	97	431.26	2	7.37	860.508	-3.4		95 98 99 97 96 96 96 99	KVLTSSAR	CID
DPERTVR	7	97	436.731	2	5.23	871.451	-3.7		99 94 97 95 96 98 100	DPERTVR	CID
SLDEC(+57.02)C(+57.02)HSESSTAC(+57.02)LNAK	18	97	690.287	3	12.15	2067.83	4.4	Carbamidomethylation	94 96 99 99 99 99 99 98 99 99 99 96 95 97 95 90 95 99	SLDEC(+57.02)C(+57.02)HSESSTAC(+57.02)LNAK	CID
FMETATESLAK	11	97	614.301	2	17.11	1226.59	1		96 93 100 99 99 97 98 97 95 95 98	FMETATESLAK	CID
ALKAWSVAR	9	97	501.299	2	15.32	1000.58	1.9		94 97 96 98 97 97 97 97 100	ALKAWSVAR	CID
VLHEK	5	97	313.185	2	11.77	624.36	-5.3		95 97 97 99 97	VLHEK	CID
EC(+57.02)ALGHQER	9	97	550.259	2	12.18	1098.49	14.1	Carbamidomethylation	92 94 97 99 98 98 97 98 99	EC(+57.02)ALGHQER	CID
AKGSELQTQAK	11	97	580.816	2	6.42	1159.62	-2.5		93 94 94 98 99 99 98 98 96 99 100	AKGSELQTQAK	CID
AALTSLFAK	9	97	461.274	2	23.02	920.533	0		97 98 99 99 97 98 94 92 98	AALTSLFAK	CID
HLGAYELLLK	10	97	578.84	2	23.77	1155.66	-0.1		98 99 95 97 89 93 99 100 100 100	HLGAYELLLK	CID
QNC(+57.02)DQFEKLGEYGFQNALLVR	21	97	843.759	3	28.89	2528.21	17.4	Carbamidomethylation	90 96 99 99 98 99 100 99 99 98 100 100 99 99 95 93 95 99 99 99 100	QNC(+57.02)DQFEKLGEYGFQNALLVR	CID
LSALAAGDGSGYTC(+57.02)R	15	97	749.859	2	15.86	1497.69	9.6	Carbamidomethylation	95 95 98 100 100 100 99 100 97 98 93 97 98 97 99	LSALAAGDGSGYTC(+57.02)R	CID
QKTALVELLK	10	97	571.864	2	22.69	1141.71	4.7		91 97 97 97 99 99 99 99 100 100	QKTALVELLK	CID
EKVLTSSAR	9	97	495.783	2	7.16	989.551	1.8		96 95 99 100 100 99 97 94 99	EKVLTSSAR	CID
SLGKVGTR	8	97	409.247	2	7.15	816.482	-2.1		95 98 98 98 99 97 98 99	SLGKVGTR	CID
LYLLEC(+57.02)K	7	97	469.755	2	19.81	937.494	0.6	Carbamidomethylation	96 96 99 98 99 98 98	LYLLEC(+57.02)K	CID
THTATALAHR	10	97	360.192	3	2.44	1077.57	-11.2		97 98 97 96 96 95 98 99 99 100	THTATALAHR	CID
MLSAEEKAAVTSLFAK	16	97	848.466	2	25.31	1694.89	15.2		78 96 98 99 100 100 100 100 100 99 99 98 99 99 99 100	MLSAEEKAAVTSLFAK	CID
RLC(+57.02)ASLQKFWR	11	97	732.899	2	13.67	1463.78	1.6	Carbamidomethylation	97 98 99 99 99 99 97 97 94 93 100	RLC(+57.02)ASLQKFWR	CID
FFKKKFFKFFKKFFKK	16	97	740.788	3	23.7	2219.32	11.7		95 95 99 99 98 96 97 99 99 99 97 97 96 97 98 99	FFKKKFFKFFKKFFKK	CID
VLTSSAR	7	97	367.213	2	6.35	732.413	-3.1		97 99 99 98 96 96 98	VLTSSAR	CID
QTKLPEVFLTK	11	97	652.391	2	22.99	1302.75	9.2		91 96 97 99 96 98 98 99 99 99 99	QTKLPEVFLTK	CID
DKDLSMAR	8	97	468.235	2	9.05	934.454	0.6		97 96 100 100 99 93 96 99	DKDLSMAR	CID
HLQYELLLK	9	97	578.843	2	24.08	1155.66	5.9		93 98 92 95 98 99 100 100 100	HLQYELLLK	CID
RHPEYAVSVLLR	12	97	720.418	2	21.17	1438.8	11.1		98 99 98 99 98 98 90 90 98 99 100 100	RHPEYAVSVLLR	CID
LGKVGTR	7	97	365.73	2	6.95	729.45	-6.2		98 94 97 99 96 98 99	LGKVGTR	CID
KDLWEHFK	8	97	551.779	2	14.06	1101.56	-14.8		96 99 99 91 97 98 98 99	KDLWEHFK	CID
RLSELAAWSR	10	97	594.831	2	17.44	1187.64	5.6		94 96 98 99 99 99 98 94 95 99	RLSELAAWSR	CID
LYKELPDPQESLQR	14	97	572.641	3	18.72	1714.89	7.3		97 95 97 98 98 97 99 99 99 99 97 96 92 99	LYKELPDPQESLQR	CID
VVVGPSVVAVPLPLHR	16	97	547.01	3	29.57	1638	5.8		96 96 99 97 93 95 98 99 99 99 97 99 95 97 96 100	VVVGPSVVAVPLPLHR	CID
SAGWNLPMGK	10	97	530.768	2	20.86	1059.52	3.7		94 95 97 97 97 99 98 95 98 100	SAGWNLPMGK	CID
LAERLR	6	97	379.235	2	8.94	756.461	-8.2		96 94 97 97 99 100	LAERLR	CID
VLSAADKGNVKAAWGK	16	97	538.972	3	14.76	1613.89	3.5		99 99 100 99 98 99 99 92 93 95 96 98 97 95 95 99	VLSAADKGNVKAAWGK	CID
VLDQYLFELSR	11	97	691.876	2	28.24	1381.72	9.5		95 98 99 98 99 99 98 98 94 92 97	VLDQYLFELSR	CID
QFKFFKQFFKK	11	97	508.316	3	19.67	1521.85	50.9		95 99 99 99 97 89 96 98 97 98 100	QFKFFKQFFKK	CID
FAHTVLTSR	9	97	516.288	2	11.88	1030.56	4.8		96 97 98 99 99 99 98 96 99	FAHTVLTSR	CID
EVVDPTKC(+57.02)NLLAEK	14	97	808.434	2	19.02	1614.83	15.3	Carbamidomethylation	96 95 99 100 98 98 98 96 97 98 99 99 99 97	EVVDPTKC(+57.02)NLLAEK	CID
YGKHTLNQLDSVK	13	97	751.912	2	12.66	1501.79	13.6		93 86 99 100 100 100 98 97 99 99 99 99 99	YGKHTLNQLDSVK	CID
TSHMDC(+57.02)LK	8	97	496.22	2	4.63	990.426	-0.5	Carbamidomethylation	95 97 98 96 99 98 98 99	TSHMDC(+57.02)LK	CID
SC(+57.02)EYK	5	97	343.642	2	3.38	685.274	-6.1	Carbamidomethylation	95 95 99 99 99	SC(+57.02)EYK	CID
TSLTKELR	8	97	474.279	2	13.03	946.545	-0.5		95 97 99 99 97 98 95 99	TSLTKELR	CID
FFKKFFKQFFKK	12	97	418.255	4	19.19	1668.95	20.8		97 98 98 99 99 97 94 97 96 95 97 99	FFKKFFKQFFKK	CID
LPENVVVKDR	10	97	584.843	2	13.74	1167.66	8.3		99 97 99 95 99 99 99 90 95 99	LPENVVVKDR	CID
ESSLLNQHLC(+57.02)AVMGK	15	97	843.935	2	21.71	1685.82	19	Carbamidomethylation	93 90 98 99 100 98 98 98 99 99 98 99 94 97 99	ESSLLNQHLC(+57.02)AVMGK	CID
SGVTC(+57.02)QK	7	97	390.187	2	3.3	778.364	-5.8	Carbamidomethylation	97 95 99 99 98 95 97	SGVTC(+57.02)QK	CID
WQVMKTEGSTTTHVK	15	97	578.304	3	10.9	1731.86	16.9		93 99 99 94 97 99 100 97 99 97 96 97 95 96 98	WQVMKTEGSTTTHVK	CID
FLEKKYASSANLHLPK	16	97	462.261	4	17.69	1845.01	0.7		98 98 98 96 96 98 96 96 95 97 93 97 96 99 99 100	FLEKKYASSANLHLPK	CID
LAVTTR	6	97	330.702	2	8.6	659.397	-11.6		97 96 98 95 97 99	LAVTTR	CID
LSMLDKLYLHPR	12	96	743.418	2	22.78	1484.82	2.3		94 95 93 99 99 95 98 99 99 97 97 99	LSMLDKLYLHPR	CID
LTPETLTR	8	96	465.767	2	14.46	929.518	0.4		97 96 97 99 98 97 93 98	LTPETLTR	CID
ADEKKFWGK	9	96	554.793	2	11.1	1107.57	0.5		95 98 99 96 97 97 96 94 99	ADEKKFWGK	CID
LNDYVEK	7	96	440.723	2	10	879.434	-3.1		97 95 99 98 98 97 95	LNDYVEK	CID
LKASFLPPLEK	11	96	621.877	2	22.94	1241.74	0.5		96 95 98 95 95 99 98 96 96 98 98	LKASFLPPLEK	CID
WHEEVELYR	9	96	630.803	2	17.22	1259.59	-0.8		89 95 99 99 97 99 98 97 99	WHEEVELYR	CID
KFLSHLK	7	96	436.771	2	9.4	871.528	-1.1		95 98 97 95 94 99 99	KFLSHLK	CID
QTALVELLKHKPK	13	96	752.967	2	19.56	1503.91	3.4		86 93 99 99 99 99 99 99 96 93 97 99 100	QTALVELLKHKPK	CID
SANLHLPK	8	96	440.256	2	14.55	878.497	-0.8		93 95 95 97 97 99 99 100	SANLHLPK	CID
LQPDPNTLC(+57.02)DEFKADEK	17	96	673.996	3	19.35	2018.93	19.6	Carbamidomethylation	97 95 96 99 97 94 97 100 99 99 100 96 93 90 95 99 99	LQPDPNTLC(+57.02)DEFKADEK	CID
LLEPQGLR	8	96	463.277	2	16.15	924.539	-0.2		99 99 100 95 93 92 97 99	LLEPQGLR	CID
FFESFGDLSSADALLGNPKVK	21	96	748.054	3	30.48	2241.13	3.6		97 99 100 100 99 97 99 99 99 99 99 99 99 99 98 91 93 83 89 94 99	FFESFGDLSSADALLGNPKVK	CID
LKHLVDEPQNLLK	13	96	516.303	3	18.64	1545.89	-0.3		95 93 95 98 98 99 100 98 96 91 96 99 100	LKHLVDEPQNLLK	CID
KEC(+57.02)C(+57.02)DQPLLEK	11	96	473.903	3	12.47	1418.65	23.1	Carbamidomethylation	96 99 99 97 90 94 94 98 98 99 99	KEC(+57.02)C(+57.02)DQPLLEK	CID
ELFLNR	6	96	396.223	2	16.7	790.434	-3.3		94 94 98 99 96 99	ELFLNR	CID
LFTFHADLC(+57.02)TLPDTEK	16	96	636.647	3	26.22	1906.91	2.6	Carbamidomethylation	98 97 99 96 94 98 99 98 98 99 99 92 95 92 97 97	LFTFHADLC(+57.02)TLPDTEK	CID
LPENVVVKDQR	11	96	432.913	3	14.06	1295.72	-3.2		99 98 99 95 98 99 99 94 94 90 99	LPENVVVKDQR	CID
LLKHKPK	7	96	432.295	2	19.49	862.575	0.7		98 98 98 95 98 98 92	LLKHKPK	CID
VVTGVANALAHR	12	96	604.351	2	16.37	1206.68	3.6		96 97 99 96 98 98 96 96 95 95 95 100	VVTGVANALAHR	CID
QDLGEEHFK	9	96	368.189	3	13.86	1101.51	33.8		91 97 98 92 98 99 97 97 99	QDLGEEHFK	CID
DPTEKQLKK	9	96	543.813	2	24.26	1085.61	2.6		98 94 98 98 93 94 98 97 100	DPTEKQLKK	CID
LRSELAAWSR	10	96	594.829	2	17.11	1187.64	2.3		91 95 98 99 99 99 98 93 95 99	LRSELAAWSR	CID
RLLPR	5	96	327.723	2	12.66	653.434	-4.9		91 94 99 99 100	RLLPR	CID
ADLSGLTKEQPLKVSK	16	96	571.996	3	18.54	1712.97	-0.5		95 98 100 99 98 99 97 95 96 95 90 96 95 96 96 99	ADLSGLTKEQPLKVSK	CID
KLNDYVEKGSHGK	13	96	492.26	3	8.47	1473.76	0		96 97 92 97 99 99 99 98 92 94 94 98 100	KLNDYVEKGSHGK	CID
TSDANLNWNNLKGK	14	96	787.902	2	16.93	1573.78	2.4		92 93 99 99 98 99 97 96 96 94 98 96 95 100	TSDANLNWNNLKGK	CID
ALDMEDFKTEVSLAPQK	17	96	641.325	3	24.93	1920.95	2		94 97 100 98 100 100 99 99 99 99 99 99 98 96 83 83 99	ALDMEDFKTEVSLAPQK	CID
YLYELAR	7	96	464.251	2	64.31	926.486	1.1		95 97 97 98 96 95 98	YLYELAR	CID
LTSSAR	6	96	317.677	2	6.6	633.345	-9.1		97 97 96 96 96 98	LTSSAR	CID
EFLDVLK	7	96	432.247	2	22.92	862.48	-1.7		95 94 97 97 96 98 98	EFLDVLK	CID
YNSESPSKQYSLVK	14	96	815.414	2	14.09	1628.8	5		95 95 99 100 99 94 92 92 96 96 97 98 98 99	YNSESPSKQYSLVK	CID
LVTDLTK	7	96	395.238	2	64.3	788.464	-4.8		97 96 98 97 97 95 95	LVTDLTK	CID
NC(+57.02)EVR	5	96	339.154	2	2.93	676.296	-4.6	Carbamidomethylation	89 96 99 98 100	NC(+57.02)EVR	CID
VTMNMC(+57.02)R	7	96	456.198	2	11.57	910.382	-0.7	Carbamidomethylation	96 98 95 95 93 99 100	VTMNMC(+57.02)R	CID
SAFSVGLER	9	96	483.256	2	18.58	964.498	-0.7		92 94 99 99 99 95 95 96 98	SAFSVGLER	CID
VVSALR	6	96	322.707	2	10.08	643.402	-2.2		97 97 98 93 95 98	VVSALR	CID
C(+57.02)ASLQK	6	96	353.68	2	4.72	705.348	-3.5	Carbamidomethylation	98 98 95 95 93 98	C(+57.02)ASLQK	CID
LLDNWDTLASTLSK	14	96	788.92	2	29.52	1575.81	6.7		87 85 99 98 98 99 99 99 99 97 96 97 97 99	LLDNWDTLASTLSK	CID
QC(+57.02)LLPK	6	96	379.713	2	14.9	757.416	-4.8	Carbamidomethylation	89 95 95 99 100 100	QC(+57.02)LLPK	CID
FEKTQEELTPFFK	13	96	548.616	3	23.87	1642.82	1.8		93 97 95 88 88 99 99 99 99 97 98 99 99	FEKTQEELTPFFK	CID
VSLLAALDEASK	12	96	608.843	2	26.77	1215.67	0.9		90 94 99 99 99 97 97 97 97 93 95 97	VSLLAALDEASK	CID
ENVLR	5	96	315.68	2	8.04	629.35	-5.7		94 91 98 99 99	ENVLR	CID
SVQVMK	6	96	346.192	2	9.34	690.374	-6.1		92 94 96 98 97 99	SVQVMK	CID
ADLSGLTK	8	96	402.725	2	12.46	803.439	-3.4		95 98 98 96 89 96 98 99	ADLSGLTK	CID
KFWGK	5	96	333.191	2	10.48	664.37	-3.8		95 98 96 94 98	KFWGK	CID
HLVDEPQNLLKQNC(+57.02)DQFEK	19	96	785.721	3	20.21	2354.13	3.1	Carbamidomethylation	100 100 100 100 100 77 74 96 99 100 99 98 97 98 99 97 96 99 99	HLVDEPQNLLKQNC(+57.02)DQFEK	CID
C(+57.02)VLHEQTPVSEKVTK	15	96	439.492	4	14.91	1753.9	20.8	Carbamidomethylation	96 98 99 97 98 95 98 95 97 96 96 92 92 95 99	C(+57.02)VLHEQTPVSEKVTK	CID
WDDYQEC(+57.02)YLAMVPSHAVVAR	20	96	804.049	3	25.54	2409.09	15.7	Carbamidomethylation	89 99 99 99 98 100 99 99 100 100 98 99 96 96 92 92 92 89 90 98	WDDYQEC(+57.02)YLAMVPSHAVVAR	CID
VASLERTYGDMADC(+57.02)C(+57.02)AK	17	96	649.62	3	16.31	1945.83	3	Carbamidomethylation	99 98 98 93 88 85 92 98 98 100 98 98 99 97 96 97 100	VASLERTYGDMADC(+57.02)C(+57.02)AK	CID
LSSPATLNSR	10	96	523.285	2	13.24	1044.56	-1.3		97 97 99 98 98 97 97 87 92 98	LSSPATLNSR	CID
VELLKHQPK	9	96	364.568	3	19.48	1090.65	29.8		95 99 99 100 97 95 84 97 100	VELLKHQPK	CID
KTYDSYLGDDYVR	13	96	797.876	2	17.67	1593.73	4.7		78 82 99 100 100 100 100 98 99 99 98 97 100	KTYDSYLGDDYVR	CID
DKATC(+57.02)VEK	8	96	475.733	2	4.23	949.454	-2.1	Carbamidomethylation	94 94 97 95 95 95 98 98	DKATC(+57.02)VEK	CID
LAVTTSGSR	9	96	446.247	2	9.74	890.482	-2.8		98 98 99 99 99 97 87 89 97	LAVTTSGSR	CID
VSESLSLKLPPNVVEESAR	19	96	685.377	3	25.39	2053.11	1.4		95 95 99 97 98 97 98 99 100 99 92 93 98 99 98 98 88 86 97	VSESLSLKLPPNVVEESAR	CID
HTLDQLDSVKVWPR	14	96	565.307	3	21.88	1692.89	2.2		97 98 98 98 95 98 99 96 97 94 94 90 90 100	HTLDQLDSVKVWPR	CID
EHVKLVNELTEFAK	14	96	828.955	2	23.15	1655.89	3.7		98 95 99 98 99 98 89 94 97 91 96 92 96 99	EHVKLVNELTEFAK	CID
ASC(+57.02)KLSLKR	9	96	531.811	2	9.31	1061.6	4.8	Carbamidomethylation	94 96 98 97 98 98 98 94 98	ASC(+57.02)KLSLKR	CID
NQEC(+57.02)C(+57.02)DKPLLEK	12	96	511.933	3	12.82	1532.7	52.7	Carbamidomethylation	90 96 99 98 97 98 96 96 97 97 99 99	NQEC(+57.02)C(+57.02)DKPLLEK	CID
FGERALKAWSVAR	13	96	745.921	2	19.49	1489.82	8.5		95 90 99 99 99 100 99 99 96 93 94 96 100	FGERALKAWSVAR	CID
SGELQTQAK	9	96	481.252	2	6.81	960.488	1		92 85 100 100 99 99 98 99 100	SGELQTQAK	CID
QQTALVELLKHQPK	14	96	545.013	3	17.69	1631.94	49.5		93 97 98 99 99 99 100 100 100 98 94 78 99 100	QQTALVELLKHQPK	CID
ALKLR	5	96	300.709	2	9.52	599.412	-15.1		93 96 95 99 100	ALKLR	CID
FQKFFKKFFKK	11	96	508.316	3	19.72	1521.89	27.3		90 92 96 98 98 97 98 98 97 98 100	FQKFFKKFFKK	CID
LWYGFQDALLVR	12	96	740.902	2	26.05	1479.79	1.5		89 90 98 98 99 98 99 95 97 98 98 99	LWYGFQDALLVR	CID
FFKKFFKKFKFK	12	96	557.341	3	20.06	1668.99	5.4		94 95 97 98 98 97 97 98 96 92 94 99	FFKKFFKKFKFK	CID
VKDVSEVVTPR	11	96	614.851	2	13.96	1227.68	4.1		92 96 99 99 98 98 93 94 96 95 98	VKDVSEVVTPR	CID
C(+57.02)VLHEKTPVSEKVTK	15	96	439.492	4	15.14	1753.94	-1.2	Carbamidomethylation	96 98 99 98 98 95 99 97 98 96 94 86 93 96 99	C(+57.02)VLHEKTPVSEKVTK	CID
VVTVSLPR	8	96	435.774	2	17.63	869.533	1.2		95 94 96 98 96 98 93 99	VVTVSLPR	CID
GKVGTR	6	96	309.187	2	6.94	616.366	-9.4		88 94 99 98 99 99	GKVGTR	CID
FYDLR	5	96	357.17	2	8.44	712.354	-41		89 95 97 99 99	FYDLR	CID
LFETR	5	96	333.181	2	11.16	664.354	-11		95 95 97 96 96	LFETR	CID
AYFEKTQEELTPFFKK	16	96	669.354	3	23.99	2005.02	10.5		94 95 96 98 97 93 90 99 99 99 99 91 93 95 97 99	AYFEKTQEELTPFFKK	CID
LNDYVEKGSHGKLVELVK	18	96	676.717	3	17.47	2027.11	11.6		98 96 99 99 99 99 97 93 96 97 91 93 96 94 97 99 99 100	LNDYVEKGSHGKLVELVK	CID
KLQKQTALVELLK	13	96	756.49	2	20.27	1510.94	13.8		92 98 97 98 94 94 93 98 98 99 99 100 100	KLQKQTALVELLK	CID
TSDANLNWNNLK	12	96	695.35	2	19.01	1388.67	11.5		94 95 99 99 99 99 98 96 94 94 97 97	TSDANLNWNNLK	CID
TAEEQLKTVMENFVAFVGK	19	96	714.38	3	34.9	2140.09	14.7		88 90 99 97 92 96 98 99 99 99 100 99 99 97 96 97 97 95 98	TAEEQLKTVMENFVAFVGK	CID
DDPQSSWDR	9	96	553.231	2	9.73	1104.45	0.2		96 97 99 98 99 95 90 95 99	DDPQSSWDR	CID
DVSMEAC(+57.02)C(+57.02)ADGHR	13	96	754.298	2	9.93	1506.56	11.4	Carbamidomethylation	94 95 99 97 100 99 98 97 95 95 88 95 100	DVSMEAC(+57.02)C(+57.02)ADGHR	CID
SELAAWSR	8	96	460.235	2	15.08	918.456	-0.1		92 97 99 99 99 96 91 97	SELAAWSR	CID
HTLNLQDSVK	10	96	577.817	2	11.95	1153.61	8		94 97 99 95 93 92 98 98 98 99	HTLNLQDSVK	CID
LGGEDVR	7	96	373.193	2	8.06	744.377	-6.5		97 93 88 98 99 98 99	LGGEDVR	CID
NTKSPLFVGK	10	96	545.819	2	14.49	1089.62	5.7		88 94 98 99 92 95 97 99 99 100	NTKSPLFVGK	CID
FQDLGEEHFK	10	96	417.211	3	13.57	1248.58	27.4		90 92 99 99 90 98 99 97 98 99	FQDLGEEHFK	CID
GEEHFK	6	96	373.675	2	13.33	745.34	-5.9		86 97 99 97 98 99	GEEHFK	CID
ALLYLNTGYQR	11	96	656.364	2	21.24	1310.7	11.5		91 96 100 100 100 96 96 92 91 95 99	ALLYLNTGYQR	CID
C(+57.02)YDGYTLR	8	96	524.235	2	13.64	1046.45	5.1	Carbamidomethylation	92 95 99 93 96 96 97 99	C(+57.02)YDGYTLR	CID
HRSPVEDVC(+57.02)TAKPR	14	96	413.714	4	10.04	1650.83	-0.4	Carbamidomethylation	85 93 94 94 97 99 99 98 99 98 98 95 95 99	HRSPVEDVC(+57.02)TAKPR	CID
NTHTELLK	8	95	478.263	2	9.84	954.513	-1.6		88 93 97 96 97 97 99 100	NTHTELLK	CID
ELLKHKPK	8	95	496.816	2	19.49	991.618	-0.3		93 94 99 98 96 98 97 92	ELLKHKPK	CID
WLGDVGLTEVFSDRADLSGLTK	22	95	793.754	3	31.09	2378.21	12		93 100 99 100 99 99 100 98 99 99 98 97 95 93 86 91 94 91 84 96 98 99	WLGDVGLTEVFSDRADLSGLTK	CID
ASEQLK	6	95	338.185	2	4.72	674.36	-5.6		95 96 97 89 98 99	ASEQLK	CID
SAKEGSQGSHVYTK	14	95	493.579	3	5.73	1477.72	-0.8		94 95 98 99 91 95 88 88 98 97 99 99 99 100	SAKEGSQGSHVYTK	CID
FLEKK	5	95	332.702	2	6.61	663.395	-7.7		92 95 98 96 97	FLEKK	CID
LKLSYEWLTK	10	95	640.86	2	18.45	1279.72	-9.4		95 95 99 99 95 95 90 95 95 98	LKLSYEWLTK	CID
RPGVLC(+57.02)PGR	9	95	506.28	2	11.74	1010.54	0.4	Carbamidomethylation	97 92 87 96 99 98 97 96 100	RPGVLC(+57.02)PGR	CID
VLTSDAR	7	95	381.209	2	7.84	760.408	-4.4		97 98 98 96 93 90 97	VLTSDAR	CID
HTLNQLDSVKVEGPR	15	95	564.978	3	20.51	1691.9	9.6		98 99 99 96 96 99 100 99 99 99 98 89 71 94 100	HTLNQLDSVKVEGPR	CID
KDGYVLSLNR	10	95	582.82	2	17.15	1163.63	-3.5		96 99 95 98 99 99 96 90 86 99	KDGYVLSLNR	CID
ATVLYEWR	8	95	519.267	2	12.88	1036.53	-14.4		92 94 99 100 99 99 83 99	ATVLYEWR	CID
TSDANLNWDNLK	12	95	695.836	2	17.76	1389.65	3.2		90 92 99 99 96 97 93 93 98 95 98 99	TSDANLNWDNLK	CID
LVDELTEFAK	10	95	582.811	2	21.24	1163.61	0.2		96 96 98 97 95 95 98 91 94 97	LVDELTEFAK	CID
YNSESPSK	8	95	456.208	2	4.45	910.403	-2.7		96 95 98 97 96 95 95 94	YNSESPSK	CID
C(+57.02)VLHEKTPVSEK	12	95	476.25	3	14.62	1425.73	0.4	Carbamidomethylation	95 97 99 99 99 98 99 95 91 86 93 97	C(+57.02)VLHEKTPVSEK	CID
AFTNSK	6	95	334.173	2	4.53	666.334	-4		95 95 96 92 97 100	AFTNSK	CID
LVNELTEFAKTC(+57.02)VADESHAGC(+57.02)EK	23	95	652.807	4	23.38	2607.19	1.5	Carbamidomethylation	94 95 97 100 99 99 99 98 98 98 98 97 97 98 98 98 97 95 94 81 79 93 95	LVNELTEFAKTC(+57.02)VADESHAGC(+57.02)EK	CID
VSKKFPK	7	95	417.247	2	8.52	832.517	-46.1		94 96 92 91 98 99 100	VSKKFPK	CID
SVKVWPR	7	95	436.261	2	19.63	870.508	0.3		90 91 97 97 96 98 100	SVKVWPR	CID
LFHESVYGQC(+57.02)K	11	95	456.553	3	13.43	1366.63	1.1	Carbamidomethylation	96 93 87 99 97 98 99 97 94 94 98	LFHESVYGQC(+57.02)K	CID
LPENVVVK	8	95	449.273	2	15.81	896.533	-1		99 96 97 86 94 97 96 98	LPENVVVK	CID
RQLGHAVQETDDTSHQEAAC(+57.02)HK	22	95	630.292	4	11.16	2517.14	-1.5	Carbamidomethylation	91 82 86 97 99 100 100 99 100 100 99 97 94 95 93 94 98 96 96 96 92 98	RQLGHAVQETDDTSHQEAAC(+57.02)HK	CID
ATSLVKWLSK	10	95	566.84	2	20.4	1131.67	0.5		92 95 95 99 97 93 90 97 98 99	ATSLVKWLSK	CID
LSSFSQK	7	95	398.713	2	8.8	795.413	-1.7		97 97 96 95 93 92 98	LSSFSQK	CID
ATC(+57.02)VEK	6	95	354.171	2	3.47	706.332	-5	Carbamidomethylation	95 96 95 95 97 95	ATC(+57.02)VEK	CID
DLVDPTKC(+57.02)NLLAEKQYGFC(+57.02)K	20	95	600.551	4	21.89	2398.17	3.4	Carbamidomethylation	87 89 98 99 98 98 98 96 94 99 99 99 98 93 91 94 89 94 97 99	DLVDPTKC(+57.02)NLLAEKQYGFC(+57.02)K	CID
ATVQVVGGLK	10	95	486.297	2	16.85	970.581	-0.8		94 95 99 98 98 98 90 86 97 99	ATVQVVGGLK	CID
LFTFHADLC(+57.02)TLPDTEKQLK	19	95	570.047	4	25.68	2276.15	3.5	Carbamidomethylation	99 98 99 96 94 96 95 95 98 98 99 96 96 89 93 88 90 93 98	LFTFHADLC(+57.02)TLPDTEKQLK	CID
EVVDPTK	7	95	394.212	2	8.56	786.412	-3.4		93 89 95 98 96 97 99	EVVDPTK	CID
MDNPDTFYSLK	11	95	665.803	2	20.34	1329.59	0.1		84 97 97 94 97 96 96 98 94 97 98	MDNPDTFYSLK	CID
LLYDRNTK	8	95	511.786	2	9.5	1021.56	1.3		99 99 98 94 92 90 91 98	LLYDRNTK	CID
LAQAAFFYLEPR	12	95	713.384	2	29.72	1424.75	5.3		79 73 97 99 100 100 99 99 99 100 100 100	LAQAAFFYLEPR	CID
LKPDNPTLC(+57.02)DEFKADEKKFWGKYLYELAR	29	95	715.769	5	30.13	3573.8	2.9	Carbamidomethylation	96 95 97 98 91 87 98 100 98 98 99 95 94 93 96 98 94 94 95 93 83 92 96 98 96 98 95 95 99	LKPDNPTLC(+57.02)DEFKADEKKFWGKYLYELAR	CID
KYGFC(+57.02)KGSVLQK	12	95	472.243	3	14.87	1413.74	-26.8	Carbamidomethylation	92 90 90 99 98 97 92 95 96 98 97 99	KYGFC(+57.02)KGSVLQK	CID
C(+57.02)LAWSSEQAK	10	95	590.278	2	14.48	1178.54	1.7	Carbamidomethylation	95 97 98 96 97 94 96 87 94 98	C(+57.02)LAWSSEQAK	CID
SAADKGNVK	9	95	445.241	2	8.61	888.466	1.1		91 94 99 99 95 90 96 95 98	SAADKGNVK	CID
GAC(+57.02)LLPK	7	95	379.713	2	14.85	757.416	-4.9	Carbamidomethylation	83 93 94 98 99 99 100	GAC(+57.02)LLPK	CID
VLTDSAR	7	95	381.21	2	7.99	760.408	-2.5		96 98 98 98 90 90 96	VLTDSAR	CID
VLESSAR	7	95	381.21	2	7.89	760.408	-4.3		95 97 99 95 92 91 96	VLESSAR	CID
LADEDMNSFKAAVK	14	95	513.589	3	18.04	1537.74	-0.1		98 97 99 99 98 90 93 92 92 92 94 94 95 99	LADEDMNSFKAAVK	CID
LC(+57.02)SQYAAYGKEK	12	95	473.23	3	11.18	1416.67	-2.5	Carbamidomethylation	97 97 98 96 98 99 99 96 82 89 95 95	LC(+57.02)SQYAAYGKEK	CID
LNDYVEKGSHGK	12	95	673.841	2	7.86	1345.66	4.2		96 95 99 99 97 97 93 86 92 91 96 100	LNDYVEKGSHGK	CID
YLC(+57.02)DNQDTLSSK	12	95	722.327	2	11.76	1442.63	3.3	Carbamidomethylation	93 96 99 96 90 90 98 98 95 94 94 98	YLC(+57.02)DNQDTLSSK	CID
ELSSFLQK	8	95	476.261	2	17.31	950.507	0.1		94 94 99 98 95 96 89 96	ELSSFLQK	CID
LSHTLFGDELC(+57.02)K	12	95	710.353	2	22.54	1418.69	3.1	Carbamidomethylation	88 86 95 99 99 98 88 96 98 98 97 98	LSHTLFGDELC(+57.02)K	CID
SSALKVPMMNSK	12	95	646.84	2	18.56	1291.66	1.6		92 94 96 99 99 99 92 82 92 97 99 100	SSALKVPMMNSK	CID
SQKFPK	6	95	367.713	2	10.2	733.412	-0.9		87 90 96 98 99 100	SQKFPK	CID
KSDLLFRDDTK	11	95	446.573	3	14.32	1336.7	-1.4		93 95 98 98 98 94 88 86 95 98 100	KSDLLFRDDTK	CID
ATVQVVAGLK	10	95	493.305	2	18.25	984.597	-1.2		93 95 99 98 95 96 95 84 96 99	ATVQVVAGLK	CID
GLPEFYDYDVALVR	14	95	828.931	2	30.05	1655.82	17.2		79 95 97 99 98 98 99 97 99 95 93 96 96 99	GLPEFYDYDVALVR	CID
VATVSLPR	8	95	421.758	2	16.88	841.502	0		98 99 99 96 96 96 84 98	VATVSLPR	CID
LAVPLLLRVAK	11	95	596.916	2	28.53	1191.81	8.8		95 95 99 99 100 100 97 94 84 93 96	LAVPLLLRVAK	CID
LSLKR	5	95	308.708	2	8.28	615.407	-8.5		97 96 97 93 95	LSLKR	CID
ETMREK	6	95	397.196	2	6.32	792.38	-4.1		99 98 88 93 98 97	ETMREK	CID
RVLC(+57.02)PGR	7	95	429.241	2	12.01	856.47	-2.5	Carbamidomethylation	90 90 97 96 98 98 100	RVLC(+57.02)PGR	CID
FFKKFKFQFFKK	12	95	557.34	3	20.01	1668.95	25.5		95 95 98 98 97 92 93 94 93 94 97 99	FFKKFKFQFFKK	CID
LQKFWR	6	95	439.248	2	13.61	876.497	-18.8		97 94 93 95 95 99	LQKFWR	CID
WKVWPR	6	95	436.261	2	20.21	870.486	25.2		86 97 96 96 98 100	WKVWPR	CID
KFKFFQKFFKK	11	95	508.318	3	19.77	1521.89	30.2		96 97 97 98 96 86 89 95 97 98 100	KFKFFQKFFKK	CID
AVPLPLHR	8	95	451.782	2	24.38	901.55	-0.2		90 93 95 98 96 98 94 99	AVPLPLHR	CID
LSQKFPK	7	95	424.254	2	11.12	846.496	-3.2		96 95 92 90 98 98 99	LSQKFPK	CID
LRYFK	5	95	363.716	2	11.27	725.422	-7.1		96 95 94 95 97	LRYFK	CID
KLDSVKVWPR	10	95	614.351	2	18.78	1226.71	-21.9		90 96 98 97 95 93 96 94 96 100	KLDSVKVWPR	CID
KVPQVSTPTLVEVSRSLGK	19	95	675.735	3	24.41	2024.16	10.3		97 99 97 97 90 90 96 97 98 100 100 100 95 88 92 89 94 90 99	KVPQVSTPTLVEVSRSLGK	CID
QYGFC(+57.02)KGSVLQK	12	95	707.868	2	15.27	1413.71	10.1	Carbamidomethylation	91 96 98 99 99 99 95 86 82 99 98 100	QYGFC(+57.02)KGSVLQK	CID
LSTNAYPDLR	10	95	575.299	2	17.04	1148.58	0.1		96 96 96 93 95 98 93 92 94 97	LSTNAYPDLR	CID
LKAWSVAR	8	95	465.781	2	15.4	929.545	3		97 97 99 97 87 87 97 99	LKAWSVAR	CID
SVQLMEKR	8	95	495.774	2	11.47	989.533	1		91 92 97 99 93 97 91 98	SVQLMEKR	CID
SGNQFVLYR	9	95	542.284	2	18.55	1082.55	2.6		92 86 95 97 99 99 99 98 100	SGNQFVLYR	CID
LAAC(+57.02)ESLAR	9	95	495.756	2	12.39	989.496	1.5	Carbamidomethylation	97 97 99 99 99 90 93 90 97	LAAC(+57.02)ESLAR	CID
LVTDLKTVHK	10	95	577.355	2	13.99	1152.69	7.6		95 95 98 99 96 90 91 97 98 99	LVTDLKTVHK	CID
KNLAGR	6	95	329.701	2	3.57	657.392	-8.2		92 96 96 96 95 99	KNLAGR	CID
LYELARR	7	95	460.769	2	15.32	919.524	0		97 97 99 95 88 94 98	LYELARR	CID
LKPDPNTLC(+57.02)DEFKWEKKFWGKYLYELAR	28	95	715.776	5	29.74	3573.81	8.5	Carbamidomethylation	97 96 99 100 97 97 98 99 96 97 99 94 94 91 98 96 94 91 90 82 92 95 97 95 97 93 94 99	LKPDPNTLC(+57.02)DEFKWEKKFWGKYLYELAR	CID
GHGAKVAAALTK	12	95	562.335	2	8.29	1122.65	4		91 94 95 97 98 98 88 89 97 99 99 100	GHGAKVAAALTK	CID
LQEC(+57.02)C(+57.02)DKPLLEK	12	95	511.601	3	12.3	1531.74	28	Carbamidomethylation	95 95 98 92 92 94 96 96 96 92 97 99	LQEC(+57.02)C(+57.02)DKPLLEK	CID
MLSAEEQAALTSLFAK	16	95	570.648	3	26.83	1708.87	30.4		90 99 99 97 98 98 95 97 99 99 95 88 91 85 94 99	MLSAEEQAALTSLFAK	CID
LREQSPDVLLAQLR	14	95	819.484	2	24	1636.93	17.1		91 94 97 95 96 90 95 97 98 97 95 92 95 99	LREQSPDVLLAQLR	CID
ALFYLNK	7	95	434.75	2	19.19	867.485	-0.6		92 95 98 93 95 95 99	ALFYLNK	CID
KLKKQTALVELLK	13	95	756.489	2	20.51	1510.98	-12		90 96 93 97 93 92 90 93 97 98 98 100 100	KLKKQTALVELLK	CID
TSWKNC(+57.02)EVR	9	95	590.287	2	8.97	1178.55	6.9	Carbamidomethylation	92 94 95 94 93 95 98 96 100	TSWKNC(+57.02)EVR	CID
QLKKQTALVELLK	13	95	756.49	2	20.41	1510.94	13.4		83 90 96 97 94 93 92 95 98 99 99 100 100	QLKKQTALVELLK	CID
QLLSER	6	95	373.211	2	9.21	744.413	-8.3		86 96 99 94 97 98	QLLSER	CID
KLLYK	5	95	332.702	2	11.78	663.432	-65.6		88 95 97 97 98	KLLYK	CID
ATSLVK	6	94	309.692	2	7.65	617.375	-10.1		93 94 92 95 97 98	ATSLVK	CID
KDTDFKLNELR	11	94	460.248	3	16.8	1377.73	-1		93 95 90 92 95 97 98 94 95 96 99	KDTDFKLNELR	CID
KTSHMDC(+57.02)LK	9	94	560.266	2	6.47	1118.52	-3.8	Carbamidomethylation	94 96 96 94 84 96 97 97 99	KTSHMDC(+57.02)LK	CID
QLNLK	5	94	308.192	2	10.38	614.375	-8.7		92 95 89 98 99	QLNLK	CID
TSDANLNWNNLKDKK	15	94	587.636	3	15.03	1759.89	1.1		98 98 99 99 98 99 95 92 90 86 89 88 94 97 99	TSDANLNWNNLKDKK	CID
AEFVEVTKLVTDLTKVHK	18	94	515.045	4	30.17	2056.16	-3		93 98 99 98 99 95 92 93 98 97 96 95 94 89 89 92 92 99	AEFVEVTKLVTDLTKVHK	CID
LC(+57.02)SKYAAYGKEK	12	94	473.231	3	11.14	1416.71	-25.9	Carbamidomethylation	97 96 92 94 99 99 99 97 82 89 95 96	LC(+57.02)SKYAAYGKEK	CID
RYTGGPR	7	94	403.716	2	4.33	805.419	-3.4		95 95 95 87 94 97 99	RYTGGPR	CID
VLLGAHNEKVR	11	94	412.578	3	10.88	1234.71	-2.5		97 99 99 94 97 96 94 96 85 86 98	VLLGAHNEKVR	CID
TGDGQTYR	8	94	449.207	2	4.44	896.399	-0.3		97 95 99 87 88 95 96 99	TGDGQTYR	CID
KGEGEKPFEMK	11	94	427.22	3	15.55	1278.63	8.7		94 89 96 85 99 97 95 95 97 95 99	KGEGEKPFEMK	CID
QLLYK	5	94	332.703	2	12.31	663.396	-6.4		83 94 98 99 99	QLLYK	CID
VVVLPFPSKEQR	12	94	466.942	3	22.37	1397.8	0.5		95 96 99 99 97 98 95 95 85 91 87 99	VVVLPFPSKEQR	CID
QYSLVK	6	94	369.213	2	12.56	736.412	-1.8		89 94 95 95 96 98	QYSLVK	CID
QFAPNDLVSATK	12	94	645.845	2	15.74	1289.66	11.3		92 90 92 86 93 95 96 97 97 97 99 100	QFAPNDLVSATK	CID
DPWDKKR	7	94	472.752	2	18.24	943.487	1.5		95 87 95 98 94 94 98	DPWDKKR	CID
WSDLYVQK	8	94	519.777	2	14.47	1037.52	19.6		84 97 98 98 96 95 89 98	WSDLYVQK	CID
LC(+57.02)SQYAAYGK	10	94	580.774	2	12.03	1159.53	0.9	Carbamidomethylation	97 98 99 97 97 98 97 96 82 82	LC(+57.02)SQYAAYGK	CID
RSLQKALGWDVR	12	94	714.898	2	18.2	1427.8	-13.5		90 86 98 96 96 97 98 89 88 96 98 99	RSLQKALGWDVR	CID
ALKAWDVAR	9	94	515.296	2	16.11	1028.58	1.4		93 95 95 96 95 94 92 90 99	ALKAWDVAR	CID
NALFC(+57.02)LDSAWK	11	94	662.824	2	27.73	1323.63	3.5	Carbamidomethylation	94 96 99 99 94 93 95 93 92 88 96	NALFC(+57.02)LDSAWK	CID
LPENVVVKDQHR	12	94	478.6	3	12.77	1432.78	-0.9		99 97 98 93 95 99 97 94 95 83 82 99	LPENVVVKDQHR	CID
EEHFK	5	94	345.166	2	13.81	688.318	-2.3		96 96 86 96 97	EEHFK	CID
WLNEQR	6	94	423.216	2	11.12	844.419	-1.5		92 98 95 95 90 97	WLNEQR	CID
VSLLAALDEASQK	13	94	448.928	3	25.01	1343.73	24.4		92 96 99 99 98 98 98 98 98 92 91 69 99	VSLLAALDEASQK	CID
FLSHLK	6	94	372.721	2	10.73	743.433	-6.4		93 96 93 89 96 99	FLSHLK	CID
DKATC(+57.02)VEKLLNKQQDDFGK	19	94	560.037	4	18	2236.12	2.2	Carbamidomethylation	96 95 99 99 98 97 98 96 97 95 89 90 84 82 92 96 95 93 99	DKATC(+57.02)VEKLLNKQQDDFGK	CID
QESPDVLLAQLR	12	94	684.88	2	24.83	1367.74	3.3		82 93 97 96 98 97 98 98 93 88 94 97	QESPDVLLAQLR	CID
VTLSTKELR	9	94	523.815	2	13.53	1045.61	3		92 94 94 90 92 92 96 98 100	VTLSTKELR	CID
KLNLK	5	94	308.192	2	10.33	614.412	-66.9		92 98 86 98 98	KLNLK	CID
EDEDYLSLLLNR	12	94	740.364	2	34.48	1478.73	-7.9		78 78 96 99 99 99 99 99 99 96 92 98	EDEDYLSLLLNR	CID
LKPDPNTLC(+57.02)DEFKADEKKFWGKYLYELAR	29	94	715.769	5	30.07	3573.8	2.9	Carbamidomethylation	96 95 96 98 85 87 97 99 97 97 99 95 93 92 96 97 89 92 93 91 84 93 96 97 95 97 92 93 99	LKPDPNTLC(+57.02)DEFKADEKKFWGKYLYELAR	CID
SYKENR	6	94	398.698	2	2.09	795.388	-7.2		90 93 91 96 96 99	SYKENR	CID
HLDELSLPR	9	94	540.297	2	18.39	1078.58	2.8		96 99 97 97 93 89 94 85 97	HLDELSLPR	CID
WLRNYYC(+57.02)FR	9	94	459.889	3	20.13	1376.64	1.4	Carbamidomethylation	94 98 94 86 93 94 95 94 99	WLRNYYC(+57.02)FR	CID
FGVADESHAC(+57.02)EK	12	94	675.277	2	7.97	1348.57	-23.6	Carbamidomethylation	86 79 97 99 99 99 97 95 97 92 93 96	FGVADESHAC(+57.02)EK	CID
FSALQYLR	8	94	499.276	2	23.82	996.539	-0.8		94 97 99 99 94 81 90 100	FSALQYLR	CID
TVMENFVAFVDK	12	94	700.354	2	29.18	1398.69	5.1		87 91 95 99 94 95 96 94 92 95 95 97	TVMENFVAFVDK	CID
KVPQVDTPTLVEVSR	15	94	834.475	2	21.95	1666.93	5.6		93 98 96 96 99 98 97 92 94 95 95 94 82 86 96	KVPQVDTPTLVEVSR	CID
KKTALVELLKHKPK	14	94	545.01	3	17.61	1632.04	-22.8		94 96 93 93 95 96 98 98 98 91 82 95 95 90	KKTALVELLKHKPK	CID
LETTWEKVLTSSAR	14	94	540.964	3	13.74	1619.85	10.8		98 98 94 85 86 98 96 99 99 97 95 89 87 97	LETTWEKVLTSSAR	CID
SFAQAR	6	94	340.179	2	6.95	678.345	-1.8		93 95 98 89 91 99	SFAQAR	CID
FLSAEEQAAVTSLFAK	16	94	571.304	3	23.72	1710.88	4.8		92 95 96 89 93 95 90 93 98 95 92 90 93 95 98 99	FLSAEEQAAVTSLFAK	CID
LQKFGER	7	94	439.249	2	13.42	876.482	1.9		97 93 94 95 84 96 99	LQKFGER	CID
FSYGGC(+57.02)K	7	94	409.678	2	9.89	817.343	-1.3	Carbamidomethylation	92 95 96 91 90 96 98	FSYGGC(+57.02)K	CID
TVHTLFGDELC(+57.02)K	12	94	710.353	2	22.24	1418.69	3.1	Carbamidomethylation	67 73 98 100 100 99 97 99 99 99 99 100	TVHTLFGDELC(+57.02)K	CID
C(+57.02)ASSSEKDVLR	11	94	417.879	3	14.91	1250.59	19.1	Carbamidomethylation	98 99 99 90 93 95 88 87 90 96 99	C(+57.02)ASSSEKDVLR	CID
FFETATESLAK	11	94	622.3	2	14.49	1242.61	-22.8		89 92 99 98 95 94 97 90 90 91 98	FFETATESLAK	CID
SKFDPNLTQR	10	94	603.318	2	13.57	1204.62	0.8		92 94 99 100 90 88 96 93 90 98	SKFDPNLTQR	CID
QFVTLTVTK	9	94	518.812	2	15.11	1035.6	13.3		85 90 93 94 98 97 98 99 100	QFVTLTVTK	CID
LSGKVGTR	8	94	409.248	2	6.96	816.482	-1.7		89 89 93 96 99 96 97 99	LSGKVGTR	CID
QEPLKVSK	8	94	464.777	2	9.19	927.539	1.4		89 97 95 97 95 97 92 96	QEPLKVSK	CID
ELPDPQESLQR	11	94	656.332	2	16.7	1310.65	2.5		93 93 95 99 97 95 98 95 93 86 98	ELPDPQESLQR	CID
VAPLGEEFREQR	12	94	477.585	3	17.63	1429.73	1		97 98 99 99 91 97 97 89 87 92 90 99	VAPLGEEFREQR	CID
GSYLQLVELSR	11	94	632.853	2	25.88	1263.68	6.9		76 87 91 99 99 99 99 99 97 95 98	GSYLQLVELSR	CID
TKEELTPFFK	10	94	620.32	2	24.5	1238.65	-23		82 86 99 99 98 98 95 94 97 98	TKEELTPFFK	CID
KFFKFFKKFFKK	12	94	557.34	3	20.42	1668.99	4.6		92 93 91 96 94 90 94 97 96 96 97 99	KFFKFFKKFFKK	CID
FFKKFFKKFFKKFFQK	16	94	740.789	3	23.35	2219.28	29		91 93 98 98 97 96 97 99 99 99 98 97 93 90 70 97	FFKKFFKKFFKKFFQK	CID
APQLTSPELMALTR	14	94	764.423	2	26.85	1526.81	12.9		99 98 99 100 99 99 95 98 96 74 92 90 89 96	APQLTSPELMALTR	CID
SGVLQKALGGEDVR	14	94	476.933	3	18.37	1427.77	3.3		85 78 98 99 98 98 99 99 97 81 96 97 98 99	SGVLQKALGGEDVR	CID
KQFLLNLVK	9	94	551.836	2	27.32	1101.69	-29.7		87 90 98 99 99 95 92 92 98	KQFLLNLVK	CID
HTLGGQLDSVKVWPR	15	94	564.981	3	20.93	1691.91	6.8		98 99 99 86 80 97 99 99 99 98 95 94 82 90 100	HTLGGQLDSVKVWPR	CID
LLDNDADTLASTLSK	15	94	788.926	2	29.99	1575.8	24.5		84 82 99 95 95 93 97 95 97 97 93 94 97 98 98	LLDNDADTLASTLSK	CID
VLTRSSAQR	9	94	509.294	2	2.67	1016.57	1.6		98 96 94 92 89 92 95 95 99	VLTRSSAQR	CID
LVELLKHKPK	10	94	402.264	3	17.67	1203.77	0		99 98 99 99 97 85 94 95 93 83	LVELLKHKPK	CID
KTEELTPFFKK	11	94	684.367	2	21.07	1366.75	-22.3		89 86 99 98 97 95 92 94 93 95 99	KTEELTPFFKK	CID
QKFGER	6	94	382.705	2	13.6	763.398	-2.8		86 96 95 90 99 100	QKFGER	CID
ATQEELKTVMENFVAFVGK	19	94	714.378	3	35.53	2140.09	11.7		82 84 84 90 90 97 97 97 99 97 99 98 99 97 96 96 96 93 97	ATQEELKTVMENFVAFVGK	CID
WRNSLQPR	8	94	528.79	2	11.92	1055.56	3.3		89 95 92 93 95 93 96 100	WRNSLQPR	CID
SVQLMEK	7	94	417.724	2	13.06	833.432	1		92 93 96 97 88 98 95	SVQLMEK	CID
RC(+57.02)APR	5	94	330.171	2	2.29	658.333	-9.2	Carbamidomethylation	89 89 96 97 99	RC(+57.02)APR	CID
DSLQPR	6	94	358.204	2	7.48	714.366	39		92 90 92 93 98 99	DSLQPR	CID
LATVLSPR	8	94	428.766	2	17.17	855.518	0		98 97 98 96 90 87 89 99	LATVLSPR	CID
LDSVKVADPR	10	94	550.319	2	20.86	1098.6	19.2		94 97 98 95 94 98 92 79 94 99	LDSVKVADPR	CID
LVELLKHQPK	10	94	402.264	3	17.72	1203.73	30.2		98 98 99 98 97 85 94 76 96 99	LVELLKHQPK	CID
QNLKHKPK	8	94	496.818	2	17.75	991.593	28.9		86 95 99 95 93 98 97 90	QNLKHKPK	CID
DVLLYEKR	8	94	518.295	2	14.66	1034.58	-0.1		91 88 97 97 95 96 89 98	DVLLYEKR	CID
FLGDGFLTNQLSSR	14	94	518.93	3	19.63	1553.78	-10.4		98 99 95 97 82 90 92 82 95 94 97 97 97 99	FLGDGFLTNQLSSR	CID
C(+57.02)LVEK	5	94	324.67	2	5.82	647.331	-10.5	Carbamidomethylation	91 97 95 98 93	C(+57.02)LVEK	CID
RGAEEQLVPR	10	94	577.821	2	12.05	1153.62	6		93 85 90 98 97 93 98 97 98 100	RGAEEQLVPR	CID
VDGALC(+57.02)TEK	9	94	496.74	2	8.37	991.464	0.3	Carbamidomethylation	96 98 95 97 95 93 94 95 91	VDGALC(+57.02)TEK	CID
AYFQETKEELTPFFKK	16	94	669.355	3	23.43	2005.02	12.4		93 94 98 90 93 91 96 98 99 99 98 90 91 93 95 99	AYFQETKEELTPFFKK	CID
EQVLTSSAR	9	94	495.785	2	4.41	989.514	41.2		92 93 97 99 99 98 92 87 95	EQVLTSSAR	CID
QAPQLTSPELMAGALTR	17	94	595.346	3	22.09	1782.93	49.2		92 99 92 92 98 99 99 96 98 99 97 98 78 97 94 89 95	QAPQLTSPELMAGALTR	CID
LKPDPNTLC(+57.02)DEFKADEK	17	94	674.002	3	19.26	2018.96	11.5	Carbamidomethylation	95 94 95 97 92 93 97 99 97 98 98 92 91 88 92 97 95	LKPDPNTLC(+57.02)DEFKADEK	CID
LC(+57.02)VLHEK	7	94	449.744	2	11.34	897.474	-1.5	Carbamidomethylation	93 93 97 96 93 98 93	LC(+57.02)VLHEK	CID
ANLHLPK	7	94	396.737	2	14.22	791.465	-7.4		86 88 97 94 99 99 99	ANLHLPK	CID
SYKENRELFLNR	12	94	523.613	3	14.54	1567.81	4.4		95 95 98 99 89 90 98 95 94 94 90 99	SYKENRELFLNR	CID
VVYPR	5	94	317.185	2	8.75	632.365	-15.3		93 95 95 94 96	VVYPR	CID
SPQAAFFYLEPR	12	94	713.391	2	29.58	1424.71	41.9		78 73 95 99 100 99 99 99 96 97 99 100	SPQAAFFYLEPR	CID
SLHTLFGDELC(+57.02)K	12	94	710.36	2	22.4	1418.69	14	Carbamidomethylation	79 89 96 99 99 98 85 95 97 97 98 99	SLHTLFGDELC(+57.02)K	CID
WKVDAPR	7	94	436.262	2	19.93	870.471	44.6		84 96 97 97 91 96 99	WKVDAPR	CID
QEC(+57.02)C(+57.02)DKPLLEK	11	94	473.905	3	12.09	1418.65	27.9	Carbamidomethylation	94 97 97 96 85 79 94 98 98 99 99	QEC(+57.02)C(+57.02)DKPLLEK	CID
YGKHTLNQLDSVKVWPR	17	94	511.033	4	19.81	2040.09	5.5		89 79 93 91 98 99 95 95 99 99 98 97 97 92 87 95 100	YGKHTLNQLDSVKVWPR	CID
LEDRVTYYC(+57.02)NR	11	94	496.904	3	12.94	1487.68	5.8	Carbamidomethylation	97 98 95 96 91 93 98 98 88 85 97	LEDRVTYYC(+57.02)NR	CID
QNC(+57.02)DQFEK	8	94	534.726	2	4.65	1067.43	2.1	Carbamidomethylation	84 93 97 98 93 92 97 98	QNC(+57.02)DQFEK	CID
MATEHR	6	94	372.674	2	2.85	743.338	-7.5		85 96 95 97 95 97	MATEHR	CID
NLKKENFEVLC(+57.02)K	12	94	507.943	3	15.68	1520.8	3.2	Carbamidomethylation	88 95 97 92 95 86 90 99 97 98 95 97	NLKKENFEVLC(+57.02)K	CID
YELAR	5	94	326.173	2	8.5	650.339	-12.7		95 98 95 92 90	YELAR	CID
QLDSVKVWPR	10	94	614.351	2	18.32	1226.68	7.7		85 95 99 97 92 93 94 89 96 100	QLDSVKVWPR	CID
SVSDLYVQK	9	94	519.779	2	14.04	1037.54	3.4		90 92 95 97 98 98 95 88 95	SVSDLYVQK	CID
AAAQEQYSAAVAR	13	94	668.342	2	11.61	1334.66	9		92 94 98 95 99 97 97 94 93 89 88 90 94	AAAQEQYSAAVAR	CID
EYQTLEDK	8	93	513.249	2	9.35	1024.47	12.1		94 90 90 95 96 97 94 93	EYQTLEDK	CID
SSGALHFVAR	10	93	522.788	2	18.84	1043.55	10.5		97 97 92 98 99 98 98 82 80 97	SSGALHFVAR	CID
TSDANLNWNNLKDK	14	93	544.94	3	17.01	1631.79	4.3		97 98 99 97 96 97 93 92 90 84 91 91 94 92	TSDANLNWNNLKDK	CID
LQKNVK	6	93	365.233	2	2.73	728.455	-4.6		95 92 90 91 96 98	LQKNVK	CID
SFAC(+57.02)YSTVFDKLK	13	93	522.596	3	19.3	1564.76	5	Carbamidomethylation	82 84 93 93 95 98 98 98 98 97 89 95 98	SFAC(+57.02)YSTVFDKLK	CID
DKATC(+57.02)VEKLLNK	12	93	473.593	3	15.42	1417.76	-1.7	Carbamidomethylation	96 95 95 96 98 98 98 78 88 95 90 97	DKATC(+57.02)VEKLLNK	CID
QVPKVSEPTLVEVSR	15	93	834.475	2	22.74	1666.93	5.5		85 93 98 97 98 99 99 91 92 98 90 95 87 87 96	QVPKVSEPTLVEVSR	CID
WFLGSFLYEYDK	12	93	784.378	2	33.23	1566.74	1.3		80 95 99 97 98 96 98 97 98 93 84 88	WFLGSFLYEYDK	CID
TSDANLNWDNLKDKK	15	93	587.963	3	14.03	1760.87	-2		94 96 99 94 92 98 94 91 96 88 88 88 94 94 97	TSDANLNWDNLKDKK	CID
KFLAGHAVFLTK	12	93	444.606	3	19.79	1330.78	14.8		95 97 95 90 80 83 89 94 98 99 100 100	KFLAGHAVFLTK	CID
DRKDGYVLSLNR	12	93	718.387	2	16.77	1434.76	0.7		93 95 98 99 85 90 95 96 89 93 90 99	DRKDGYVLSLNR	CID
LFTFHADLC(+57.02)TLPDTEKQLKK	20	93	602.071	4	24.27	2404.25	3.3	Carbamidomethylation	99 99 99 98 95 98 98 99 97 96 99 96 96 88 93 84 80 63 90 99	LFTFHADLC(+57.02)TLPDTEKQLKK	CID
KMEQTKDALLK	11	93	652.867	2	11.55	1303.72	2.1		94 73 96 88 95 95 98 97 96 98 99	KMEQTKDALLK	CID
DLPVNPMC(+57.02)LYR	11	93	689.339	2	25.58	1376.66	4.2	Carbamidomethylation	89 91 97 99 98 93 86 92 91 91 99	DLPVNPMC(+57.02)LYR	CID
LVELLQHKPK	10	93	402.262	3	17.39	1203.73	25.7		98 98 99 99 90 81 94 95 94 85	LVELLQHKPK	CID
SDLYVSDAFHK	11	93	641.311	2	17.96	1280.6	3		86 93 98 99 99 95 95 92 88 85 96	SDLYVSDAFHK	CID
WSATSPHVPK	10	93	555.292	2	13.99	1108.57	3.1		91 98 95 94 91 85 86 96 98 99	WSATSPHVPK	CID
FSALTPDEDTFPK	13	93	734.376	2	21.79	1466.69	30.8		86 92 98 99 99 93 95 94 83 81 95 97 99	FSALTPDEDTFPK	CID
EQPLKVSK	8	93	464.776	2	9.1	927.539	-1		92 89 94 97 95 96 89 95	EQPLKVSK	CID
KLLSER	6	93	373.212	2	10.1	744.449	-52.3		89 92 93 91 97 98	KLLSER	CID
YELRAR	6	93	404.226	2	15.6	806.44	-1.8		95 94 90 90 92 98	YELRAR	CID
FQC(+57.02)DNQDTLSSK	12	93	721.835	2	11.55	1441.61	28.9	Carbamidomethylation	77 83 97 98 94 90 97 96 97 96 96 98	FQC(+57.02)DNQDTLSSK	CID
LFQLK	5	93	324.706	2	16.79	647.401	-5.4		94 91 88 96 97	LFQLK	CID
TVLSELSDPVELR	13	93	729.398	2	30.03	1456.78	2.9		67 74 98 99 99 99 99 99 93 92 96 97 99	TVLSELSDPVELR	CID
LKPDPNTLC(+57.02)DEFKADEKK	18	93	537.771	4	18.59	2147.06	-0.7	Carbamidomethylation	94 92 88 95 88 91 99 99 98 98 98 91 90 82 88 95 95 98	LKPDPNTLC(+57.02)DEFKADEKK	CID
MDNPDTFYSLKYQLK	15	93	621.639	3	23.28	1861.89	1.7		80 97 97 94 97 95 96 95 94 95 88 89 87 95 98	MDNPDTFYSLKYQLK	CID
KQTALVQNLKHKKPATEEQLK	21	93	811.482	3	18.56	2431.39	13.2		97 97 98 99 99 98 94 90 75 70 96 98 95 86 90 90 95 96 95 98 100	KQTALVQNLKHKKPATEEQLK	CID
ETSYLC(+57.02)SQQDLLSR	14	93	850.415	2	22	1698.79	16.4	Carbamidomethylation	60 65 95 99 100 100 99 97 95 99 99 98 98 99	ETSYLC(+57.02)SQQDLLSR	CID
KVPQVSTPTLVEVDR	15	93	834.474	2	22.35	1666.93	5.3		93 94 97 93 96 98 98 95 92 95 89 93 81 88 95	KVPQVSTPTLVEVDR	CID
FTC(+57.02)PLTGLWPLNTLK	15	93	880.977	2	34.89	1759.93	3.8	Carbamidomethylation	69 74 99 99 100 99 97 98 97 95 97 89 90 95 98	FTC(+57.02)PLTGLWPLNTLK	CID
STDALRQEKTDTVR	14	93	540.618	3	9.45	1618.83	2.7		96 96 99 90 92 93 93 98 97 90 90 83 88 98	STDALRQEKTDTVR	CID
KC(+57.02)LLPKLETMR	11	93	694.875	2	22.58	1387.77	-24	Carbamidomethylation	93 93 99 100 96 93 93 95 83 79 99	KC(+57.02)LLPKLETMR	CID
FLGDGVDNFQLSSR	14	93	518.926	3	19.34	1553.75	6.5		99 99 98 99 83 91 93 78 82 91 97 97 96 99	FLGDGVDNFQLSSR	CID
VALQNKFK	8	93	474.287	2	12.17	946.56	0		95 96 97 91 87 89 91 99	VALQNKFK	CID
NSSFVYLEPLPR	12	93	711.377	2	26.28	1420.74	3.3		68 76 98 99 99 99 99 99 90 94 93 99	NSSFVYLEPLPR	CID
HTKLAVLPLLR	11	93	630.917	2	23.93	1259.81	8.9		98 99 99 99 99 99 84 61 96 98 99	HTKLAVLPLLR	CID
LTSLQK	6	93	345.166	2	10.31	688.412	-138.5		88 85 95 97 98 99	LTSLQK	CID
TSDANLNWNNLKKGK	15	93	568.303	3	15.31	1701.88	5.1		97 98 99 99 97 98 94 90 89 85 90 92 91 86 99	TSDANLNWNNLKKGK	CID
ASEQLQALGEK	11	93	587.33	2	12.52	1172.6	35.1		94 97 99 96 98 82 97 99 78 92 98	ASEQLQALGEK	CID
WVAVPLPLHR	10	93	594.372	2	24.35	1186.7	26.3		85 98 99 100 98 99 79 82 95 100	WVAVPLPLHR	CID
VLTDASR	7	93	381.209	2	8.08	760.408	-4.9		94 97 98 98 88 87 94	VLTDASR	CID
GVHPEYAVSVLLR	13	93	720.418	2	21.81	1438.79	20		82 94 97 96 98 98 96 81 82 95 97 99 100	GVHPEYAVSVLLR	CID
VHKEC(+57.02)C(+57.02)HGDLLEC(+57.02)ADDRADLAK	22	93	871.405	3	15.82	2611.16	13.3	Carbamidomethylation	99 99 100 100 99 99 98 72 88 99 100 100 97 90 94 95 91 81 63 93 99 100	VHKEC(+57.02)C(+57.02)HGDLLEC(+57.02)ADDRADLAK	CID
VGVLTSSAQR	10	93	509.295	2	2.72	1016.56	14.4		95 86 91 95 94 97 95 90 91 98	VGVLTSSAQR	CID
SDGC(+57.02)FR	6	93	371.149	2	5.56	740.291	-10.2	Carbamidomethylation	95 98 86 92 94 94	SDGC(+57.02)FR	CID
VVAVPLPLHR	10	93	550.853	2	23.45	1099.69	3.8		93 94 97 97 94 98 90 90 82 97	VVAVPLPLHR	CID
TLLYGDTSR	9	93	513.269	2	14.1	1024.52	4.6		88 93 99 96 82 94 95 94 98	TLLYGDTSR	CID
LMSAEEKAAVTSLFAK	16	93	848.466	2	25.36	1694.89	15.3		69 39 98 99 100 100 99 99 99 99 97 97 98 98 99 100	LMSAEEKAAVTSLFAK	CID
ALQAWSVAR	9	93	501.299	2	16	1000.55	37.7		91 95 94 97 95 90 90 86 98	ALQAWSVAR	CID
VQVDEVGGEALGR	13	93	664.868	2	15.62	1327.67	36.4		91 94 99 99 99 99 88 80 95 88 94 85 98	VQVDEVGGEALGR	CID
QQASLAKK	8	93	437.243	2	18.47	872.508	-41.7		77 83 95 98 98 98 95 100	QQASLAKK	CID
AALSAADKGNVK	12	93	572.823	2	16.51	1143.62	6.3		83 84 99 99 99 97 98 94 80 92 93 95	AALSAADKGNVK	CID
GVPGVLC(+57.02)PGR	10	93	506.28	2	12.02	1010.53	12.2	Carbamidomethylation	82 92 85 85 95 99 99 96 96 100	GVPGVLC(+57.02)PGR	CID
DDTKC(+57.02)LASLAK	11	93	611.316	2	14.13	1220.61	9	Carbamidomethylation	94 96 93 92 89 91 94 94 95 97 98	DDTKC(+57.02)LASLAK	CID
KAVYLK	6	93	361.231	2	6.01	720.453	-7.7		86 93 90 96 99 98	KAVYLK	CID
DTHGASELAHR	11	93	398.537	3	4.07	1192.56	26		95 95 95 78 92 90 94 98 97 98 100	DTHGASELAHR	CID
NYQEAK	6	93	376.681	2	3.38	751.35	-3.7		86 93 95 98 96 95	NYQEAK	CID
DLLFRDDTK	9	93	561.797	2	17.14	1121.57	6.7		91 94 99 91 86 92 95 96 99	DLLFRDDTK	CID
SLAPTAATKR	10	93	508.3	2	8.37	1014.58	2.6		89 94 99 97 97 97 95 89 86 94	SLAPTAATKR	CID
FADEKLFTFHADLC(+57.02)TLPDTEKQLK	24	93	956.502	3	27.46	2866.42	21.7	Carbamidomethylation	92 93 99 99 99 100 99 99 97 75 78 83 98 99 98 99 93 96 90 94 87 86 96 99	FADEKLFTFHADLC(+57.02)TLPDTEKQLK	CID
RLAHYDLR	8	93	522.291	2	10.21	1042.57	-0.4		93 95 93 85 91 95 97 99	RLAHYDLR	CID
KLPDPNTLC(+57.02)DEFKADEK	17	93	674	3	19.31	2018.96	8.1	Carbamidomethylation	88 96 91 97 94 90 93 98 96 97 98 93 91 86 93 96 94	KLPDPNTLC(+57.02)DEFKADEK	CID
YDLNAK	6	93	362.183	2	8.55	722.36	-10.2		92 96 93 88 94 97	YDLNAK	CID
FFKRHKFKKFFKFKEK	16	93	444.871	5	23.17	2219.29	14.6		97 97 97 95 74 88 97 96 97 96 95 95 97 95 83 96	FFKRHKFKKFFKFKEK	CID
LALYLNTGYQR	11	93	656.364	2	21.14	1310.7	11.2		92 90 99 100 100 96 95 87 86 86 99	LALYLNTGYQR	CID
QFWGKYLYELAR	12	93	787.432	2	22.85	1572.81	25.6		94 99 98 98 99 99 99 98 98 74 67 98	QFWGKYLYELAR	CID
SGEQVAFK	8	93	433.221	2	10.83	864.434	-8.1		95 91 99 85 84 97 98 99	SGEQVAFK	CID
LSLTKDNSK	9	93	503.282	2	7.08	1004.55	0.1		96 96 98 95 92 95 89 86 93	LSLTKDNSK	CID
C(+57.02)HTAVDR	7	93	429.697	2	4.08	857.381	-1.7	Carbamidomethylation	90 89 97 92 91 96 99	C(+57.02)HTAVDR	CID
LLHAGFKGR	9	93	499.798	2	10.5	997.582	-0.2		99 99 99 99 90 94 90 74 98	LLHAGFKGR	CID
VSFFC(+57.02)K	6	93	394.193	2	16.9	786.373	-2.7	Carbamidomethylation	92 93 91 94 95 96	VSFFC(+57.02)K	CID
FYLNKEKR	8	93	549.31	2	14.29	1096.6	2.4		90 94 97 90 88 97 93 97	FYLNKEKR	CID
LAFYLNKEKR	10	93	641.374	2	14.33	1280.72	6.8		90 89 98 99 97 89 86 92 94 99	LAFYLNKEKR	CID
WC(+57.02)TLSTHEAGGK	12	93	673.818	2	11.91	1345.61	10.3	Carbamidomethylation	93 99 99 99 98 98 98 100 98 77 73 87	WC(+57.02)TLSTHEAGGK	CID
FQVENSNR	8	93	497.242	2	8.47	992.467	2.6		94 93 99 99 90 91 85 95	FQVENSNR	CID
WLGDVGLTEVFSDRVSLSGLTK	22	93	793.765	3	30.85	2378.25	11.1		92 99 98 100 99 98 99 97 98 95 93 91 93 89 80 80 92 90 79 94 96 99	WLGDVGLTEVFSDRVSLSGLTK	CID
FLGDRDFNQLSSR	13	93	518.928	3	19.2	1553.76	3.4		97 98 93 95 90 89 89 90 93 95 93 92 97	FLGDRDFNQLSSR	CID
LFTFHADLC(+57.02)TLPDTEQKLKK	20	93	602.074	4	24.13	2404.25	9.3	Carbamidomethylation	99 99 99 97 95 97 98 99 98 98 99 95 96 89 93 69 90 63 90 99	LFTFHADLC(+57.02)TLPDTEQKLKK	CID
TC(+57.02)VADESHAGC(+57.02)EKSLHTLFGDELC(+57.02)K	25	93	955.447	3	21.26	2863.26	21	Carbamidomethylation	95 96 99 99 94 93 99 99 99 57 66 81 89 88 98 98 99 99 98 89 97 99 99 99 99	TC(+57.02)VADESHAGC(+57.02)EKSLHTLFGDELC(+57.02)K	CID
LEALKEGNSLAEYHAK	16	93	591.648	3	15.78	1771.91	7.2		86 94 98 99 95 97 75 87 92 96 97 99 94 89 94 97	LEALKEGNSLAEYHAK	CID
MKNLSPR	7	93	423.236	2	5.19	844.459	-1.5		78 92 95 96 95 95 99	MKNLSPR	CID
DPSGFSPEVQK	11	93	595.79	2	13.89	1189.56	4.2		96 91 98 91 95 98 90 96 87 86 96	DPSGFSPEVQK	CID
MTNLR	5	93	317.666	2	8.2	633.327	-13.6		87 95 90 95 97	MTNLR	CID
ATVLYEGERVALQNK	15	93	845.973	2	17.72	1689.9	15.8		91 92 97 99 99 98 78 92 92 95 94 97 86 88 97	ATVLYEGERVALQNK	CID
C(+57.02)VLHKETPVSEKVTK	15	93	439.491	4	14.72	1753.94	-3.2	Carbamidomethylation	95 97 98 90 79 86 96 95 97 97 94 88 90 94 98	C(+57.02)VLHKETPVSEKVTK	CID
DTYDEGQDDPR	11	93	655.767	2	7.64	1309.51	10.2		90 90 98 99 99 80 87 95 96 91 98	DTYDEGQDDPR	CID
AFDEKLFTFHWLC(+57.02)TLPDTEKQLK	23	93	956.501	3	27.3	2866.44	15.8	Carbamidomethylation	61 65 99 99 99 100 99 96 94 93 91 96 99 99 99 92 95 89 94 93 90 98 99	AFDEKLFTFHWLC(+57.02)TLPDTEKQLK	CID
GPNHAGAVVSR	11	92	532.801	2	4.89	1063.55	33		90 91 97 98 99 77 93 92 92 94 98	GPNHAGAVVSR	CID
SLHTLFGDELC(+57.02)KVASLR	17	92	649.346	3	28.48	1945.01	4	Carbamidomethylation	51 68 98 100 100 100 99 100 100 100 99 98 97 95 86 91 97	SLHTLFGDELC(+57.02)KVASLR	CID
VAEVSLPR	8	92	435.773	2	17.3	869.497	40.3		91 87 92 95 93 95 89 99	VAEVSLPR	CID
KADSC(+57.02)QLDYSQGPC(+57.02)LGLFKR	20	92	781.715	3	23	2342.11	3.1	Carbamidomethylation	97 97 95 91 95 93 78 82 98 99 98 98 94 94 95 80 93 90 89 97	KADSC(+57.02)QLDYSQGPC(+57.02)LGLFKR	CID
ALLEVYNMMSR	11	92	663.832	2	26.57	1325.65	2.4		90 95 99 100 99 97 93 79 74 94 99	ALLEVYNMMSR	CID
KQC(+57.02)LLPKLETMR	12	92	506.288	3	20.04	1515.83	10.6	Carbamidomethylation	94 88 89 97 99 97 97 97 96 88 72 98	KQC(+57.02)LLPKLETMR	CID
C(+57.02)ADLQK	6	92	367.676	2	5.93	733.343	-7.2	Carbamidomethylation	92 93 95 91 88 97	C(+57.02)ADLQK	CID
TMREK	5	92	332.674	2	6.85	663.337	-4.9		98 90 94 94 86	TMREK	CID
KTALVELLKHKPKATEEQLK	20	92	576.836	4	20.25	2303.36	-17.8		91 90 97 96 94 97 96 97 95 90 94 91 89 89 85 91 91 82 95 99	KTALVELLKHKPKATEEQLK	CID
LC(+57.02)PQPEEHR	9	92	583.274	2	8.02	1164.53	-0.3	Carbamidomethylation	93 93 93 92 86 94 94 88 99	LC(+57.02)PQPEEHR	CID
VAPLGEEFR	9	92	509.251	2	18.63	1016.53	-40.7		90 93 96 96 77 93 95 92 99	VAPLGEEFR	CID
KGFPDATETDLQELVAKR	18	92	673.357	3	23.73	2017.05	1.5		69 60 99 98 98 97 97 99 98 99 99 95 97 97 92 88 85 97	KGFPDATETDLQELVAKR	CID
TGEERHDC(+57.02)FLAHK	13	92	533.916	3	9.85	1598.73	0.7	Carbamidomethylation	98 94 98 94 94 93 91 90 98 81 75 97 100	TGEERHDC(+57.02)FLAHK	CID
SPHKAALTLDEK	12	92	437.253	3	13.12	1308.7	25.9		77 78 82 94 98 98 99 99 94 94 99 98	SPHKAALTLDEK	CID
MQEAEDYLSLLLNR	14	92	847.93	2	33.75	1693.83	6.2		79 75 87 98 100 100 99 99 98 89 87 95 90 97	MQEAEDYLSLLLNR	CID
FLLPVPQLK	9	92	527.836	2	31.02	1053.66	-1.6		91 95 99 94 94 83 85 92 97	FLLPVPQLK	CID
GHAWAR	6	92	349.178	2	6.26	696.346	-7.4		89 94 98 88 89 95	GHAWAR	CID
GVPRLC(+57.02)PGR	9	92	506.279	2	11.8	1010.54	-0.5	Carbamidomethylation	77 91 86 97 97 97 94 92 100	GVPRLC(+57.02)PGR	CID
TLKVQGR	7	92	401.249	2	7.21	800.487	-4.1		92 96 93 92 90 85 99	TLKVQGR	CID
C(+57.02)LMEGAGDVAFVK	13	92	698.835	2	22.88	1395.65	2.3	Carbamidomethylation	94 97 94 99 87 92 86 97 97 96 81 81 98	C(+57.02)LMEGAGDVAFVK	CID
VVTGVANALAHYR	13	92	457.589	3	19.24	1369.75	-0.5		94 91 90 79 90 95 92 97 97 93 89 92 98	VVTGVANALAHYR	CID
QSKSPLFVGK	10	92	545.817	2	14.98	1089.62	1.9		78 83 89 95 94 97 97 97 95 99	QSKSPLFVGK	CID
RYFK	4	92	307.175	2	10.97	612.338	-6.3		95 92 90 92	RYFK	CID
KLAEC(+57.02)C(+57.02)K	7	92	454.7	2	6.32	907.426	-43.9	Carbamidomethylation	87 89 90 95 92 95 99	KLAEC(+57.02)C(+57.02)K	CID
MLSAEEKAAVSTLFAK	16	92	565.972	3	25.02	1694.89	2.1		97 100 99 98 99 99 99 100 99 98 50 48 95 96 99 100	MLSAEEKAAVSTLFAK	CID
GKFPDATETDLQELVAKR	18	92	673.357	3	23.78	2017.05	1.1		40 65 99 98 99 98 99 100 99 99 99 96 99 97 94 90 91 98	GKFPDATETDLQELVAKR	CID
HQSELAHR	8	92	489.267	2	3.39	976.484	35.6		83 89 92 96 95 93 91 98	HQSELAHR	CID
FAHTVLTDK	9	92	516.285	2	12.39	1030.54	10.5		93 96 96 99 98 98 89 74 86	FAHTVLTDK	CID
LEALKENGSLAEYHAK	16	92	443.985	4	16.06	1771.91	0.1		95 97 98 97 80 91 81 68 94 99 96 98 94 90 96 99	LEALKENGSLAEYHAK	CID
AC(+57.02)SLPYASESKEC(+57.02)R	14	92	553.249	3	13.14	1656.72	0.5	Carbamidomethylation	92 95 99 99 96 96 96 93 95 85 80 88 81 94	AC(+57.02)SLPYASESKEC(+57.02)R	CID
SYKERNELFLNR	12	92	523.611	3	14.88	1567.81	0.2		92 92 90 95 93 84 97 94 90 92 85 99	SYKERNELFLNR	CID
VVAVPLVFTR	10	92	550.85	2	23.22	1099.68	8.6		91 91 97 97 91 95 90 86 85 96	VVAVPLVFTR	CID
SLFTDVVAEKDLFHC(+57.02)VSVVYPR	22	92	646.084	4	34.43	2580.3	1.1	Carbamidomethylation	88 93 99 99 99 98 99 98 99 93 95 96 97 94 95 94 91 86 84 84 51 90	SLFTDVVAEKDLFHC(+57.02)VSVVYPR	CID
FAGALVR	7	92	367.238	2	12.97	732.428	45.9		90 95 72 93 96 98 99	FAGALVR	CID
SLFTDVVAEKDLFHC(+57.02)VSFTLPR	22	92	861.115	3	34.39	2580.3	6.8	Carbamidomethylation	55 69 99 99 100 100 100 99 99 94 95 99 98 95 98 97 86 82 82 90 88 99	SLFTDVVAEKDLFHC(+57.02)VSFTLPR	CID
LKQLK	5	92	315.217	2	5.91	628.427	-11.2		89 87 91 95 98	LKQLK	CID
QPLVSK	6	92	336.224	2	9.09	670.401	49.1		85 83 89 97 99 99	QPLVSK	CID
QKTALVELLKHKPK	14	92	545.013	3	17.78	1632.01	5.8		90 97 92 93 98 98 99 98 99 95 90 97 82 68	QKTALVELLKHKPK	CID
ALQAAFFYLEPR	12	92	713.389	2	30.18	1424.75	13		55 66 97 100 100 100 99 99 99 100 100 100	ALQAAFFYLEPR	CID
C(+57.02)C(+57.02)TKPESERMEQTEDYLSLLLNR	23	92	958.127	3	29.71	2871.32	14	Carbamidomethylation	100 100 100 100 99 100 96 97 98 87 65 38 95 99 99 99 99 94 96 97 92 86 98	C(+57.02)C(+57.02)TKPESERMEQTEDYLSLLLNR	CID
WFLGSFLQPDAMR	13	92	784.386	2	31.73	1566.77	-4.6		85 97 100 99 99 99 98 90 86 92 81 81 99	WFLGSFLQPDAMR	CID
RLC(+57.02)ASLQKFWRALKAWSVAR	20	92	816.464	3	22.86	2446.35	7.3	Carbamidomethylation	97 98 99 99 97 97 73 76 97 96 98 93 86 90 94 88 90 91 93 99	RLC(+57.02)ASLQKFWRALKAWSVAR	CID
ALKC(+57.02)ASLQKFWR	12	92	503.274	3	14.41	1506.81	-8.2	Carbamidomethylation	92 95 95 96 96 97 98 95 85 85 78 98	ALKC(+57.02)ASLQKFWR	CID
WSVAR	5	92	309.668	2	12.21	617.329	-12.5		81 93 94 97 98	WSVAR	CID
C(+57.02)VLHEQTPVSEK	12	92	476.252	3	14.9	1425.69	29.4	Carbamidomethylation	87 92 99 97 98 86 96 94 91 82 91 93	C(+57.02)VLHEQTPVSEK	CID
WVVGPSVVAVPLPLHR	16	92	576.021	3	29.93	1725.01	19		85 98 98 95 93 89 91 95 98 99 93 96 83 89 79 97	WVVGPSVVAVPLPLHR	CID
LETMREK	7	92	453.739	2	6.11	905.464	-1.2		95 98 98 75 92 97 91	LETMREK	CID
HSRPVEDVC(+57.02)TAKPR	14	92	413.713	4	10.81	1650.83	-2.8	Carbamidomethylation	72 74 81 85 93 99 99 98 99 98 97 97 97 99	HSRPVEDVC(+57.02)TAKPR	CID
SYLQLWAFDAVKGK	14	92	813.45	2	29.45	1624.86	14.9		57 62 98 98 100 99 99 99 98 94 93 96 95 99	SYLQLWAFDAVKGK	CID
LC(+57.02)RPGLR	7	92	436.248	2	10.14	870.486	-5.4	Carbamidomethylation	94 93 95 83 80 98 100	LC(+57.02)RPGLR	CID
ELYNRPYLYELAR	13	92	850.476	2	30.61	1698.87	37.9		93 92 94 80 88 75 93 97 98 98 95 93 98	ELYNRPYLYELAR	CID
FFQKFFKKFFKKFFKK	16	92	740.788	3	24.51	2219.28	27.9		89 89 91 97 77 70 95 97 97 97 96 97 94 92 93 98	FFQKFFKKFFKKFFKK	CID
WQVMGATEGSTTTHVK	16	92	578.305	3	11.63	1731.83	39.8		90 98 99 85 78 90 96 99 83 91 90 93 94 92 95 97	WQVMGATEGSTTTHVK	CID
EQSPDVLLAQLR	12	92	684.885	2	24.58	1367.74	10.8		84 81 97 94 97 95 98 97 92 87 94 97	EQSPDVLLAQLR	CID
ALKC(+57.02)ASLQK	9	92	509.792	2	7.53	1017.56	4.7	Carbamidomethylation	89 93 93 94 90 90 96 93 98	ALKC(+57.02)ASLQK	CID
AGWNLSAAK	9	92	459.245	2	15.96	916.477	-1.6		90 85 90 96 96 94 94 94 95	AGWNLSAAK	CID
EVVDPTKC(+57.02)NLLAEKQYGFC(+57.02)K	20	92	800.409	3	21.65	2398.17	16.2	Carbamidomethylation	96 95 99 99 88 90 94 66 70 99 100 99 99 91 90 95 91 96 97 100	EVVDPTKC(+57.02)NLLAEKQYGFC(+57.02)K	CID
WLGDVGLTEVFSDKVDLSGLTK	22	92	793.767	3	30.9	2378.24	17.5		91 99 98 100 99 97 99 93 95 88 92 91 93 83 79 89 92 89 79 94 97 99	WLGDVGLTEVFSDKVDLSGLTK	CID
VTYYC(+57.02)NR	7	92	488.221	2	8.13	974.428	-0.2	Carbamidomethylation	93 95 95 93 90 86 95	VTYYC(+57.02)NR	CID
FFKRHKKFKFFKKFEK	16	92	444.872	5	22.93	2219.29	14.8		98 98 92 93 70 89 95 93 96 96 93 95 95 95 88 95	FFKRHKKFKFFKKFEK	CID
MPC(+57.02)AEDYLSLLLNR	14	92	847.932	2	33.6	1693.82	19.5	Carbamidomethylation	80 88 92 99 100 100 99 99 96 81 85 94 86 95	MPC(+57.02)AEDYLSLLLNR	CID
NTPVFR	6	92	367.2	2	11.24	732.392	-8.7		83 89 92 96 97 99	NTPVFR	CID
LQQLEDKLNNELLAK	15	92	590.336	3	21.68	1767.97	8.2		90 90 95 97 95 96 92 93 87 84 91 92 95 95 94	LQQLEDKLNNELLAK	CID
LFREPSQADLALLK	14	92	534.311	3	23.87	1599.9	7.3		97 94 78 76 88 93 95 97 98 92 93 97 99 98	LFREPSQADLALLK	CID
RGPVLC(+57.02)PGR	9	92	506.279	2	11.26	1010.54	0.2	Carbamidomethylation	92 75 79 94 98 98 97 97 100	RGPVLC(+57.02)PGR	CID
QQLAPYSDDRLQR	13	92	530.609	3	15.18	1588.8	5.1		84 90 99 98 97 97 92 95 97 91 85 79 95	QQLAPYSDDRLQR	CID
TC(+57.02)VADESHAGC(+57.02)TR	13	92	732.308	2	4.26	1462.59	5.1	Carbamidomethylation	92 96 99 98 99 99 97 95 97 81 84 71 92	TC(+57.02)VADESHAGC(+57.02)TR	CID
LFQLKR	6	92	402.754	2	13.77	803.502	-10.4		95 95 94 93 87 90	LFQLKR	CID
WFLGSFLYELHR	12	92	784.39	2	30.9	1566.8	-21.4		86 98 100 99 99 99 100 99 98 76 55 99	WFLGSFLYELHR	CID
NELTEFAK	8	92	476.243	2	16.11	950.471	0.5		80 95 98 92 95 92 91 92	NELTEFAK	CID
AQFLLQGDAC(+57.02)VK	12	92	675.356	2	20.06	1348.68	11.7	Carbamidomethylation	86 87 98 99 99 94 87 96 90 85 88 95	AQFLLQGDAC(+57.02)VK	CID
ALWTGALTGPR	11	92	571.824	2	22.68	1141.62	9		88 93 96 98 95 97 98 96 71 84 98	ALWTGALTGPR	CID
DQATC(+57.02)VEKLLNK	12	92	473.595	3	15.13	1417.72	28.5	Carbamidomethylation	94 92 93 85 88 96 99 84 91 98 90 96	DQATC(+57.02)VEKLLNK	CID
WC(+57.02)TLSTHEANKC(+57.02)ASFR	16	92	492.728	4	15.17	1966.88	2.3	Carbamidomethylation	85 95 94 96 92 91 92 97 94 90 88 92 92 89 90 96	WC(+57.02)TLSTHEANKC(+57.02)ASFR	CID
WFLGSFLQPDDSR	13	92	784.389	2	31.35	1566.75	10.3		77 95 99 97 98 98 97 86 85 96 82 88 97	WFLGSFLQPDDSR	CID
LGEYGFQNELLVR	13	92	769.416	2	25.11	1536.79	15.9		66 41 99 99 99 100 98 97 99 98 99 99 100	LGEYGFQNELLVR	CID
ATVKVVAGLK	10	92	493.306	2	18.09	984.633	-36.7		89 95 97 92 94 94 96 72 92 97	ATVKVVAGLK	CID
RGLAVTTSGSR	11	92	552.812	2	8.38	1103.6	3.7		94 86 98 97 96 83 81 95 87 94 98	RGLAVTTSGSR	CID
TSTKPFHLK	9	92	529.802	2	10.69	1057.59	-2.1		92 93 93 89 81 88 94 99 99	TSTKPFHLK	CID
EAPKAAEERESR	12	91	458.231	3	5.78	1371.67	-2.9		96 94 95 94 91 87 94 96 88 88 84 95	EAPKAAEERESR	CID
GKVSAR	6	91	309.187	2	7.35	616.366	-10.4		79 90 97 92 93 99	GKVSAR	CID
KYASSANLHLPKLSLDTTYDLK	22	91	620.337	4	24.92	2477.32	0.9		98 98 98 98 90 49 63 97 97 99 97 96 95 90 94 93 88 93 93 96 97 98	KYASSANLHLPKLSLDTTYDLK	CID
TC(+57.02)VADEVFAGC(+57.02)EK	13	91	743.291	2	7.13	1484.63	-39.8	Carbamidomethylation	95 98 98 98 96 95 66 81 94 82 94 97 97	TC(+57.02)VADEVFAGC(+57.02)EK	CID
YLC(+57.02)DNQDTLSDK	12	91	736.325	2	12.95	1470.63	3.6	Carbamidomethylation	90 95 98 97 87 84 95 93 92 85 90 94	YLC(+57.02)DNQDTLSDK	CID
EESSPDSAEDVRK	13	91	724.802	2	9.97	1447.64	-36.4		91 93 94 97 95 98 93 93 97 93 79 81 86	EESSPDSAEDVRK	CID
EGKVVYPR	8	91	474.268	2	9.59	946.524	-3		91 72 82 97 97 97 97 99	EGKVVYPR	CID
KLEC(+57.02)C(+57.02)PK	7	91	467.708	2	12.47	933.441	-41.6	Carbamidomethylation	92 98 98 95 95 65 97	KLEC(+57.02)C(+57.02)PK	CID
EGSQGSHVYTK	11	91	596.783	2	5.89	1191.55	0.1		95 84 92 87 78 88 88 98 98 99 100	EGSQGSHVYTK	CID
C(+57.02)EAEVPDVSFLLLR	14	91	824.428	2	33.19	1646.83	4.1	Carbamidomethylation	89 96 97 99 99 95 96 93 90 82 62 83 99 99	C(+57.02)EAEVPDVSFLLLR	CID
QYYFDGLSR	9	91	574.773	2	19.4	1147.53	2.2		90 92 97 96 97 86 93 80 92	QYYFDGLSR	CID
LAHLTMPQLTLK	12	91	683.402	2	27.57	1364.78	3.1		70 65 95 100 99 96 93 92 95 95 98 99	LAHLTMPQLTLK	CID
RHPEYAVWLLR	11	91	720.41	2	21.9	1438.78	15.7		97 96 92 97 95 92 72 80 90 95 99	RHPEYAVWLLR	CID
LLGNVLVVVLRAR	13	91	474.647	3	32.63	1420.92	-3.1		99 98 94 88 88 96 97 97 90 79 83 81 97	LLGNVLVVVLRAR	CID
SQFDPNLTQR	10	91	603.318	2	13.54	1204.58	32		90 92 98 99 89 86 93 84 82 98	SQFDPNLTQR	CID
KDKATC(+57.02)VEKLLNK	13	91	516.293	3	13.29	1545.85	0.7	Carbamidomethylation	97 99 93 92 84 84 90 97 72 82 99 98 100	KDKATC(+57.02)VEKLLNK	CID
FWGKYLYELAR	11	91	482.591	3	26.02	1444.75	-0.3		92 93 90 96 99 99 99 99 95 61 79	FWGKYLYELAR	CID
EKVLTSDAR	9	91	509.779	2	8.37	1017.55	-2.4		93 92 98 99 94 86 89 77 94	EKVLTSDAR	CID
NTKSSGVNVGK	11	91	545.817	2	14.89	1089.58	37.2		81 92 97 98 90 75 86 93 95 97 100	NTKSSGVNVGK	CID
DPDTEQAALAAVDYLNKHLPR	21	91	779.735	3	31.59	2336.18	2.4		96 90 98 97 99 97 97 70 76 94 92 92 96 89 90 82 85 86 95 92 99	DPDTEQAALAAVDYLNKHLPR	CID
ALKAWWAR	8	91	501.3	2	56.2	1000.56	25.5		89 94 95 95 92 80 85 97	ALKAWWAR	CID
YERLAR	6	91	404.227	2	15.65	806.44	-1.2		87 94 89 88 90 98	YERLAR	CID
VSLLAALDEASKKLNAK	17	91	591.004	3	30.52	1770.03	-19.6		94 97 99 100 99 99 98 98 98 94 90 81 73 81 76 88 83	VSLLAALDEASKKLNAK	CID
GPNHAGAVVDK	11	91	532.801	2	4.95	1063.54	43.9		88 91 97 98 99 74 91 90 89 89 96	GPNHAGAVVDK	CID
YLC(+57.02)DNQDTLDSK	12	91	736.324	2	12.85	1470.63	3.2	Carbamidomethylation	92 95 98 96 85 80 93 90 90 91 87 95	YLC(+57.02)DNQDTLDSK	CID
LVTDLAGTVHK	11	91	577.351	2	14.33	1152.65	32.5		96 97 99 99 99 69 66 84 95 98 100	LVTDLAGTVHK	CID
YGKHTLNQLDSVQVWPR	17	91	511.031	4	19.85	2040.05	19.4		85 70 88 90 97 98 94 93 99 99 97 93 80 82 87 95 100	YGKHTLNQLDSVQVWPR	CID
DPALVELLK	9	91	499.299	2	31.47	996.586	-1.9		73 55 95 99 99 99 99 100 100	DPALVELLK	CID
RHPEYAWVLLR	11	91	720.412	2	21.74	1438.78	18.2		93 92 94 97 92 83 74 85 93 99 100	RHPEYAWVLLR	CID
HVTLEQPR	8	91	490.27	2	10.55	978.525	0.3		97 98 97 92 94 81 74 96	HVTLEQPR	CID
WQSLPR	6	91	393.716	2	14.01	785.418	-0.4		84 93 86 93 92 97	WQSLPR	CID
AMTNLR	6	91	353.187	2	9.2	704.364	-5.1		93 88 98 91 79 95	AMTNLR	CID
HLVDEKAC(+57.02)DLK	11	91	664.359	2	19.09	1326.66	33.1	Carbamidomethylation	97 99 99 99 99 91 71 82 84 94 93	HLVDEKAC(+57.02)DLK	CID
KDGKFSVLFTK	11	91	635.335	2	24.45	1268.71	-45.6		83 91 89 90 88 84 89 97 99 99 99	KDGKFSVLFTK	CID
FFKKFFQKFFKKFFKK	16	91	740.789	3	25.15	2219.28	29.1		92 91 91 92 72 67 93 96 98 98 96 95 95 95 97 98	FFKKFFQKFFKKFFKK	CID
SSQLHFLGR	9	91	522.787	2	19.18	1043.55	8		92 92 92 99 98 98 88 67 98	SSQLHFLGR	CID
KVEKLSMLDKLYLHPR	16	91	657.386	3	21.02	1969.12	9.3		95 93 96 96 96 82 48 95 98 97 98 93 95 91 94 99	KVEKLSMLDKLYLHPR	CID
QFATLVETK	9	91	518.813	2	15.17	1035.56	50.2		85 90 85 97 97 86 91 95 98	QFATLVETK	CID
AFDEKLFTFHADLC(+57.02)TLPDTEKQLK	24	91	956.498	3	27.91	2866.42	18.1	Carbamidomethylation	67 70 99 99 99 100 99 98 97 71 71 79 98 99 98 99 93 96 90 93 92 92 98 100	AFDEKLFTFHADLC(+57.02)TLPDTEKQLK	CID
EKVGVLTSSAQR	12	91	637.865	2	2.67	1273.7	13.5		91 87 96 85 92 94 93 93 87 92 91 98	EKVGVLTSSAQR	CID
FWRALKAVSSVAR	13	91	745.924	2	19.58	1489.85	-12		91 90 98 99 99 99 98 91 80 76 73 95 99	FWRALKAVSSVAR	CID
KGAC(+57.02)LLPKLETMR	13	91	758.932	2	20.62	1515.83	15	Carbamidomethylation	94 91 92 96 98 100 95 94 94 90 83 62 98	KGAC(+57.02)LLPKLETMR	CID
C(+57.02)FLQLVELSR	10	91	632.852	2	25.93	1263.66	20.4	Carbamidomethylation	72 77 97 98 99 98 96 90 90 96	C(+57.02)FLQLVELSR	CID
KFWR	4	91	318.673	2	2.59	635.354	-34.9		92 93 81 98	KFWR	CID
WLYGFQNELLVR	12	91	769.414	2	25.75	1536.81	3.2		67 79 97 91 95 93 90 96 96 96 96 99	WLYGFQNELLVR	CID
KDQYLPDWDKKR	12	91	796.426	2	18.35	1590.82	14.2		66 83 90 98 99 97 95 88 90 92 94 99	KDQYLPDWDKKR	CID
FGEKVLK	7	91	410.736	2	10.02	819.485	-33.8		98 90 96 85 73 97 98	FGEKVLK	CID
EFKTQEELTPFFK	13	91	822.431	2	24.22	1642.82	13.6		63 50 96 98 96 98 97 96 98 96 98 99 99	EFKTQEELTPFFK	CID
FTYEYSRR	8	91	561.274	2	12.12	1120.53	3.7		97 97 98 97 82 75 82 98	FTYEYSRR	CID
GVRPLC(+57.02)PGR	9	91	506.281	2	11.97	1010.54	2	Carbamidomethylation	76 86 90 79 97 98 96 95 100	GVRPLC(+57.02)PGR	CID
FFKKFFKFK	9	91	633.877	2	19.12	1265.73	5.5		91 93 91 95 98 97 96 71 85	FFKKFFKFK	CID
LKPDPNTLC(+57.02)DEFKADEKKFWGK	22	91	889.463	3	25.8	2665.32	17.7	Carbamidomethylation	97 95 97 99 94 92 87 96 95 97 99 95 94 90 92 88 73 76 85 87 79 91	LKPDPNTLC(+57.02)DEFKADEKKFWGK	CID
TFC(+57.02)PLTGLWPLNTLK	15	91	880.988	2	35.24	1759.93	15.9	Carbamidomethylation	60 66 98 99 99 99 94 97 97 90 92 88 90 96 97	TFC(+57.02)PLTGLWPLNTLK	CID
QGFPDATETDLQELVAKR	18	91	673.364	3	23.59	2017.01	28.5		54 61 98 98 98 98 98 99 99 99 99 95 98 96 92 87 86 97	QGFPDATETDLQELVAKR	CID
ETYGDMADC(+57.02)C(+57.02)AK	12	91	710.771	2	11.01	1419.51	11.4	Carbamidomethylation	93 90 95 90 97 83 94 96 89 88 88 98	ETYGDMADC(+57.02)C(+57.02)AK	CID
MYPEYAVSVLLR	12	91	480.945	3	20.6	1439.75	44.3		51 82 84 97 97 99 99 97 96 98 100 100	MYPEYAVSVLLR	CID
YGKHAKVSDLQNLEWPR	17	91	511.032	4	19.55	2040.05	22.8		85 72 90 89 95 98 99 99 99 98 87 72 97 96 90 92 99	YGKHAKVSDLQNLEWPR	CID
FKDLWEHFK	9	91	625.319	2	13.65	1248.63	-4		85 90 98 97 81 93 87 96 96	FKDLWEHFK	CID
FFESFGDLSSADALLGNVKPK	21	91	748.063	3	30.14	2241.13	15.6		93 95 99 98 95 85 95 97 94 93 95 97 95 93 94 71 80 85 86 84 98	FFESFGDLSSADALLGNVKPK	CID
FWGKYLYELVK	11	91	482.593	3	25.72	1444.78	-12.3		91 93 93 97 99 99 99 99 91 80 65	FWGKYLYELVK	CID
NLKQENFEVLC(+57.02)K	12	91	507.943	3	15.81	1520.77	28.2	Carbamidomethylation	81 92 89 87 93 83 92 98 93 95 95 98	NLKQENFEVLC(+57.02)K	CID
ELPEKYGLSDC(+57.02)C(+57.02)SR	14	91	857.396	2	14.4	1712.75	16.2	Carbamidomethylation	87 88 86 98 92 97 89 95 94 96 90 86 86 96	ELPEKYGLSDC(+57.02)C(+57.02)SR	CID
ELPC(+57.02)GK	6	91	352.174	2	4.82	702.337	-5	Carbamidomethylation	90 89 86 93 93 97	ELPC(+57.02)GK	CID
LSAADKGVNK	10	91	501.783	2	6.24	1001.55	1		95 95 96 97 95 92 86 80 82 96	LSAADKGVNK	CID
ALGGEDVTVR	10	91	508.774	2	13.93	1015.53	2.7		92 96 94 83 95 95 91 83 86 98	ALGGEDVTVR	CID
EHALKAWSVAR	11	91	423.258	3	14.92	1266.68	54.9		92 80 93 96 93 90 87 92 91 94 97	EHALKAWSVAR	CID
MSAALGHQER	10	91	550.261	2	11.74	1098.52	-14.9		63 88 77 99 99 97 97 95 98 99	MSAALGHQER	CID
TVMENFVAFVDKC(+57.02)C(+57.02)AADDKEAC(+57.02)FAVEGPK	29	91	827.89	4	29.35	3307.47	20	Carbamidomethylation	92 94 98 100 98 99 99 99 98 97 99 97 94 94 93 92 94 91 86 95 92 91 89 87 83 92 39 65 99	TVMENFVAFVDKC(+57.02)C(+57.02)AADDKEAC(+57.02)FAVEGPK	CID
AVEHLDDLPGALSELSDLHAHK	22	91	789.75	3	26.98	2366.19	17.4		83 86 95 93 96 77 70 85 95 92 96 98 98 97 95 88 91 91 88 95 98 100	AVEHLDDLPGALSELSDLHAHK	CID
DEEDYLSLLLNR	12	91	740.372	2	34.15	1478.73	3.1		56 66 93 99 99 99 98 99 99 96 92 98	DEEDYLSLLLNR	CID
NQVLNTK	7	91	408.731	2	5.83	815.45	-4.4		80 90 96 96 89 92 96	NQVLNTK	CID
LFTFHADLC(+57.02)TLPDTEQQLK	19	91	570.051	4	25.34	2276.11	25.6	Carbamidomethylation	98 97 97 95 90 92 94 94 97 98 99 94 95 86 91 45 87 87 93	LFTFHADLC(+57.02)TLPDTEQQLK	CID
FTYERYSR	8	91	561.275	2	11.4	1120.53	4.8		95 95 96 96 93 79 78 97	FTYERYSR	CID
NLDLLEGAVTSASK	14	91	709.39	2	24.58	1416.75	13.1		75 87 97 98 99 99 79 89 91 90 89 89 92 97	NLDLLEGAVTSASK	CID
DVSLQKFGER	10	91	589.79	2	16.71	1177.61	-36.6		79 61 94 98 96 97 98 90 98 99	DVSLQKFGER	CID
QLQKKTALVELLK	13	91	504.657	3	20.2	1510.94	3.1		84 87 86 76 79 91 94 97 96 97 97 99 99	QLQKKTALVELLK	CID
SLNSDRVTFK	10	91	583.851	2	13.2	1165.61	67.4		86 92 88 89 89 88 92 90 96 98	SLNSDRVTFK	CID
QFASALDPAAATK	13	91	645.849	2	15.44	1289.66	17.4		85 89 91 88 88 98 96 76 86 89 98 99 99	QFASALDPAAATK	CID
NALFDSADSAWK	12	90	662.823	2	27.68	1323.61	17.3		92 96 99 98 86 78 75 98 91 91 89 98	NALFDSADSAWK	CID
VANPTPR	7	90	377.713	2	8.05	753.413	-3.6		92 93 91 85 90 89 97	VANPTPR	CID
TLESQLTPQAVER	13	90	736.392	2	18.82	1470.77	1.2		54 69 99 98 97 99 99 94 93 93 90 96 99	TLESQLTPQAVER	CID
LYERLAR	7	90	460.77	2	15.71	919.524	1.8		95 92 96 86 83 85 97	LYERLAR	CID
GPNHAVVKRSDK	12	90	436.576	3	4.28	1306.71	-3.9		79 83 92 96 99 98 96 89 86 75 95 98	GPNHAVVKRSDK	CID
EGSVAR	6	90	309.67	2	11.87	617.313	20.4		92 73 92 95 95 98	EGSVAR	CID
VLDQYLFEEAR	11	90	691.872	2	27.87	1381.69	29.9		95 98 99 98 99 100 99 98 63 51 97	VLDQYLFEEAR	CID
DVSEVDLPK	9	90	501.277	2	14.02	1000.51	32		90 87 88 93 82 87 95 95 98	DVSEVDLPK	CID
NGTHTELLK	9	90	506.775	2	9.91	1011.53	0.5		67 59 98 98 98 99 99 100 100	NGTHTELLK	CID
AEFVEVTKLVTDLTKLSQKFPK	22	90	631.112	4	36.23	2520.42	0.2		95 98 99 98 97 94 91 93 96 94 88 89 89 84 85 89 78 73 77 91 95 100	AEFVEVTKLVTDLTKLSQKFPK	CID
AFTNLR	6	90	361.185	2	6.21	720.392	-51.5		84 85 91 90 96 98	AFTNLR	CID
RC(+57.02)ASLQKFGER	11	90	451.236	3	13.42	1350.68	1.5	Carbamidomethylation	94 81 72 90 95 94 96 98 81 95 99	RC(+57.02)ASLQKFGER	CID
AVFK	4	90	464.287	1	7.51	463.279	-0.2		84 84 96 98	AVFK	CID
NEFVEVTKLVTDLTK	15	90	868.486	2	40.38	1734.94	9.8		55 79 96 98 99 97 90 91 97 98 86 88 92 95 97	NEFVEVTKLVTDLTK	CID
DETGK	5	90	549.305	1	15.77	548.244	98.2		83 86 91 94 97	DETGK	CID
TGTHKSELAHR	11	90	412.872	3	5.88	1235.64	-33.7		90 70 92 86 88 82 96 97 95 97 100	TGTHKSELAHR	CID
FFKKKFFQFFKKFFKK	16	90	740.783	3	23.98	2219.28	20.3		94 94 96 96 67 60 90 95 98 98 95 90 89 90 95 99	FFKKKFFQFFKKFFKK	CID
SAEC(+57.02)PGPAQK	10	90	522.742	2	6.53	1043.47	-1.3	Carbamidomethylation	80 85 100 99 99 98 92 89 66 95	SAEC(+57.02)PGPAQK	CID
EQEPK	5	90	315.683	2	10.08	629.302	79.3		88 82 90 96 96	EQEPK	CID
VLSPAGPEAQFELR	14	90	757.407	2	23.19	1512.79	3.9		56 69 98 97 98 98 96 98 96 87 85 93 93 97	VLSPAGPEAQFELR	CID
FSYGGC(+57.02)KGDGNK	12	90	645.285	2	8.73	1288.55	4.1	Carbamidomethylation	92 95 97 89 80 87 91 93 97 76 88 98	FSYGGC(+57.02)KGDGNK	CID
TVEAC(+57.02)NLPLVGAGPC(+57.02)R	16	90	857.429	2	21.45	1712.83	5.4	Carbamidomethylation	68 71 86 97 98 97 99 99 99 99 90 94 92 74 82 100	TVEAC(+57.02)NLPLVGAGPC(+57.02)R	CID
QYGFC(+57.02)K	6	90	401.681	2	11.03	801.348	0.2	Carbamidomethylation	82 89 82 93 96 99	QYGFC(+57.02)K	CID
GSVQYLPDWDKKR	13	90	796.421	2	18.06	1590.82	7.5		70 85 83 96 99 100 95 96 83 93 86 90 98	GSVQYLPDWDKKR	CID
KAPQLTSPELMALTKR	16	90	892.513	2	22.36	1783	5		97 99 89 91 99 99 99 94 98 94 75 90 90 75 66 88	KAPQLTSPELMALTKR	CID
RSQKFPK	7	90	445.758	2	16.25	889.513	-14		86 84 82 91 92 96 99	RSQKFPK	CID
LWAPR	5	90	321.661	2	6.06	641.365	-88.2		82 79 95 97 98	LWAPR	CID
QLLKHFSLLTLMTNR	15	90	908.027	2	29.2	1814.02	8.3		46 65 98 98 99 100 99 99 99 99 99 78 88 86 97	QLLKHFSLLTLMTNR	CID
YGLVTYATEPK	11	90	621.324	2	18.91	1240.63	-0.1		94 91 99 99 99 94 92 90 96 54 81	YGLVTYATEPK	CID
TMKER	5	90	332.674	2	6.76	663.337	-4.8		93 73 90 97 97	TMKER	CID
KAAQVTLQSSGTFSTK	16	90	827.449	2	15.04	1652.87	5.7		88 55 66 93 96 99 99 95 96 97 86 93 95 91 93 98	KAAQVTLQSSGTFSTK	CID
LVEDLTK	7	90	409.237	2	15.8	816.459	-0.1		95 92 94 88 88 85 89	LVEDLTK	CID
DAENC(+57.02)HLAR	9	90	543.245	2	9.6	1084.47	3.6	Carbamidomethylation	92 92 94 85 76 79 97 95 98	DAENC(+57.02)HLAR	CID
RLNFALVR	8	90	494.806	2	19.96	987.598	0.3		94 82 65 92 97 98 99 100	RLNFALVR	CID
SGVLQKALGWDVR	13	90	714.903	2	18.4	1427.79	1.4		72 63 85 99 98 98 99 99 89 85 96 99 100	SGVLQKALGWDVR	CID
RTGKRLAR	8	90	479.283	2	8.46	956.599	-50		86 86 90 89 91 95 92 98	RTGKRLAR	CID
FFKKFFKKFFKKHREK	16	90	740.789	3	23.6	2219.29	25.9		85 89 97 97 96 95 96 99 99 99 98 93 51 82 77 97	FFKKFFKKFFKKHREK	CID
LRC(+57.02)ASLQKFWR	11	90	488.931	3	13.57	1463.78	-6.6	Carbamidomethylation	87 90 77 74 96 98 97 97 93 90 99	LRC(+57.02)ASLQKFWR	CID
SPKADASVAR	10	90	501.3	2	42.27	1000.53	56.2		79 81 92 96 96 94 96 86 89 98	SPKADASVAR	CID
QVPQVSTPTLVEVSRVTGK	19	90	675.734	3	24.45	2024.13	26.8		90 98 95 94 92 90 93 94 97 99 97 98 89 78 85 79 66 90 98	QVPQVSTPTLVEVSRVTGK	CID
FFKKHREKFFKKFFKK	16	90	740.788	3	24.46	2219.29	24.5		96 96 96 94 37 55 92 97 98 98 98 98 99 98 99 99	FFKKHREKFFKKFFKK	CID
VAPEFYDYDVALVR	14	90	828.932	2	30	1655.82	17.9		44 55 96 99 99 99 99 97 99 95 94 96 96 99	VAPEFYDYDVALVR	CID
LVKLDADDR	9	90	522.799	2	18.08	1043.56	20.8		95 95 94 89 89 76 89 91 97	LVKLDADDR	CID
QLPDPNTLC(+57.02)DEFKADEK	17	90	674	3	19.78	2018.93	26.5	Carbamidomethylation	50 80 92 97 96 93 94 97 94 96 97 91 90 87 92 97 96	QLPDPNTLC(+57.02)DEFKADEK	CID
KFFQFFKKFFQK	12	90	418.256	4	19.56	1668.92	46.1		89 95 89 94 99 97 97 98 95 90 46 97	KFFQFFKKFFQK	CID
SLLSELSDTLSHR	13	90	729.407	2	30.34	1456.75	32.7		73 89 98 99 99 99 96 97 82 88 92 66 97	SLLSELSDTLSHR	CID
YLC(+57.02)DNQHTLSSK	12	90	733.321	2	11.85	1464.67	-26.7	Carbamidomethylation	95 97 99 96 81 70 56 95 97 99 100 100	YLC(+57.02)DNQHTLSSK	CID
YSLQLWAFDAVK	12	90	720.886	2	32.03	1439.74	9.1		54 56 98 98 99 97 98 98 98 93 95 98	YSLQLWAFDAVK	CID
C(+57.02)C(+57.02)QSQEQEVC(+57.02)FTEEGPALLSKTR	23	90	919.762	3	22.87	2756.22	15.9	Carbamidomethylation	87 85 95 97 94 98 92 98 96 95 92 93 97 97 82 82 85 90 90 82 78 79 92	C(+57.02)C(+57.02)QSQEQEVC(+57.02)FTEEGPALLSKTR	CID
LETFREK	7	90	461.738	2	2.5	921.492	-33.4		94 97 93 71 89 96 91	LETFREK	CID
NLKQYVQEVLC(+57.02)K	12	90	507.942	3	16.34	1520.8	1.6	Carbamidomethylation	83 92 89 88 85 82 82 96 92 98 96 97	NLKQYVQEVLC(+57.02)K	CID
YGKHTLNQLDSVGAVWPR	18	90	511.032	4	20.18	2040.05	22.7		85 72 90 91 98 99 94 94 99 99 99 97 52 79 89 90 96 100	YGKHTLNQLDSVGAVWPR	CID
SPLPQLPK	8	90	440.257	2	14.84	878.523	-25.2		84 88 98 87 73 96 96 99	SPLPQLPK	CID
TTAVSTLKAVSSVAR	15	90	745.924	2	19.53	1489.85	-9		68 74 92 93 94 95 99 99 97 89 70 93 93 96 99	TTAVSTLKAVSSVAR	CID
TPLVGQPSLPGGPVR	15	90	737.932	2	21.81	1473.83	12.6		98 98 100 100 99 99 95 96 99 98 92 82 40 56 98	TPLVGQPSLPGGPVR	CID
FLGDGVNFDQLSSR	14	90	518.929	3	19.06	1553.75	11.1		98 99 98 99 79 85 68 88 77 93 99 96 95 98	FLGDGVNFDQLSSR	CID
STDSPRKEKTDTVR	14	90	540.618	3	8.19	1618.83	3.6		96 97 99 93 85 90 80 91 89 90 95 83 86 96	STDSPRKEKTDTVR	CID
ALKASVSVAR	10	90	501.304	2	52.98	1000.6	-10.3		82 90 90 97 86 82 95 91 95 98	ALKASVSVAR	CID
VTMENFVAFVDK	12	90	700.359	2	28.89	1398.69	12.8		85 88 94 98 90 93 95 92 86 89 93 86	VTMENFVAFVDK	CID
KGWEKPFEMK	10	90	427.222	3	15.22	1278.64	0		89 84 90 95 90 86 90 97 88 97	KGWEKPFEMK	CID
SWKNC(+57.02)EVR	8	90	539.76	2	8.96	1077.5	2.2	Carbamidomethylation	81 86 92 89 92 95 90 99	SWKNC(+57.02)EVR	CID
SLQKFGER	8	90	482.764	2	11.3	963.514	-0.8		89 93 95 91 93 75 90 98	SLQKFGER	CID
LSAADKRNK	9	90	501.784	2	6.29	1001.56	-8.3		95 96 98 95 95 85 87 71 93	LSAADKRNK	CID
QLHHTLLAPADR	12	90	686.403	2	14.39	1370.74	36.8		83 89 97 99 99 99 99 97 73 78 75 99	QLHHTLLAPADR	CID
NNPQAQR	7	90	414.221	2	7.12	826.404	27.5		86 94 95 90 89 85 94	NNPQAQR	CID
SLQKFWR	7	90	482.764	2	11.39	963.529	-16.3		84 89 93 92 95 84 95	SLQKFWR	CID
TVFTDVVAEKDLFHC(+57.02)VSFTLPR	22	90	861.125	3	34.05	2580.3	18.3	Carbamidomethylation	59 72 98 99 99 99 99 97 98 93 95 99 97 95 97 95 82 75 73 84 82 98	TVFTDVVAEKDLFHC(+57.02)VSFTLPR	CID
QQFLLVQVK	9	90	551.84	2	26.58	1101.65	9.1		83 91 98 98 98 80 76 91 96	QQFLLVQVK	CID
FTYEYRSR	8	90	561.274	2	11.35	1120.53	3.6		96 97 98 94 79 86 74 97	FTYEYRSR	CID
GVGAEEQLVPR	11	90	577.82	2	12.1	1153.61	14.9		75 90 75 86 92 94 90 96 96 98 100	GVGAEEQLVPR	CID
LFTFHWLC(+57.02)TLPDTEKQLK	18	90	570.05	4	25.68	2276.17	2.7	Carbamidomethylation	98 96 94 84 79 86 93 84 82 98 93 95 87 92 82 89 93 98	LFTFHWLC(+57.02)TLPDTEKQLK	CID
WLNVSGGAPR	10	90	528.79	2	11.14	1055.55	14.4		90 92 79 77 93 90 90 93 97 99	WLNVSGGAPR	CID
VSC(+57.02)KKFDLR	9	90	576.816	2	11.05	1151.61	5.2	Carbamidomethylation	88 90 86 84 91 85 90 96 99	VSC(+57.02)KKFDLR	CID
SSQLHFVVK	9	90	522.797	2	18.55	1043.58	3.6		90 90 85 98 96 98 96 83 72	SSQLHFVVK	CID
VVTGVANALAHHYR	14	90	754.421	2	16.93	1506.81	14.4		97 97 99 97 98 98 98 97 99 96 89 67 37 91	VVTGVANALAHHYR	CID
LVTDLQTVHK	10	90	577.354	2	13.89	1152.65	36.6		93 96 99 99 97 52 74 91 96 99	LVTDLQTVHK	CID
NLQKYVQEVLC(+57.02)K	12	90	507.943	3	15.76	1520.8	3.7	Carbamidomethylation	84 92 86 85 86 89 87 97 96 96 89 91	NLQKYVQEVLC(+57.02)K	CID
GYKHTLNQLDSVK	13	89	501.604	3	13.13	1501.79	1.5		34 56 96 95 99 99 97 96 99 99 98 98 99	GYKHTLNQLDSVK	CID
VYLGGGLK	8	89	403.741	2	16.01	805.47	-2.4		95 96 99 85 78 76 94 97	VYLGGGLK	CID
KLNAK	5	89	573.337	1	2.84	572.365	-61.7		75 95 88 96 94	KLNAK	CID
LSAGKFPK	8	89	424.253	2	55.34	846.496	-6.3		93 92 92 77 87 91 89 96	LSAGKFPK	CID
LMTDLTK	7	89	411.234	2	13.87	820.437	20		90 75 92 92 91 92 95	LMTDLTK	CID
FMETATESLAKYNSESPSK	19	89	707.333	3	19.06	2118.98	0.3		95 89 99 98 94 85 93 92 96 95 93 86 70 70 85 86 87 92 96	FMETATESLAKYNSESPSK	CID
EESSPDSAEDKVR	13	89	724.804	2	10.07	1447.64	-33.5		62 66 95 99 97 99 99 99 99 94 82 75 97	EESSPDSAEDKVR	CID
MFYDLR	6	89	422.693	2	16.3	843.395	-28.6		62 85 95 98 99 99	MFYDLR	CID
NLKKYVQEVLC(+57.02)K	12	89	507.942	3	15.96	1520.84	-23.1	Carbamidomethylation	81 90 90 87 81 80 82 98 96 97 93 97	NLKKYVQEVLC(+57.02)K	CID
QKFPK	5	89	324.195	2	10.28	646.38	-6.4		79 91 82 96 98	QKFPK	CID
FVGDDTK	7	89	391.193	2	14.36	780.365	8.2		85 87 70 93 95 97 98	FVGDDTK	CID
LFQMK	5	89	333.686	2	13.91	665.357	1.4		93 90 89 79 96	LFQMK	CID
YLC(+57.02)DKNHTLSSK	12	89	733.318	2	11.6	1464.7	-56.3	Carbamidomethylation	90 96 95 96 86 75 48 95 96 97 99 100	YLC(+57.02)DKNHTLSSK	CID
FFKRHKKFKFFKFEKK	16	89	444.87	5	23.32	2219.29	11.1		97 97 97 82 35 88 96 95 96 95 92 92 94 92 83 96	FFKRHKKFKFFKFEKK	CID
VLTMSAR	7	89	389.207	2	6.72	776.421	-27.5		94 97 97 71 88 85 91	VLTMSAR	CID
LSQASC(+57.02)PK	8	89	445.758	2	13.51	889.433	76.3	Carbamidomethylation	86 95 95 85 88 76 94 95	LSQASC(+57.02)PK	CID
LHLKPGR	7	89	410.76	2	8.6	819.508	-1.8		93 89 98 89 80 79 96	LHLKPGR	CID
THKPELAHR	9	89	363.522	3	3.09	1087.59	-39.9		92 77 78 71 95 97 97 95 99	THKPELAHR	CID
QDTLSSK	7	89	389.697	2	4.48	777.387	-8.1		75 91 89 90 88 93 97	QDTLSSK	CID
SYLQLWAFDAVK	12	89	720.882	2	31.48	1439.74	3		50 56 98 97 99 97 97 97 95 91 93 98	SYLQLWAFDAVK	CID
VTMNMC(+57.02)RK	8	89	520.244	2	9.65	1038.48	-3.1	Carbamidomethylation	95 96 91 94 90 81 78 86	VTMNMC(+57.02)RK	CID
MGDAADDKEAC(+57.02)FAVEGPK	18	89	955.895	2	18.51	1909.82	-22.3	Carbamidomethylation	57 28 51 95 97 99 99 98 99 99 99 98 98 96 98 92 97 99	MGDAADDKEAC(+57.02)FAVEGPK	CID
NLKAWSVAR	9	89	522.804	2	19.07	1043.59	5		72 85 87 98 89 92 94 94 98	NLKAWSVAR	CID
DPALVELLKHQPK	13	89	496.638	3	25.68	1486.85	27.2		74 56 96 99 97 97 96 98 96 90 75 95 98	DPALVELLKHQPK	CID
FFKKFFKKFFKQFFKK	16	89	740.788	3	24.2	2219.28	28.2		95 92 97 97 63 54 84 97 99 98 89 93 89 91 98 100	FFKKFFKKFFKQFFKK	CID
GYKHTLNQLDSVKVEGPR	18	89	681.043	3	20.37	2040.08	15.8		73 85 91 96 98 98 88 89 98 99 97 95 92 90 82 57 87 99	GYKHTLNQLDSVKVEGPR	CID
TVEAC(+57.02)NLPLVQGPC(+57.02)R	15	89	857.436	2	21.62	1712.83	14	Carbamidomethylation	61 70 86 98 99 99 99 97 98 98 92 77 80 90 100	TVEAC(+57.02)NLPLVQGPC(+57.02)R	CID
WDDYKEC(+57.02)YLAMVPSHAVVAR	20	89	804.054	3	26	2409.12	6.5	Carbamidomethylation	85 98 97 90 91 97 95 92 96 97 86 95 82 85 79 82 81 81 83 96	WDDYKEC(+57.02)YLAMVPSHAVVAR	CID
LLSTLC(+57.02)SWVC(+57.02)KC(+57.02)AEGKC(+57.02)PR	19	89	775.695	3	19.2	2324.09	-11	Carbamidomethylation	97 98 99 99 99 98 96 93 95 93 90 93 86 91 66 83 79 56 92	LLSTLC(+57.02)SWVC(+57.02)KC(+57.02)AEGKC(+57.02)PR	CID
SPRLVYTR	8	89	496.307	2	15.05	990.561	39.3		86 82 90 86 89 93 92 99	SPRLVYTR	CID
LRC(+57.02)ASLQKFGER	12	89	488.931	3	13.62	1463.77	3.4	Carbamidomethylation	88 91 78 75 96 98 97 97 94 68 93 99	LRC(+57.02)ASLQKFGER	CID
VWPR	4	89	557.323	1	10.93	556.312	6.5		82 79 97 100	VWPR	CID
EEVGGEALGR	10	89	508.772	2	14.6	1015.49	34.9		90 92 89 84 78 94 91 93 85 97	EEVGGEALGR	CID
MLTSSAR	7	89	383.205	2	6.31	764.385	13.1		69 93 90 92 93 93 96	MLTSSAR	CID
TMLEYR	6	89	406.702	2	13.15	811.39	-0.2		86 73 90 94 94 97	TMLEYR	CID
VSESLSLKLPPNVVEEWK	18	89	685.381	3	25.89	2053.11	6.4		90 94 98 97 97 95 96 95 99 97 92 88 96 95 97 94 35 51	VSESLSLKLPPNVVEEWK	CID
MASALGHQER	10	89	550.261	2	12.46	1098.52	-14.1		55 83 72 98 99 97 97 92 98 99	MASALGHQER	CID
DVPLR	5	89	300.19	2	10.17	598.344	36.4		90 81 81 95 98	DVPLR	CID
KQLAQKKFFKKFFKFEK	17	89	740.789	3	23.55	2219.3	21.4		89 85 45 49 91 97 96 97 97 99 99 98 98 96 90 89 98	KQLAQKKFFKKFFKFEK	CID
ALKAYAAVAR	10	89	517.294	2	15.56	1032.61	-32.7		91 96 97 96 80 67 83 87 93 98	ALKAYAAVAR	CID
FAGTWYAMAK	10	89	573.278	2	21.89	1144.54	3.8		96 97 96 92 87 91 92 62 82 93	FAGTWYAMAK	CID
ALKAGESVAR	10	89	501.301	2	41.16	1000.57	21.8		87 95 92 97 77 96 86 81 90 97	ALKAGESVAR	CID
ALKAWTRR	8	89	501.302	2	53.23	1000.59	-3.5		88 94 92 92 82 90 85 97	ALKAWTRR	CID
ALKAWDAAR	9	89	501.301	2	43.55	1000.55	42.9		90 96 93 96 93 95 57 89 97	ALKAWDAAR	CID
ALTVTKVSQKFPK	13	89	723.946	2	15.89	1445.86	12		56 70 97 98 99 99 95 90 85 86 95 98 99	ALTVTKVSQKFPK	CID
KDLQKALGGEDVR	13	89	714.902	2	17.97	1427.77	11.9		48 74 95 95 97 98 99 89 82 94 97 98 99	KDLQKALGGEDVR	CID
QTALVELLKHKPKATEEQLK	20	89	576.843	4	20.05	2303.32	9.1		82 89 93 96 95 95 94 95 91 84 90 86 82 85 82 90 90 81 94 97	QTALVELLKHKPKATEEQLK	CID
LWYGFQNALLVR	12	89	740.416	2	59.48	1478.8	9.2		82 86 94 92 95 89 85 88 84 92 90 97	LWYGFQNALLVR	CID
VASYGVKPK	9	89	474.778	2	7.18	947.544	-2		92 93 94 89 73 85 93 90 95	VASYGVKPK	CID
WFLGSFLGAPDAMR	14	89	784.389	2	31.3	1566.77	-1.4		82 95 99 98 98 97 98 79 85 85 97 88 59 95	WFLGSFLGAPDAMR	CID
QPC(+57.02)DQFEKLGEYGFKNALLVR	21	89	838.082	3	30.15	2511.26	-12.8	Carbamidomethylation	80 38 57 95 93 97 99 77 85 96 99 99 98 98 92 89 91 99 99 98 99	QPC(+57.02)DQFEKLGEYGFKNALLVR	CID
VLTSWR	6	89	381.21	2	5.57	760.423	-24		94 97 95 83 74 93	VLTSWR	CID
KLPDPNTLC(+57.02)DEFKADEKKFWGKYLYELAR	29	89	715.776	5	29.79	3573.8	13.7	Carbamidomethylation	68 83 95 98 80 80 93 99 95 95 97 87 88 88 94 92 85 87 88 86 75 88 92 95 93 95 89 88 98	KLPDPNTLC(+57.02)DEFKADEKKFWGKYLYELAR	CID
QELLAEKQYGFC(+57.02)K	13	89	807.389	2	22.8	1612.79	-17.3	Carbamidomethylation	34 59 92 98 99 99 96 96 98 94 98 98 99	QELLAEKQYGFC(+57.02)K	CID
LNDYVEKSGHGKLVELVK	18	89	676.717	3	17.52	2027.11	11.5		98 96 99 99 97 97 91 56 29 85 92 90 92 89 98 99 99 99	LNDYVEKSGHGKLVELVK	CID
VASLRETYGDMADC(+57.02)C(+57.02)EK	17	89	668.961	3	15.89	2003.84	10.6	Carbamidomethylation	97 97 97 90 56 72 92 97 97 99 97 98 97 96 63 76 96	VASLRETYGDMADC(+57.02)C(+57.02)EK	CID
EAMENFVAFVGK	12	89	671.357	2	28.49	1340.64	41.8		54 60 91 99 97 98 96 96 95 98 90 97	EAMENFVAFVGK	CID
LKAWWAR	7	89	465.78	2	14.63	929.524	23.7		96 95 97 91 59 87 98	LKAWWAR	CID
SATSRDPVFFR	11	89	641.838	2	17.52	1281.65	11.7		84 86 92 90 85 78 69 98 98 99 100	SATSRDPVFFR	CID
C(+57.02)TVADESHAGC(+57.02)EKSLHTLFGDELC(+57.02)K	25	89	955.448	3	21.31	2863.26	22.2	Carbamidomethylation	68 76 98 99 92 93 99 98 98 49 57 74 81 85 97 97 99 99 96 79 95 99 98 98 99	C(+57.02)TVADESHAGC(+57.02)EKSLHTLFGDELC(+57.02)K	CID
LKDPPNTLC(+57.02)DEFKADEKKFWGK	22	89	534.076	5	25.24	2665.32	7.6	Carbamidomethylation	92 88 90 76 76 75 95 98 98 98 96 91 93 92 95 97 93 91 80 79 68 91	LKDPPNTLC(+57.02)DEFKADEKKFWGK	CID
LVGGC(+57.02)VSKPHSWPWQVRVTR	20	88	470.653	5	22.92	2348.23	-1.5	Carbamidomethylation	98 97 89 83 92 94 94 94 92 90 93 89 81 81 79 82 89 81 81 96	LVGGC(+57.02)VSKPHSWPWQVRVTR	CID
STLFGDELC(+57.02)KVASLR	15	88	565.938	3	26.82	1694.87	-44	Carbamidomethylation	79 83 88 93 77 92 96 95 93 93 92 88 80 86 97	STLFGDELC(+57.02)KVASLR	CID
GYLFLDEAHLTEALTWLAQK	20	88	773.744	3	38.48	2318.19	6.6		25 45 97 99 99 96 96 95 96 97 95 98 96 95 92 88 94 91 89 96	GYLFLDEAHLTEALTWLAQK	CID
HSKKQTALVELLK	13	88	747.969	2	24.74	1493.89	20.9		33 46 92 97 97 98 97 98 98 99 99 100 100	HSKKQTALVELLK	CID
EANSDVRTFK	10	88	583.811	2	13.68	1165.57	29.9		94 95 90 90 88 68 79 87 97 99	EANSDVRTFK	CID
VATPMNAEENR	11	88	616.291	2	11.54	1230.57	1.5		92 94 98 88 72 88 90 95 89 75 92	VATPMNAEENR	CID
KVGSQYR	7	88	419.23	2	4.34	836.45	-5.6		94 98 86 86 79 81 95	KVGSQYR	CID
GYKHTLDQLDSVKVWPR	17	88	511.278	4	21.57	2041.07	3.3		32 52 90 88 96 98 99 95 96 98 97 96 96 93 89 92 99	GYKHTLDQLDSVKVWPR	CID
AFLDC(+57.02)C(+57.02)EYLTQLR	13	88	844.899	2	25.6	1687.77	7.8	Carbamidomethylation	45 50 96 99 99 98 99 99 99 92 85 93 98	AFLDC(+57.02)C(+57.02)EYLTQLR	CID
SPLPGALPK	9	88	440.257	2	14.66	878.523	-26.7		76 82 98 96 82 78 97 92 96	SPLPGALPK	CID
SGEVQAFK	8	88	433.225	2	11.47	864.434	1.9		93 84 94 79 77 88 95 98	SGEVQAFK	CID
VTFELVYEELLAR	13	88	791.431	2	34.88	1580.85	1.5		45 50 97 99 99 99 98 98 98 89 91 92 97	VTFELVYEELLAR	CID
DTHKDELAHR	10	88	611.304	2	5.05	1220.59	3		92 90 88 96 91 92 89 79 72 98	DTHKDELAHR	CID
YNGVFQEC(+57.02)C(+57.02)QAEDKQC(+57.02)LLPK	20	88	829.712	3	22.05	2486.1	4.3	Carbamidomethylation	94 92 95 98 99 98 99 93 86 79 88 95 90 78 63 61 74 90 96 99	YNGVFQEC(+57.02)C(+57.02)QAEDKQC(+57.02)LLPK	CID
QQNC(+57.02)QGGFSSTQDTVVALHALSR	23	88	835.406	3	23.6	2503.19	3.1	Carbamidomethylation	32 33 90 94 96 95 88 95 98 98 94 92 97 95 92 95 95 97 92 93 93 90 94	QQNC(+57.02)QGGFSSTQDTVVALHALSR	CID
TWGHQER	7	88	457.218	2	12.22	912.42	0.7		79 84 88 95 83 92 97	TWGHQER	CID
LVGGC(+57.02)VSKPHSSVPWQVRVTR	21	88	470.652	5	22.87	2348.25	-12.5	Carbamidomethylation	98 98 92 89 96 96 95 95 94 93 91 87 79 82 82 79 80 86 72 76 96	LVGGC(+57.02)VSKPHSSVPWQVRVTR	CID
WFVWKGHAWAR	11	88	722.37	2	18.46	1442.74	-7.6		80 96 95 95 92 85 86 81 79 86 96	WFVWKGHAWAR	CID
APTAATKR	8	88	408.238	2	9.48	814.466	-4.7		97 95 94 90 86 79 70 94	APTAATKR	CID
FGDELC(+57.02)K	7	88	434.721	2	12.32	867.38	55	Carbamidomethylation	86 80 92 93 89 86 91	FGDELC(+57.02)K	CID
DPTEQAALAAVDYLNK	16	88	859.939	2	24.79	1717.85	6.7		57 39 62 79 96 99 99 99 99 98 97 99 98 97 94 98	DPTEQAALAAVDYLNK	CID
KGFPDATETDLQELVAK	17	88	931.487	2	24.7	1860.95	6.6		68 57 98 51 67 97 98 99 98 98 97 91 95 94 93 96 98	KGFPDATETDLQELVAK	CID
FFKKFHRKKFFKFKEK	16	88	444.87	5	23.27	2219.29	11.9		99 99 98 94 90 31 60 96 96 91 92 98 94 90 87 96	FFKKFHRKKFFKFKEK	CID
WGFVEVTKLVTDLTK	15	88	868.485	2	40.44	1734.96	0.3		68 59 96 98 99 94 94 92 95 93 86 88 82 80 93	WGFVEVTKLVTDLTK	CID
C(+57.02)PGRLR	6	88	379.707	2	9.98	757.402	-3.6	Carbamidomethylation	90 80 73 90 95 99	C(+57.02)PGRLR	CID
C(+57.02)HTGLGR	7	88	400.693	2	5.87	799.376	-5.3	Carbamidomethylation	91 90 93 76 90 77 98	C(+57.02)HTGLGR	CID
LQAWSVAR	8	88	465.78	2	15.12	929.508	39.4		95 92 97 93 69 68 90 98	LQAWSVAR	CID
KGAC(+57.02)LLPK	8	88	443.762	2	12.92	885.511	-1.3	Carbamidomethylation	95 93 90 51 77 98 99 100	KGAC(+57.02)LLPK	CID
SPDLEPVLR	9	88	513.282	2	20.05	1024.56	-5.7		95 94 99 99 99 84 85 52 90	SPDLEPVLR	CID
KTALLHLLK	9	88	518.808	2	25.73	1035.68	-76.2		74 92 93 95 90 65 95 96 97	KTALLHLLK	CID
C(+57.02)C(+57.02)TKPESERMC(+57.02)PTEDYLSLLLNR	23	88	958.128	3	29.8	2871.3	20.9	Carbamidomethylation	100 100 100 100 99 100 95 96 73 44 49 34 96 99 99 98 98 96 98 97 88 83 97	C(+57.02)C(+57.02)TKPESERMC(+57.02)PTEDYLSLLLNR	CID
VYLGPMR	7	88	418.228	2	17.22	834.442	-1.6		94 96 99 94 75 62 98	VYLGPMR	CID
DLVDPTKC(+57.02)NLLAEKQYGFC(+57.02)KGSVLQK	26	88	1004.54	3	22.47	3010.53	19.8	Carbamidomethylation	59 60 97 100 97 96 91 94 62 75 84 98 96 90 90 98 90 93 90 88 75 86 95 98 98 99	DLVDPTKC(+57.02)NLLAEKQYGFC(+57.02)KGSVLQK	CID
LAKAWSVAR	9	88	501.3	2	52.92	1000.58	3.1		89 86 91 97 93 82 80 82 96	LAKAWSVAR	CID
YLC(+57.02)DQNHTLSSK	12	88	733.323	2	11.88	1464.67	-23.9	Carbamidomethylation	95 97 97 95 81 75 31 95 97 98 99 100	YLC(+57.02)DQNHTLSSK	CID
FADRALKAWSVAR	13	88	745.923	2	19.63	1489.82	10.6		77 79 84 96 90 95 94 91 90 88 79 84 98	FADRALKAWSVAR	CID
VPQVSTVVLVEFPLLEK	17	88	633.034	3	26.05	1896.1	-8.1		98 95 97 96 87 79 57 70 82 90 97 90 82 91 94 97 98	VPQVSTVVLVEFPLLEK	CID
LETMAGER	8	88	453.739	2	6.27	905.428	38.6		90 97 99 81 82 71 91 94	LETMAGER	CID
AHSLPGGPVR	10	88	495.774	2	19.01	989.541	-6.9		83 77 95 97 97 90 82 78 85 96	AHSLPGGPVR	CID
FMETATESLAKYNSESPSKQYSLVKLTK	28	88	636.934	5	23.45	3179.61	8.6		95 91 99 99 99 98 98 95 96 95 93 91 86 79 92 65 32 73 73 78 85 85 90 91 94 97 99 99	FMETATESLAKYNSESPSKQYSLVKLTK	CID
DTHKSDVYTK	10	88	597.308	2	2.57	1192.57	24.4		89 91 90 96 88 86 82 77 85 96	DTHKSDVYTK	CID
SAADKGVNK	9	88	445.241	2	8.69	888.466	0.6		92 94 98 97 88 72 80 83 86	SAADKGVNK	CID
KFLFC(+57.02)FLTK	9	88	602.363	2	22.71	1202.65	49.1	Carbamidomethylation	68 89 94 90 69 91 96 98 97	KFLFC(+57.02)FLTK	CID
TAEEQLKTVMENFVAFVDK	19	88	733.713	3	36.24	2198.09	11.7		41 44 96 94 89 93 88 91 98 96 99 97 97 95 92 91 90 94 84	TAEEQLKTVMENFVAFVDK	CID
FFKKFHRKFEKK	12	88	418.255	4	20.65	1668.96	18.4		95 94 90 82 88 67 95 92 80 82 92 96	FFKKFHRKFEKK	CID
YGLVTYGFPPK	11	88	621.327	2	19.18	1240.65	-7.1		93 89 99 98 98 91 72 78 65 87 96	YGLVTYGFPPK	CID
LSQFPLSGAEK	11	88	588.828	2	19.92	1175.62	19.5		93 93 93 93 92 96 94 86 70 73 82	LSQFPLSGAEK	CID
LLESTLKSLDEC(+57.02)C(+57.02)HSESSTAC(+57.02)LNAK	25	88	714.091	4	20.07	2852.3	12.3	Carbamidomethylation	99 99 99 95 96 97 95 93 94 96 93 49 43 79 88 91 85 87 89 90 88 91 89 96 99	LLESTLKSLDEC(+57.02)C(+57.02)HSESSTAC(+57.02)LNAK	CID
AERLR	5	88	322.691	2	7.46	643.376	-13.1		71 85 90 98 99	AERLR	CID
KYASRSAAHLPK	12	88	664.877	2	14.19	1327.74	2.3		95 99 94 89 88 80 67 59 95 99 99 100	KYASRSAAHLPK	CID
VAPLGEEFLDGGAR	14	88	477.587	3	17.21	1429.72	12.5		96 97 99 99 92 98 98 86 79 79 54 75 92 99	VAPLGEEFLDGGAR	CID
C(+57.02)C(+57.02)DSVSEDC(+57.02)LKELPEYAVK	19	88	768.018	3	21.65	2301	15.5	Carbamidomethylation	99 99 99 99 99 97 96 95 90 90 91 96 91 28 51 83 88 94 97	C(+57.02)C(+57.02)DSVSEDC(+57.02)LKELPEYAVK	CID
ALKADASVAR	10	88	501.303	2	56.13	1000.57	24.1		82 92 95 95 91 83 86 80 84 95	ALKADASVAR	CID
LALFVGGGLVNPTAK	15	88	728.921	2	23.34	1455.85	-11.5		91 90 98 99 99 95 67 60 92 93 95 96 97 70 84	LALFVGGGLVNPTAK	CID
YLC(+57.02)DNQDTMKLVGK	14	88	562.283	3	15.49	1683.8	18.9	Carbamidomethylation	96 98 99 99 95 94 98 96 41 84 72 90 81 95	YLC(+57.02)DNQDTMKLVGK	CID
SLNSDVRTFK	10	88	583.815	2	13.25	1165.61	5.2		91 95 90 88 87 69 82 88 95 98	SLNSDVRTFK	CID
MDGAADDKEAC(+57.02)FAVEGPK	18	88	955.908	2	18.23	1909.82	-9.3	Carbamidomethylation	50 57 21 95 98 99 99 98 99 99 99 98 98 96 98 91 96 99	MDGAADDKEAC(+57.02)FAVEGPK	CID
KPSQKKQFFKKFFKFEK	17	88	740.791	3	22.9	2219.26	40.2		88 56 35 87 95 95 93 96 97 99 98 97 97 96 89 87 97	KPSQKKQFFKKFFKFEK	CID
KDC(+57.02)LPKQYK	9	88	590.318	2	13.25	1178.61	7.4	Carbamidomethylation	72 88 95 95 82 82 85 95 99	KDC(+57.02)LPKQYK	CID
TTSGLNPR	8	88	423.227	2	4.84	844.44	-0.8		90 93 95 83 93 89 74 88	TTSGLNPR	CID
LHKPK	5	88	311.702	2	2.79	621.396	-9.9		96 90 95 90 69	LHKPK	CID
YSATESLVNR	10	88	570.248	2	11.79	1138.56	-70.9		78 81 79 97 97 92 93 84 84 95	YSATESLVNR	CID
ALKAWTLAR	9	88	515.297	2	15.76	1028.61	-32.3		89 94 92 97 90 71 83 79 97	ALKAWTLAR	CID
LLEAAEAHHPK	11	88	608.318	2	16.38	1214.64	-15.8		98 98 99 97 85 93 88 51 90 78 90	LLEAAEAHHPK	CID
RLQGHAVKETDDTSHQEAAC(+57.02)HK	22	88	630.294	4	10.86	2517.18	-11.8	Carbamidomethylation	96 99 92 33 40 92 96 97 99 99 98 96 92 86 77 82 95 92 92 93 92 98	RLQGHAVKETDDTSHQEAAC(+57.02)HK	CID
LQEVLHADSGPC(+57.02)LPHLLSR	19	88	536.298	4	22.57	2141.11	26.7	Carbamidomethylation	92 90 98 97 96 90 68 82 83 75 78 84 90 85 86 95 93 90 97	LQEVLHADSGPC(+57.02)LPHLLSR	CID
RWGLSNAPR	9	87	528.789	2	11.68	1055.56	0.1		96 93 76 94 87 82 72 90 99	RWGLSNAPR	CID
DPPLYDLLPVK	11	87	635.396	2	34.18	1268.7	59.8		93 84 86 92 86 86 86 92 82 86 90	DPPLYDLLPVK	CID
YNSENKSGNQFVLYR	15	87	606.966	3	17.62	1817.87	3.8		91 89 89 92 79 82 91 76 79 80 85 92 95 95 99	YNSENKSGNQFVLYR	CID
VPSEKVTK	8	87	444.262	2	7.8	886.512	-2.5		68 59 93 97 94 96 96 99	VPSEKVTK	CID
NQPGVYTK	8	87	453.753	2	6.27	905.461	34.5		83 89 86 74 86 90 95 98	NQPGVYTK	CID
C(+57.02)KGWLQK	7	87	460.255	2	6.22	918.475	22.2	Carbamidomethylation	80 84 79 83 92 95 99	C(+57.02)KGWLQK	CID
AHLAFKPTVAQQR	13	87	733.917	2	14.58	1465.82	2.4		92 90 99 99 99 98 85 86 82 82 68 66 93	AHLAFKPTVAQQR	CID
DHYDLR	6	87	409.691	2	8.27	817.372	-5.3		88 79 82 94 89 95	DHYDLR	CID
TAGWNLPMGLLYSK	14	87	775.909	2	31.83	1549.8	4.1		59 62 90 94 96 99 91 78 74 93 97 98 97 99	TAGWNLPMGLLYSK	CID
GKTAGLVR	8	87	401.249	2	7.56	800.487	-4		71 86 93 94 81 92 87 96	GKTAGLVR	CID
LPENVVVKDVPPK	13	87	478.599	3	12.82	1432.83	-36.8		96 93 96 88 90 94 94 94 96 78 82 59 79	LPENVVVKDVPPK	CID
ASFSVLGDLLGSAMR	15	87	762.402	2	35.53	1522.78	5.6		49 51 80 95 98 100 99 100 100 99 96 96 92 63 96	ASFSVLGDLLGSAMR	CID
LETFR	5	87	333.166	2	4.42	664.354	-56.4		88 96 93 62 97	LETFR	CID
LPNSTVKHR	9	87	526.31	2	20.94	1050.59	11.6		88 74 75 94 96 96 95 74 97	LPNSTVKHR	CID
DHEKVLTSSAR	11	87	621.844	2	7.43	1241.64	29.7		88 73 90 82 95 97 95 91 79 77 94	DHEKVLTSSAR	CID
FNPFASK	7	87	405.707	2	4.49	809.407	-10		73 79 69 95 97 99 100	FNPFASK	CID
FFKKFFQKFFKRHKEK	16	87	444.87	5	23.47	2219.25	27.8		96 97 97 98 98 96 95 96 98 96 91 51 21 82 90 97	FFKKFFQKFFKRHKEK	CID
AALR	4	87	430.267	1	13.46	429.27	-24.1		85 83 95 87	AALR	CID
LQHQDWTGGKEFK	13	87	787.394	2	13.3	1572.77	2.9		86 85 94 96 98 90 89 70 65 82 94 90 96	LQHQDWTGGKEFK	CID
TLSEEK	6	87	353.681	2	5.62	705.354	-10.9		82 90 81 90 88 92	TLSEEK	CID
SQPEKGYLAVAVVK	14	87	496.952	3	19.7	1487.83	-0.7		41 46 88 97 94 89 97 99 98 93 93 94 97 98	SQPEKGYLAVAVVK	CID
LQENYYDKPLLEK	13	87	551.606	3	13.09	1651.85	-29.3		95 94 98 93 41 38 93 95 96 97 97 99 99	LQENYYDKPLLEK	CID
TANSAEEKAAVTSLFAK	17	87	869.462	2	32.24	1736.89	8.9		38 41 56 95 97 99 99 97 97 98 98 92 89 96 96 98 100	TANSAEEKAAVTSLFAK	CID
FEYSYR	6	87	432.716	2	13.72	863.381	42.9		75 89 86 89 90 96	FEYSYR	CID
LGEYGFQNALLVR	13	87	740.415	2	51.44	1478.79	18.6		84 69 82 90 89 95 89 86 90 91 92 88 89	LGEYGFQNALLVR	CID
TQVADAKNYLEK	12	87	460.577	3	13.98	1378.71	-0.2		96 96 98 95 97 93 92 85 41 62 96 96	TQVADAKNYLEK	CID
YSSC(+57.02)PEEHR	9	87	582.756	2	7.96	1163.47	25.8	Carbamidomethylation	77 82 94 88 77 90 92 86 98	YSSC(+57.02)PEEHR	CID
GLEHLDDLPGALSELSDLHAHK	22	87	789.74	3	27.28	2366.19	5.1		20 50 93 93 96 82 80 96 93 86 92 98 98 96 93 89 93 93 85 95 98 100	GLEHLDDLPGALSELSDLHAHK	CID
QTDLLNFLSSLFDPEAPSLR	20	87	755.076	3	41.43	2262.15	22.8		88 93 96 99 99 98 98 99 98 91 91 86 91 71 73 84 68 69 72 79	QTDLLNFLSSLFDPEAPSLR	CID
C(+57.02)LADR	5	87	317.651	2	5.52	633.29	-4.8	Carbamidomethylation	77 88 82 92 97	C(+57.02)LADR	CID
LAGAAEFQAR	10	87	517.289	2	14.17	1032.54	26.7		91 85 89 95 89 92 82 72 81 96	LAGAAEFQAR	CID
TDGLGLDSLGALR	13	87	644.349	2	21.19	1286.68	0.2		86 93 95 99 98 98 79 84 90 68 51 93 99	TDGLGLDSLGALR	CID
NVVC(+57.02)R	5	87	324.166	2	5.57	646.322	-7.8	Carbamidomethylation	81 88 85 87 95	NVVC(+57.02)R	CID
LATVTKVSQKFPK	13	87	723.941	2	16.18	1445.86	5		57 54 96 97 98 95 89 89 83 83 94 96 99	LATVTKVSQKFPK	CID
AQFVPLPVSVSVEFAVAATDC(+57.02)LAK	24	87	840.454	3	42.04	2518.31	10.3	Carbamidomethylation	76 79 95 98 81 85 61 62 61 67 73 98 99 99 99 99 99 99 98 95 89 91 91 97	AQFVPLPVSVSVEFAVAATDC(+57.02)LAK	CID
HDEKVLTSSAR	11	87	621.842	2	7.39	1241.64	27.4		59 72 94 89 96 98 96 93 84 82 95	HDEKVLTSSAR	CID
QGHEEVELYR	10	87	630.295	2	17.17	1258.59	-14.9		78 67 83 97 95 87 92 86 88 96	QGHEEVELYR	CID
GMTNLNDALLR	11	87	609.32	2	21.48	1216.62	2.5		46 39 97 96 98 92 97 96 97 99 100	GMTNLNDALLR	CID
DSWVDLFR	8	87	519.256	2	28.46	1036.5	0.6		88 82 93 97 95 93 62 85	DSWVDLFR	CID
TLSR	4	87	476.281	1	2.59	475.276	-3.9		78 82 92 96	TLSR	CID
GMGTLLNNALK	11	87	566.322	2	18.65	1130.61	15.7		60 59 90 97 99 97 89 86 85 97 98	GMGTLLNNALK	CID
FSSKVSK	7	87	391.741	2	9.05	781.433	44.2		79 81 68 87 96 98 99	FSSKVSK	CID
LDKQFPK	7	87	438.25	2	10.7	874.491	-5.7		90 93 73 65 91 97 99	LDKQFPK	CID
NYGGTVAVTESGHTC(+57.02)QR	17	87	612.95	3	12	1835.82	2.7	Carbamidomethylation	95 98 95 82 90 97 96 97 97 98 95 82 85 86 77 32 72	NYGGTVAVTESGHTC(+57.02)QR	CID
ELPEKYGLSDC(+57.02)C(+57.02)DK	14	87	571.925	3	14.74	1712.74	8.3	Carbamidomethylation	52 50 86 95 91 95 85 94 93 95 94 92 93 99	ELPEKYGLSDC(+57.02)C(+57.02)DK	CID
KNC(+57.02)DQFELKGEYGFQNELLVR	21	87	863.085	3	27.54	2586.25	-7.5	Carbamidomethylation	93 89 97 98 95 97 98 77 28 18 98 98 96 96 89 82 92 92 95 96 99	KNC(+57.02)DQFELKGEYGFQNELLVR	CID
SSSPFASK	8	87	405.706	2	4.58	809.392	6.8		68 69 91 79 95 96 97 99	SSSPFASK	CID
VLTMEGK	7	87	389.206	2	6.68	776.41	-16.9		92 95 91 67 92 77 94	VLTMEGK	CID
LGQYTSPVAKR	11	87	610.345	2	12.13	1218.67	2.3		95 89 97 99 97 95 52 56 85 92 98	LGQYTSPVAKR	CID
LLLFSPWVR	9	87	565.85	2	28.96	1129.66	17.9		89 99 100 99 98 80 56 67 93	LLLFSPWVR	CID
FKDTSAYVYR	10	87	625.318	2	14.23	1248.61	6.7		88 91 98 91 82 80 86 81 85 95	FKDTSAYVYR	CID
VDSLQKFGER	10	87	589.789	2	17.19	1177.61	-39		41 57 95 99 96 96 99 95 99 100	VDSLQKFGER	CID
AWDAAR	6	87	345.189	2	12.4	688.329	50		81 88 93 73 92 98	AWDAAR	CID
LDPVNPMC(+57.02)LYR	11	87	689.344	2	25.85	1376.66	11.2	Carbamidomethylation	54 63 96 99 98 92 84 92 92 92 99	LDPVNPMC(+57.02)LYR	CID
LSKKFPK	7	87	424.253	2	9.58	846.533	-48.1		93 93 87 84 95 75 86	LSKKFPK	CID
ATGWNLPMGLLYSK	14	87	775.916	2	32.34	1549.8	13.6		85 86 88 93 95 99 94 60 63 81 95 91 95 98	ATGWNLPMGLLYSK	CID
SLMENFVAFVDKC(+57.02)C(+57.02)AADDKEAC(+57.02)FAVEGPK	29	87	827.888	4	30.2	3307.47	16.8	Carbamidomethylation	46 65 96 100 98 99 99 98 96 95 97 95 92 90 89 89 93 92 88 94 89 89 86 86 88 94 35 56 96	SLMENFVAFVDKC(+57.02)C(+57.02)AADDKEAC(+57.02)FAVEGPK	CID
TSRSAQR	7	87	403.216	2	2.65	804.42	-4.1		87 89 82 78 82 94 98	TSRSAQR	CID
EEPTDYDEGQDDPR	14	87	833.35	2	19.09	1664.64	24.6		49 56 84 98 100 99 99 98 82 82 93 94 86 99	EEPTDYDEGQDDPR	CID
MSLGSFLYEYSR	12	87	726.871	2	30.54	1451.68	35.9		38 80 98 92 96 93 94 91 95 88 87 93	MSLGSFLYEYSR	CID
KMLHSLPK	8	87	477.299	2	11.91	952.553	31.9		90 55 98 92 93 97 71 99	KMLHSLPK	CID
HLVDEPQNLLKQNC(+57.02)DQFEKLGEYGFQNALLVR	32	87	954.754	4	31.3	3814.91	20.6	Carbamidomethylation	99 100 100 100 100 70 65 68 87 99 99 96 95 49 57 44 56 98 91 95 96 99 97 92 95 90 86 89 94 96 92 90	HLVDEPQNLLKQNC(+57.02)DQFEKLGEYGFQNALLVR	CID
KNPGVELLKHKPK	13	87	744.46	2	25.65	1486.9	4		89 91 54 34 97 99 98 99 96 91 96 97 90	KNPGVELLKHKPK	CID
MDSLQKFGER	10	87	605.783	2	17.25	1209.58	-24.2		55 89 89 94 89 91 95 76 94 98	MDSLQKFGER	CID
TVLSELSDTLSHR	13	87	729.405	2	30.38	1456.75	30.3		49 66 98 98 99 99 96 97 83 90 92 65 98	TVLSELSDTLSHR	CID
RESASLQKFWR	11	87	704.387	2	15.07	1406.74	12.4		90 95 89 92 95 95 88 88 59 67 98	RESASLQKFWR	CID
KKSPQKKFFKFKFKFEK	17	87	740.789	3	23.46	2219.3	20.6		92 92 38 26 89 95 96 97 97 97 95 93 95 96 90 90 98	KKSPQKKFFKFKFKFEK	CID
MDKAGAGYSSDKLR	14	87	500.25	3	9	1497.72	2.4		82 95 95 89 78 89 74 97 96 90 92 79 80 90	MDKAGAGYSSDKLR	CID
KVEQVSTPTLVEVSR	15	87	836.481	2	21.1	1670.92	16.3		88 91 88 79 86 90 93 84 86 93 84 90 83 85 94	KVEQVSTPTLVEVSR	CID
ALFYLKENK	9	87	563.322	2	16.37	1124.62	5		92 95 99 99 97 75 81 59 92	ALFYLKENK	CID
LDNQEPGGQLAPK	13	87	683.858	2	12.41	1365.69	9.9		72 85 92 95 99 94 78 70 82 86 95 94 98	LDNQEPGGQLAPK	CID
KDGQFSVLFTK	11	87	635.328	2	23.98	1268.68	-28		85 90 82 82 90 88 89 94 88 86 89	KDGQFSVLFTK	CID
NHAHYDLR	8	87	513.212	2	12.89	1024.48	-73.2		71 67 86 89 94 97 98 99	NHAHYDLR	CID
TVMENFVAFVDKC(+57.02)C(+57.02)AWDKEAC(+57.02)FAVEGPK	28	87	827.889	4	29.54	3307.48	13.3	Carbamidomethylation	92 93 96 99 94 94 96 98 97 96 98 96 88 79 79 82 86 82 94 90 87 86 84 85 93 34 56 96	TVMENFVAFVDKC(+57.02)C(+57.02)AWDKEAC(+57.02)FAVEGPK	CID
GYKHTLDQLDSVKVDAPR	18	87	681.374	3	21.39	2041.06	20.5		30 51 89 94 98 98 97 95 98 99 98 96 96 95 84 78 87 98	GYKHTLDQLDSVKVDAPR	CID
KEPLKVSK	8	87	464.765	2	6.84	927.575	-64.6		83 91 84 90 86 95 79 91	KEPLKVSK	CID
C(+57.02)C(+57.02)TKPESERMQETEDYLSLLLNR	23	87	958.13	3	29.01	2871.32	17.2	Carbamidomethylation	99 99 99 99 98 99 97 95 68 37 40 54 94 99 98 97 98 91 94 96 85 80 96	C(+57.02)C(+57.02)TKPESERMQETEDYLSLLLNR	CID
VAPLGEERYLGAR	13	87	477.586	3	17.12	1429.77	-23		96 97 99 99 90 96 94 94 76 46 65 86 99	VAPLGEERYLGAR	CID
VLSAADKRNK	10	87	551.321	2	6.38	1100.63	-3.2		95 97 98 98 91 94 71 60 78 92	VLSAADKRNK	CID
SKDLLFRDDTKC(+57.02)LALSAK	18	87	694.381	3	21.54	2080.1	11.2	Carbamidomethylation	91 92 98 97 98 89 90 89 95 96 96 86 85 73 71 46 78 96	SKDLLFRDDTKC(+57.02)LALSAK	CID
AEDKGAC(+57.02)LLPK	11	87	601.321	2	13.8	1200.62	8.9	Carbamidomethylation	84 94 95 93 90 92 56 63 92 99 100	AEDKGAC(+57.02)LLPK	CID
ALWTGALTPGR	11	87	571.825	2	22.72	1141.62	9.4		46 59 94 97 94 97 98 98 89 85 99	ALWTGALTPGR	CID
VAPLWERYLGAR	12	87	477.587	3	17.16	1429.78	-31.4		95 97 99 99 92 94 91 71 49 71 89 99	VAPLWERYLGAR	CID
FFKRHQFKKFFKFKEK	16	87	444.872	5	23.13	2219.25	31.7		96 96 96 77 27 80 92 91 95 96 93 94 92 89 83 94	FFKRHQFKKFFKFKEK	CID
WFLGSFLYHGANR	13	87	784.39	2	30.95	1566.77	-5.2		87 97 99 99 99 99 99 98 89 68 39 60 98	WFLGSFLYHGANR	CID
DPALVELLKHKPK	13	87	496.639	3	25.03	1486.89	5.3		73 54 95 99 97 98 97 99 95 81 89 87 68	DPALVELLKHKPK	CID
MATVTVPR	8	87	437.752	2	16.17	873.474	17.4		60 88 86 88 85 95 95 99	MATVTVPR	CID
C(+57.02)C(+57.02)TKPESERMPC(+57.02)TEDYLSLLLNR	23	87	958.131	3	28.96	2871.3	24	Carbamidomethylation	99 98 99 99 98 99 92 95 80 37 34 39 94 98 98 97 97 90 93 97 86 81 98	C(+57.02)C(+57.02)TKPESERMPC(+57.02)TEDYLSLLLNR	CID
LQPDPNTLC(+57.02)DEFKADEKK	18	87	537.774	4	18.35	2147.02	22.3	Carbamidomethylation	92 90 83 92 78 83 97 96 93 93 94 79 80 70 76 89 85 93	LQPDPNTLC(+57.02)DEFKADEKK	CID
VVTGVANALAHRGDK	15	87	754.418	2	16.88	1506.83	-3.3		97 97 99 96 98 98 98 97 98 97 91 95 20 49 75	VVTGVANALAHRGDK	CID
C(+57.02)PLLAEKQYGFC(+57.02)K	13	87	807.39	2	22.75	1612.77	-5.4	Carbamidomethylation	38 30 92 99 99 99 92 91 98 95 98 98 99	C(+57.02)PLLAEKQYGFC(+57.02)K	CID
VLSPAGPEAQLYLR	14	86	757.407	2	23.24	1512.83	-20.5		51 65 98 97 98 98 95 98 95 86 88 50 96 99	VLSPAGPEAQLYLR	CID
LEGEDQFLEVAEAPEATQATFPVHR	25	86	928.794	3	28.15	2783.34	6.9		86 92 85 93 92 93 98 99 99 97 93 96 92 94 98 91 90 88 91 90 82 23 30 79 98	LEGEDQFLEVAEAPEATQATFPVHR	CID
YNQEAKDAFLGSFLYEYSR	19	86	767.701	3	30.14	2300.07	2.6		75 77 76 93 94 61 57 50 96 99 98 98 97 99 96 98 93 92 97	YNQEAKDAFLGSFLYEYSR	CID
GYLAVAVVK	9	86	460.284	2	20.43	918.554	-1		37 60 99 98 97 97 98 97 97	GYLAVAVVK	CID
KVPQVSEPTLVEVDK	15	86	834.474	2	22.8	1666.91	11.6		90 94 89 91 94 93 95 77 82 94 80 90 76 70 83	KVPQVSEPTLVEVDK	CID
QDC(+57.02)DQFEKLGEYGFQNALLVR	21	86	844.078	3	29.53	2529.2	6	Carbamidomethylation	75 85 82 93 90 84 92 60 54 84 97 96 91 91 87 85 89 95 97 96 99	QDC(+57.02)DQFEKLGEYGFQNALLVR	CID
HLVDEPQNLLKQNSMGQFEKLGEYGFQNALLVR	33	86	954.748	4	30.8	3814.95	4.1		99 99 99 100 99 62 62 65 82 99 98 96 95 88 60 66 40 50 98 90 94 95 99 97 93 95 90 85 89 95 96 92 92	HLVDEPQNLLKQNSMGQFEKLGEYGFQNALLVR	CID
MAQAALAAVDYLDKHLPR	18	86	661.667	3	33.83	1982.04	-31.2		40 82 80 86 86 94 96 92 92 96 92 87 87 83 82 94 92 98	MAQAALAAVDYLDKHLPR	CID
GFTVLHEK	8	86	465.739	2	11.79	929.497	-36.8		61 88 70 91 97 94 96 97	GFTVLHEK	CID
NPDELTEFAKTC(+57.02)VADESHAGSSDK	24	86	652.807	4	23.43	2607.14	22.5	Carbamidomethylation	85 92 97 99 99 98 98 94 93 95 96 94 95 96 97 98 95 93 92 69 62 19 37 87	NPDELTEFAKTC(+57.02)VADESHAGSSDK	CID
RHWFQNALLVR	11	86	720.413	2	28.03	1438.79	12.1		88 76 71 77 81 85 91 96 94 94 99	RHWFQNALLVR	CID
VTLSELSDPVELR	13	86	729.398	2	30.08	1456.78	3.1		41 49 98 98 99 98 93 96 85 83 92 94 99	VTLSELSDPVELR	CID
STGTLLNNALK	11	86	566.321	2	18.59	1130.63	-1.4		48 56 96 99 99 97 90 87 85 97 98	STGTLLNNALK	CID
KFVC(+57.02)TAQPK	9	86	539.78	2	2.55	1077.56	-16.6	Carbamidomethylation	96 97 96 94 85 86 52 73 100	KFVC(+57.02)TAQPK	CID
C(+57.02)NGFC(+57.02)KGSVLQK	12	86	699.351	2	18.26	1396.66	19.8	Carbamidomethylation	59 79 46 96 99 99 96 89 84 97 96 100	C(+57.02)NGFC(+57.02)KGSVLQK	CID
KEVELKDC(+57.02)AAEK	12	86	473.903	3	12.63	1418.71	-13.9	Carbamidomethylation	96 98 85 92 93 97 98 93 45 44 97 97	KEVELKDC(+57.02)AAEK	CID
FMETATESLAKYNSESPSKQYSLVK	25	86	946.805	3	22.21	2837.38	5.3		93 83 99 99 99 99 99 93 95 93 93 95 82 82 92 86 34 40 79 79 81 81 88 96 99	FMETATESLAKYNSESPSKQYSLVK	CID
C(+57.02)C(+57.02)QDGLTRLPMAR	13	86	526.585	3	18.54	1576.73	4.5	Carbamidomethylation	98 97 97 97 85 93 85 90 92 70 49 77 94	C(+57.02)C(+57.02)QDGLTRLPMAR	CID
MDKAGAGYSKSDLR	14	86	500.249	3	9.91	1497.72	0.9		82 96 97 97 79 81 72 97 95 73 68 82 91 97	MDKAGAGYSKSDLR	CID
THVTLFGDELC(+57.02)K	12	86	473.903	3	22.42	1418.69	0.4	Carbamidomethylation	65 62 49 88 96 98 98 99 96 94 93 96	THVTLFGDELC(+57.02)K	CID
FFKKHRKFKFFKFKEK	16	86	444.87	5	23.42	2219.29	12.6		95 96 96 91 37 66 90 90 95 91 88 92 90 87 82 95	FFKKHRKFKFFKFKEK	CID
YLC(+57.02)DNQDTLSSKLK	14	86	562.279	3	15.77	1683.81	1.6	Carbamidomethylation	94 96 98 98 95 95 98 96 50 26 79 88 96 98	YLC(+57.02)DNQDTLSSKLK	CID
HLVDEPQNLLKQNC(+57.02)DQFEKLGEYGFQNELLVR	32	86	969.242	4	30	3872.92	6.2	Carbamidomethylation	99 99 99 100 99 65 63 65 82 90 97 96 96 97 98 90 60 86 85 55 26 95 98 90 92 88 87 94 93 94 90 91	HLVDEPQNLLKQNC(+57.02)DQFEKLGEYGFQNELLVR	CID
REGNQVQR	8	86	493.759	2	3	985.505	-1.9		89 91 62 77 90 92 90 99	REGNQVQR	CID
KVPYLDEFQKK	11	86	465.582	3	18.19	1393.76	-26.2		57 46 89 94 97 97 97 90 89 91 99	KVPYLDEFQKK	CID
YDETATESLAKYNSESPSKQYSLVKLTK	28	86	636.928	5	23.23	3179.59	5.6		79 89 98 98 99 99 98 91 92 90 90 90 91 86 94 63 29 68 69 73 82 82 89 89 92 96 97 100	YDETATESLAKYNSESPSKQYSLVKLTK	CID
FLGDGVDFNQLSSR	14	86	518.927	3	19.3	1553.75	6.8		98 99 93 96 77 88 91 39 51 90 96 96 95 98	FLGDGVDFNQLSSR	CID
QQFLLNLVK	9	86	551.835	2	27.02	1101.65	0.5		79 86 97 97 96 54 79 91 96	QQFLLNLVK	CID
AYEPFK	6	86	377.683	2	20.62	753.37	-23.1		79 85 90 85 84 93	AYEPFK	CID
STTNLNDALLR	11	86	609.32	2	21.53	1216.64	-13		37 44 96 96 98 90 96 96 97 99 100	STTNLNDALLR	CID
QPC(+57.02)NEFEKLGEYGFKNALLVR	21	86	838.073	3	30.59	2511.26	-23.6	Carbamidomethylation	76 32 49 75 90 96 98 67 79 95 99 98 96 96 90 86 89 99 98 98 99	QPC(+57.02)NEFEKLGEYGFKNALLVR	CID
KVPQVSTPVPVEVSR	15	86	541.315	3	20.99	1620.92	2.1		94 95 83 85 97 97 97 84 40 38 97 99 93 92 97	KVPQVSTPVPVEVSR	CID
LSLSETYDLKSVLGDVGLTEVFSDRADLSGLTK	33	86	882.969	4	36.7	3527.82	5.9		98 98 100 99 100 99 79 83 99 98 98 99 99 95 99 99 91 97 95 93 85 77 29 37 63 41 81 85 80 63 86 94 99	LSLSETYDLKSVLGDVGLTEVFSDRADLSGLTK	CID
KLNDYVEKGSHGKLVELVK	19	86	539.807	4	17.8	2155.2	-0.9		95 94 87 97 97 97 98 79 54 82 75 84 93 92 89 93 65 66 96	KLNDYVEKGSHGKLVELVK	CID
SRC(+57.02)LKPQYK	9	86	590.314	2	13.69	1178.62	-7.5	Carbamidomethylation	73 87 93 95 87 66 81 92 98	SRC(+57.02)LKPQYK	CID
ESPC(+57.02)VK	6	86	360.171	2	5.93	718.332	-5.3	Carbamidomethylation	92 87 83 80 81 90	ESPC(+57.02)VK	CID
LVSPASSAGC(+57.02)APGSPR	16	86	757.407	2	23.3	1512.74	42	Carbamidomethylation	55 49 97 95 93 89 92 91 84 94 93 90 81 89 86 97	LVSPASSAGC(+57.02)APGSPR	CID
LSLSFDYDLK	10	86	600.802	2	19.96	1199.61	-15.1		93 92 92 79 69 82 79 84 91 97	LSLSFDYDLK	CID
LSDSNPR	7	86	394.714	2	9.94	787.382	38.5		92 93 97 54 82 85 97	LSDSNPR	CID
YDETATESALK	11	86	614.299	2	17.26	1226.57	14.5		79 90 97 94 92 82 90 83 72 79 86	YDETATESALK	CID
FSALTDPETYVKPAFDEK	18	86	686.674	3	24.73	2057	0.8		90 92 98 99 98 93 60 92 90 94 95 86 75 87 57 57 90 90	FSALTDPETYVKPAFDEK	CID
C(+57.02)C(+57.02)TKPESERMQEAEDYLSLLLNR	23	86	948.11	3	30.56	2841.31	-0.6	Carbamidomethylation	99 99 99 99 98 99 92 94 60 30 35 49 85 97 98 97 97 96 97 96 82 77 98	C(+57.02)C(+57.02)TKPESERMQEAEDYLSLLLNR	CID
NVTHQSELAHR	11	86	646.292	2	2.46	1290.64	-56.6		74 67 89 90 82 85 93 93 91 91 99	NVTHQSELAHR	CID
ETMAKTLVLTSSAR	14	86	503.27	3	13.91	1506.81	-13.5		93 86 55 73 72 79 90 98 99 96 95 91 90 96	ETMAKTLVLTSSAR	CID
DPMVSAR	7	86	388.192	2	6.36	774.369	0.5		95 88 70 85 86 87 97	DPMVSAR	CID
RFGPTFR	7	86	440.743	2	13.41	879.471	-0.2		80 74 67 89 98 98 99	RFGPTFR	CID
SRLQKALGWDVR	12	86	714.903	2	18.44	1427.8	-6.1		55 69 96 95 97 98 98 78 70 86 96 99	SRLQKALGWDVR	CID
LSQGNFPK	8	86	445.758	2	13.7	889.466	40.7		92 95 88 68 59 95 97 98	LSQGNFPK	CID
FFKKFKFEGEEKK	13	86	846.505	2	19.73	1690.91	51.7		85 89 95 97 95 86 82 82 52 87 86 91 95	FFKKFKFEGEEKK	CID
KYASLANSHLPK	12	86	664.873	2	14.86	1327.72	5.5		96 99 98 96 91 81 31 52 93 99 100 100	KYASLANSHLPK	CID
LSAADKGNVKAAEGGK	16	86	505.948	3	14.76	1514.81	12		98 97 97 94 96 94 80 85 91 93 92 91 88 67 37 81	LSAADKGNVKAAEGGK	CID
SAQSAEEKAAVTSLFAK	17	86	869.474	2	32.69	1736.89	22.8		34 37 44 90 96 99 99 95 95 98 98 96 96 97 96 98 99	SAQSAEEKAAVTSLFAK	CID
LSEAC(+57.02)NLPLVGAGPC(+57.02)R	16	86	857.436	2	21.58	1712.83	14.3	Carbamidomethylation	50 46 82 97 99 99 99 83 90 99 86 92 92 79 88 100	LSEAC(+57.02)NLPLVGAGPC(+57.02)R	CID
RGTHQSELAHR	11	86	646.294	2	2.51	1290.65	-62.1		85 55 87 90 82 85 93 90 89 93 99	RGTHQSELAHR	CID
KSHKKTALVELLK	13	86	747.975	2	25.05	1493.93	4.7		85 39 21 92 97 98 97 98 98 98 98 100 100	KSHKKTALVELLK	CID
ALKAWADAR	9	86	501.3	2	48.83	1000.55	40.9		86 93 92 95 92 45 89 87 96	ALKAWADAR	CID
RLC(+57.02)ASLQKFWRAKLAWSVAR	20	86	816.465	3	22.82	2446.35	8.4	Carbamidomethylation	96 97 99 98 95 95 67 68 96 94 97 96 41 48 92 84 84 86 90 99	RLC(+57.02)ASLQKFWRAKLAWSVAR	CID
KVPQVSTPTLVEVSRSLGKVASR	23	86	813.486	3	25.16	2437.4	14.5		96 99 99 98 100 99 99 97 95 96 95 97 89 76 79 81 88 70 83 79 32 35 97	KVPQVSTPTLVEVSRSLGKVASR	CID
MLESVPR	7	86	416.226	2	20.2	830.432	6.3		65 90 92 79 86 92 98	MLESVPR	CID
FNQLDSVKVSVPR	13	86	744.913	2	24.06	1487.81	1.7		76 79 77 84 91 87 90 93 93 86 84 83 93	FNQLDSVKVSVPR	CID
LVNELTEFAKTC(+57.02)VADESNEDVPK	23	86	652.811	4	23.69	2607.24	-8.7	Carbamidomethylation	95 92 96 99 97 95 95 82 82 87 90 88 88 91 92 94 85 74 84 52 82 43 93	LVNELTEFAKTC(+57.02)VADESNEDVPK	CID
EAFVEVTQLVTDLTKVHK	18	86	686.401	3	30.68	2056.12	29.8		63 51 97 97 98 93 92 86 95 97 90 86 83 75 77 80 86 96	EAFVEVTQLVTDLTKVHK	CID
DAPEKVTK	8	86	444.263	2	4.35	886.476	40.3		79 67 70 95 94 96 96 98	DAPEKVTK	CID
ARPYLDEFQKK	11	86	697.876	2	17.92	1393.74	1.6		74 86 85 91 94 95 96 90 73 78 93	ARPYLDEFQKK	CID
ERVLTSSAR	9	86	509.78	2	10.27	1017.56	-10.8		89 90 96 96 93 89 79 61 85	ERVLTSSAR	CID
SYLSMVGSC(+57.02)C(+57.02)TSPNPTVC(+57.02)FLKER	23	86	898.43	3	26.46	2692.21	21.1	Carbamidomethylation	52 57 99 99 98 99 98 99 96 91 93 96 87 88 75 82 83 82 78 82 71 86 94	SYLSMVGSC(+57.02)C(+57.02)TSPNPTVC(+57.02)FLKER	CID
AHLAFQPTVAQQKR	14	86	532.313	3	12.54	1593.87	26.4		95 93 99 97 94 90 92 94 89 78 63 63 70 90	AHLAFQPTVAQQKR	CID
QMLHEKTPVSEKVTK	15	86	439.492	4	14.77	1753.94	-0.5		80 67 96 70 82 90 93 90 93 90 88 77 88 94 96	QMLHEKTPVSEKVTK	CID
HSQKKTALVELLK	13	86	747.977	2	24.59	1493.89	31.2		32 44 85 96 96 96 94 96 95 96 96 99 99	HSQKKTALVELLK	CID
NLKADASVAR	10	86	522.804	2	21.13	1043.57	19.7		77 89 92 97 90 73 86 79 83 95	NLKADASVAR	CID
HYPLR	5	86	343.171	2	6.41	684.371	-61.8		86 95 56 97 96	HYPLR	CID
MQNLSPR	7	86	423.237	2	5.54	844.423	44.7		63 86 92 92 88 85 96	MQNLSPR	CID
QYFLLEPEK	9	86	583.818	2	16.53	1165.6	17.5		77 79 78 95 92 91 74 96 92	QYFLLEPEK	CID
GNKFLR	6	86	367.715	2	8.05	733.423	-12		68 80 80 92 97 98	GNKFLR	CID
LSKASC(+57.02)PK	8	86	445.758	2	12.98	889.469	36.4	Carbamidomethylation	94 95 84 71 82 72 93 97	LSKASC(+57.02)PK	CID
VMSYLC(+57.02)SQQDLLSR	14	86	850.427	2	21.81	1698.81	18.7	Carbamidomethylation	44 22 65 98 100 100 97 95 95 97 98 97 96 99	VMSYLC(+57.02)SQQDLLSR	CID
YVLDWR	6	86	426.225	2	12.58	850.434	1.2		87 90 90 72 82 94	YVLDWR	CID
SAADKRNK	8	86	445.241	2	6.23	888.478	-11.6		91 93 97 93 79 81 59 92	SAADKRNK	CID
NVNFQK	6	86	375.197	2	7.91	748.387	-9.2		85 91 83 79 82 95	NVNFQK	CID
QTDLLNFLSYALDPK	15	85	869.466	2	44.04	1736.9	11.5		34 40 65 96 99 98 99 99 98 92 83 95 95 95 98	QTDLLNFLSYALDPK	CID
VLYGSAR	7	85	383.207	2	6.62	764.418	-23.6		87 92 80 65 89 91 95	VLYGSAR	CID
SSKLNNQK	8	85	459.763	2	9.8	917.493	20.1		82 81 77 91 85 85 86 97	SSKLNNQK	CID
TEGSTTTHAR	10	85	530.766	2	4.3	1059.49	21.8		86 95 92 92 89 88 88 72 57 97	TEGSTTTHAR	CID
RFENPVFFR	9	85	606.312	2	17.85	1210.62	-12		88 82 83 70 60 93 97 97 99	RFENPVFFR	CID
QDAFNVEK	8	85	475.732	2	4.04	949.451	-1.8		78 95 91 82 60 88 95 96	QDAFNVEK	CID
MTLLASPVRAEGMR	14	85	511.265	3	16.86	1530.8	-18.5		79 95 96 97 96 95 87 85 89 81 90 69 43 95	MTLLASPVRAEGMR	CID
NPTLC(+57.02)DEFKADEKKFWGK	18	85	554.023	4	23.27	2212.06	0.3	Carbamidomethylation	86 88 97 98 90 91 97 90 86 82 88 89 50 65 85 82 77 97	NPTLC(+57.02)DEFKADEKKFWGK	CID
DTHKMELAHR	10	85	619.299	2	3.25	1236.6	-15.4		90 88 81 94 65 94 91 78 74 98	DTHKMELAHR	CID
ANQSLPR	7	85	393.209	2	13.96	784.419	-19.3		77 79 82 83 90 90 97	ANQSLPR	CID
AGTDLLNFLSSFLDPKNAPSR	21	85	755.077	3	41.48	2262.16	19.6		89 81 96 99 99 100 98 98 99 96 91 85 89 92 72 71 51 79 56 79 73	AGTDLLNFLSSFLDPKNAPSR	CID
KHRFKQFFKKFFKFEK	16	85	740.782	3	23.59	2219.25	32.6		92 35 52 93 94 90 93 92 94 94 87 88 90 86 90 97	KHRFKQFFKKFFKFEK	CID
GPNHAGAVTLK	11	85	532.801	2	5.15	1063.58	9.8		81 86 92 93 98 68 85 80 71 93 90	GPNHAGAVTLK	CID
GNQTALVELLK	11	85	593.365	2	25.62	1184.68	33.6		23 41 93 96 96 97 96 99 99 100 100	GNQTALVELLK	CID
LEKFEDLDAEHFK	13	85	540.962	3	13.79	1619.78	50.4		79 93 89 82 89 89 83 84 66 88 81 90 94	LEKFEDLDAEHFK	CID
WFYLGSSMR	9	85	573.791	2	28.61	1145.53	31.1		84 94 91 97 89 87 55 73 97	WFYLGSSMR	CID
LTMPAR	6	85	344.7	2	7.8	687.374	17.6		95 95 55 78 91 98	LTMPAR	CID
NALFC(+57.02)LDSAWKSAK	14	85	805.907	2	25.45	1609.79	4.5	Carbamidomethylation	54 60 97 99 98 98 95 86 85 82 88 89 88 76	NALFC(+57.02)LDSAWKSAK	CID
WFLGFSLYEYSR	12	85	784.381	2	57.26	1566.75	-1.5		73 93 98 93 84 73 88 88 88 75 75 94	WFLGFSLYEYSR	CID
SAGKEC(+57.02)VPNSNER	13	85	724.337	2	7.17	1446.65	5.3	Carbamidomethylation	45 51 76 93 99 99 98 86 86 91 87 96 99	SAGKEC(+57.02)VPNSNER	CID
LEGYGFQNALLVR	13	85	740.404	2	54.55	1478.79	3.2		86 92 68 96 91 97 86 86 87 72 90 59 96	LEGYGFQNALLVR	CID
FNAAPK	6	85	324.195	2	10.23	646.344	47.8		78 57 82 95 99 99	FNAAPK	CID
HPYFYAPELLYYANK	15	85	944.975	2	28.89	1887.92	8.5		90 57 60 62 96 98 88 94 98 99 95 92 86 82 77	HPYFYAPELLYYANK	CID
C(+57.02)APHAC(+57.02)YSTVFDKLK	15	85	599.616	3	22.38	1795.84	-7.3	Carbamidomethylation	34 38 88 90 93 90 89 89 90 94 95 96 93 98 99	C(+57.02)APHAC(+57.02)YSTVFDKLK	CID
KVQEVSTPTLVEVSR	15	85	836.471	2	21.3	1670.92	4.1		91 94 76 84 79 86 89 78 83 87 73 85 90 85 95	KVQEVSTPTLVEVSR	CID
QVDLLEGAVTSASK	14	85	709.384	2	24.88	1416.75	4.9		37 46 99 99 99 99 79 87 91 88 88 88 92 98	QVDLLEGAVTSASK	CID
WQVFKTEGSTTTHVK	15	85	583.634	3	8.92	1747.89	-6.2		85 97 93 89 79 85 93 62 81 88 82 84 80 86 89	WQVFKTEGSTTTHVK	CID
DDPHAC(+57.02)YSTVFDKLK	15	85	599.283	3	20.85	1794.82	1.2	Carbamidomethylation	66 61 57 60 91 95 97 97 98 98 94 91 82 91 95	DDPHAC(+57.02)YSTVFDKLK	CID
SALTPDETYVPK	12	85	660.84	2	17.86	1319.66	3.2		40 46 96 98 93 95 95 88 82 90 97 99	SALTPDETYVPK	CID
VLGLSAR	7	85	358.207	2	6.71	714.439	-56.2		89 93 73 66 86 90 98	VLGLSAR	CID
TYFPHFDLSHGSAQVKGHGAK	21	85	457.631	5	19.38	2283.12	0.1		96 97 97 96 93 90 92 95 97 95 87 89 87 79 85 71 44 60 69 82 80	TYFPHFDLSHGSAQVKGHGAK	CID
LVTDLTKVHKEC(+57.02)C(+57.02)HDGLLEC(+57.02)ADDNLDLAK	29	85	677.331	5	19.66	3381.6	5.3	Carbamidomethylation	99 98 99 99 99 96 95 96 90 90 95 60 61 86 72 23 92 94 96 90 85 88 84 44 55 82 94 99 100	LVTDLTKVHKEC(+57.02)C(+57.02)HDGLLEC(+57.02)ADDNLDLAK	CID
QLDSVQVGEPR	11	85	614.346	2	18.55	1226.63	43.2		75 94 98 92 90 72 85 59 77 92 99	QLDSVQVGEPR	CID
YLDQLLQSYQAGK	13	85	763.899	2	21.33	1525.78	4.5		81 90 98 96 99 99 96 92 93 84 72 20 83	YLDQLLQSYQAGK	CID
HLVDEPQNLLKQNSGMQFEKLGEYGFQNALLVR	33	85	954.742	4	30.86	3814.95	-1.4		99 100 100 100 100 63 61 63 82 99 98 96 95 87 28 18 56 65 97 88 92 89 98 96 91 94 89 88 90 95 97 94 90	HLVDEPQNLLKQNSGMQFEKLGEYGFQNALLVR	CID
LLDEAGAC(+57.02)AAPK	12	85	405.878	3	16.59	1214.6	12	Carbamidomethylation	96 96 92 95 92 70 93 90 62 57 80 92	LLDEAGAC(+57.02)AAPK	CID
EYC(+57.02)DNQDTLSSK	12	85	730.322	2	11.7	1458.59	24.2	Carbamidomethylation	56 46 94 94 87 82 93 91 92 91 93 96	EYC(+57.02)DNQDTLSSK	CID
KVNKVSTSQTVEVSR	15	85	831.475	2	21.38	1660.91	14.8		90 95 86 88 90 90 80 72 73 76 74 94 89 91 98	KVNKVSTSQTVEVSR	CID
AWWAR	5	85	345.186	2	12.31	688.345	19		85 89 65 93 98	AWWAR	CID
ALQAMASVAR	10	85	509.295	2	15.6	1016.54	32.1		90 95 90 97 63 51 92 86 94 99	ALQAMASVAR	CID
HFSLLTLC(+57.02)LTK	11	85	666.864	2	28.64	1331.73	-10.7	Carbamidomethylation	82 92 93 95 98 89 89 62 74 83 86	HFSLLTLC(+57.02)LTK	CID
WEFC(+57.02)NLKK	8	85	562.784	2	18.03	1123.55	4.2	Carbamidomethylation	81 96 88 84 76 84 81 95	WEFC(+57.02)NLKK	CID
ALKAWSAVR	9	85	501.3	2	51.86	1000.58	3.9		91 94 94 97 94 91 61 51 97	ALKAWSAVR	CID
MTAGKFPK	8	85	440.248	2	10.44	878.468	13.8		75 89 89 70 86 90 90 96	MTAGKFPK	CID
MAGPLR	6	85	322.692	2	8.97	643.347	34.2		69 86 70 89 99 100	MAGPLR	CID
FFKKHREKFFKKFFQK	16	85	555.843	4	64.45	2219.25	40.8		93 94 95 93 45 57 92 95 95 96 95 96 84 78 59 97	FFKKHREKFFKKFFQK	CID
ALGAAEFQAR	10	85	517.295	2	14.41	1032.54	38.8		86 95 91 95 90 86 70 62 79 99	ALGAAEFQAR	CID
KDFEYAVSVLLRLAK	15	85	584.684	3	26.25	1751	18.6		77 45 24 86 93 97 98 98 98 99 90 86 94 95 98	KDFEYAVSVLLRLAK	CID
MATEPNQHLC(+57.02)AVMGK	15	85	843.93	2	22.22	1685.77	45.8	Carbamidomethylation	39 79 75 94 82 85 85 85 97 90 86 95 90 96 99	MATEPNQHLC(+57.02)AVMGK	CID
DLVDPTKC(+57.02)NLLAEKQYGGSYK	21	85	800.405	3	22.17	2398.18	4.2	Carbamidomethylation	89 90 97 99 87 86 89 66 65 98 100 99 99 93 89 90 77 33 51 92 99	DLVDPTKC(+57.02)NLLAEKQYGGSYK	CID
TSRGTQR	7	85	403.216	2	2.69	804.42	-2.8		92 92 87 55 77 94 99	TSRGTQR	CID
EAFVEVKTLKMTYR	14	85	857.979	2	31.94	1713.91	18.5		94 92 97 98 99 95 83 82 86 72 43 77 80 92	EAFVEVKTLKMTYR	CID
TTQAALAAVDYLNKHLPR	18	85	661.339	3	33.42	1981.07	-40.2		37 45 86 94 95 96 96 96 95 97 90 86 75 78 82 95 93 98	TTQAALAAVDYLNKHLPR	CID
DTHKSELAHGVFK	13	85	490.261	3	7.51	1467.75	9.8		88 85 91 94 91 96 95 97 92 56 78 63 81	DTHKSELAHGVFK	CID
DPVADYGKDLVEKAK	15	85	549.959	3	21.95	1646.85	1.8		62 44 95 97 99 93 74 77 90 96 93 90 79 89 96	DPVADYGKDLVEKAK	CID
KVPQVVAPTLVEVSR	15	85	541.317	3	21.36	1620.96	-17.7		90 95 86 86 95 37 32 79 95 99 97 98 95 93 97	KVPQVVAPTLVEVSR	CID
GQQLNWR	7	85	451.238	2	13.51	900.457	4.2		71 81 86 94 85 81 97	GQQLNWR	CID
RHPEYAVKFHR	11	85	720.418	2	54.24	1438.76	44.4		93 92 92 98 96 88 90 46 66 76 97	RHPEYAVKFHR	CID
VLSAADQKAAKAAEGGK	17	85	538.972	3	14.81	1613.87	13.7		98 98 98 97 91 94 86 82 46 46 92 91 90 85 67 84 95	VLSAADQKAAKAAEGGK	CID
GAPLQK	6	85	307.185	2	5.8	612.36	-5.5		71 79 72 96 94 97	GAPLQK	CID
LPENVVVGADR	11	85	584.841	2	13.79	1167.62	36.9		99 95 99 96 94 95 90 30 70 82 93	LPENVVVGADR	CID
FKKFFKKFKFK	11	85	381.486	4	19.09	1521.92	-4.5		91 90 88 90 86 78 87 82 78 79 94	FKKFFKKFKFK	CID
QTALVELLKHQPKATEEQLK	20	85	576.842	4	20.01	2303.28	23.8		79 89 96 96 96 97 95 94 84 76 80 72 65 76 76 88 90 77 90 96	QTALVELLKHQPKATEEQLK	CID
EESSPDSAEDVR	12	85	660.759	2	10.86	1319.55	-33.1		48 50 83 95 93 96 93 93 93 91 93 99	EESSPDSAEDVR	CID
QFC(+57.02)DDQDTLSSK	12	85	722.33	2	11.66	1442.6	32.6	Carbamidomethylation	76 83 94 97 95 85 91 89 91 89 56 81	QFC(+57.02)DDQDTLSSK	CID
VPMMNR	6	85	374.182	2	10.68	746.357	-9.5		93 86 72 74 90 97	VPMMNR	CID
DLPQAQR	7	85	414.221	2	7.17	826.43	-2.7		88 76 79 89 88 84 94	DLPQAQR	CID
QPLKVSK	7	85	400.253	2	7.82	798.496	-4.8		78 81 90 82 87 90 92	QPLKVSK	CID
TSTNLNDALLR	11	85	609.326	2	21.23	1216.64	-3.6		35 43 96 95 97 91 96 95 96 99 99	TSTNLNDALLR	CID
MLSAEEKAAVVMAFAK	16	85	565.977	3	24.94	1694.87	21.8		86 97 98 95 96 96 94 95 97 95 80 24 55 77 85 98	MLSAEEKAAVVMAFAK	CID
AMTGGLRQC(+57.02)STSK	13	85	698.845	2	7.74	1395.66	11.5	Carbamidomethylation	88 78 97 85 80 94 70 45 87 93 97 99 100	AMTGGLRQC(+57.02)STSK	CID
HLVDEPQNLLQQNSGMQFEKLGEYGFQNALLVR	33	85	954.756	4	30.62	3814.91	22.6		98 99 99 100 100 66 63 67 83 99 97 96 95 89 32 21 62 71 98 88 91 93 99 96 91 94 89 84 88 94 96 92 90	HLVDEPQNLLQQNSGMQFEKLGEYGFQNALLVR	CID
LLDEAGAEGKR	11	85	579.807	2	18.41	1157.6	-4.1		94 95 92 98 97 79 95 96 51 70 72	LLDEAGAEGKR	CID
VPAYTPFK	8	85	461.73	2	20.29	921.496	-54.5		85 81 89 90 87 81 79 91	VPAYTPFK	CID
TKVADAKNYLEK	12	85	690.369	2	13.55	1378.75	-16		85 86 97 97 96 89 86 85 43 72 96 93	TKVADAKNYLEK	CID
LVTDLTKVHKEC(+57.02)C(+57.02)HDGLLEC(+57.02)ADDRADLAK	29	85	677.337	5	19.42	3381.61	10.7	Carbamidomethylation	99 98 99 99 99 97 96 96 93 92 95 56 56 85 57 25 92 92 95 86 81 86 88 79 51 83 97 98 99	LVTDLTKVHKEC(+57.02)C(+57.02)HDGLLEC(+57.02)ADDRADLAK	CID
VEPVNPMC(+57.02)LYR	11	85	689.346	2	25.34	1376.66	13.5	Carbamidomethylation	40 76 90 98 98 90 81 90 89 89 99	VEPVNPMC(+57.02)LYR	CID
TC(+57.02)VADESHAC(+57.02)WKSLHTLFGDELC(+57.02)K	24	85	955.447	3	21.37	2863.27	15.7	Carbamidomethylation	54 59 97 98 97 97 97 98 97 43 33 75 69 95 95 95 95 95 72 92 98 97 98 99	TC(+57.02)VADESHAC(+57.02)WKSLHTLFGDELC(+57.02)K	CID
LVTDLTKVHKEC(+57.02)C(+57.02)HDGLLEC(+57.02)ADDRWLAK	28	85	677.337	5	19.47	3381.63	6.4	Carbamidomethylation	99 98 99 99 98 96 96 97 92 94 93 50 52 79 57 24 89 94 96 86 81 86 85 80 73 93 97 99	LVTDLTKVHKEC(+57.02)C(+57.02)HDGLLEC(+57.02)ADDRWLAK	CID
KFASALPAVSATK	13	85	645.848	2	15.39	1289.73	-40.8		85 88 86 84 80 95 65 44 89 93 97 99 99	KFASALPAVSATK	CID
NVGGFQK	7	85	375.198	2	7.95	748.387	-6.5		90 97 83 75 83 82 82	NVGGFQK	CID
FLYQTAVSLLTPAYLPVFK	19	84	1086.11	2	27.05	2170.21	1.2		40 55 90 91 96 91 93 99 99 99 96 94 90 89 88 63 66 73 98	FLYQTAVSLLTPAYLPVFK	CID
WSAGLVR	7	84	394.714	2	9.58	787.434	-25.8		78 88 84 74 89 85 95	WSAGLVR	CID
MEDGFLTYR	9	84	566.289	2	26.77	1130.51	49.8		77 96 93 77 93 95 93 59 79	MEDGFLTYR	CID
SLDEC(+57.02)C(+57.02)HSESSTAC(+57.02)LNAKGPQLTR	24	84	681.059	4	15.93	2720.2	4.8	Carbamidomethylation	82 89 79 86 93 93 89 91 95 96 91 89 90 92 92 88 91 93 80 35 32 85 85 95	SLDEC(+57.02)C(+57.02)HSESSTAC(+57.02)LNAKGPQLTR	CID
FSALTPPFDTFPK	13	84	734.41	2	21.74	1466.74	41.5		88 90 97 99 99 82 67 55 67 75 90 93 98	FSALTPPFDTFPK	CID
ALQAWDAAR	9	84	501.299	2	47.32	1000.51	74.5		67 90 92 97 91 79 76 74 95	ALQAWDAAR	CID
LFSSVVPQADLALLK	15	84	534.308	3	24.17	1599.92	-13.5		96 91 39 33 74 84 85 94 96 98 93 91 98 99 99	LFSSVVPQADLALLK	CID
LLAR	4	84	472.248	1	17.5	471.317	-162.5		92 85 76 85	LLAR	CID
LLTEHPVDAPR	11	84	624.336	2	19.91	1246.67	-7.9		92 94 90 95 76 74 82 80 68 82 97	LLTEHPVDAPR	CID
EVALNTLLFMGR	12	84	682.376	2	30.63	1362.73	4		52 41 97 97 93 91 94 96 89 80 86 98	EVALNTLLFMGR	CID
TPLVGQPSLRSSGKDTLSSK	20	84	686.717	3	24.13	2057.11	8.4		99 99 100 100 98 97 91 92 94 93 83 38 12 65 88 81 86 86 92 98	TPLVGQPSLRSSGKDTLSSK	CID
EQPNHAVEGDC(+57.02)DLHVLKQDGQFSVLFTK	28	84	803.647	4	26.24	3210.54	5.4	Carbamidomethylation	56 39 21 33 94 96 95 98 55 81 97 98 98 97 99 99 94 91 97 85 89 88 87 88 95 95 98 99	EQPNHAVEGDC(+57.02)DLHVLKQDGQFSVLFTK	CID
SEKEPK	6	84	359.2	2	10.15	716.37	21.6		82 88 68 82 90 97	SEKEPK	CID
DPMREK	6	84	388.19	2	6.77	774.369	-4.8		91 77 75 90 90 84	DPMREK	CID
HLVDEKNTMLK	11	84	664.354	2	18.81	1326.7	-2.9		97 99 99 99 99 90 81 55 18 95 97	HLVDEKNTMLK	CID
RESQEVMFLTLQVK	14	84	854.46	2	29.14	1706.9	1.3		44 70 30 89 99 99 96 99 99 97 97 86 87 91	RESQEVMFLTLQVK	CID
FGTVLHEK	8	84	465.739	2	11.73	929.497	-36.5		71 72 70 89 95 91 94 91	FGTVLHEK	CID
LSQKFFATPR	10	84	597.828	2	18.41	1193.66	-12.1		83 83 87 86 81 74 85 84 84 95	LSQKFFATPR	CID
VAPLGEEFDGLGAR	14	84	477.585	3	17.4	1429.72	9.3		96 98 99 100 91 96 94 88 62 71 40 61 85 97	VAPLGEEFDGLGAR	CID
GFELGSFLYEYSR	13	84	784.381	2	41.44	1566.74	8.2		21 41 93 97 96 95 94 97 95 95 87 85 97	GFELGSFLYEYSR	CID
WFLGSFLYTFMR	12	84	784.385	2	50.18	1566.77	-9.2		82 97 99 97 94 93 95 88 67 70 33 96	WFLGSFLYTFMR	CID
WFLGSFLYEHLR	12	84	784.384	2	48.42	1566.8	-28.2		72 92 97 92 93 91 95 93 92 56 41 95	WFLGSFLYEHLR	CID
C(+57.02)LQDGVGDVSFVR	13	84	726.355	2	21.84	1450.69	5.9	Carbamidomethylation	82 89 96 99 96 98 90 97 94 79 31 45 97	C(+57.02)LQDGVGDVSFVR	CID
RHPEYAVDVLLR	12	84	734.411	2	21.69	1466.8	5.6		97 96 95 98 93 52 50 93 85 66 85 99	RHPEYAVDVLLR	CID
WC(+57.02)ALGHLDGK	10	84	578.771	2	11.34	1155.55	-19.8	Carbamidomethylation	90 97 98 99 93 94 93 76 18 83	WC(+57.02)ALGHLDGK	CID
TSWQNC(+57.02)EVR	9	84	590.283	2	9.92	1178.51	31.9	Carbamidomethylation	81 85 77 79 81 81 91 82 98	TSWQNC(+57.02)EVR	CID
ALPQLSTEELTFLGK	15	84	823.957	2	28.83	1645.89	4.4		44 60 89 87 93 90 90 93 91 88 84 89 93 78 92	ALPQLSTEELTFLGK	CID
VGLNFSPGQSFPASQAHLR	19	84	671.683	3	24.53	2012.02	2.1		82 23 55 90 97 98 85 74 92 96 98 93 90 82 79 85 82 95 99	VGLNFSPGQSFPASQAHLR	CID
DTHKSELAGAHFR	13	84	490.26	3	7.81	1467.72	24.2		94 93 92 94 91 95 97 96 61 76 68 51 82	DTHKSELAGAHFR	CID
RHEPYAVWLLR	11	84	720.414	2	55.5	1438.78	21.3		96 95 65 32 91 92 82 87 90 96 99	RHEPYAVWLLR	CID
QNPEHAVEGDC(+57.02)DLHVLK	17	84	654.31	3	16.87	1959.91	-1.6	Carbamidomethylation	74 29 14 57 85 95 97 99 96 99 98 98 96 93 99 100 100	QNPEHAVEGDC(+57.02)DLHVLK	CID
ASTFPPNVFFR	11	84	641.832	2	17.85	1281.65	-0.6		81 79 86 79 79 59 70 97 97 98 100	ASTFPPNVFFR	CID
VLDTFYFALVGGYLHPNAK	19	84	709.066	3	39.13	2124.1	33.7		91 97 98 88 76 85 94 95 96 93 79 81 90 93 76 62 43 87 73	VLDTFYFALVGGYLHPNAK	CID
SLMENFVAFVDKC(+57.02)C(+57.02)AWDKEAC(+57.02)FAVEGPK	28	84	827.879	4	29.78	3307.48	1.7	Carbamidomethylation	44 62 96 100 98 99 98 98 98 97 98 97 89 79 77 80 91 87 94 90 88 82 81 80 89 21 41 95	SLMENFVAFVDKC(+57.02)C(+57.02)AWDKEAC(+57.02)FAVEGPK	CID
RNEGSVAAPR	10	84	528.788	2	11.74	1055.55	13.6		90 85 93 70 75 62 82 87 96 99	RNEGSVAAPR	CID
LETMAWR	7	84	453.737	2	7.05	905.443	18.1		89 96 97 63 61 85 96	LETMAWR	CID
KDQYLPDEDGKKR	13	84	796.422	2	18.17	1590.8	18.2		68 84 91 98 99 90 92 79 85 37 82 88 97	KDQYLPDEDGKKR	CID
MATVSLPR	8	84	437.753	2	16.51	873.474	19.8		57 83 87 85 82 89 89 98	MATVSLPR	CID
QKVAPLWEREFQR	13	84	562.97	3	16.06	1685.9	-6.8		82 93 96 97 91 93 80 93 88 71 39 73 94	QKVAPLWEREFQR	CID
VAPLGEERFEGAR	13	84	477.584	3	17.45	1429.73	0		95 97 99 98 87 96 94 90 37 44 67 88 99	VAPLGEERFEGAR	CID
STREPK	6	84	359.2	2	10.28	716.382	5.2		79 75 75 83 93 97	STREPK	CID
TDLTK	5	84	577.321	1	13.89	576.312	2.5		71 81 86 88 92	TDLTK	CID
MKEYR	5	84	363.718	2	19.18	725.353	93.2		70 88 85 86 90	MKEYR	CID
TSWQDC(+57.02)EVR	9	84	590.775	2	10.76	1179.5	31.4	Carbamidomethylation	79 82 87 77 82 82 92 85 86	TSWQDC(+57.02)EVR	CID
VLDQYLKMLYPK	12	84	504.281	3	25.62	1509.83	-3.2		95 97 97 93 96 92 88 25 85 86 54 97	VLDQYLKMLYPK	CID
C(+57.02)LVSVLLR	8	84	480.337	2	59.98	958.563	99.6	Carbamidomethylation	63 72 88 86 86 93 93 95	C(+57.02)LVSVLLR	CID
ALKAGEEKR	9	84	501.298	2	52.07	1000.57	15.6		81 89 86 94 67 87 88 74 95	ALKAGEEKR	CID
VLNELTEFAKTC(+57.02)VADESHAGC(+57.02)EK	23	84	652.812	4	23.65	2607.19	9.9	Carbamidomethylation	43 54 94 98 99 97 97 86 85 90 92 90 90 93 93 94 85 77 85 60 72 88 84	VLNELTEFAKTC(+57.02)VADESHAGC(+57.02)EK	CID
KHMEK	5	84	336.68	2	1.88	671.342	5.2		85 83 73 89 92	KHMEK	CID
NAFPDATETDLQELVAKR	18	84	673.363	3	23.99	2017.01	27.8		31 39 96 96 97 65 56 97 95 98 99 91 96 95 93 90 88 98	NAFPDATETDLQELVAKR	CID
VVNPTAK	7	84	364.698	2	10.32	727.423	-56.1		85 92 96 95 96 60 66	VVNPTAK	CID
NSLVAVPR	8	84	428.252	2	19.57	854.497	-8.3		51 81 90 88 90 88 89 97	NSLVAVPR	CID
LETMREKVLTSSARQR	16	84	477.014	4	12.81	1904.03	-0.2		98 99 99 86 95 95 92 99 98 95 82 69 25 39 79 97	LETMREKVLTSSARQR	CID
QVPQVTSYGLVEKVDSLGK	19	84	683.062	3	24.25	2046.1	31.8		94 99 97 97 97 66 59 87 43 97 96 97 85 78 86 76 78 74 94	QVPQVTSYGLVEKVDSLGK	CID
GMDTQPESERMPC(+57.02)TEDYLSLLLNR	24	84	952.449	3	31.41	2854.29	11.2	Carbamidomethylation	23 19 49 94 93 98 99 97 97 95 80 50 59 95 99 99 99 99 97 96 97 96 92 98	GMDTQPESERMPC(+57.02)TEDYLSLLLNR	CID
FFKKHRKFKFKEFFKK	16	84	740.789	3	24.16	2219.29	25		92 92 95 95 32 50 79 88 94 93 79 86 88 90 95 98	FFKKHRKFKFKEFFKK	CID
LEALQEGNSLAEYHAK	16	84	591.648	3	16.25	1771.87	26.4		87 93 96 93 89 91 65 76 82 98 96 98 88 74 49 72	LEALQEGNSLAEYHAK	CID
KQKSPKKFEKK	11	84	459.293	3	19.66	1374.83	17.5		95 93 93 45 33 95 97 96 92 88 97	KQKSPKKFEKK	CID
KFDLHAEHFK	10	84	636.307	2	14.11	1270.65	-36.4		90 97 99 98 35 41 95 89 97 98	KFDLHAEHFK	CID
KGAC(+57.02)LLPQFKQAR	13	84	758.928	2	20.58	1515.83	4.3	Carbamidomethylation	95 79 89 95 99 100 91 88 89 71 65 32 98	KGAC(+57.02)LLPQFKQAR	CID
HSKQKTALVELLK	13	84	747.977	2	24.54	1493.89	30.9		26 38 85 92 94 96 88 92 96 98 98 100 100	HSKQKTALVELLK	CID
LSALAAGDGSGQGAAPR	17	84	749.86	2	15.34	1497.75	-32		89 85 90 95 98 98 92 98 86 90 72 29 57 88 91 85 97	LSALAAGDGSGQGAAPR	CID
TRGQVGLAR	9	84	479.284	2	6.28	956.552	2		80 92 91 94 95 86 71 55 97	TRGQVGLAR	CID
GYKHTLNQLDSVKVWPR	17	84	511.032	4	19.35	2040.09	5		24 43 89 88 96 95 85 70 98 98 97 95 93 88 87 94 100	GYKHTLNQLDSVKVWPR	CID
ALTVTKVQSKFPK	13	84	723.946	2	15.99	1445.86	12		84 89 96 97 96 91 85 69 48 66 92 90 95	ALTVTKVQSKFPK	CID
LKKGDVELLKHKPK	14	84	545.014	3	17.18	1632.01	6.2		67 69 72 46 85 96 98 98 97 93 89 93 91 86	LKKGDVELLKHKPK	CID
KDQYLPDEGDKKR	13	84	796.428	2	17.82	1590.8	26		51 87 91 99 100 97 97 75 44 90 84 86 96	KDQYLPDEGDKKR	CID
KTQLTSHFLTK	11	84	652.393	2	22.59	1302.73	31.7		87 92 84 89 83 68 65 81 91 95 92	KTQLTSHFLTK	CID
VSGVSQEK	8	84	417.247	2	6.33	832.429	61.3		85 95 82 91 88 77 65 90	VSGVSQEK	CID
ADLSGLTKEQLPKVSK	16	84	572	3	18.44	1712.97	6.8		88 95 99 99 95 96 93 89 95 91 45 16 72 88 93 97	ADLSGLTKEQLPKVSK	CID
WLGDVGLTEVFDSR	14	84	797.424	2	29.1	1592.78	30.9		81 97 96 99 98 96 99 96 98 93 81 32 24 91	WLGDVGLTEVFDSR	CID
LPENVVGVVSRPVPK	15	84	530.634	3	10.85	1588.93	-31.4		99 97 97 88 88 91 73 82 85 87 85 70 82 57 82	LPENVVGVVSRPVPK	CID
GYQHTLNQLDSVK	13	84	501.605	3	12.8	1501.75	27		24 44 90 87 97 98 93 92 97 96 89 91 95	GYQHTLNQLDSVK	CID
DVSEVVEPK	9	84	501.277	2	13.53	1000.51	31.1		86 84 90 94 68 71 90 85 91	DVSEVVEPK	CID
ASLR	4	84	446.273	1	4.84	445.265	1.5		75 73 92 95	ASLR	CID
SLMENFVAFVGK	12	84	671.357	2	28.59	1340.68	14.2		37 52 88 98 92 92 94 95 93 92 82 93	SLMENFVAFVGK	CID
GSHGKLVELVK	11	84	583.853	2	13.13	1165.68	7.7		32 56 86 94 94 95 96 98 86 90 98	GSHGKLVELVK	CID
LPENVVVKDPAPR	13	84	478.6	3	12.24	1432.8	-18.2		99 95 97 89 97 98 95 91 94 68 41 31 98	LPENVVVKDPAPR	CID
SLMENFVAFVDK	12	84	700.36	2	28.83	1398.69	14.8		37 54 90 99 92 93 95 92 86 90 94 89	SLMENFVAFVDK	CID
RC(+57.02)PGLR	6	84	379.706	2	9.14	757.402	-5.4	Carbamidomethylation	86 80 66 74 98 99	RC(+57.02)PGLR	CID
RHATQADLR	9	84	534.28	2	4.25	1066.56	-16.4		83 67 81 79 73 79 94 97 99	RHATQADLR	CID
FGGAAPK	7	84	324.193	2	9.39	646.344	42.3		82 37 80 94 96 99 98	FGGAAPK	CID
QTDLLNFLSYLADPK	15	84	869.475	2	43.67	1736.9	21.3		34 41 65 96 99 97 98 99 97 88 80 78 93 95 98	QTDLLNFLSYLADPK	CID
FVDGDTK	7	83	391.195	2	14.31	780.365	14.2		82 82 82 50 94 97 99	FVDGDTK	CID
KHRKFKFFKFKFKFEK	16	83	740.782	3	23.53	2219.29	16.5		92 35 50 81 82 94 95 95 95 92 87 90 90 80 82 98	KHRKFKFFKFKFKFEK	CID
TAQVLTSSAR	10	83	517.286	2	10.61	1032.56	1.2		51 55 83 98 98 97 96 85 80 93	TAQVLTSSAR	CID
NLPYLDEFQKK	11	83	697.873	2	18.15	1393.72	5.4		78 87 93 92 96 96 96 62 39 83 96	NLPYLDEFQKK	CID
LKPDNPTLC(+57.02)DEFKADEKKFWGK	22	83	534.072	5	25.47	2665.32	2	Carbamidomethylation	93 88 31 48 77 68 95 98 98 98 97 93 93 89 93 96 91 89 78 75 60 92	LKPDNPTLC(+57.02)DEFKADEKKFWGK	CID
C(+57.02)DQFEKLGEYGFQNALLVR	19	83	763.048	3	28.53	2286.11	5.3	Carbamidomethylation	32 45 89 91 94 56 63 89 98 98 98 96 85 79 86 95 97 96 99	C(+57.02)DQFEKLGEYGFQNALLVR	CID
LKEVLHADSGPC(+57.02)LPHLLSR	19	83	536.293	4	22.87	2141.14	0.3	Carbamidomethylation	92 88 69 48 43 82 90 97 90 78 82 88 92 85 85 95 92 90 98	LKEVLHADSGPC(+57.02)LPHLLSR	CID
FFKKFFQKKMAKKEKEK	17	83	444.871	5	23.12	2219.27	23.3		97 98 99 98 93 90 88 95 94 20 37 73 82 93 85 84 95	FFKKFFQKKMAKKEKEK	CID
WVFVLDVSGSMHGR	14	83	530.609	3	25.97	1588.78	14.2		80 97 96 96 97 98 96 96 82 72 38 59 63 96	WVFVLDVSGSMHGR	CID
ALDKVDAPR	9	83	492.79	2	20.13	983.54	25.4		72 83 84 81 80 86 83 82 97	ALDKVDAPR	CID
QAFLLQGDASATK	13	83	675.349	2	20.3	1348.7	-12		65 74 97 99 99 97 93 98 96 82 79 40 62	QAFLLQGDASATK	CID
EDLSQKFPK	9	83	546.299	2	10.22	1090.57	16.4		52 52 95 94 86 86 94 90 99	EDLSQKFPK	CID
QQNC(+57.02)QNFSSTQDTVVALHALSR	22	83	835.407	3	23.65	2503.19	5.2	Carbamidomethylation	45 48 89 95 89 68 70 86 85 84 86 94 91 89 92 91 95 88 88 88 81 92	QQNC(+57.02)QNFSSTQDTVVALHALSR	CID
VVTGVANALAHRDGK	15	83	503.275	3	17.14	1506.83	-15		98 98 99 95 96 97 95 97 98 93 80 88 41 17 56	VVTGVANALAHRDGK	CID
ALKASDSVAR	10	83	509.296	2	15.13	1016.56	15.9		91 96 95 90 32 51 92 91 94 99	ALKASDSVAR	CID
RTGQVGLAR	9	83	479.283	2	8.42	956.552	-0.5		90 90 90 93 93 39 66 89 98	RTGQVGLAR	CID
AGEPAAR	7	83	336.184	2	11.87	670.34	19.4		77 70 82 79 82 94 96	AGEPAAR	CID
KVPQVPAVTLVEVSR	15	83	541.312	3	21.14	1620.96	-25.7		52 57 77 84 93 76 77 76 88 98 98 98 89 86 94	KVPQVPAVTLVEVSR	CID
LEVEEELLELLPGR	14	83	819.946	2	41.45	1637.89	-6.5		85 93 83 92 91 90 85 88 86 72 68 68 63 96	LEVEEELLELLPGR	CID
QEVLELPK	8	83	478.298	2	14.38	954.539	45.7		71 85 57 86 82 96 90 97	QEVLELPK	CID
ANGTLSVVTVYHAK	14	83	730.401	2	18.86	1458.78	3		33 38 90 97 97 96 95 95 75 73 94 88 95 97	ANGTLSVVTVYHAK	CID
NGMLHGQK	8	83	442.721	2	6.12	883.433	-7.9		89 89 94 97 91 50 56 98	NGMLHGQK	CID
MC(+57.02)PTEDYLSLLLNR	14	83	862.925	2	32.6	1723.83	5	Carbamidomethylation	59 59 43 97 99 99 95 95 91 63 87 92 85 96	MC(+57.02)PTEDYLSLLLNR	CID
SSAENEAVTQLVR	13	83	702.363	2	18.45	1402.71	4.7		32 35 72 98 92 98 95 95 94 83 90 95 98	SSAENEAVTQLVR	CID
DLLDDYVNTQGASLLSLSKR	20	83	736.723	3	30.43	2207.14	1.5		49 50 98 99 99 99 99 92 90 86 68 83 79 86 90 82 85 71 63 89	DLLDDYVNTQGASLLSLSKR	CID
LLC(+57.02)LPLFGPPGPPAAASPFHR	21	83	739.064	3	29.29	2214.18	-3.1	Carbamidomethylation	97 93 38 45 46 72 97 98 96 94 95 99 98 95 96 90 87 72 76 63 96	LLC(+57.02)LPLFGPPGPPAAASPFHR	CID
YNTHKDTLAHR	11	83	678.335	2	3.95	1354.67	-13.8		77 79 85 86 88 79 55 91 88 85 97	YNTHKDTLAHR	CID
KVPQVSPALLVEVSR	15	83	541.314	3	21.28	1620.96	-22.7		91 93 82 91 90 92 27 29 88 98 93 95 89 89 96	KVPQVSPALLVEVSR	CID
DVSLQK	6	83	345.165	2	10.27	688.375	-87.8		60 51 96 99 97 98	DVSLQK	CID
WQVMKTESGTTTHVKSC(+57.02)EYK	20	83	600.798	4	12.42	2399.12	15.5	Carbamidomethylation	89 97 98 88 94 94 95 46 26 87 90 90 86 92 92 89 54 75 94 96	WQVMKTESGTTTHVKSC(+57.02)EYK	CID
HMDTHKSELAHR	12	83	731.34	2	2.47	1460.69	-20.1		34 14 92 97 97 96 96 98 93 93 95 99	HMDTHKSELAHR	CID
TGEQPGPGTC(+57.02)FLAHKK	16	83	576.618	3	8.05	1726.85	-7.7	Carbamidomethylation	95 89 98 88 75 74 34 34 60 97 97 99 99 98 99 100	TGEQPGPGTC(+57.02)FLAHKK	CID
RMLVSVAYSSNGR	13	83	720.418	2	22.5	1438.74	59.5		88 73 95 97 91 90 93 93 89 76 72 30 99	RMLVSVAYSSNGR	CID
KHRKFFKFKFKFKFEK	16	83	740.788	3	23.76	2219.29	24.8		84 31 49 88 90 94 93 93 95 93 82 85 93 85 83 97	KHRKFFKFKFKFKFEK	CID
RHTKLAVPLLLR	12	83	708.968	2	21.37	1415.91	9.1		92 91 97 97 96 56 55 50 68 98 99 100	RHTKLAVPLLLR	CID
AGTDLLNFLSSLFDPKNAPSR	21	83	755.083	3	41.58	2262.16	27.2		86 78 96 99 99 100 97 94 89 90 93 92 87 92 69 69 41 79 49 77 72	AGTDLLNFLSSLFDPKNAPSR	CID
FLSSSSLENQLSSR	14	83	518.929	3	19.68	1553.77	-1.9		97 97 88 43 38 78 82 86 90 89 97 93 92 97	FLSSSSLENQLSSR	CID
LTSLQKFGER	10	83	589.787	2	16.46	1177.65	-73.2		75 66 86 94 82 83 89 67 92 97	LTSLQKFGER	CID
ALLFVGVKVNPTAK	14	83	728.922	2	24.05	1455.88	-36.2		49 68 98 99 99 88 69 61 93 94 95 97 70 84	ALLFVGVKVNPTAK	CID
MRYEK	5	83	363.718	2	19.36	725.353	94.3		69 95 79 90 82	MRYEK	CID
ALKAAFSVAR	10	83	517.294	2	15.61	1032.61	-34		90 97 96 95 51 35 86 90 93 98	ALKAAFSVAR	CID
LSRSC(+57.02)PK	7	83	424.255	2	9.29	846.438	67.5	Carbamidomethylation	85 94 90 79 46 90 98	LSRSC(+57.02)PK	CID
C(+57.02)C(+57.02)TKPESERMWAAEDYLSLLLNR	23	83	948.121	3	31.15	2841.32	5.9	Carbamidomethylation	99 99 99 99 95 97 91 94 60 29 38 33 82 98 98 96 96 85 89 89 79 72 98	C(+57.02)C(+57.02)TKPESERMWAAEDYLSLLLNR	CID
QFLFAKHVLTK	11	83	666.41	2	20.28	1330.78	22.6		86 90 97 93 86 80 27 59 97 99 100	QFLFAKHVLTK	CID
NMENEAVTQLVR	12	83	702.367	2	18.69	1402.69	22.2		33 18 95 96 99 97 95 94 85 92 94 99	NMENEAVTQLVR	CID
LSALAAGDGSGANAAPR	17	83	749.86	2	15.92	1497.75	-32.5		85 85 91 96 97 99 94 98 92 94 75 20 21 85 90 90 98	LSALAAGDGSGANAAPR	CID
ALKAGEWAR	9	83	501.299	2	45.37	1000.55	38.6		78 93 92 97 59 87 67 78 96	ALKAGEWAR	CID
ALQAWWAR	8	83	501.299	2	55.23	1000.52	59.5		78 91 85 91 79 65 79 94	ALQAWWAR	CID
FFKHER	6	83	432.244	2	22.15	862.445	32.7		94 96 91 62 73 80	FFKHER	CID
LAKC(+57.02)ASLQKFWR	12	83	503.273	3	13.73	1506.81	-11.2	Carbamidomethylation	82 77 83 83 83 86 95 91 75 79 71 96	LAKC(+57.02)ASLQKFWR	CID
DKDLSSDR	8	83	468.235	2	7.83	934.436	20.2		87 88 97 96 93 51 62 93	DKDLSSDR	CID
LGKHSR	6	83	349.206	2	2.51	696.403	-8.4		92 82 85 79 78 84	LGKHSR	CID
KNYELLC(+57.02)GDNTR	12	83	741.862	2	14.15	1481.69	10.9	Carbamidomethylation	82 88 90 97 92 90 86 66 82 70 71 82	KNYELLC(+57.02)GDNTR	CID
KDLYLEYPK	9	83	584.849	2	15.87	1167.62	56.2		50 76 89 94 93 93 68 91 95	KDLYLEYPK	CID
QTDLLNFLSSLFDPKNAPSR	20	83	755.084	3	41.16	2262.16	29.3		80 94 98 99 99 98 98 99 95 92 92 86 89 65 67 35 79 51 76 70	QTDLLNFLSSLFDPKNAPSR	CID
LGFK	4	83	464.289	1	9.95	463.279	4.7		84 62 91 95	LGFK	CID
ALKAMASVAR	10	83	509.297	2	14.79	1016.58	-0.6		89 93 92 91 41 57 88 88 95 99	ALKAMASVAR	CID
TPLVGQNSLPGTDKDTLSSK	20	83	686.723	3	23.99	2057.06	40.1		97 99 100 99 98 96 80 72 90 82 71 78 50 56 78 70 82 82 87 96	TPLVGQNSLPGTDKDTLSSK	CID
RFPAFSSLFNLLNDPK	16	83	933.524	2	40.78	1864.98	27		57 43 24 89 94 95 96 97 95 94 96 95 79 88 91 98	RFPAFSSLFNLLNDPK	CID
YASRSAAHLPK	11	83	600.827	2	15.84	1199.64	-1.4		88 92 94 84 79 76 39 76 96 95 95	YASRSAAHLPK	CID
RHPEYEKVLLR	11	83	720.421	2	54.43	1438.8	16.6		95 95 90 96 89 40 25 90 96 99 100	RHPEYEKVLLR	CID
ALHK	4	83	468.295	1	2.65	467.286	4.5		78 79 83 91	ALHK	CID
WLNC(+57.02)PR	6	83	423.216	2	10.63	844.401	19.6	Carbamidomethylation	86 95 81 74 74 89	WLNC(+57.02)PR	CID
ALKAWKER	8	83	501.301	2	52.12	1000.58	5.2		83 91 89 91 81 62 78 89	ALKAWKER	CID
KLPDPNTLC(+57.02)DEFKADEKK	18	83	537.774	4	18.4	2147.06	4.8	Carbamidomethylation	45 63 82 93 74 85 98 97 92 91 91 73 74 73 83 92 90 94	KLPDPNTLC(+57.02)DEFKADEKK	CID
ALDMEDFKTEVSLAPGAK	18	83	641.332	3	24.73	1920.95	12.1		38 52 98 83 96 94 90 92 91 98 92 89 93 93 85 72 82 52	ALDMEDFKTEVSLAPGAK	CID
SLAPTAATK	9	83	430.248	2	9.47	858.481	1.5		79 89 97 92 90 92 90 46 70	SLAPTAATK	CID
LC(+57.02)VLHEKTPVDTKVTK	16	83	623.353	3	15	1867.02	6.6	Carbamidomethylation	93 93 96 92 81 95 96 97 90 88 34 20 72 85 96 98	LC(+57.02)VLHEKTPVDTKVTK	CID
AMTNLRAC(+57.02)STSK	12	83	670.333	2	9.62	1338.64	9.1	Carbamidomethylation	91 78 94 85 88 91 43 45 88 95 98 99	AMTNLRAC(+57.02)STSK	CID
RHPEYKEVLLR	11	83	720.419	2	21.09	1438.8	12.9		97 96 92 96 89 26 40 85 92 98 99	RHPEYKEVLLR	CID
ATADSLANNFLVR	13	82	464.583	3	16.3	1390.72	5.7		92 94 95 95 67 87 73 37 83 76 87 90 99	ATADSLANNFLVR	CID
AVVLLAFSQYLQQC(+57.02)PFDEHVK	21	82	831.43	3	35.78	2491.26	4	Carbamidomethylation	38 44 97 99 100 100 99 97 94 96 97 95 90 94 73 73 86 75 28 68 92	AVVLLAFSQYLQQC(+57.02)PFDEHVK	CID
WTDC(+57.02)TSNFC(+57.02)LFTVESKDLLFRDDTK	25	82	775.365	4	27.54	3097.42	4.4	Carbamidomethylation	88 99 99 98 99 96 93 96 96 97 97 81 28 45 79 76 90 90 90 76 40 40 86 91 97	WTDC(+57.02)TSNFC(+57.02)LFTVESKDLLFRDDTK	CID
GYLFLDEAHLTEALTWLAQKQK	22	82	859.129	3	36.34	2574.35	6.6		25 45 97 99 99 97 97 93 90 70 56 96 88 89 86 82 92 89 80 79 75 94	GYLFLDEAHLTEALTWLAQKQK	CID
YNSESPSKQYSLVKLTK	17	82	493.764	4	16.85	1971.03	-1.2		91 89 88 95 94 83 43 41 78 89 89 90 91 92 95 71 86	YNSESPSKQYSLVKLTK	CID
MAVDAADVGVVLR	13	82	658.357	2	23.52	1314.7	2.4		76 94 98 99 98 97 46 31 66 90 93 86 98	MAVDAADVGVVLR	CID
TVSSGDTGEC(+57.02)TDKAHVDVKLR	21	82	569.53	4	14.73	2274.09	0.8	Carbamidomethylation	56 65 98 97 90 97 96 87 97 93 87 91 90 91 90 94 95 79 23 28 90	TVSSGDTGEC(+57.02)TDKAHVDVKLR	CID
LFTFHADLC(+57.02)TLGSDPDVQLK	20	82	570.046	4	25.77	2276.11	18	Carbamidomethylation	98 97 95 86 85 92 94 92 97 97 97 43 67 72 61 81 34 85 82 94	LFTFHADLC(+57.02)TLGSDPDVQLK	CID
FMETATESLAKYNESSPSK	19	82	707.334	3	19.1	2118.98	0.9		94 86 99 98 93 89 93 89 93 91 94 85 66 39 27 79 73 82 95	FMETATESLAKYNESSPSK	CID
ALEKAGPAAR	10	82	328.529	3	15.25	982.556	9.4		82 90 90 82 85 74 73 68 85 95	ALEKAGPAAR	CID
HLVDEPQNLLKQDC(+57.02)NQFEKLGEYGFQNALLVR	32	82	954.742	4	30.91	3814.91	7.7	Carbamidomethylation	99 99 99 100 99 60 59 61 79 99 98 95 88 37 50 33 40 97 82 88 85 97 95 88 92 86 79 85 93 95 90 90	HLVDEPQNLLKQDC(+57.02)NQFEKLGEYGFQNALLVR	CID
SAEDYQR	7	82	434.667	2	6.12	867.372	-60.9		82 92 97 94 84 37 91	SAEDYQR	CID
TQLPEVFLTK	10	82	588.337	2	24.97	1174.66	0.5		35 44 96 91 90 85 91 96 96 98	TQLPEVFLTK	CID
GFAPADVFVQWLQR	14	82	817.431	2	37.19	1632.84	4.2		23 46 95 95 94 96 94 96 94 81 76 83 79 98	GFAPADVFVQWLQR	CID
QQMEGAGDVAFVK	13	82	690.322	2	28.78	1378.65	-18		33 38 54 99 95 97 88 97 98 92 93 93 95	QQMEGAGDVAFVK	CID
VATMSLPR	8	82	437.753	2	16.56	873.474	20.8		90 82 84 40 79 91 92 99	VATMSLPR	CID
C(+57.02)PRGLR	6	82	379.707	2	9.93	757.402	-2.9	Carbamidomethylation	81 74 82 60 96 99	C(+57.02)PRGLR	CID
YNKSDKSGNQFVLYR	15	82	606.965	3	17.66	1817.91	-17.7		83 79 65 69 79 77 86 62 73 81 92 95 95 95 99	YNKSDKSGNQFVLYR	CID
WFLGSFLYHKNR	12	82	784.385	2	56.52	1566.81	-34.8		73 95 95 90 93 91 93 85 66 74 38 93	WFLGSFLYHKNR	CID
YVVGTALVELLK	12	82	652.889	2	21.89	1303.78	-9		63 67 59 33 89 91 94 96 97 97 99 100	YVVGTALVELLK	CID
TC(+57.02)VADKSC(+57.02)AGC(+57.02)EK	13	82	743.291	2	7.03	1484.61	-25.9	Carbamidomethylation	88 91 97 96 93 83 30 31 92 80 92 97 97	TC(+57.02)VADKSC(+57.02)AGC(+57.02)EK	CID
EDKC(+57.02)C(+57.02)AWTSLAAC(+57.02)FAVEGPK	20	82	767.375	3	31.27	2299.01	41.7	Carbamidomethylation	95 95 88 90 89 86 77 28 29 86 83 92 88 89 88 89 94 78 82 96	EDKC(+57.02)C(+57.02)AWTSLAAC(+57.02)FAVEGPK	CID
KATVQVVGSPK	11	82	557.354	2	16.16	1112.66	33.3		92 94 92 89 84 80 79 23 83 88 97	KATVQVVGSPK	CID
TC(+57.02)VADEMDAGC(+57.02)EK	13	82	743.292	2	7.08	1484.56	7.9	Carbamidomethylation	84 88 97 94 95 93 17 44 80 82 95 98 98	TC(+57.02)VADEMDAGC(+57.02)EK	CID
FLDGRDC(+57.02)TQLSSR	13	82	518.928	3	19.39	1553.73	22.7	Carbamidomethylation	96 96 79 39 88 90 72 79 88 89 76 79 94	FLDGRDC(+57.02)TQLSSR	CID
EAGPAAR	7	82	336.184	2	11.93	670.34	19.1		91 84 67 69 80 89 94	EAGPAAR	CID
VTASPQSLSSGLR	13	82	651.848	2	18.7	1301.69	-10.1		95 97 99 99 98 96 95 96 57 33 19 85 98	VTASPQSLSSGLR	CID
KQTALSYLLK	10	82	582.854	2	22.08	1163.69	1.1		93 93 93 89 78 59 33 88 95 98	KQTALSYLLK	CID
SEVLHEKTPVSEKVTK	16	82	453.507	4	15.36	1809.98	8.2		32 54 93 96 89 93 82 90 95 95 78 77 65 83 91 96	SEVLHEKTPVSEKVTK	CID
TSDANLNWDRAKDKK	15	82	587.965	3	14.08	1760.88	-3.9		92 94 98 96 85 94 88 86 92 44 15 61 89 92 98	TSDANLNWDRAKDKK	CID
VDSLQKFLATGAGALAWSVAR	21	82	541.041	4	28.07	2160.17	-15.7		74 85 85 94 89 94 97 55 32 39 71 95 82 83 93 97 95 94 92 92 98	VDSLQKFLATGAGALAWSVAR	CID
GYKHTLDQLDSVKVEGPR	18	82	511.279	4	20.51	2041.06	13.5		20 37 62 55 92 98 99 96 94 95 96 95 94 91 92 79 95 100	GYKHTLDQLDSVKVEGPR	CID
KFDLAHEHFK	10	82	636.307	2	14.07	1270.65	-36.5		90 97 99 98 41 27 93 87 97 98	KFDLAHEHFK	CID
TDGLLNFLSSFLDPK	15	82	833.952	2	43.69	1665.86	17.4		30 44 23 90 98 93 95 96 97 96 94 95 97 94 97	TDGLLNFLSSFLDPK	CID
FMETATESLAQLPTVHTLFGDELC(+57.02)K	25	82	710.359	4	22.61	2837.36	16.6	Carbamidomethylation	94 89 99 99 98 90 93 86 92 88 40 43 21 72 77 82 92 95 89 68 88 92 89 92 96	FMETATESLAQLPTVHTLFGDELC(+57.02)K	CID
GKFPDATETDLQELVKARDSFASK	24	82	664.098	4	24.93	2652.34	8.6		34 59 98 96 97 94 95 99 97 98 99 97 95 93 86 75 68 82 37 25 79 85 94 98	GKFPDATETDLQELVKARDSFASK	CID
LGEYGFQNALLTTGYPR	17	82	634.013	3	26.73	1898.95	34		97 95 99 99 79 70 90 90 93 98 96 33 31 56 89 88 99	LGEYGFQNALLTTGYPR	CID
EGC(+57.02)ALGHLDGK	11	82	578.772	2	11.58	1155.53	-4.5	Carbamidomethylation	90 69 93 98 99 90 91 92 81 21 81	EGC(+57.02)ALGHLDGK	CID
WDNYQEC(+57.02)YLAMVPSHAVVAR	20	82	803.726	3	25.59	2408.1	22	Carbamidomethylation	63 91 86 89 92 93 39 35 92 94 86 96 88 89 84 89 86 81 80 91	WDNYQEC(+57.02)YLAMVPSHAVVAR	CID
RVAR	4	82	501.301	1	59.03	500.318	-48.4		79 78 82 90	RVAR	CID
YDENADDPR	9	82	547.724	2	7.62	1093.43	2.9		94 97 97 71 70 90 92 41 88	YDENADDPR	CID
LC(+57.02)GVPGLR	8	82	436.249	2	9.13	870.475	10.6	Carbamidomethylation	90 89 83 82 72 61 83 96	LC(+57.02)GVPGLR	CID
HTFKDASVESSSGEAFHVGK	20	82	707.347	3	20.07	2119	11		90 94 48 29 46 57 59 93 99 100 100 98 76 87 90 93 91 98 95 98	HTFKDASVESSSGEAFHVGK	CID
KRHFKKFFKKFFKFEK	16	82	740.787	3	24.6	2219.29	23.2		86 57 24 90 95 93 93 87 90 82 78 85 92 82 82 97	KRHFKKFFKKFFKFEK	CID
KRHFKKFFKFFKKFEK	16	82	555.841	4	64.56	2219.29	21.5		85 60 24 91 95 86 86 90 94 94 88 84 85 71 84 96	KRHFKKFFKFFKKFEK	CID
DLLDDYVNTQGASLLSLSRK	20	82	736.731	3	30.88	2207.14	12.6		46 51 98 99 99 96 95 90 90 85 67 81 76 86 87 79 81 73 82 79	DLLDDYVNTQGASLLSLSRK	CID
YERSPR	6	82	404.225	2	15.94	806.403	38.6		82 94 90 48 81 98	YERSPR	CID
LQAWDAAR	8	82	465.78	2	15.79	929.472	79.7		88 90 96 79 74 54 81 95	LQAWDAAR	CID
FFKKFFKKFFKQKGMKK	17	82	748.116	3	23.66	2241.3	11.4		95 95 97 97 83 80 97 98 98 98 89 60 63 43 12 90 99	FFKKFFKKFFKQKGMKK	CID
LENGFTNKVLTSSAR	15	82	409.971	4	11.22	1635.86	-1.2		96 97 50 19 45 88 83 86 95 98 95 95 92 92 97	LENGFTNKVLTSSAR	CID
FFKQKFFKRHKFFKEK	16	82	740.788	3	24.69	2219.25	39.9		93 94 94 87 54 51 52 91 92 73 82 82 89 89 90 95	FFKQKFFKRHKFFKEK	CID
LC(+57.02)PGRLR	7	82	436.247	2	9.05	870.486	-7.6	Carbamidomethylation	88 79 70 54 85 97 99	LC(+57.02)PGRLR	CID
NAVGTR	6	82	309.186	2	7.14	616.329	45		45 67 97 90 95 97	NAVGTR	CID
DPMVGEK	7	82	388.19	2	6.26	774.358	9.6		93 82 72 86 49 96 94	DPMVGEK	CID
ADKVWPR	7	82	436.258	2	14.45	870.471	35		70 81 72 79 82 89 98	ADKVWPR	CID
KVPQVSTPTLVELEK	15	82	834.483	2	22.67	1666.95	0.6		89 95 92 95 95 93 93 88 85 88 73 81 29 52 76	KVPQVSTPTLVELEK	CID
TLGLLTLPK	9	82	478.301	2	13.93	954.611	-25		77 85 57 88 85 65 94 95 98	TLGLLTLPK	CID
AAAQEQYNAENEAVTQLVR	19	82	702.368	3	18.16	2104.02	30.2		40 44 94 93 98 87 89 82 88 94 85 94 86 82 77 74 85 85 93	AAAQEQYNAENEAVTQLVR	CID
TLLGYATSR	9	82	491.272	2	14.03	980.529	0.3		87 93 98 55 57 85 90 84 94	TLLGYATSR	CID
LPENVVVAGDVPPK	14	82	478.601	3	12.34	1432.79	-8.9		95 89 95 90 92 98 95 90 44 85 82 79 46 74	LPENVVVAGDVPPK	CID
QFASALPGLSATK	13	82	645.851	2	15.5	1289.7	-8.3		84 88 88 82 78 94 68 56 59 86 93 97 98	QFASALPGLSATK	CID
SC(+57.02)HTAVDSLKGWNLPMGLLYSK	22	82	826.423	3	28.75	2476.22	9.1	Carbamidomethylation	93 95 99 99 99 97 93 40 46 49 41 63 94 98 85 67 72 95 98 95 96 99	SC(+57.02)HTAVDSLKGWNLPMGLLYSK	CID
SDSFVYLEPLPR	12	82	711.874	2	26.44	1421.72	9.7		32 50 92 92 94 94 95 96 74 86 86 97	SDSFVYLEPLPR	CID
KEDLLKDC(+57.02)AAEK	12	82	473.904	3	12.04	1418.71	-11.3	Carbamidomethylation	93 98 90 81 89 90 91 90 34 37 96 97	KEDLLKDC(+57.02)AAEK	CID
GKFPDATETDLKELVAKR	18	82	673.366	3	23.64	2017.08	-4		24 46 96 84 86 88 85 96 92 95 95 77 90 87 82 81 82 95	GKFPDATETDLKELVAKR	CID
TSDANLNWNNLQGK	14	82	787.911	2	16.69	1573.75	37.1		46 50 98 97 97 98 95 93 89 82 93 45 76 94	TSDANLNWNNLQGK	CID
LMALHEKTPVSEKVTK	16	82	453.508	4	15.07	1810	0.1		86 18 34 94 86 94 88 86 89 97 89 93 81 91 94 97	LMALHEKTPVSEKVTK	CID
YLC(+57.02)DNQDTLSSKLKEC(+57.02)C(+57.02)DKPLLEK	24	82	592.291	5	19.41	2956.4	7.7	Carbamidomethylation	40 55 95 97 92 92 98 98 97 96 93 90 93 84 87 78 71 79 79 75 84 40 61 95	YLC(+57.02)DNQDTLSSKLKEC(+57.02)C(+57.02)DKPLLEK	CID
EPVLLFGDELC(+57.02)K	12	82	473.904	3	22.42	1418.71	-15.3	Carbamidomethylation	79 21 39 88 95 96 95 98 96 94 90 95	EPVLLFGDELC(+57.02)K	CID
DVKEAPTK	8	82	444.265	2	14.47	886.476	43.7		82 75 67 87 82 82 88 92	DVKEAPTK	CID
TFKSELAHR	9	82	363.523	3	2.91	1087.58	-28.8		78 75 60 54 86 95 96 96 99	TFKSELAHR	CID
LC(+57.02)MLHEK	7	82	465.738	2	11.19	929.446	16.7	Carbamidomethylation	82 80 55 90 85 95 86	LC(+57.02)MLHEK	CID
AEFVEVTKLVTPMTKLYLTLPK	22	82	631.12	4	35.89	2520.43	9.2		90 97 98 95 97 89 79 75 89 79 71 55 52 77 81 90 83 87 74 57 89 95	AEFVEVTKLVTPMTKLYLTLPK	CID
ASTHQSELAHR	11	82	412.873	3	4.13	1235.6	-1.8		55 48 89 86 86 68 85 97 95 93 98	ASTHQSELAHR	CID
VLDNPTVFALVNYLSFKGK	19	81	709.065	3	39.08	2124.16	5.8		92 94 97 75 16 38 84 94 95 95 96 90 89 93 88 86 88 69 75	VLDNPTVFALVNYLSFKGK	CID
MLEDAPR	7	81	416.226	2	19.88	830.396	50		46 86 88 84 83 88 96	MLEDAPR	CID
GPSVVAVPLTFVR	13	81	671.406	2	36.03	1340.78	12.3		34 45 93 96 98 99 98 92 94 79 56 81 96	GPSVVAVPLTFVR	CID
NYQEAKDAFLGSFLYEYSR	19	81	767.703	3	30.09	2300.07	4.9		34 37 80 94 92 51 50 43 95 99 98 98 97 99 99 99 97 93 97	NYQEAKDAFLGSFLYEYSR	CID
FLAYYLLEPAYFYPFK	16	81	1023.03	2	26.6	2044.04	1.1		44 59 94 95 97 99 99 96 89 97 95 79 62 49 56 94	FLAYYLLEPAYFYPFK	CID
MLEWPR	6	81	416.227	2	19.78	830.411	33.9		55 86 83 81 88 96	MLEWPR	CID
ALQVAR	6	81	329.189	2	15.1	656.397	-51.6		75 89 57 83 89 96	ALQVAR	CID
LSFVTVDRASRR	12	81	469.596	3	21.08	1405.78	-8.6		97 97 99 99 97 95 95 90 20 18 79 94	LSFVTVDRASRR	CID
TVFQYKTR	8	81	521.77	2	14.33	1041.56	-34.1		83 88 92 87 85 83 39 94	TVFQYKTR	CID
EC(+57.02)TLSTHEANK	11	81	645.301	2	13.58	1288.57	11.3	Carbamidomethylation	90 91 95 94 92 86 80 92 73 35 66	EC(+57.02)TLSTHEANK	CID
LFHESVYGAC(+57.02)K	11	81	437.544	3	14.31	1309.61	-1.3	Carbamidomethylation	92 92 90 99 95 93 97 86 34 25 92	LFHESVYGAC(+57.02)K	CID
LVLKDADDR	9	81	522.795	2	17.79	1043.56	13.8		92 91 89 82 84 71 88 57 79	LVLKDADDR	CID
MKLEVLATSVYLK	13	81	498.98	3	24.68	1493.85	44.5		50 78 90 97 97 99 97 96 72 46 37 98 99	MKLEVLATSVYLK	CID
NELTEAFK	8	81	476.245	2	16.41	950.471	3.7		77 94 97 89 94 54 50 95	NELTEAFK	CID
QLEC(+57.02)C(+57.02)DEPLLEK	12	81	511.927	3	13.56	1532.69	49	Carbamidomethylation	76 94 97 56 44 74 74 85 91 91 95 96	QLEC(+57.02)C(+57.02)DEPLLEK	CID
ADFLGSFLYEYSR	13	81	784.382	2	43.73	1566.74	8.6		29 43 79 97 90 93 90 91 88 91 83 88 95	ADFLGSFLYEYSR	CID
SYLSMVGSC(+57.02)C(+57.02)TSPNPTVC(+57.02)KMEER	23	81	898.418	3	26.75	2692.14	33	Carbamidomethylation	50 52 98 98 96 99 98 99 96 90 90 96 88 88 78 82 78 76 29 41 72 79 95	SYLSMVGSC(+57.02)C(+57.02)TSPNPTVC(+57.02)KMEER	CID
LLPPYPR	7	81	428.256	2	19.19	854.501	-5.5		79 95 80 69 78 74 92	LLPPYPR	CID
LTDLAR	6	81	344.701	2	7.75	687.391	-5.1		96 94 60 51 89 97	LTDLAR	CID
DQAHKSELAHR	11	81	646.289	2	3.02	1290.64	-61.4		73 65 51 85 91 88 92 89 82 81 97	DQAHKSELAHR	CID
LVTDLTKVKHEC(+57.02)C(+57.02)HGDLLEC(+57.02)ADDNLDLAK	29	81	677.331	5	19.61	3381.6	5.7	Carbamidomethylation	99 98 99 99 97 95 95 93 78 61 91 55 57 85 25 51 91 92 95 88 82 86 82 38 49 79 94 99 100	LVTDLTKVKHEC(+57.02)C(+57.02)HGDLLEC(+57.02)ADDNLDLAK	CID
YLC(+57.02)DKHNTLSSK	12	81	733.319	2	11.7	1464.7	-54.2	Carbamidomethylation	82 94 90 92 76 41 38 89 86 89 97 98	YLC(+57.02)DKHNTLSSK	CID
LTSLQKLR	8	81	479.762	2	15.67	957.597	-91.8		52 41 91 96 93 86 90 97	LTSLQKLR	CID
LGQYTSVPAKR	11	81	610.344	2	12.19	1218.67	0.4		91 76 84 97 95 90 70 43 71 77 95	LGQYTSVPAKR	CID
AMTNLRQGAYSK	12	81	670.329	2	10.41	1338.67	-20.3		85 70 93 85 89 88 85 37 67 76 97 99	AMTNLRQGAYSK	CID
LALEVYNFDSR	11	81	663.834	2	26.63	1325.66	-5.9		56 52 98 99 98 92 79 69 73 78 94	LALEVYNFDSR	CID
C(+57.02)EAEVPDVSSLKASR	15	81	824.428	2	33.24	1646.79	29.9	Carbamidomethylation	79 95 96 99 99 94 96 89 86 57 74 32 77 44 95	C(+57.02)EAEVPDVSSLKASR	CID
KLGDTYHR	8	81	495.261	2	6.23	988.509	-2.2		92 95 73 81 71 65 71 97	KLGDTYHR	CID
DTDFQLNEKAVR	12	81	479.256	3	17.14	1434.71	25		94 95 99 96 93 98 89 94 75 28 29 79	DTDFQLNEKAVR	CID
ATEEQLKTVMENFVAFVDKC(+57.02)C(+57.02)AADDKEAC(+57.02)FAVEGPK	36	81	822.386	5	35.2	4106.87	4.9	Carbamidomethylation	41 44 96 62 40 55 49 33 38 96 100 99 99 100 98 97 96 96 93 94 91 90 88 91 93 89 96 92 91 89 85 84 93 52 68 88	ATEEQLKTVMENFVAFVDKC(+57.02)C(+57.02)AADDKEAC(+57.02)FAVEGPK	CID
WGAHR	5	81	313.639	2	2.44	625.308	-71.4		67 62 87 94 98	WGAHR	CID
C(+57.02)ASLQGAFWVGALKAEGSVAR	21	81	545.298	4	23.35	2177.11	27.5	Carbamidomethylation	95 97 98 97 92 63 85 95 90 86 71 90 94 93 95 54 10 60 62 92 98	C(+57.02)ASLQGAFWVGALKAEGSVAR	CID
ATVLYEWRVALQNK	14	81	845.974	2	18.2	1689.92	7.5		43 48 94 99 98 98 81 87 92 90 91 59 74 92	ATVLYEWRVALQNK	CID
SLLSQHAR	8	81	456.251	2	16.94	910.499	-11.6		82 92 99 96 85 85 41 72	SLLSQHAR	CID
LLESGPFVMNTQKTHSMDC(+57.02)LK	21	81	609.811	4	21.11	2435.16	20.2	Carbamidomethylation	96 96 99 96 91 91 94 94 68 79 74 82 81 74 46 61 46 87 79 85 90	LLESGPFVMNTQKTHSMDC(+57.02)LK	CID
C(+57.02)APHAC(+57.02)VLTHFDKLK	15	81	599.618	3	22.6	1795.89	-29.5	Carbamidomethylation	34 39 88 90 92 88 87 90 85 63 89 93 90 97 98	C(+57.02)APHAC(+57.02)VLTHFDKLK	CID
KLEC(+57.02)C(+57.02)DKFPTEK	12	81	777.892	2	12.83	1553.72	31.3	Carbamidomethylation	92 97 99 96 93 93 89 69 10 50 95 95	KLEC(+57.02)C(+57.02)DKFPTEK	CID
LLDAVEQANSR	11	81	608.317	2	16.99	1214.63	-5.3		87 90 88 82 90 90 74 69 57 72 95	LLDAVEQANSR	CID
QELHVHVLTK	10	81	602.362	2	22.65	1202.68	26.9		81 92 97 91 90 31 43 95 97 99	QELHVHVLTK	CID
VYTPFK	6	81	377.683	2	21.35	753.406	-72.7		72 79 71 79 92 95	VYTPFK	CID
TC(+57.02)VADESHDHHR	12	81	732.307	2	4.74	1462.6	-0.4	Carbamidomethylation	88 93 98 94 96 97 93 86 70 57 15 88	TC(+57.02)VADESHDHHR	CID
ALKEAGPAAR	10	81	328.529	3	15.39	982.556	9.4		85 87 90 85 80 67 69 68 88 94	ALKEAGPAAR	CID
ALKAWVSAR	9	81	501.299	2	16.14	1000.58	1.5		92 95 95 96 89 52 49 68 97	ALKAWVSAR	CID
ALKAFASVAR	10	81	517.295	2	15.47	1032.61	-31.5		91 94 95 96 39 32 83 90 95 99	ALKAFASVAR	CID
SLHTLFGHELC(+57.02)K	12	81	721.348	2	22.72	1440.72	-25.2	Carbamidomethylation	38 55 88 98 98 87 70 56 95 95 96 97	SLHTLFGHELC(+57.02)K	CID
YMKKFYKKHREK	12	81	562.67	3	19.73	1684.92	38.2		78 61 93 95 95 92 95 95 37 74 62 96	YMKKFYKKHREK	CID
SAYVSAVPEER	11	81	604.286	2	15.06	1206.59	-25.2		72 74 78 93 95 92 88 54 82 87 78	SAYVSAVPEER	CID
HTLLNQDSVK	10	81	577.813	2	12.67	1153.61	2.3		89 94 92 78 51 70 89 78 76 95	HTLLNQDSVK	CID
EKVLTSSRAQR	11	81	425.577	3	2.7	1273.71	-1.6		95 93 99 99 98 90 60 67 22 74 93	EKVLTSSRAQR	CID
ALTVTKVSGAKFPK	14	81	723.945	2	16.42	1445.86	10.3		44 59 96 94 95 94 90 84 54 60 76 93 98 100	ALTVTKVSGAKFPK	CID
FLELLTYSSANLHLPK	16	81	462.263	4	18.22	1845	10.8		88 91 92 87 79 28 28 77 89 88 73 93 91 96 96 99	FLELLTYSSANLHLPK	CID
RHPEYARELLR	11	81	720.42	2	56.95	1438.78	32.5		92 93 94 98 92 80 56 56 41 92 98	RHPEYARELLR	CID
FFKKFFKKRHEK	12	81	557.337	3	20.47	1668.96	17.4		93 94 95 95 98 97 95 84 41 18 69 94	FFKKFFKKRHEK	CID
LC(+57.02)VLHEKTPVSEKVTKC(+57.02)C(+57.02)TESLVGGR	26	81	598.311	5	17.9	2986.5	5.2	Carbamidomethylation	96 96 98 96 86 68 61 91 38 45 88 95 89 92 88 79 86 86 83 93 92 95 91 32 43 99	LC(+57.02)VLHEKTPVSEKVTKC(+57.02)C(+57.02)TESLVGGR	CID
ESTTDTK	7	81	391.194	2	14.65	780.35	30.9		88 73 69 50 90 97 98	ESTTDTK	CID
KVNKVSSGQTSANVSR	16	81	831.475	2	21.33	1660.89	29.8		87 94 85 88 90 90 81 54 75 79 71 48 73 91 90 97	KVNKVSSGQTSANVSR	CID
DLLDDYVNTQGASLLKDVTK	20	81	736.73	3	30.83	2207.13	16.3		41 44 96 99 99 97 97 93 92 87 67 80 73 82 84 68 76 73 80 86	DLLDDYVNTQGASLLKDVTK	CID
C(+57.02)LAWSSEAGAK	11	81	590.28	2	14.72	1178.54	5.1	Carbamidomethylation	92 96 97 95 92 87 63 78 15 81 94	C(+57.02)LAWSSEAGAK	CID
MTALAKDC(+57.02)K	9	81	519.291	2	15.73	1036.5	61	Carbamidomethylation	86 97 89 90 79 67 72 72 84	MTALAKDC(+57.02)K	CID
QLLKHFSLLTLMTGGR	16	81	908.038	2	29.05	1814.02	21		37 55 96 93 97 99 98 98 98 93 90 63 80 50 62 95	QLLKHFSLLTLMTGGR	CID
KLRVVC(+57.02)ASLQKFWR	14	81	597.68	3	11.65	1790.01	2.8	Carbamidomethylation	81 90 84 71 67 82 85 91 93 74 75 77 75 94	KLRVVC(+57.02)ASLQKFWR	CID
QKVANLGLQRFEQR	14	81	562.973	3	15.77	1685.93	-20.9		79 93 93 92 90 87 60 76 74 82 69 76 75 95	QKVANLGLQRFEQR	CID
VSESLTVKLPPNVVEESAR	19	81	685.386	3	25.59	2053.11	14.9		86 88 92 85 95 44 26 88 98 90 84 85 94 89 92 90 71 68 85	VSESLTVKLPPNVVEESAR	CID
LEFNGTNKVLTSSAR	15	81	409.971	4	10.49	1635.86	-3.1		95 96 38 30 55 85 78 77 95 98 97 97 94 93 96	LEFNGTNKVLTSSAR	CID
QTALVELLQHKPK	13	81	752.975	2	19.57	1503.88	38.2		71 84 87 96 89 91 84 89 70 63 79 86 70	QTALVELLQHKPK	CID
TPLVGQPSLRAC(+57.02)KDTLSSK	19	81	686.723	3	23.89	2057.09	25.3	Carbamidomethylation	96 96 99 99 96 95 77 71 76 82 24 25 60 90 87 92 92 95 98	TPLVGQPSLRAC(+57.02)KDTLSSK	CID
SMLSTALVELLK	12	81	652.895	2	21.69	1303.74	25.2		68 29 72 56 89 89 93 96 95 94 98 99	SMLSTALVELLK	CID
TWPVLMPC(+57.02)FLAHK	13	81	533.919	3	9	1598.81	-47.5	Carbamidomethylation	88 89 74 84 88 50 28 71 95 97 97 98 99	TWPVLMPC(+57.02)FLAHK	CID
TSGSWSTLQTQDKR	14	81	797.907	2	13.11	1593.77	15.6		38 44 79 93 91 95 95 96 89 77 76 90 80 96	TSGSWSTLQTQDKR	CID
KEMHK	5	81	336.681	2	2.45	671.342	7.5		82 89 67 83 87	KEMHK	CID
AEFVETVK	8	81	461.748	2	14.37	921.481	1.2		91 97 98 96 97 43 38 92	AEFVETVK	CID
EAFQYKEK	8	81	521.77	2	13.88	1041.51	12.9		83 69 93 85 85 91 69 77	EAFQYKEK	CID
LKLSWYELTK	10	81	640.862	2	18.26	1279.72	-5.9		90 90 95 83 63 62 84 77 79 90	LKLSWYELTK	CID
TVTTTLVK	8	81	431.766	2	16.16	861.517	-0.3		70 69 91 87 85 89 80 81	TVTTTLVK	CID
MPC(+57.02)TEDYLSLLLLHYWRHEKTPVSEKVTK	29	81	715.586	5	34.34	3572.82	21.7	Carbamidomethylation	94 96 97 96 98 84 72 97 99 100 100 98 48 19 23 25 46 74 91 86 92 87 87 86 92 88 91 96 99	MPC(+57.02)TEDYLSLLLLHYWRHEKTPVSEKVTK	CID
MAEAC(+57.02)C(+57.02)DKPLLEK	13	81	522.264	3	11.95	1563.71	39.5	Carbamidomethylation	52 76 71 66 69 81 88 86 88 93 94 96 96	MAEAC(+57.02)C(+57.02)DKPLLEK	CID
MTALAWGC(+57.02)K	9	81	519.283	2	15.77	1036.48	66.4	Carbamidomethylation	82 95 88 90 76 67 62 80 89	MTALAWGC(+57.02)K	CID
LAMLHEKTPVSEKVTK	16	81	453.509	4	15.12	1810	1.8		86 40 15 93 85 94 89 87 93 92 84 89 79 85 90 97	LAMLHEKTPVSEKVTK	CID
VLSAADKGNVKAAEGGK	17	81	538.973	3	14.23	1613.87	14.8		96 97 97 95 90 94 92 74 32 30 86 90 90 84 61 79 91	VLSAADKGNVKAAEGGK	CID
KFLFAGVHALTK	12	81	444.606	3	19.64	1330.78	15.7		90 94 94 88 88 79 85 31 31 96 99 99	KFLFAGVHALTK	CID
SDQAALAAVDYLNKHLPR	18	81	661.342	3	32.39	1981.04	-17.2		24 32 79 90 93 95 94 94 92 96 89 83 72 74 77 91 86 96	SDQAALAAVDYLNKHLPR	CID
AAAEPLPR	8	81	412.753	2	16.26	823.455	44.2		89 85 79 68 39 97 92 98	AAAEPLPR	CID
ALKASVAWR	9	81	501.299	2	15.57	1000.58	1		85 92 89 93 79 75 76 48 92	ALKASVAWR	CID
QEQC(+57.02)VVMAEGGSK	13	81	711.828	2	11.15	1421.63	9.7	Carbamidomethylation	37 51 78 92 95 97 92 97 97 72 71 89 84	QEQC(+57.02)VVMAEGGSK	CID
EVPVNPMC(+57.02)LYR	11	81	689.346	2	25.44	1376.66	14.9	Carbamidomethylation	79 56 87 93 93 86 72 79 75 73 95	EVPVNPMC(+57.02)LYR	CID
DPALVELLQHKPKATEEQLK	20	81	572.585	4	24.63	2286.26	23.6		63 43 95 98 96 95 92 91 88 73 91 79 73 71 68 84 82 54 86 92	DPALVELLQHKPKATEEQLK	CID
FFESFGDLSSADALLGNPK	19	80	1008	2	31.21	2013.97	9.4		39 40 68 52 45 95 99 98 98 95 91 95 92 97 97 89 91 81 73	FFESFGDLSSADALLGNPK	CID
LC(+57.02)VNKHKTPPAFKVTK	16	80	623.352	3	56.3	1867.05	-8.5	Carbamidomethylation	81 84 89 90 79 71 96 98 94 86 69 44 78 85 61 82	LC(+57.02)VNKHKTPPAFKVTK	CID
LSAGASC(+57.02)PK	9	80	445.758	2	13.47	889.433	76.6	Carbamidomethylation	86 94 88 68 61 78 60 93 98	LSAGASC(+57.02)PK	CID
LPTQPQDVDDKHGKFK	16	80	618.333	3	18.06	1851.95	15.7		97 93 93 87 79 86 96 97 98 98 85 41 48 43 74 75	LPTQPQDVDDKHGKFK	CID
ALKAWSVVK	9	80	501.297	2	59.48	1000.61	-28.3		84 90 95 97 90 75 77 68 50	ALKAWSVVK	CID
SPTSQEVMFLTLQVKGPTQEFK	22	80	832.437	3	29.44	2494.28	4		54 45 97 96 93 97 97 94 97 98 97 97 94 86 86 76 69 28 24 82 73 92	SPTSQEVMFLTLQVKGPTQEFK	CID
MANYVSDAFHK	11	80	641.832	2	17.91	1281.58	52.7		55 83 75 91 93 82 85 80 76 72 93	MANYVSDAFHK	CID
WFLGSFLYESYR	12	80	784.381	2	39.03	1566.75	-1.7		76 93 98 92 95 94 96 93 91 22 21 95	WFLGSFLYESYR	CID
LKGTSLSLR	9	80	487.803	2	13.88	973.592	0.2		96 94 93 88 31 54 83 88 98	LKGTSLSLR	CID
C(+57.02)KMGEYGFQNALLVR	15	80	893.462	2	26.25	1784.87	21.5	Carbamidomethylation	43 32 40 63 92 95 93 95 90 89 88 95 97 98 99	C(+57.02)KMGEYGFQNALLVR	CID
LFTFHADLC(+57.02)TLPDANEDGLKKQTALVELLK	30	80	680.977	5	30.19	3399.77	21.7	Carbamidomethylation	99 98 99 97 93 95 73 71 97 98 99 94 92 67 27 43 37 10 76 76 80 79 82 83 88 83 92 91 97 99	LFTFHADLC(+57.02)TLPDANEDGLKKQTALVELLK	CID
C(+57.02)VDTHKSELAHR	12	80	726.817	2	2.7	1451.69	-51	Carbamidomethylation	60 62 90 92 90 90 88 91 78 68 61 95	C(+57.02)VDTHKSELAHR	CID
HLEVDVRLLEPQGLR	15	80	592.005	3	25.07	1772.99	1.3		97 99 99 95 87 34 50 89 89 96 66 67 56 86 97	HLEVDVRLLEPQGLR	CID
SSFLDPKK	8	80	461.231	2	11.52	920.497	-53.5		90 91 90 93 93 77 38 72	SSFLDPKK	CID
MALEDGGLAR	10	80	516.761	2	15.86	1031.51	1.4		74 93 99 99 95 73 66 82 45 77	MALEDGGLAR	CID
TPLVGVANYPGGPVR	15	80	748.918	2	21.55	1495.81	4.2		93 89 96 93 82 76 66 62 74 78 65 74 73 85 99	TPLVGVANYPGGPVR	CID
VKYTVC(+57.02)LDAR	10	80	612.814	2	23.33	1223.63	-16.7	Carbamidomethylation	89 86 96 96 88 82 85 49 38 95	VKYTVC(+57.02)LDAR	CID
DPALVLLHFPHVYHSK	16	80	469.008	4	23.91	1872	-0.2		83 23 21 75 94 99 99 95 94 91 84 87 78 70 95 98	DPALVLLHFPHVYHSK	CID
VTSLTKERELSAKNNQHLC(+57.02)AVMGK	24	80	679.365	4	25.08	2713.4	11.5	Carbamidomethylation	95 96 98 99 98 92 94 55 60 49 38 28 72 50 72 77 92 95 94 96 97 89 95 99	VTSLTKERELSAKNNQHLC(+57.02)AVMGK	CID
KQKLLFEMK	9	80	582.85	2	22.03	1163.67	9.7		90 91 85 88 88 82 90 16 93	KQKLLFEMK	CID
DEHQSELAHR	10	80	611.306	2	6.07	1220.55	36		41 55 75 85 89 94 91 86 89 98	DEHQSELAHR	CID
MSTLTGVPPR	10	80	529.766	2	16.47	1057.56	-39.6		76 94 96 94 91 76 68 33 80 94	MSTLTGVPPR	CID
GYQHTLNQLDSVGAVWPR	18	80	511.031	4	19.59	2040.02	36.8		19 35 79 82 96 97 91 90 98 99 98 95 43 67 80 85 94 100	GYQHTLNQLDSVGAVWPR	CID
ASEC(+57.02)PGPAQK	10	80	522.742	2	6.58	1043.47	-1.4	Carbamidomethylation	75 83 96 98 90 79 78 77 37 88	ASEC(+57.02)PGPAQK	CID
QNLHEK	6	80	384.688	2	11.77	767.393	-39.6		45 54 95 93 99 97	QNLHEK	CID
NQPLLK	6	80	356.72	2	18.73	711.428	-4.3		63 76 50 95 98 99	NQPLLK	CID
KNPDPQESLQR	11	80	656.332	2	16.63	1310.66	-6.1		46 45 83 95 86 87 95 88 85 77 93	KNPDPQESLQR	CID
HLVDEKNMTLK	11	80	664.352	2	18.76	1326.7	-4.6		98 99 99 99 98 88 73 13 24 93 97	HLVDEKNMTLK	CID
FRAPFSSLFNLLNDPK	16	80	933.514	2	41.16	1864.98	16.1		33 54 29 35 92 95 96 97 97 96 97 95 82 91 94 99	FRAPFSSLFNLLNDPK	CID
QNC(+57.02)DQEFKLGEYGFQNALLVR	21	80	843.749	3	28.74	2528.21	5.5	Carbamidomethylation	77 85 92 91 80 56 40 30 45 80 96 96 92 92 85 80 85 93 95 94 98	QNC(+57.02)DQEFKLGEYGFQNALLVR	CID
SLHTLFGDEESK	12	80	681.842	2	23.83	1361.65	16.5		40 57 92 99 99 97 89 96 97 59 40 96	SLHTLFGDEESK	CID
KFLPLKDC(+57.02)AAEK	12	80	473.904	3	12.37	1418.76	-49.7	Carbamidomethylation	94 95 97 86 95 93 95 92 21 15 88 92	KFLPLKDC(+57.02)AAEK	CID
TQNREK	6	80	388.19	2	6.81	774.398	-42.7		82 76 49 91 93 89	TQNREK	CID
DAFLGSFLYEYSR	13	80	784.38	2	31.33	1566.74	6.6		56 50 95 100 99 99 99 99 99 96 25 27 97	DAFLGSFLYEYSR	CID
FLAYYLLEPAYFRHNK	16	80	1023.03	2	26.65	2044.06	-8.5		33 45 86 92 96 99 98 95 89 97 95 80 80 17 82 95	FLAYYLLEPAYFRHNK	CID
STTC(+57.02)QQQMEQLLPAKDLEALFVSESKK	27	80	778.145	4	32.53	3108.55	1.2	Carbamidomethylation	41 45 90 89 77 75 90 80 94 91 98 96 35 30 78 91 87 94 89 90 80 80 85 93 79 86 95	STTC(+57.02)QQQMEQLLPAKDLEALFVSESKK	CID
TEGLFPLQR	9	80	530.766	2	4.35	1059.57	-50		83 94 71 87 80 46 89 75 93	TEGLFPLQR	CID
WFLGSFLYHQNR	12	80	784.382	2	41.13	1566.77	-15.6		77 95 99 97 97 95 96 91 62 27 30 93	WFLGSFLYHQNR	CID
AVPFTGK	7	80	360.207	2	15.8	718.401	-3.5		43 49 88 92 95 94 99	AVPFTGK	CID
LKPDPNTLC(+57.02)DEFKWEKKFWGQYLVLTYR	28	80	715.769	5	30.03	3573.81	-0.4	Carbamidomethylation	93 89 80 89 32 39 95 98 89 90 59 37 83 82 94 90 86 85 82 63 72 83 89 75 88 83 91 99	LKPDPNTLC(+57.02)DEFKWEKKFWGQYLVLTYR	CID
FSLETMREK	9	80	570.764	2	6.89	1139.56	-45.7		77 79 92 95 79 44 83 82 87	FSLETMREK	CID
LC(+57.02)VLHEKTKSVEVPTK	16	80	623.351	3	56.01	1867.02	4.3	Carbamidomethylation	79 84 95 92 79 92 94 97 88 80 70 61 67 30 77 95	LC(+57.02)VLHEKTKSVEVPTK	CID
VDDLC(+57.02)VLHEKTPVSEKVTK	19	80	550.02	4	14.73	2196.15	-42.6	Carbamidomethylation	43 33 30 95 96 96 97 91 95 89 94 92 88 76 78 62 76 88 98	VDDLC(+57.02)VLHEKTPVSEKVTK	CID
MPC(+57.02)VMDYLSLLLYTHKLLHEKTPVSEKVTK	30	80	715.578	5	34.53	3572.88	-7.4	Carbamidomethylation	90 92 94 86 65 95 94 98 99 99 98 94 43 35 22 29 40 41 82 95 90 94 90 89 82 90 86 90 95 99	MPC(+57.02)VMDYLSLLLYTHKLLHEKTPVSEKVTK	CID
KVPQVSTPELVEVSR	15	80	834.475	2	21.75	1666.93	5.7		90 89 93 91 95 97 92 69 41 32 69 89 77 79 94	KVPQVSTPELVEVSR	CID
NVTHGASELAHR	12	80	646.289	2	3.5	1290.64	-62		69 71 80 86 55 74 82 92 86 82 81 98	NVTHGASELAHR	CID
FADLGSFLYEYSR	13	80	784.387	2	45.08	1566.74	15		30 32 55 97 96 95 92 95 92 93 84 82 95	FADLGSFLYEYSR	CID
VTHTLFGDELC(+57.02)K	12	80	710.352	2	22.73	1418.69	2.9	Carbamidomethylation	82 87 90 98 98 95 17 38 83 82 92 96	VTHTLFGDELC(+57.02)K	CID
FLYQNAVSLLTPAYLTQNK	19	80	1092.61	2	25.75	2183.16	18.8		34 46 83 88 91 93 95 96 98 98 95 95 88 85 87 34 29 85 92	FLYQNAVSLLTPAYLTQNK	CID
MGDAWDQEAC(+57.02)FAVEGPK	17	80	955.905	2	18.7	1909.8	-0.7	Carbamidomethylation	13 20 39 88 85 95 80 98 98 98 97 95 91 96 87 95 99	MGDAWDQEAC(+57.02)FAVEGPK	CID
DSVQVDAPR	9	80	493.776	2	20.55	985.483	55.7		60 82 77 80 81 85 75 88 98	DSVQVDAPR	CID
DGMHC(+57.02)C(+57.02)LLGR	10	80	609.742	2	16.15	1217.51	-34.2	Carbamidomethylation	49 23 56 96 99 97 98 97 93 99	DGMHC(+57.02)C(+57.02)LLGR	CID
KHRFKKFFKKFFKFEK	16	80	740.787	3	25	2219.29	23.1		85 30 46 89 93 95 96 93 90 87 67 77 90 77 82 95	KHRFKKFFKKFFKFEK	CID
QQASLAGAK	9	80	437.245	2	18.56	872.472	4.4		76 52 95 98 97 92 32 85 98	QQASLAGAK	CID
LAGGEDVRVTMDK	13	80	695.861	2	20.73	1389.69	11.6		94 92 94 86 97 98 92 90 93 92 22 48 52	LAGGEDVRVTMDK	CID
ALQAWSLGR	9	80	501.3	2	57.8	1000.55	39.3		63 83 82 93 83 85 85 55 95	ALQAWSLGR	CID
LC(+57.02)VNHQKTPVTDKVTK	16	80	623.354	3	14.96	1867	21.5	Carbamidomethylation	93 90 94 83 69 85 94 95 91 91 27 31 73 81 93 98	LC(+57.02)VNHQKTPVTDKVTK	CID
RHHYWLR	7	80	534.28	2	3.65	1066.56	-11.9		91 77 72 71 57 95 99	RHHYWLR	CID
GDELQKFGER	10	80	589.788	2	17.48	1177.57	-10.4		33 79 81 88 84 87 88 72 93 98	GDELQKFGER	CID
KVREVSTQTSANVSR	15	80	831.475	2	21.43	1660.89	30.3		87 94 90 92 84 82 80 73 78 76 40 65 83 87 96	KVREVSTQTSANVSR	CID
TPLVGQPSLPNPVR	14	80	737.932	2	21.91	1473.83	12.7		95 94 99 99 98 97 82 86 95 82 57 18 27 95	TPLVGQPSLPNPVR	CID
LETFRTR	7	80	461.736	2	2.55	921.503	-50.1		79 92 83 68 83 71 85	LETFRTR	CID
EGGPAAR	7	80	329.182	2	15.49	656.324	39.1		86 67 79 69 78 89 94	EGGPAAR	CID
MTGALGHQER	10	80	550.26	2	12.51	1098.52	-16.8		45 77 51 96 99 85 83 74 95 97	MTGALGHQER	CID
VLDQYLFESLR	11	80	691.876	2	28.29	1381.72	9.7		93 97 99 97 98 98 94 93 17 22 75	VLDQYLFESLR	CID
GYNSLGKVGTR	11	80	576.301	2	21.7	1150.61	-19.3		60 80 74 79 86 74 86 95 70 83 94	GYNSLGKVGTR	CID
DDALQKFWR	9	80	589.789	2	16.05	1177.59	-20.6		76 81 63 87 85 85 85 65 95	DDALQKFWR	CID
FC(+57.02)PTPVSEKVTK	12	80	696.825	2	7.76	1391.71	-55.2	Carbamidomethylation	39 41 46 88 96 97 94 95 86 89 92 97	FC(+57.02)PTPVSEKVTK	CID
QAFLLQGDAC(+57.02)VK	12	80	675.355	2	20.72	1348.68	11.1	Carbamidomethylation	68 51 96 99 99 92 80 94 84 77 37 83	QAFLLQGDAC(+57.02)VK	CID
SLQLKQKGYER	11	80	675.385	2	10.79	1348.75	6.1		30 44 82 98 92 83 84 88 84 96 100	SLQLKQKGYER	CID
YLSLLARR	8	80	496.305	2	24.58	990.597	-2.5		82 91 89 92 92 52 76 66	YLSLLARR	CID
WC(+57.02)ALGHQESLGK	12	80	462.563	3	10.29	1384.66	7.6	Carbamidomethylation	89 98 96 96 84 78 82 92 38 77 38 92	WC(+57.02)ALGHQESLGK	CID
DMGTESLVNR	10	80	561.243	2	15.67	1120.52	-42.5		46 16 57 98 100 98 97 94 95 99	DMGTESLVNR	CID
GAQASLAGAK	10	80	437.248	2	18.51	872.472	11.3		65 82 43 95 98 97 97 33 91 97	GAQASLAGAK	CID
VDSLQKFWR	9	80	589.789	2	17.4	1177.62	-51.9		31 48 89 97 89 88 96 85 98	VDSLQKFWR	CID
KLDPNPTLC(+57.02)DEFKADEKKFWGK	22	80	534.073	5	25.84	2665.32	4	Carbamidomethylation	37 57 87 78 82 70 93 97 96 95 94 88 88 79 84 88 76 80 74 73 56 84	KLDPNPTLC(+57.02)DEFKADEKKFWGK	CID
QKVQELQDKLDLTFLAGEYR	20	80	798.786	3	22.66	2393.26	32.1		75 92 93 94 98 94 88 94 97 92 89 79 22 21 73 65 57 94 77 100	QKVQELQDKLDLTFLAGEYR	CID
RSQPLLKK	8	80	485.274	2	12.66	968.613	-82.1		81 83 74 39 90 95 90 86	RSQPLLKK	CID
FFKKFKFKEGEEK	13	80	846.504	2	19.64	1690.91	50.7		79 86 93 95 90 78 76 86 69 50 79 66 89	FFKKFKFKEGEEK	CID
KPVTDAENC(+57.02)HALR	13	80	504.254	3	8.57	1509.74	2.3	Carbamidomethylation	92 89 93 90 91 84 89 71 84 67 79 48 71	KPVTDAENC(+57.02)HALR	CID
KFLFAGVAHLTK	12	80	444.607	3	19.49	1330.78	16.9		90 95 95 91 86 73 82 38 22 97 99 99	KFLFAGVAHLTK	CID
KLEC(+57.02)ADAK	8	80	467.71	2	11.99	933.459	-57.4	Carbamidomethylation	84 96 97 92 65 61 70 79	KLEC(+57.02)ADAK	CID
KFLLGSFDAVVTELQKQPTESHK	23	80	868.144	3	37.87	2601.38	11.3		89 90 95 69 34 89 90 97 97 99 99 98 98 93 76 77 77 32 66 88 73 30 95	KFLLGSFDAVVTELQKQPTESHK	CID
NALFC(+57.02)MPSAWK	11	80	662.831	2	27.49	1323.61	28.7	Carbamidomethylation	73 87 98 98 93 37 70 89 84 74 83	NALFC(+57.02)MPSAWK	CID
SSLGHQER	8	80	457.219	2	11.68	912.441	-19		60 56 90 86 90 82 84 95	SSLGHQER	CID
LPLDPVAGYKEDDDGR	16	80	880.431	2	21.66	1758.84	2.8		80 34 63 68 93 97 97 87 92 88 93 84 92 88 50 81	LPLDPVAGYKEDDDGR	CID
LWYGFKNALLVR	12	80	740.412	2	56.25	1478.84	-20.9		79 82 86 83 91 89 86 89 90 87 33 69	LWYGFKNALLVR	CID
TMKNMC(+57.02)R	7	80	470.713	2	8.71	939.409	3.5	Carbamidomethylation	91 71 82 77 55 90 95	TMKNMC(+57.02)R	CID
LAKADASVAR	10	80	501.302	2	51.46	1000.57	23.8		55 69 87 97 93 80 84 70 76 93	LAKADASVAR	CID
RLQGHAVQETDDTSHQHAASAMK	23	80	504.434	5	10.8	2517.18	-17.3		96 99 92 25 29 84 88 97 100 99 99 98 95 95 91 91 49 80 92 56 76 24 96	RLQGHAVQETDDTSHQHAASAMK	CID
ALGWDVR	7	80	408.712	2	7.71	815.429	-22.9		88 92 71 75 88 65 84	ALGWDVR	CID
LSQQFPK	7	80	424.254	2	9.8	846.46	38.9		89 90 77 40 86 88 93	LSQQFPK	CID
KNC(+57.02)DQEFKLGEYGFKNELLVR	21	80	863.097	3	27.24	2586.29	-8.3	Carbamidomethylation	89 85 95 97 89 55 35 62 39 20 98 97 94 95 88 82 91 92 94 93 98	KNC(+57.02)DQEFKLGEYGFKNELLVR	CID
TSDLLNQHLC(+57.02)AVMGK	15	80	843.936	2	21.81	1685.82	20.5	Carbamidomethylation	25 27 49 95 97 89 88 86 98 97 95 96 82 90 93	TSDLLNQHLC(+57.02)AVMGK	CID
VQSTLTSR	8	80	446.248	2	4.99	890.482	-1.3		91 90 95 90 94 88 31 62	VQSTLTSR	CID
DPTEQAALAAVDYLNKHLPR	20	80	556.298	4	30.28	2221.15	6.6		38 21 37 88 45 80 98 99 99 97 94 97 90 90 79 83 82 95 95 99	DPTEQAALAAVDYLNKHLPR	CID
GPTQEFK	7	80	403.701	2	7.86	805.397	-11.2		91 93 95 50 63 85 84	GPTQEFK	CID
RLQGHAVQETDDTSHQAEAC(+57.02)HK	22	80	630.293	4	10.61	2517.14	1.4	Carbamidomethylation	91 98 78 68 82 93 98 97 99 96 96 95 92 88 82 82 25 39 75 82 37 68	RLQGHAVQETDDTSHQAEAC(+57.02)HK	CID
SLFTDVVAESRLFHC(+57.02)VSFTLPR	22	80	861.125	3	34.16	2580.32	14.8	Carbamidomethylation	43 59 97 98 99 99 97 93 97 51 59 96 94 89 91 87 78 73 43 46 79 96	SLFTDVVAESRLFHC(+57.02)VSFTLPR	CID
DMGTQPESER	10	80	575.24	2	4.31	1148.48	-10.7		57 21 51 94 88 97 99 95 98 99	DMGTQPESER	CID
LVGGC(+57.02)VSQPHSSVPWQVREAR	21	80	470.655	5	22.62	2348.18	23.9	Carbamidomethylation	97 96 90 85 91 92 89 86 89 89 90 82 76 74 75 70 70 79 41 26 93	LVGGC(+57.02)VSQPHSSVPWQVREAR	CID
QLKKDNALVELLKHKPK	17	80	668.096	3	16.73	2001.21	27.9		30 41 89 79 83 72 73 86 88 98 97 93 88 78 88 95 80	QLKKDNALVELLKHKPK	CID
SPLFVANAQFKEK	13	80	739.912	2	23.5	1477.79	10.6		86 85 98 97 93 81 70 80 56 73 73 66 82	SPLFVANAQFKEK	CID
C(+57.02)C(+57.02)AAKDDEAC(+57.02)FAVEGPK	17	80	643.278	3	15.49	1926.79	11.1	Carbamidomethylation	92 92 96 85 57 51 63 92 90 90 88 76 75 89 62 77 84	C(+57.02)C(+57.02)AAKDDEAC(+57.02)FAVEGPK	CID
RWGLSGQPR	9	80	528.789	2	11.2	1055.56	1.4		90 84 76 94 65 35 88 90 98	RWGLSGQPR	CID
WC(+57.02)TLSTHEANKC(+57.02)AYGAVENVLR	22	80	516.653	5	18.06	2578.21	8.1	Carbamidomethylation	85 95 97 97 95 95 95 99 92 86 90 94 89 52 9 18 66 82 68 74 87 96	WC(+57.02)TLSTHEANKC(+57.02)AYGAVENVLR	CID
VAPLPLHR	8	80	451.785	2	23.72	901.55	6.1		39 46 94 95 89 94 84 98	VAPLPLHR	CID
LC(+57.02)VLHEKTAFESK	13	80	781.413	2	14.35	1560.8	9.8	Carbamidomethylation	90 88 95 99 97 98 95 86 82 65 46 25 72	LC(+57.02)VLHEKTAFESK	CID
DNQVADESHAGC(+57.02)EK	14	80	780.3	2	13.11	1558.63	-29.2	Carbamidomethylation	45 35 27 90 97 99 97 94 95 89 69 92 96 93	DNQVADESHAGC(+57.02)EK	CID
KVPQVSTPPVVEVSR	15	80	541.318	3	21.08	1620.92	7.4		85 90 77 85 95 87 86 75 26 37 95 97 86 83 94	KVPQVSTPPVVEVSR	CID
KPQAALLHFPHVHYSK	16	80	937.027	2	23.65	1872.02	12.9		84 26 26 31 85 98 98 92 91 88 90 93 88 95 95 97	KPQAALLHFPHVHYSK	CID
FMETAYQPLK	10	80	614.303	2	17.02	1226.6	-7.2		86 77 99 91 85 61 49 65 90 95	FMETAYQPLK	CID
QPC(+57.02)DQFEK	8	80	526.215	2	9.67	1050.44	-27.7	Carbamidomethylation	31 32 96 98 91 96 98 97	QPC(+57.02)DQFEK	CID

## Sheet: caerin1.9_proteins
Accession	-10lgP	Coverage (%)	#Peptides	#Unique	PTM	Avg. Mass	Description
sp|P01023|A2MG_HUMAN	170.75	5	11	9	Acetylation (K); Pyro-glu from Q	163290	Alpha-2-macroglobulin OS=Homo sapiens GN=A2M PE=1 SV=3
sp|P02765|FETUA_HUMAN	166.05	10	10	3	Carbamidomethylation; Acetylation (K); Pyro-glu from Q	39325	Alpha-2-HS-glycoprotein OS=Homo sapiens GN=AHSG PE=1 SV=1
sp|P02771|FETA_HUMAN	172.41	10	9	9	Carbamidomethylation; Deamidation (NQ); Oxidation (M)	68678	Alpha-fetoprotein OS=Homo sapiens GN=AFP PE=1 SV=1
tr|J3KMX3|J3KMX3_HUMAN	171.14	10	9	9	Carbamidomethylation; Deamidation (NQ); Oxidation (M)	70450	Alpha-fetoprotein OS=Homo sapiens GN=AFP PE=1 SV=1
tr|A0A0C4DGB6|A0A0C4DGB6_HUMAN	154.9	16	9	2	Carbamidomethylation; Acetylation (K); Deamidation (NQ)	69227	Serum albumin OS=Homo sapiens GN=ALB PE=1 SV=1
sp|P02768|ALBU_HUMAN	154.9	15	9	2	Carbamidomethylation; Acetylation (K); Deamidation (NQ)	69367	Serum albumin OS=Homo sapiens GN=ALB PE=1 SV=2
tr|C9JV77|C9JV77_HUMAN	137.56	12	8	1	Carbamidomethylation; Pyro-glu from Q	39412	Alpha-2-HS-glycoprotein OS=Homo sapiens GN=AHSG PE=1 SV=1
tr|H0YA55|H0YA55_HUMAN	152.7	16	8	1	Carbamidomethylation; Acetylation (K); Deamidation (NQ)	51578	Serum albumin (Fragment) OS=Homo sapiens GN=ALB PE=1 SV=1
tr|D6RHD5|D6RHD5_HUMAN	152.7	16	8	1	Carbamidomethylation; Acetylation (K); Deamidation (NQ)	52059	Serum albumin OS=Homo sapiens GN=ALB PE=1 SV=1
tr|B7WNR0|B7WNR0_HUMAN	152.7	15	8	1	Carbamidomethylation; Acetylation (K); Deamidation (NQ)	56212	Serum albumin OS=Homo sapiens GN=ALB PE=1 SV=1
sp|P69905|HBA_HUMAN	161.81	38	6	6		15258	Hemoglobin subunit alpha OS=Homo sapiens GN=HBA1 PE=1 SV=2
tr|E7EQB2|E7EQB2_HUMAN	141.97	5	6	5	Carbamidomethylation	76626	Lactotransferrin (Fragment) OS=Homo sapiens GN=LTF PE=1 SV=1
tr|E7ER44|E7ER44_HUMAN	141.97	5	6	5	Carbamidomethylation	77970	Lactotransferrin OS=Homo sapiens GN=LTF PE=1 SV=1
sp|P02788|TRFL_HUMAN	141.97	5	6	5	Carbamidomethylation	78182	Lactotransferrin OS=Homo sapiens GN=LTF PE=1 SV=6
sp|P02774|VTDB_HUMAN	126.95	10	6	6	Carbamidomethylation; Deamidation (NQ)	52964	Vitamin D-binding protein OS=Homo sapiens GN=GC PE=1 SV=1
tr|D6RF35|D6RF35_HUMAN	126.95	10	6	6	Carbamidomethylation; Deamidation (NQ)	53021	Vitamin D-binding protein OS=Homo sapiens GN=GC PE=1 SV=1
tr|Q5T985|Q5T985_HUMAN	126.36	5	6	6		105216	Inter-alpha-trypsin inhibitor heavy chain H2 OS=Homo sapiens GN=ITIH2 PE=1 SV=1
tr|A0A087WTE1|A0A087WTE1_HUMAN	126.36	5	6	6		106657	Inter-alpha-trypsin inhibitor heavy chain H2 OS=Homo sapiens GN=ITIH2 PE=1 SV=1
sp|P19823|ITIH2_HUMAN	126.36	5	6	6		106463	Inter-alpha-trypsin inhibitor heavy chain H2 OS=Homo sapiens GN=ITIH2 PE=1 SV=2
sp|P02787|TRFE_HUMAN	116.49	6	6	5	Carbamidomethylation	77064	Serotransferrin OS=Homo sapiens GN=TF PE=1 SV=3
sp|P00747|PLMN_HUMAN	117.69	5	5	5	Carbamidomethylation; Amidation	90569	Plasminogen OS=Homo sapiens GN=PLG PE=1 SV=2
tr|A0A087WWT3|A0A087WWT3_HUMAN	128.45	17	5	1	Carbamidomethylation; Acetylation (K); Deamidation (NQ)	45148	Serum albumin OS=Homo sapiens GN=ALB PE=1 SV=1
tr|G3V1N2|G3V1N2_HUMAN	126.14	31	4	4		11948	HCG1745306 isoform CRA_a OS=Homo sapiens GN=HBA2 PE=1 SV=1
tr|Q5VY30|Q5VY30_HUMAN	129.33	16	4	4	Carbamidomethylation; Pyro-glu from Q	22974	Retinol binding protein 4 plasma isoform CRA_b OS=Homo sapiens GN=RBP4 PE=1 SV=2
tr|A0A0C4DGV7|A0A0C4DGV7_HUMAN	129.33	16	4	4	Carbamidomethylation; Pyro-glu from Q	22868	Retinol-binding protein 4 OS=Homo sapiens GN=RBP4 PE=1 SV=1
sp|P02753|RET4_HUMAN	129.33	15	4	4	Carbamidomethylation; Pyro-glu from Q	23010	Retinol-binding protein 4 OS=Homo sapiens GN=RBP4 PE=1 SV=3
tr|D6RBJ7|D6RBJ7_HUMAN	109.26	8	4	4	Carbamidomethylation; Deamidation (NQ)	38797	Vitamin D-binding protein OS=Homo sapiens GN=GC PE=1 SV=1
tr|Q5T987|Q5T987_HUMAN	100.28	13	4	4		26821	Inter-alpha-trypsin inhibitor heavy chain H2 (Fragment) OS=Homo sapiens GN=ITIH2 PE=1 SV=1
sp|Q06033|ITIH3_HUMAN	124.84	3	4	4		99849	Inter-alpha-trypsin inhibitor heavy chain H3 OS=Homo sapiens GN=ITIH3 PE=1 SV=2
tr|A0A087WW43|A0A087WW43_HUMAN	124.84	4	4	4		75078	Inter-alpha-trypsin inhibitor heavy chain H3 OS=Homo sapiens GN=ITIH3 PE=1 SV=1
tr|E7ET33|E7ET33_HUMAN	124.84	4	4	4		78130	Inter-alpha-trypsin inhibitor heavy chain H3 OS=Homo sapiens GN=ITIH3 PE=1 SV=1
tr|C9JVG0|C9JVG0_HUMAN	94.43	16	4	4	Carbamidomethylation	14691	Serotransferrin (Fragment) OS=Homo sapiens GN=TF PE=1 SV=1
sp|P23142|FBLN1_HUMAN	89.14	5	4	4	Carbamidomethylation	77214	Fibulin-1 OS=Homo sapiens GN=FBLN1 PE=1 SV=4
tr|B1AHL2|B1AHL2_HUMAN	89.14	5	4	4	Carbamidomethylation	78329	Fibulin-1 OS=Homo sapiens GN=FBLN1 PE=1 SV=1
sp|P63267|ACTH_HUMAN	88.86	9	3	1		41877	Actin gamma-enteric smooth muscle OS=Homo sapiens GN=ACTG2 PE=1 SV=1
sp|P68032|ACTC_HUMAN	88.86	8	3	1		42019	Actin alpha cardiac muscle 1 OS=Homo sapiens GN=ACTC1 PE=1 SV=1
sp|P68133|ACTS_HUMAN	88.86	8	3	1		42051	Actin alpha skeletal muscle OS=Homo sapiens GN=ACTA1 PE=1 SV=1
sp|P62736|ACTA_HUMAN	88.86	8	3	1		42009	Actin aortic smooth muscle OS=Homo sapiens GN=ACTA2 PE=1 SV=1
tr|A6NL76|A6NL76_HUMAN	88.86	13	3	1		28165	Actin alpha skeletal muscle OS=Homo sapiens GN=ACTA1 PE=1 SV=3
sp|P63261|ACTG_HUMAN	88.86	9	3	1		41793	Actin cytoplasmic 2 OS=Homo sapiens GN=ACTG1 PE=1 SV=1
sp|P60709|ACTB_HUMAN	88.86	9	3	1		41737	Actin cytoplasmic 1 OS=Homo sapiens GN=ACTB PE=1 SV=1
tr|C9JTX5|C9JTX5_HUMAN	83.6	40	3	1		8534	Actin cytoplasmic 1 (Fragment) OS=Homo sapiens GN=ACTB PE=1 SV=1
tr|C9JUM1|C9JUM1_HUMAN	83.6	32	3	1		10979	Actin cytoplasmic 1 (Fragment) OS=Homo sapiens GN=ACTB PE=1 SV=1
tr|C9JZR7|C9JZR7_HUMAN	83.6	31	3	1		11394	Actin cytoplasmic 1 (Fragment) OS=Homo sapiens GN=ACTB PE=1 SV=7
tr|F8WB63|F8WB63_HUMAN	83.6	30	3	1		11403	Actin gamma-enteric smooth muscle OS=Homo sapiens GN=ACTG2 PE=1 SV=1
tr|B8ZZJ2|B8ZZJ2_HUMAN	83.6	27	3	1		12969	Actin gamma-enteric smooth muscle OS=Homo sapiens GN=ACTG2 PE=1 SV=1
tr|G5E9R0|G5E9R0_HUMAN	83.6	26	3	1		13859	Actin cytoplasmic 1 OS=Homo sapiens GN=ACTB PE=1 SV=1
tr|K7EM38|K7EM38_HUMAN	83.6	24	3	1		14522	Actin cytoplasmic 2 (Fragment) OS=Homo sapiens GN=ACTG1 PE=1 SV=1
tr|C9JFL5|C9JFL5_HUMAN	83.6	22	3	1		16271	Actin gamma-enteric smooth muscle (Fragment) OS=Homo sapiens GN=ACTG2 PE=1 SV=7
tr|F6QUT6|F6QUT6_HUMAN	83.6	21	3	1		16759	Actin aortic smooth muscle (Fragment) OS=Homo sapiens GN=ACTA2 PE=1 SV=1
tr|F6UVQ4|F6UVQ4_HUMAN	83.6	21	3	1		16759	Actin aortic smooth muscle (Fragment) OS=Homo sapiens GN=ACTA2 PE=1 SV=1
tr|E7EVS6|E7EVS6_HUMAN	83.6	20	3	1		17975	Actin cytoplasmic 1 (Fragment) OS=Homo sapiens GN=ACTB PE=1 SV=7
tr|I3L3R2|I3L3R2_HUMAN	83.6	20	3	1		18032	Actin cytoplasmic 2 (Fragment) OS=Homo sapiens GN=ACTG1 PE=1 SV=1
tr|J3KT65|J3KT65_HUMAN	83.6	16	3	1		21804	Actin cytoplasmic 2 OS=Homo sapiens GN=ACTG1 PE=1 SV=1
tr|I3L1U9|I3L1U9_HUMAN	83.6	15	3	1		23845	Actin cytoplasmic 2 (Fragment) OS=Homo sapiens GN=ACTG1 PE=1 SV=1
tr|I3L3I0|I3L3I0_HUMAN	83.6	15	3	1		23845	Actin cytoplasmic 2 (Fragment) OS=Homo sapiens GN=ACTG1 PE=1 SV=1
tr|G3XAP6|G3XAP6_HUMAN	83.94	4	3	1	Carbamidomethylation; Acetylation (K)	79697	Cartilage oligomeric matrix protein OS=Homo sapiens GN=COMP PE=1 SV=1
sp|P49747|COMP_HUMAN	83.94	4	3	1	Carbamidomethylation; Acetylation (K)	82861	Cartilage oligomeric matrix protein OS=Homo sapiens GN=COMP PE=1 SV=2
tr|G3V2B9|G3V2B9_HUMAN	65.82	9	3	3		11798	Alpha-1-antitrypsin (Fragment) OS=Homo sapiens GN=SERPINA1 PE=1 SV=1
tr|A0A0G2JRN3|A0A0G2JRN3_HUMAN	65.82	3	3	3		40235	Alpha-1-antitrypsin OS=Homo sapiens GN=SERPINA1 PE=1 SV=1
tr|A0A024R6I7|A0A024R6I7_HUMAN	65.82	2	3	3		46709	Alpha-1-antitrypsin OS=Homo sapiens GN=SERPINA1 PE=1 SV=1
sp|P01009|A1AT_HUMAN	65.82	2	3	3		46737	Alpha-1-antitrypsin OS=Homo sapiens GN=SERPINA1 PE=1 SV=3
tr|F8W7L3|F8W7L3_HUMAN	66.81	5	2	2		18724	Alpha-2-macroglobulin (Fragment) OS=Homo sapiens GN=A2M PE=1 SV=1
sp|P02008|HBAZ_HUMAN	68.24	6	2	2		15637	Hemoglobin subunit zeta OS=Homo sapiens GN=HBZ PE=1 SV=2
sp|P04732|MT1E_HUMAN	95.48	33	2	1	Carbamidomethylation	6014	Metallothionein-1E OS=Homo sapiens GN=MT1E PE=1 SV=1
sp|P01024|CO3_HUMAN	92.03	1	2	2		187147	Complement C3 OS=Homo sapiens GN=C3 PE=1 SV=2
sp|P02795|MT2_HUMAN	89.77	36	2	1	Carbamidomethylation	6042	Metallothionein-2 OS=Homo sapiens GN=MT2A PE=1 SV=1
tr|B1AHN3|B1AHN3_HUMAN	69.77	11	2	2	Carbamidomethylation	18394	Fibulin-1 (Fragment) OS=Homo sapiens GN=FBLN1 PE=1 SV=1
tr|B1AHM8|B1AHM8_HUMAN	69.77	10	2	2	Carbamidomethylation	19404	Fibulin-1 (Fragment) OS=Homo sapiens GN=FBLN1 PE=1 SV=1
tr|H7C1M6|H7C1M6_HUMAN	69.77	10	2	2	Carbamidomethylation	20167	Fibulin-1 (Fragment) OS=Homo sapiens GN=FBLN1 PE=1 SV=1
tr|F8W6P5|F8W6P5_HUMAN	84.93	23	2	2		9670	Hemoglobin subunit beta (Fragment) OS=Homo sapiens GN=HBB PE=1 SV=1
sp|P68871|HBB_HUMAN	84.93	14	2	2		15998	Hemoglobin subunit beta OS=Homo sapiens GN=HBB PE=1 SV=2
sp|P02749|APOH_HUMAN	73.24	3	2	2	Carbamidomethylation	38298	Beta-2-glycoprotein 1 OS=Homo sapiens GN=APOH PE=1 SV=3
tr|A0A0G2JL54|A0A0G2JL54_HUMAN	65.46	1	2	2		187715	Complement C4-B OS=Homo sapiens GN=C4B_2 PE=1 SV=1
tr|A0A140TA32|A0A140TA32_HUMAN	65.46	1	2	2		187763	Complement C4-A OS=Homo sapiens GN=C4A PE=1 SV=1
tr|A0A140TA49|A0A140TA49_HUMAN	65.46	1	2	2		187793	Complement C4-A OS=Homo sapiens GN=C4A PE=1 SV=1
tr|A0A0G2JPR0|A0A0G2JPR0_HUMAN	65.46	1	2	2		192874	Complement C4-A OS=Homo sapiens GN=C4A PE=1 SV=1
tr|A0A140TA29|A0A140TA29_HUMAN	65.46	1	2	2		187665	Complement C4-B OS=Homo sapiens GN=C4B PE=1 SV=1
tr|A0A140TA44|A0A140TA44_HUMAN	65.46	1	2	2		187659	Complement C4-A OS=Homo sapiens GN=C4A PE=1 SV=1
tr|F5GXS0|F5GXS0_HUMAN	65.46	1	2	2		187668	Complement C4-B OS=Homo sapiens GN=C4B PE=1 SV=1
sp|P0C0L4|CO4A_HUMAN	65.46	1	2	2		192784	Complement C4-A OS=Homo sapiens GN=C4A PE=1 SV=2
sp|P0C0L5|CO4B_HUMAN	65.46	1	2	2		192750	Complement C4-B OS=Homo sapiens GN=C4B PE=1 SV=2
sp|Q6ZU45|YA021_HUMAN	56.61	4	2	2		25812	Putative C-type lectin domain-containing protein LINC00083 OS=Homo sapiens GN=LINC00083 PE=5 SV=1
sp|P43652|AFAM_HUMAN	44.69	2	2	2		69069	Afamin OS=Homo sapiens GN=AFM PE=1 SV=1
tr|H7C013|H7C013_HUMAN	51.68	14	2	2	Carbamidomethylation; Deamidation (NQ)	22859	Serum albumin (Fragment) OS=Homo sapiens GN=ALB PE=1 SV=1
sp|P02656|APOC3_HUMAN	63.05	16	2	2		10852	Apolipoprotein C-III OS=Homo sapiens GN=APOC3 PE=1 SV=1
tr|B0YIW2|B0YIW2_HUMAN	63.05	14	2	2		12816	Apolipoprotein C-III OS=Homo sapiens GN=APOC3 PE=1 SV=1
tr|D6RF20|D6RF20_HUMAN	32.32	5	1	1	Carbamidomethylation	16083	Vitamin D-binding protein (Fragment) OS=Homo sapiens GN=GC PE=1 SV=1
sp|P08519|APOA_HUMAN	37.06	0	1	1	Carbamidomethylation	501323	Apolipoprotein(a) OS=Homo sapiens GN=LPA PE=1 SV=1
sp|Q02325|PLGB_HUMAN	32.21	7	1	1		10971	Plasminogen-like protein B OS=Homo sapiens GN=PLGLB1 PE=3 SV=1
sp|Q15195|PLGA_HUMAN	32.21	7	1	1		10915	Plasminogen-like protein A OS=Homo sapiens GN=PLGLA PE=2 SV=1
tr|Q5TEH5|Q5TEH5_HUMAN	32.21	5	1	1		15444	HCG2029799 isoform CRA_b OS=Homo sapiens GN=PLG PE=1 SV=1
tr|A6PVI2|A6PVI2_HUMAN	32.21	4	1	1		18746	Plasminogen (Fragment) OS=Homo sapiens GN=PLG PE=1 SV=1
tr|H3BU80|H3BU80_HUMAN	50.09	21	1	1	Carbamidomethylation	3786	Metallothionein OS=Homo sapiens GN=MT1E PE=3 SV=1
sp|Q93083|MT1L_HUMAN	50.09	13	1	1	Carbamidomethylation	6062	Metallothionein-1L OS=Homo sapiens GN=MT1L PE=2 SV=1
sp|P07438|MT1B_HUMAN	50.09	13	1	1	Carbamidomethylation	6115	Metallothionein-1B OS=Homo sapiens GN=MT1B PE=3 SV=1
sp|P04733|MT1F_HUMAN	50.09	13	1	1	Carbamidomethylation	6086	Metallothionein-1F OS=Homo sapiens GN=MT1F PE=1 SV=1
tr|B1AHM7|B1AHM7_HUMAN	55.23	6	1	1	Carbamidomethylation	15432	Fibulin-1 (Fragment) OS=Homo sapiens GN=FBLN1 PE=1 SV=1
tr|B1AHM9|B1AHM9_HUMAN	55.23	5	1	1	Carbamidomethylation	20471	Fibulin-1 (Fragment) OS=Homo sapiens GN=FBLN1 PE=1 SV=1
sp|Q562R1|ACTBL_HUMAN	46.2	3	1	1		42003	Beta-actin-like protein 2 OS=Homo sapiens GN=ACTBL2 PE=1 SV=2
tr|A8MUF7|A8MUF7_HUMAN	60.97	11	1	1		9470	Hemoglobin subunit epsilon (Fragment) OS=Homo sapiens GN=HBE1 PE=1 SV=1
tr|E9PEW8|E9PEW8_HUMAN	60.97	10	1	1		11346	Hemoglobin subunit delta (Fragment) OS=Homo sapiens GN=HBD PE=1 SV=1
tr|E9PBW4|E9PBW4_HUMAN	60.97	7	1	1		15319	Hemoglobin subunit gamma-2 OS=Homo sapiens GN=HBG2 PE=1 SV=1
tr|E9PFT6|E9PFT6_HUMAN	60.97	7	1	1		15420	Hemoglobin subunit delta OS=Homo sapiens GN=HBD PE=1 SV=1
sp|P69891|HBG1_HUMAN	60.97	7	1	1		16140	Hemoglobin subunit gamma-1 OS=Homo sapiens GN=HBG1 PE=1 SV=2
sp|P02100|HBE_HUMAN	60.97	7	1	1		16203	Hemoglobin subunit epsilon OS=Homo sapiens GN=HBE1 PE=1 SV=2
sp|P02042|HBD_HUMAN	60.97	7	1	1		16055	Hemoglobin subunit delta OS=Homo sapiens GN=HBD PE=1 SV=2
sp|P69892|HBG2_HUMAN	60.97	7	1	1		16126	Hemoglobin subunit gamma-2 OS=Homo sapiens GN=HBG2 PE=1 SV=2
tr|E9PIT3|E9PIT3_HUMAN	72.88	2	1	1	Carbamidomethylation	65409	Prothrombin OS=Homo sapiens GN=F2 PE=1 SV=1
sp|P00734|THRB_HUMAN	72.88	1	1	1	Carbamidomethylation	70037	Prothrombin OS=Homo sapiens GN=F2 PE=1 SV=2
tr|C9JV37|C9JV37_HUMAN	56.92	3	1	1	Carbamidomethylation	35932	Prothrombin (Fragment) OS=Homo sapiens GN=F2 PE=1 SV=1
tr|A0A0G2JPA8|A0A0G2JPA8_HUMAN	62.02	3	1	1	Carbamidomethylation	47937	Alpha-2-antiplasmin OS=Homo sapiens GN=SERPINF2 PE=1 SV=1
sp|P08697|A2AP_HUMAN	62.02	2	1	1	Carbamidomethylation	54566	Alpha-2-antiplasmin OS=Homo sapiens GN=SERPINF2 PE=1 SV=3
tr|A0A0J9YY65|A0A0J9YY65_HUMAN	62.02	4	1	1	Carbamidomethylation	27853	Alpha-2-antiplasmin (Fragment) OS=Homo sapiens GN=SERPINF2 PE=1 SV=1
tr|C9JMH6|C9JMH6_HUMAN	62.02	4	1	1	Carbamidomethylation	27823	Alpha-2-antiplasmin (Fragment) OS=Homo sapiens GN=SERPINF2 PE=1 SV=1
sp|P01042|KNG1_HUMAN	53.71	1	1	1		71957	Kininogen-1 OS=Homo sapiens GN=KNG1 PE=1 SV=2
tr|A0A0G2JH38|A0A0G2JH38_HUMAN	46.15	1	1	1	Carbamidomethylation	65770	Complement factor B (Fragment) OS=Homo sapiens GN=CFB PE=3 SV=1
sp|P00751|CFAB_HUMAN	46.15	1	1	1	Carbamidomethylation	85533	Complement factor B OS=Homo sapiens GN=CFB PE=1 SV=2
tr|E7ETN3|E7ETN3_HUMAN	46.15	1	1	1	Carbamidomethylation	124016	Uncharacterized protein OS=Homo sapiens PE=3 SV=1
tr|B4E1Z4|B4E1Z4_HUMAN	46.15	1	1	1	Carbamidomethylation	140942	Uncharacterized protein OS=Homo sapiens PE=1 SV=1
tr|C9JRT3|C9JRT3_HUMAN	36.68	6	1	1	Carbamidomethylation	16094	Complement factor B (Fragment) OS=Homo sapiens GN=CFB PE=4 SV=1
tr|E9PLL4|E9PLL4_HUMAN	44.68	2	1	1		52811	Oxysterols receptor LXR-alpha OS=Homo sapiens GN=NR1H3 PE=1 SV=1
tr|E9PPA1|E9PPA1_HUMAN	44.68	6	1	1		18551	Oxysterols receptor LXR-alpha (Fragment) OS=Homo sapiens GN=NR1H3 PE=1 SV=1
tr|C9JCS0|C9JCS0_HUMAN	44.68	5	1	1		22375	Oxysterols receptor LXR-alpha (Fragment) OS=Homo sapiens GN=NR1H3 PE=1 SV=1
tr|C9JBS2|C9JBS2_HUMAN	44.68	5	1	1		23099	Oxysterols receptor LXR-alpha (Fragment) OS=Homo sapiens GN=NR1H3 PE=1 SV=1
tr|E9PID2|E9PID2_HUMAN	44.68	3	1	1		34137	Oxysterols receptor LXR-alpha OS=Homo sapiens GN=NR1H3 PE=1 SV=1
tr|B5MBY7|B5MBY7_HUMAN	44.68	3	1	1		38851	Oxysterols receptor LXR-alpha OS=Homo sapiens GN=NR1H3 PE=1 SV=1
sp|Q13133|NR1H3_HUMAN	44.68	2	1	1		50396	Oxysterols receptor LXR-alpha OS=Homo sapiens GN=NR1H3 PE=1 SV=2
tr|B4DXU5|B4DXU5_HUMAN	44.68	2	1	1		51113	Oxysterols receptor LXR-alpha OS=Homo sapiens GN=NR1H3 PE=1 SV=1
sp|P07996|TSP1_HUMAN	37.31	1	1	1		129383	Thrombospondin-1 OS=Homo sapiens GN=THBS1 PE=1 SV=2
sp|P02649|APOE_HUMAN	36.59	3	1	1		36154	Apolipoprotein E OS=Homo sapiens GN=APOE PE=1 SV=1
tr|A8MZB2|A8MZB2_HUMAN	36.34	5	1	1		18857	N-acetyltransferase 5 (ARD1 homolog S. cerevisiae) isoform CRA_a OS=Homo sapiens GN=NAA20 PE=1 SV=1
sp|P61599|NAA20_HUMAN	36.34	4	1	1		20368	N-alpha-acetyltransferase 20 OS=Homo sapiens GN=NAA20 PE=1 SV=1
sp|P02748|CO9_HUMAN	35.85	2	1	1		63173	Complement component C9 OS=Homo sapiens GN=C9 PE=1 SV=2
sp|P02452|CO1A1_HUMAN	32.62	1	1	1		138942	Collagen alpha-1(I) chain OS=Homo sapiens GN=COL1A1 PE=1 SV=5
tr|H7C0L5|H7C0L5_HUMAN	32.56	1	1	1		80072	Inter-alpha-trypsin inhibitor heavy chain H4 (Fragment) OS=Homo sapiens GN=ITIH4 PE=1 SV=1
sp|Q14624|ITIH4_HUMAN	32.56	1	1	1		103357	Inter-alpha-trypsin inhibitor heavy chain H4 OS=Homo sapiens GN=ITIH4 PE=1 SV=4
tr|B7ZKJ8|B7ZKJ8_HUMAN	32.56	1	1	1		103881	ITIH4 protein OS=Homo sapiens GN=ITIH4 PE=1 SV=1
tr|A6XGL3|A6XGL3_HUMAN	29.24	3	1	1		25399	Protease serine 1 OS=Homo sapiens GN=PRSS1 PE=1 SV=1
sp|P07477|TRY1_HUMAN	29.24	3	1	1		26558	Trypsin-1 OS=Homo sapiens GN=PRSS1 PE=1 SV=1
tr|E7EQ64|E7EQ64_HUMAN	29.24	3	1	1		28123	Trypsin-1 OS=Homo sapiens GN=PRSS1 PE=1 SV=1
tr|A0A087WWD8|A0A087WWD8_HUMAN	29.24	1	1	1		61082	Transmembrane protease serine 13 OS=Homo sapiens GN=TMPRSS13 PE=1 SV=1
tr|E9PRA0|E9PRA0_HUMAN	29.24	1	1	1		61494	Transmembrane protease serine 13 OS=Homo sapiens GN=TMPRSS13 PE=1 SV=1
tr|J3KQC6|J3KQC6_HUMAN	29.24	1	1	1		63167	Transmembrane protease serine 13 OS=Homo sapiens GN=TMPRSS13 PE=1 SV=1
sp|Q9BYE2|TMPSD_HUMAN	29.24	1	1	1		63153	Transmembrane protease serine 13 OS=Homo sapiens GN=TMPRSS13 PE=2 SV=4
tr|H0YMA2|H0YMA2_HUMAN	29.18	6	1	1		12399	Tropomodulin-2 (Fragment) OS=Homo sapiens GN=TMOD2 PE=1 SV=1
tr|G5EA42|G5EA42_HUMAN	29.18	2	1	1		34492	Tropomodulin 2 (Neuronal) isoform CRA_a OS=Homo sapiens GN=TMOD2 PE=1 SV=1
sp|Q9NZR1|TMOD2_HUMAN	29.18	2	1	1		39595	Tropomodulin-2 OS=Homo sapiens GN=TMOD2 PE=1 SV=1
sp|Q03181|PPARD_HUMAN	28.73	2	1	1		49903	Peroxisome proliferator-activated receptor delta OS=Homo sapiens GN=PPARD PE=1 SV=1
sp|Q07869|PPARA_HUMAN	28.73	1	1	1		52225	Peroxisome proliferator-activated receptor alpha OS=Homo sapiens GN=PPARA PE=1 SV=2
tr|G3V3A0|G3V3A0_HUMAN	27.67	4	1	1		23406	Alpha-1-antichymotrypsin OS=Homo sapiens GN=SERPINA3 PE=1 SV=1
sp|P01011|AACT_HUMAN	27.67	2	1	1		47651	Alpha-1-antichymotrypsin OS=Homo sapiens GN=SERPINA3 PE=1 SV=2
sp|Q8NGI9|OR5A2_HUMAN	27.09	3	1	1		36016	Olfactory receptor 5A2 OS=Homo sapiens GN=OR5A2 PE=2 SV=1
sp|O60391|NMD3B_HUMAN	28.41	1	1	1		112992	Glutamate receptor ionotropic NMDA 3B OS=Homo sapiens GN=GRIN3B PE=2 SV=2
tr|K7ERJ6|K7ERJ6_HUMAN	25.98	1	1	1		99649	Zinc finger SWIM domain-containing protein 4 (Fragment) OS=Homo sapiens GN=ZSWIM4 PE=4 SV=1
sp|Q9H7M6|ZSWM4_HUMAN	25.98	1	1	1		110138	Zinc finger SWIM domain-containing protein 4 OS=Homo sapiens GN=ZSWIM4 PE=2 SV=3
tr|A0A087WTM7|A0A087WTM7_HUMAN	23.8	0	1	1	Carbamidomethylation	489838	Apolipoprotein B-100 OS=Homo sapiens GN=APOB PE=1 SV=1
sp|P04114|APOB_HUMAN	23.8	0	1	1	Carbamidomethylation	515611	Apolipoprotein B-100 OS=Homo sapiens GN=APOB PE=1 SV=2
sp|Q96EK5|KBP_HUMAN	23.23	1	1	1		71814	KIF1-binding protein OS=Homo sapiens GN=KIF1BP PE=1 SV=1
sp|Q58DX5|NADL2_HUMAN	22.59	3	1	1		88682	Inactive N-acetylated-alpha-linked acidic dipeptidase-like protein 2 OS=Homo sapiens GN=NAALADL2 PE=1 SV=3
sp|Q96PQ0|SORC2_HUMAN	22.34	1	1	1		128151	VPS10 domain-containing receptor SorCS2 OS=Homo sapiens GN=SORCS2 PE=1 SV=3
tr|B5MED8|B5MED8_HUMAN	22.34	1	1	1		110591	VPS10 domain-containing receptor SorCS2 OS=Homo sapiens GN=SORCS2 PE=1 SV=4
sp|P80297|MT1X_HUMAN	67.02	20	1	1	Carbamidomethylation	6068	Metallothionein-1X OS=Homo sapiens GN=MT1X PE=1 SV=1
sp|Q8N339|MT1M_HUMAN	67.02	20	1	1	Carbamidomethylation	6110	Metallothionein-1M OS=Homo sapiens GN=MT1M PE=3 SV=2
sp|P13640|MT1G_HUMAN	67.02	19	1	1	Carbamidomethylation	6141	Metallothionein-1G OS=Homo sapiens GN=MT1G PE=1 SV=2
tr|E7ES19|E7ES19_HUMAN	37.9	1	1	1		96006	Thrombospondin-4 OS=Homo sapiens GN=THBS4 PE=1 SV=1
sp|P35443|TSP4_HUMAN	37.9	1	1	1		105869	Thrombospondin-4 OS=Homo sapiens GN=THBS4 PE=1 SV=2
tr|F8WAS2|F8WAS2_HUMAN	33.21	5	1	1	Carbamidomethylation	23437	Inter-alpha-trypsin inhibitor heavy chain H1 OS=Homo sapiens GN=ITIH1 PE=1 SV=1
sp|P19827|ITIH1_HUMAN	33.21	1	1	1	Carbamidomethylation	101389	Inter-alpha-trypsin inhibitor heavy chain H1 OS=Homo sapiens GN=ITIH1 PE=1 SV=3
sp|P29622|KAIN_HUMAN	29.37	2	1	1		48542	Kallistatin OS=Homo sapiens GN=SERPINA4 PE=1 SV=3
sp|Q9UM47|NOTC3_HUMAN	26.11	0	1	1	Carbamidomethylation	243629	Neurogenic locus notch homolog protein 3 OS=Homo sapiens GN=NOTCH3 PE=1 SV=2
tr|M0R3C9|M0R3C9_HUMAN	26.11	1	1	1	Carbamidomethylation	134318	Neurogenic locus notch homolog protein 3 (Fragment) OS=Homo sapiens GN=NOTCH3 PE=1 SV=1

## Sheet: caerin1.9_peps
Protein Accession	Peptide	Unique	-10lgP	Mass	ppm	m/z	z	RT	#Spec	PTM
sp|P02771|FETA_HUMAN	R.SC(+57.02)GLFQKLGEYYLQNAFLVAYTK.K	Y	80.58	2712.36	59.3	905.182	3	36.88	7	Carbamidomethylation
tr|J3KMX3|J3KMX3_HUMAN	R.SC(+57.02)GLFQKLGEYYLQNAFLVAYTK.K	Y	80.58	2712.36	59.3	905.182	3	36.88	7	Carbamidomethylation
sp|P69905|HBA_HUMAN	K.TYFPHFDLSHGSAQVK.G	Y	76.17	1832.88	56.4	917.501	2	22.55	3
tr|G3V1N2|G3V1N2_HUMAN	K.TYFPHFDLSHGSAQVK.G	Y	76.17	1832.88	56.4	917.501	2	22.55	3
tr|A0A0C4DGB6|A0A0C4DGB6_HUMAN	K.KVPQVSTPTLVEVSR.N	N	73.91	1638.93	41.5	547.34	3	64.3	419
sp|P02768|ALBU_HUMAN	K.KVPQVSTPTLVEVSR.N	N	73.91	1638.93	41.5	547.34	3	64.3	419
tr|H0YA55|H0YA55_HUMAN	K.KVPQVSTPTLVEVSR.N	N	73.91	1638.93	41.5	547.34	3	64.3	419
tr|D6RHD5|D6RHD5_HUMAN	K.KVPQVSTPTLVEVSR.N	N	73.91	1638.93	41.5	547.34	3	64.3	419
tr|B7WNR0|B7WNR0_HUMAN	K.KVPQVSTPTLVEVSR.N	N	73.91	1638.93	41.5	547.34	3	64.3	419
tr|A0A087WWT3|A0A087WWT3_HUMAN	K.KVPQVSTPTLVEVSR.N	N	73.91	1638.93	41.5	547.34	3	64.3	419
tr|Q5VY30|Q5VY30_HUMAN	R.Q(-17.03)RQEELC(+57.02)LAR.Q	Y	73.67	1284.62	37.6	643.344	2	15.97	1	Pyro-glu from Q; Carbamidomethylation
tr|A0A0C4DGV7|A0A0C4DGV7_HUMAN	R.Q(-17.03)RQEELC(+57.02)LAR.Q	Y	73.67	1284.62	37.6	643.344	2	15.97	1	Pyro-glu from Q; Carbamidomethylation
sp|P02753|RET4_HUMAN	R.Q(-17.03)RQEELC(+57.02)LAR.Q	Y	73.67	1284.62	37.6	643.344	2	15.97	1	Pyro-glu from Q; Carbamidomethylation
sp|P04732|MT1E_HUMAN	K.SC(+57.02)C(+57.02)SC(+57.02)C(+57.02)PVGC(+57.02)AK.C	N	70.43	1444.5	41.1	723.288	2	9.02	2	Carbamidomethylation
sp|P02795|MT2_HUMAN	K.SC(+57.02)C(+57.02)SC(+57.02)C(+57.02)PVGC(+57.02)AK.C	N	70.43	1444.5	41.1	723.288	2	9.02	2	Carbamidomethylation
tr|A0A087WW43|A0A087WW43_HUMAN	K.GHVSFKPSLDQQR.S	Y	69.5	1497.77	29.8	500.278	3	14.27	2
tr|E7ET33|E7ET33_HUMAN	K.GHVSFKPSLDQQR.S	Y	69.5	1497.77	29.8	500.278	3	14.27	2
sp|Q06033|ITIH3_HUMAN	K.GHVSFKPSLDQQR.S	Y	69.5	1497.77	29.8	500.278	3	14.27	2
sp|P02771|FETA_HUMAN	K.LGEYYLQNAFLVAYTK.K	Y	67.38	1891.97	62.9	947.053	2	31.52	15
tr|J3KMX3|J3KMX3_HUMAN	K.LGEYYLQNAFLVAYTK.K	Y	67.38	1891.97	62.9	947.053	2	31.52	15
sp|P80297|MT1X_HUMAN	K.SC(+57.02)C(+57.02)SC(+57.02)C(+57.02)PVGC(+57.02)AK.C	Y	67.02	1444.5	55.8	723.299	2	8.98	2	Carbamidomethylation
sp|Q8N339|MT1M_HUMAN	K.SC(+57.02)C(+57.02)SC(+57.02)C(+57.02)PVGC(+57.02)AK.C	Y	67.02	1444.5	55.8	723.299	2	8.98	2	Carbamidomethylation
sp|P13640|MT1G_HUMAN	K.SC(+57.02)C(+57.02)SC(+57.02)C(+57.02)PVGC(+57.02)AK.C	Y	67.02	1444.5	55.8	723.299	2	8.98	2	Carbamidomethylation
sp|Q06033|ITIH3_HUMAN	K.KGHVSFKPSLDQQR.S	Y	66.56	1625.86	4.2	407.475	4	12.81	1
tr|A0A087WW43|A0A087WW43_HUMAN	K.KGHVSFKPSLDQQR.S	Y	66.56	1625.86	4.2	407.475	4	12.81	1
tr|E7ET33|E7ET33_HUMAN	K.KGHVSFKPSLDQQR.S	Y	66.56	1625.86	4.2	407.475	4	12.81	1
tr|E7EQB2|E7EQB2_HUMAN	K.C(+57.02)GLVPVLAENYK.S	Y	66.41	1361.7	39.6	681.885	2	24.92	3	Carbamidomethylation
tr|E7ER44|E7ER44_HUMAN	K.C(+57.02)GLVPVLAENYK.S	Y	66.41	1361.7	39.6	681.885	2	24.92	3	Carbamidomethylation
sp|P02788|TRFL_HUMAN	K.C(+57.02)GLVPVLAENYK.S	Y	66.41	1361.7	39.6	681.885	2	24.92	3	Carbamidomethylation
sp|P02765|FETUA_HUMAN	K.C(+57.02)DSSPDSAEDVRK.V	Y	66.12	1464.62	17.1	489.221	3	7.67	3	Carbamidomethylation
sp|P69905|HBA_HUMAN	K.VGAHAGEYGAEALER.M	Y	65.66	1528.73	22.2	510.594	3	14.62	3
sp|P00747|PLMN_HUMAN	K.KC(+57.02)QSWSSMTPHR.H	Y	65.39	1503.67	18.2	502.24	3	12.42	2	Carbamidomethylation
sp|P69905|HBA_HUMAN	K.AAWGKVGAHAGEYGAEALER.M	Y	64.6	2042	39	681.699	3	18.65	2
sp|P02765|FETUA_HUMAN	K.C(+57.02)NLLAEKQYGFC(+57.02)K.A	N	64.46	1629.76	49.1	815.929	2	18.76	2	Carbamidomethylation
tr|C9JV77|C9JV77_HUMAN	K.C(+57.02)NLLAEKQYGFC(+57.02)K.A	N	64.46	1629.76	49.1	815.929	2	18.76	2	Carbamidomethylation
sp|P01023|A2MG_HUMAN	K.MVSGFIPLKPTVK.M	N	64.36	1415.82	58	708.959	2	24.58	2
sp|P01024|CO3_HUMAN	K.KGYTQQLAFR.Q	Y	64.25	1210.65	41	606.355	2	15.68	3
sp|P01023|A2MG_HUMAN	K.ALLAYAFALAGNQDK(+42.01).R	Y	63.89	1606.84	56	804.47	2	30.57	3	Acetylation (K)
sp|P01023|A2MG_HUMAN	R.Q(-17.03)TVSWAVTPK.S	Y	63.72	1098.57	37.8	550.313	2	21.78	1	Pyro-glu from Q
sp|P02774|VTDB_HUMAN	K.GQELC(+57.02)ADYSENTFTEYKKK.L	Y	62.35	2310.05	42.4	578.544	4	17.15	1	Carbamidomethylation
tr|D6RF35|D6RF35_HUMAN	K.GQELC(+57.02)ADYSENTFTEYKKK.L	Y	62.35	2310.05	42.4	578.544	4	17.15	1	Carbamidomethylation
tr|A0A0G2JPA8|A0A0G2JPA8_HUMAN	R.LC(+57.02)QDLGPGAFR.L	Y	62.02	1232.6	33.4	617.326	2	19.05	2	Carbamidomethylation
sp|P08697|A2AP_HUMAN	R.LC(+57.02)QDLGPGAFR.L	Y	62.02	1232.6	33.4	617.326	2	19.05	2	Carbamidomethylation
tr|A0A0J9YY65|A0A0J9YY65_HUMAN	R.LC(+57.02)QDLGPGAFR.L	Y	62.02	1232.6	33.4	617.326	2	19.05	2	Carbamidomethylation
tr|C9JMH6|C9JMH6_HUMAN	R.LC(+57.02)QDLGPGAFR.L	Y	62.02	1232.6	33.4	617.326	2	19.05	2	Carbamidomethylation
sp|P02774|VTDB_HUMAN	K.LC(+57.02)DNLSTKN(+.98)SK.F	Y	61.32	1279.61	31.7	640.831	2	9.42	2	Carbamidomethylation; Deamidation (NQ)
tr|D6RF35|D6RF35_HUMAN	K.LC(+57.02)DNLSTKN(+.98)SK.F	Y	61.32	1279.61	31.7	640.831	2	9.42	2	Carbamidomethylation; Deamidation (NQ)
tr|D6RBJ7|D6RBJ7_HUMAN	K.LC(+57.02)DNLSTKN(+.98)SK.F	Y	61.32	1279.61	31.7	640.831	2	9.42	2	Carbamidomethylation; Deamidation (NQ)
sp|P02765|FETUA_HUMAN	K.C(+57.02)DSSPDSAEDVR.K	Y	61.28	1336.52	39	669.293	2	8.67	3	Carbamidomethylation
sp|P02774|VTDB_HUMAN	K.LC(+57.02)DNLSTKNSK.F	Y	60.39	1278.62	34.7	640.341	2	9.02	2	Carbamidomethylation
tr|D6RF35|D6RF35_HUMAN	K.LC(+57.02)DNLSTKNSK.F	Y	60.39	1278.62	34.7	640.341	2	9.02	2	Carbamidomethylation
tr|D6RBJ7|D6RBJ7_HUMAN	K.LC(+57.02)DNLSTKNSK.F	Y	60.39	1278.62	34.7	640.341	2	9.02	2	Carbamidomethylation
sp|P02771|FETA_HUMAN	R.VAKGYQELLEK.C	Y	60.24	1276.7	34.5	639.381	2	16.62	2
tr|J3KMX3|J3KMX3_HUMAN	R.VAKGYQELLEK.C	Y	60.24	1276.7	34.5	639.381	2	16.62	2
sp|P02771|FETA_HUMAN	K.RSC(+57.02)GLFQKLGEYYLQNAFLVAYTK.K	Y	59.07	2868.46	31.4	957.192	3	34.77	1	Carbamidomethylation
tr|J3KMX3|J3KMX3_HUMAN	K.RSC(+57.02)GLFQKLGEYYLQNAFLVAYTK.K	Y	59.07	2868.46	31.4	957.192	3	34.77	1	Carbamidomethylation
tr|Q5T985|Q5T985_HUMAN	K.VQFELHYQEVKWR.K	Y	58.77	1760.9	54.3	881.505	2	22.75	2
tr|A0A087WTE1|A0A087WTE1_HUMAN	K.VQFELHYQEVKWR.K	Y	58.77	1760.9	54.3	881.505	2	22.75	2
sp|P19823|ITIH2_HUMAN	K.VQFELHYQEVKWR.K	Y	58.77	1760.9	54.3	881.505	2	22.75	2
tr|Q5T987|Q5T987_HUMAN	K.VQFELHYQEVKWR.K	Y	58.77	1760.9	54.3	881.505	2	22.75	2
tr|Q5VY30|Q5VY30_HUMAN	K.MKYWGVASFLQK.G	Y	58.72	1456.75	43.7	729.416	2	26.92	1
tr|A0A0C4DGV7|A0A0C4DGV7_HUMAN	K.MKYWGVASFLQK.G	Y	58.72	1456.75	43.7	729.416	2	26.92	1
sp|P02753|RET4_HUMAN	K.MKYWGVASFLQK.G	Y	58.72	1456.75	43.7	729.416	2	26.92	1
sp|P02656|APOC3_HUMAN	K.DALSSVQESQVAQQAR.G	Y	58.38	1715.84	53.9	858.975	2	16.33	1
tr|B0YIW2|B0YIW2_HUMAN	K.DALSSVQESQVAQQAR.G	Y	58.38	1715.84	53.9	858.975	2	16.33	1
tr|Q5T985|Q5T985_HUMAN	K.FYNQVSTPLLR.N	Y	58.24	1336.71	41.3	669.392	2	22.98	3
tr|A0A087WTE1|A0A087WTE1_HUMAN	K.FYNQVSTPLLR.N	Y	58.24	1336.71	41.3	669.392	2	22.98	3
sp|P19823|ITIH2_HUMAN	K.FYNQVSTPLLR.N	Y	58.24	1336.71	41.3	669.392	2	22.98	3
tr|A0A087WW43|A0A087WW43_HUMAN	K.SFSGKKGHVSFKPSLDQQR.S	Y	58	2132.11	31.5	534.052	4	13.58	1
tr|E7ET33|E7ET33_HUMAN	K.SFSGKKGHVSFKPSLDQQR.S	Y	58	2132.11	31.5	534.052	4	13.58	1
sp|Q06033|ITIH3_HUMAN	K.SFSGKKGHVSFKPSLDQQR.S	Y	58	2132.11	31.5	534.052	4	13.58	1
tr|E9PIT3|E9PIT3_HUMAN	R.SGIEC(+57.02)QLWR.S	Y	56.92	1147.54	30.5	574.797	2	20.05	2	Carbamidomethylation
sp|P00734|THRB_HUMAN	R.SGIEC(+57.02)QLWR.S	Y	56.92	1147.54	30.5	574.797	2	20.05	2	Carbamidomethylation
tr|C9JV37|C9JV37_HUMAN	R.SGIEC(+57.02)QLWR.S	Y	56.92	1147.54	30.5	574.797	2	20.05	2	Carbamidomethylation
tr|E7EQB2|E7EQB2_HUMAN	K.SC(+57.02)HTAVDR.T	Y	56.62	944.413	18.4	473.223	2	3.42	2	Carbamidomethylation
tr|E7ER44|E7ER44_HUMAN	K.SC(+57.02)HTAVDR.T	Y	56.62	944.413	18.4	473.223	2	3.42	2	Carbamidomethylation
sp|P02788|TRFL_HUMAN	K.SC(+57.02)HTAVDR.T	Y	56.62	944.413	18.4	473.223	2	3.42	2	Carbamidomethylation
tr|Q5VY30|Q5VY30_HUMAN	R.QRQEELC(+57.02)LAR.Q	Y	56.17	1301.65	37.5	651.857	2	13.49	2	Carbamidomethylation
tr|A0A0C4DGV7|A0A0C4DGV7_HUMAN	R.QRQEELC(+57.02)LAR.Q	Y	56.17	1301.65	37.5	651.857	2	13.49	2	Carbamidomethylation
sp|P02753|RET4_HUMAN	R.QRQEELC(+57.02)LAR.Q	Y	56.17	1301.65	37.5	651.857	2	13.49	2	Carbamidomethylation
sp|P23142|FBLN1_HUMAN	R.C(+57.02)C(+57.02)HC(+57.02)C(+57.02)LLGR.A	Y	55.23	1234.48	32.1	618.269	2	12.14	2	Carbamidomethylation
tr|B1AHL2|B1AHL2_HUMAN	R.C(+57.02)C(+57.02)HC(+57.02)C(+57.02)LLGR.A	Y	55.23	1234.48	32.1	618.269	2	12.14	2	Carbamidomethylation
tr|B1AHN3|B1AHN3_HUMAN	R.C(+57.02)C(+57.02)HC(+57.02)C(+57.02)LLGR.A	Y	55.23	1234.48	32.1	618.269	2	12.14	2	Carbamidomethylation
tr|B1AHM8|B1AHM8_HUMAN	R.C(+57.02)C(+57.02)HC(+57.02)C(+57.02)LLGR.A	Y	55.23	1234.48	32.1	618.269	2	12.14	2	Carbamidomethylation
tr|H7C1M6|H7C1M6_HUMAN	R.C(+57.02)C(+57.02)HC(+57.02)C(+57.02)LLGR.A	Y	55.23	1234.48	32.1	618.269	2	12.14	2	Carbamidomethylation
tr|B1AHM7|B1AHM7_HUMAN	R.C(+57.02)C(+57.02)HC(+57.02)C(+57.02)LLGR.A	Y	55.23	1234.48	32.1	618.269	2	12.14	2	Carbamidomethylation
tr|B1AHM9|B1AHM9_HUMAN	R.C(+57.02)C(+57.02)HC(+57.02)C(+57.02)LLGR.A	Y	55.23	1234.48	32.1	618.269	2	12.14	2	Carbamidomethylation
sp|P69905|HBA_HUMAN	K.LRVDPVNFK.L	Y	54.96	1086.62	34.4	544.335	2	18.75	2
tr|G3V1N2|G3V1N2_HUMAN	K.LRVDPVNFK.L	Y	54.96	1086.62	34.4	544.335	2	18.75	2
sp|P02008|HBAZ_HUMAN	I.LRVDPVNFK.L	Y	54.96	1086.62	34.4	544.335	2	18.75	2
tr|E7EQB2|E7EQB2_HUMAN	R.YYGYTGAFR.C	N	54.82	1096.5	25.2	549.27	2	17.34	3
tr|E7ER44|E7ER44_HUMAN	R.YYGYTGAFR.C	N	54.82	1096.5	25.2	549.27	2	17.34	3
sp|P02788|TRFL_HUMAN	R.YYGYTGAFR.C	N	54.82	1096.5	25.2	549.27	2	17.34	3
sp|P02787|TRFE_HUMAN	G.YYGYTGAFR.C	N	54.82	1096.5	25.2	549.27	2	17.34	3
tr|A0A0C4DGB6|A0A0C4DGB6_HUMAN	K.HKPKATKEQ(+.98)LK.A	N	54.55	1307.76	-15.3	436.919	3	9.67	5	Deamidation (NQ)
sp|P02768|ALBU_HUMAN	K.HKPKATKEQ(+.98)LK.A	N	54.55	1307.76	-15.3	436.919	3	9.67	5	Deamidation (NQ)
tr|H0YA55|H0YA55_HUMAN	K.HKPKATKEQ(+.98)LK.A	N	54.55	1307.76	-15.3	436.919	3	9.67	5	Deamidation (NQ)
tr|D6RHD5|D6RHD5_HUMAN	K.HKPKATKEQ(+.98)LK.A	N	54.55	1307.76	-15.3	436.919	3	9.67	5	Deamidation (NQ)
tr|B7WNR0|B7WNR0_HUMAN	K.HKPKATKEQ(+.98)LK.A	N	54.55	1307.76	-15.3	436.919	3	9.67	5	Deamidation (NQ)
tr|A0A087WWT3|A0A087WWT3_HUMAN	K.HKPKATKEQ(+.98)LK.A	N	54.55	1307.76	-15.3	436.919	3	9.67	5	Deamidation (NQ)
tr|E7EQB2|E7EQB2_HUMAN	K.SCHTAVDR.T	Y	54.49	887.392	9.1	444.707	2	4.08	5
tr|E7ER44|E7ER44_HUMAN	K.SCHTAVDR.T	Y	54.49	887.392	9.1	444.707	2	4.08	5
sp|P02788|TRFL_HUMAN	K.SCHTAVDR.T	Y	54.49	887.392	9.1	444.707	2	4.08	5
tr|G3XAP6|G3XAP6_HUMAN	R.AVAEPGIQLKAVK.S	N	53.91	1322.79	35.7	662.427	2	18.44	1
sp|P49747|COMP_HUMAN	R.AVAEPGIQLKAVK.S	N	53.91	1322.79	35.7	662.427	2	18.44	1
sp|P01042|KNG1_HUMAN	K.RPPGFSPFR.S	Y	53.71	1059.56	26.1	530.802	2	17.74	8
sp|P63267|ACTH_HUMAN	K.AGFAGDDAPR.A	N	53.68	975.441	27	488.741	2	10.9	2
sp|P68032|ACTC_HUMAN	K.AGFAGDDAPR.A	N	53.68	975.441	27	488.741	2	10.9	2
sp|P68133|ACTS_HUMAN	K.AGFAGDDAPR.A	N	53.68	975.441	27	488.741	2	10.9	2
sp|P62736|ACTA_HUMAN	K.AGFAGDDAPR.A	N	53.68	975.441	27	488.741	2	10.9	2
tr|A6NL76|A6NL76_HUMAN	K.AGFAGDDAPR.A	N	53.68	975.441	27	488.741	2	10.9	2
sp|P63261|ACTG_HUMAN	K.AGFAGDDAPR.A	N	53.68	975.441	27	488.741	2	10.9	2
sp|P60709|ACTB_HUMAN	K.AGFAGDDAPR.A	N	53.68	975.441	27	488.741	2	10.9	2
tr|C9JTX5|C9JTX5_HUMAN	K.AGFAGDDAPR.A	N	53.68	975.441	27	488.741	2	10.9	2
tr|C9JUM1|C9JUM1_HUMAN	K.AGFAGDDAPR.A	N	53.68	975.441	27	488.741	2	10.9	2
tr|C9JZR7|C9JZR7_HUMAN	K.AGFAGDDAPR.A	N	53.68	975.441	27	488.741	2	10.9	2
tr|F8WB63|F8WB63_HUMAN	K.AGFAGDDAPR.A	N	53.68	975.441	27	488.741	2	10.9	2
tr|B8ZZJ2|B8ZZJ2_HUMAN	K.AGFAGDDAPR.A	N	53.68	975.441	27	488.741	2	10.9	2
tr|G5E9R0|G5E9R0_HUMAN	K.AGFAGDDAPR.A	N	53.68	975.441	27	488.741	2	10.9	2
tr|K7EM38|K7EM38_HUMAN	K.AGFAGDDAPR.A	N	53.68	975.441	27	488.741	2	10.9	2
tr|C9JFL5|C9JFL5_HUMAN	K.AGFAGDDAPR.A	N	53.68	975.441	27	488.741	2	10.9	2
tr|F6QUT6|F6QUT6_HUMAN	K.AGFAGDDAPR.A	N	53.68	975.441	27	488.741	2	10.9	2
tr|F6UVQ4|F6UVQ4_HUMAN	K.AGFAGDDAPR.A	N	53.68	975.441	27	488.741	2	10.9	2
tr|E7EVS6|E7EVS6_HUMAN	K.AGFAGDDAPR.A	N	53.68	975.441	27	488.741	2	10.9	2
tr|I3L3R2|I3L3R2_HUMAN	K.AGFAGDDAPR.A	N	53.68	975.441	27	488.741	2	10.9	2
tr|J3KT65|J3KT65_HUMAN	K.AGFAGDDAPR.A	N	53.68	975.441	27	488.741	2	10.9	2
tr|I3L1U9|I3L1U9_HUMAN	K.AGFAGDDAPR.A	N	53.68	975.441	27	488.741	2	10.9	2
tr|I3L3I0|I3L3I0_HUMAN	K.AGFAGDDAPR.A	N	53.68	975.441	27	488.741	2	10.9	2
tr|E7EQB2|E7EQB2_HUMAN	K.KSC(+57.02)HTAVDR.T	Y	53.53	1072.51	32.9	537.279	2	2.37	2	Carbamidomethylation
tr|E7ER44|E7ER44_HUMAN	K.KSC(+57.02)HTAVDR.T	Y	53.53	1072.51	32.9	537.279	2	2.37	2	Carbamidomethylation
sp|P02788|TRFL_HUMAN	K.KSC(+57.02)HTAVDR.T	Y	53.53	1072.51	32.9	537.279	2	2.37	2	Carbamidomethylation
tr|F8W6P5|F8W6P5_HUMAN	R.LLVVYPWTQR.F	Y	53.46	1273.72	37.6	637.89	2	27.71	4
sp|P68871|HBB_HUMAN	R.LLVVYPWTQR.F	Y	53.46	1273.72	37.6	637.89	2	27.71	4
tr|A8MUF7|A8MUF7_HUMAN	R.LLVVYPWTQR.F	Y	53.46	1273.72	37.6	637.89	2	27.71	4
tr|E9PEW8|E9PEW8_HUMAN	R.LLVVYPWTQR.F	Y	53.46	1273.72	37.6	637.89	2	27.71	4
tr|E9PBW4|E9PBW4_HUMAN	R.LLVVYPWTQR.F	Y	53.46	1273.72	37.6	637.89	2	27.71	4
tr|E9PFT6|E9PFT6_HUMAN	R.LLVVYPWTQR.F	Y	53.46	1273.72	37.6	637.89	2	27.71	4
sp|P69891|HBG1_HUMAN	R.LLVVYPWTQR.F	Y	53.46	1273.72	37.6	637.89	2	27.71	4
sp|P02100|HBE_HUMAN	R.LLVVYPWTQR.F	Y	53.46	1273.72	37.6	637.89	2	27.71	4
sp|P02042|HBD_HUMAN	R.LLVVYPWTQR.F	Y	53.46	1273.72	37.6	637.89	2	27.71	4
sp|P69892|HBG2_HUMAN	R.LLVVYPWTQR.F	Y	53.46	1273.72	37.6	637.89	2	27.71	4
tr|A0A0G2JL54|A0A0G2JL54_HUMAN	K.ITQVLHFTKDVK.A	Y	52.99	1427.81	39.1	714.942	2	16.48	2
tr|A0A140TA29|A0A140TA29_HUMAN	K.ITQVLHFTKDVK.A	Y	52.99	1427.81	39.1	714.942	2	16.48	2
tr|A0A140TA44|A0A140TA44_HUMAN	K.ITQVLHFTKDVK.A	Y	52.99	1427.81	39.1	714.942	2	16.48	2
tr|A0A140TA32|A0A140TA32_HUMAN	K.ITQVLHFTKDVK.A	Y	52.99	1427.81	39.1	714.942	2	16.48	2
tr|A0A140TA49|A0A140TA49_HUMAN	K.ITQVLHFTKDVK.A	Y	52.99	1427.81	39.1	714.942	2	16.48	2
tr|F5GXS0|F5GXS0_HUMAN	K.ITQVLHFTKDVK.A	Y	52.99	1427.81	39.1	714.942	2	16.48	2
tr|A0A0G2JPR0|A0A0G2JPR0_HUMAN	K.ITQVLHFTKDVK.A	Y	52.99	1427.81	39.1	714.942	2	16.48	2
sp|P0C0L4|CO4A_HUMAN	K.ITQVLHFTKDVK.A	Y	52.99	1427.81	39.1	714.942	2	16.48	2
sp|P0C0L5|CO4B_HUMAN	K.ITQVLHFTKDVK.A	Y	52.99	1427.81	39.1	714.942	2	16.48	2
sp|P69905|HBA_HUMAN	R.MFLSFPTTK.T	Y	52.93	1070.55	38.7	536.302	2	25.87	4
tr|G3V1N2|G3V1N2_HUMAN	MFLSFPTTK.T	Y	52.93	1070.55	38.7	536.302	2	25.87	4
tr|F8W6P5|F8W6P5_HUMAN	N.VDEVGGEALGR.L	Y	52.92	1100.55	24.5	551.294	2	13.44	2
sp|P68871|HBB_HUMAN	N.VDEVGGEALGR.L	Y	52.92	1100.55	24.5	551.294	2	13.44	2
sp|P02787|TRFE_HUMAN	K.SC(+57.02)HTGLGR.S	Y	52.49	886.408	16	444.218	2	5.58	1	Carbamidomethylation
tr|C9JVG0|C9JVG0_HUMAN	K.SC(+57.02)HTGLGR.S	Y	52.49	886.408	16	444.218	2	5.58	1	Carbamidomethylation
sp|P04732|MT1E_HUMAN	K.C(+57.02)AQGC(+57.02)VC(+57.02)K.G	Y	51.32	981.383	24.6	491.711	2	4.44	2	Carbamidomethylation
tr|H3BU80|H3BU80_HUMAN	K.C(+57.02)AQGC(+57.02)VC(+57.02)K.G	Y	51.32	981.383	24.6	491.711	2	4.44	2	Carbamidomethylation
sp|Q93083|MT1L_HUMAN	K.C(+57.02)AQGC(+57.02)VC(+57.02)K.G	Y	51.32	981.383	24.6	491.711	2	4.44	2	Carbamidomethylation
sp|P07438|MT1B_HUMAN	K.C(+57.02)AQGC(+57.02)VC(+57.02)K.G	Y	51.32	981.383	24.6	491.711	2	4.44	2	Carbamidomethylation
sp|P04733|MT1F_HUMAN	K.C(+57.02)AQGC(+57.02)VC(+57.02)K.G	Y	51.32	981.383	24.6	491.711	2	4.44	2	Carbamidomethylation
sp|P02749|APOH_HUMAN	K.VSFFC(+57.02)KNKEK.K	Y	51.1	1285.65	42.3	643.859	2	12.19	1	Carbamidomethylation
sp|P01023|A2MG_HUMAN	K.LPPNVVEESAR.A	Y	50.96	1209.64	32	605.844	2	15.96	2
sp|P02774|VTDB_HUMAN	R.GRDYEKN(+.98)KVC(+57.02)K.E	Y	50.51	1396.68	18.8	466.575	3	5.73	2	Deamidation (NQ); Carbamidomethylation
tr|D6RF35|D6RF35_HUMAN	R.GRDYEKN(+.98)KVC(+57.02)K.E	Y	50.51	1396.68	18.8	466.575	3	5.73	2	Deamidation (NQ); Carbamidomethylation
tr|D6RBJ7|D6RBJ7_HUMAN	R.GRDYEKN(+.98)KVC(+57.02)K.E	Y	50.51	1396.68	18.8	466.575	3	5.73	2	Deamidation (NQ); Carbamidomethylation
sp|P63267|ACTH_HUMAN	R.AVFPSIVGRPR.H	N	50.11	1197.7	43.7	599.883	2	20.35	1
sp|P68032|ACTC_HUMAN	R.AVFPSIVGRPR.H	N	50.11	1197.7	43.7	599.883	2	20.35	1
sp|P68133|ACTS_HUMAN	R.AVFPSIVGRPR.H	N	50.11	1197.7	43.7	599.883	2	20.35	1
sp|P62736|ACTA_HUMAN	R.AVFPSIVGRPR.H	N	50.11	1197.7	43.7	599.883	2	20.35	1
tr|A6NL76|A6NL76_HUMAN	R.AVFPSIVGRPR.H	N	50.11	1197.7	43.7	599.883	2	20.35	1
sp|P63261|ACTG_HUMAN	R.AVFPSIVGRPR.H	N	50.11	1197.7	43.7	599.883	2	20.35	1
sp|P60709|ACTB_HUMAN	R.AVFPSIVGRPR.H	N	50.11	1197.7	43.7	599.883	2	20.35	1
tr|C9JTX5|C9JTX5_HUMAN	R.AVFPSIVGRPR.H	N	50.11	1197.7	43.7	599.883	2	20.35	1
tr|C9JUM1|C9JUM1_HUMAN	R.AVFPSIVGRPR.H	N	50.11	1197.7	43.7	599.883	2	20.35	1
tr|C9JZR7|C9JZR7_HUMAN	R.AVFPSIVGRPR.H	N	50.11	1197.7	43.7	599.883	2	20.35	1
tr|F8WB63|F8WB63_HUMAN	R.AVFPSIVGRPR.H	N	50.11	1197.7	43.7	599.883	2	20.35	1
tr|B8ZZJ2|B8ZZJ2_HUMAN	R.AVFPSIVGRPR.H	N	50.11	1197.7	43.7	599.883	2	20.35	1
tr|G5E9R0|G5E9R0_HUMAN	R.AVFPSIVGRPR.H	N	50.11	1197.7	43.7	599.883	2	20.35	1
tr|K7EM38|K7EM38_HUMAN	R.AVFPSIVGRPR.H	N	50.11	1197.7	43.7	599.883	2	20.35	1
tr|C9JFL5|C9JFL5_HUMAN	R.AVFPSIVGRPR.H	N	50.11	1197.7	43.7	599.883	2	20.35	1
tr|F6QUT6|F6QUT6_HUMAN	R.AVFPSIVGRPR.H	N	50.11	1197.7	43.7	599.883	2	20.35	1
tr|F6UVQ4|F6UVQ4_HUMAN	R.AVFPSIVGRPR.H	N	50.11	1197.7	43.7	599.883	2	20.35	1
tr|E7EVS6|E7EVS6_HUMAN	R.AVFPSIVGRPR.H	N	50.11	1197.7	43.7	599.883	2	20.35	1
tr|I3L3R2|I3L3R2_HUMAN	R.AVFPSIVGRPR.H	N	50.11	1197.7	43.7	599.883	2	20.35	1
tr|J3KT65|J3KT65_HUMAN	R.AVFPSIVGRPR.H	N	50.11	1197.7	43.7	599.883	2	20.35	1
tr|I3L1U9|I3L1U9_HUMAN	R.AVFPSIVGRPR.H	N	50.11	1197.7	43.7	599.883	2	20.35	1
tr|I3L3I0|I3L3I0_HUMAN	R.AVFPSIVGRPR.H	N	50.11	1197.7	43.7	599.883	2	20.35	1
tr|A0A0C4DGB6|A0A0C4DGB6_HUMAN	L.GEYK(+42.01)FQNALLVR.Y	N	49.66	1478.79	51	740.439	2	10.57	13	Acetylation (K)
sp|P02768|ALBU_HUMAN	L.GEYK(+42.01)FQNALLVR.Y	N	49.66	1478.79	51	740.439	2	10.57	13	Acetylation (K)
tr|H0YA55|H0YA55_HUMAN	L.GEYK(+42.01)FQNALLVR.Y	N	49.66	1478.79	51	740.439	2	10.57	13	Acetylation (K)
tr|D6RHD5|D6RHD5_HUMAN	L.GEYK(+42.01)FQNALLVR.Y	N	49.66	1478.79	51	740.439	2	10.57	13	Acetylation (K)
tr|B7WNR0|B7WNR0_HUMAN	L.GEYK(+42.01)FQNALLVR.Y	N	49.66	1478.79	51	740.439	2	10.57	13	Acetylation (K)
tr|A0A087WWT3|A0A087WWT3_HUMAN	L.GEYK(+42.01)FQNALLVR.Y	N	49.66	1478.79	51	740.439	2	10.57	13	Acetylation (K)
sp|P01023|A2MG_HUMAN	K.GPTQEFKKR.T	Y	49.25	1089.59	24.1	545.817	2	6.93	1
tr|F8W7L3|F8W7L3_HUMAN	K.GPTQEFKKR.T	Y	49.25	1089.59	24.1	545.817	2	6.93	1
tr|A0A0C4DGB6|A0A0C4DGB6_HUMAN	K.AEFAEVSK(+42.01)LVTDLTK.V	N	49.2	1691.9	79.4	847.023	2	31.16	22	Acetylation (K)
sp|P02768|ALBU_HUMAN	K.AEFAEVSK(+42.01)LVTDLTK.V	N	49.2	1691.9	79.4	847.023	2	31.16	22	Acetylation (K)
tr|H0YA55|H0YA55_HUMAN	K.AEFAEVSK(+42.01)LVTDLTK.V	N	49.2	1691.9	79.4	847.023	2	31.16	22	Acetylation (K)
tr|D6RHD5|D6RHD5_HUMAN	K.AEFAEVSK(+42.01)LVTDLTK.V	N	49.2	1691.9	79.4	847.023	2	31.16	22	Acetylation (K)
tr|B7WNR0|B7WNR0_HUMAN	K.AEFAEVSK(+42.01)LVTDLTK.V	N	49.2	1691.9	79.4	847.023	2	31.16	22	Acetylation (K)
sp|P02787|TRFE_HUMAN	K.SCHTGLGR.S	Y	48.98	829.386	7.3	415.704	2	6.17	2
tr|C9JVG0|C9JVG0_HUMAN	K.SCHTGLGR.S	Y	48.98	829.386	7.3	415.704	2	6.17	2
sp|P01024|CO3_HUMAN	K.GYTQQLAFR.Q	Y	48.64	1082.55	37	542.303	2	17.61	1
sp|P02787|TRFE_HUMAN	K.KSC(+57.02)HTGLGR.S	Y	48.47	1014.5	18	508.268	2	3.68	6	Carbamidomethylation
tr|C9JVG0|C9JVG0_HUMAN	K.KSC(+57.02)HTGLGR.S	Y	48.47	1014.5	18	508.268	2	3.68	6	Carbamidomethylation
sp|P01023|A2MG_HUMAN	K.ALLAYAFALAGNQDK(+42.01)R.K	Y	47.71	1762.94	49	588.682	3	28.87	1	Acetylation (K)
tr|Q5VY30|Q5VY30_HUMAN	K.YWGVASFLQK.G	Y	47.65	1197.62	47.1	599.845	2	27.77	1
tr|A0A0C4DGV7|A0A0C4DGV7_HUMAN	K.YWGVASFLQK.G	Y	47.65	1197.62	47.1	599.845	2	27.77	1
sp|P02753|RET4_HUMAN	K.YWGVASFLQK.G	Y	47.65	1197.62	47.1	599.845	2	27.77	1
sp|P01023|A2MG_HUMAN	R.QTVSWAVTPK.S	Y	47.64	1115.6	28.2	558.822	2	18.4	4
sp|P00747|PLMN_HUMAN	M.HFC(+57.02)GGTLISPE(-.98).W	Y	47.45	1215.57	62.2	608.83	2	16.31	3	Carbamidomethylation; Amidation
sp|P23142|FBLN1_HUMAN	R.GGGPC(+57.02)KQQC(+57.02)R.D	Y	47.22	1146.5	37.7	574.28	2	2.21	1	Carbamidomethylation
tr|B1AHL2|B1AHL2_HUMAN	R.GGGPC(+57.02)KQQC(+57.02)R.D	Y	47.22	1146.5	37.7	574.28	2	2.21	1	Carbamidomethylation
tr|B1AHM8|B1AHM8_HUMAN	T.GGGPC(+57.02)KQQC(+57.02)R.D	Y	47.22	1146.5	37.7	574.28	2	2.21	1	Carbamidomethylation
tr|H7C1M6|H7C1M6_HUMAN	R.GGGPC(+57.02)KQQC(+57.02)R.D	Y	47.22	1146.5	37.7	574.28	2	2.21	1	Carbamidomethylation
tr|B1AHN3|B1AHN3_HUMAN	T.GGGPC(+57.02)KQQC(+57.02)R.D	Y	47.22	1146.5	37.7	574.28	2	2.21	1	Carbamidomethylation
sp|P02771|FETA_HUMAN	K.GYQELLEK.C	Y	46.98	978.502	25.6	490.271	2	16.86	2
tr|J3KMX3|J3KMX3_HUMAN	K.GYQELLEK.C	Y	46.98	978.502	25.6	490.271	2	16.86	2
sp|P02771|FETA_HUMAN	S.EEGRHN(+.98)C(+57.02)FLAHKK.P	Y	46.92	1625.77	4.5	407.452	4	8.14	2	Deamidation (NQ); Carbamidomethylation
tr|J3KMX3|J3KMX3_HUMAN	S.EEGRHN(+.98)C(+57.02)FLAHKK.P	Y	46.92	1625.77	4.5	407.452	4	8.14	2	Deamidation (NQ); Carbamidomethylation
sp|P69905|HBA_HUMAN	R.M(+15.99)FLSFPTTK.T	Y	46.37	1086.54	38.6	544.299	2	23.32	1	Oxidation (M)
tr|G3V1N2|G3V1N2_HUMAN	M(+15.99)FLSFPTTK.T	Y	46.37	1086.54	38.6	544.299	2	23.32	1	Oxidation (M)
tr|Q5VY30|Q5VY30_HUMAN	R.QRQEELCLAR.Q	Y	46.33	1244.63	38.6	623.346	2	14.23	1
tr|A0A0C4DGV7|A0A0C4DGV7_HUMAN	R.QRQEELCLAR.Q	Y	46.33	1244.63	38.6	623.346	2	14.23	1
sp|P02753|RET4_HUMAN	R.QRQEELCLAR.Q	Y	46.33	1244.63	38.6	623.346	2	14.23	1
tr|Q5VY30|Q5VY30_HUMAN	R.VKENFDKAR.F	Y	45.54	1105.59	26.6	553.816	2	7.12	1
tr|A0A0C4DGV7|A0A0C4DGV7_HUMAN	R.VKENFDKAR.F	Y	45.54	1105.59	26.6	553.816	2	7.12	1
sp|P02753|RET4_HUMAN	R.VKENFDKAR.F	Y	45.54	1105.59	26.6	553.816	2	7.12	1
tr|A0A0G2JL54|A0A0G2JL54_HUMAN	R.QGSFQGGFR.S	Y	45.5	982.462	31.7	492.254	2	13.09	1
tr|A0A140TA29|A0A140TA29_HUMAN	R.QGSFQGGFR.S	Y	45.5	982.462	31.7	492.254	2	13.09	1
tr|A0A140TA44|A0A140TA44_HUMAN	R.QGSFQGGFR.S	Y	45.5	982.462	31.7	492.254	2	13.09	1
tr|A0A140TA32|A0A140TA32_HUMAN	R.QGSFQGGFR.S	Y	45.5	982.462	31.7	492.254	2	13.09	1
tr|A0A140TA49|A0A140TA49_HUMAN	R.QGSFQGGFR.S	Y	45.5	982.462	31.7	492.254	2	13.09	1
tr|F5GXS0|F5GXS0_HUMAN	R.QGSFQGGFR.S	Y	45.5	982.462	31.7	492.254	2	13.09	1
tr|A0A0G2JPR0|A0A0G2JPR0_HUMAN	R.QGSFQGGFR.S	Y	45.5	982.462	31.7	492.254	2	13.09	1
sp|P0C0L4|CO4A_HUMAN	R.QGSFQGGFR.S	Y	45.5	982.462	31.7	492.254	2	13.09	1
sp|P0C0L5|CO4B_HUMAN	R.QGSFQGGFR.S	Y	45.5	982.462	31.7	492.254	2	13.09	1
sp|P02771|FETA_HUMAN	R.SC(+57.02)GLFQK.L	Y	45.29	838.401	9.4	420.212	2	13.31	3	Carbamidomethylation
tr|J3KMX3|J3KMX3_HUMAN	R.SC(+57.02)GLFQK.L	Y	45.29	838.401	9.4	420.212	2	13.31	3	Carbamidomethylation
sp|P69905|HBA_HUMAN	K.VGAHAGEYGAEALERMFLSFPTTK.T	Y	45.15	2581.26	45.9	646.353	4	33.62	1
tr|Q5T985|Q5T985_HUMAN	K.MKQTVEAMK.T	Y	44.34	1064.54	24.5	533.288	2	9.42	2
tr|A0A087WTE1|A0A087WTE1_HUMAN	K.MKQTVEAMK.T	Y	44.34	1064.54	24.5	533.288	2	9.42	2
sp|P19823|ITIH2_HUMAN	K.MKQTVEAMK.T	Y	44.34	1064.54	24.5	533.288	2	9.42	2
sp|P02774|VTDB_HUMAN	K.LC(+57.02)DNLSTK.N	Y	43.78	949.454	16.4	475.742	2	10.64	4	Carbamidomethylation
tr|D6RF35|D6RF35_HUMAN	K.LC(+57.02)DNLSTK.N	Y	43.78	949.454	16.4	475.742	2	10.64	4	Carbamidomethylation
tr|D6RBJ7|D6RBJ7_HUMAN	K.LC(+57.02)DNLSTK.N	Y	43.78	949.454	16.4	475.742	2	10.64	4	Carbamidomethylation
sp|P01023|A2MG_HUMAN	K.YGAATFTRTGK.A	Y	42.99	1171.6	29.2	586.824	2	11.73	2
sp|P02787|TRFE_HUMAN	K.KSCHTGLGR.S	Y	42.96	957.481	19.2	479.757	2	3.87	2
tr|C9JVG0|C9JVG0_HUMAN	K.KSCHTGLGR.S	Y	42.96	957.481	19.2	479.757	2	3.87	2
tr|G3XAP6|G3XAP6_HUMAN	R.AVAEPGIQLK.A	N	42.91	1024.59	20.8	513.314	2	17.65	1
sp|P49747|COMP_HUMAN	R.AVAEPGIQLK.A	N	42.91	1024.59	20.8	513.314	2	17.65	1
tr|Q5T985|Q5T985_HUMAN	R.AKGKTAGLVR.S	Y	42.72	999.619	19.2	500.826	2	6.58	2
tr|A0A087WTE1|A0A087WTE1_HUMAN	R.AKGKTAGLVR.S	Y	42.72	999.619	19.2	500.826	2	6.58	2
sp|P19823|ITIH2_HUMAN	R.AKGKTAGLVR.S	Y	42.72	999.619	19.2	500.826	2	6.58	2
tr|Q5T987|Q5T987_HUMAN	R.AKGKTAGLVR.S	Y	42.72	999.619	19.2	500.826	2	6.58	2
sp|P02787|TRFE_HUMAN	K.C(+57.02)LKDGAGDVAFVK.H	Y	42.62	1378.69	66	690.399	2	28.68	3	Carbamidomethylation
tr|C9JVG0|C9JVG0_HUMAN	K.C(+57.02)LKDGAGDVAFVK.H	Y	42.62	1378.69	66	690.399	2	28.68	3	Carbamidomethylation
sp|P02765|FETUA_HUMAN	K.Q(-17.03)YGFC(+57.02)K.A	N	42.14	784.321	49.9	785.368	1	14.68	2	Pyro-glu from Q; Carbamidomethylation
tr|C9JV77|C9JV77_HUMAN	K.Q(-17.03)YGFC(+57.02)K.A	N	42.14	784.321	49.9	785.368	1	14.68	2	Pyro-glu from Q; Carbamidomethylation
sp|P01023|A2MG_HUMAN	K.ATVLNYLPK.C	N	41.74	1017.59	22.6	509.812	2	23.42	1
tr|G3V2B9|G3V2B9_HUMAN	K.QINDYVEK.G	Y	41.68	1007.49	55.7	504.781	2	10.05	1
tr|A0A0G2JRN3|A0A0G2JRN3_HUMAN	K.QINDYVEK.G	Y	41.68	1007.49	55.7	504.781	2	10.05	1
tr|A0A024R6I7|A0A024R6I7_HUMAN	K.QINDYVEK.G	Y	41.68	1007.49	55.7	504.781	2	10.05	1
sp|P01009|A1AT_HUMAN	K.QINDYVEK.G	Y	41.68	1007.49	55.7	504.781	2	10.05	1
sp|Q6ZU45|YA021_HUMAN	R.TREQLVPR.L	Y	41.12	997.567	-21.4	499.78	2	14.12	4
sp|P02765|FETUA_HUMAN	Q.LHRAHYDLR.H	Y	40.4	1179.63	35.8	590.841	2	8.28	2
tr|C9JV77|C9JV77_HUMAN	Q.LHRAHYDLR.H	Y	40.4	1179.63	35.8	590.841	2	8.28	2
sp|P02765|FETUA_HUMAN	N.LLAEKQYGFC(+57.02)K.A	N	40.31	1355.69	13.1	452.91	3	15.94	1	Carbamidomethylation
tr|C9JV77|C9JV77_HUMAN	N.LLAEKQYGFC(+57.02)K.A	N	40.31	1355.69	13.1	452.91	3	15.94	1	Carbamidomethylation
sp|P01023|A2MG_HUMAN	K.YGAATFTRTG.K	Y	40.18	1043.5	31.3	522.775	2	13.67	2
sp|P02749|APOH_HUMAN	K.VSFFC(+57.02)KNK.E	Y	39.96	1028.51	31.5	515.279	2	14.28	1	Carbamidomethylation
sp|P02795|MT2_HUMAN	K.GASDKC(+57.02)SC(+57.02)C(+57.02)A	Y	38.68	1114.38	21.3	558.211	2	2.83	2	Carbamidomethylation
sp|P00747|PLMN_HUMAN	R.TPENFPC(+57.02)K.N	Y	38.59	991.443	26.4	496.742	2	11.53	1	Carbamidomethylation
tr|C9JV77|C9JV77_HUMAN	G.KFSVVYAKCDSSPADSAEDVR.K	Y	38.48	2273.06	31.8	758.719	3	24.46	1
sp|P02765|FETUA_HUMAN	V.YAK(+42.01)C(+57.02)DSSPDSAEDVRK.V	Y	38.34	1868.82	-26.2	935.393	2	7.68	2	Acetylation (K); Carbamidomethylation
tr|E7ES19|E7ES19_HUMAN	R.AVAEPGIQLK.A	Y	37.9	1024.59	33.2	513.32	2	17.61	1
sp|P35443|TSP4_HUMAN	R.AVAEPGIQLK.A	Y	37.9	1024.59	33.2	513.32	2	17.61	1
sp|P02765|FETUA_HUMAN	L.HRAHYDLR.H	N	37.76	1066.54	-7.7	356.519	3	6.56	4
tr|C9JV77|C9JV77_HUMAN	L.HRAHYDLR.H	N	37.76	1066.54	-7.7	356.519	3	6.56	4
sp|P07996|TSP1_HUMAN	R.TIVTTLQDSIR.K	Y	37.31	1245.69	35.6	623.876	2	23.18	1
tr|Q5T985|Q5T985_HUMAN	G.GSEIVVAGK.F	Y	37.16	858.481	14.1	430.254	2	12.67	1
tr|A0A087WTE1|A0A087WTE1_HUMAN	G.GSEIVVAGK.F	Y	37.16	858.481	14.1	430.254	2	12.67	1
sp|P19823|ITIH2_HUMAN	G.GSEIVVAGK.F	Y	37.16	858.481	14.1	430.254	2	12.67	1
sp|P00747|PLMN_HUMAN	K.C(+57.02)QSWSSMTPHR.H	Y	37.06	1375.58	46.4	688.827	2	14.08	2	Carbamidomethylation
sp|P08519|APOA_HUMAN	T.C(+57.02)QSWSSMTPHR.H	Y	37.06	1375.58	46.4	688.827	2	14.08	2	Carbamidomethylation
sp|P02765|FETUA_HUMAN	K.C(+57.02)NLLAEK.Q	Y	36.77	846.427	12.8	424.226	2	13.03	2	Carbamidomethylation
tr|C9JV77|C9JV77_HUMAN	K.C(+57.02)NLLAEK.Q	Y	36.77	846.427	12.8	424.226	2	13.03	2	Carbamidomethylation
tr|A0A0G2JH38|A0A0G2JH38_HUMAN	H.C(+57.02)YDGYTLR.G	Y	36.68	1046.45	24.2	524.245	2	14.17	2	Carbamidomethylation
sp|P00751|CFAB_HUMAN	H.C(+57.02)YDGYTLR.G	Y	36.68	1046.45	24.2	524.245	2	14.17	2	Carbamidomethylation
tr|E7ETN3|E7ETN3_HUMAN	H.C(+57.02)YDGYTLR.G	Y	36.68	1046.45	24.2	524.245	2	14.17	2	Carbamidomethylation
tr|B4E1Z4|B4E1Z4_HUMAN	H.C(+57.02)YDGYTLR.G	Y	36.68	1046.45	24.2	524.245	2	14.17	2	Carbamidomethylation
tr|C9JRT3|C9JRT3_HUMAN	H.C(+57.02)YDGYTLR.G	Y	36.68	1046.45	24.2	524.245	2	14.17	2	Carbamidomethylation
sp|P02649|APOE_HUMAN	R.LQAEAFQAR.L	Y	36.59	1032.54	29.2	517.29	2	14.27	3
tr|Q5T987|Q5T987_HUMAN	R.KLGSYEHR.I	Y	36.47	988.509	14.4	495.269	2	9.98	2
tr|Q5T985|Q5T985_HUMAN	R.KLGSYEHR.I	Y	36.47	988.509	14.4	495.269	2	9.98	2
tr|A0A087WTE1|A0A087WTE1_HUMAN	R.KLGSYEHR.I	Y	36.47	988.509	14.4	495.269	2	9.98	2
sp|P19823|ITIH2_HUMAN	R.KLGSYEHR.I	Y	36.47	988.509	14.4	495.269	2	9.98	2
tr|A0A087WW43|A0A087WW43_HUMAN	R.GISMLNK.A	Y	36.34	761.41	61.7	762.465	1	14.35	2
tr|E7ET33|E7ET33_HUMAN	R.GISMLNK.A	Y	36.34	761.41	61.7	762.465	1	14.35	2
sp|Q06033|ITIH3_HUMAN	R.GISMLNK.A	Y	36.34	761.41	61.7	762.465	1	14.35	2
sp|P02765|FETUA_HUMAN	K.QYGFC(+57.02)K.A	Y	36.04	801.348	9.8	401.685	2	10.89	5	Carbamidomethylation
tr|C9JV77|C9JV77_HUMAN	K.QYGFC(+57.02)K.A	Y	36.04	801.348	9.8	401.685	2	10.89	5	Carbamidomethylation
sp|P02748|CO9_HUMAN	R.VVEESELAR.T	Y	35.85	1030.53	16.6	516.28	2	12.08	2
sp|P63267|ACTH_HUMAN	R.HQGVMVGMGQK.D	Y	35.68	1170.56	27.8	586.306	2	12.49	1
sp|P68032|ACTC_HUMAN	R.HQGVMVGMGQK.D	Y	35.68	1170.56	27.8	586.306	2	12.49	1
sp|P68133|ACTS_HUMAN	R.HQGVMVGMGQK.D	Y	35.68	1170.56	27.8	586.306	2	12.49	1
sp|P62736|ACTA_HUMAN	R.HQGVMVGMGQK.D	Y	35.68	1170.56	27.8	586.306	2	12.49	1
tr|A6NL76|A6NL76_HUMAN	R.HQGVMVGMGQK.D	Y	35.68	1170.56	27.8	586.306	2	12.49	1
sp|P63261|ACTG_HUMAN	R.HQGVMVGMGQK.D	Y	35.68	1170.56	27.8	586.306	2	12.49	1
sp|P60709|ACTB_HUMAN	R.HQGVMVGMGQK.D	Y	35.68	1170.56	27.8	586.306	2	12.49	1
tr|C9JTX5|C9JTX5_HUMAN	R.HQGVMVGMGQK.D	Y	35.68	1170.56	27.8	586.306	2	12.49	1
tr|C9JUM1|C9JUM1_HUMAN	R.HQGVMVGMGQK.D	Y	35.68	1170.56	27.8	586.306	2	12.49	1
tr|C9JZR7|C9JZR7_HUMAN	R.HQGVMVGMGQK.D	Y	35.68	1170.56	27.8	586.306	2	12.49	1
tr|F8WB63|F8WB63_HUMAN	R.HQGVMVGMGQK.D	Y	35.68	1170.56	27.8	586.306	2	12.49	1
tr|B8ZZJ2|B8ZZJ2_HUMAN	R.HQGVMVGMGQK.D	Y	35.68	1170.56	27.8	586.306	2	12.49	1
tr|G5E9R0|G5E9R0_HUMAN	R.HQGVMVGMGQK.D	Y	35.68	1170.56	27.8	586.306	2	12.49	1
tr|K7EM38|K7EM38_HUMAN	R.HQGVMVGMGQK.D	Y	35.68	1170.56	27.8	586.306	2	12.49	1
tr|C9JFL5|C9JFL5_HUMAN	R.HQGVMVGMGQK.D	Y	35.68	1170.56	27.8	586.306	2	12.49	1
tr|F6QUT6|F6QUT6_HUMAN	R.HQGVMVGMGQK.D	Y	35.68	1170.56	27.8	586.306	2	12.49	1
tr|F6UVQ4|F6UVQ4_HUMAN	R.HQGVMVGMGQK.D	Y	35.68	1170.56	27.8	586.306	2	12.49	1
tr|E7EVS6|E7EVS6_HUMAN	R.HQGVMVGMGQK.D	Y	35.68	1170.56	27.8	586.306	2	12.49	1
tr|I3L3R2|I3L3R2_HUMAN	R.HQGVMVGMGQK.D	Y	35.68	1170.56	27.8	586.306	2	12.49	1
tr|J3KT65|J3KT65_HUMAN	R.HQGVMVGMGQK.D	Y	35.68	1170.56	27.8	586.306	2	12.49	1
tr|I3L1U9|I3L1U9_HUMAN	R.HQGVMVGMGQK.D	Y	35.68	1170.56	27.8	586.306	2	12.49	1
tr|I3L3I0|I3L3I0_HUMAN	R.HQGVMVGMGQK.D	Y	35.68	1170.56	27.8	586.306	2	12.49	1
sp|Q562R1|ACTBL_HUMAN	R.HQGVMVGMGQK.D	Y	35.68	1170.56	27.8	586.306	2	12.49	1
sp|P02771|FETA_HUMAN	K.LGEYYLQNAFLVAY.T	Y	35.61	1662.83	57.5	832.47	2	32.31	2
tr|J3KMX3|J3KMX3_HUMAN	K.LGEYYLQNAFLVAY.T	Y	35.61	1662.83	57.5	832.47	2	32.31	2
sp|P02774|VTDB_HUMAN	K.GQELC(+57.02)ADYSENTFTEYKK.K	Y	35.23	2181.95	44.5	728.357	3	18.41	1	Carbamidomethylation
tr|D6RF35|D6RF35_HUMAN	K.GQELC(+57.02)ADYSENTFTEYKK.K	Y	35.23	2181.95	44.5	728.357	3	18.41	1	Carbamidomethylation
sp|P02765|FETUA_HUMAN	R.AHYDLR.H	Y	35.17	773.382	8.2	387.701	2	8.31	16
tr|C9JV77|C9JV77_HUMAN	R.AHYDLR.H	Y	35.17	773.382	8.2	387.701	2	8.31	16
sp|P01023|A2MG_HUMAN	K.GPTQEFK.K	Y	35.12	805.397	1.6	403.706	2	9	2
tr|F8W7L3|F8W7L3_HUMAN	K.GPTQEFK.K	Y	35.12	805.397	1.6	403.706	2	9	2
sp|P69905|HBA_HUMAN	R.VDPVNFK.L	Y	34.71	817.433	7.1	409.727	2	15.05	1
tr|G3V1N2|G3V1N2_HUMAN	R.VDPVNFK.L	Y	34.71	817.433	7.1	409.727	2	15.05	1
sp|P02008|HBAZ_HUMAN	R.VDPVNFK.L	Y	34.71	817.433	7.1	409.727	2	15.05	1
tr|A0A0C4DGB6|A0A0C4DGB6_HUMAN	K.YLYEIAR.R	Y	34.63	926.486	16.9	464.258	2	18.45	94
sp|P02768|ALBU_HUMAN	K.YLYEIAR.R	Y	34.63	926.486	16.9	464.258	2	18.45	94
tr|H0YA55|H0YA55_HUMAN	R.YLYEIAR.R	Y	34.63	926.486	16.9	464.258	2	18.45	94
tr|D6RHD5|D6RHD5_HUMAN	L.YLYEIAR.R	Y	34.63	926.486	16.9	464.258	2	18.45	94
tr|B7WNR0|B7WNR0_HUMAN	L.YLYEIAR.R	Y	34.63	926.486	16.9	464.258	2	18.45	94
tr|H7C013|H7C013_HUMAN	K.YLYEIAR.R	Y	34.63	926.486	16.9	464.258	2	18.45	94
tr|E9PLL4|E9PLL4_HUMAN	R.ASSPPQILPQ.L	Y	34.38	1036.56	32.5	519.302	2	16.01	2
tr|E9PPA1|E9PPA1_HUMAN	R.ASSPPQILPQ.L	Y	34.38	1036.56	32.5	519.302	2	16.01	2
tr|C9JCS0|C9JCS0_HUMAN	R.ASSPPQILPQ	Y	34.38	1036.56	32.5	519.302	2	16.01	2
tr|C9JBS2|C9JBS2_HUMAN	R.ASSPPQILPQ.L	Y	34.38	1036.56	32.5	519.302	2	16.01	2
tr|E9PID2|E9PID2_HUMAN	R.ASSPPQILPQ.L	Y	34.38	1036.56	32.5	519.302	2	16.01	2
tr|B5MBY7|B5MBY7_HUMAN	R.ASSPPQILPQ.L	Y	34.38	1036.56	32.5	519.302	2	16.01	2
sp|Q13133|NR1H3_HUMAN	R.ASSPPQILPQ.L	Y	34.38	1036.56	32.5	519.302	2	16.01	2
tr|B4DXU5|B4DXU5_HUMAN	R.ASSPPQILPQ.L	Y	34.38	1036.56	32.5	519.302	2	16.01	2
sp|Q6ZU45|YA021_HUMAN	S.RTREQLVPR.L	Y	33.83	1153.67	-1	577.841	2	12.59	2
tr|Q5T985|Q5T985_HUMAN	R.ALYAQAR.A	Y	33.64	791.429	7.1	396.725	2	9.59	2
tr|A0A087WTE1|A0A087WTE1_HUMAN	R.ALYAQAR.A	Y	33.64	791.429	7.1	396.725	2	9.59	2
sp|P19823|ITIH2_HUMAN	R.ALYAQAR.A	Y	33.64	791.429	7.1	396.725	2	9.59	2
tr|Q5T987|Q5T987_HUMAN	R.ALYAQAR.A	Y	33.64	791.429	7.1	396.725	2	9.59	2
sp|P01023|A2MG_HUMAN	Q.TVSWAVTPK.S	Y	33.37	987.539	30	494.792	2	17.95	2
tr|F8WAS2|F8WAS2_HUMAN	R.SLKVNC(+57.02)KVTSR.F	Y	33.21	1290.71	20.4	431.252	3	9.9	1	Carbamidomethylation
sp|P19827|ITIH1_HUMAN	R.SLKVNC(+57.02)KVTSR.F	Y	33.21	1290.71	20.4	431.252	3	9.9	1	Carbamidomethylation
tr|H0YMA2|H0YMA2_HUMAN	R.VAAAITK.N	Y	33.1	672.417	-7.3	337.213	2	9.24	3
tr|G5EA42|G5EA42_HUMAN	R.VAAAITK.N	Y	33.1	672.417	-7.3	337.213	2	9.24	3
sp|Q9NZR1|TMOD2_HUMAN	R.VAAAITK.N	Y	33.1	672.417	-7.3	337.213	2	9.24	3
sp|P02774|VTDB_HUMAN	K.LC(+57.02)MAALK.H	Y	32.74	805.419	10.7	403.721	2	17	2	Carbamidomethylation
tr|D6RF35|D6RF35_HUMAN	K.LC(+57.02)MAALK.H	Y	32.74	805.419	10.7	403.721	2	17	2	Carbamidomethylation
tr|D6RBJ7|D6RBJ7_HUMAN	K.LC(+57.02)MAALK.H	Y	32.74	805.419	10.7	403.721	2	17	2	Carbamidomethylation
tr|D6RF20|D6RF20_HUMAN	K.LC(+57.02)MAALK.H	Y	32.74	805.419	10.7	403.721	2	17	2	Carbamidomethylation
sp|P23142|FBLN1_HUMAN	R.C(+57.02)LAFEC(+57.02)PENYRR.S	Y	32.66	1613.71	25.5	538.924	3	17.8	1	Carbamidomethylation
tr|B1AHL2|B1AHL2_HUMAN	R.C(+57.02)LAFEC(+57.02)PENYRR.S	Y	32.66	1613.71	25.5	538.924	3	17.8	1	Carbamidomethylation
sp|P02452|CO1A1_HUMAN	K.TVIEYKTTK.T	Y	32.62	1081.6	24.2	541.821	2	10.94	1
tr|H7C0L5|H7C0L5_HUMAN	K.VRPQQLVK.H	Y	32.56	966.597	23.4	484.317	2	11.52	3
sp|Q14624|ITIH4_HUMAN	K.VRPQQLVK.H	Y	32.56	966.597	23.4	484.317	2	11.52	3
tr|B7ZKJ8|B7ZKJ8_HUMAN	K.VRPQQLVK.H	Y	32.56	966.597	23.4	484.317	2	11.52	3
sp|P00747|PLMN_HUMAN	R.AFQYHSK.E	Y	32.21	879.424	10.9	440.724	2	7.56	1
sp|Q02325|PLGB_HUMAN	R.AFQYHSK.E	Y	32.21	879.424	10.9	440.724	2	7.56	1
sp|Q15195|PLGA_HUMAN	R.AFQYHSK.E	Y	32.21	879.424	10.9	440.724	2	7.56	1
tr|Q5TEH5|Q5TEH5_HUMAN	R.AFQYHSK.E	Y	32.21	879.424	10.9	440.724	2	7.56	1
tr|A6PVI2|A6PVI2_HUMAN	K.AFQYHSK.E	Y	32.21	879.424	10.9	440.724	2	7.56	1
tr|Q5T985|Q5T985_HUMAN	K.IQPSGGTNINEALLR.A	Y	31.82	1581.85	63.3	791.981	2	20.86	1
tr|A0A087WTE1|A0A087WTE1_HUMAN	K.IQPSGGTNINEALLR.A	Y	31.82	1581.85	63.3	791.981	2	20.86	1
sp|P19823|ITIH2_HUMAN	K.IQPSGGTNINEALLR.A	Y	31.82	1581.85	63.3	791.981	2	20.86	1
sp|P23142|FBLN1_HUMAN	K.NVPNC(+57.02)GR.G	Y	30.91	815.371	0	408.693	2	5.67	2	Carbamidomethylation
tr|B1AHL2|B1AHL2_HUMAN	K.NVPNC(+57.02)GR.G	Y	30.91	815.371	0	408.693	2	5.67	2	Carbamidomethylation
tr|E7EQB2|E7EQB2_HUMAN	R.C(+57.02)LAENAGDVAFVKDVTVLQNTDGN(+.98)NNEAWAK.D	Y	30.73	3363.57	82.4	841.968	4	22.85	1	Carbamidomethylation; Deamidation (NQ)
tr|E7ER44|E7ER44_HUMAN	R.C(+57.02)LAENAGDVAFVKDVTVLQNTDGN(+.98)NNEAWAK.D	Y	30.73	3363.57	82.4	841.968	4	22.85	1	Carbamidomethylation; Deamidation (NQ)
sp|P02788|TRFL_HUMAN	R.C(+57.02)LAENAGDVAFVKDVTVLQNTDGN(+.98)NNEAWAK.D	Y	30.73	3363.57	82.4	841.968	4	22.85	1	Carbamidomethylation; Deamidation (NQ)
sp|P43652|AFAM_HUMAN	R.FLVNLVK.L	Y	30.21	831.522	5.3	416.77	2	24.5	1
sp|P02771|FETA_HUMAN	K.RSC(+57.02)GLFQK.L	Y	30.1	994.502	18.6	498.267	2	11.37	3	Carbamidomethylation
tr|J3KMX3|J3KMX3_HUMAN	K.RSC(+57.02)GLFQK.L	Y	30.1	994.502	18.6	498.267	2	11.37	3	Carbamidomethylation
sp|P02787|TRFE_HUMAN	K.KSCHTAVGR.T	Y	29.88	957.481	14.7	479.755	2	4.4	1
tr|A0A0C4DGB6|A0A0C4DGB6_HUMAN	K.KVPQ(+.98)VSTPTLVEVSR.N	N	29.59	1639.91	70.5	821.022	2	42.91	2	Deamidation (NQ)
sp|P02768|ALBU_HUMAN	K.KVPQ(+.98)VSTPTLVEVSR.N	N	29.59	1639.91	70.5	821.022	2	42.91	2	Deamidation (NQ)
tr|H0YA55|H0YA55_HUMAN	K.KVPQ(+.98)VSTPTLVEVSR.N	N	29.59	1639.91	70.5	821.022	2	42.91	2	Deamidation (NQ)
tr|D6RHD5|D6RHD5_HUMAN	K.KVPQ(+.98)VSTPTLVEVSR.N	N	29.59	1639.91	70.5	821.022	2	42.91	2	Deamidation (NQ)
tr|B7WNR0|B7WNR0_HUMAN	K.KVPQ(+.98)VSTPTLVEVSR.N	N	29.59	1639.91	70.5	821.022	2	42.91	2	Deamidation (NQ)
tr|A0A087WWT3|A0A087WWT3_HUMAN	K.KVPQ(+.98)VSTPTLVEVSR.N	N	29.59	1639.91	70.5	821.022	2	42.91	2	Deamidation (NQ)
tr|A0A0C4DGB6|A0A0C4DGB6_HUMAN	A.EVSK(+42.01)LVTDLTK.V	N	29.49	1273.71	44.2	637.892	2	10.67	1	Acetylation (K)
sp|P02768|ALBU_HUMAN	A.EVSK(+42.01)LVTDLTK.V	N	29.49	1273.71	44.2	637.892	2	10.67	1	Acetylation (K)
tr|H0YA55|H0YA55_HUMAN	A.EVSK(+42.01)LVTDLTK.V	N	29.49	1273.71	44.2	637.892	2	10.67	1	Acetylation (K)
tr|D6RHD5|D6RHD5_HUMAN	A.EVSK(+42.01)LVTDLTK.V	N	29.49	1273.71	44.2	637.892	2	10.67	1	Acetylation (K)
tr|B7WNR0|B7WNR0_HUMAN	A.EVSK(+42.01)LVTDLTK.V	N	29.49	1273.71	44.2	637.892	2	10.67	1	Acetylation (K)
sp|P29622|KAIN_HUMAN	W.ADLSGITK.Q	Y	29.37	803.439	7.6	402.73	2	12.47	1
sp|P02787|TRFE_HUMAN	S.C(+57.02)HTGLGR.S	Y	29.28	799.376	4.1	400.697	2	5.72	2	Carbamidomethylation
tr|C9JVG0|C9JVG0_HUMAN	S.C(+57.02)HTGLGR.S	Y	29.28	799.376	4.1	400.697	2	5.72	2	Carbamidomethylation
tr|A6XGL3|A6XGL3_HUMAN	K.NKPGVYTK.V	Y	29.24	905.497	8.1	453.76	2	6.26	1
sp|P07477|TRY1_HUMAN	K.NKPGVYTK.V	Y	29.24	905.497	8.1	453.76	2	6.26	1
tr|E7EQ64|E7EQ64_HUMAN	K.NKPGVYTK.V	Y	29.24	905.497	8.1	453.76	2	6.26	1
tr|A0A087WWD8|A0A087WWD8_HUMAN	R.NKPGVYTK.V	Y	29.24	905.497	8.1	453.76	2	6.26	1
tr|E9PRA0|E9PRA0_HUMAN	R.NKPGVYTK.V	Y	29.24	905.497	8.1	453.76	2	6.26	1
tr|J3KQC6|J3KQC6_HUMAN	R.NKPGVYTK.V	Y	29.24	905.497	8.1	453.76	2	6.26	1
sp|Q9BYE2|TMPSD_HUMAN	R.NKPGVYTK.V	Y	29.24	905.497	8.1	453.76	2	6.26	1
tr|G3V2B9|G3V2B9_HUMAN	K.KQINDYVEK.G	Y	29.08	1135.59	55.6	568.832	2	9.21	1
tr|A0A0G2JRN3|A0A0G2JRN3_HUMAN	K.KQINDYVEK.G	Y	29.08	1135.59	55.6	568.832	2	9.21	1
tr|A0A024R6I7|A0A024R6I7_HUMAN	K.KQINDYVEK.G	Y	29.08	1135.59	55.6	568.832	2	9.21	1
sp|P01009|A1AT_HUMAN	K.KQINDYVEK.G	Y	29.08	1135.59	55.6	568.832	2	9.21	1
sp|P02771|FETA_HUMAN	K.YIQESQALAKR.S	Y	29.03	1305.7	45.5	653.889	2	12.05	1
tr|J3KMX3|J3KMX3_HUMAN	K.YIQESQALAKR.S	Y	29.03	1305.7	45.5	653.889	2	12.05	1
sp|P43652|AFAM_HUMAN	I.LSQKFPK.I	Y	28.97	846.496	7.5	424.259	2	10.45	18
tr|G3V2B9|G3V2B9_HUMAN	Q.INDYVEK.G	Y	28.8	879.434	9.4	440.728	2	10.1	1
tr|A0A0G2JRN3|A0A0G2JRN3_HUMAN	Q.INDYVEK.G	Y	28.8	879.434	9.4	440.728	2	10.1	1
tr|A0A024R6I7|A0A024R6I7_HUMAN	Q.INDYVEK.G	Y	28.8	879.434	9.4	440.728	2	10.1	1
sp|P01009|A1AT_HUMAN	Q.INDYVEK.G	Y	28.8	879.434	9.4	440.728	2	10.1	1
sp|Q03181|PPARD_HUMAN	R.ELTEFAK.S	Y	28.73	836.428	3.4	419.223	2	14.15	1
sp|Q07869|PPARA_HUMAN	T.ELTEFAK.A	Y	28.73	836.428	3.4	419.223	2	14.15	1
sp|O60391|NMD3B_HUMAN	R.TVSSKTPK.C	Y	28.41	846.481	24.1	424.258	2	15.13	20
tr|A0A0G2JL54|A0A0G2JL54_HUMAN	K.VLREDSR.A	Y	28.23	873.467	9.8	437.745	2	4.58	1
tr|A0A140TA32|A0A140TA32_HUMAN	K.VLREDSR.A	Y	28.23	873.467	9.8	437.745	2	4.58	1
tr|A0A140TA49|A0A140TA49_HUMAN	K.VLREDSR.A	Y	28.23	873.467	9.8	437.745	2	4.58	1
tr|A0A0G2JPR0|A0A0G2JPR0_HUMAN	K.VLREDSR.A	Y	28.23	873.467	9.8	437.745	2	4.58	1
tr|A0A140TA29|A0A140TA29_HUMAN	K.VLREDSR.A	Y	28.23	873.467	9.8	437.745	2	4.58	1
tr|A0A140TA44|A0A140TA44_HUMAN	K.VLREDSR.A	Y	28.23	873.467	9.8	437.745	2	4.58	1
tr|F5GXS0|F5GXS0_HUMAN	K.VLREDSR.A	Y	28.23	873.467	9.8	437.745	2	4.58	1
sp|P0C0L4|CO4A_HUMAN	K.VLREDSR.A	Y	28.23	873.467	9.8	437.745	2	4.58	1
sp|P0C0L5|CO4B_HUMAN	K.VLREDSR.A	Y	28.23	873.467	9.8	437.745	2	4.58	1
tr|E7EQB2|E7EQB2_HUMAN	A.PNHAVVSR.M	Y	28.22	878.472	8.4	440.247	2	6.47	1
tr|E7ER44|E7ER44_HUMAN	A.PNHAVVSR.M	Y	28.22	878.472	8.4	440.247	2	6.47	1
sp|P02788|TRFL_HUMAN	A.PNHAVVSR.M	Y	28.22	878.472	8.4	440.247	2	6.47	1
tr|G3V3A0|G3V3A0_HUMAN	K.ADLSGITGA.R	Y	27.67	803.403	46.9	402.727	2	12.57	1
sp|P01011|AACT_HUMAN	K.ADLSGITGA.R	Y	27.67	803.403	46.9	402.727	2	12.57	1
sp|P02771|FETA_HUMAN	R.ETFM(+15.99)NKFIYEIARR.H	Y	27.59	1832.92	-94.3	917.383	2	15.68	2	Oxidation (M)
tr|J3KMX3|J3KMX3_HUMAN	R.ETFM(+15.99)NKFIYEIARR.H	Y	27.59	1832.92	-94.3	917.383	2	15.68	2	Oxidation (M)
tr|A8MZB2|A8MZB2_HUMAN	G.KAEGSVAR.E	Y	27.39	816.445	24	409.24	2	15.25	9
sp|P61599|NAA20_HUMAN	G.KAEGSVAR.E	Y	27.39	816.445	24	409.24	2	15.25	9
sp|P02749|APOH_HUMAN	K.VSFFC(+57.02)K.N	Y	27.36	786.373	2.8	394.195	2	17.38	1	Carbamidomethylation
sp|Q8NGI9|OR5A2_HUMAN	Y.GYIVAAVVK.I	Y	27.09	918.554	15.7	460.291	2	20.53	1
sp|P02787|TRFE_HUMAN	R.C(+57.02)LVEKGDVAFVK(+42.01)HQTVPQN(+.98)TGGKNPDPWAK.N	Y	26.83	3362.67	53.3	841.72	4	22.51	1	Carbamidomethylation; Acetylation (K); Deamidation (NQ)
tr|A0A0C4DGB6|A0A0C4DGB6_HUMAN	K.C(+57.02)ASLQK.F	N	26.48	705.348	-5.4	353.679	2	8.22	45	Carbamidomethylation
sp|P02768|ALBU_HUMAN	K.C(+57.02)ASLQK.F	N	26.48	705.348	-5.4	353.679	2	8.22	45	Carbamidomethylation
tr|H0YA55|H0YA55_HUMAN	K.C(+57.02)ASLQK.F	N	26.48	705.348	-5.4	353.679	2	8.22	45	Carbamidomethylation
tr|D6RHD5|D6RHD5_HUMAN	K.C(+57.02)ASLQK.F	N	26.48	705.348	-5.4	353.679	2	8.22	45	Carbamidomethylation
tr|B7WNR0|B7WNR0_HUMAN	K.C(+57.02)ASLQK.F	N	26.48	705.348	-5.4	353.679	2	8.22	45	Carbamidomethylation
sp|P02656|APOC3_HUMAN	V.QESQVAQQAR.G	Y	26.2	1143.56	94.7	572.843	2	16.27	1
tr|B0YIW2|B0YIW2_HUMAN	V.QESQVAQQAR.G	Y	26.2	1143.56	94.7	572.843	2	16.27	1
tr|Q5T985|Q5T985_HUMAN	K.GKTAGLVR.S	Y	26.11	800.487	1.5	401.251	2	7.61	2
tr|A0A087WTE1|A0A087WTE1_HUMAN	K.GKTAGLVR.S	Y	26.11	800.487	1.5	401.251	2	7.61	2
sp|P19823|ITIH2_HUMAN	K.GKTAGLVR.S	Y	26.11	800.487	1.5	401.251	2	7.61	2
tr|Q5T987|Q5T987_HUMAN	K.GKTAGLVR.S	Y	26.11	800.487	1.5	401.251	2	7.61	2
sp|Q9UM47|NOTC3_HUMAN	R.C(+57.02)EADINEC(+57.02)R.S	Y	26.11	1165.45	71.8	583.774	2	11.59	2	Carbamidomethylation
tr|M0R3C9|M0R3C9_HUMAN	R.C(+57.02)EADINEC(+57.02)R.S	Y	26.11	1165.45	71.8	583.774	2	11.59	2	Carbamidomethylation
tr|K7ERJ6|K7ERJ6_HUMAN	S.AIVPLIIR.S	Y	25.98	893.606	16.6	447.818	2	10.71	5
sp|Q9H7M6|ZSWM4_HUMAN	S.AIVPLIIR.S	Y	25.98	893.606	16.6	447.818	2	10.71	5
tr|G3XAP6|G3XAP6_HUMAN	N.TDEDK(+42.01)WGDAC(+57.02)DNC(+57.02)R.S	Y	25.73	1782.66	58.1	892.388	2	9.71	1	Acetylation (K); Carbamidomethylation
sp|P49747|COMP_HUMAN	N.TDEDK(+42.01)WGDAC(+57.02)DNC(+57.02)R.S	Y	25.73	1782.66	58.1	892.388	2	9.71	1	Acetylation (K); Carbamidomethylation
tr|E7EQB2|E7EQB2_HUMAN	S.C(+57.02)HTAVDR.T	Y	25.61	857.381	8.2	429.702	2	3.18	4	Carbamidomethylation
tr|E7ER44|E7ER44_HUMAN	S.C(+57.02)HTAVDR.T	Y	25.61	857.381	8.2	429.702	2	3.18	4	Carbamidomethylation
sp|P02788|TRFL_HUMAN	S.C(+57.02)HTAVDR.T	Y	25.61	857.381	8.2	429.702	2	3.18	4	Carbamidomethylation
tr|A0A0C4DGB6|A0A0C4DGB6_HUMAN	Q.LC(+57.02)VLHEK.T	N	24.25	897.474	18	449.752	2	10.37	1	Carbamidomethylation
sp|P02768|ALBU_HUMAN	Q.LC(+57.02)VLHEK.T	N	24.25	897.474	18	449.752	2	10.37	1	Carbamidomethylation
tr|H0YA55|H0YA55_HUMAN	Q.LC(+57.02)VLHEK.T	N	24.25	897.474	18	449.752	2	10.37	1	Carbamidomethylation
tr|D6RHD5|D6RHD5_HUMAN	Q.LC(+57.02)VLHEK.T	N	24.25	897.474	18	449.752	2	10.37	1	Carbamidomethylation
tr|B7WNR0|B7WNR0_HUMAN	Q.LC(+57.02)VLHEK.T	N	24.25	897.474	18	449.752	2	10.37	1	Carbamidomethylation
tr|A0A087WWT3|A0A087WWT3_HUMAN	Q.LC(+57.02)VLHEK.T	N	24.25	897.474	18	449.752	2	10.37	1	Carbamidomethylation
tr|A0A087WTM7|A0A087WTM7_HUMAN	R.HSITNPLAVLC(+57.02)EFISQSIK.S	Y	23.8	2156.13	45	1079.12	2	43.43	1	Carbamidomethylation
sp|P04114|APOB_HUMAN	R.HSITNPLAVLC(+57.02)EFISQSIK.S	Y	23.8	2156.13	45	1079.12	2	43.43	1	Carbamidomethylation
sp|Q96EK5|KBP_HUMAN	R.TKMALT	Y	23.23	663.362	38.1	332.701	2	10.26	1
tr|A0A0C4DGB6|A0A0C4DGB6_HUMAN	K.ALVLIAFAQ(+.98)YLQQC(+57.02)PFEDHVK.L	Y	23.2	2490.26	47.1	831.134	3	35.57	2	Deamidation (NQ); Carbamidomethylation
sp|P02768|ALBU_HUMAN	K.ALVLIAFAQ(+.98)YLQQC(+57.02)PFEDHVK.L	Y	23.2	2490.26	47.1	831.134	3	35.57	2	Deamidation (NQ); Carbamidomethylation
tr|A0A087WWT3|A0A087WWT3_HUMAN	K.ALVLIAFAQ(+.98)YLQQC(+57.02)PFEDHVK.L	Y	23.2	2490.26	47.1	831.134	3	35.57	2	Deamidation (NQ); Carbamidomethylation
tr|H7C013|H7C013_HUMAN	K.ALVLIAFAQ(+.98)YLQQC(+57.02)PFEDHVK.L	Y	23.2	2490.26	47.1	831.134	3	35.57	2	Deamidation (NQ); Carbamidomethylation
sp|Q58DX5|NADL2_HUMAN	N.HLGVPIVQFAYEDIKTLEGPSFLSEAR.F	Y	22.59	3015.57	65	1006.26	3	35.34	16
sp|Q96PQ0|SORC2_HUMAN	F.LLRGGVRVLVALR.D	Y	22.34	1420.94	38.6	711.502	2	29.21	13
tr|B5MED8|B5MED8_HUMAN	F.LLRGGVRVLVALR.D	Y	22.34	1420.94	38.6	711.502	2	29.21	13

## Sheet: caerin1.9_denovo_peps
Peptide	Tag length	ALC (%)	m/z	z	RT	Mass	ppm	PTM	local confidence (%)	tag (>=0%)	mode
HAEDKLLTR	9	99	541.814	2	9.06	1081.59	24.4		97 99 100 99 98 99 99 99 99	HAEDKLLTR	CID
LLGNVLVVVLAR	12	99	633.444	2	34.3	1264.82	40		99 99 99 99 99 100 100 100 99 99 99 98	LLGNVLVVVLAR	CID
DTHKSELAHR	10	99	597.326	2	3.18	1192.6	36.2		98 98 99 99 99 100 99 99 99 99	DTHKSELAHR	CID
LSQKFPKAEFVEVTK	15	98	584.348	3	19.59	1749.97	32.1		98 99 97 96 99 99 99 99 99 99 99 100 99 100 98	LSQKFPKAEFVEVTK	CID
C(+57.02)C(+57.02)TKPESER	9	98	583.767	2	2.83	1165.49	28.8	Carbamidomethylation	98 99 99 99 99 99 98 99 99	C(+57.02)C(+57.02)TKPESER	CID
LKEC(+57.02)C(+57.02)DKPLLEK	12	98	511.61	3	12.52	1531.77	21.8	Carbamidomethylation	97 97 100 99 99 99 99 99 99 99 99 98	LKEC(+57.02)C(+57.02)DKPLLEK	CID
LAVPLLLR	8	98	447.817	2	28.05	893.606	14.1		96 97 99 99 100 100 100 99	LAVPLLLR	CID
TPVSEKVTK	9	98	494.796	2	7.91	987.56	18.5		98 99 100 99 99 98 98 98 97	TPVSEKVTK	CID
QYASSANLHLPK	12	98	443.588	3	14.66	1327.69	40.1		95 99 99 100 99 99 97 99 98 100 100 99	QYASSANLHLPK	CID
HPEYAVSVLLR	11	98	642.383	2	23.23	1282.7	37.9		94 99 100 99 99 98 98 98 99 100 99	HPEYAVSVLLR	CID
EC(+57.02)C(+57.02)DKPLLEK	10	98	646.327	2	11.73	1290.59	33.8	Carbamidomethylation	97 96 99 99 98 97 99 99 99 98	EC(+57.02)C(+57.02)DKPLLEK	CID
TGEERHDC(+57.02)FLAHKK	14	98	576.631	3	8.17	1726.82	29.1	Carbamidomethylation	97 94 99 98 98 96 99 99 99 99 99 98 99 99	TGEERHDC(+57.02)FLAHKK	CID
QKTALVELLK	10	98	571.878	2	22.01	1141.71	30.9		91 98 98 99 99 99 99 99 100 99	QKTALVELLK	CID
LSLSETYDLK	10	98	584.828	2	20.05	1167.6	33.2		95 98 100 99 99 98 99 99 99 95	LSLSETYDLK	CID
LLNKQQDDFGK	11	98	653.368	2	11.35	1304.67	37.7		98 99 98 97 97 95 99 99 99 99 98	LLNKQQDDFGK	CID
SDFASK	6	98	327.655	2	8.86	653.302	-11		96 99 99 99 100 99	SDFASK	CID
SELAHR	6	98	356.689	2	3.35	711.366	-4.2		93 98 99 99 99 99	SELAHR	CID
HKSELAHR	8	98	489.278	2	2.86	976.52	21		94 98 99 99 98 99 99 99	HKSELAHR	CID
KYASSANLHLPK	12	98	443.59	3	14.57	1327.72	17.6		93 99 99 99 99 99 97 99 98 100 99 99	KYASSANLHLPK	CID
VKVDEVGGEALGR	13	97	664.887	2	15.29	1327.71	38.1		94 98 100 100 100 99 97 95 99 98 98 96 97	VKVDEVGGEALGR	CID
TC(+57.02)VADESHAGC(+57.02)EK	13	97	732.332	2	7.09	1462.58	46	Carbamidomethylation	92 99 100 100 100 100 99 99 99 96 97 98 91	TC(+57.02)VADESHAGC(+57.02)EK	CID
MLSAEEKAALTSLFAK	16	97	570.659	3	27.11	1708.91	28.1		91 99 98 96 98 99 99 99 100 100 99 97 98 95 98 97	MLSAEEKAALTSLFAK	CID
C(+57.02)LASLAK	7	97	381.712	2	12.61	761.41	-1.6	Carbamidomethylation	93 99 99 99 99 99 96	C(+57.02)LASLAK	CID
AALTLDEK	8	97	430.745	2	13.42	859.465	11.2		98 99 100 99 99 99 99 90	AALTLDEK	CID
AHVETLR	7	97	413.235	2	7.95	824.45	6.6		95 96 99 99 98 98 97	AHVETLR	CID
VVTGVANALAHR	12	97	604.369	2	16.41	1206.68	32.5		97 97 99 98 99 98 93 95 99 99 99 99	VVTGVANALAHR	CID
LVNELTEFAK	10	97	582.338	2	22.32	1162.62	32.1		95 97 98 99 98 97 99 97 99 95	LVNELTEFAK	CID
ALGGEDVR	8	97	408.715	2	9.2	815.414	2.4		95 98 97 95 99 99 99 99	ALGGEDVR	CID
KTRLPEVFLTK	11	97	444.612	3	19.84	1330.8	12.3		94 95 98 98 95 98 99 99 100 100 99	KTRLPEVFLTK	CID
AAVTSLFAK	9	97	454.272	2	20.42	906.518	14		97 98 99 99 95 97 98 98 97	AAVTSLFAK	CID
HLVDEPQNLLK	11	97	653.386	2	18.79	1304.71	37.5		94 100 100 100 100 96 94 95 98 100 99	HLVDEPQNLLK	CID
ALTVTK	6	97	316.697	2	8.74	631.39	-18.2		95 98 98 98 99 98	ALTVTK	CID
LPEVFLTK	8	97	473.794	2	22.51	945.553	20.5		98 97 99 98 97 99 98 94	LPEVFLTK	CID
TAGLVR	6	97	308.688	2	8.59	615.37	-15.6		96 97 96 99 99 99	TAGLVR	CID
RLQGHAVQETDDTSHKEAAC(+57.02)HK	22	97	630.309	4	11.2	2517.18	12.1	Carbamidomethylation	96 100 98 97 97 99 100 99 100 100 99 99 97 96 94 93 97 96 98 98 95 95	RLQGHAVQETDDTSHKEAAC(+57.02)HK	CID
VLLVDGK	7	97	372.235	2	15.2	742.459	-3.5		95 98 99 99 99 97 94	VLLVDGK	CID
VLSAADKGNVK	11	97	551.33	2	8.67	1100.62	24.8		98 99 100 100 99 99 99 96 94 96 92	VLSAADKGNVK	CID
DSVKVWPR	8	97	493.785	2	19.73	985.534	20.5		95 96 98 98 98 96 98 99	DSVKVWPR	CID
C(+57.02)LASLAKK	8	97	445.765	2	10.26	889.505	11	Carbamidomethylation	92 99 99 98 99 98 97 97	C(+57.02)LASLAKK	CID
GPQLTR	6	97	336.192	2	7.84	670.376	-9.6		98 98 98 99 98 94	GPQLTR	CID
LGEYGFQDALLVR	13	97	740.928	2	25.78	1479.77	46.1		89 86 99 99 99 100 98 99 99 99 99 99 99	LGEYGFQDALLVR	CID
HTLNQLDSVK	10	97	577.827	2	12.44	1153.61	27.1		95 99 99 97 94 97 99 98 98 95	HTLNQLDSVK	CID
THTELLK	7	97	421.247	2	9.88	840.471	10.5		96 94 97 97 98 99 98	THTELLK	CID
SPLFVGK	7	97	374.224	2	15.99	746.433	-0.2		95 95 97 98 99 99 97	SPLFVGK	CID
SSANLHLPK	9	97	483.78	2	16	965.529	16		97 98 99 96 97 95 99 93 98	SSANLHLPK	CID
LC(+57.02)VLHEKTPVSEK	13	97	513.956	3	14.67	1538.81	22.5	Carbamidomethylation	98 99 100 100 100 100 99 99 95 93 92 97 91	LC(+57.02)VLHEKTPVSEK	CID
FEKTQEELTPFFK	13	97	822.462	2	23.89	1642.82	52.2		86 95 97 98 97 99 99 99 99 97 99 99 96	FEKTQEELTPFFK	CID
GPNHAVVSR	9	97	468.76	2	6.47	935.494	12.8		90 93 97 98 99 99 99 98 99	GPNHAVVSR	CID
AEFVEVTK	8	97	461.754	2	14.86	921.481	12.9		90 97 98 97 99 98 99 97	AEFVEVTK	CID
THKSELAHR	9	97	539.805	2	2.97	1077.57	25.4		96 97 99 99 99 98 98 97 99	THKSELAHR	CID
LC(+57.02)PGR	5	97	301.652	2	9.76	601.301	-18.8	Carbamidomethylation	98 98 97 97 98	LC(+57.02)PGR	CID
ATEEQLK	7	97	409.719	2	10.22	817.418	7.1		95 98 100 99 96 99 97	ATEEQLK	CID
KKTALVELLK	10	97	571.88	2	22.34	1141.74	2.1		89 98 98 98 99 98 99 98 100 99	KKTALVELLK	CID
WFLGSFLYEYSR	12	97	784.417	2	25.18	1566.75	44		85 97 100 99 100 99 100 99 99 97 96 97	WFLGSFLYEYSR	CID
ATEEKLKTVMENFVAFVGK	19	97	714.404	3	33.8	2140.12	30.6		89 93 99 99 96 99 98 98 99 99 100 99 99 98 98 98 98 96 93	ATEEKLKTVMENFVAFVGK	CID
TPVSEK	6	97	330.678	2	3.8	659.349	-11.4		97 97 99 98 99 93	TPVSEK	CID
FALVR	5	97	303.186	2	16.4	604.37	-19.2		95 97 99 99 99	FALVR	CID
LETMR	5	97	325.167	2	7.55	648.327	-11.4		95 99 98 97 98	LETMR	CID
KPVTDAENC(+57.02)HLAR	13	97	504.267	3	9.55	1509.74	27.7	Carbamidomethylation	93 98 99 99 99 99 99 97 98 96 95 95 96	KPVTDAENC(+57.02)HLAR	CID
ASEKLKALGEK	11	97	587.351	2	12.25	1172.68	9		95 98 100 97 99 98 99 99 93 98 91	ASEKLKALGEK	CID
YASSANLHLPK	11	96	600.842	2	15.96	1199.63	33.1		94 99 99 98 95 89 96 97 100 100 99	YASSANLHLPK	CID
LSMLDKLYLHPR	12	96	743.45	2	22.83	1484.82	46.4		91 96 95 98 99 98 99 97 98 95 96 98	LSMLDKLYLHPR	CID
LGEYGFQNELLVR	13	96	769.44	2	25.43	1536.79	46.8		92 84 99 99 99 100 98 94 98 98 99 99 99	LGEYGFQNELLVR	CID
HTKLAVPLLLR	11	96	630.935	2	23.66	1259.81	37.3		93 99 99 99 99 99 85 95 99 100 99	HTKLAVPLLLR	CID
GSELQTQAK	9	96	481.26	2	7.22	960.488	18.9		90 96 100 100 98 98 96 98 96	GSELQTQAK	CID
VLDKYLFELSR	11	96	691.898	2	27.91	1381.76	14.6		94 98 99 97 99 100 99 99 97 93 89	VLDKYLFELSR	CID
YLC(+57.02)DNQDTLSSK	12	96	722.355	2	11.8	1442.63	42.4	Carbamidomethylation	92 97 99 100 98 96 99 97 97 97 97 94	YLC(+57.02)DNQDTLSSK	CID
FAHNVVTTR	9	96	522.794	2	10.8	1043.55	21		93 97 98 98 99 99 98 96 93	FAHNVVTTR	CID
LLTEDLYQPR	10	96	624.357	2	19.9	1246.66	35.1		96 99 99 99 98 97 97 90 95 97	LLTEDLYQPR	CID
GNTHTELLK	9	96	506.785	2	9.9	1011.53	19.6		85 94 98 99 98 99 99 100 99	GNTHTELLK	CID
HTLNQLDSVKVWPR	14	96	564.994	3	20.54	1691.91	29.7		94 99 99 97 96 99 99 99 99 97 96 88 92 99	HTLNQLDSVKVWPR	CID
FKDLGEEHFK	10	96	625.335	2	13.78	1248.61	33.7		88 96 99 99 94 99 100 98 98 96	FKDLGEEHFK	CID
HLEVDVR	7	96	434.242	2	12.77	866.461	9.3		91 98 98 95 98 99 97	HLEVDVR	CID
YSLVFLAR	8	96	484.789	2	24.55	967.549	15.6		95 97 99 99 99 99 94 90	YSLVFLAR	CID
LYGNQDTSVQLKK	13	96	498.613	3	13.32	1492.79	19.2		98 99 98 97 97 98 97 96 95 95 97 95 94	LYGNQDTSVQLKK	CID
LSHLLK	6	96	355.73	2	10.43	709.449	-3.6		95 95 95 98 99 97	LSHLLK	CID
QDLGEEHFK	9	96	368.187	3	13.81	1101.51	28.5		90 99 99 95 98 99 98 98 93	QDLGEEHFK	CID
C(+57.02)LVER	5	96	338.673	2	8.59	675.337	-8.3	Carbamidomethylation	90 98 98 99 98	C(+57.02)LVER	CID
ALFYLNKEKR	10	96	427.919	3	14.7	1280.72	8.5		94 97 99 99 98 95 96 97 95 95	ALFYLNKEKR	CID
LVELVK	6	96	350.731	2	15.7	699.453	-6.6		97 97 99 97 98 91	LVELVK	CID
ATVLYEWR	8	96	519.278	2	12.98	1036.53	6.2		92 95 99 100 99 98 93 97	ATVLYEWR	CID
C(+57.02)ASLQKLR	8	96	488.281	2	10.11	974.533	15.8	Carbamidomethylation	96 99 99 99 97 93 95 94	C(+57.02)ASLQKLR	CID
SAADKGNVK	9	96	445.245	2	8.66	888.466	9.7		94 97 99 99 98 96 96 97 92	SAADKGNVK	CID
VFFKGSELVVAGK	13	96	690.927	2	21.87	1379.78	41.7		94 96 98 98 95 96 96 95 96 97 98 96 97	VFFKGSELVVAGK	CID
LVTDLTKVHK	10	96	577.368	2	14.44	1152.69	29.5		97 98 99 99 97 92 92 94 98 98	LVTDLTKVHK	CID
FFKKFFKKFFKK	12	96	418.26	4	19.28	1668.99	11.1		94 94 97 99 99 97 93 98 97 96 97 96	FFKKFFKKFFKK	CID
HTLNLQDSVK	10	96	577.829	2	12.49	1153.61	29.1		95 99 99 96 94 92 99 98 98 94	HTLNLQDSVK	CID
QTALVELLK	9	96	507.826	2	25.26	1013.61	24.2		81 95 99 99 97 99 99 100 98	QTALVELLK	CID
AGALC(+57.02)LSR	8	96	424.229	2	13.76	846.438	6.2	Carbamidomethylation	92 93 99 99 97 99 97 95	AGALC(+57.02)LSR	CID
LLESTLK	7	96	402.245	2	13.82	802.48	-6.5		98 98 99 95 95 98 90	LLESTLK	CID
TKEELTPFFK	10	96	620.337	2	24.21	1238.65	3.7		87 91 99 99 99 99 97 97 99 96	TKEELTPFFK	CID
QNC(+57.02)DKFEKLGEYGFKNALLVR	21	96	843.789	3	28.66	2528.28	24.5	Carbamidomethylation	85 93 98 99 97 97 99 97 98 97 99 100 98 97 95 90 92 97 98 98 98	QNC(+57.02)DKFEKLGEYGFKNALLVR	CID
ALKAWSVAR	9	96	334.532	3	15.35	1000.58	-8.4		93 96 93 97 93 98 99 99 98	ALKAWSVAR	CID
KFWGKYLYELAR	12	96	525.302	3	23.18	1572.85	24.4		91 99 97 96 98 99 100 99 99 97 94 85	KFWGKYLYELAR	CID
ENVLR	5	96	315.677	2	8.09	629.35	-14.9		94 91 98 99 98	ENVLR	CID
VANTVLQTK	9	96	487.295	2	11.42	972.56	16.1		96 98 97 98 99 99 93 92 94	VANTVLQTK	CID
TALVELLK	8	96	443.789	2	24.8	885.553	10.7		90 95 99 98 97 97 98 94	TALVELLK	CID
KAPQLTSPELMALTR	15	96	828.502	2	24.47	1654.91	49.8		93 99 97 97 99 99 99 97 99 98 88 96 97 92 89	KAPQLTSPELMALTR	CID
LFETR	5	96	333.18	2	10.97	664.354	-13.9		97 97 98 97 92	LFETR	CID
HFSLLTLMTNR	11	96	666.885	2	28.21	1331.7	39.7		92 99 99 100 100 99 99 91 93 92 92	HFSLLTLMTNR	CID
SANLHLPK	8	96	440.26	2	14.61	878.497	9.8		91 94 95 96 96 99 99 98	SANLHLPK	CID
LLESGPFVSC(+57.02)VK	12	96	668.38	2	21.67	1334.69	40.5	Carbamidomethylation	98 99 100 99 97 95 96 99 98 92 91 89	LLESGPFVSC(+57.02)VK	CID
C(+57.02)C(+57.02)AADDKEAC(+57.02)FAVEGPK	17	96	643.293	3	15.62	1926.79	35	Carbamidomethylation	99 99 100 99 99 99 98 99 99 99 97 93 92 96 86 90 90	C(+57.02)C(+57.02)AADDKEAC(+57.02)FAVEGPK	CID
LC(+57.02)QLC(+57.02)AGK	8	96	475.24	2	10.88	948.452	15.2	Carbamidomethylation	95 96 97 98 96 96 94 96	LC(+57.02)QLC(+57.02)AGK	CID
KSDLLFRDDTK	11	96	669.382	2	14.39	1336.7	37.8		79 97 99 99 100 98 97 97 97 97 95	KSDLLFRDDTK	CID
WLSGLTKEQPLKVSK	15	96	857.535	2	18.61	1712.98	43		82 97 96 95 99 98 94 97 95 95 97 98 99 99 98	WLSGLTKEQPLKVSK	CID
WHEEVELYR	9	96	630.823	2	17.26	1259.59	30.3		84 95 99 99 97 99 98 96 97	WHEEVELYR	CID
DLGEEHFK	8	96	487.74	2	11.67	973.451	15		93 96 95 99 99 95 97 94	DLGEEHFK	CID
C(+57.02)TEDYLSLLLNR	12	96	748.908	2	30.27	1495.73	45.2	Carbamidomethylation	90 98 100 100 99 99 98 98 98 95 90 86	C(+57.02)TEDYLSLLLNR	CID
LLESGPFVSC(+57.02)VKK	13	96	488.613	3	19.38	1462.79	21.1	Carbamidomethylation	99 99 100 99 98 97 98 99 95 88 88 95 93	LLESGPFVSC(+57.02)VKK	CID
DPERTVR	7	96	436.739	2	8.14	871.451	13.1		98 93 96 94 98 99 98	DPERTVR	CID
LLDNWDTLASTLSK	14	96	788.957	2	10.68	1575.81	53.5		88 86 99 98 97 99 99 99 99 98 97 97 97 96	LLDNWDTLASTLSK	CID
LC(+57.02)VLHEKTPVSEKVTK	16	96	467.772	4	10.38	1867.02	19.8	Carbamidomethylation	98 98 99 99 96 98 98 98 98 98 94 94 88 93 97 97	LC(+57.02)VLHEKTPVSEKVTK	CID
GSVLQK	6	96	316.187	2	10.11	630.37	-18.1		90 97 97 99 97 97	GSVLQK	CID
AFDEK	5	96	305.141	2	9.12	608.281	-20.9		95 97 99 99 91	AFDEK	CID
VLTSSAR	7	96	367.214	2	10.27	732.413	0.3		96 98 99 98 97 96 89	VLTSSAR	CID
QTKLPEVFLTK	11	96	652.425	2	22.63	1302.75	61.7		86 96 96 99 96 98 98 99 99 99 97	QTKLPEVFLTK	CID
ATVKVVGGLK	10	96	486.31	2	16.86	970.617	-12.7		94 97 99 97 98 98 96 93 98 95	ATVKVVGGLK	CID
LC(+57.02)KLC(+57.02)AGK	8	96	475.245	2	10.84	948.489	-13.2	Carbamidomethylation	97 96 94 98 96 98 96 97	LC(+57.02)KLC(+57.02)AGK	CID
ASEQLKALGEK	11	95	587.345	2	12.4	1172.64	29.6		95 95 99 98 99 98 98 99 89 97 88	ASEQLKALGEK	CID
LKASFLPPLEK	11	95	621.896	2	22.91	1241.74	31		93 95 98 97 96 99 99 96 97 98 87	LKASFLPPLEK	CID
ATVKVVAGLK	10	95	493.314	2	18.34	984.633	-19.4		91 95 98 96 98 98 97 90 98 95	ATVKVVAGLK	CID
FTYEYSR	7	95	483.231	2	13.48	964.429	18		95 97 99 99 96 95 89	FTYEYSR	CID
RLLPR	5	95	327.719	2	12.71	653.434	-14.3		90 93 98 99 98	RLLPR	CID
TVMENFVAFVGK	12	95	671.374	2	28.77	1340.68	40.3		78 92 96 100 98 98 99 99 99 98 96 95	TVMENFVAFVGK	CID
ELFLNR	6	95	396.225	2	16.8	790.434	2.6		93 94 98 98 95 95	ELFLNR	CID
LETMREKVLTSSAR	14	95	540.976	3	13.73	1619.87	23.6		98 99 99 88 97 97 95 99 100 99 97 92 91 90	LETMREKVLTSSAR	CID
AMTNLRQC(+57.02)STSK	12	95	698.864	2	9.17	1395.66	38.6	Carbamidomethylation	90 88 97 96 98 97 95 96 95 97 99 98	AMTNLRQC(+57.02)STSK	CID
SAGWNLPMGK	10	95	530.779	2	20.49	1059.52	25.2		89 95 96 96 96 99 98 92 97 97	SAGWNLPMGK	CID
QDGKFSVLFTK	11	95	635.349	2	24.12	1268.68	5.7		84 98 94 92 98 96 96 99 98 99 97	QDGKFSVLFTK	CID
RLSELAAWSR	10	95	594.844	2	17.16	1187.64	26.6		89 97 97 99 99 98 97 90 95 93	RLSELAAWSR	CID
SNSFVYLEPLPR	12	95	711.406	2	26.32	1420.74	43.6		79 90 98 99 100 99 99 99 95 97 93 97	SNSFVYLEPLPR	CID
TSDANLNWNNLK	12	95	695.371	2	19.26	1388.67	42.7		87 95 99 99 99 99 98 96 94 93 98 90	TSDANLNWNNLK	CID
NKEC(+57.02)C(+57.02)DKPLLEK	12	95	511.943	3	12.48	1532.73	48.5	Carbamidomethylation	84 95 99 98 97 98 98 95 96 96 98 93	NKEC(+57.02)C(+57.02)DKPLLEK	CID
ALKLR	5	95	300.705	2	9.43	599.412	-27.1		93 96 92 99 97	ALKLR	CID
HLGAYELLLK	10	95	578.858	2	23.82	1155.66	31.6		92 99 93 97 85 92 99 100 100 99	HLGAYELLLK	CID
DPSGFSPEVQK	11	95	595.807	2	14.33	1189.56	31.2		96 95 98 98 99 99 92 96 93 94 89	DPSGFSPEVQK	CID
DPTEKQLKK	9	95	543.825	2	24.31	1085.61	25.7		97 90 97 99 93 92 98 96 97	DPTEKQLKK	CID
QFWGKYLYELAR	12	95	525.302	3	23.22	1572.81	47.9		88 98 95 94 98 98 99 98 98 96 94 89	QFWGKYLYELAR	CID
LYKELPDPQESLQR	14	95	572.654	3	18.53	1714.89	30.1		96 95 94 95 97 97 99 99 98 98 96 93 86 92	LYKELPDPQESLQR	CID
FPKAEFVEVTK	11	95	647.882	2	19.75	1293.7	40.6		89 91 97 98 98 94 96 98 96 98 95	FPKAEFVEVTK	CID
LGKVGTR	7	95	365.732	2	7.25	729.45	-0.6		96 93 95 98 94 97 94	LGKVGTR	CID
TSLTKELR	8	95	474.286	2	13.57	946.545	13.1		94 95 99 98 94 98 94 91	TSLTKELR	CID
LTPETLTR	8	95	465.773	2	14.5	929.518	15.1		95 96 97 99 98 97 92 88	LTPETLTR	CID
EVVDPTKC(+57.02)NLLAEK	14	95	539.298	3	19.3	1614.83	26	Carbamidomethylation	92 90 97 99 98 98 97 96 92 98 98 97 98 83	EVVDPTKC(+57.02)NLLAEK	CID
DKDLSMAR	8	95	468.24	2	9.01	934.454	12.7		95 95 99 99 98 88 94 94	DKDLSMAR	CID
VLHEKTPVSEKVTK	14	95	532.322	3	14.83	1593.91	22.3		94 97 97 99 95 97 97 98 93 92 92 96 95 92	VLHEKTPVSEKVTK	CID
HYDLR	5	95	352.178	2	8.55	702.345	-5.8		86 96 98 99 98	HYDLR	CID
VSESLSLKLPPNVVEESAR	19	95	685.403	3	25.52	2053.11	40.4		92 95 98 94 95 98 99 99 100 99 97 97 98 98 98 97 86 85 86	VSESLSLKLPPNVVEESAR	CID
LFTFHADLC(+57.02)TLPDTEK	16	95	636.669	3	26.21	1906.91	37.5	Carbamidomethylation	97 97 98 95 94 98 99 98 98 99 99 91 94 90 96 82	LFTFHADLC(+57.02)TLPDTEK	CID
YGLVTYATEPK	11	95	621.345	2	18.96	1240.63	32.7		92 92 99 99 99 95 95 93 97 93 94	YGLVTYATEPK	CID
TDLTKVHK	8	95	471.281	2	14.42	940.534	15.1		94 97 99 97 91 92 97 95	TDLTKVHK	CID
TC(+57.02)VDLNEC(+57.02)R	9	95	583.767	2	11.63	1165.49	28.5	Carbamidomethylation	86 95 99 99 96 92 97 97 96	TC(+57.02)VDLNEC(+57.02)R	CID
ALDMEDFKTEVSLAPQK	17	95	641.347	3	24.95	1920.95	35.8		91 96 99 98 99 99 97 97 97 99 99 98 97 94 79 84 94	ALDMEDFKTEVSLAPQK	CID
FMETATESLAK	11	95	614.32	2	17.25	1226.59	33.4		92 92 100 99 99 98 98 93 92 93 90	FMETATESLAK	CID
EKVLTSSAR	9	95	495.793	2	7.51	989.551	20.5		92 94 99 100 99 98 93 91 91	EKVLTSSAR	CID
LLEPQGLR	8	95	463.284	2	16.25	924.539	15.9		98 99 100 95 92 85 96 95	LLEPQGLR	CID
VADESHAGC(+57.02)EK	11	95	601.777	2	7.12	1201.5	29.5	Carbamidomethylation	93 96 99 100 98 95 98 95 91 97 85	VADESHAGC(+57.02)EK	CID
LREQSPDVLLAQLR	14	95	819.512	2	24.29	1636.93	50.5		90 95 96 95 97 95 97 98 99 97 94 90 94 95	LREQSPDVLLAQLR	CID
KLAER	5	95	308.687	2	2.57	615.37	-16.7		90 99 94 99 94	KLAER	CID
LSALAAGDGSGYTC(+57.02)R	15	95	749.886	2	15.63	1497.69	46.9	Carbamidomethylation	89 93 98 99 99 99 98 99 94 97 86 93 94 93 92	LSALAAGDGSGYTC(+57.02)R	CID
VSEKVTK	7	95	395.735	2	4.52	789.46	-4.5		94 96 97 91 97 98 94	VSEKVTK	CID
LNDYVEKGSHGK	12	95	673.862	2	7.91	1345.66	35.6		91 94 99 99 99 99 95 88 92 90 97 98	LNDYVEKGSHGK	CID
QLLYK	5	95	332.7	2	12.36	663.396	-14.6		85 97 98 99 96	QLLYK	CID
LAQAAFFYLEPR	12	95	713.411	2	29.8	1424.75	43.9		89 71 96 99 99 99 99 98 93 98 99 99	LAQAAFFYLEPR	CID
LPENVVVKDR	10	95	584.856	2	14.23	1167.66	30.3		99 97 99 96 98 99 97 82 91 92	LPENVVVKDR	CID
AYFEKTQEELTPFFKK	16	95	669.374	3	23.72	2005.02	40.2		92 96 97 96 84 91 96 99 99 99 98 90 93 96 97 97	AYFEKTQEELTPFFKK	CID
FFKKFFKKFFKKFFKK	16	95	740.813	3	23.47	2219.32	44.9		88 92 96 97 96 94 94 98 98 98 96 95 94 93 95 95	FFKKFFKKFFKKFFKK	CID
AFTNSK	6	95	334.171	2	6.06	666.334	-8.7		95 96 95 94 97 98	AFTNSK	CID
LSQKFPK	7	95	424.261	2	10.33	846.496	12.4		95 95 92 93 97 99 98	LSQKFPK	CID
ATEEQLKTVMENFVAFVGK	19	95	714.403	3	34.05	2140.09	46.4		81 92 94 90 91 92 96 98 99 99 100 99 99 97 96 96 97 95 91	ATEEQLKTVMENFVAFVGK	CID
VKDVSEVVTPR	11	95	614.875	2	13.75	1227.68	43.8		81 96 99 99 99 99 98 98 97 94 94	VKDVSEVVTPR	CID
FAHTVLTSR	9	95	516.301	2	12.33	1030.56	29.9		92 96 99 99 99 99 96 93 90	FAHTVLTSR	CID
AALTSLFAK	9	95	461.285	2	23.03	920.533	23.5		95 98 99 98 90 93 96 97 95	AALTSLFAK	CID
VSKKFPK	7	95	417.253	2	8.56	832.517	-30.7		95 96 95 93 96 98 97	VSKKFPK	CID
VLDQYLFELSR	11	95	691.907	2	27.82	1381.72	55		92 96 99 98 99 99 99 99 93 91 85	VLDQYLFELSR	CID
AALTLDTR	8	95	430.747	2	13.42	859.476	3.2		98 99 100 99 98 97 90 82	AALTLDTR	CID
LGGEDVR	7	95	373.196	2	9.15	744.377	1.4		96 92 89 96 98 99 97	LGGEDVR	CID
AKGSELQTQAK	11	95	580.84	2	6.33	1159.62	40.1		90 93 90 97 98 97 95 98 95 98 97	AKGSELQTQAK	CID
YGKHTLNKLDSVKVWPR	17	95	511.046	4	19.6	2040.13	14		89 81 94 96 98 98 97 96 99 99 99 98 98 95 89 95 98	YGKHTLNKLDSVKVWPR	CID
KAWSVAR	7	95	409.242	2	15.16	816.461	11.6		85 98 95 97 97 98 96	KAWSVAR	CID
KEC(+57.02)C(+57.02)DKPLLEK	11	95	473.915	3	12.63	1418.69	23.5	Carbamidomethylation	88 99 98 97 98 95 89 95 96 98 93	KEC(+57.02)C(+57.02)DKPLLEK	CID
ALHLTMPQLTLK	12	95	683.437	2	27.52	1364.78	55		84 96 96 100 99 96 93 93 96 96 97 93	ALHLTMPQLTLK	CID
KTALVELLKHKPK	13	94	753	2	19.56	1503.95	23		79 97 98 100 99 99 99 99 99 97 99 99 69	KTALVELLKHKPK	CID
LFHESVYGQC(+57.02)K	11	94	456.558	3	13.47	1366.63	14.3	Carbamidomethylation	94 93 90 99 97 97 99 96 93 94 91	LFHESVYGQC(+57.02)K	CID
MPC(+57.02)AEDYLSLLLNR	14	94	847.963	2	33.81	1693.82	56.2	Carbamidomethylation	82 92 95 99 100 100 99 99 99 93 95 95 89 90	MPC(+57.02)AEDYLSLLLNR	CID
FFESFGDLSSWALLGNPKVK	20	94	748.086	3	30.51	2241.15	39.8		97 95 100 99 99 95 98 99 99 96 92 96 97 98 90 91 80 86 93 94	FFESFGDLSSWALLGNPKVK	CID
SLGKVGTR	8	94	409.251	2	7.36	816.482	6.6		92 97 94 95 98 94 95 92	SLGKVGTR	CID
ATSLVKWLSK	10	94	566.857	2	20.44	1131.67	29.7		89 95 97 99 97 92 88 97 98 95	ATSLVKWLSK	CID
LVELLKHQPK	10	94	402.266	3	17.48	1203.73	35		97 97 99 99 98 96 93 75 97 97	LVELLKHQPK	CID
MPC(+57.02)TEDYLSLLLNR	14	94	862.969	2	32.31	1723.83	56.2	Carbamidomethylation	83 91 94 99 100 100 99 100 99 94 95 93 86 90	MPC(+57.02)TEDYLSLLLNR	CID
VVTVSLPR	8	94	435.779	2	17.33	869.533	10.3		95 94 94 97 95 97 91 95	VVTVSLPR	CID
RHPEYAVSVLLR	12	94	720.442	2	20.89	1438.8	45.5		89 98 96 98 97 96 82 85 96 98 100 99	RHPEYAVSVLLR	CID
VAVPLPLHR	9	94	501.327	2	24.06	1000.62	20.3		87 93 97 94 97 95 97 93 97	VAVPLPLHR	CID
FLEKKYASSANLHLPK	16	94	462.268	4	17.98	1845.01	15.3		95 97 98 91 93 96 92 91 90 90 91 96 96 99 98 98	FLEKKYASSANLHLPK	CID
QDGQFSVLFTK	11	94	635.349	2	24.17	1268.64	34.7		73 97 93 95 98 95 95 99 97 98 97	QDGQFSVLFTK	CID
ALFYLNKEK	9	94	563.333	2	16.72	1124.62	25.5		92 97 99 99 98 92 93 97 83	ALFYLNKEK	CID
YNSESPSKQYSLVK	14	94	815.452	2	14.13	1628.8	51.8		92 92 98 99 99 91 90 90 95 95 96 95 97 90	YNSESPSKQYSLVK	CID
HRSPVEDVC(+57.02)TAKPR	14	94	413.717	4	10.73	1650.83	7.4	Carbamidomethylation	79 92 93 86 93 99 99 98 98 98 98 96 96 95	HRSPVEDVC(+57.02)TAKPR	CID
KTYDSYLGDDYVR	13	94	797.911	2	17.71	1593.73	48.2		61 80 98 100 99 99 100 98 99 99 97 97 98	KTYDSYLGDDYVR	CID
LYLLEC(+57.02)K	7	94	469.761	2	19.62	937.494	14.6	Carbamidomethylation	92 95 99 97 98 96 84	LYLLEC(+57.02)K	CID
ADLSGLTKEQPLKVSK	16	94	572.013	3	18.64	1712.97	29		91 97 99 99 96 97 97 94 96 94 81 92 92 95 96 93	ADLSGLTKEQPLKVSK	CID
TSWKNC(+57.02)EVR	9	94	590.3	2	9.91	1178.55	29.4	Carbamidomethylation	86 93 94 94 93 95 98 98 99	TSWKNC(+57.02)EVR	CID
LLSVLGSVAK	10	94	493.827	2	23.71	985.617	22		97 98 98 98 97 88 92 92 95 90	LLSVLGSVAK	CID
VLTSDAR	7	94	381.211	2	7.89	760.408	-0.7		96 98 98 93 95 93 87	VLTSDAR	CID
YGKHTLNQLDSVKVWPR	17	94	511.043	4	19.69	2040.09	24.7		87 79 93 95 98 98 96 96 99 99 99 95 94 93 88 94 98	YGKHTLNQLDSVKVWPR	CID
ESSLLNQHLC(+57.02)AVMGK	15	94	843.964	2	21.99	1685.82	53.5	Carbamidomethylation	86 90 96 99 99 94 92 94 98 96 96 97 90 95 93	ESSLLNQHLC(+57.02)AVMGK	CID
C(+57.02)C(+57.02)AWDKEAC(+57.02)FAVEGPK	16	94	964.46	2	15.68	1926.81	51.9	Carbamidomethylation	95 93 95 90 98 97 99 98 96 96 96 91 96 85 92 91	C(+57.02)C(+57.02)AWDKEAC(+57.02)FAVEGPK	CID
LFTFHADLC(+57.02)TLPDTEKQLK	19	94	570.063	4	25.72	2276.15	32.5	Carbamidomethylation	98 98 98 93 92 95 96 96 97 97 99 94 95 85 91 89 89 94 94	LFTFHADLC(+57.02)TLPDTEKQLK	CID
ADEKKFWGK	9	94	554.808	2	11.14	1107.57	26.5		92 97 99 92 93 95 91 95 94	ADEKKFWGK	CID
C(+57.02)VLHEKTPVSEKVTK	15	94	439.497	4	14.8	1753.94	9.9	Carbamidomethylation	90 97 99 95 98 95 98 95 97 95 92 82 89 94 94	C(+57.02)VLHEKTPVSEKVTK	CID
SELAAWSR	8	94	460.243	2	15.5	918.456	16.9		88 96 99 99 98 93 93 87	SELAAWSR	CID
YERLAR	6	94	404.229	2	15.7	806.44	4.2		90 96 94 93 96 95	YERLAR	CID
ALLYLNTGYQR	11	94	656.382	2	21.58	1310.7	38.6		82 94 99 100 100 98 98 92 88 89 94	ALLYLNTGYQR	CID
LTSSAR	6	94	317.674	2	6.7	633.345	-17.4		96 96 95 94 95 88	LTSSAR	CID
LSAADKGNVK	10	94	501.792	2	8.71	1001.55	19.7		96 97 99 98 97 94 88 91 94 85	LSAADKGNVK	CID
AQFLLQGDAC(+57.02)VK	12	94	675.375	2	20.34	1348.68	39.8	Carbamidomethylation	79 89 97 99 99 97 94 98 94 92 95 93	AQFLLQGDAC(+57.02)VK	CID
ALKAWDVAR	9	94	515.307	2	16.21	1028.58	22.6		90 95 94 98 94 93 91 96 95	ALKAWDVAR	CID
WC(+57.02)ALGHQER	9	94	578.787	2	11.38	1155.52	29.9	Carbamidomethylation	79 97 99 99 95 94 95 97 91	WC(+57.02)ALGHQER	CID
AEFVEVTKLVTDLTKVHK	18	94	515.059	4	30.2	2056.16	23.8		92 98 98 97 98 95 92 92 97 96 93 93 93 92 91 92 88 91	AEFVEVTKLVTDLTKVHK	CID
QYGFC(+57.02)KGSVLQK	12	94	472.249	3	14.92	1413.71	13.2	Carbamidomethylation	83 93 94 98 96 95 90 95 92 97 95 96	QYGFC(+57.02)KGSVLQK	CID
QFDLWEHFK	9	94	625.336	2	14.69	1248.59	51.1		86 98 99 96 87 96 93 98 95	QFDLWEHFK	CID
DKATC(+57.02)VEK	8	94	475.743	2	3.47	949.454	18.1	Carbamidomethylation	90 94 98 97 93 94 97 91	DKATC(+57.02)VEK	CID
TAEEKLKTVMENFVAFVGK	19	94	714.404	3	33.9	2140.12	30.7		79 86 99 99 95 98 82 82 99 99 100 99 99 97 97 97 96 94 91	TAEEKLKTVMENFVAFVGK	CID
C(+57.02)ASLQK	6	94	353.68	2	6.42	705.348	-4.9	Carbamidomethylation	92 94 95 95 93 95	C(+57.02)ASLQK	CID
VKVDEVGWALGR	12	94	664.896	2	15.24	1327.72	39.5		85 96 99 100 100 98 91 91 90 95 95 96	VKVDEVGWALGR	CID
FEKTKEELTPFFK	13	94	822.474	2	23.84	1642.86	44.6		84 96 96 98 97 98 98 96 98 89 93 96 92	FEKTKEELTPFFK	CID
VMSYLC(+57.02)SQKDLLSR	14	94	850.47	2	22.01	1698.84	48.1	Carbamidomethylation	86 76 95 99 100 99 99 93 91 98 98 97 97 96	VMSYLC(+57.02)SQKDLLSR	CID
QLKKQTALVELLK	13	94	756.525	2	20.51	1510.94	59.8		82 94 90 97 96 94 93 95 98 97 97 99 98	QLKKQTALVELLK	CID
YNSESPSKKYSLVK	14	94	815.462	2	14.09	1628.84	42		93 93 98 99 99 92 91 92 97 94 95 97 96 89	YNSESPSKKYSLVK	CID
VLHEK	5	94	313.183	2	11.77	624.36	-14.4		95 97 96 99 86	VLHEK	CID
YGKHTLNQLDSVK	13	94	501.618	3	13.23	1501.79	28.4		89 77 96 96 98 99 97 95 99 99 97 97 92	YGKHTLNQLDSVK	CID
ELSSFLQK	8	94	476.273	2	17.31	950.507	25.3		90 94 98 98 93 96 95 92	ELSSFLQK	CID
DLVDPTKC(+57.02)NLLAEKKYGFC(+57.02)K	20	94	600.576	4	21.88	2398.2	29.4	Carbamidomethylation	79 87 97 99 95 96 97 95 92 98 99 98 97 94 95 95 89 93 95 96	DLVDPTKC(+57.02)NLLAEKKYGFC(+57.02)K	CID
LC(+57.02)VLHEK	7	94	449.753	2	11.89	897.474	19.1	Carbamidomethylation	91 95 98 97 93 98 87	LC(+57.02)VLHEK	CID
SAFSVGLER	9	94	483.268	2	18.54	964.498	25.2		86 93 98 99 98 95 95 95 89	SAFSVGLER	CID
EFLDVLK	7	94	432.256	2	22.92	862.48	19.5		93 91 96 96 97 97 89	EFLDVLK	CID
GAC(+57.02)LLPK	7	94	379.716	2	14.91	757.416	2.4	Carbamidomethylation	82 88 94 98 99 99 99	GAC(+57.02)LLPK	CID
SYKENRELFLNR	12	94	523.627	3	14.84	1567.81	30.2		90 95 95 97 90 92 97 98 97 94 89 95	SYKENRELFLNR	CID
VLTEDLYQPR	10	94	617.355	2	18.2	1232.64	44		88 97 99 99 97 97 93 84 90 96	VLTEDLYQPR	CID
LETTWEKVLTSSAR	14	94	540.982	3	13.74	1619.85	44.6		95 98 97 88 88 95 93 98 99 98 94 91 91 90	LETTWEKVLTSSAR	CID
KC(+57.02)LLPKLETMR	11	93	694.903	2	22.58	1387.77	16.6	Carbamidomethylation	81 93 99 100 96 93 94 98 93 89 98	KC(+57.02)LLPKLETMR	CID
RGPVLC(+57.02)PGR	9	93	506.289	2	11.89	1010.54	19.2	Carbamidomethylation	90 84 90 96 98 96 96 93 99	RGPVLC(+57.02)PGR	CID
KDKATC(+57.02)VEK	9	93	539.794	2	2.54	1077.55	23.4	Carbamidomethylation	86 98 96 98 96 93 93 97 85	KDKATC(+57.02)VEK	CID
LPENVVVK	8	93	449.279	2	15.85	896.533	10.4		99 94 98 92 88 93 97 90	LPENVVVK	CID
TYDSYLGDDYVR	12	93	733.859	2	19.06	1465.64	46		75 78 99 99 99 100 98 99 99 90 93 96	TYDSYLGDDYVR	CID
SQKFPK	6	93	367.712	2	10.13	733.412	-4.2		85 90 94 97 99 97	SQKFPK	CID
ELPDPQESLQR	11	93	656.354	2	16.57	1310.65	35		91 90 91 98 96 93 98 94 96 91 92	ELPDPQESLQR	CID
FKFKFFKKFFKK	12	93	418.259	4	19.52	1668.99	10.1		88 89 88 91 95 95 93 98 96 96 96 98	FKFKFFKKFFKK	CID
GKVGTR	6	93	309.184	2	7.35	616.366	-18.6		82 92 98 96 98 96	GKVGTR	CID
LSSPATLNSR	10	93	523.296	2	13.28	1044.56	21		93 96 99 98 98 97 96 85 89 85	LSSPATLNSR	CID
C(+57.02)VLHEK	6	93	393.203	2	11.87	784.39	0.7	Carbamidomethylation	83 95 98 96 99 90	C(+57.02)VLHEK	CID
QPVTDAENC(+57.02)HLAR	13	93	504.262	3	9.66	1509.7	43.3	Carbamidomethylation	89 98 99 98 97 97 99 96 93 84 90 91 86	QPVTDAENC(+57.02)HLAR	CID
LC(+57.02)PKPEEHR	9	93	583.29	2	8.07	1164.57	-4.3	Carbamidomethylation	95 94 93 91 89 95 95 91 97	LC(+57.02)PKPEEHR	CID
VTMNMC(+57.02)R	7	93	456.204	2	11.62	910.382	12.4	Carbamidomethylation	93 97 92 93 88 96 94	VTMNMC(+57.02)R	CID
LLGNVLVVGVVLAR	14	93	474.658	3	32.65	1420.91	27.3		99 99 96 95 95 98 97 94 76 92 89 93 92 93	LLGNVLVVGVVLAR	CID
KFLSHLK	7	93	436.775	2	9.45	871.528	8.2		86 97 97 93 89 99 94	KFLSHLK	CID
EHVKLVNELTEFAK	14	93	828.994	2	23.19	1655.89	52		96 94 99 97 98 98 88 94 96 86 91 86 95 89	EHVKLVNELTEFAK	CID
EQPLKVSK	8	93	464.782	2	9.15	927.539	12.3		92 90 94 96 94 96 90 95	EQPLKVSK	CID
VLESSAR	7	93	381.211	2	7.94	760.408	0		96 97 98 94 90 93 85	VLESSAR	CID
KFAPNDLVSATK	12	93	645.866	2	15.77	1289.7	14.8		82 91 91 83 91 94 97 98 97 98 99 99	KFAPNDLVSATK	CID
LADEDMNSFKAAVK	14	93	769.915	2	18.11	1537.74	46.4		89 93 99 99 99 88 90 92 96 88 95 97 96 87	LADEDMNSFKAAVK	CID
SVQVMK	6	93	346.189	2	9.44	690.374	-13.9		89 91 94 98 94 93	SVQVMK	CID
LTSMEAC(+57.02)C(+57.02)ADGHR	13	93	754.325	2	10.61	1506.6	23.1	Carbamidomethylation	81 82 97 96 100 99 98 95 94 97 85 91 98	LTSMEAC(+57.02)C(+57.02)ADGHR	CID
LAERLR	6	93	379.236	2	8.94	756.461	-4.1		95 92 86 90 98 98	LAERLR	CID
KGAC(+57.02)LLPKLETMR	13	93	506.295	3	20.13	1515.83	23.6	Carbamidomethylation	90 84 90 96 98 99 98 98 99 98 90 77 95	KGAC(+57.02)LLPKLETMR	CID
HTLGGQLDSVKVWPR	15	93	564.994	3	20.49	1691.91	29.8		95 99 99 83 79 97 99 99 99 98 95 92 77 91 98	HTLGGQLDSVKVWPR	CID
SGVLQKALGGEDVR	14	93	476.94	3	18.2	1427.77	17.2		83 70 97 99 97 97 99 99 96 83 96 97 98 95	SGVLQKALGGEDVR	CID
ATC(+57.02)VEK	6	93	354.171	2	3.07	706.332	-5.8	Carbamidomethylation	92 95 95 95 98 85	ATC(+57.02)VEK	CID
NC(+57.02)EVR	5	93	339.154	2	2.77	676.296	-5.7	Carbamidomethylation	83 93 98 96 95	NC(+57.02)EVR	CID
ALFYLNK	7	93	434.755	2	19.48	867.485	11.5		88 95 97 92 94 94 94	ALFYLNK	CID
GHGAKVAAALTK	12	93	562.347	2	9.46	1122.65	26.4		88 92 92 96 97 97 82 84 96 97 99 97	GHGAKVAAALTK	CID
FLEKK	5	93	332.7	2	6.66	663.395	-14.9		92 95 97 95 86	FLEKK	CID
LPENVVVKDQHR	12	93	478.608	3	12.77	1432.78	15.4		99 97 98 92 95 97 97 96 91 82 81 92	LPENVVVKDQHR	CID
LLKHQPK	7	93	432.3	2	19.57	862.539	53		96 98 95 95 74 98 96	LLKHQPK	CID
EQVLTSSAR	9	93	495.793	2	7.42	989.514	57.7		90 85 98 100 99 99 92 87 88	EQVLTSSAR	CID
LSQKFPKSLFVEVTKLVTDLTK	22	93	631.138	4	32.2	2520.46	25.9		96 95 95 90 95 89 89 80 92 93 95 97 93 86 96 97 94 90 94 96 97 96	LSQKFPKSLFVEVTKLVTDLTK	CID
LSTNAYPDLR	10	93	575.314	2	16.81	1148.58	26.8		85 93 94 93 94 95 91 94 97 93	LSTNAYPDLR	CID
LNDYVEKGSHGKLVELVK	18	93	507.795	4	17.74	2027.11	22.1		98 97 99 98 98 98 93 83 86 86 86 90 95 91 95 95 96 90	LNDYVEKGSHGKLVELVK	CID
DVLLYEKR	8	93	518.31	2	14.47	1034.58	28.8		91 88 98 99 95 97 89 87	DVLLYEKR	CID
LAVTTSGSR	9	93	446.253	2	9.8	890.482	11.3		97 97 99 99 99 97 85 84 80	LAVTTSGSR	CID
APQLTSPELMALTR	14	93	764.449	2	26.52	1526.81	46.8		98 97 98 99 99 99 95 97 96 75 87 90 86 86	APQLTSPELMALTR	CID
ATEEKLKTVMENFVAFVDK	19	93	733.74	3	34.86	2198.13	31.7		88 90 98 98 91 97 94 84 89 99 100 99 99 97 94 93 95 97 79	ATEEKLKTVMENFVAFVDK	CID
LSKKFPK	7	93	424.261	2	14.72	846.533	-28.7		96 95 88 87 97 97 95	LSKKFPK	CID
KDDFASK	7	93	405.712	2	5.94	809.392	20.4		85 95 88 95 97 99 97	KDDFASK	CID
WFLGSFLYELHR	12	93	784.417	2	25.13	1566.8	12.8		81 98 100 99 99 99 100 99 98 83 71 95	WFLGSFLYELHR	CID
SYKENR	6	93	398.702	2	2.8	795.388	2.2		90 94 90 96 93 95	SYKENR	CID
VVSALR	6	93	322.703	2	10.08	643.402	-15.4		96 97 97 91 94 88	VVSALR	CID
SAEC(+57.02)PGPAQK	10	93	522.758	2	6.42	1043.47	29.3	Carbamidomethylation	88 92 99 99 99 98 96 94 78 95	SAEC(+57.02)PGPAQK	CID
ASEQLK	6	93	338.184	2	4.37	674.36	-9.1		94 96 96 86 97 92	ASEQLK	CID
SGELKTQAK	9	93	481.262	2	7.02	960.524	-14.7		90 81 99 99 96 95 90 95 95	SGELKTQAK	CID
VSQKFPK	7	93	417.252	2	8.52	832.481	11.5		92 95 90 88 93 98 97	VSQKFPK	CID
NTKSPLFVGK	10	93	545.835	2	14.94	1089.62	34.7		83 86 96 97 88 94 96 98 98 98	NTKSPLFVGK	CID
GEEHFK	6	93	373.677	2	13.77	745.34	-0.4		79 97 99 95 97 93	GEEHFK	CID
LQKFWR	6	93	439.256	2	13.42	876.497	-0.4		95 92 90 92 96 95	LQKFWR	CID
WKVWPR	6	93	436.269	2	19.53	870.486	42.3		83 96 95 93 96 97	WKVWPR	CID
VLTDSAR	7	93	381.213	2	7.95	760.408	4.1		94 97 98 98 90 91 83	VLTDSAR	CID
VTLSTKELR	9	93	523.83	2	13.49	1045.61	30.2		93 92 94 88 90 89 95 98 98	VTLSTKELR	CID
QLDSVKVWPR	10	93	614.372	2	18.55	1226.68	43.2		79 92 99 97 93 95 94 90 93 97	QLDSVKVWPR	CID
VLSAADKGNVKAAWGK	16	93	404.483	4	14.51	1613.89	8.6		97 98 98 97 93 95 95 86 89 92 93 96 95 86 89 89	VLSAADKGNVKAAWGK	CID
NHAVVSR	7	93	391.718	2	4.29	781.419	1.7		84 90 98 98 95 95 91	NHAVVSR	CID
SPLPQLPK	8	93	440.262	2	14.61	878.523	-14.8		92 91 98 89 86 97 96 95	SPLPQLPK	CID
HLVDEPKNLLKQNC(+57.02)DKFEK	19	93	785.767	3	20.12	2354.21	32	Carbamidomethylation	98 100 100 100 100 72 70 95 98 100 98 96 89 86 93 95 94 98 86	HLVDEPKNLLKQNC(+57.02)DKFEK	CID
C(+57.02)VLHEQTPVSEKVTK	15	92	439.496	4	14.95	1753.9	30.2	Carbamidomethylation	88 96 97 89 97 92 97 94 96 94 91 81 90 95 95	C(+57.02)VLHEQTPVSEKVTK	CID
SSGALHFVAR	10	92	522.81	2	18.89	1043.55	51.8		95 95 88 97 99 98 97 85 85 88	SSGALHFVAR	CID
YEYELAR	7	92	472.253	2	17.59	942.445	50.6		85 96 96 98 95 95 85	YEYELAR	CID
TSDANLNWNNLKDKK	15	92	587.653	3	15.14	1759.89	28.9		95 97 99 98 97 99 94 90 89 85 84 87 93 94 90	TSDANLNWNNLKDKK	CID
FYDLR	5	92	357.169	2	8.45	712.354	-42.2		86 92 96 96 93	FYDLR	CID
LYELARR	7	92	460.776	2	15.71	919.524	14.7		95 96 99 94 85 92 89	LYELARR	CID
EKPLKVSK	8	92	464.783	2	9.1	927.575	-26.1		90 86 94 97 94 95 89 95	EKPLKVSK	CID
LSLTKDNSK	9	92	503.291	2	8.67	1004.55	18		93 96 97 95 91 95 88 89 91	LSLTKDNSK	CID
KDTDFKLNELR	11	92	460.256	3	16.85	1377.73	15.9		82 94 85 92 95 97 98 95 96 94 92	KDTDFKLNELR	CID
EVVDPTK	7	92	394.215	2	8.61	786.412	4.3		90 88 96 98 95 97 84	EVVDPTK	CID
DGMLHGQK	8	92	443.221	2	7.36	884.417	10.5		93 88 83 96 94 94 94 97	DGMLHGQK	CID
SVKVWPR	7	92	436.266	2	19.72	870.508	12		85 89 91 92 93 98 99	SVKVWPR	CID
KYGFC(+57.02)KGSVLQK	12	92	472.25	3	14.96	1413.74	-11.6	Carbamidomethylation	79 91 93 96 96 95 89 93 91 96 95 95	KYGFC(+57.02)KGSVLQK	CID
SKDLLFRDDTK	11	92	446.579	3	14.41	1336.7	12.5		81 86 97 98 99 94 86 85 94 98 98	SKDLLFRDDTK	CID
SQDLLFADTVTKC(+57.02)LALSAK	19	92	694.402	3	21.72	2080.09	46.9	Carbamidomethylation	89 92 99 99 99 90 86 92 90 92 97 97 88 91 88 89 87 97 97	SQDLLFADTVTKC(+57.02)LALSAK	CID
NTHTELLK	8	92	478.271	2	9.9	954.513	13.8		81 90 95 88 93 97 99 98	NTHTELLK	CID
LPENVVVKDQR	11	92	648.892	2	14.12	1295.72	38.6		98 96 99 95 97 95 93 85 86 83 90	LPENVVVKDQR	CID
LSNNQLASLPR	11	92	606.859	2	18.15	1211.66	33.5		92 95 88 87 94 98 94 92 92 92 92	LSNNQLASLPR	CID
C(+57.02)LAWSSEQAK	10	92	590.296	2	14.51	1178.54	31.9	Carbamidomethylation	89 97 98 95 97 97 96 80 86 88	C(+57.02)LAWSSEQAK	CID
QEVLTSSAR	9	92	495.786	2	6.23	989.514	43.3		83 96 98 99 95 92 91 87 89	QEVLTSSAR	CID
KLEC(+57.02)C(+57.02)HKPLLEK	12	92	777.922	2	12.5	1553.81	15.3	Carbamidomethylation	87 97 99 98 90 68 90 92 95 98 98 95	KLEC(+57.02)C(+57.02)HKPLLEK	CID
SVQLMEKR	8	92	495.782	2	11.37	989.533	17.6		85 87 93 97 93 99 92 92	SVQLMEKR	CID
FSALKYLR	8	92	499.288	2	23.86	996.576	-15.1		95 97 99 99 90 72 89 98	FSALKYLR	CID
DLLFRDDTK	9	92	561.809	2	17.52	1121.57	27.8		89 90 97 90 91 89 93 97 94	DLLFRDDTK	CID
VSLLAALDEASK	12	92	608.866	2	26.86	1215.67	38.9		81 94 98 99 99 97 96 96 95 87 86 76	VSLLAALDEASK	CID
QLLSER	6	92	373.212	2	10.14	744.413	-3.5		81 95 96 93 97 92	QLLSER	CID
EGSKGSHVYTK	11	92	596.801	2	5.8	1191.59	-1.5		95 86 94 90 80 86 89 98 98 99 98	EGSKGSHVYTK	CID
RC(+57.02)APR	5	92	330.17	2	2.27	658.333	-11.7	Carbamidomethylation	88 90 95 94 93	RC(+57.02)APR	CID
SKFDPNLTQR	10	92	603.335	2	13.59	1204.62	28.6		89 92 98 99 89 85 95 93 90 90	SKFDPNLTQR	CID
ALHKAALTLDEK	12	92	655.402	2	13.19	1308.74	37.1		60 73 97 99 99 99 99 98 97 98 98 88	ALHKAALTLDEK	CID
VATVSLPR	8	92	421.762	2	16.65	841.502	9.1		95 99 98 94 95 94 77 85	VATVSLPR	CID
MDNPDTFYSLK	11	92	665.828	2	20.44	1329.59	38.1		68 97 97 97 98 95 96 97 90 95 82	MDNPDTFYSLK	CID
EDEDYLSLLLNR	12	92	740.396	2	34.46	1478.73	34.8		62 74 95 99 99 99 99 99 98 96 92 92	EDEDYLSLLLNR	CID
LSQKFPKAEFVEVTKLVTDLTK	22	92	631.135	4	32	2520.42	36.2		94 68 68 75 89 82 97 98 99 99 98 99 98 95 96 98 95 94 94 96 97 94	LSQKFPKAEFVEVTKLVTDLTK	CID
RDKDGYVLSLNR	12	92	718.415	2	16.83	1434.76	40.7		81 95 95 99 87 89 96 97 92 90 88 93	RDKDGYVLSLNR	CID
FYLNKEKR	8	92	549.323	2	14.72	1096.6	25.4		89 91 97 90 90 95 92 91	FYLNKEKR	CID
LKAWSVAR	8	92	465.787	2	15.26	929.545	15.3		96 92 98 95 82 82 95 95	LKAWSVAR	CID
FFKKFFKKRRKRTFKK	16	92	740.817	3	23.29	2219.37	26.8		95 96 98 98 98 97 96 96 93 90 80 86 66 91 96 98	FFKKFFKKRRKRTFKK	CID
DPALVELLK	9	92	499.312	2	28.54	996.586	24		77 59 95 99 99 99 99 100 99	DPALVELLK	CID
SSSPFASK	8	92	405.712	2	5.34	809.392	21.2		86 84 92 86 96 96 97 97	SSSPFASK	CID
ALQAAFFYLEPR	12	92	713.414	2	10.78	1424.75	48.1		50 62 96 100 100 100 99 99 99 100 100 99	ALQAAFFYLEPR	CID
KFKFFKKFKFK	11	92	381.49	4	19.24	1521.92	5.1		91 96 96 97 95 93 94 94 85 86 92	KFKFFKKFKFK	CID
VPSEKVTK	8	92	444.271	2	14.71	886.512	17.5		89 89 95 96 91 94 95 93	VPSEKVTK	CID
AAAQEQYSAAVAR	13	92	668.371	2	12	1334.66	52.7		74 78 98 97 99 97 97 94 94 96 96 96 89	AAAQEQYSAAVAR	CID
LSSFSQK	7	92	398.716	2	8.8	795.413	6.5		94 96 96 93 89 90 90	LSSFSQK	CID
LGKHSR	6	92	349.206	2	1.9	696.403	-9.1		95 90 90 91 95 95	LGKHSR	CID
LFHESVYGKC(+57.02)K	11	92	456.561	3	13.48	1366.67	-6.1	Carbamidomethylation	94 92 86 99 97 96 99 96 85 89 85	LFHESVYGKC(+57.02)K	CID
LKLSYEGELTK	11	92	640.888	2	18.41	1279.7	45.8		89 94 99 96 95 95 71 92 96 97 92	LKLSYEGELTK	CID
SVKVSVPR	8	92	436.268	2	14.11	870.529	-7.9		88 90 96 97 94 95 90 91	SVKVSVPR	CID
SKKFPK	6	92	367.714	2	10.04	733.449	-48.7		85 86 92 96 98 97	SKKFPK	CID
QMEKTKDALLK	11	92	652.898	2	11.55	1303.72	49.2		86 89 97 90 89 90 95 94 92 99 96	QMEKTKDALLK	CID
QTTVQAHYVLK	11	92	644.386	2	14.39	1286.7	46.8		77 89 98 98 93 94 86 97 94 99 93	QTTVQAHYVLK	CID
TSDANLNWNNLKGK	14	92	787.949	2	16.94	1573.78	62.5		76 87 97 95 95 98 95 90 92 88 95 93 94 97	TSDANLNWNNLKGK	CID
C(+57.02)HTGLGR	7	92	400.696	2	5.58	799.376	2.8	Carbamidomethylation	92 92 97 92 92 86 94	C(+57.02)HTGLGR	CID
EGC(+57.02)ALGHQER	10	92	578.792	2	11.34	1155.51	52.7	Carbamidomethylation	95 79 96 99 99 93 93 83 96 91	EGC(+57.02)ALGHQER	CID
RPGVLC(+57.02)PGR	9	92	506.294	2	11.74	1010.54	29	Carbamidomethylation	83 90 78 94 98 97 96 96 99	RPGVLC(+57.02)PGR	CID
AYFEKTKEELTPFFKK	16	92	669.383	3	23.73	2005.06	35.3		90 94 97 97 89 93 96 98 99 99 97 78 78 86 92 94	AYFEKTKEELTPFFKK	CID
QEPLKVSK	8	92	464.787	2	9.11	927.539	22.8		81 97 94 97 94 95 87 93	QEPLKVSK	CID
ASC(+57.02)KLSLKR	9	92	531.824	2	9.17	1061.6	30.4	Carbamidomethylation	82 90 95 95 98 94 95 90 87	ASC(+57.02)KLSLKR	CID
QVAHGKK	7	92	384.248	2	1.31	766.445	47.3		82 95 97 93 88 95 93	QVAHGKK	CID
VSLLAALDEASKKLNAK	17	92	591.028	3	30.42	1770.03	21.5		94 98 100 100 99 99 99 98 98 94 91 90 85 75 73 88 82	VSLLAALDEASKKLNAK	CID
LFRPESQADLALLK	14	92	534.325	3	24.12	1599.9	35		96 95 94 56 85 92 96 98 98 92 93 99 99 94	LFRPESQADLALLK	CID
WSVAR	5	92	309.665	2	11.92	617.329	-20.9		86 95 96 95 86	WSVAR	CID
LKHLVDEPQNLLK	13	91	773.987	2	18.71	1545.89	45.9		92 92 96 99 99 99 99 83 82 88 75 91 95	LKHLVDEPQNLLK	CID
RSLQKALGGEDVR	13	91	714.924	2	18.25	1427.78	34.3		86 85 96 95 96 98 98 88 79 83 92 98 97	RSLQKALGGEDVR	CID
LQKFGER	7	91	439.251	2	13.51	876.482	6.6		94 90 87 92 89 97 93	LQKFGER	CID
EAFVEVTKLVTDLTKVHK	18	91	686.42	3	30.17	2056.16	40.2		67 52 97 98 99 98 97 98 99 99 96 95 94 92 92 92 90 96	EAFVEVTKLVTDLTKVHK	CID
TVHTLFGDELC(+57.02)K	12	91	473.911	3	22.31	1418.69	18.6	Carbamidomethylation	69 79 83 93 98 99 99 99 98 97 95 89	TVHTLFGDELC(+57.02)K	CID
WVAVPLPLHR	10	91	594.385	2	24.06	1186.7	49.1		76 97 98 99 97 98 89 75 89 97	WVAVPLPLHR	CID
HTKLAVLPLLR	11	91	630.933	2	23.61	1259.81	35.4		88 98 98 99 99 98 78 59 97 98 97	HTKLAVLPLLR	CID
AC(+57.02)SLPYASESKEC(+57.02)R	14	91	553.263	3	13.19	1656.72	25.4	Carbamidomethylation	90 95 98 99 95 95 94 92 97 84 77 90 87 87	AC(+57.02)SLPYASESKEC(+57.02)R	CID
SLHTLFGDELC(+57.02)K	12	91	710.382	2	22.43	1418.69	44	Carbamidomethylation	49 66 98 99 100 99 96 99 99 98 98 97	SLHTLFGDELC(+57.02)K	CID
AEDKGAC(+57.02)LLPK	11	91	601.335	2	14.33	1200.62	32.3	Carbamidomethylation	71 93 96 93 87 91 88 93 96 99 99	AEDKGAC(+57.02)LLPK	CID
EVPVNPMC(+57.02)LYR	11	91	689.366	2	25.68	1376.66	42.6	Carbamidomethylation	89 84 94 98 98 92 82 90 90 91 97	EVPVNPMC(+57.02)LYR	CID
ELLKHKPK	8	91	496.826	2	19.53	991.618	20		93 95 99 97 95 98 96 59	ELLKHKPK	CID
QKFGER	6	91	382.707	2	13.46	763.398	1.2		81 95 92 87 98 96	QKFGER	CID
YLC(+57.02)DKNHTLSSK	12	91	733.346	2	11.69	1464.7	-17.7	Carbamidomethylation	96 97 95 96 82 74 70 94 96 97 99 99	YLC(+57.02)DKNHTLSSK	CID
GPNHAVVKRSDK	12	91	436.582	3	3.13	1306.71	9.8		89 90 91 95 99 98 96 87 81 81 97 92	GPNHAVVKRSDK	CID
DKATC(+57.02)VEKLLNKQKDDFGK	19	91	560.052	4	18.09	2236.15	11.3	Carbamidomethylation	95 94 97 96 95 96 98 93 95 92 87 88 83 82 90 91 91 86 84	DKATC(+57.02)VEKLLNKQKDDFGK	CID
WEFC(+57.02)DLPR	8	91	561.772	2	23.11	1121.5	30	Carbamidomethylation	72 96 96 92 94 94 93 94	WEFC(+57.02)DLPR	CID
LATVLSPR	8	91	428.77	2	16.99	855.518	9.8		95 95 97 94 85 85 84 95	LATVLSPR	CID
LC(+57.02)SQYAAYGKEK	12	91	709.372	2	11.23	1416.67	42.1	Carbamidomethylation	89 95 97 96 94 93 95 95 84 90 90 75	LC(+57.02)SQYAAYGKEK	CID
ETQSLLFLGK	10	91	568.338	2	23.51	1134.63	29.8		91 89 89 91 93 96 94 94 85 90	ETQSLLFLGK	CID
VVVLPFPSKEQR	12	91	466.95	3	22.46	1397.8	17.2		92 95 98 97 90 96 92 91 80 88 81 92	VVVLPFPSKEQR	CID
C(+57.02)HTAVDR	7	91	429.7	2	3.22	857.381	5.8	Carbamidomethylation	92 90 93 90 87 94 92	C(+57.02)HTAVDR	CID
KTSHMDC(+57.02)LK	9	91	560.282	2	6.54	1118.52	24.9	Carbamidomethylation	82 95 95 89 88 98 93 95 85	KTSHMDC(+57.02)LK	CID
TGEERHDC(+57.02)FLAHK	13	91	533.928	3	9.9	1598.73	22.6	Carbamidomethylation	96 92 98 90 91 84 97 98 97 77 71 96 97	TGEERHDC(+57.02)FLAHK	CID
AGAGSELQTQAK	12	91	580.834	2	6.48	1159.58	59.8		75 82 96 91 95 97 98 95 90 86 96 90	AGAGSELQTQAK	CID
KDGYVLSLNR	10	91	582.84	2	17.19	1163.63	30.6		85 99 93 97 99 99 92 88 75 84	KDGYVLSLNR	CID
HSKKQTALVELLK	13	91	747.999	2	24.78	1493.89	61.1		66 74 70 94 96 97 96 98 97 98 98 100 99	HSKKQTALVELLK	CID
LSLKR	5	91	308.705	2	8.24	615.407	-17.2		96 95 96 90 77	LSLKR	CID
C(+57.02)LMEGAGDVAFVK	13	91	698.863	2	22.92	1395.65	42.3	Carbamidomethylation	81 96 92 99 95 97 83 94 97 96 80 82 90	C(+57.02)LMEGAGDVAFVK	CID
VDEDYLSLLLNR	12	91	725.39	2	34.91	1448.75	10.4		76 88 93 96 96 98 95 97 97 94 86 85	VDEDYLSLLLNR	CID
EGSQGSHVYTK	11	91	596.802	2	9.64	1191.55	31.2		93 83 90 86 86 93 90 98 97 98 94	EGSQGSHVYTK	CID
SPKAAFFYLEPR	12	91	713.414	2	10.87	1424.75	48.1		65 66 83 99 99 99 99 98 98 98 98 98	SPKAAFFYLEPR	CID
ASEKLK	6	91	338.184	2	6.77	674.396	-62.4		96 96 96 77 96 88	ASEKLK	CID
KNLAGR	6	91	329.699	2	3.35	657.392	-13.9		84 94 92 92 90 97	KNLAGR	CID
LSKKFPKAEFVEVTKLVTDLTK	22	91	631.138	4	10.62	2520.46	25.6		88 85 69 79 90 81 73 95 99 98 97 99 98 95 97 98 93 89 95 96 97 96	LSKKFPKAEFVEVTKLVTDLTK	CID
HTLNQLDSVKVDAPR	15	91	564.996	3	20.61	1691.9	41.4		88 97 97 93 92 97 97 95 95 94 88 78 78 85 94	HTLNQLDSVKVDAPR	CID
LGEYGFQNALLVR	13	91	740.436	2	26.76	1478.79	46.2		86 84 98 96 93 95 90 86 92 94 89 93 88	LGEYGFQNALLVR	CID
C(+57.02)ADLQK	6	91	367.678	2	9.67	733.343	-3.3	Carbamidomethylation	94 95 95 89 85 88	C(+57.02)ADLQK	CID
RRRFR	5	91	395.746	2	9.77	789.483	-7.9		95 96 90 80 92	RRRFR	CID
TSDANLNWNNLKGKK	15	91	568.322	3	14.9	1701.88	37.7		94 98 99 98 95 97 92 86 87 88 90 90 76 91 96	TSDANLNWNNLKGKK	CID
AALSAADKGNVK	12	91	572.843	2	16.17	1143.62	41.5		79 80 99 99 99 99 98 96 82 92 93 84	AALSAADKGNVK	CID
C(+57.02)ASFRENVLR	10	91	417.886	3	14.91	1250.62	13.3	Carbamidomethylation	95 96 98 92 89 94 85 84 94 90	C(+57.02)ASFRENVLR	CID
RLQGHAVKETDDTSHKEAAC(+57.02)HK	22	91	840.107	3	11.16	2517.21	34	Carbamidomethylation	70 90 96 97 99 99 98 59 67 88 95 99 95 93 92 97 99 98 99 98 98 96	RLQGHAVKETDDTSHKEAAC(+57.02)HK	CID
ALWTGALTPGR	11	91	571.843	2	22.93	1141.62	42.1		84 93 94 98 96 97 98 98 86 74 92	ALWTGALTPGR	CID
SGNKFVLYR	9	91	542.301	2	18.8	1082.59	0.5		81 76 94 88 93 96 99 98 99	SGNKFVLYR	CID
LVDELTEFAK	10	91	582.834	2	21.24	1163.61	39.9		84 94 97 97 95 96 95 79 92 86	LVDELTEFAK	CID
LLYDRNTK	8	91	511.801	2	9.45	1021.56	31.8		98 99 98 96 88 86 86 82	LLYDRNTK	CID
LC(+57.02)SKYAAYGKEK	12	91	473.243	3	11.14	1416.71	-0.3	Carbamidomethylation	97 96 93 92 98 99 99 94 76 82 90 84	LC(+57.02)SKYAAYGKEK	CID
TGEPVEPDC(+57.02)FLAHK	14	91	533.934	3	9.81	1598.74	24.8	Carbamidomethylation	92 92 97 80 80 90 75 93 96 94 98 97 98 98	TGEPVEPDC(+57.02)FLAHK	CID
SLQKFWR	7	91	482.776	2	11.8	963.529	8.2		88 92 92 93 90 92 93	SLQKFWR	CID
QKC(+57.02)LLPKLETMR	12	91	506.297	3	19.95	1515.83	28.7	Carbamidomethylation	86 91 94 97 99 97 97 95 95 88 72 88	QKC(+57.02)LLPKLETMR	CID
SVAGLMEKR	9	91	495.789	2	11.33	989.533	31.5		89 84 93 85 97 93 99 91 91	SVAGLMEKR	CID
EYKTLEDK	8	91	513.259	2	9.36	1024.51	-3.7		95 90 89 93 95 96 92 80	EYKTLEDK	CID
YLC(+57.02)DNKDTLSSK	12	91	722.366	2	11.06	1442.67	32.1	Carbamidomethylation	86 95 98 97 88 79 90 90 95 92 94 93	YLC(+57.02)DNKDTLSSK	CID
DSWVDLFR	8	91	519.274	2	28.41	1036.5	33.9		76 83 90 97 99 98 93 95	DSWVDLFR	CID
ETTC(+57.02)SKGSNEELTK	14	91	792.413	2	7.08	1582.71	61.4	Carbamidomethylation	92 92 97 98 95 92 77 82 80 91 96 95 97 95	ETTC(+57.02)SKGSNEELTK	CID
WQVMKTEGSTTTHVK	15	91	578.325	3	11.45	1731.86	53.5		85 98 98 84 93 95 98 87 94 94 91 91 89 93 78	WQVMKTEGSTTTHVK	CID
LSNNKLASLPR	11	91	606.862	2	18.12	1211.7	9.9		86 89 91 92 92 94 92 89 92 93 93	LSNNKLASLPR	CID
SALTPDETYVPK	12	91	660.872	2	17.82	1319.66	51.4		77 85 97 99 94 95 94 89 82 91 96 95	SALTPDETYVPK	CID
FLSHLK	6	91	372.724	2	10.73	743.433	-0.4		92 96 92 82 95 89	FLSHLK	CID
TC(+57.02)VADESHAGC(+57.02)TR	13	91	732.339	2	7.14	1462.59	48.1	Carbamidomethylation	87 90 99 99 99 99 97 95 98 91 92 73 66	TC(+57.02)VADESHAGC(+57.02)TR	CID
DPWDKKR	7	91	472.762	2	18.1	943.487	23.2		95 77 91 96 93 94 90	DPWDKKR	CID
LVELLKHKPK	10	91	402.269	3	17.34	1203.77	12.6		97 97 99 99 97 95 92 94 93 48	LVELLKHKPK	CID
FYLNKEK	7	91	471.269	2	16.62	940.502	23.1		88 95 98 92 94 96 73	FYLNKEK	CID
GKFPDATETDLKELVAKR	18	91	673.392	3	23.74	2017.08	35.1		38 63 99 98 98 96 96 99 98 99 99 98 97 96 93 90 87 91	GKFPDATETDLKELVAKR	CID
ATVLYEGERVALQNK	15	90	846.004	2	18.01	1689.9	52.5		86 92 97 99 99 98 77 90 89 94 93 96 79 85 87	ATVLYEGERVALQNK	CID
AFTNLR	6	90	361.184	2	6.16	720.392	-52.6		92 92 92 85 92 93	AFTNLR	CID
YNSESPSK	8	90	456.214	2	4.14	910.403	11.6		89 92 93 94 94 89 90 84	YNSESPSK	CID
MATEHR	6	90	372.674	2	2.32	743.338	-5.9		79 95 97 96 91 87	MATEHR	CID
WRNSLQPR	8	90	528.8	2	11.78	1055.56	21.5		76 94 89 86 94 94 96 96	WRNSLQPR	CID
SYLQLWAFDAVKGK	14	90	813.48	2	29.07	1624.86	52.1		54 59 97 97 99 98 98 97 97 94 96 95 92 96	SYLQLWAFDAVKGK	CID
ALKAFASVAR	10	90	517.305	2	15.24	1032.61	-12.8		92 96 95 98 79 82 92 90 92 90	ALKAFASVAR	CID
QQASLAKK	8	90	437.252	2	18.33	872.508	-21.8		76 67 95 98 99 98 94 97	QQASLAKK	CID
EELTPFFK	8	90	505.774	2	23.96	1009.51	20.7		90 95 94 94 89 90 91 82	EELTPFFK	CID
LHLKPGR	7	90	410.763	2	8.65	819.508	5.2		94 90 98 92 83 84 92	LHLKPGR	CID
ALWTGALTGPR	11	90	571.836	2	22.97	1141.62	29.7		83 92 94 97 95 97 98 96 68 82 91	ALWTGALTGPR	CID
KYASLASNHLPK	12	90	664.896	2	14.63	1327.72	39.4		88 98 97 96 95 85 59 81 92 99 99 99	KYASLASNHLPK	CID
AYFEQTKEELTPFFKK	16	90	669.374	3	23.76	2005.02	39.8		87 92 98 99 89 86 83 97 98 98 92 86 86 85 84 86	AYFEQTKEELTPFFKK	CID
QYYFDGLSR	9	90	574.791	2	19.45	1147.53	32.5		86 91 97 99 99 82 91 86 82	QYYFDGLSR	CID
TVLSELSDPVELR	13	90	729.429	2	30.01	1456.78	45.3		46 71 98 99 99 99 98 99 90 87 94 97 97	TVLSELSDPVELR	CID
GHAWAR	6	90	349.177	2	6.26	696.346	-9.8		89 94 97 85 89 89	GHAWAR	CID
HSRPVEDVC(+57.02)TAKPR	14	90	413.717	4	10.67	1650.83	8	Carbamidomethylation	67 71 79 85 95 99 98 98 98 94 95 95 95 95	HSRPVEDVC(+57.02)TAKPR	CID
AMTNLR	6	90	353.185	2	9.3	704.364	-10.7		92 87 97 91 79 95	AMTNLR	CID
LEALKEGGGSLAEYHAK	17	90	591.661	3	16.07	1771.91	28.6		77 93 98 99 96 97 81 75 74 95 96 97 98 92 86 93 89	LEALKEGGGSLAEYHAK	CID
LKEVLHADSGPC(+57.02)LPHLLSR	19	90	536.307	4	22.86	2141.14	26.9	Carbamidomethylation	94 91 98 95 94 92 94 95 92 79 72 77 90 90 90 96 94 91 93	LKEVLHADSGPC(+57.02)LPHLLSR	CID
WFLGSFLYESYR	12	90	784.415	2	34.05	1566.75	40.8		75 95 99 97 97 96 98 94 93 79 79 79	WFLGSFLYESYR	CID
NVETTR	6	90	360.188	2	3.12	718.361	2		82 86 98 95 94 86	NVETTR	CID
RTYER	5	90	362.69	2	2.42	723.366	-2.5		83 79 94 99 96	RTYER	CID
SLHTLFGDELC(+57.02)KVASLR	17	90	649.369	3	28.56	1945.01	38.4	Carbamidomethylation	46 62 97 99 95 92 97 99 99 99 99 96 95 93 85 89 91	SLHTLFGDELC(+57.02)KVASLR	CID
DQATC(+57.02)VEKLLNK	12	90	473.601	3	15.51	1417.72	41.2	Carbamidomethylation	91 91 93 94 98 97 99 85 77 92 86 79	DQATC(+57.02)VEKLLNK	CID
EESSPDSAEDVKR	13	90	724.833	2	10.16	1447.64	6.1		89 91 89 98 97 98 98 96 98 92 79 66 79	EESSPDSAEDVKR	CID
QPLVSK	6	90	336.222	2	9.09	670.401	41.5		83 82 88 97 98 92	QPLVSK	CID
MKNLSPR	7	90	423.24	2	8.15	844.459	7.2		61 90 95 97 97 97 94	MKNLSPR	CID
ASSANLHLPK	10	90	519.302	2	16.06	1036.57	22.9		84 90 92 93 81 88 83 98 96 95	ASSANLHLPK	CID
VSLGDVGLTEVFSDR	15	90	797.451	2	29.36	1592.8	52.3		49 54 97 97 99 99 97 99 99 99 98 92 86 93 94	VSLGDVGLTEVFSDR	CID
LFREPSQADLALLK	14	90	534.319	3	24.16	1599.9	22.9		97 94 73 73 52 95 96 98 99 97 97 97 99 93	LFREPSQADLALLK	CID
TLESQLTPQAVER	13	90	736.426	2	18.86	1470.77	46.8		76 96 99 97 96 99 99 86 78 77 82 94 92	TLESQLTPQAVER	CID
NALFC(+57.02)LDSAWK	11	90	662.847	2	27.72	1323.63	38.6	Carbamidomethylation	72 95 99 98 90 90 85 90 92 86 93	NALFC(+57.02)LDSAWK	CID
MLSAEEKAAVTSLFAK	16	90	565.987	3	25.01	1694.89	28.2		88 98 99 96 96 97 98 99 99 98 60 35 90 93 98 98	MLSAEEKAAVTSLFAK	CID
QQLAPYSDDLRQR	13	90	530.619	3	15.48	1588.8	24.7		79 90 99 99 98 98 89 93 97 91 79 76 85	QQLAPYSDDLRQR	CID
MDKAGQYSSDKLR	13	90	500.258	3	9.95	1497.72	17.8		75 96 96 96 82 91 96 95 91 88 85 92 86	MDKAGQYSSDKLR	CID
WKVMKTEGSTTTHVK	15	90	866.994	2	11.45	1731.9	43.8		82 85 92 93 97 97 98 79 88 90 86 90 91 93 88	WKVMKTEGSTTTHVK	CID
FFETATESLAK	11	90	622.319	2	14.52	1242.61	8.5		90 92 99 97 93 82 91 86 89 86 82	FFETATESLAK	CID
KFFKFFKKFFKK	12	90	557.354	3	19.65	1668.99	29.6		80 90 84 94 84 93 94 96 93 93 94 91	KFFKFFKKFFKK	CID
MQETEDYLSLLLNR	14	90	862.972	2	26.93	1723.85	48.7		61 68 77 97 100 100 99 99 99 93 95 96 92 91	MQETEDYLSLLLNR	CID
ATGWNLPMGLLYSK	14	90	775.946	2	26.62	1549.8	52.8		82 86 88 92 95 98 94 72 79 90 98 96 98 97	ATGWNLPMGLLYSK	CID
DTHKSDVYTK	10	90	597.327	2	9.59	1192.57	55.8		88 91 90 95 89 88 91 86 94 91	DTHKSDVYTK	CID
AVLSVLGSVAK	11	90	522.34	2	10.72	1042.64	25.9		51 61 98 99 99 99 97 98 97 98 95	AVLSVLGSVAK	CID
SAEC(+57.02)PGPAGAK	11	90	522.756	2	10.17	1043.47	26.9	Carbamidomethylation	91 95 100 100 99 98 92 92 34 94 98	SAEC(+57.02)PGPAGAK	CID
LHQPK	5	90	311.699	2	2.9	621.36	38.5		95 92 71 98 95	LHQPK	CID
GLLSVLGSVAK	11	90	522.34	2	10.77	1042.64	26.1		35 90 98 99 99 99 93 95 92 94 94	GLLSVLGSVAK	CID
YLYELAR	7	90	464.259	2	64.45	926.486	19.1		90 95 92 95 90 87 81	YLYELAR	CID
SQFDPNLTQR	10	90	603.342	2	13.58	1204.58	71.7		82 92 98 99 94 91 95 85 80 89	SQFDPNLTQR	CID
NSSFVYLEPLPR	12	90	711.417	2	26.28	1420.74	59.4		49 73 97 98 99 99 99 99 93 96 91 95	NSSFVYLEPLPR	CID
LDQKFPK	7	90	438.259	2	10.7	874.491	14.6		86 94 87 85 91 97 95	LDQKFPK	CID
QLNLK	5	90	308.189	2	10.38	614.375	-20.2		84 95 91 96 88	QLNLK	CID
GMTNLNDALLR	11	90	609.347	2	21.48	1216.62	45.5		72 52 97 97 99 92 96 96 97 99 98	GMTNLNDALLR	CID
VGLVAVDKRFVLNKK	15	90	562.705	3	24.42	1685.04	33.5		89 91 98 97 97 97 93 85 91 95 90 91 75 84 85	VGLVAVDKRFVLNKK	CID
DKATC(+57.02)VEKLLNK	12	90	473.606	3	15.42	1417.76	24.6	Carbamidomethylation	93 93 95 95 96 95 98 78 79 91 87 86	DKATC(+57.02)VEKLLNK	CID
SVSDLYVQK	9	90	519.793	2	14.47	1037.54	30.6		73 89 96 98 98 95 95 85 86	SVSDLYVQK	CID
TSHMDC(+57.02)LK	8	90	496.233	2	7.71	990.426	24.6	Carbamidomethylation	91 94 96 84 95 89 90 82	TSHMDC(+57.02)LK	CID
ESSLLNKHLC(+57.02)AVMGK	15	90	843.977	2	21.91	1685.86	48	Carbamidomethylation	62 49 87 90 99 98 98 97 99 98 98 98 90 96 95	ESSLLNKHLC(+57.02)AVMGK	CID
SPHKAALTLDEK	12	90	437.261	3	13.13	1308.7	43.4		72 75 91 98 98 89 97 98 97 93 96 78	SPHKAALTLDEK	CID
LFQLK	5	90	324.704	2	16.8	647.401	-12.2		92 88 85 97 89	LFQLK	CID
ANLHLPK	7	90	396.742	2	14.56	791.465	4.8		81 85 90 85 99 97 94	ANLHLPK	CID
DTHKDELAHR	10	90	611.327	2	4.4	1220.59	41.2		91 91 89 94 90 89 88 88 88 94	DTHKDELAHR	CID
FQVENSNR	8	90	497.257	2	9.45	992.467	32.8		89 96 98 98 89 89 78 83	FQVENSNR	CID
KAPKLTSPELMALTR	15	90	828.518	2	24.44	1654.94	47.3		82 93 86 61 83 98 99 95 97 98 86 95 96 90 88	KAPKLTSPELMALTR	CID
TSDANLNWNNLKDK	14	89	816.944	2	17.12	1631.79	51.2		87 94 98 98 97 99 96 87 86 78 90 90 93 65	TSDANLNWNNLKDK	CID
GKFPDATETDLQELVAKR	18	89	673.384	3	23.72	2017.05	41.4		34 60 98 96 95 91 94 99 97 98 99 95 97 95 94 90 89 93	GKFPDATETDLQELVAKR	CID
KVLTSSAR	8	89	431.265	2	7.41	860.508	8.8		85 96 97 93 90 91 85 80	KVLTSSAR	CID
TVMENFVAFVDK	12	89	700.38	2	29.16	1398.69	42.7		73 87 93 99 94 93 95 92 88 92 94 78	TVMENFVAFVDK	CID
YDLNAK	6	89	723.399	1	9.61	722.36	44.1		77 86 94 90 97 94	YDLNAK	CID
DTDFKLNELR	10	89	625.845	2	19.39	1249.63	35.8		88 86 97 97 90 94 89 87 82 86	DTDFKLNELR	CID
FTYERYSR	8	89	561.287	2	11.94	1120.53	25.6		93 95 96 95 92 77 79 90	FTYERYSR	CID
GSVLAGK	7	89	316.186	2	5.52	630.37	-19.3		81 92 96 97 90 85 85	GSVLAGK	CID
EVVDPTKC(+57.02)NLLAEKKYGFC(+57.02)K	20	89	800.436	3	21.97	2398.2	34.6	Carbamidomethylation	95 94 99 99 84 87 92 46 60 97 100 97 95 90 92 93 86 93 95 96	EVVDPTKC(+57.02)NLLAEKKYGFC(+57.02)K	CID
KVPQVSTPTLVEVDR	15	89	834.513	2	22.39	1666.93	52.1		81 92 96 93 98 98 98 90 90 93 84 90 78 84 78	KVPQVSTPTLVEVDR	CID
MLSAEEKAAVSTLFAK	16	89	565.987	3	25.06	1694.89	27.9		89 99 99 83 91 99 99 99 99 98 51 44 92 94 98 98	MLSAEEKAAVSTLFAK	CID
FWGKYLYELVK	11	89	482.6	3	26.06	1444.78	2.5		92 93 89 95 98 99 99 99 92 82 48	FWGKYLYELVK	CID
GYKHTLDQLDSVKVWPR	17	89	681.394	3	21.58	2041.07	42.2		32 54 93 98 98 98 98 97 99 99 98 95 93 96 86 89 98	GYKHTLDQLDSVKVWPR	CID
TPLVGQPSLPGGPVR	15	89	737.957	2	21.59	1473.83	46.9		96 98 100 100 99 98 97 97 99 98 89 88 37 52 95	TPLVGQPSLPGGPVR	CID
RYELAR	6	89	404.229	2	15.65	806.44	4.4		85 81 88 93 95 94	RYELAR	CID
SVKLMEK	7	89	417.725	2	12.96	833.468	-39		89 90 86 90 83 98 89	SVKLMEK	CID
QNC(+57.02)DQFEK	8	89	534.736	2	7.63	1067.43	22.2	Carbamidomethylation	75 92 96 97 90 91 95 80	QNC(+57.02)DQFEK	CID
KFWGK	5	89	333.188	2	10.53	664.37	-12.9		86 94 85 92 90	KFWGK	CID
SSALKVPMMNSK	12	89	646.861	2	18.6	1291.66	35.1		55 59 89 98 99 99 97 93 94 97 98 98	SSALKVPMMNSK	CID
DLVDVVKC(+57.02)NLLAEKKYGFC(+57.02)K	20	89	800.437	3	21.89	2398.24	21	Carbamidomethylation	87 88 97 99 92 89 91 46 61 97 99 99 97 89 91 94 86 94 95 97	DLVDVVKC(+57.02)NLLAEKKYGFC(+57.02)K	CID
LLSRLR	6	89	379.235	2	8.89	756.497	-53.8		94 89 75 87 96 95	LLSRLR	CID
VESSSGEAFHVGK	13	89	667.346	2	12.63	1332.63	35.2		79 97 98 97 93 80 94 92 91 81 95 86 78	VESSSGEAFHVGK	CID
LSDANLR	7	89	394.718	2	9.98	787.419	2.3		95 96 98 86 75 90 85	LSDANLR	CID
YNSESRR	7	89	456.214	2	4.08	910.426	-14.5		92 92 92 94 82 85 89	YNSESRR	CID
QESPDVLLAQLR	12	89	684.905	2	24.81	1367.74	40.4		34 76 97 95 98 97 99 99 97 88 94 94	QESPDVLLAQLR	CID
KVPQVDTPTLVEVSR	15	89	834.514	2	21.99	1666.93	53.3		67 91 90 93 96 98 96 89 90 96 93 96 80 83 81	KVPQVDTPTLVEVSR	CID
LDSVKVWPR	9	89	550.331	2	20.49	1098.62	26.3		94 96 97 92 84 90 71 82 96	LDSVKVWPR	CID
ALTVTKVSQKFPK	13	89	723.97	2	16.18	1445.86	44.1		54 68 96 97 99 98 95 90 85 86 95 99 98	ALTVTKVSQKFPK	CID
GVPRLC(+57.02)PGR	9	89	506.289	2	11.84	1010.54	18.8	Carbamidomethylation	73 86 65 92 97 97 97 96 99	GVPRLC(+57.02)PGR	CID
EYQTLEDK	8	89	513.255	2	9.45	1024.47	22.6		89 86 89 90 94 95 92 79	EYQTLEDK	CID
LKPDPNTLC(+57.02)DEFKADEK	17	89	505.759	4	19.44	2018.96	22.7	Carbamidomethylation	91 89 78 91 96 96 99 99 97 84 83 89 86 83 89 95 70	LKPDPNTLC(+57.02)DEFKADEK	CID
KGFPDATETDLKELVAK	17	89	931.533	2	24.74	1860.98	36.4		50 57 97 76 85 97 98 99 94 96 99 96 98 95 93 96 88	KGFPDATETDLKELVAK	CID
KVPKVDTPTLVEVSR	15	89	834.513	2	22.04	1666.96	29.9		82 95 91 92 95 97 95 86 88 92 83 95 81 80 78	KVPKVDTPTLVEVSR	CID
LSKQFPKAEFVEVTKLVTDLTK	22	89	631.135	4	31.85	2520.42	35.3		93 63 61 54 78 78 96 97 98 97 96 99 98 94 94 97 93 87 95 96 97 94	LSKQFPKAEFVEVTKLVTDLTK	CID
RHPEYAWVLLR	11	89	720.443	2	21.28	1438.78	61		91 95 91 95 90 83 65 82 91 98 97	RHPEYAWVLLR	CID
DSLQPR	6	89	358.206	2	6.86	714.366	44.9		88 86 85 86 94 94	DSLQPR	CID
KVPQVSEPTLVEVSR	15	89	834.513	2	22.79	1666.93	51.5		79 93 95 93 96 98 98 86 88 90 81 90 82 82 80	KVPQVSEPTLVEVSR	CID
TSTKPFHLK	9	89	529.816	2	11.32	1057.59	23.1		85 92 90 86 76 79 95 99 97	TSTKPFHLK	CID
QFDLGEEHFK	10	89	625.336	2	14.9	1248.58	64.2		79 93 96 94 72 92 94 87 97 92	QFDLGEEHFK	CID
ETMREK	6	89	397.2	2	10.28	792.38	6		99 98 86 90 95 69	ETMREK	CID
LSAGKFPK	8	89	424.26	2	15.43	846.496	11.5		95 94 88 66 94 94 93 91	LSAGKFPK	CID
REEKKFWR	8	89	589.804	2	17.71	1177.64	-35.9		86 89 90 89 90 89 89 92	REEKKFWR	CID
VTFELVYEELLAR	13	89	791.471	2	33.5	1580.85	52.3		45 51 96 99 99 99 99 99 96 92 95 95 92	VTFELVYEELLAR	CID
C(+57.02)EAEVPDVSFLLLR	14	89	824.47	2	31.15	1646.83	55.1	Carbamidomethylation	57 97 98 99 99 97 96 94 91 80 60 80 99 96	C(+57.02)EAEVPDVSFLLLR	CID
YNKEAKWFLGSFLYELHR	18	89	767.747	3	29.99	2300.17	20.3		83 85 94 98 93 88 90 97 99 99 99 97 99 98 97 80 35 84	YNKEAKWFLGSFLYELHR	CID
KLEC(+57.02)C(+57.02)DKPLLEK	12	89	766.942	2	12.5	1531.77	63.1	Carbamidomethylation	63 69 90 88 97 98 97 95 96 94 96 92	KLEC(+57.02)C(+57.02)DKPLLEK	CID
EFC(+57.02)DNKDTLSSK	12	89	722.366	2	11.2	1442.63	56.9	Carbamidomethylation	84 86 92 97 92 81 90 87 90 90 95 90	EFC(+57.02)DNKDTLSSK	CID
FFPEYAVSVLLR	12	89	480.956	3	20.4	1439.78	45.1		77 44 82 96 96 98 99 96 94 98 99 98	FFPEYAVSVLLR	CID
LRMELSQADLALLK	14	89	534.323	3	24.07	1599.9	28.3		92 94 55 85 72 90 93 97 97 95 95 98 98 92	LRMELSQADLALLK	CID
VANYFDWLSQHVGR	14	89	564.635	3	28.62	1690.82	37.1		86 94 93 95 97 97 88 95 94 83 78 88 80 84	VANYFDWLSQHVGR	CID
LALYLNTGYQR	11	89	656.39	2	21.48	1310.7	51.7		67 65 99 99 100 98 98 91 86 87 94	LALYLNTGYQR	CID
C(+57.02)VLHEKTPVSEK	12	89	476.26	3	14.62	1425.73	21.6	Carbamidomethylation	86 95 96 93 98 95 98 95 86 81 88 60	C(+57.02)VLHEKTPVSEK	CID
LFTFHWLC(+57.02)TLPDTEKKLKK	19	89	602.096	4	24.32	2404.3	23.9	Carbamidomethylation	98 98 98 91 83 90 96 93 86 98 92 96 84 90 83 67 66 91 95	LFTFHWLC(+57.02)TLPDTEKKLKK	CID
STGTLLNNALK	11	89	566.343	2	18.6	1130.63	37.4		65 89 90 96 99 96 89 85 88 95 89	STGTLLNNALK	CID
KKTALLHLLK	10	89	582.876	2	21.98	1163.78	-32.9		91 97 92 83 91 86 72 91 96 90	KKTALLHLLK	CID
WVVGPSVVAVPLPLHR	16	89	576.043	3	29.56	1725.01	56.6		75 96 95 91 92 89 90 97 97 94 85 92 76 88 78 88	WVVGPSVVAVPLPLHR	CID
ATSLVK	6	89	309.69	2	7.6	617.375	-16.8		90 92 86 90 92 84	ATSLVK	CID
SVLGSVAK	8	89	380.733	2	13.46	759.449	3.2		85 90 97 92 80 90 91 85	SVLGSVAK	CID
LYRTLPDPQESLQR	14	89	572.659	3	18.41	1714.9	32.1		79 80 80 63 95 96 99 99 98 98 96 92 83 88	LYRTLPDPQESLQR	CID
QQLAPYSDDRLQR	13	89	530.624	3	15.48	1588.8	35.1		75 93 98 97 94 93 85 90 98 90 85 76 79	QQLAPYSDDRLQR	CID
TNSK	4	88	449.24	1	4.44	448.228	9		85 85 96 90	TNSK	CID
RTGQVGLAR	9	88	479.29	2	8.52	956.552	15.3		86 88 88 70 91 90 96 95 93	RTGQVGLAR	CID
RYTGGPR	7	88	403.717	2	3.82	805.419	1		88 85 86 78 90 97 96	RYTGGPR	CID
HLVDEPQNLLKKNC(+57.02)DQFEK	19	88	785.756	3	20.25	2354.17	33.1	Carbamidomethylation	97 100 100 100 100 66 60 68 84 99 99 98 79 59 94 95 97 99 94	HLVDEPQNLLKKNC(+57.02)DQFEK	CID
LC(+57.02)RPGLR	7	88	436.255	2	10.1	870.486	10.4	Carbamidomethylation	91 90 93 79 74 97 95	LC(+57.02)RPGLR	CID
WLNRYYC(+57.02)FR	9	88	459.896	3	20.22	1376.64	15.8	Carbamidomethylation	85 98 73 82 89 93 91 90 95	WLNRYYC(+57.02)FR	CID
TMLEYR	6	88	406.703	2	13.01	811.39	2.8		83 74 94 94 93 92	TMLEYR	CID
QQFLLNLVK	9	88	551.85	2	26.96	1101.65	28.8		76 90 98 99 98 74 80 95 88	QQFLLNLVK	CID
GPNHAVVSRK	10	88	532.813	2	4.53	1063.59	21.8		90 90 97 99 100 99 95 77 82 57	GPNHAVVSRK	CID
MLSAEEKAAVVTTFAK	16	88	565.986	3	25.11	1694.89	27.2		88 99 98 96 97 97 95 97 98 95 70 59 51 90 97 94	MLSAEEKAAVVTTFAK	CID
DVSLQKFGER	10	88	589.804	2	17	1177.61	-13.9		79 43 93 98 95 95 97 90 98 97	DVSLQKFGER	CID
EKVLTC(+57.02)LR	8	88	509.79	2	8.41	1017.56	0.6	Carbamidomethylation	90 85 98 99 90 78 77 93	EKVLTC(+57.02)LR	CID
TLKVQGR	7	88	401.252	2	7.2	800.487	2.6		90 94 89 89 88 79 92	TLKVQGR	CID
LSAPTAATKR	10	88	508.308	2	9.54	1014.58	18.3		84 71 96 93 96 96 97 90 85 77	LSAPTAATKR	CID
ELPC(+57.02)GK	6	88	352.174	2	7.55	702.337	-5.8	Carbamidomethylation	90 90 85 91 89 85	ELPC(+57.02)GK	CID
VASLRETYGDMADC(+57.02)C(+57.02)AK	17	88	649.643	3	16.35	1945.83	38.3	Carbamidomethylation	95 96 97 91 52 69 54 96 96 99 96 97 96 93 90 92 95	VASLRETYGDMADC(+57.02)C(+57.02)AK	CID
QPC(+57.02)DQFEK	8	88	526.222	2	10.46	1050.44	-14	Carbamidomethylation	77 80 96 97 94 94 95 73	QPC(+57.02)DQFEK	CID
AHYDLR	6	88	387.697	2	8.99	773.382	-2.8		85 79 88 95 95 89	AHYDLR	CID
ASEC(+57.02)PGPAQK	10	88	522.754	2	6.63	1043.47	21.6	Carbamidomethylation	71 86 98 98 92 88 86 83 91 88	ASEC(+57.02)PGPAQK	CID
TSDANLNWDNLK	12	88	695.863	2	17.86	1389.65	42.5		72 88 98 98 95 97 93 87 93 82 88 68	TSDANLNWDNLK	CID
FAGALVR	7	88	367.238	2	13.01	732.428	45		78 94 65 92 95 98 96	FAGALVR	CID
TLKKR	5	88	323.219	2	1.93	644.433	-15.3		91 95 89 90 77	TLKKR	CID
VSLLAALDEASKK	13	88	672.916	2	25.07	1343.77	38.9		82 87 96 99 98 97 96 95 97 90 90 85 34	VSLLAALDEASKK	CID
GPNHAGAVVSR	11	88	532.813	2	4.59	1063.55	55.3		74 90 96 97 99 67 90 89 88 90 90	GPNHAGAVVSR	CID
WLNEQR	6	88	423.219	2	11.18	844.419	5.2		78 96 93 94 86 82	WLNEQR	CID
NLKKYVQEVLC(+57.02)K	12	88	507.952	3	16.11	1520.84	-2.7	Carbamidomethylation	82 91 90 82 85 85 84 95 94 96 88 86	NLKKYVQEVLC(+57.02)K	CID
VVTRFFALVR	10	88	604.369	2	16.47	1206.72	-1		88 86 89 93 85 85 88 86 88 94	VVTRFFALVR	CID
LKLSYEWLTK	10	88	640.881	2	18.5	1279.72	23.4		92 91 99 97 92 92 82 74 82 80	LKLSYEWLTK	CID
QKTALLHLLK	10	88	582.871	2	22.06	1163.74	-9.3		86 96 93 92 92 90 55 93 97 89	QKTALLHLLK	CID
YLC(+57.02)DNQDTLDSK	12	88	736.357	2	12.84	1470.63	46.9	Carbamidomethylation	74 92 96 96 90 86 93 85 87 90 88 80	YLC(+57.02)DNQDTLDSK	CID
FVSDLRPQLDSVK	13	88	501.947	3	13.17	1502.81	6.5		87 88 86 90 88 93 85 93 93 92 89 90 72	FVSDLRPQLDSVK	CID
TKDLPQAQR	9	88	528.803	2	7.76	1055.57	18.6		86 82 98 99 88 85 86 85 84	TKDLPQAQR	CID
FWGKYLYELAR	11	88	482.601	3	26.1	1444.75	21.4		88 92 88 95 97 99 99 99 92 51 71	FWGKYLYELAR	CID
FQTVADYGKDLVEKAK	16	88	604.676	3	21.67	1810.95	32.1		83 87 96 93 88 91 90 71 77 92 88 89 93 88 93 88	FQTVADYGKDLVEKAK	CID
VVTGVANALAHYR	13	88	457.595	3	19.29	1369.75	13.1		81 87 87 76 89 95 92 95 97 90 83 87 86	VVTGVANALAHYR	CID
FNPFASK	7	88	405.711	2	4.37	809.407	-0.2		76 79 72 95 97 99 98	FNPFASK	CID
LKPDPNTLC(+57.02)DEFKADEKK	18	88	537.785	4	18.69	2147.06	24.9	Carbamidomethylation	76 80 79 92 89 91 98 99 96 97 97 75 76 81 84 92 92 88	LKPDPNTLC(+57.02)DEFKADEKK	CID
GSYLQLVELSR	11	88	632.872	2	25.61	1263.68	36.7		33 57 95 99 98 99 98 99 97 96 96	GSYLQLVELSR	CID
SHKKKTALVELLK	13	88	747.999	2	24.72	1493.93	35.9		40 33 90 96 96 98 97 98 98 99 99 100 99	SHKKKTALVELLK	CID
ASLTPDETYVPK	12	88	660.862	2	17.85	1319.66	37.4		70 80 95 98 93 95 93 84 78 85 93 89	ASLTPDETYVPK	CID
ALKAYAAVAR	10	88	517.305	2	15.18	1032.61	-11.6		88 93 94 97 83 77 83 84 91 88	ALKAYAAVAR	CID
FKDLWEHFK	9	88	625.336	2	17.17	1248.63	22.8		85 92 98 95 84 92 86 88 80	FKDLWEHFK	CID
VLGLSAR	7	88	358.207	2	10.27	714.439	-55.2		94 95 79 84 88 91 91	VLGLSAR	CID
EAFVEVTKLVTHLTK	15	88	858.015	2	31.62	1713.97	28.2		94 91 97 98 99 92 83 79 91 90 84 57 91 93 89	EAFVEVTKLVTHLTK	CID
ASFSVLGDLLGSAMR	15	88	762.438	2	34.46	1522.78	52.2		50 52 86 95 99 100 99 100 100 100 97 98 95 74 86	ASFSVLGDLLGSAMR	CID
GYKHTLNQLDSVKVWPR	17	88	681.068	3	10.43	2040.09	44.8		28 49 92 98 99 98 93 95 99 99 98 94 93 95 84 92 98	GYKHTLNQLDSVKVWPR	CID
LLGNVLVVVLRAR	13	88	711.503	2	29.6	1420.92	47.3		97 96 89 88 90 95 95 95 92 60 83 75 88	LLGNVLVVVLRAR	CID
QDATC(+57.02)VEK	8	88	475.745	2	3.84	949.418	60.3	Carbamidomethylation	76 96 95 91 90 91 95 75	QDATC(+57.02)VEK	CID
LKKNVK	6	88	365.231	2	2.54	728.491	-59.9		96 89 89 82 94 83	LKKNVK	CID
YLC(+57.02)DNQHTLSSK	12	88	733.358	2	11.6	1464.67	23.6	Carbamidomethylation	90 95 97 97 79 72 52 92 96 97 99 98	YLC(+57.02)DNQHTLSSK	CID
AHLAFKPTVAQQR	13	88	489.625	3	14.52	1465.82	25.7		94 92 98 97 95 97 97 95 94 85 70 63 75	AHLAFKPTVAQQR	CID
NLKQYVQEVLC(+57.02)K	12	88	507.958	3	16.06	1520.8	32.7	Carbamidomethylation	81 94 88 85 85 81 82 96 95 97 90 89	NLKQYVQEVLC(+57.02)K	CID
SYLKLWAFDAVKGK	14	88	813.492	2	28.98	1624.9	44.2		48 52 97 95 98 95 97 97 96 92 95 92 90 96	SYLKLWAFDAVKGK	CID
VALKNKFK	8	88	474.298	2	12.18	946.596	-14.9		93 96 98 90 78 82 85 88	VALKNKFK	CID
VELLKHKPK	9	88	546.369	2	19.45	1090.69	34.4		82 97 99 99 95 90 95 91 50	VELLKHKPK	CID
SFLYEYSR	8	88	532.774	2	18.65	1063.5	33.8		81 84 98 96 97 89 85 78	SFLYEYSR	CID
VGLNFSPGQSFPASKAHLR	19	88	671.717	3	24.48	2012.06	34.4		83 77 95 94 92 93 88 81 88 96 97 94 91 80 73 84 83 95 95	VGLNFSPGQSFPASKAHLR	CID
HSKKKTALVELLK	13	88	748.012	2	24.69	1493.93	53.6		31 44 93 98 98 98 97 98 98 99 98 99 97	HSKKKTALVELLK	CID
MLTSSAR	7	88	383.209	2	6.62	764.385	24.1		66 94 90 90 94 96 89	MLTSSAR	CID
EC(+57.02)ALGHQER	9	88	550.278	2	12.19	1098.49	49.7	Carbamidomethylation	72 55 95 99 97 96 94 95 91	EC(+57.02)ALGHQER	CID
LQHKDWTGGKEFK	13	88	787.439	2	13.25	1572.8	37.6		88 89 94 95 98 95 96 87 70 76 86 86 82	LQHKDWTGGKEFK	CID
AALR	4	88	430.272	1	13.57	429.27	-11.4		87 85 95 86	AALR	CID
RHPEYAVDVLLR	12	88	734.451	2	21.69	1466.8	59.9		66 69 90 95 94 92 91 94 82 92 98 95	RHPEYAVDVLLR	CID
TDLTK	5	88	577.385	1	13.98	576.312	114.4		77 86 94 96 87	TDLTK	CID
FLGDGVNFDQLSSR	14	88	518.943	3	19.25	1553.75	38		95 98 96 97 79 82 79 71 77 90 95 93 91 88	FLGDGVNFDQLSSR	CID
VVAVPLPLHR	10	88	550.871	2	23.18	1099.69	37.6		82 92 97 97 92 97 85 81 69 86	VVAVPLPLHR	CID
ETSYLC(+57.02)SKQDLLSR	14	88	850.47	2	22.06	1698.82	58.8	Carbamidomethylation	48 35 86 97 100 99 97 92 95 97 98 96 96 94	ETSYLC(+57.02)SKQDLLSR	CID
MTSLQKFWR	9	88	598.815	2	13.24	1195.62	-1.8		66 82 97 98 89 86 89 91 91	MTSLQKFWR	CID
KVLDSFC(+57.02)EGLK	11	88	648.368	2	18.7	1294.66	48.3	Carbamidomethylation	75 97 98 98 91 86 87 95 67 90 82	KVLDSFC(+57.02)EGLK	CID
YNSENKSGNKFVLYR	15	87	606.983	3	17.67	1817.91	12.1		93 90 94 93 85 90 92 74 85 79 62 91 94 95 97	YNSENKSGNKFVLYR	CID
EESSPDSAEDKVR	13	87	724.832	2	10.11	1447.64	4.7		57 61 91 98 96 98 99 99 99 94 83 79 87	EESSPDSAEDKVR	CID
TEGSTTTHVK	10	87	530.778	2	3.73	1059.52	21.1		89 99 94 92 91 91 90 75 86 71	TEGSTTTHVK	CID
GYKHTLNQLDSVK	13	87	501.613	3	13.23	1501.79	19.9		30 51 94 95 98 99 96 95 98 98 96 97 92	GYKHTLNQLDSVK	CID
WQLMEKR	7	87	495.783	2	11.42	989.512	40.8		72 95 97 82 95 90 83	WQLMEKR	CID
QKFPK	5	87	324.192	2	10.28	646.38	-17.3		78 90 85 96 90	QKFPK	CID
NLDLLEGAVTSASK	14	87	709.409	2	24.87	1416.75	40.9		37 69 97 98 99 99 85 92 97 96 89 89 91 89	NLDLLEGAVTSASK	CID
LFTFHWLC(+57.02)TLPDTEKQLKK	19	87	602.088	4	24.37	2404.26	25.1	Carbamidomethylation	98 98 99 96 92 94 97 94 93 98 92 96 84 90 79 37 55 83 88	LFTFHWLC(+57.02)TLPDTEKQLKK	CID
QYYFAEVTK	9	87	574.791	2	19.5	1147.55	11.7		80 89 92 90 88 94 90 90 74	QYYFAEVTK	CID
SFAC(+57.02)YSTVFDKLK	13	87	783.431	2	19.36	1564.76	56.3	Carbamidomethylation	85 89 97 96 95 93 50 51 93 97 96 98 96	SFAC(+57.02)YSTVFDKLK	CID
NLQKYVQEVLC(+57.02)K	12	87	507.953	3	16.06	1520.8	22.5	Carbamidomethylation	75 88 77 83 89 89 86 98 92 97 90 85	NLQKYVQEVLC(+57.02)K	CID
QNLKHKPK	8	87	496.827	2	17.51	991.593	46.3		79 92 97 92 90 97 95 57	QNLKHKPK	CID
KGWEKPFEMK	10	87	427.226	3	15.6	1278.64	11.4		73 79 88 95 90 83 86 95 90 93	KGWEKPFEMK	CID
LETFREK	7	87	461.742	2	3.03	921.492	-23.6		90 95 93 80 86 95 72	LETFREK	CID
TGDGKTYR	8	87	449.212	2	4.32	896.435	-27.7		96 94 98 87 80 84 78 82	TGDGKTYR	CID
NELTEFAK	8	87	476.251	2	16.5	950.471	17.4		75 94 97 91 96 90 88 68	NELTEFAK	CID
DLLRTVR	7	87	436.737	2	5.19	871.524	-74.6		92 90 89 85 79 91 85	DLLRTVR	CID
VASLWVTYGDMADC(+57.02)C(+57.02)EK	17	87	668.978	3	16.17	2003.84	35	Carbamidomethylation	96 97 97 87 29 27 89 96 97 99 97 98 97 96 92 96 93	VASLWVTYGDMADC(+57.02)C(+57.02)EK	CID
VMSYLC(+57.02)SQQDLLSR	14	87	850.456	2	22.05	1698.81	53.2	Carbamidomethylation	48 26 89 95 100 99 97 91 92 97 98 96 96 96	VMSYLC(+57.02)SQQDLLSR	CID
SLGK	4	87	404.253	1	2.58	403.243	7		81 85 93 90	SLGK	CID
LLGNVLVVVLARR	13	87	711.502	2	32.6	1420.92	45.9		94 95 79 76 81 90 96 95 91 82 77 85 89	LLGNVLVVVLARR	CID
LC(+57.02)VLHTR	7	87	449.751	2	12.04	897.486	2	Carbamidomethylation	90 90 94 90 83 71 92	LC(+57.02)VLHTR	CID
NLKAWSVAR	9	87	522.814	2	21.41	1043.59	24.9		71 92 91 95 93 94 86 82 79	NLKAWSVAR	CID
SLDEC(+57.02)C(+57.02)HSESSTAC(+57.02)LNAKGPKLTR	24	87	681.084	4	15.93	2720.23	27.1	Carbamidomethylation	46 62 98 99 93 91 86 91 96 97 96 90 92 93 91 88 90 92 82 74 81 85 88 86	SLDEC(+57.02)C(+57.02)HSESSTAC(+57.02)LNAKGPKLTR	CID
QKTALVELLKHKPK	14	87	817.052	2	17.62	1632.01	49.4		86 90 93 95 97 95 95 93 96 80 75 93 90 41	QKTALVELLKHKPK	CID
LEALKEGNSLAEYHAK	16	87	443.99	4	16.1	1771.91	11.3		93 96 97 97 85 81 44 73 80 98 95 97 92 86 93 86	LEALKEGNSLAEYHAK	CID
LVTDLAGTVHK	11	87	577.368	2	14.37	1152.65	61.8		89 96 98 99 98 56 61 79 93 93 94	LVTDLAGTVHK	CID
GFTVLHEK	8	87	465.745	2	11.83	929.497	-23.5		69 86 79 90 96 93 96 87	GFTVLHEK	CID
LYDQLLQSYQQK	12	87	763.933	2	21.43	1525.78	47.8		85 76 97 95 98 95 89 95 85 73 81 74	LYDQLLQSYQQK	CID
NLPQVPAVTLVEVSR	15	87	541.328	3	21.27	1620.92	26.1		67 91 79 92 94 86 85 82 88 98 94 95 88 88 76	NLPQVPAVTLVEVSR	CID
QSPEKGYLAVAVVK	14	87	496.963	3	19.79	1487.83	22.2		40 60 85 95 92 86 96 98 98 96 92 93 97 89	QSPEKGYLAVAVVK	CID
MGDAADDKEAC(+57.02)FAVEGPK	18	87	955.943	2	18.52	1909.82	28.1	Carbamidomethylation	33 27 50 94 97 98 99 98 99 99 99 98 98 95 98 92 96 95	MGDAADDKEAC(+57.02)FAVEGPK	CID
WSATSPHVPK	10	87	555.302	2	14.02	1108.57	20.7		74 94 96 90 89 80 72 94 92 86	WSATSPHVPK	CID
C(+57.02)PLLAEKQYGFC(+57.02)K	13	87	807.418	2	23.04	1612.77	29.7	Carbamidomethylation	37 29 92 99 99 99 93 92 98 96 99 98 97	C(+57.02)PLLAEKQYGFC(+57.02)K	CID
QFYLLVQQK	9	87	583.828	2	16.91	1165.65	-6.7		86 95 96 97 96 95 83 51 82	QFYLLVQQK	CID
ASTHKSELAHR	11	87	412.878	3	9.43	1235.64	-20.9		73 75 90 90 92 62 87 98 98 97 96	ASTHKSELAHR	CID
SYLQLWAFDAVK	12	87	720.914	2	24.82	1439.74	47.3		85 85 97 94 98 94 90 87 85 81 79 72	SYLQLWAFDAVK	CID
ALKAWTRR	8	87	501.31	2	17.05	1000.59	11.6		84 93 92 97 90 80 79 79	ALKAWTRR	CID
RHPELSTPELLR	12	87	724.445	2	19.07	1446.79	55.7		66 67 89 93 94 90 93 80 90 95 98 98	RHPELSTPELLR	CID
EGKVVYPR	8	87	474.278	2	9.54	946.524	18		86 77 88 94 95 91 86 84	EGKVVYPR	CID
APTAATKR	8	87	408.245	2	9.44	814.466	10.5		92 95 97 97 92 83 65 81	APTAATKR	CID
VSESLSLKLPPNVVEESVK	19	87	685.414	3	25.52	2053.13	43.9		85 91 98 97 98 97 98 98 99 98 92 91 93 96 98 97 74 26 40	VSESLSLKLPPNVVEESVK	CID
C(+57.02)VDTHKSELAHR	12	87	726.852	2	2.71	1451.69	-3.3	Carbamidomethylation	60 76 94 95 91 92 90 94 93 89 86 91	C(+57.02)VDTHKSELAHR	CID
AHNVVTTR	8	87	449.257	2	10.75	896.483	18.6		89 90 96 96 98 90 68 74	AHNVVTTR	CID
YYC(+57.02)FR	5	87	404.678	2	13.51	807.337	4.7	Carbamidomethylation	85 90 92 88 82	YYC(+57.02)FR	CID
VDYGFKVK	8	87	478.258	2	17.05	954.517	-17.4		95 98 96 86 90 70 85 80	VDYGFKVK	CID
GQWEKPFEMK	10	87	427.228	3	15.56	1278.61	42.6		73 87 89 95 90 87 90 93 84 89	GQWEKPFEMK	CID
LQEC(+57.02)YNKPLLEK	12	87	512.281	3	12.43	1533.79	22.1	Carbamidomethylation	93 94 99 91 48 49 93 95 98 96 98 97	LQEC(+57.02)YNKPLLEK	CID
C(+57.02)LASLAGAK	9	87	445.767	2	10.21	889.469	57.4	Carbamidomethylation	57 97 98 97 97 97 56 95 92	C(+57.02)LASLAGAK	CID
FLGDGVDFNQLSSR	14	87	518.942	3	19.3	1553.75	37.3		96 98 90 95 79 83 83 60 80 87 95 94 93 90	FLGDGVDFNQLSSR	CID
GSYLKLVELSR	11	87	632.88	2	25.57	1263.72	20.5		33 57 95 99 97 99 98 99 96 96 92	GSYLKLVELSR	CID
LYRELAR	7	87	460.778	2	15.62	919.524	20		83 86 86 86 86 92 91	LYRELAR	CID
LGQYTSPVAKR	11	87	610.371	2	12.14	1218.67	45.7		91 86 93 98 97 95 86 85 77 71 81	LGQYTSPVAKR	CID
KLKKQTALVELLK	13	87	756.524	2	20.46	1510.98	34.4		43 79 59 95 90 92 90 97 97 98 98 100 98	KLKKQTALVELLK	CID
KGAC(+57.02)LLPK	8	87	443.77	2	12.88	885.511	16.2	Carbamidomethylation	84 92 90 66 72 97 99 99	KGAC(+57.02)LLPK	CID
YSLKLWAFDAVK	12	87	720.92	2	31.37	1439.78	30.6		48 51 97 96 99 95 97 96 94 90 96 89	YSLKLWAFDAVK	CID
ALTVTKVSGAKFPK	14	87	482.974	3	16.16	1445.86	27.4		90 96 98 97 96 95 93 88 56 65 74 85 91 95	ALTVTKVSGAKFPK	CID
YNGVFKEC(+57.02)C(+57.02)QAEDKKC(+57.02)LLPK	20	87	829.765	3	22.05	2486.18	38.8	Carbamidomethylation	89 89 94 98 99 97 97 92 85 79 84 89 85 78 72 65 75 88 94 94	YNGVFKEC(+57.02)C(+57.02)QAEDKKC(+57.02)LLPK	CID
AMTNLRKC(+57.02)STSK	12	87	466.238	3	9.11	1395.7	-3.1	Carbamidomethylation	93 82 95 88 93 91 84 82 76 78 92 90	AMTNLRKC(+57.02)STSK	CID
VYLGGGLK	8	87	403.747	2	16.01	805.47	11.8		90 95 98 83 79 73 93 85	VYLGGGLK	CID
ETKSLLFLGK	10	87	568.343	2	23.47	1134.66	6.3		74 75 82 89 92 95 92 93 86 93	ETKSLLFLGK	CID
FYLNKTR	7	87	471.269	2	16.66	940.513	12		84 92 94 85 86 90 77	FYLNKTR	CID
DVSMEAC(+57.02)C(+57.02)ADGHR	13	87	754.333	2	10.57	1506.56	57.8	Carbamidomethylation	51 44 96 93 99 99 98 94 93 93 84 88 97	DVSMEAC(+57.02)C(+57.02)ADGHR	CID
KEPLKVSK	8	87	464.788	2	9.16	927.575	-16		78 96 92 95 90 93 66 85	KEPLKVSK	CID
NFSVLFTKC(+57.02)DSSLVASEDVR	20	87	758.734	3	24.34	2273.1	35.1	Carbamidomethylation	71 82 81 85 96 91 90 88 92 92 92 92 84 85 79 80 94 93 90 81	NFSVLFTKC(+57.02)DSSLVASEDVR	CID
LSLSQHVK	8	87	456.259	2	16.57	910.524	-21.4		91 90 99 98 95 85 59 77	LSLSQHVK	CID
LC(+57.02)SKYAAYGK	10	87	580.799	2	12.03	1159.57	11.8	Carbamidomethylation	94 95 98 90 88 92 97 90 86 39	LC(+57.02)SKYAAYGK	CID
QVPQVVAPTLVEVSR	15	86	541.327	3	21.18	1620.92	23.4		79 91 66 83 96 80 79 76 93 99 97 98 92 88 83	QVPQVVAPTLVEVSR	CID
KVPQVSTPKNVEVSR	15	86	834.513	2	21.79	1666.94	45.5		80 96 92 96 95 94 93 87 82 77 77 88 82 83 76	KVPQVSTPKNVEVSR	CID
SGEQVAFK	8	86	433.231	2	11.52	864.434	14.8		83 84 94 85 86 90 90 82	SGEQVAFK	CID
LLAGAPPER	9	86	462.293	2	10.99	922.524	52.6		93 97 98 74 91 88 72 87 79	LLAGAPPER	CID
FKLEKDYDLVGALR	14	86	556.325	3	23.86	1665.91	27.2		61 75 93 96 86 92 93 97 97 95 66 80 90 89	FKLEKDYDLVGALR	CID
TFC(+57.02)PLTGLWPLNTLK	15	86	881.024	2	34.86	1759.93	56.6	Carbamidomethylation	54 59 97 97 99 97 91 96 95 88 90 82 84 92 79	TFC(+57.02)PLTGLWPLNTLK	CID
YLC(+57.02)DNQDTLSSR	12	86	736.355	2	13.05	1470.64	36.8	Carbamidomethylation	85 95 97 93 78 85 90 79 89 86 78 85	YLC(+57.02)DNQDTLSSR	CID
LLWESASLLR	10	86	594.362	2	27.41	1186.67	32.3		95 97 95 99 95 93 90 56 60 86	LLWESASLLR	CID
VAPLGEERYLGAR	13	86	477.593	3	17.5	1429.77	-7.8		95 96 98 97 89 95 94 92 74 48 67 85 93	VAPLGEERYLGAR	CID
QPC(+57.02)DQFEKLGEYGFKNALLVR	21	86	838.112	3	30.52	2511.26	22.2	Carbamidomethylation	55 37 56 96 70 82 98 74 82 96 99 99 99 97 93 88 96 99 99 99 99	QPC(+57.02)DQFEKLGEYGFKNALLVR	CID
TSDANLNWDLNKDKK	15	86	587.983	3	14.08	1760.87	32.4		93 96 99 94 90 95 90 86 97 80 38 74 88 92 84	TSDANLNWDLNKDKK	CID
SPLEVYNMMSR	11	86	663.857	2	26.61	1325.61	67.1		79 52 98 100 99 98 92 71 69 95 96	SPLEVYNMMSR	CID
ALKC(+57.02)ASLKK	9	86	509.799	2	9.06	1017.6	-17.3	Carbamidomethylation	86 92 91 96 89 88 94 55 87	ALKC(+57.02)ASLKK	CID
QLKKKERVELLK	12	86	756.517	2	20.79	1510.96	41.8		63 91 90 88 83 81 83 82 88 92 99 95	QLKKKERVELLK	CID
TSTNLNDALLR	11	86	609.34	2	21.57	1216.64	20.4		43 46 96 96 99 91 95 92 96 99 96	TSTNLNDALLR	CID
TC(+57.02)VADESHAKSMKSLHTLFGDELC(+57.02)K	25	86	955.484	3	21.54	2863.33	34.8	Carbamidomethylation	95 96 99 99 98 98 98 97 95 70 21 8 78 76 95 96 98 99 93 72 94 97 96 96 94	TC(+57.02)VADESHAKSMKSLHTLFGDELC(+57.02)K	CID
VLSPAGPEAQFELR	14	86	757.44	2	23.23	1512.79	48		51 65 98 96 98 98 95 98 95 82 71 85 88 85	VLSPAGPEAQFELR	CID
MAQAALAAVDYLDKHLPR	18	86	661.691	3	29.06	1982.04	4.8		29 81 81 89 93 96 95 94 91 95 92 90 90 82 82 90 92 90	MAQAALAAVDYLDKHLPR	CID
LFSAEEKAAVTSLFAK	16	86	856.496	2	23.79	1710.92	34.1		50 46 95 95 95 94 91 89 88 94 84 82 94 92 95 94	LFSAEEKAAVTSLFAK	CID
TANSAEEKAAVTSLFAK	17	86	869.504	2	32.26	1736.89	57.3		35 39 60 96 98 99 98 90 94 98 98 91 85 95 95 98 97	TANSAEEKAAVTSLFAK	CID
AERLR	5	86	322.69	2	8.98	643.376	-17.9		73 75 90 98 95	AERLR	CID
YALYEYSR	8	86	532.768	2	18.73	1063.5	23		77 85 98 95 96 87 79 71	YALYEYSR	CID
AWDVAR	6	86	359.188	2	12.91	716.361	1.6		79 83 95 89 90 79	AWDVAR	CID
AKPVLEDLRKGLLPVLESLK	20	86	740.145	3	35.12	2217.35	30.9		86 89 92 95 95 95 93 56 57 82 69 96 96 80 79 90 94 90 94 89	AKPVLEDLRKGLLPVLESLK	CID
LFTFHADLC(+57.02)TLPDTEKQLKK	20	86	602.088	4	24.4	2404.25	31.4	Carbamidomethylation	97 97 97 88 85 86 75 73 91 90 97 85 90 78 86 74 73 85 80 90	LFTFHADLC(+57.02)TLPDTEKQLKK	CID
DTHGADELAHR	11	86	407.873	3	3.76	1220.55	37		82 77 80 68 89 93 94 97 92 90 92	DTHGADELAHR	CID
LETMREK	7	86	453.747	2	10.29	905.464	17.6		91 97 97 68 88 95 68	LETMREK	CID
WFLGSFLYHGANR	13	86	784.418	2	31.44	1566.77	30.2		79 97 100 99 99 99 100 99 90 67 40 63 91	WFLGSFLYHGANR	CID
WLGDVGLTEVDHPR	14	86	797.452	2	10.68	1592.79	59.9		76 96 96 99 97 90 98 93 97 90 79 55 61 80	WLGDVGLTEVDHPR	CID
LKSKFPK	7	86	424.26	2	14.67	846.533	-32.9		93 85 82 80 82 92 88	LKSKFPK	CID
TAGWNLPMGLLYSK	14	86	775.946	2	25.63	1549.8	52.9		52 57 89 93 95 98 87 74 79 95 98 95 97 97	TAGWNLPMGLLYSK	CID
LVKC(+57.02)KSLR	8	86	502.299	2	3.11	1002.6	-17.2	Carbamidomethylation	95 92 89 81 81 78 85 88	LVKC(+57.02)KSLR	CID
HVTLEQPR	8	86	490.281	2	10.55	978.525	24.2		85 97 96 87 74 88 81 85	HVTLEQPR	CID
VAPLGEEFR	9	86	509.276	2	18.64	1016.53	7.4		71 86 95 94 70 88 93 89 93	VAPLGEEFR	CID
WFLGSFLQPDAMR	13	86	784.425	2	31.27	1566.77	44.4		44 79 99 98 98 98 98 90 88 95 67 82 90	WFLGSFLQPDAMR	CID
KVPKVSTPELVEVSR	15	86	834.526	2	21.75	1666.96	45.9		77 94 87 80 80 96 93 82 91 87 89 95 80 85 79	KVPKVSTPELVEVSR	CID
AFLDC(+57.02)C(+57.02)EYLTKLR	13	86	844.952	2	25.6	1687.81	48.9	Carbamidomethylation	41 46 94 99 98 97 99 98 98 92 81 94 86	AFLDC(+57.02)C(+57.02)EYLTKLR	CID
QSDLLFVGDDTK	12	86	446.582	3	14.36	1336.65	53.7		75 92 96 97 98 95 71 57 81 89 94 90	QSDLLFVGDDTK	CID
SDLYVSDAFHK	11	86	641.341	2	17.96	1280.6	49.6		59 90 96 99 96 90 85 88 86 85 76	SDLYVSDAFHK	CID
AEFVEVTKLSKKFPK	15	86	876.054	2	22.4	1750	51.5		33 59 90 95 99 97 97 89 92 94 81 89 95 94 90	AEFVEVTKLSKKFPK	CID
GYKHTLDKLDSVKVWPR	17	86	511.293	4	21.53	2041.11	15.3		27 48 86 91 95 96 97 96 97 98 96 95 94 89 79 90 96	GYKHTLDKLDSVKVWPR	CID
C(+57.02)C(+57.02)DSVSETSSLKELPEYAVK	20	86	768.054	3	21.84	2301.05	39.2	Carbamidomethylation	98 99 99 99 99 97 97 48 66 39 82 90 93 91 80 92 84 88 92 90	C(+57.02)C(+57.02)DSVSETSSLKELPEYAVK	CID
LLEPKGLR	8	86	463.288	2	16.26	924.576	-15.2		98 98 99 90 79 68 82 74	LLEPKGLR	CID
QGAASLAKK	9	86	437.253	2	18.29	872.508	-18.6		77 59 78 95 98 98 93 82 95	QGAASLAKK	CID
QFDLR	5	86	339.698	2	11.23	677.35	46.1		73 84 92 95 87	QFDLR	CID
QNC(+57.02)DQFKELGEYGFKDALLVR	21	85	844.117	3	27.62	2529.23	38.3	Carbamidomethylation	69 80 93 96 91 91 86 44 37 76 95 95 93 95 93 94 90 95 97 97 95	QNC(+57.02)DQFKELGEYGFKDALLVR	CID
C(+57.02)PRGLR	6	85	379.708	2	10.03	757.402	0.3	Carbamidomethylation	83 79 86 72 97 96	C(+57.02)PRGLR	CID
GLEHLDDLPKLSELSDLHAHK	21	85	789.774	3	27.31	2366.22	33.3		18 46 92 92 96 80 78 96 90 91 97 97 97 92 84 90 91 84 95 95 96	GLEHLDDLPKLSELSDLHAHK	CID
VALQNKFK	8	85	474.293	2	12.31	946.56	12.8		89 94 96 86 74 79 88 77	VALQNKFK	CID
LWYGFQDALLVR	12	85	740.927	2	25.92	1479.79	34.5		69 77 93 86 94 90 94 90 89 88 85 71	LWYGFQDALLVR	CID
SSQLHFLGR	9	85	522.798	2	18.95	1043.55	28.3		79 81 78 96 93 95 87 70 90	SSQLHFLGR	CID
FFKKKFFKFFKKFFKK	16	85	740.813	3	23.97	2219.32	44.5		89 90 93 94 82 45 45 95 97 97 95 93 89 92 85 86	FFKKKFFKFFKKFFKK	CID
C(+57.02)LASVSSEKAK	11	85	590.295	2	14.57	1178.6	-18.4	Carbamidomethylation	86 95 97 94 94 95 90 70 39 91 88	C(+57.02)LASVSSEKAK	CID
YLC(+57.02)DKHNTLSSK	12	85	733.345	2	11.75	1464.7	-18.5	Carbamidomethylation	93 96 96 95 86 60 26 85 94 97 99 98	YLC(+57.02)DKHNTLSSK	CID
NYTHKSELAHR	11	85	678.354	2	4.3	1354.67	13.6		74 82 82 85 88 86 96 87 90 84 86	NYTHKSELAHR	CID
VQAHVETLR	9	85	351.535	3	7.8	1051.58	4.4		68 68 73 82 96 98 95 95 93	VQAHVETLR	CID
LDPVNPMC(+57.02)LYR	11	85	689.364	2	25.62	1376.66	40.9	Carbamidomethylation	52 62 96 99 98 90 80 90 90 87 96	LDPVNPMC(+57.02)LYR	CID
RHPEYAVWLLR	11	85	720.44	2	21.92	1438.78	57.3		89 90 92 97 94 90 54 54 88 95 97	RHPEYAVWLLR	CID
LVLKDADDR	9	85	522.808	2	17.88	1043.56	38.6		89 92 90 82 87 57 89 92 88	LVLKDADDR	CID
FTYEYSRR	8	85	561.287	2	11.9	1120.53	26.6		94 95 97 95 72 69 75 85	FTYEYSRR	CID
KLEC(+57.02)C(+57.02)PK	7	85	467.716	2	12.57	933.441	-26.2	Carbamidomethylation	85 97 99 95 88 51 83	KLEC(+57.02)C(+57.02)PK	CID
VLSAADKRNK	10	85	551.329	2	8.81	1100.63	12.5		94 97 95 91 86 91 87 78 66 68	VLSAADKRNK	CID
LADHKLSSFKADVR	14	85	529.638	3	14.02	1585.86	20.7		90 90 93 81 85 92 85 77 77 74 74 93 91 90	LADHKLSSFKADVR	CID
DGMAADDKEAC(+57.02)FAVEGPK	18	85	955.945	2	18.56	1909.82	29.7	Carbamidomethylation	54 25 14 89 94 98 99 98 99 98 98 98 98 95 97 90 95 95	DGMAADDKEAC(+57.02)FAVEGPK	CID
VSPYVPWLEETMRR	14	85	588.322	3	27.65	1761.89	31.4		88 94 96 98 98 90 85 90 93 93 67 38 81 79	VSPYVPWLEETMRR	CID
LETMRTR	7	85	453.744	2	4.33	905.475	-1.3		92 96 94 51 86 92 85	LETMRTR	CID
FSSTESLVNR	10	85	570.259	2	12.33	1138.56	-50.7		70 51 77 97 97 94 98 91 86 90	FSSTESLVNR	CID
KFLPLKEC(+57.02)C(+57.02)PK	11	85	473.911	3	12.51	1418.74	-20.9	Carbamidomethylation	91 97 98 90 96 96 92 80 70 38 86	KFLPLKEC(+57.02)C(+57.02)PK	CID
EFKTQEELTPFFK	13	85	822.462	2	23.94	1642.82	51.7		48 33 89 95 88 94 97 96 94 91 90 97 92	EFKTQEELTPFFK	CID
GNQTALVELLK	11	85	593.385	2	25.72	1184.68	65.9		22 40 93 97 96 97 98 99 98 99 96	GNQTALVELLK	CID
FGGPFASK	8	85	405.71	2	4.48	809.407	-1.9		77 63 74 80 95 96 97 97	FGGPFASK	CID
C(+57.02)NGFC(+57.02)KGSVLQK	12	85	699.378	2	18.35	1396.66	58.2	Carbamidomethylation	62 66 57 96 99 99 95 84 79 97 90 95	C(+57.02)NGFC(+57.02)KGSVLQK	CID
QYSLVK	6	85	369.211	2	12.66	736.412	-5.7		73 83 85 92 95 81	QYSLVK	CID
YNGVFQEC(+57.02)C(+57.02)KAEDKGAC(+57.02)LLPK	21	85	829.751	3	22.09	2486.14	37	Carbamidomethylation	87 89 91 97 99 97 97 91 83 82 81 89 90 78 50 65 62 76 89 95 95	YNGVFQEC(+57.02)C(+57.02)KAEDKGAC(+57.02)LLPK	CID
VGLNFSPGQSFPASQAHLR	19	85	671.707	3	24.51	2012.02	37.2		81 33 69 94 97 98 82 68 90 96 98 94 91 82 77 86 84 96 96	VGLNFSPGQSFPASQAHLR	CID
VVVGPSVVAVPLPLHR	16	85	547.022	3	29.2	1638	27.9		90 93 97 94 89 91 97 98 98 98 93 96 77 40 23 82	VVVGPSVVAVPLPLHR	CID
DAFLGSFLYEYSR	13	85	784.416	2	22.42	1566.74	52.5		46 38 89 99 98 99 97 98 96 97 86 90 81	DAFLGSFLYEYSR	CID
LSKQFPKAEFVLDTK	15	85	584.349	3	19.75	1749.97	33.5		91 92 89 90 97 95 90 89 98 91 84 69 45 83 79	LSKQFPKAEFVLDTK	CID
FFKKFKFKFFKK	12	85	835.551	2	19.57	1668.99	57.3		79 79 90 96 93 51 55 96 95 96 96 94	FFKKFKFKFFKK	CID
MEQTEDYLSLLLNR	14	85	862.972	2	28.47	1723.85	49.1		62 45 24 97 100 100 99 100 99 99 99 94 86 88	MEQTEDYLSLLLNR	CID
GLAEFVEVTKLVTDLTK	17	85	621.707	3	10.72	1862.04	31.9		15 45 90 97 96 95 96 92 93 93 96 90 82 87 90 92 90	GLAEFVEVTKLVTDLTK	CID
VLLGAHNEKVR	11	85	412.584	3	10.89	1234.71	12.1		92 97 97 86 93 88 84 88 59 83 78	VLLGAHNEKVR	CID
TPVSEKVKTLC(+57.02)VLHEK	16	85	467.774	4	16.85	1867.02	24.2	Carbamidomethylation	96 95 93 90 93 85 89 86 84 84 52 78 90 79 95 82	TPVSEKVKTLC(+57.02)VLHEK	CID
RLEKSPDVLLAQLR	14	85	819.525	2	24.3	1636.96	44.9		50 48 91 90 95 86 94 96 98 95 90 86 88 92	RLEKSPDVLLAQLR	CID
C(+57.02)LKDGVGDVSFVR	13	85	726.393	2	21.84	1450.72	33	Carbamidomethylation	79 96 98 99 94 97 88 96 94 84 48 56 86	C(+57.02)LKDGVGDVSFVR	CID
WEFC(+57.02)NLKK	8	85	562.804	2	17.77	1123.55	39.7	Carbamidomethylation	70 98 95 92 78 88 85 78	WEFC(+57.02)NLKK	CID
FSSKVSK	7	85	391.745	2	9.05	781.433	53.6		70 81 74 86 96 99 92	FSSKVSK	CID
LKPDPNTLC(+57.02)DEFKWEK	16	85	505.763	4	19.36	2018.98	22.2	Carbamidomethylation	91 90 85 95 94 93 98 99 95 82 80 85 73 66 86 54	LKPDPNTLC(+57.02)DEFKWEK	CID
QNLHEK	6	85	384.691	2	11.78	767.393	-32.7		74 68 95 91 98 86	QNLHEK	CID
NPDELTFTVKTC(+57.02)VADESNETLPK	23	85	652.84	4	23.39	2607.24	35.9	Carbamidomethylation	83 87 92 97 96 93 78 62 73 85 89 91 92 93 94 95 88 77 84 75 88 61 90	NPDELTFTVKTC(+57.02)VADESNETLPK	CID
LRYFK	5	85	363.718	2	11.08	725.422	-0.5		89 86 86 89 76	LRYFK	CID
VANPTPR	7	85	377.713	2	8	753.413	-1.8		91 94 92 84 85 78 74	VANPTPR	CID
ASEKLKALEGK	11	85	587.351	2	12.35	1172.68	9.8		86 93 99 93 93 86 95 95 85 30 85	ASEKLKALEGK	CID
VVTGVANALAHRDGK	15	85	754.456	2	17.18	1506.83	46.8		95 96 99 96 98 99 98 99 98 95 90 94 44 20 61	VVTGVANALAHRDGK	CID
ETPQSSWDR	9	85	553.251	2	10.41	1104.48	3.7		77 52 97 96 92 92 74 91 95	ETPQSSWDR	CID
MALEDGGLAR	10	85	516.778	2	15.87	1031.51	33		59 94 99 98 96 79 78 91 71 88	MALEDGGLAR	CID
AVPFTGKVLLVDGK	14	85	722.475	2	25.92	1442.85	59.8		41 52 93 96 93 80 86 86 91 95 97 99 94 90	AVPFTGKVLLVDGK	CID
SLGKVASR	8	85	409.252	2	4.49	816.482	9.4		81 90 86 89 90 89 80 74	SLGKVASR	CID
MALEDNLAR	9	85	516.779	2	15.82	1031.51	34.6		67 95 99 99 97 82 88 51 86	MALEDNLAR	CID
LYELRAR	7	85	460.781	2	15.71	919.524	25.6		83 86 93 90 82 78 82	LYELRAR	CID
SYKERNELFLNR	12	85	523.628	3	14.89	1567.81	32.1		82 89 91 94 86 69 90 89 83 85 71 88	SYKERNELFLNR	CID
LETFR	5	85	333.164	2	4.08	664.354	-60.1		90 95 84 73 81	LETFR	CID
ALGWDVR	7	84	408.715	2	8.62	815.429	-17.4		91 93 69 70 84 90 95	ALGWDVR	CID
QEVLELPK	8	84	478.308	2	14.46	954.539	66.8		67 88 74 91 87 91 89 90	QEVLELPK	CID
QVPQVPAVTLVEVSR	15	84	541.327	3	21.13	1620.92	23.2		84 94 51 39 96 83 83 81 87 98 98 97 93 92 91	QVPQVPAVTLVEVSR	CID
AEFVEVTKLSQKFPK	15	84	876.038	2	22.45	1749.97	54.5		38 62 92 95 99 97 96 89 90 74 66 86 96 96 94	AEFVEVTKLSQKFPK	CID
KAPQLTSPELMALTKR	16	84	892.558	2	22.4	1783	55.6		89 98 83 84 97 99 97 85 93 91 69 93 93 69 59 52	KAPQLTSPELMALTKR	CID
DPVADYGKDLVEK	13	84	724.902	2	20.46	1447.72	48.6		52 35 57 97 99 99 92 91 95 97 96 98 88	DPVADYGKDLVEK	CID
FAHTVLSTR	9	84	516.296	2	12.48	1030.56	20.3		88 94 97 98 94 93 70 69 56	FAHTVLSTR	CID
MC(+57.02)PTEDYLSLLLNR	14	84	862.966	2	32.57	1723.83	51.9	Carbamidomethylation	51 86 80 98 99 98 91 94 91 66 74 88 83 82	MC(+57.02)PTEDYLSLLLNR	CID
LRDTHKSELAHR	12	84	731.855	2	2.69	1461.78	-57.6		34 46 92 95 94 93 93 96 90 91 93 96	LRDTHKSELAHR	CID
LVNELTEFAKTC(+57.02)VADESNEDVPK	23	84	652.831	4	23.42	2607.24	21.7	Carbamidomethylation	85 81 85 96 98 97 98 96 96 95 92 91 93 94 95 96 88 73 82 45 73 31 65	LVNELTEFAKTC(+57.02)VADESNEDVPK	CID
MFYDLR	6	84	422.696	2	16.34	843.395	-20.7		62 85 80 88 95 95	MFYDLR	CID
SVLGDVGLTEVFSDKVDLSGLTK	23	84	793.79	3	31.12	2378.26	37.7		40 49 98 96 99 97 93 99 97 98 94 92 88 88 68 63 76 84 79 65 87 94 93	SVLGDVGLTEVFSDKVDLSGLTK	CID
FLGDRDFNQLSSR	13	84	518.939	3	19.34	1553.76	22.9		97 98 88 94 92 90 35 51 91 93 92 90 85	FLGDRDFNQLSSR	CID
VASMLNK	7	84	381.711	2	14.35	761.411	-3.2		77 71 92 82 95 91 79	VASMLNK	CID
HVVPVLASYK	10	84	556.848	2	20.39	1111.64	38.1		88 98 99 95 92 92 90 67 44 77	HVVPVLASYK	CID
MQEAEDYLSLLLNR	14	84	847.962	2	33.77	1693.83	44.7		56 43 68 98 100 100 99 99 96 79 84 92 82 82	MQEAEDYLSLLLNR	CID
[truncated: 305 more rows]

## Sheet: caerin1.9+1.1_proteins
Accession	-10lgP	Coverage (%)	#Peptides	#Unique	PTM	Avg. Mass	Description
[truncated: 159 more rows]

[truncated: 3 more sheets: caerin1.9+1.1_peps, caerin1.9+1.1_denovo_peps, ESPs_quant_log2ratio]
